# Supplementary material for: WITHDRAWN: Integrative Analysis of the Proteome and Transcriptome in Gastric Cancer Identified Membrane Protein LRP1B as a Potential Biomarker
Source: Research Square preprint supplement (doi:10.21203/rs.3.rs-1280408/v1), 2022-01-26
Supplement: Supplementary file 1 [file 2694cbb70151b535935ac40e.xlsx]

## Sheet: AGS vs. GES-1
Protein	Label	log2FC	SE	Tvalue	DF	pvalue	adj_pvalue	Class	ProteinGroup	Description	Nr_Identity	Nr_E-value	Nr_Accession	Nr_Description
P15941	case2-VS-control	5.3826	0.109962	48.9497	8	3.36e-11	7.36e-08	Up	P15941	Mucin-1 OS=Homo sapiens OX=9606 GN=MUC1 PE=1 SV=3	100	0	P15941.3	RecName: Full=Mucin-1; Short=MUC-1; AltName: Full=Breast carcinoma-associated antigen DF3; AltName: Full=Cancer antigen 15-3; Short=CA 15-3; AltName: Full=Carcinoma-associated mucin; AltName: Full=Episialin; AltName: Full=H23AG; AltName: Full=Krebs von den Lungen-6; Short=KL-6; AltName: Full=PEMT; AltName: Full=Peanut-reactive urinary mucin; Short=PUM; AltName: Full=Polymorphic epithelial mucin; …
P12532	case2-VS-control	2.0957	0.0432182	48.4911	8	3.62e-11	7.36e-08	Up	P12532	Creatine kinase U-type, mitochondrial OS=Homo sapiens OX=9606 GN=CKMT1A PE=1 SV=1	100	0	NP_066270.1	creatine kinase U-type, mitochondrial precursor [Homo sapiens]
Q96AY3	case2-VS-control	-4.56972	0.0975653	-46.8376	8	4.77e-11	7.36e-08	Down	Q96AY3	Peptidyl-prolyl cis-trans isomerase FKBP10 OS=Homo sapiens OX=9606 GN=FKBP10 PE=1 SV=1	100	0	NP_068758.3	peptidyl-prolyl cis-trans isomerase FKBP10 precursor [Homo sapiens]
P16070	case2-VS-control	-4.92	0.111536	-44.1113	8	7.7e-11	8.7e-08	Down	P16070	CD44 antigen OS=Homo sapiens OX=9606 GN=CD44 PE=1 SV=3	100	0	NP_000601.3	CD44 antigen isoform 1 precursor [Homo sapiens]
P42765	case2-VS-control	-5.50718	0.128012	-43.0208	8	9.4e-11	8.7e-08	Down	P42765	3-ketoacyl-CoA thiolase, mitochondrial OS=Homo sapiens OX=9606 GN=ACAA2 PE=1 SV=2	100	0	NP_006102.2	3-ketoacyl-CoA thiolase, mitochondrial [Homo sapiens]
Q96FQ6	case2-VS-control	5.24922	0.139432	37.6471	8	2.72e-10	2.1e-07	Up	Q96FQ6	Protein S100-A16 OS=Homo sapiens OX=9606 GN=S100A16 PE=1 SV=1	100	2e-71	NP_525127.1	protein S100-A16 [Homo sapiens]
P52943	case2-VS-control	-2.91432	0.079485	-36.665	8	3.36e-10	2.22e-07	Down	P52943	Cysteine-rich protein 2 OS=Homo sapiens OX=9606 GN=CRIP2 PE=1 SV=1	100	8e-151	NP_001303.1	cysteine-rich protein 2 isoform 1 [Homo sapiens]
P13747	case2-VS-control	-4.7708	0.135023	-35.3332	8	4.51e-10	2.61e-07	Down	P13747	HLA class I histocompatibility antigen, alpha chain E OS=Homo sapiens OX=9606 GN=HLA-E PE=1 SV=3	100	0	P13747.3	RecName: Full=HLA class I histocompatibility antigen, alpha chain E; AltName: Full=MHC class I antigen E; Flags: Precursor
P55011	case2-VS-control	4.62993	0.135389	34.1971	8	5.84e-10	2.93e-07	Up	P55011	Solute carrier family 12 member 2 OS=Homo sapiens OX=9606 GN=SLC12A2 PE=1 SV=1	100	0	NP_001037.1	solute carrier family 12 member 2 isoform 1 [Homo sapiens]
Q8NF37	case2-VS-control	-1.95115	0.0576469	-33.8466	8	6.34e-10	2.93e-07	Down	Q8NF37	Lysophosphatidylcholine acyltransferase 1 OS=Homo sapiens OX=9606 GN=LPCAT1 PE=1 SV=2	100	0	NP_079106.3	lysophosphatidylcholine acyltransferase 1 [Homo sapiens]
P62736	case2-VS-control	7.1592	0.224454	31.8961	8	1.02e-09	4.22e-07	Up	P62736;P63267	Actin, aortic smooth muscle OS=Homo sapiens OX=9606 GN=ACTA2 PE=1 SV=1	100	0	NP_001604.1	actin, aortic smooth muscle [Homo sapiens]
P11166	case2-VS-control	3.58988	0.113614	31.5972	8	1.1e-09	4.22e-07	Up	P11166	Solute carrier family 2, facilitated glucose transporter member 1 OS=Homo sapiens OX=9606 GN=SLC2A1 PE=1 SV=2	100	0	BAD92224.1	solute carrier family 2 (facilitated glucose transporter), member 1 variant, partial [Homo sapiens]
Q9Y2D5	case2-VS-control	-6.06811	0.149989	-40.457	7	1.47e-09	5.23e-07	Down	Q9Y2D5	A-kinase anchor protein 2 OS=Homo sapiens OX=9606 GN=AKAP2 PE=1 SV=3	100	0	EAW59054.1	hCG28765, isoform CRA_d [Homo sapiens]
P23229	case2-VS-control	2.46517	0.0830948	29.6669	8	1.81e-09	5.97e-07	Up	P23229	Integrin alpha-6 OS=Homo sapiens OX=9606 GN=ITGA6 PE=1 SV=5	100	0	P23229.5	RecName: Full=Integrin alpha-6; AltName: Full=CD49 antigen-like family member F; AltName: Full=VLA-6; AltName: CD_antigen=CD49f; Contains: RecName: Full=Integrin alpha-6 heavy chain; Contains: RecName: Full=Integrin alpha-6 light chain; Contains: RecName: Full=Processed integrin alpha-6; Short=Alpha6p; Flags: Precursor
P27338	case2-VS-control	3.00494	0.102573	29.2956	8	2e-09	6.16e-07	Up	P27338	Amine oxidase [flavin-containing] B OS=Homo sapiens OX=9606 GN=MAOB PE=1 SV=3	100	0	NP_000889.3	amine oxidase [flavin-containing] B [Homo sapiens]
P08648	case2-VS-control	-2.49703	0.0863412	-28.9205	8	2.21e-09	6.4e-07	Down	P08648	Integrin alpha-5 OS=Homo sapiens OX=9606 GN=ITGA5 PE=1 SV=2	100	0	EAW96781.1	integrin, alpha 5 (fibronectin receptor, alpha polypeptide), isoform CRA_b [Homo sapiens]
Q03135	case2-VS-control	-4.68822	0.165466	-28.3335	8	2.6e-09	7.08e-07	Down	Q03135	Caveolin-1 OS=Homo sapiens OX=9606 GN=CAV1 PE=1 SV=4	100	9e-131	NP_001744.2	caveolin-1 isoform alpha [Homo sapiens]
Q9UBR2	case2-VS-control	-1.8073	0.0647449	-27.9142	8	2.93e-09	7.44e-07	Down	Q9UBR2	Cathepsin Z OS=Homo sapiens OX=9606 GN=CTSZ PE=1 SV=1	100	0	NP_001327.2	cathepsin Z preproprotein [Homo sapiens]
Q7Z2K6	case2-VS-control	2.34125	0.0843261	27.7642	8	3.06e-09	7.44e-07	Up	Q7Z2K6	Endoplasmic reticulum metallopeptidase 1 OS=Homo sapiens OX=9606 GN=ERMP1 PE=1 SV=2	100	0	NP_079172.2	endoplasmic reticulum metallopeptidase 1 [Homo sapiens]
Q6PI78	case2-VS-control	-5.4989	0.202019	-27.2197	8	3.58e-09	8.04e-07	Down	Q6PI78	Transmembrane protein 65 OS=Homo sapiens OX=9606 GN=TMEM65 PE=1 SV=2	100	6e-173	NP_919267.2	transmembrane protein 65 [Homo sapiens]
P05362	case2-VS-control	-2.39477	0.0886748	-27.0062	8	3.81e-09	8.04e-07	Down	P05362	Intercellular adhesion molecule 1 OS=Homo sapiens OX=9606 GN=ICAM1 PE=1 SV=2	100	0	NP_000192.2	intercellular adhesion molecule 1 precursor [Homo sapiens]
P11498	case2-VS-control	-2.702	0.100648	-26.846	8	3.99e-09	8.04e-07	Down	P11498	Pyruvate carboxylase, mitochondrial OS=Homo sapiens OX=9606 GN=PC PE=1 SV=2	100	0	NP_071504.2	pyruvate carboxylase, mitochondrial precursor [Homo sapiens]
Q13277	case2-VS-control	2.43895	0.0910078	26.7993	8	4.04e-09	8.04e-07	Up	Q13277	Syntaxin-3 OS=Homo sapiens OX=9606 GN=STX3 PE=1 SV=3	100	0	NP_004168.1	syntaxin-3 isoform 1 [Homo sapiens]
Q13510	case2-VS-control	2.38821	0.0894581	26.6964	8	4.17e-09	8.04e-07	Up	Q13510	Acid ceramidase OS=Homo sapiens OX=9606 GN=ASAH1 PE=1 SV=5	100	0	NP_808592.2	acid ceramidase isoform a preproprotein [Homo sapiens]
Q9NW38	case2-VS-control	-2.94325	0.0592333	-49.6891	6	4.46e-09	8.25e-07	Down	Q9NW38	E3 ubiquitin-protein ligase FANCL OS=Homo sapiens OX=9606 GN=FANCL PE=1 SV=2	100	0	NP_060532.2	E3 ubiquitin-protein ligase FANCL isoform 2 [Homo sapiens]
Q86WX3	case2-VS-control	1.98724	0.0794794	25.0032	8	7e-09	1.25e-06	Up	Q86WX3	Active regulator of SIRT1 OS=Homo sapiens OX=9606 GN=RPS19BP1 PE=1 SV=1	100	4e-94	NP_919307.1	active regulator of SIRT1 [Homo sapiens]
P29590	case2-VS-control	-2.12335	0.0854418	-24.8515	8	7.35e-09	1.26e-06	Down	P29590	Protein PML OS=Homo sapiens OX=9606 GN=PML PE=1 SV=3	100	0	NP_150241.2	protein PML isoform 1 [Homo sapiens]
Q9NZM1	case2-VS-control	2.18009	0.0889317	24.5142	8	8.19e-09	1.27e-06	Up	Q9NZM1	Myoferlin OS=Homo sapiens OX=9606 GN=MYOF PE=1 SV=1	100	0	NP_038479.1	myoferlin isoform a [Homo sapiens]
O75718	case2-VS-control	-2.84392	0.116025	-24.5113	8	8.2e-09	1.27e-06	Down	O75718	Cartilage-associated protein OS=Homo sapiens OX=9606 GN=CRTAP PE=1 SV=1	100	0	NP_006362.1	cartilage-associated protein precursor [Homo sapiens]
P13674	case2-VS-control	-2.72587	0.111303	-24.4906	8	8.25e-09	1.27e-06	Down	P13674	Prolyl 4-hydroxylase subunit alpha-1 OS=Homo sapiens OX=9606 GN=P4HA1 PE=1 SV=2	100	0	NP_001017962.1	prolyl 4-hydroxylase subunit alpha-1 isoform 2 precursor [Homo sapiens]
P06280	case2-VS-control	-1.5387	0.0645472	-23.8384	8	1.02e-08	1.52e-06	Down	P06280	Alpha-galactosidase A OS=Homo sapiens OX=9606 GN=GLA PE=1 SV=1	100	0	NP_000160.1	alpha-galactosidase A precursor [Homo sapiens]
P68366	case2-VS-control	-3.43648	0.113537	-30.2674	7	1.11e-08	1.6e-06	Down	P68366	Tubulin alpha-4A chain OS=Homo sapiens OX=9606 GN=TUBA4A PE=1 SV=1	100	0	NP_033473.1	tubulin alpha-4A chain isoform 1 [Mus musculus]
Q8WTV0	case2-VS-control	-1.51323	0.0644082	-23.4943	8	1.15e-08	1.61e-06	Down	Q8WTV0	Scavenger receptor class B member 1 OS=Homo sapiens OX=9606 GN=SCARB1 PE=1 SV=1	100	0	Q8WTV0.1	RecName: Full=Scavenger receptor class B member 1; Short=SRB1; AltName: Full=CD36 and LIMPII analogous 1; Short=CLA-1; AltName: Full=CD36 antigen-like 1; AltName: Full=Collagen type I receptor, thrombospondin receptor-like 1; AltName: Full=SR-BI; AltName: CD_antigen=CD36
Q07812	case2-VS-control	1.99367	0.0857575	23.2477	8	1.25e-08	1.66e-06	Up	Q07812	Apoptosis regulator BAX OS=Homo sapiens OX=9606 GN=BAX PE=1 SV=1	100	6e-138	NP_620116.1	apoptosis regulator BAX isoform alpha [Homo sapiens]
P28290	case2-VS-control	1.74539	0.0753682	23.1582	8	1.28e-08	1.66e-06	Up	P28290	Protein ITPRID2 OS=Homo sapiens OX=9606 GN=ITPRID2 PE=1 SV=3	100	0	NP_001123917.1	sperm-specific antigen 2 isoform 1 [Homo sapiens]
P11717	case2-VS-control	-1.85343	0.0801055	-23.1374	8	1.29e-08	1.66e-06	Down	P11717	Cation-independent mannose-6-phosphate receptor OS=Homo sapiens OX=9606 GN=IGF2R PE=1 SV=3	100	0	P11717.3	RecName: Full=Cation-independent mannose-6-phosphate receptor; Short=CI Man-6-P receptor; Short=CI-MPR; Short=M6PR; AltName: Full=300 kDa mannose 6-phosphate receptor; Short=MPR 300; AltName: Full=Insulin-like growth factor 2 receptor; AltName: Full=Insulin-like growth factor II receptor; Short=IGF-II receptor; AltName: Full=M6P/IGF2 receptor; Short=M6P/IGF2R; AltName: CD_antigen=CD222; Flags: Pr…
Q15738	case2-VS-control	-1.61279	0.0700542	-23.0221	8	1.34e-08	1.68e-06	Down	Q15738	Sterol-4-alpha-carboxylate 3-dehydrogenase, decarboxylating OS=Homo sapiens OX=9606 GN=NSDHL PE=1 SV=2	100	0	NP_057006.1	sterol-4-alpha-carboxylate 3-dehydrogenase, decarboxylating [Homo sapiens]
Q96DB5	case2-VS-control	-1.65155	0.0732455	-22.5481	8	1.58e-08	1.9e-06	Down	Q96DB5	Regulator of microtubule dynamics protein 1 OS=Homo sapiens OX=9606 GN=RMDN1 PE=1 SV=1	100	0	NP_057117.2	regulator of microtubule dynamics protein 1 isoform 1 [Homo sapiens]
O15460	case2-VS-control	-3.33285	0.147995	-22.52	8	1.6e-08	1.9e-06	Down	O15460	Prolyl 4-hydroxylase subunit alpha-2 OS=Homo sapiens OX=9606 GN=P4HA2 PE=1 SV=1	100	0	NP_004190.1	prolyl 4-hydroxylase subunit alpha-2 isoform 1 precursor [Homo sapiens]
Q6IQ22	case2-VS-control	-2.39463	0.107431	-22.2899	8	1.74e-08	1.96e-06	Down	Q6IQ22	Ras-related protein Rab-12 OS=Homo sapiens OX=9606 GN=RAB12 PE=1 SV=3	100	4e-180	NP_001020471.2	ras-related protein Rab-12 [Homo sapiens]
Q8WUH6	case2-VS-control	-2.48696	0.111863	-22.2323	8	1.77e-08	1.96e-06	Down	Q8WUH6	Transmembrane protein 263 OS=Homo sapiens OX=9606 GN=TMEM263 PE=1 SV=1	100	2e-76	NP_689474.1	transmembrane protein 263 isoform a [Homo sapiens]
Q8IVL6	case2-VS-control	-4.60149	0.117019	-39.3227	6	1.81e-08	1.96e-06	Down	Q8IVL6	Prolyl 3-hydroxylase 3 OS=Homo sapiens OX=9606 GN=P3H3 PE=1 SV=1	100	0	NP_055077.2	prolyl 3-hydroxylase 3 precursor [Homo sapiens]
Q96T23	case2-VS-control	-1.57641	0.0715627	-22.0283	8	1.9e-08	1.96e-06	Down	Q96T23	Remodeling and spacing factor 1 OS=Homo sapiens OX=9606 GN=RSF1 PE=1 SV=2	100	0	NP_057662.3	remodeling and spacing factor 1 [Homo sapiens]
Q13637	case2-VS-control	-1.83966	0.0839165	-21.9225	8	1.98e-08	1.96e-06	Down	Q13637	Ras-related protein Rab-32 OS=Homo sapiens OX=9606 GN=RAB32 PE=1 SV=3	100	3e-168	NP_006825.1	ras-related protein Rab-32 [Homo sapiens]
Q9P2B2	case2-VS-control	-2.5125	0.114643	-21.9159	8	1.98e-08	1.96e-06	Down	Q9P2B2	Prostaglandin F2 receptor negative regulator OS=Homo sapiens OX=9606 GN=PTGFRN PE=1 SV=2	100	0	NP_065173.2	prostaglandin F2 receptor negative regulator precursor [Homo sapiens]
P27105	case2-VS-control	-3.43846	0.0888408	-38.7036	6	1.99e-08	1.96e-06	Down	P27105	Erythrocyte band 7 integral membrane protein OS=Homo sapiens OX=9606 GN=STOM PE=1 SV=3	100	0	NP_004090.4	erythrocyte band 7 integral membrane protein isoform a [Homo sapiens]
P35221	case2-VS-control	-3.54948	0.162028	-21.9067	8	1.99e-08	1.96e-06	Down	P35221	Catenin alpha-1 OS=Homo sapiens OX=9606 GN=CTNNA1 PE=1 SV=1	100	0	NP_001894.2	catenin alpha-1 isoform 1 [Homo sapiens]
Q15833	case2-VS-control	1.71415	0.0793921	21.591	8	2.23e-08	2.15e-06	Up	Q15833	Syntaxin-binding protein 2 OS=Homo sapiens OX=9606 GN=STXBP2 PE=1 SV=2	100	0	NP_008880.2	syntaxin-binding protein 2 isoform a [Homo sapiens]
P43155	case2-VS-control	-2.18256	0.0806975	-27.0462	7	2.42e-08	2.27e-06	Down	P43155	Carnitine O-acetyltransferase OS=Homo sapiens OX=9606 GN=CRAT PE=1 SV=5	100	0	P43155.5	RecName: Full=Carnitine O-acetyltransferase; Short=Carnitine acetylase; AltName: Full=Carnitine acetyltransferase; Short=CAT; Short=CrAT
O43399	case2-VS-control	-0.955521	0.0447861	-21.3352	8	2.45e-08	2.27e-06	None	O43399	Tumor protein D54 OS=Homo sapiens OX=9606 GN=TPD52L2 PE=1 SV=2	100	1e-148	NP_003279.2	tumor protein D54 isoform e [Homo sapiens]
P37268	case2-VS-control	-2.40227	0.113531	-21.1596	8	2.61e-08	2.33e-06	Down	P37268	Squalene synthase OS=Homo sapiens OX=9606 GN=FDFT1 PE=1 SV=1	100	0	NP_004453.3	squalene synthase isoform 1 [Homo sapiens]
Q08257	case2-VS-control	1.6249	0.0768051	21.1561	8	2.62e-08	2.33e-06	Up	Q08257	Quinone oxidoreductase OS=Homo sapiens OX=9606 GN=CRYZ PE=1 SV=1	100	0	NP_001880.2	quinone oxidoreductase isoform a [Homo sapiens]
Q96K19	case2-VS-control	1.49318	0.0709889	21.0339	8	2.74e-08	2.39e-06	Up	Q96K19	E3 ubiquitin-protein ligase RNF170 OS=Homo sapiens OX=9606 GN=RNF170 PE=1 SV=2	100	0	NP_001153695.1	E3 ubiquitin-protein ligase RNF170 isoform a [Homo sapiens]
Q9Y5L4	case2-VS-control	-1.24281	0.0593315	-20.9469	8	2.83e-08	2.4e-06	Down	Q9Y5L4	Mitochondrial import inner membrane translocase subunit Tim13 OS=Homo sapiens OX=9606 GN=TIMM13 PE=1 SV=1	100	2e-65	NP_036590.1	mitochondrial import inner membrane translocase subunit Tim13 [Homo sapiens]
P10586	case2-VS-control	-2.15321	0.103057	-20.8934	8	2.89e-08	2.4e-06	Down	P10586	Receptor-type tyrosine-protein phosphatase F OS=Homo sapiens OX=9606 GN=PTPRF PE=1 SV=2	100	0	NP_002831.2	receptor-type tyrosine-protein phosphatase F isoform 1 precursor [Homo sapiens]
Q96GK7	case2-VS-control	-1.84408	0.0883253	-20.8783	8	2.91e-08	2.4e-06	Down	Q96GK7	Fumarylacetoacetate hydrolase domain-containing protein 2A OS=Homo sapiens OX=9606 GN=FAHD2A PE=1 SV=1	100	0	NP_057128.2	fumarylacetoacetate hydrolase domain-containing protein 2A [Homo sapiens]
Q13308	case2-VS-control	-1.11898	0.0540457	-20.7044	8	3.1e-08	2.52e-06	Down	Q13308	Inactive tyrosine-protein kinase 7 OS=Homo sapiens OX=9606 GN=PTK7 PE=1 SV=2	100	0	NP_002812.2	inactive tyrosine-protein kinase 7 isoform a precursor [Homo sapiens]
P15924	case2-VS-control	4.81669	0.135215	35.6223	6	3.26e-08	2.6e-06	Up	P15924	Desmoplakin OS=Homo sapiens OX=9606 GN=DSP PE=1 SV=3	100	0	NP_004406.2	desmoplakin isoform I [Homo sapiens]
P26232	case2-VS-control	-3.79397	0.186693	-20.322	8	3.59e-08	2.82e-06	Down	P26232	Catenin alpha-2 OS=Homo sapiens OX=9606 GN=CTNNA2 PE=1 SV=5	100	0	XP_004090482.2	PREDICTED: catenin alpha-2 isoform X1 [Nomascus leucogenys]
Q99536	case2-VS-control	1.35725	0.0677443	20.035	8	4.02e-08	3.08e-06	Up	Q99536	Synaptic vesicle membrane protein VAT-1 homolog OS=Homo sapiens OX=9606 GN=VAT1 PE=1 SV=2	100	0	NP_006364.2	synaptic vesicle membrane protein VAT-1 homolog [Homo sapiens]
Q15758	case2-VS-control	1.58705	0.0797921	19.8898	8	4.25e-08	3.08e-06	Up	Q15758	Neutral amino acid transporter B(0) OS=Homo sapiens OX=9606 GN=SLC1A5 PE=1 SV=2	100	0	NP_005619.1	neutral amino acid transporter B(0) isoform 1 [Homo sapiens]
Q07954	case2-VS-control	-2.40734	0.121072	-19.8836	8	4.27e-08	3.08e-06	Down	Q07954	Prolow-density lipoprotein receptor-related protein 1 OS=Homo sapiens OX=9606 GN=LRP1 PE=1 SV=2	100	0	NP_002323.2	prolow-density lipoprotein receptor-related protein 1 preproprotein [Homo sapiens]
O15438	case2-VS-control	2.57461	0.129717	19.8479	8	4.33e-08	3.08e-06	Up	O15438	Canalicular multispecific organic anion transporter 2 OS=Homo sapiens OX=9606 GN=ABCC3 PE=1 SV=3	100	0	NP_003777.2	canalicular multispecific organic anion transporter 2 isoform 1 [Homo sapiens]
P08069	case2-VS-control	-4.38765	0.129591	-33.8576	6	4.42e-08	3.08e-06	Down	P08069	Insulin-like growth factor 1 receptor OS=Homo sapiens OX=9606 GN=IGF1R PE=1 SV=1	100	0	NP_000866.1	insulin-like growth factor 1 receptor isoform 1 precursor [Homo sapiens]
Q9BTZ2	case2-VS-control	5.472	0.221047	24.7549	7	4.48e-08	3.08e-06	Up	Q9BTZ2	Dehydrogenase/reductase SDR family member 4 OS=Homo sapiens OX=9606 GN=DHRS4 PE=1 SV=3	100	0	NP_066284.2	dehydrogenase/reductase SDR family member 4 isoform 1 [Homo sapiens]
O00291	case2-VS-control	-3.96449	0.11771	-33.6802	6	4.56e-08	3.08e-06	Down	O00291	Huntingtin-interacting protein 1 OS=Homo sapiens OX=9606 GN=HIP1 PE=1 SV=5	100	0	NP_005329.3	huntingtin-interacting protein 1 isoform 1 [Homo sapiens]
Q96CN7	case2-VS-control	1.25809	0.0638298	19.71	8	4.57e-08	3.08e-06	Up	Q96CN7	Isochorismatase domain-containing protein 1 OS=Homo sapiens OX=9606 GN=ISOC1 PE=1 SV=3	100	0	NP_057132.2	isochorismatase domain-containing protein 1 [Homo sapiens]
P16144	case2-VS-control	3.77687	0.191713	19.7006	8	4.59e-08	3.08e-06	Up	P16144	Integrin beta-4 OS=Homo sapiens OX=9606 GN=ITGB4 PE=1 SV=5	100	0	XP_006721930.1	PREDICTED: integrin beta-4 isoform X3 [Homo sapiens]
Q96RT1	case2-VS-control	-1.92643	0.0977961	-19.6984	8	4.59e-08	3.08e-06	Down	Q96RT1	Erbin OS=Homo sapiens OX=9606 GN=ERBIN PE=1 SV=2	100	0	NP_001240626.1	erbin isoform 1 [Homo sapiens]
Q96EY8	case2-VS-control	-2.51193	0.128216	-19.5913	8	4.79e-08	3.14e-06	Down	Q96EY8	Cob(I)yrinic acid a,c-diamide adenosyltransferase, mitochondrial OS=Homo sapiens OX=9606 GN=MMAB PE=1 SV=1	100	0	NP_443077.1	cob(I)yrinic acid a,c-diamide adenosyltransferase, mitochondrial precursor [Homo sapiens]
Q15526	case2-VS-control	1.38789	0.0708922	19.5775	8	4.82e-08	3.14e-06	Up	Q15526	Surfeit locus protein 1 OS=Homo sapiens OX=9606 GN=SURF1 PE=1 SV=1	100	0	NP_003163.1	surfeit locus protein 1 isoform 1 [Homo sapiens]
P23468	case2-VS-control	-3.37138	0.138759	-24.2965	7	5.09e-08	3.25e-06	Down	P23468	Receptor-type tyrosine-protein phosphatase delta OS=Homo sapiens OX=9606 GN=PTPRD PE=1 SV=2	100	0	NP_002830.1	receptor-type tyrosine-protein phosphatase delta isoform 1 precursor [Homo sapiens]
Q56VL3	case2-VS-control	3.84179	0.19779	19.4236	8	5.13e-08	3.25e-06	Up	Q56VL3	OCIA domain-containing protein 2 OS=Homo sapiens OX=9606 GN=OCIAD2 PE=1 SV=1	100	1e-110	NP_001014446.1	OCIA domain-containing protein 2 isoform 1 [Homo sapiens]
Q02809	case2-VS-control	-1.75265	0.0903894	-19.39	8	5.2e-08	3.25e-06	Down	Q02809	Procollagen-lysine,2-oxoglutarate 5-dioxygenase 1 OS=Homo sapiens OX=9606 GN=PLOD1 PE=1 SV=2	100	0	NP_000293.2	procollagen-lysine,2-oxoglutarate 5-dioxygenase 1 isoform 2 precursor [Homo sapiens]
P11169	case2-VS-control	3.10588	0.161053	19.2849	8	5.42e-08	3.35e-06	Up	P11169	Solute carrier family 2, facilitated glucose transporter member 3 OS=Homo sapiens OX=9606 GN=SLC2A3 PE=1 SV=1	100	0	NP_008862.1	solute carrier family 2, facilitated glucose transporter member 3 [Homo sapiens]
Q96HY6	case2-VS-control	1.47289	0.0766534	19.215	8	5.58e-08	3.4e-06	Up	Q96HY6	DDRGK domain-containing protein 1 OS=Homo sapiens OX=9606 GN=DDRGK1 PE=1 SV=2	100	0	NP_076424.1	DDRGK domain-containing protein 1 [Homo sapiens]
O14908	case2-VS-control	1.31224	0.0684579	19.1686	8	5.69e-08	3.42e-06	Up	O14908	PDZ domain-containing protein GIPC1 OS=Homo sapiens OX=9606 GN=GIPC1 PE=1 SV=2	100	0	NP_005707.1	PDZ domain-containing protein GIPC1 isoform 1 [Homo sapiens]
Q96D53	case2-VS-control	2.79201	0.146076	19.1133	8	5.82e-08	3.45e-06	Up	Q96D53	Atypical kinase COQ8B, mitochondrial OS=Homo sapiens OX=9606 GN=COQ8B PE=1 SV=2	100	0	NP_079152.3	atypical kinase COQ8B, mitochondrial isoform a [Homo sapiens]
P51610	case2-VS-control	-1.27398	0.0668462	-19.0584	8	5.95e-08	3.49e-06	Down	P51610	Host cell factor 1 OS=Homo sapiens OX=9606 GN=HCFC1 PE=1 SV=2	100	0	NP_005325.2	host cell factor 1 [Homo sapiens]
Q14676	case2-VS-control	-4.62506	0.245774	-18.8183	8	6.57e-08	3.8e-06	Down	Q14676	Mediator of DNA damage checkpoint protein 1 OS=Homo sapiens OX=9606 GN=MDC1 PE=1 SV=3	100	0	NP_055456.2	mediator of DNA damage checkpoint protein 1 [Homo sapiens]
O00584	case2-VS-control	3.59173	0.192534	18.6551	8	7.04e-08	4.01e-06	Up	O00584	Ribonuclease T2 OS=Homo sapiens OX=9606 GN=RNASET2 PE=1 SV=2	100	0	NP_003721.2	ribonuclease T2 precursor [Homo sapiens]
P43353	case2-VS-control	1.81095	0.0972062	18.63	8	7.11e-08	4.01e-06	Up	P43353	Aldehyde dehydrogenase family 3 member B1 OS=Homo sapiens OX=9606 GN=ALDH3B1 PE=1 SV=1	100	0	NP_000685.1	aldehyde dehydrogenase family 3 member B1 isoform a [Homo sapiens]
Q9UBC2	case2-VS-control	-1.50869	0.0812648	-18.5651	8	7.31e-08	4.07e-06	Down	Q9UBC2	Epidermal growth factor receptor substrate 15-like 1 OS=Homo sapiens OX=9606 GN=EPS15L1 PE=1 SV=1	100	0	NP_001245303.1	epidermal growth factor receptor substrate 15-like 1 isoform 1 [Homo sapiens]
Q8WXI9	case2-VS-control	-1.78212	0.0961352	-18.5377	8	7.39e-08	4.07e-06	Down	Q8WXI9	Transcriptional repressor p66-beta OS=Homo sapiens OX=9606 GN=GATAD2B PE=1 SV=1	100	0	NP_065750.1	transcriptional repressor p66-beta [Homo sapiens]
P61764	case2-VS-control	-1.36528	0.073873	-18.4815	8	7.57e-08	4.12e-06	Down	P61764	Syntaxin-binding protein 1 OS=Homo sapiens OX=9606 GN=STXBP1 PE=1 SV=1	100	0	ERE71209.1	syntaxin-binding protein 1 [Cricetulus griseus]
P02786	case2-VS-control	-2.46627	0.134009	-18.4038	8	7.82e-08	4.21e-06	Down	P02786	Transferrin receptor protein 1 OS=Homo sapiens OX=9606 GN=TFRC PE=1 SV=2	100	0	NP_003225.2	transferrin receptor protein 1 isoform 1 [Homo sapiens]
Q9H5V8	case2-VS-control	1.41142	0.0769127	18.3509	8	8e-08	4.26e-06	Up	Q9H5V8	CUB domain-containing protein 1 OS=Homo sapiens OX=9606 GN=CDCP1 PE=1 SV=3	100	0	NP_073753.3	CUB domain-containing protein 1 isoform 1 precursor [Homo sapiens]
P54652	case2-VS-control	-0.524681	0.0298871	-17.5554	8	1.13e-07	5.9e-06	None	P54652	Heat shock-related 70 kDa protein 2 OS=Homo sapiens OX=9606 GN=HSPA2 PE=1 SV=1	100	0	NP_068814.2	heat shock-related 70 kDa protein 2 [Homo sapiens]
P35611	case2-VS-control	1.68081	0.0776724	21.6397	7	1.13e-07	5.9e-06	Up	P35611	Alpha-adducin OS=Homo sapiens OX=9606 GN=ADD1 PE=1 SV=2	100	0	NP_001110.2	alpha-adducin isoform a [Homo sapiens]
O94874	case2-VS-control	1.46433	0.0838746	17.4586	8	1.18e-07	6.08e-06	Up	O94874	E3 UFM1-protein ligase 1 OS=Homo sapiens OX=9606 GN=UFL1 PE=1 SV=2	100	0	NP_056138.1	E3 UFM1-protein ligase 1 [Homo sapiens]
P61224	case2-VS-control	-0.98285	0.0567524	-17.3182	8	1.26e-07	6.4e-06	None	P61224	Ras-related protein Rap-1b OS=Homo sapiens OX=9606 GN=RAP1B PE=1 SV=1	100	3e-134	NP_056461.1	ras-related protein Rap-1b isoform 1 precursor [Homo sapiens]
Q14249	case2-VS-control	-1.97944	0.114891	-17.2288	8	1.31e-07	6.59e-06	Down	Q14249	Endonuclease G, mitochondrial OS=Homo sapiens OX=9606 GN=ENDOG PE=1 SV=4	100	0	NP_004426.2	endonuclease G, mitochondrial precursor [Homo sapiens]
P55809	case2-VS-control	-2.13202	0.124215	-17.1639	8	1.35e-07	6.72e-06	Down	P55809	Succinyl-CoA:3-ketoacid coenzyme A transferase 1, mitochondrial OS=Homo sapiens OX=9606 GN=OXCT1 PE=1 SV=1	100	0	NP_000427.1	succinyl-CoA:3-ketoacid coenzyme A transferase 1, mitochondrial precursor [Homo sapiens]
P12236	case2-VS-control	1.32691	0.078533	16.8962	8	1.53e-07	7.52e-06	Up	P12236	ADP/ATP translocase 3 OS=Homo sapiens OX=9606 GN=SLC25A6 PE=1 SV=4	100	0	BAD93059.1	ADP,ATP carrier protein, liver isoform T2 variant, partial [Homo sapiens]
Q96SQ9	case2-VS-control	4.40558	0.213449	20.64	7	1.57e-07	7.66e-06	Up	Q96SQ9	Cytochrome P450 2S1 OS=Homo sapiens OX=9606 GN=CYP2S1 PE=1 SV=2	100	0	NP_085125.1	cytochrome P450 2S1 precursor [Homo sapiens]
Q8IX18	case2-VS-control	-1.86817	0.111139	-16.8094	8	1.59e-07	7.66e-06	Down	Q8IX18	Probable ATP-dependent RNA helicase DHX40 OS=Homo sapiens OX=9606 GN=DHX40 PE=1 SV=2	100	0	NP_078888.4	probable ATP-dependent RNA helicase DHX40 isoform 1 [Homo sapiens]
Q6IN84	case2-VS-control	2.76979	0.165248	16.7614	8	1.62e-07	7.66e-06	Up	Q6IN84	rRNA methyltransferase 1, mitochondrial OS=Homo sapiens OX=9606 GN=MRM1 PE=1 SV=1	100	0	NP_079140.2	rRNA methyltransferase 1, mitochondrial precursor [Homo sapiens]
P35610	case2-VS-control	-2.19872	0.131184	-16.7606	8	1.63e-07	7.66e-06	Down	P35610	Sterol O-acyltransferase 1 OS=Homo sapiens OX=9606 GN=SOAT1 PE=1 SV=3	100	0	NP_003092.4	sterol O-acyltransferase 1 isoform 1 [Homo sapiens]
Q96HV5	case2-VS-control	1.79633	0.107292	16.7424	8	1.64e-07	7.66e-06	Up	Q96HV5	Transmembrane protein 41A OS=Homo sapiens OX=9606 GN=TMEM41A PE=1 SV=1	100	0	NP_542383.1	transmembrane protein 41A precursor [Homo sapiens]
P26006	case2-VS-control	-1.67204	0.10069	-16.6058	8	1.75e-07	8.09e-06	Down	P26006	Integrin alpha-3 OS=Homo sapiens OX=9606 GN=ITGA3 PE=1 SV=5	100	0	NP_002195.1	integrin alpha-3 preproprotein [Homo sapiens]
Q96JB5	case2-VS-control	1.36385	0.0825462	16.5223	8	1.82e-07	8.33e-06	Up	Q96JB5	CDK5 regulatory subunit-associated protein 3 OS=Homo sapiens OX=9606 GN=CDK5RAP3 PE=1 SV=2	100	0	NP_788276.1	CDK5 regulatory subunit-associated protein 3 isoform b [Homo sapiens]
O00425	case2-VS-control	-2.33697	0.142425	-16.4085	8	1.92e-07	8.7e-06	Down	O00425	Insulin-like growth factor 2 mRNA-binding protein 3 OS=Homo sapiens OX=9606 GN=IGF2BP3 PE=1 SV=2	100	0	NP_006538.2	insulin-like growth factor 2 mRNA-binding protein 3 [Homo sapiens]
Q9Y6N5	case2-VS-control	1.26947	0.0779188	16.2922	8	2.03e-07	9.11e-06	Up	Q9Y6N5	Sulfide:quinone oxidoreductase, mitochondrial OS=Homo sapiens OX=9606 GN=SQOR PE=1 SV=1	100	0	NP_067022.1	sulfide:quinone oxidoreductase, mitochondrial [Homo sapiens]
Q7Z5L9	case2-VS-control	1.71042	0.10565	16.1895	8	2.13e-07	9.43e-06	Up	Q7Z5L9	Interferon regulatory factor 2-binding protein 2 OS=Homo sapiens OX=9606 GN=IRF2BP2 PE=1 SV=2	100	0	NP_892017.2	interferon regulatory factor 2-binding protein 2 isoform A [Homo sapiens]
Q99735	case2-VS-control	2.77395	0.171809	16.1455	8	2.18e-07	9.43e-06	Up	Q99735	Microsomal glutathione S-transferase 2 OS=Homo sapiens OX=9606 GN=MGST2 PE=1 SV=1	100	5e-104	NP_002404.1	microsomal glutathione S-transferase 2 isoform 1 precursor [Homo sapiens]
Q9NUP9	case2-VS-control	-1.12517	0.0697239	-16.1375	8	2.18e-07	9.43e-06	Down	Q9NUP9	Protein lin-7 homolog C OS=Homo sapiens OX=9606 GN=LIN7C PE=1 SV=1	100	8e-142	NP_035829.1	protein lin-7 homolog C [Mus musculus]
Q03252	case2-VS-control	-1.73023	0.107405	-16.1095	8	2.21e-07	9.43e-06	Down	Q03252	Lamin-B2 OS=Homo sapiens OX=9606 GN=LMNB2 PE=1 SV=4	100	0	NP_116126.3	lamin-B2 [Homo sapiens]
Q6NUM9	case2-VS-control	1.85193	0.115019	16.101	8	2.22e-07	9.43e-06	Up	Q6NUM9	All-trans-retinol 13,14-reductase OS=Homo sapiens OX=9606 GN=RETSAT PE=1 SV=2	100	0	NP_060220.3	all-trans-retinol 13,14-reductase precursor [Homo sapiens]
Q13011	case2-VS-control	2.87529	0.17882	16.0792	8	2.25e-07	9.43e-06	Up	Q13011	Delta(3,5)-Delta(2,4)-dienoyl-CoA isomerase, mitochondrial OS=Homo sapiens OX=9606 GN=ECH1 PE=1 SV=2	100	0	NP_001389.2	delta(3,5)-Delta(2,4)-dienoyl-CoA isomerase, mitochondrial precursor [Homo sapiens]
Q16576	case2-VS-control	-0.916296	0.0570201	-16.0697	8	2.26e-07	9.43e-06	None	Q16576	Histone-binding protein RBBP7 OS=Homo sapiens OX=9606 GN=RBBP7 PE=1 SV=1	100	0	NP_002884.1	histone-binding protein RBBP7 isoform 2 [Homo sapiens]
O00461	case2-VS-control	-2.363	0.147085	-16.0655	8	2.26e-07	9.43e-06	Down	O00461	Golgi integral membrane protein 4 OS=Homo sapiens OX=9606 GN=GOLIM4 PE=1 SV=1	100	0	NP_055313.1	Golgi integral membrane protein 4 isoform 1 [Homo sapiens]
Q9Y446	case2-VS-control	2.81964	0.175966	16.0238	8	2.31e-07	9.53e-06	Up	Q9Y446	Plakophilin-3 OS=Homo sapiens OX=9606 GN=PKP3 PE=1 SV=1	100	0	NP_009114.1	plakophilin-3 isoform PKP3a [Homo sapiens]
Q96JJ7	case2-VS-control	-1.18387	0.0743091	-15.9317	8	2.41e-07	9.88e-06	Down	Q96JJ7	Protein disulfide-isomerase TMX3 OS=Homo sapiens OX=9606 GN=TMX3 PE=1 SV=2	100	0	NP_061895.3	protein disulfide-isomerase TMX3 isoform 1 precursor [Homo sapiens]
Q7Z2T5	case2-VS-control	1.79987	0.113537	15.8527	8	2.51e-07	1.02e-05	Up	Q7Z2T5	TRMT1-like protein OS=Homo sapiens OX=9606 GN=TRMT1L PE=1 SV=2	100	0	NP_112196.3	TRMT1-like protein isoform 1 [Homo sapiens]
Q07817	case2-VS-control	2.27734	0.144874	15.7194	8	2.68e-07	1.08e-05	Up	Q07817	Bcl-2-like protein 1 OS=Homo sapiens OX=9606 GN=BCL2L1 PE=1 SV=1	100	5e-173	NP_612815.1	bcl-2-like protein 1 isoform Bcl-X(L) [Homo sapiens]
Q96S97	case2-VS-control	1.78854	0.114755	15.5857	8	2.86e-07	1.13e-05	Up	Q96S97	Myeloid-associated differentiation marker OS=Homo sapiens OX=9606 GN=MYADM PE=1 SV=2	100	0	NP_612382.1	myeloid-associated differentiation marker [Homo sapiens]
Q96QD8	case2-VS-control	2.06365	0.13243	15.5829	8	2.87e-07	1.13e-05	Up	Q96QD8	Sodium-coupled neutral amino acid transporter 2 OS=Homo sapiens OX=9606 GN=SLC38A2 PE=1 SV=2	100	0	NP_061849.2	sodium-coupled neutral amino acid transporter 2 isoform 1 [Homo sapiens]
P39748	case2-VS-control	-3.14892	0.127331	-24.7303	6	2.88e-07	1.13e-05	Down	P39748	Flap endonuclease 1 OS=Homo sapiens OX=9606 GN=FEN1 PE=1 SV=1	100	0	NP_004102.1	flap endonuclease 1 [Homo sapiens]
P51648	case2-VS-control	2.11771	0.136215	15.5469	8	2.92e-07	1.14e-05	Up	P51648	Fatty aldehyde dehydrogenase OS=Homo sapiens OX=9606 GN=ALDH3A2 PE=1 SV=1	100	0	NP_000373.1	fatty aldehyde dehydrogenase isoform 2 [Homo sapiens]
P04222	case2-VS-control	-2.77802	0.178885	-15.5296	8	2.94e-07	1.14e-05	Down	P04222	HLA class I histocompatibility antigen, Cw-3 alpha chain OS=Homo sapiens OX=9606 GN=HLA-C PE=1 SV=2	100	0	P04222.2	RecName: Full=HLA class I histocompatibility antigen, Cw-3 alpha chain; AltName: Full=MHC class I antigen Cw*3; Flags: Precursor
Q5T1C6	case2-VS-control	2.7662	0.178645	15.4844	8	3.01e-07	1.15e-05	Up	Q5T1C6	Acyl-coenzyme A thioesterase THEM4 OS=Homo sapiens OX=9606 GN=THEM4 PE=1 SV=1	100	3e-180	NP_444283.2	acyl-coenzyme A thioesterase THEM4 [Homo sapiens]
O14975	case2-VS-control	1.5612	0.101253	15.4188	8	3.11e-07	1.18e-05	Up	O14975	Very long-chain acyl-CoA synthetase OS=Homo sapiens OX=9606 GN=SLC27A2 PE=1 SV=2	100	0	NP_003636.2	very long-chain acyl-CoA synthetase isoform 1 [Homo sapiens]
Q9NU22	case2-VS-control	-0.56938	0.0371816	-15.3135	8	3.28e-07	1.23e-05	None	Q9NU22	Midasin OS=Homo sapiens OX=9606 GN=MDN1 PE=1 SV=2	100	0	NP_055426.1	midasin [Homo sapiens]
Q96GW9	case2-VS-control	0.929869	0.0610082	15.2417	8	3.4e-07	1.27e-05	None	Q96GW9	Methionine--tRNA ligase, mitochondrial OS=Homo sapiens OX=9606 GN=MARS2 PE=1 SV=2	100	0	AAH09115.1	MARS2 protein, partial [Homo sapiens]
P05413	case2-VS-control	-1.22086	0.0803929	-15.1862	8	3.5e-07	1.29e-05	Down	P05413	Fatty acid-binding protein, heart OS=Homo sapiens OX=9606 GN=FABP3 PE=1 SV=4	100	6e-92	NP_004093.1	fatty acid-binding protein, heart isoform 2 [Homo sapiens]
Q70UQ0	case2-VS-control	-3.6258	0.23923	-15.1561	8	3.56e-07	1.29e-05	Down	Q70UQ0	Inhibitor of nuclear factor kappa-B kinase-interacting protein OS=Homo sapiens OX=9606 GN=IKBIP PE=1 SV=1	100	0	NP_963906.1	inhibitor of nuclear factor kappa-B kinase-interacting protein isoform 2 [Homo sapiens]
Q8NBU5	case2-VS-control	0.737293	0.0486517	15.1545	8	3.56e-07	1.29e-05	None	Q8NBU5	ATPase family AAA domain-containing protein 1 OS=Homo sapiens OX=9606 GN=ATAD1 PE=1 SV=1	100	0	XP_013370259.1	PREDICTED: ATPase family AAA domain-containing protein 1 isoform X1 [Chinchilla lanigera]
Q9HAT2	case2-VS-control	1.94845	0.128648	15.1456	8	3.58e-07	1.29e-05	Up	Q9HAT2	Sialate O-acetylesterase OS=Homo sapiens OX=9606 GN=SIAE PE=1 SV=1	100	0	NP_733746.1	sialate O-acetylesterase isoform 1 precursor [Homo sapiens]
P05091	case2-VS-control	2.07373	0.137281	15.1058	8	3.65e-07	1.31e-05	Up	P05091	Aldehyde dehydrogenase, mitochondrial OS=Homo sapiens OX=9606 GN=ALDH2 PE=1 SV=2	100	0	NP_000681.2	aldehyde dehydrogenase, mitochondrial isoform 1 precursor [Homo sapiens]
Q9NR31	case2-VS-control	-1.28587	0.0853143	-15.0721	8	3.71e-07	1.32e-05	Down	Q9NR31	GTP-binding protein SAR1a OS=Homo sapiens OX=9606 GN=SAR1A PE=1 SV=1	100	6e-146	NP_064535.1	GTP-binding protein SAR1a [Homo sapiens]
P17931	case2-VS-control	1.65486	0.110272	15.007	8	3.84e-07	1.36e-05	Up	P17931	Galectin-3 OS=Homo sapiens OX=9606 GN=LGALS3 PE=1 SV=5	100	9e-179	NP_002297.2	galectin-3 isoform 1 [Homo sapiens]
P53701	case2-VS-control	-1.38476	0.0924362	-14.9807	8	3.89e-07	1.36e-05	Down	P53701	Cytochrome c-type heme lyase OS=Homo sapiens OX=9606 GN=HCCS PE=1 SV=1	100	0	NP_005324.3	cytochrome c-type heme lyase [Homo sapiens]
Q9Y2W2	case2-VS-control	1.48688	0.0992867	14.9757	8	3.9e-07	1.36e-05	Up	Q9Y2W2	WW domain-binding protein 11 OS=Homo sapiens OX=9606 GN=WBP11 PE=1 SV=1	100	0	NP_057396.1	WW domain-binding protein 11 [Homo sapiens]
P06756	case2-VS-control	-1.53499	0.102654	-14.9531	8	3.95e-07	1.36e-05	Down	P06756	Integrin alpha-V OS=Homo sapiens OX=9606 GN=ITGAV PE=1 SV=2	99.905	0	NP_002201.1	integrin alpha-V isoform 1 preproprotein [Homo sapiens]
P25440	case2-VS-control	-2.14761	0.119097	-18.0325	7	3.99e-07	1.37e-05	Down	P25440	Bromodomain-containing protein 2 OS=Homo sapiens OX=9606 GN=BRD2 PE=1 SV=2	100	0	NP_005095.1	bromodomain-containing protein 2 isoform 1 [Homo sapiens]
Q96HH9	case2-VS-control	1.89959	0.127377	14.9131	8	4.03e-07	1.37e-05	Up	Q96HH9	GRAM domain-containing protein 2B OS=Homo sapiens OX=9606 GN=GRAMD2B PE=1 SV=1	100	0	NP_076416.2	GRAM domain-containing protein 2B isoform 2 [Homo sapiens]
P61769	case2-VS-control	-2.26896	0.153413	-14.7899	8	4.3e-07	1.45e-05	Down	P61769	Beta-2-microglobulin OS=Homo sapiens OX=9606 GN=B2M PE=1 SV=1	99.16	2e-84	CAG33347.1	B2M [Homo sapiens]
Q5T440	case2-VS-control	2.36855	0.161077	14.7045	8	4.5e-07	1.49e-05	Up	Q5T440	Putative transferase CAF17, mitochondrial OS=Homo sapiens OX=9606 GN=IBA57 PE=1 SV=1	100	0	NP_001010867.1	putative transferase CAF17, mitochondrial isoform 1 precursor [Homo sapiens]
Q92747	case2-VS-control	1.64102	0.111605	14.7038	8	4.5e-07	1.49e-05	Up	Q92747	Actin-related protein 2/3 complex subunit 1A OS=Homo sapiens OX=9606 GN=ARPC1A PE=2 SV=2	100	0	NP_006400.2	actin-related protein 2/3 complex subunit 1A isoform 1 [Homo sapiens]
P22694	case2-VS-control	-1.29176	0.0878648	-14.7016	8	4.5e-07	1.49e-05	Down	P22694	cAMP-dependent protein kinase catalytic subunit beta OS=Homo sapiens OX=9606 GN=PRKACB PE=1 SV=2	100	0	NP_002722.1	cAMP-dependent protein kinase catalytic subunit beta isoform 2 [Homo sapiens]
Q16658	case2-VS-control	-3.68854	0.162637	-22.6796	6	4.81e-07	1.58e-05	Down	Q16658	Fascin OS=Homo sapiens OX=9606 GN=FSCN1 PE=1 SV=3	100	0	AAH07539.1	FSCN1 protein, partial [Homo sapiens]
O00483	case2-VS-control	0.786497	0.0543926	14.4596	8	5.12e-07	1.67e-05	None	O00483	Cytochrome c oxidase subunit NDUFA4 OS=Homo sapiens OX=9606 GN=NDUFA4 PE=1 SV=1	100	1e-54	NP_002480.1	cytochrome c oxidase subunit NDUFA4 [Homo sapiens]
Q9NZ63	case2-VS-control	-1.46155	0.101423	-14.4103	8	5.26e-07	1.7e-05	Down	Q9NZ63	Telomere length and silencing protein 1 homolog OS=Homo sapiens OX=9606 GN=C9orf78 PE=1 SV=1	100	0	NP_057604.1	uncharacterized protein C9orf78 [Homo sapiens]
O60506	case2-VS-control	0.895526	0.0623383	14.3656	8	5.38e-07	1.73e-05	None	O60506	Heterogeneous nuclear ribonucleoprotein Q OS=Homo sapiens OX=9606 GN=SYNCRIP PE=1 SV=2	100	0	NP_006363.4	heterogeneous nuclear ribonucleoprotein Q isoform 1 [Homo sapiens]
Q8NFJ5	case2-VS-control	1.5857	0.110532	14.3461	8	5.44e-07	1.73e-05	Up	Q8NFJ5	Retinoic acid-induced protein 3 OS=Homo sapiens OX=9606 GN=GPRC5A PE=1 SV=2	100	0	NP_003970.1	retinoic acid-induced protein 3 [Homo sapiens]
P51114	case2-VS-control	-0.945597	0.0659547	-14.3371	8	5.47e-07	1.73e-05	None	P51114	Fragile X mental retardation syndrome-related protein 1 OS=Homo sapiens OX=9606 GN=FXR1 PE=1 SV=3	100	0	NP_005078.2	fragile X mental retardation syndrome-related protein 1 isoform a [Homo sapiens]
Q16822	case2-VS-control	1.3422	0.0938761	14.2976	8	5.59e-07	1.76e-05	Up	Q16822	Phosphoenolpyruvate carboxykinase [GTP], mitochondrial OS=Homo sapiens OX=9606 GN=PCK2 PE=1 SV=4	100	0	NP_004554.3	phosphoenolpyruvate carboxykinase [GTP], mitochondrial isoform 1 precursor [Homo sapiens]
P04899	case2-VS-control	-1.78915	0.125255	-14.2841	8	5.63e-07	1.76e-05	Down	P04899	Guanine nucleotide-binding protein G(i) subunit alpha-2 OS=Homo sapiens OX=9606 GN=GNAI2 PE=1 SV=3	100	0	NP_002061.1	guanine nucleotide-binding protein G(i) subunit alpha-2 isoform 1 [Homo sapiens]
Q5RI15	case2-VS-control	2.02604	0.142482	14.2196	8	5.83e-07	1.81e-05	Up	Q5RI15	Cytochrome c oxidase assembly protein COX20, mitochondrial OS=Homo sapiens OX=9606 GN=COX20 PE=1 SV=2	100	2e-83	NP_932342.1	cytochrome c oxidase protein 20 homolog isoform 1 [Homo sapiens]
Q92841	case2-VS-control	0.756693	0.0532943	14.1984	8	5.89e-07	1.82e-05	None	Q92841	Probable ATP-dependent RNA helicase DDX17 OS=Homo sapiens OX=9606 GN=DDX17 PE=1 SV=2	100	0	NP_006377.2	probable ATP-dependent RNA helicase DDX17 isoform 1 [Homo sapiens]
Q53FA7	case2-VS-control	2.36496	0.16676	14.1818	8	5.95e-07	1.82e-05	Up	Q53FA7	Quinone oxidoreductase PIG3 OS=Homo sapiens OX=9606 GN=TP53I3 PE=1 SV=2	100	0	NP_004872.2	quinone oxidoreductase PIG3 isoform 1 [Homo sapiens]
P78362	case2-VS-control	-2.76012	0.162635	-16.9712	7	6.04e-07	1.84e-05	Down	P78362	SRSF protein kinase 2 OS=Homo sapiens OX=9606 GN=SRPK2 PE=1 SV=3	100	0	NP_872633.1	SRSF protein kinase 2 isoform b precursor [Homo sapiens]
Q6ZRP7	case2-VS-control	-1.61694	0.114903	-14.0722	8	6.32e-07	1.89e-05	Down	Q6ZRP7	Sulfhydryl oxidase 2 OS=Homo sapiens OX=9606 GN=QSOX2 PE=1 SV=3	100	0	NP_859052.3	sulfhydryl oxidase 2 precursor [Homo sapiens]
P08236	case2-VS-control	-1.22736	0.0872295	-14.0705	8	6.32e-07	1.89e-05	Down	P08236	Beta-glucuronidase OS=Homo sapiens OX=9606 GN=GUSB PE=1 SV=2	100	0	NP_000172.2	beta-glucuronidase isoform 1 precursor [Homo sapiens]
Q8WW12	case2-VS-control	2.2085	0.156978	14.0689	8	6.33e-07	1.89e-05	Up	Q8WW12	PEST proteolytic signal-containing nuclear protein OS=Homo sapiens OX=9606 GN=PCNP PE=1 SV=2	100	5e-125	NP_065090.1	PEST proteolytic signal-containing nuclear protein isoform a [Homo sapiens]
P09417	case2-VS-control	1.0847	0.0773231	14.0282	8	6.47e-07	1.91e-05	Up	P09417	Dihydropteridine reductase OS=Homo sapiens OX=9606 GN=QDPR PE=1 SV=2	100	4e-180	NP_000311.2	dihydropteridine reductase isoform 1 [Homo sapiens]
P15291	case2-VS-control	1.6237	0.115765	14.0258	8	6.48e-07	1.91e-05	Up	P15291	Beta-1,4-galactosyltransferase 1 OS=Homo sapiens OX=9606 GN=B4GALT1 PE=1 SV=5	100	0	NP_001488.2	beta-1,4-galactosyltransferase 1 [Homo sapiens]
P78357	case2-VS-control	-3.84341	0.275864	-13.9323	8	6.82e-07	2e-05	Down	P78357	Contactin-associated protein 1 OS=Homo sapiens OX=9606 GN=CNTNAP1 PE=1 SV=1	100	0	NP_003623.1	contactin-associated protein 1 precursor [Homo sapiens]
Q9Y394	case2-VS-control	1.15444	0.0829504	13.9173	8	6.88e-07	2e-05	Up	Q9Y394	Dehydrogenase/reductase SDR family member 7 OS=Homo sapiens OX=9606 GN=DHRS7 PE=1 SV=1	100	0	NP_057113.1	dehydrogenase/reductase SDR family member 7 isoform 1 precursor [Homo sapiens]
Q6PL18	case2-VS-control	-1.61471	0.116246	-13.8904	8	6.98e-07	2e-05	Down	Q6PL18	ATPase family AAA domain-containing protein 2 OS=Homo sapiens OX=9606 GN=ATAD2 PE=1 SV=1	100	0	NP_054828.2	ATPase family AAA domain-containing protein 2 [Homo sapiens]
O14776	case2-VS-control	-1.21722	0.0876422	-13.8885	8	6.99e-07	2e-05	Down	O14776	Transcription elongation regulator 1 OS=Homo sapiens OX=9606 GN=TCERG1 PE=1 SV=2	100	0	NP_006697.2	transcription elongation regulator 1 isoform 1 [Homo sapiens]
Q8N129	case2-VS-control	-2.00534	0.144443	-13.8833	8	7.01e-07	2e-05	Down	Q8N129	Protein canopy homolog 4 OS=Homo sapiens OX=9606 GN=CNPY4 PE=2 SV=1	100	9e-179	NP_689968.1	protein canopy homolog 4 precursor [Homo sapiens]
O00194	case2-VS-control	1.9166	0.13827	13.8612	8	7.1e-07	2.01e-05	Up	O00194	Ras-related protein Rab-27B OS=Homo sapiens OX=9606 GN=RAB27B PE=1 SV=4	99.541	1e-163	XP_008012218.1	PREDICTED: ras-related protein Rab-27B isoform X1 [Chlorocebus sabaeus]
Q13112	case2-VS-control	-2.58893	0.187148	-13.8336	8	7.21e-07	2.03e-05	Down	Q13112	Chromatin assembly factor 1 subunit B OS=Homo sapiens OX=9606 GN=CHAF1B PE=1 SV=1	100	0	NP_005432.1	chromatin assembly factor 1 subunit B [Homo sapiens]
Q49A26	case2-VS-control	-2.22325	0.160791	-13.8269	8	7.23e-07	2.03e-05	Down	Q49A26	Putative oxidoreductase GLYR1 OS=Homo sapiens OX=9606 GN=GLYR1 PE=1 SV=4	100	0	NP_115958.2	putative oxidoreductase GLYR1 isoform 1 [Homo sapiens]
Q96CP6	case2-VS-control	2.61943	0.0867167	30.2068	5	7.46e-07	2.08e-05	Up	Q96CP6	GRAM domain-containing protein 1A OS=Homo sapiens OX=9606 GN=GRAMD1A PE=1 SV=2	100	0	NP_065946.2	GRAM domain-containing protein 1A isoform 1 [Homo sapiens]
P45973	case2-VS-control	-1.94364	0.141451	-13.7407	8	7.59e-07	2.1e-05	Down	P45973	Chromobox protein homolog 5 OS=Homo sapiens OX=9606 GN=CBX5 PE=1 SV=1	100	1e-137	NP_036249.1	chromobox protein homolog 5 [Homo sapiens]
P28347	case2-VS-control	-2.41542	0.147586	-16.3661	7	7.75e-07	2.13e-05	Down	P28347	Transcriptional enhancer factor TEF-1 OS=Homo sapiens OX=9606 GN=TEAD1 PE=1 SV=2	100	0	NP_068780.2	transcriptional enhancer factor TEF-1 [Homo sapiens]
Q4VC31	case2-VS-control	-0.862156	0.0631353	-13.6557	8	7.96e-07	2.18e-05	None	Q4VC31	Coiled-coil domain-containing protein 58 OS=Homo sapiens OX=9606 GN=CCDC58 PE=1 SV=1	100	7e-104	NP_001017928.1	coiled-coil domain-containing protein 58 isoform 1 [Homo sapiens]
P48735	case2-VS-control	-1.00604	0.0737293	-13.6451	8	8.01e-07	2.18e-05	Down	P48735	Isocitrate dehydrogenase [NADP], mitochondrial OS=Homo sapiens OX=9606 GN=IDH2 PE=1 SV=2	100	0	NP_002159.2	isocitrate dehydrogenase [NADP], mitochondrial isoform 1 precursor [Homo sapiens]
Q32P28	case2-VS-control	-1.79908	0.132355	-13.5929	8	8.25e-07	2.23e-05	Down	Q32P28	Prolyl 3-hydroxylase 1 OS=Homo sapiens OX=9606 GN=P3H1 PE=1 SV=2	100	0	NP_071751.3	prolyl 3-hydroxylase 1 isoform 1 precursor [Homo sapiens]
O95470	case2-VS-control	1.67745	0.124746	13.4469	8	8.96e-07	2.4e-05	Up	O95470	Sphingosine-1-phosphate lyase 1 OS=Homo sapiens OX=9606 GN=SGPL1 PE=1 SV=3	100	0	NP_003892.2	sphingosine-1-phosphate lyase 1 [Homo sapiens]
P01034	case2-VS-control	2.18989	0.162873	13.4454	8	8.97e-07	2.4e-05	Up	P01034	Cystatin-C OS=Homo sapiens OX=9606 GN=CST3 PE=1 SV=1	100	8e-106	NP_000090.1	cystatin-C precursor [Homo sapiens]
P24666	case2-VS-control	1.89121	0.141001	13.4127	8	9.14e-07	2.43e-05	Up	P24666	Low molecular weight phosphotyrosine protein phosphatase OS=Homo sapiens OX=9606 GN=ACP1 PE=1 SV=3	100	2e-117	NP_004291.1	low molecular weight phosphotyrosine protein phosphatase isoform c [Homo sapiens]
Q15437	case2-VS-control	1.79656	0.134268	13.3804	8	9.31e-07	2.46e-05	Up	Q15437	Protein transport protein Sec23B OS=Homo sapiens OX=9606 GN=SEC23B PE=1 SV=2	100	0	NP_116780.1	protein transport protein Sec23B isoform 1 [Homo sapiens]
P98196	case2-VS-control	1.80282	0.1348	13.374	8	9.35e-07	2.46e-05	Up	P98196	Probable phospholipid-transporting ATPase IH OS=Homo sapiens OX=9606 GN=ATP11A PE=1 SV=3	100	0	NP_056020.2	probable phospholipid-transporting ATPase IH isoform a [Homo sapiens]
P60059	case2-VS-control	1.10389	0.0827744	13.3362	8	9.55e-07	2.5e-05	Up	P60059	Protein transport protein Sec61 subunit gamma OS=Homo sapiens OX=9606 GN=SEC61G PE=1 SV=1	100	7e-43	OPJ76085.1	protein transport protein Sec61 subunit gamma [Patagioenas fasciata monilis]
P56937	case2-VS-control	-2.48808	0.187147	-13.2948	8	9.78e-07	2.54e-05	Down	P56937	3-keto-steroid reductase OS=Homo sapiens OX=9606 GN=HSD17B7 PE=1 SV=1	100	0	NP_057455.1	3-keto-steroid reductase isoform 1 [Homo sapiens]
Q6L8Q7	case2-VS-control	1.12734	0.0854147	13.1985	8	1.03e-06	2.68e-05	Up	Q6L8Q7	2',5'-phosphodiesterase 12 OS=Homo sapiens OX=9606 GN=PDE12 PE=1 SV=2	100	0	NP_808881.3	2',5'-phosphodiesterase 12 isoform 1 precursor [Homo sapiens]
Q5HYK3	case2-VS-control	-1.23497	0.0937984	-13.1662	8	1.05e-06	2.69e-05	Down	Q5HYK3	2-methoxy-6-polyprenyl-1,4-benzoquinol methylase, mitochondrial OS=Homo sapiens OX=9606 GN=COQ5 PE=1 SV=2	100	0	NP_115690.3	2-methoxy-6-polyprenyl-1,4-benzoquinol methylase, mitochondrial precursor [Homo sapiens]
Q9H3K2	case2-VS-control	1.49916	0.113918	13.16	8	1.06e-06	2.69e-05	Up	Q9H3K2	Growth hormone-inducible transmembrane protein OS=Homo sapiens OX=9606 GN=GHITM PE=1 SV=2	100	0	NP_055209.2	growth hormone-inducible transmembrane protein [Homo sapiens]
P52292	case2-VS-control	-1.22953	0.0934387	-13.1586	8	1.06e-06	2.69e-05	Down	P52292	Importin subunit alpha-1 OS=Homo sapiens OX=9606 GN=KPNA2 PE=1 SV=1	100	0	NP_002257.1	importin subunit alpha-1 [Homo sapiens]
Q14573	case2-VS-control	1.19239	0.0907593	13.138	8	1.07e-06	2.71e-05	Up	Q14573	Inositol 1,4,5-trisphosphate receptor type 3 OS=Homo sapiens OX=9606 GN=ITPR3 PE=1 SV=2	100	0	NP_002215.2	inositol 1,4,5-trisphosphate receptor type 3 [Homo sapiens]
Q86W92	case2-VS-control	-0.917063	0.070194	-13.0647	8	1.12e-06	2.81e-05	None	Q86W92	Liprin-beta-1 OS=Homo sapiens OX=9606 GN=PPFIBP1 PE=1 SV=2	100	0	Q86W92.2	RecName: Full=Liprin-beta-1; AltName: Full=Protein tyrosine phosphatase receptor type f polypeptide-interacting protein-binding protein 1; Short=PTPRF-interacting protein-binding protein 1; AltName: Full=hSGT2
Q6RFH5	case2-VS-control	0.679042	0.05212	13.0284	8	1.14e-06	2.86e-05	None	Q6RFH5	WD repeat-containing protein 74 OS=Homo sapiens OX=9606 GN=WDR74 PE=1 SV=1	100	0	NP_060563.2	WD repeat-containing protein 74 isoform 1 [Homo sapiens]
O43852	case2-VS-control	-1.98093	0.153336	-12.9189	8	1.22e-06	3.03e-05	Down	O43852	Calumenin OS=Homo sapiens OX=9606 GN=CALU PE=1 SV=2	100	0	NP_001186600.1	calumenin isoform c precursor [Homo sapiens]
Q8WWI1	case2-VS-control	1.88337	0.145847	12.9133	8	1.22e-06	3.03e-05	Up	Q8WWI1	LIM domain only protein 7 OS=Homo sapiens OX=9606 GN=LMO7 PE=1 SV=3	100	0	Q8WWI1.3	RecName: Full=LIM domain only protein 7; Short=LMO-7; AltName: Full=F-box only protein 20; AltName: Full=LOMP
Q14739	case2-VS-control	1.38725	0.107701	12.8806	8	1.25e-06	3.07e-05	Up	Q14739	Lamin-B receptor OS=Homo sapiens OX=9606 GN=LBR PE=1 SV=2	100	0	NP_002287.2	lamin-B receptor [Homo sapiens]
O00592	case2-VS-control	-1.16969	0.0909552	-12.8601	8	1.26e-06	3.09e-05	Down	O00592	Podocalyxin OS=Homo sapiens OX=9606 GN=PODXL PE=1 SV=2	100	0	NP_001018121.1	podocalyxin isoform 1 precursor [Homo sapiens]
O75955	case2-VS-control	-1.08093	0.0843482	-12.8151	8	1.3e-06	3.14e-05	Down	O75955	Flotillin-1 OS=Homo sapiens OX=9606 GN=FLOT1 PE=1 SV=3	100	0	NP_005794.1	flotillin-1 isoform 1 [Homo sapiens]
Q9NP72	case2-VS-control	-1.30582	0.101903	-12.8143	8	1.3e-06	3.14e-05	Down	Q9NP72	Ras-related protein Rab-18 OS=Homo sapiens OX=9606 GN=RAB18 PE=1 SV=1	100	7e-151	NP_067075.1	ras-related protein Rab-18 isoform 1 [Homo sapiens]
Q14108	case2-VS-control	1.47421	0.115488	12.7651	8	1.34e-06	3.22e-05	Up	Q14108	Lysosome membrane protein 2 OS=Homo sapiens OX=9606 GN=SCARB2 PE=1 SV=2	100	0	NP_005497.1	lysosome membrane protein 2 isoform 1 precursor [Homo sapiens]
Q5JTV8	case2-VS-control	-1.13994	0.0895209	-12.7338	8	1.36e-06	3.27e-05	Down	Q5JTV8	Torsin-1A-interacting protein 1 OS=Homo sapiens OX=9606 GN=TOR1AIP1 PE=1 SV=2	100	0	NP_056417.2	torsin-1A-interacting protein 1 isoform 2 [Homo sapiens]
Q96P11	case2-VS-control	-0.998385	0.0787486	-12.6781	8	1.41e-06	3.34e-05	None	Q96P11	Probable 28S rRNA (cytosine-C(5))-methyltransferase OS=Homo sapiens OX=9606 GN=NSUN5 PE=1 SV=2	100	0	NP_001161819.1	probable 28S rRNA (cytosine-C(5))-methyltransferase isoform 3 [Homo sapiens]
P48681	case2-VS-control	-4.93476	0.329123	-14.9937	7	1.41e-06	3.34e-05	Down	P48681	Nestin OS=Homo sapiens OX=9606 GN=NES PE=1 SV=2	100	0	NP_006608.1	nestin [Homo sapiens]
Q9Y624	case2-VS-control	1.38353	0.109324	12.6553	8	1.43e-06	3.36e-05	Up	Q9Y624	Junctional adhesion molecule A OS=Homo sapiens OX=9606 GN=F11R PE=1 SV=1	100	0	NP_058642.1	junctional adhesion molecule A isoform 1 precursor [Homo sapiens]
Q9H0X4	case2-VS-control	-1.92214	0.151945	-12.6502	8	1.43e-06	3.36e-05	Down	Q9H0X4	Protein FAM234A OS=Homo sapiens OX=9606 GN=FAM234A PE=1 SV=1	100	0	NP_114428.1	protein FAM234A [Homo sapiens]
Q12888	case2-VS-control	-1.95403	0.154551	-12.6432	8	1.44e-06	3.36e-05	Down	Q12888	TP53-binding protein 1 OS=Homo sapiens OX=9606 GN=TP53BP1 PE=1 SV=2	100	0	NP_005648.1	TP53-binding protein 1 isoform 3 [Homo sapiens]
O43719	case2-VS-control	-0.981844	0.0778148	-12.6177	8	1.46e-06	3.4e-05	None	O43719	HIV Tat-specific factor 1 OS=Homo sapiens OX=9606 GN=HTATSF1 PE=1 SV=1	100	0	NP_055315.2	HIV Tat-specific factor 1 [Homo sapiens]
Q96RU2	case2-VS-control	-1.70666	0.11495	-14.8469	7	1.51e-06	3.49e-05	Down	Q96RU2	Ubiquitin carboxyl-terminal hydrolase 28 OS=Homo sapiens OX=9606 GN=USP28 PE=1 SV=1	100	0	NP_065937.1	ubiquitin carboxyl-terminal hydrolase 28 isoform a [Homo sapiens]
Q16850	case2-VS-control	-1.21075	0.096689	-12.5221	8	1.55e-06	3.54e-05	Down	Q16850	Lanosterol 14-alpha demethylase OS=Homo sapiens OX=9606 GN=CYP51A1 PE=1 SV=3	100	0	NP_000777.1	lanosterol 14-alpha demethylase isoform 1 precursor [Homo sapiens]
Q9NVH0	case2-VS-control	1.59684	0.12758	12.5163	8	1.55e-06	3.54e-05	Up	Q9NVH0	Exonuclease 3'-5' domain-containing protein 2 OS=Homo sapiens OX=9606 GN=EXD2 PE=1 SV=2	100	0	NP_001180289.1	exonuclease 3'-5' domain-containing protein 2 isoform 1 [Homo sapiens]
Q8WVC6	case2-VS-control	-2.9638	0.2368	-12.516	8	1.55e-06	3.54e-05	Down	Q8WVC6	Dephospho-CoA kinase domain-containing protein OS=Homo sapiens OX=9606 GN=DCAKD PE=1 SV=1	100	4e-170	NP_079095.3	dephospho-CoA kinase domain-containing protein [Homo sapiens]
P02792	case2-VS-control	4.89334	0.263267	18.587	6	1.56e-06	3.54e-05	Up	P02792	Ferritin light chain OS=Homo sapiens OX=9606 GN=FTL PE=1 SV=2	100	3e-126	CAE11873.1	hypothetical protein, partial [Homo sapiens]
P59998	case2-VS-control	1.26594	0.101327	12.4937	8	1.58e-06	3.54e-05	Up	P59998	Actin-related protein 2/3 complex subunit 4 OS=Homo sapiens OX=9606 GN=ARPC4 PE=1 SV=3	100	1e-119	NP_005709.1	actin-related protein 2/3 complex subunit 4 isoform a [Homo sapiens]
P38117	case2-VS-control	-1.51967	0.121639	-12.4933	8	1.58e-06	3.54e-05	Down	P38117	Electron transfer flavoprotein subunit beta OS=Homo sapiens OX=9606 GN=ETFB PE=1 SV=3	100	0	NP_001976.1	electron transfer flavoprotein subunit beta isoform 1 [Homo sapiens]
Q9Y680	case2-VS-control	-1.97519	0.158664	-12.4489	8	1.62e-06	3.61e-05	Down	Q9Y680	Peptidyl-prolyl cis-trans isomerase FKBP7 OS=Homo sapiens OX=9606 GN=FKBP7 PE=1 SV=2	100	1e-165	NP_851939.1	peptidyl-prolyl cis-trans isomerase FKBP7 isoform a precursor [Homo sapiens]
Q5VWJ9	case2-VS-control	1.78413	0.0965785	18.4734	6	1.62e-06	3.61e-05	Up	Q5VWJ9	Sorting nexin-30 OS=Homo sapiens OX=9606 GN=SNX30 PE=1 SV=1	99.771	0	XP_009186532.1	sorting nexin-30 isoform X1 [Papio anubis]
Q969X5	case2-VS-control	-1.27549	0.103399	-12.3357	8	1.74e-06	3.85e-05	Down	Q969X5	Endoplasmic reticulum-Golgi intermediate compartment protein 1 OS=Homo sapiens OX=9606 GN=ERGIC1 PE=1 SV=1	100	0	NP_001026881.1	endoplasmic reticulum-Golgi intermediate compartment protein 1 [Homo sapiens]
P18031	case2-VS-control	-0.772071	0.0628053	-12.2931	8	1.78e-06	3.92e-05	None	P18031	Tyrosine-protein phosphatase non-receptor type 1 OS=Homo sapiens OX=9606 GN=PTPN1 PE=1 SV=1	100	0	NP_002818.1	tyrosine-protein phosphatase non-receptor type 1 isoform 1 [Homo sapiens]
Q9BTC8	case2-VS-control	-1.43876	0.117057	-12.2911	8	1.79e-06	3.92e-05	Down	Q9BTC8	Metastasis-associated protein MTA3 OS=Homo sapiens OX=9606 GN=MTA3 PE=1 SV=2	100	0	NP_001317371.1	metastasis-associated protein MTA3 isoform c [Homo sapiens]
Q5VWZ2	case2-VS-control	1.64474	0.134428	12.2351	8	1.85e-06	4.04e-05	Up	Q5VWZ2	Lysophospholipase-like protein 1 OS=Homo sapiens OX=9606 GN=LYPLAL1 PE=1 SV=3	100	2e-178	NP_620149.2	lysophospholipase-like protein 1 isoform a [Homo sapiens]
Q9NP81	case2-VS-control	1.2716	0.104131	12.2115	8	1.88e-06	4.08e-05	Up	Q9NP81	Serine--tRNA ligase, mitochondrial OS=Homo sapiens OX=9606 GN=SARS2 PE=1 SV=1	100	0	NP_060297.1	serine--tRNA ligase, mitochondrial isoform b precursor [Homo sapiens]
P60033	case2-VS-control	-2.12245	0.174495	-12.1634	8	1.93e-06	4.18e-05	Down	P60033	CD81 antigen OS=Homo sapiens OX=9606 GN=CD81 PE=1 SV=1	100	5e-172	NP_004347.1	CD81 antigen isoform 1 [Homo sapiens]
P15151	case2-VS-control	0.801841	0.0659997	12.1492	8	1.95e-06	4.2e-05	None	P15151	Poliovirus receptor OS=Homo sapiens OX=9606 GN=PVR PE=1 SV=2	100	0	P15151.2	RecName: Full=Poliovirus receptor; AltName: Full=Nectin-like protein 5; Short=NECL-5; AltName: CD_antigen=CD155; Flags: Precursor
Q8TB96	case2-VS-control	1.99918	0.165272	12.0963	8	2.02e-06	4.32e-05	Up	Q8TB96	T-cell immunomodulatory protein OS=Homo sapiens OX=9606 GN=ITFG1 PE=1 SV=1	100	0	NP_110417.2	T-cell immunomodulatory protein isoform 1 precursor [Homo sapiens]
Q969M3	case2-VS-control	-1.39337	0.11576	-12.0367	8	2.09e-06	4.47e-05	Down	Q969M3	Protein YIPF5 OS=Homo sapiens OX=9606 GN=YIPF5 PE=1 SV=1	100	0	NP_110426.4	protein YIPF5 isoform a [Homo sapiens]
P09110	case2-VS-control	1.31588	0.109467	12.0208	8	2.12e-06	4.49e-05	Up	P09110	3-ketoacyl-CoA thiolase, peroxisomal OS=Homo sapiens OX=9606 GN=ACAA1 PE=1 SV=2	100	0	NP_001598.1	3-ketoacyl-CoA thiolase, peroxisomal isoform a [Homo sapiens]
Q07157	case2-VS-control	1.29916	0.108131	12.0147	8	2.12e-06	4.49e-05	Up	Q07157	Tight junction protein ZO-1 OS=Homo sapiens OX=9606 GN=TJP1 PE=1 SV=3	99.943	0	BAG65513.1	unnamed protein product [Homo sapiens]
O95858	case2-VS-control	1.73053	0.0983852	17.5893	6	2.17e-06	4.56e-05	Up	O95858	Tetraspanin-15 OS=Homo sapiens OX=9606 GN=TSPAN15 PE=1 SV=1	100	0	NP_036471.1	tetraspanin-15 isoform 1 [Homo sapiens]
P07686	case2-VS-control	1.03046	0.0863843	11.9288	8	2.24e-06	4.7e-05	Up	P07686	Beta-hexosaminidase subunit beta OS=Homo sapiens OX=9606 GN=HEXB PE=1 SV=3	100	0	NP_000512.1	beta-hexosaminidase subunit beta isoform 1 preproprotein [Homo sapiens]
Q99567	case2-VS-control	-0.598205	0.0501985	-11.9168	8	2.26e-06	4.71e-05	None	Q99567	Nuclear pore complex protein Nup88 OS=Homo sapiens OX=9606 GN=NUP88 PE=1 SV=2	100	0	NP_002523.2	nuclear pore complex protein Nup88 isoform 2 [Homo sapiens]
O75629	case2-VS-control	1.52348	0.127991	11.903	8	2.28e-06	4.73e-05	Up	O75629	Protein CREG1 OS=Homo sapiens OX=9606 GN=CREG1 PE=1 SV=1	100	8e-163	NP_003842.1	protein CREG1 precursor [Homo sapiens]
Q9H0V9	case2-VS-control	-0.933352	0.0787153	-11.8573	8	2.35e-06	4.85e-05	None	Q9H0V9	VIP36-like protein OS=Homo sapiens OX=9606 GN=LMAN2L PE=1 SV=1	100	0	NP_110432.1	VIP36-like protein isoform 2 precursor [Homo sapiens]
Q13049	case2-VS-control	-1.30289	0.110066	-11.8373	8	2.38e-06	4.89e-05	Down	Q13049	E3 ubiquitin-protein ligase TRIM32 OS=Homo sapiens OX=9606 GN=TRIM32 PE=1 SV=2	100	0	NP_001093149.1	E3 ubiquitin-protein ligase TRIM32 [Homo sapiens]
P01891	case2-VS-control	-1.44204	0.121903	-11.8294	8	2.39e-06	4.9e-05	Down	P01891	HLA class I histocompatibility antigen, A-68 alpha chain OS=Homo sapiens OX=9606 GN=HLA-A PE=1 SV=4	100	0	P01891.4	RecName: Full=HLA class I histocompatibility antigen, A-68 alpha chain; AltName: Full=Aw-68; AltName: Full=HLA class I histocompatibility antigen, A-28 alpha chain; AltName: Full=MHC class I antigen A*68; Flags: Precursor
Q8WXF1	case2-VS-control	1.93901	0.165589	11.7098	8	2.58e-06	5.27e-05	Up	Q8WXF1	Paraspeckle component 1 OS=Homo sapiens OX=9606 GN=PSPC1 PE=1 SV=1	100	0	NP_001035879.1	paraspeckle component 1 isoform 1 [Homo sapiens]
Q05682	case2-VS-control	-2.01552	0.172337	-11.6952	8	2.61e-06	5.29e-05	Down	Q05682	Caldesmon OS=Homo sapiens OX=9606 GN=CALD1 PE=1 SV=3	100	0	NP_149129.2	caldesmon isoform 1 [Homo sapiens]
Q92572	case2-VS-control	5.56578	0.326683	17.0373	6	2.62e-06	5.29e-05	Up	Q92572	AP-3 complex subunit sigma-1 OS=Homo sapiens OX=9606 GN=AP3S1 PE=1 SV=1	100	7e-141	XP_012514992.1	PREDICTED: AP-3 complex subunit sigma-1 [Propithecus coquereli]
Q9UH17	case2-VS-control	2.30513	0.197959	11.6445	8	2.7e-06	5.42e-05	Up	Q9UH17	DNA dC->dU-editing enzyme APOBEC-3B OS=Homo sapiens OX=9606 GN=APOBEC3B PE=1 SV=1	100	0	Q9UH17.1	RecName: Full=DNA dC-
P21964	case2-VS-control	-1.50683	0.129486	-11.637	8	2.71e-06	5.43e-05	Down	P21964	Catechol O-methyltransferase OS=Homo sapiens OX=9606 GN=COMT PE=1 SV=2	100	0	NP_000745.1	catechol O-methyltransferase isoform MB-COMT [Homo sapiens]
P48960	case2-VS-control	0.869106	0.0748184	11.6162	8	2.75e-06	5.45e-05	None	P48960	CD97 antigen OS=Homo sapiens OX=9606 GN=CD97 PE=1 SV=4	100	0	NP_510966.1	CD97 antigen isoform 1 preproprotein [Homo sapiens]
Q9NZ08	case2-VS-control	-1.50087	0.129277	-11.6098	8	2.76e-06	5.45e-05	Down	Q9NZ08	Endoplasmic reticulum aminopeptidase 1 OS=Homo sapiens OX=9606 GN=ERAP1 PE=1 SV=3	100	0	NP_001035548.1	endoplasmic reticulum aminopeptidase 1 isoform b precursor [Homo sapiens]
O43464	case2-VS-control	-1.65363	0.142439	-11.6094	8	2.76e-06	5.45e-05	Down	O43464	Serine protease HTRA2, mitochondrial OS=Homo sapiens OX=9606 GN=HTRA2 PE=1 SV=2	100	0	NP_037379.1	serine protease HTRA2, mitochondrial isoform 1 preproprotein [Homo sapiens]
Q9NX18	case2-VS-control	-3.69914	0.320059	-11.5577	8	2.85e-06	5.6e-05	Down	Q9NX18	Succinate dehydrogenase assembly factor 2, mitochondrial OS=Homo sapiens OX=9606 GN=SDHAF2 PE=1 SV=1	100	2e-119	NP_060311.1	succinate dehydrogenase assembly factor 2, mitochondrial [Homo sapiens]
Q08379	case2-VS-control	-1.33112	0.115196	-11.5553	8	2.86e-06	5.6e-05	Down	Q08379	Golgin subfamily A member 2 OS=Homo sapiens OX=9606 GN=GOLGA2 PE=1 SV=3	100	0	NP_004477.3	golgin subfamily A member 2 [Homo sapiens]
P54709	case2-VS-control	-1.31061	0.113527	-11.5444	8	2.88e-06	5.6e-05	Down	P54709	Sodium/potassium-transporting ATPase subunit beta-3 OS=Homo sapiens OX=9606 GN=ATP1B3 PE=1 SV=1	100	0	NP_001670.1	sodium/potassium-transporting ATPase subunit beta-3 [Homo sapiens]
Q14651	case2-VS-control	3.76841	0.224821	16.7618	6	2.88e-06	5.6e-05	Up	Q14651	Plastin-1 OS=Homo sapiens OX=9606 GN=PLS1 PE=1 SV=2	100	0	NP_002661.2	plastin-1 [Homo sapiens]
Q9H9L3	case2-VS-control	0.627279	0.0548848	11.429	8	3.11e-06	6.01e-05	None	Q9H9L3	Interferon-stimulated 20 kDa exonuclease-like 2 OS=Homo sapiens OX=9606 GN=ISG20L2 PE=1 SV=1	100	0	NP_001290024.1	interferon-stimulated 20 kDa exonuclease-like 2 [Homo sapiens]
Q8WUY8	case2-VS-control	1.87316	0.164435	11.3915	8	3.18e-06	6.14e-05	Up	Q8WUY8	N-acetyltransferase 14 OS=Homo sapiens OX=9606 GN=NAT14 PE=1 SV=1	100	1e-139	NP_065111.1	N-acetyltransferase 14 [Homo sapiens]
O95208	case2-VS-control	-1.33733	0.11805	-11.3285	8	3.32e-06	6.38e-05	Down	O95208	Epsin-2 OS=Homo sapiens OX=9606 GN=EPN2 PE=1 SV=3	100	0	NP_055779.2	epsin-2 isoform b [Homo sapiens]
O00429	case2-VS-control	1.72934	0.152987	11.3038	8	3.38e-06	6.45e-05	Up	O00429	Dynamin-1-like protein OS=Homo sapiens OX=9606 GN=DNM1L PE=1 SV=2	100	0	NP_036192.2	dynamin-1-like protein isoform 1 [Homo sapiens]
Q9NZM5	case2-VS-control	1.71782	0.152021	11.2999	8	3.39e-06	6.45e-05	Up	Q9NZM5	Ribosome biogenesis protein NOP53 OS=Homo sapiens OX=9606 GN=NOP53 PE=1 SV=2	100	0	NP_056525.2	ribosome biogenesis protein NOP53 [Homo sapiens]
Q9GZY8	case2-VS-control	0.966011	0.0857492	11.2655	8	3.46e-06	6.57e-05	None	Q9GZY8	Mitochondrial fission factor OS=Homo sapiens OX=9606 GN=MFF PE=1 SV=1	100	0	NP_064579.3	mitochondrial fission factor isoform a [Homo sapiens]
P32004	case2-VS-control	-1.03962	0.092334	-11.2594	8	3.48e-06	6.57e-05	Down	P32004	Neural cell adhesion molecule L1 OS=Homo sapiens OX=9606 GN=L1CAM PE=1 SV=2	100	0	NP_000416.1	neural cell adhesion molecule L1 isoform 1 precursor [Homo sapiens]
P08621	case2-VS-control	-0.698229	0.0621006	-11.2435	8	3.52e-06	6.59e-05	None	P08621	U1 small nuclear ribonucleoprotein 70 kDa OS=Homo sapiens OX=9606 GN=SNRNP70 PE=1 SV=2	100	0	NP_003080.2	U1 small nuclear ribonucleoprotein 70 kDa isoform 1 [Homo sapiens]
O15511	case2-VS-control	1.23577	0.10994	11.2404	8	3.52e-06	6.59e-05	Up	O15511	Actin-related protein 2/3 complex subunit 5 OS=Homo sapiens OX=9606 GN=ARPC5 PE=1 SV=3	100	2e-107	NP_005708.1	actin-related protein 2/3 complex subunit 5 isoform 1 [Homo sapiens]
Q16706	case2-VS-control	1.18279	0.10525	11.238	8	3.53e-06	6.59e-05	Up	Q16706	Alpha-mannosidase 2 OS=Homo sapiens OX=9606 GN=MAN2A1 PE=1 SV=2	100	0	NP_002363.2	alpha-mannosidase 2 [Homo sapiens]
Q07065	case2-VS-control	-1.41879	0.126458	-11.2195	8	3.57e-06	6.64e-05	Down	Q07065	Cytoskeleton-associated protein 4 OS=Homo sapiens OX=9606 GN=CKAP4 PE=1 SV=2	100	0	NP_006816.2	cytoskeleton-associated protein 4 [Homo sapiens]
P0DMV8	case2-VS-control	-1.01306	0.0903796	-11.2089	8	3.6e-06	6.66e-05	Down	P0DMV8;P0DMV9	Heat shock 70 kDa protein 1A OS=Homo sapiens OX=9606 GN=HSPA1A PE=1 SV=1	100	0	NP_005337.2	heat shock 70 kDa protein 1B [Homo sapiens]
P98194	case2-VS-control	1.36524	0.122271	11.1657	8	3.71e-06	6.8e-05	Up	P98194	Calcium-transporting ATPase type 2C member 1 OS=Homo sapiens OX=9606 GN=ATP2C1 PE=1 SV=3	100	0	NP_055197.2	calcium-transporting ATPase type 2C member 1 isoform 1a [Homo sapiens]
Q8IY26	case2-VS-control	2.00616	0.179787	11.1585	8	3.72e-06	6.8e-05	Up	Q8IY26	Phospholipid phosphatase 6 OS=Homo sapiens OX=9606 GN=PLPP6 PE=1 SV=3	100	0	NP_982278.3	phospholipid phosphatase 6 [Homo sapiens]
P16278	case2-VS-control	1.19148	0.106781	11.1582	8	3.72e-06	6.8e-05	Up	P16278	Beta-galactosidase OS=Homo sapiens OX=9606 GN=GLB1 PE=1 SV=2	100	0	NP_000395.2	beta-galactosidase isoform a preproprotein [Homo sapiens]
O94973	case2-VS-control	-1.09677	0.098316	-11.1555	8	3.73e-06	6.8e-05	Down	O94973	AP-2 complex subunit alpha-2 OS=Homo sapiens OX=9606 GN=AP2A2 PE=1 SV=2	100	0	NP_036437.1	AP-2 complex subunit alpha-2 isoform 2 [Homo sapiens]
Q5JS37	case2-VS-control	2.49326	0.11439	21.7962	5	3.77e-06	6.85e-05	Up	Q5JS37	NHL repeat-containing protein 3 OS=Homo sapiens OX=9606 GN=NHLRC3 PE=2 SV=1	100	0	NP_001012772.1	NHL repeat-containing protein 3 isoform a precursor [Homo sapiens]
P63092	case2-VS-control	-0.904794	0.0813023	-11.1288	8	3.8e-06	6.87e-05	None	P63092;Q5JWF2	Guanine nucleotide-binding protein G(s) subunit alpha isoforms short OS=Homo sapiens OX=9606 GN=GNAS PE=1 SV=1	100	0	NP_000507.1	protein GNAS isoform GNASL [Homo sapiens]
O43826	case2-VS-control	-1.81909	0.163654	-11.1155	8	3.83e-06	6.88e-05	Down	O43826	Glucose-6-phosphate exchanger SLC37A4 OS=Homo sapiens OX=9606 GN=SLC37A4 PE=1 SV=1	100	0	NP_001458.1	glucose-6-phosphate exchanger SLC37A4 isoform 1 [Homo sapiens]
P51571	case2-VS-control	0.774101	0.0696486	11.1144	8	3.84e-06	6.88e-05	None	P51571	Translocon-associated protein subunit delta OS=Homo sapiens OX=9606 GN=SSR4 PE=1 SV=1	100	6e-127	XP_016800049.1	PREDICTED: translocon-associated protein subunit delta isoform X1 [Pan troglodytes]
Q92917	case2-VS-control	-1.01776	0.0918231	-11.084	8	3.92e-06	6.97e-05	Down	Q92917	G-patch domain and KOW motifs-containing protein OS=Homo sapiens OX=9606 GN=GPKOW PE=1 SV=2	100	0	XP_016884904.1	PREDICTED: G patch domain and KOW motifs-containing protein isoform X1 [Homo sapiens]
Q13263	case2-VS-control	0.977869	0.0882488	11.0808	8	3.93e-06	6.97e-05	None	Q13263	Transcription intermediary factor 1-beta OS=Homo sapiens OX=9606 GN=TRIM28 PE=1 SV=5	100	0	NP_005753.1	transcription intermediary factor 1-beta [Homo sapiens]
P08727	case2-VS-control	2.02703	0.182967	11.0786	8	3.93e-06	6.97e-05	Up	P08727	Keratin, type I cytoskeletal 19 OS=Homo sapiens OX=9606 GN=KRT19 PE=1 SV=4	100	0	NP_002267.2	keratin, type I cytoskeletal 19 [Homo sapiens]
Q9P2W9	case2-VS-control	1.22355	0.110623	11.0606	8	3.98e-06	7.03e-05	Up	Q9P2W9	Syntaxin-18 OS=Homo sapiens OX=9606 GN=STX18 PE=1 SV=1	100	0	NP_058626.1	syntaxin-18 isoform 1 [Homo sapiens]
Q86X29	case2-VS-control	3.48764	0.162475	21.4658	5	4.07e-06	7.16e-05	Up	Q86X29	Lipolysis-stimulated lipoprotein receptor OS=Homo sapiens OX=9606 GN=LSR PE=1 SV=4	100	0	NP_991403.1	lipolysis-stimulated lipoprotein receptor isoform 2 [Homo sapiens]
P04066	case2-VS-control	1.4102	0.128236	10.9969	8	4.16e-06	7.29e-05	Up	P04066	Tissue alpha-L-fucosidase OS=Homo sapiens OX=9606 GN=FUCA1 PE=1 SV=4	100	0	NP_000138.2	tissue alpha-L-fucosidase precursor [Homo sapiens]
Q8IUD2	case2-VS-control	-1.20805	0.110088	-10.9735	8	4.22e-06	7.38e-05	Down	Q8IUD2	ELKS/Rab6-interacting/CAST family member 1 OS=Homo sapiens OX=9606 GN=ERC1 PE=1 SV=1	100	0	NP_829884.1	ELKS/Rab6-interacting/CAST family member 1 isoform epsilon [Homo sapiens]
Q9BTT6	case2-VS-control	0.966459	0.0882012	10.9574	8	4.27e-06	7.42e-05	None	Q9BTT6	Leucine-rich repeat-containing protein 1 OS=Homo sapiens OX=9606 GN=LRRC1 PE=1 SV=1	100	0	NP_060684.4	leucine-rich repeat-containing protein 1 [Homo sapiens]
Q6KB66	case2-VS-control	2.23343	0.203876	10.9548	8	4.28e-06	7.42e-05	Up	Q6KB66	Keratin, type II cytoskeletal 80 OS=Homo sapiens OX=9606 GN=KRT80 PE=1 SV=2	100	0	NP_872313.2	keratin, type II cytoskeletal 80 isoform K80 [Homo sapiens]
P26885	case2-VS-control	-0.816454	0.0748012	-10.915	8	4.4e-06	7.6e-05	None	P26885	Peptidyl-prolyl cis-trans isomerase FKBP2 OS=Homo sapiens OX=9606 GN=FKBP2 PE=1 SV=2	100	8e-100	NP_004461.2	peptidyl-prolyl cis-trans isomerase FKBP2 precursor [Homo sapiens]
P09972	case2-VS-control	-3.61853	0.331804	-10.9056	8	4.43e-06	7.62e-05	Down	P09972	Fructose-bisphosphate aldolase C OS=Homo sapiens OX=9606 GN=ALDOC PE=1 SV=2	100	0	NP_005156.1	fructose-bisphosphate aldolase C [Homo sapiens]
Q9H3G5	case2-VS-control	3.81845	0.112318	33.9969	4	4.47e-06	7.65e-05	Up	Q9H3G5	Probable serine carboxypeptidase CPVL OS=Homo sapiens OX=9606 GN=CPVL PE=1 SV=2	100	0	NP_112601.3	probable serine carboxypeptidase CPVL precursor [Homo sapiens]
P54886	case2-VS-control	-1.26204	0.116439	-10.8387	8	4.64e-06	7.92e-05	Down	P54886	Delta-1-pyrroline-5-carboxylate synthase OS=Homo sapiens OX=9606 GN=ALDH18A1 PE=1 SV=2	100	0	NP_002851.2	delta-1-pyrroline-5-carboxylate synthase isoform 1 [Homo sapiens]
Q9ULV4	case2-VS-control	-0.986729	0.091565	-10.7763	8	4.84e-06	8.24e-05	None	Q9ULV4	Coronin-1C OS=Homo sapiens OX=9606 GN=CORO1C PE=1 SV=1	100	0	CAO94662.1	Coronin-1C_i2 protein [Homo sapiens]
P49257	case2-VS-control	-1.31334	0.122015	-10.7637	8	4.89e-06	8.29e-05	Down	P49257	Protein ERGIC-53 OS=Homo sapiens OX=9606 GN=LMAN1 PE=1 SV=2	100	0	NP_005561.1	protein ERGIC-53 precursor [Homo sapiens]
Q9UBB5	case2-VS-control	-4.59543	0.427145	-10.7585	8	4.91e-06	8.29e-05	Down	Q9UBB5	Methyl-CpG-binding domain protein 2 OS=Homo sapiens OX=9606 GN=MBD2 PE=1 SV=1	100	0	NP_003918.1	methyl-CpG-binding domain protein 2 isoform 1 [Homo sapiens]
Q9HB19	case2-VS-control	-1.53052	0.142711	-10.7246	8	5.02e-06	8.43e-05	Down	Q9HB19	Pleckstrin homology domain-containing family A member 2 OS=Homo sapiens OX=9606 GN=PLEKHA2 PE=1 SV=2	100	0	Q9HB19.2	RecName: Full=Pleckstrin homology domain-containing family A member 2; Short=PH domain-containing family A member 2; AltName: Full=Tandem PH domain-containing protein 2; Short=TAPP-2
Q13428	case2-VS-control	-1.65779	0.154591	-10.7237	8	5.03e-06	8.43e-05	Down	Q13428	Treacle protein OS=Homo sapiens OX=9606 GN=TCOF1 PE=1 SV=3	100	0	NP_001128715.1	treacle protein isoform d [Homo sapiens]
Q9NPF4	case2-VS-control	1.7318	0.139702	12.3963	7	5.11e-06	8.54e-05	Up	Q9NPF4	Probable tRNA N6-adenosine threonylcarbamoyltransferase OS=Homo sapiens OX=9606 GN=OSGEP PE=1 SV=1	100	0	NP_060277.1	probable tRNA N6-adenosine threonylcarbamoyltransferase [Homo sapiens]
Q04721	case2-VS-control	-1.51055	0.14141	-10.6821	8	5.18e-06	8.62e-05	Down	Q04721	Neurogenic locus notch homolog protein 2 OS=Homo sapiens OX=9606 GN=NOTCH2 PE=1 SV=3	100	0	NP_077719.2	neurogenic locus notch homolog protein 2 isoform 1 preproprotein [Homo sapiens]
P20933	case2-VS-control	2.0042	0.188345	10.6411	8	5.33e-06	8.84e-05	Up	P20933	N(4)-(beta-N-acetylglucosaminyl)-L-asparaginase OS=Homo sapiens OX=9606 GN=AGA PE=1 SV=2	100	0	NP_000018.2	N(4)-(beta-N-acetylglucosaminyl)-L-asparaginase isoform 1 preproprotein [Homo sapiens]
P62253	case2-VS-control	2.53076	0.205951	12.2882	7	5.42e-06	8.96e-05	Up	P62253	Ubiquitin-conjugating enzyme E2 G1 OS=Homo sapiens OX=9606 GN=UBE2G1 PE=1 SV=3	100	1e-124	XP_004716250.1	PREDICTED: LOW QUALITY PROTEIN: ubiquitin-conjugating enzyme E2 G1 [Echinops telfairi]
Q9H875	case2-VS-control	0.937432	0.0883442	10.6111	8	5.44e-06	8.96e-05	None	Q9H875	PRKR-interacting protein 1 OS=Homo sapiens OX=9606 GN=PRKRIP1 PE=1 SV=1	100	1e-128	NP_078929.1	PRKR-interacting protein 1 [Homo sapiens]
P00390	case2-VS-control	0.86561	0.0816208	10.6053	8	5.46e-06	8.97e-05	None	P00390	Glutathione reductase, mitochondrial OS=Homo sapiens OX=9606 GN=GSR PE=1 SV=2	100	0	NP_000628.2	glutathione reductase, mitochondrial isoform 1 precursor [Homo sapiens]
Q96PK6	case2-VS-control	1.35932	0.128419	10.585	8	5.54e-06	9.04e-05	Up	Q96PK6	RNA-binding protein 14 OS=Homo sapiens OX=9606 GN=RBM14 PE=1 SV=2	100	0	NP_006319.1	RNA-binding protein 14 isoform 1 [Homo sapiens]
P19367	case2-VS-control	-2.92517	0.276497	-10.5794	8	5.57e-06	9.04e-05	Down	P19367	Hexokinase-1 OS=Homo sapiens OX=9606 GN=HK1 PE=1 SV=3	100	0	NP_000179.2	hexokinase-1 isoform HKI [Homo sapiens]
Q00796	case2-VS-control	2.152	0.203427	10.5787	8	5.57e-06	9.04e-05	Up	Q00796	Sorbitol dehydrogenase OS=Homo sapiens OX=9606 GN=SORD PE=1 SV=4	100	0	NP_003095.2	sorbitol dehydrogenase [Homo sapiens]
P15336	case2-VS-control	-1.66194	0.15774	-10.5359	8	5.74e-06	9.29e-05	Down	P15336	Cyclic AMP-dependent transcription factor ATF-2 OS=Homo sapiens OX=9606 GN=ATF2 PE=1 SV=4	100	0	NP_001871.2	cyclic AMP-dependent transcription factor ATF-2 isoform 1 [Homo sapiens]
Q9UL26	case2-VS-control	-2.57777	0.244875	-10.5269	8	5.78e-06	9.32e-05	Down	Q9UL26	Ras-related protein Rab-22A OS=Homo sapiens OX=9606 GN=RAB22A PE=1 SV=2	100	3e-144	NP_065724.1	ras-related protein Rab-22A [Homo sapiens]
Q9UBI6	case2-VS-control	-1.47372	0.140123	-10.5173	8	5.82e-06	9.35e-05	Down	Q9UBI6	Guanine nucleotide-binding protein G(I)/G(S)/G(O) subunit gamma-12 OS=Homo sapiens OX=9606 GN=GNG12 PE=1 SV=3	100	4e-46	NP_061329.3	guanine nucleotide-binding protein G(I)/G(S)/G(O) subunit gamma-12 precursor [Homo sapiens]
Q99959	case2-VS-control	1.49657	0.100754	14.8537	6	5.86e-06	9.37e-05	Up	Q99959	Plakophilin-2 OS=Homo sapiens OX=9606 GN=PKP2 PE=1 SV=2	100	0	NP_004563.2	plakophilin-2 isoform 2b [Homo sapiens]
Q9H1P3	case2-VS-control	3.02135	0.203477	14.8486	6	5.87e-06	9.37e-05	Up	Q9H1P3	Oxysterol-binding protein-related protein 2 OS=Homo sapiens OX=9606 GN=OSBPL2 PE=1 SV=1	100	0	NP_653081.1	oxysterol-binding protein-related protein 2 isoform 2 [Homo sapiens]
P63027	case2-VS-control	-0.843803	0.0803975	-10.4954	8	5.91e-06	9.4e-05	None	P63027	Vesicle-associated membrane protein 2 OS=Homo sapiens OX=9606 GN=VAMP2 PE=1 SV=3	100	5e-80	NP_001027992.1	vesicle-associated membrane protein 2 [Macaca mulatta]
P43307	case2-VS-control	0.933268	0.0890692	10.478	8	5.98e-06	9.47e-05	None	P43307	Translocon-associated protein subunit alpha OS=Homo sapiens OX=9606 GN=SSR1 PE=1 SV=3	100	0	NP_003135.2	translocon-associated protein subunit alpha isoform 1 precursor [Homo sapiens]
P98175	case2-VS-control	-0.810427	0.077369	-10.4748	8	6e-06	9.47e-05	None	P98175	RNA-binding protein 10 OS=Homo sapiens OX=9606 GN=RBM10 PE=1 SV=3	100	0	NP_005667.2	RNA-binding protein 10 isoform 1 [Homo sapiens]
Q92544	case2-VS-control	0.804745	0.0770966	10.4381	8	6.16e-06	9.69e-05	None	Q92544	Transmembrane 9 superfamily member 4 OS=Homo sapiens OX=9606 GN=TM9SF4 PE=1 SV=2	99.844	0	XP_017370106.1	PREDICTED: transmembrane 9 superfamily member 4 isoform X1 [Cebus capucinus imitator]
P35232	case2-VS-control	0.898	0.0862885	10.407	8	6.3e-06	9.88e-05	None	P35232	Prohibitin OS=Homo sapiens OX=9606 GN=PHB PE=1 SV=1	100	0	NP_002625.1	prohibitin isoform 1 [Homo sapiens]
P23284	case2-VS-control	0.424489	0.0409101	10.3761	8	6.44e-06	0.000100671	None	P23284	Peptidyl-prolyl cis-trans isomerase B OS=Homo sapiens OX=9606 GN=PPIB PE=1 SV=2	100	8e-155	NP_000933.1	peptidyl-prolyl cis-trans isomerase B precursor [Homo sapiens]
Q9ULC5	case2-VS-control	4.53278	0.146418	30.9578	4	6.49e-06	0.000100942	Up	Q9ULC5	Long-chain-fatty-acid--CoA ligase 5 OS=Homo sapiens OX=9606 GN=ACSL5 PE=1 SV=1	100	0	NP_976313.1	long-chain-fatty-acid--CoA ligase 5 isoform b [Homo sapiens]
P62879	case2-VS-control	-1.52312	0.146975	-10.3631	8	6.5e-06	0.000100942	Down	P62879	Guanine nucleotide-binding protein G(I)/G(S)/G(T) subunit beta-2 OS=Homo sapiens OX=9606 GN=GNB2 PE=1 SV=3	100	0	NP_034442.1	guanine nucleotide-binding protein G(I)/G(S)/G(T) subunit beta-2 [Mus musculus]
P42892	case2-VS-control	-2.25329	0.217553	-10.3574	8	6.53e-06	0.000101022	Down	P42892	Endothelin-converting enzyme 1 OS=Homo sapiens OX=9606 GN=ECE1 PE=1 SV=2	100	0	NP_001388.1	endothelin-converting enzyme 1 isoform 1 [Homo sapiens]
Q8TD43	case2-VS-control	2.10437	0.0687193	30.6226	4	6.77e-06	0.000104184	Up	Q8TD43	Transient receptor potential cation channel subfamily M member 4 OS=Homo sapiens OX=9606 GN=TRPM4 PE=1 SV=1	100	0	NP_060106.2	transient receptor potential cation channel subfamily M member 4 isoform 1 [Homo sapiens]
Q06210	case2-VS-control	2.06392	0.200269	10.3057	8	6.78e-06	0.000104184	Up	Q06210	Glutamine--fructose-6-phosphate aminotransferase [isomerizing] 1 OS=Homo sapiens OX=9606 GN=GFPT1 PE=1 SV=3	100	0	NP_001231639.1	glutamine--fructose-6-phosphate aminotransferase [isomerizing] 1 isoform 1 [Homo sapiens]
P07339	case2-VS-control	1.00435	0.0975225	10.2987	8	6.81e-06	0.000104376	Up	P07339	Cathepsin D OS=Homo sapiens OX=9606 GN=CTSD PE=1 SV=1	100	0	NP_001900.1	cathepsin D preproprotein [Homo sapiens]
Q9H488	case2-VS-control	-1.06117	0.103191	-10.2835	8	6.89e-06	0.000104993	Down	Q9H488	GDP-fucose protein O-fucosyltransferase 1 OS=Homo sapiens OX=9606 GN=POFUT1 PE=1 SV=1	100	0	NP_056167.1	GDP-fucose protein O-fucosyltransferase 1 isoform 1 precursor [Homo sapiens]
P50281	case2-VS-control	-1.45969	0.10105	-14.4452	6	6.9e-06	0.000104993	Down	P50281	Matrix metalloproteinase-14 OS=Homo sapiens OX=9606 GN=MMP14 PE=1 SV=3	100	0	NP_004986.1	matrix metalloproteinase-14 preproprotein [Homo sapiens]
O15270	case2-VS-control	1.015	0.098897	10.2632	8	6.99e-06	0.000106052	Up	O15270	Serine palmitoyltransferase 2 OS=Homo sapiens OX=9606 GN=SPTLC2 PE=1 SV=1	100	0	NP_004854.1	serine palmitoyltransferase 2 [Homo sapiens]
Q70J99	case2-VS-control	4.48326	0.380409	11.7853	7	7.18e-06	0.000108538	Up	Q70J99	Protein unc-13 homolog D OS=Homo sapiens OX=9606 GN=UNC13D PE=1 SV=1	100	0	NP_954712.1	protein unc-13 homolog D [Homo sapiens]
Q8N0U8	case2-VS-control	-0.842622	0.0825005	-10.2135	8	7.25e-06	0.000109053	None	Q8N0U8	Vitamin K epoxide reductase complex subunit 1-like protein 1 OS=Homo sapiens OX=9606 GN=VKORC1L1 PE=1 SV=2	100	8e-126	XP_527770.3	PREDICTED: vitamin K epoxide reductase complex subunit 1-like protein 1 isoform X2 [Pan troglodytes]
Q13451	case2-VS-control	-1.46577	0.124596	-11.7642	7	7.26e-06	0.000109053	Down	Q13451	Peptidyl-prolyl cis-trans isomerase FKBP5 OS=Homo sapiens OX=9606 GN=FKBP5 PE=1 SV=2	100	0	NP_004108.1	peptidyl-prolyl cis-trans isomerase FKBP5 isoform 1 [Homo sapiens]
Q14011	case2-VS-control	1.26735	0.124162	10.2073	8	7.28e-06	0.000109053	Up	Q14011	Cold-inducible RNA-binding protein OS=Homo sapiens OX=9606 GN=CIRBP PE=1 SV=1	100	3e-114	XP_011747270.1	PREDICTED: cold-inducible RNA-binding protein isoform X1 [Macaca nemestrina]
Q13547	case2-VS-control	-0.865605	0.0851037	-10.1712	8	7.48e-06	0.00011132	None	Q13547	Histone deacetylase 1 OS=Homo sapiens OX=9606 GN=HDAC1 PE=1 SV=1	100	0	NP_004955.2	histone deacetylase 1 [Homo sapiens]
Q8IWZ8	case2-VS-control	1.34397	0.132144	10.1705	8	7.48e-06	0.00011132	Up	Q8IWZ8	SURP and G-patch domain-containing protein 1 OS=Homo sapiens OX=9606 GN=SUGP1 PE=1 SV=2	100	0	NP_757386.2	SURP and G-patch domain-containing protein 1 [Homo sapiens]
O15228	case2-VS-control	1.87364	0.184399	10.1608	8	7.53e-06	0.000111757	Up	O15228	Dihydroxyacetone phosphate acyltransferase OS=Homo sapiens OX=9606 GN=GNPAT PE=1 SV=1	100	0	NP_055051.1	dihydroxyacetone phosphate acyltransferase isoform 1 [Homo sapiens]
Q9GZT9	case2-VS-control	1.29466	0.127858	10.1257	8	7.73e-06	0.000114317	Up	Q9GZT9	Egl nine homolog 1 OS=Homo sapiens OX=9606 GN=EGLN1 PE=1 SV=1	100	0	NP_071334.1	egl nine homolog 1 [Homo sapiens]
P20700	case2-VS-control	-1.2887	0.127347	-10.1196	8	7.77e-06	0.000114475	Down	P20700	Lamin-B1 OS=Homo sapiens OX=9606 GN=LMNB1 PE=1 SV=2	99.829	0	XP_004042476.1	PREDICTED: lamin-B1 [Gorilla gorilla gorilla]
Q13795	case2-VS-control	1.70082	0.16818	10.1131	8	7.8e-06	0.000114656	Up	Q13795	ADP-ribosylation factor-related protein 1 OS=Homo sapiens OX=9606 GN=ARFRP1 PE=1 SV=1	100	7e-149	NP_003215.1	ADP-ribosylation factor-related protein 1 isoform a [Homo sapiens]
O14617	case2-VS-control	2.36041	0.233612	10.104	8	7.86e-06	0.000115069	Up	O14617	AP-3 complex subunit delta-1 OS=Homo sapiens OX=9606 GN=AP3D1 PE=1 SV=1	100	0	NP_003929.4	AP-3 complex subunit delta-1 isoform 2 [Homo sapiens]
Q9UNN8	case2-VS-control	-1.1802	0.117272	-10.0638	8	8.09e-06	0.00011817	Down	Q9UNN8	Endothelial protein C receptor OS=Homo sapiens OX=9606 GN=PROCR PE=1 SV=1	100	8e-176	NP_006395.2	endothelial protein C receptor precursor [Homo sapiens]
O15294	case2-VS-control	0.621173	0.0618927	10.0363	8	8.26e-06	0.000120235	None	O15294	UDP-N-acetylglucosamine--peptide N-acetylglucosaminyltransferase 110 kDa subunit OS=Homo sapiens OX=9606 GN=OGT PE=1 SV=3	100	0	NP_858058.1	UDP-N-acetylglucosamine--peptide N-acetylglucosaminyltransferase 110 kDa subunit isoform 1 [Homo sapiens]
Q9BTD8	case2-VS-control	0.734877	0.0737096	9.9699	8	8.68e-06	0.000125948	None	Q9BTD8	RNA-binding protein 42 OS=Homo sapiens OX=9606 GN=RBM42 PE=1 SV=1	100	0	NP_077297.2	RNA-binding protein 42 isoform 1 [Homo sapiens]
Q7Z4W1	case2-VS-control	0.981838	0.0985666	9.96116	8	8.74e-06	0.000126378	None	Q7Z4W1	L-xylulose reductase OS=Homo sapiens OX=9606 GN=DCXR PE=1 SV=2	100	2e-178	NP_057370.1	L-xylulose reductase isoform 1 [Homo sapiens]
P49447	case2-VS-control	2.83231	0.15427	18.3594	5	8.82e-06	0.000127113	Up	P49447	Cytochrome b561 OS=Homo sapiens OX=9606 GN=CYB561 PE=1 SV=2	100	0	NP_001317350.1	cytochrome b561 isoform 2 [Homo sapiens]
Q9H2U2	case2-VS-control	1.17346	0.118094	9.93658	8	8.9e-06	0.00012793	Up	Q9H2U2	Inorganic pyrophosphatase 2, mitochondrial OS=Homo sapiens OX=9606 GN=PPA2 PE=1 SV=2	100	0	NP_789845.1	inorganic pyrophosphatase 2, mitochondrial isoform 1 precursor [Homo sapiens]
P53582	case2-VS-control	1.21649	0.122503	9.93032	8	8.94e-06	0.000128135	Up	P53582	Methionine aminopeptidase 1 OS=Homo sapiens OX=9606 GN=METAP1 PE=1 SV=2	100	0	NP_055958.2	methionine aminopeptidase 1 [Homo sapiens]
Q9BVC6	case2-VS-control	-1.0119	0.102019	-9.91878	8	9.02e-06	0.000128852	Down	Q9BVC6	Transmembrane protein 109 OS=Homo sapiens OX=9606 GN=TMEM109 PE=1 SV=1	100	3e-166	NP_076997.1	transmembrane protein 109 precursor [Homo sapiens]
Q15067	case2-VS-control	0.726071	0.0733646	9.89674	8	9.17e-06	0.000130604	None	Q15067	Peroxisomal acyl-coenzyme A oxidase 1 OS=Homo sapiens OX=9606 GN=ACOX1 PE=1 SV=3	100	0	NP_009223.2	peroxisomal acyl-coenzyme A oxidase 1 isoform b [Homo sapiens]
P00167	case2-VS-control	-2.05245	0.207517	-9.89052	8	9.21e-06	0.000130815	Down	P00167	Cytochrome b5 OS=Homo sapiens OX=9606 GN=CYB5A PE=1 SV=2	100	7e-96	NP_683725.1	cytochrome b5 isoform 1 [Homo sapiens]
P30566	case2-VS-control	-1.54773	0.156635	-9.88113	8	9.28e-06	0.000131342	Down	P30566	Adenylosuccinate lyase OS=Homo sapiens OX=9606 GN=ADSL PE=1 SV=2	100	0	NP_000017.1	adenylosuccinate lyase isoform a [Homo sapiens]
O43491	case2-VS-control	-1.40117	0.142331	-9.84442	8	9.54e-06	0.000134323	Down	O43491	Band 4.1-like protein 2 OS=Homo sapiens OX=9606 GN=EPB41L2 PE=1 SV=1	100	0	NP_001422.1	band 4.1-like protein 2 isoform a [Homo sapiens]
Q6YN16	case2-VS-control	-1.05012	0.106683	-9.84335	8	9.55e-06	0.000134323	Down	Q6YN16	Hydroxysteroid dehydrogenase-like protein 2 OS=Homo sapiens OX=9606 GN=HSDL2 PE=1 SV=1	100	0	NP_115679.2	hydroxysteroid dehydrogenase-like protein 2 isoform 1 [Homo sapiens]
Q99623	case2-VS-control	0.984153	0.100128	9.82892	8	9.65e-06	0.000135388	None	Q99623	Prohibitin-2 OS=Homo sapiens OX=9606 GN=PHB2 PE=1 SV=2	100	0	NP_031557.2	prohibitin-2 [Mus musculus]
Q9NRA2	case2-VS-control	4.46193	0.0733863	60.8006	3	9.8e-06	0.000137053	Up	Q9NRA2	Sialin OS=Homo sapiens OX=9606 GN=SLC17A5 PE=1 SV=2	100	0	AAF97769.1	membrane glycoprotein HP59 [Homo sapiens]
Q96A72	case2-VS-control	0.608554	0.0620814	9.80252	8	9.85e-06	0.000137296	None	Q96A72	Protein mago nashi homolog 2 OS=Homo sapiens OX=9606 GN=MAGOHB PE=1 SV=1	100	7e-106	NP_060518.1	protein mago nashi homolog 2 isoform 1 [Homo sapiens]
P02794	case2-VS-control	2.85759	0.254876	11.2117	7	1e-05	0.000138827	Up	P02794	Ferritin heavy chain OS=Homo sapiens OX=9606 GN=FTH1 PE=1 SV=2	99.454	2e-136	XP_009244536.1	PREDICTED: ferritin heavy chain isoform X1 [Pongo abelii]
P13861	case2-VS-control	-1.00187	0.102441	-9.78003	8	1e-05	0.000138827	Down	P13861	cAMP-dependent protein kinase type II-alpha regulatory subunit OS=Homo sapiens OX=9606 GN=PRKAR2A PE=1 SV=2	100	0	NP_004148.1	cAMP-dependent protein kinase type II-alpha regulatory subunit isoform a [Homo sapiens]
Q08334	case2-VS-control	-1.9776	0.111054	-17.8077	5	1.02e-05	0.000141541	Down	Q08334	Interleukin-10 receptor subunit beta OS=Homo sapiens OX=9606 GN=IL10RB PE=1 SV=2	100	0	NP_000619.3	interleukin-10 receptor subunit beta precursor [Homo sapiens]
O15405	case2-VS-control	-1.66523	0.17089	-9.7444	8	1.03e-05	0.000141541	Down	O15405;O94842;Q96NM4	TOX high mobility group box family member 3 OS=Homo sapiens OX=9606 GN=TOX3 PE=1 SV=2	100	0	NP_001073899.2	TOX high mobility group box family member 3 isoform 1 [Homo sapiens]
Q00839	case2-VS-control	0.615848	0.0632099	9.74291	8	1.03e-05	0.000141541	None	Q00839	Heterogeneous nuclear ribonucleoprotein U OS=Homo sapiens OX=9606 GN=HNRNPU PE=1 SV=6	100	0	NP_114032.2	heterogeneous nuclear ribonucleoprotein U isoform a [Homo sapiens]
O75352	case2-VS-control	0.741468	0.0763307	9.71389	8	1.05e-05	0.000144112	None	O75352	Mannose-P-dolichol utilization defect 1 protein OS=Homo sapiens OX=9606 GN=MPDU1 PE=1 SV=2	100	2e-177	NP_004861.2	mannose-P-dolichol utilization defect 1 protein isoform 1 [Homo sapiens]
Q86VU5	case2-VS-control	1.51918	0.156429	9.71162	8	1.06e-05	0.000144112	Up	Q86VU5	Catechol O-methyltransferase domain-containing protein 1 OS=Homo sapiens OX=9606 GN=COMTD1 PE=1 SV=1	100	0	NP_653190.2	catechol O-methyltransferase domain-containing protein 1 [Homo sapiens]
P29992	case2-VS-control	-0.989469	0.102249	-9.677	8	1.08e-05	0.000147554	None	P29992	Guanine nucleotide-binding protein subunit alpha-11 OS=Homo sapiens OX=9606 GN=GNA11 PE=1 SV=2	100	0	NP_002058.2	guanine nucleotide-binding protein subunit alpha-11 [Homo sapiens]
P61160	case2-VS-control	1.12094	0.116163	9.64972	8	1.11e-05	0.000150024	Up	P61160	Actin-related protein 2 OS=Homo sapiens OX=9606 GN=ACTR2 PE=1 SV=1	100	0	NP_005713.1	actin-related protein 2 isoform b [Homo sapiens]
Q9BRR6	case2-VS-control	-1.15386	0.119598	-9.64779	8	1.11e-05	0.000150024	Down	Q9BRR6	ADP-dependent glucokinase OS=Homo sapiens OX=9606 GN=ADPGK PE=1 SV=1	100	0	XP_003818615.1	PREDICTED: ADP-dependent glucokinase isoform X1 [Pan paniscus]
Q9H2H9	case2-VS-control	0.712132	0.0739251	9.63315	8	1.12e-05	0.000151283	None	Q9H2H9	Sodium-coupled neutral amino acid transporter 1 OS=Homo sapiens OX=9606 GN=SLC38A1 PE=1 SV=1	100	0	NP_109599.3	sodium-coupled neutral amino acid transporter 1 isoform 1 [Homo sapiens]
P35052	case2-VS-control	-2.44364	0.221968	-11.009	7	1.13e-05	0.000152221	Down	P35052	Glypican-1 OS=Homo sapiens OX=9606 GN=GPC1 PE=1 SV=2	100	0	NP_002072.2	glypican-1 precursor [Homo sapiens]
Q9UJX6	case2-VS-control	-0.953618	0.0991945	-9.61361	8	1.14e-05	0.000152691	None	Q9UJX6	Anaphase-promoting complex subunit 2 OS=Homo sapiens OX=9606 GN=ANAPC2 PE=1 SV=1	100	0	NP_037498.1	anaphase-promoting complex subunit 2 [Homo sapiens]
Q9ULI3	case2-VS-control	-4.08055	0.152236	-26.8041	4	1.15e-05	0.000154044	Down	Q9ULI3	Protein HEG homolog 1 OS=Homo sapiens OX=9606 GN=HEG1 PE=1 SV=3	100	0	NP_065784.1	protein HEG homolog 1 precursor [Homo sapiens]
Q9NRV9	case2-VS-control	-1.2077	0.126014	-9.58389	8	1.16e-05	0.000155342	Down	Q9NRV9	Heme-binding protein 1 OS=Homo sapiens OX=9606 GN=HEBP1 PE=1 SV=1	100	2e-138	NP_057071.2	heme-binding protein 1 [Homo sapiens]
O75436	case2-VS-control	1.0157	0.106083	9.57455	8	1.17e-05	0.000156021	Up	O75436	Vacuolar protein sorting-associated protein 26A OS=Homo sapiens OX=9606 GN=VPS26A PE=1 SV=2	100	0	NP_004887.2	vacuolar protein sorting-associated protein 26A isoform 1 [Homo sapiens]
P62873	case2-VS-control	-1.17683	0.123378	-9.53843	8	1.21e-05	0.000159998	Down	P62873	Guanine nucleotide-binding protein G(I)/G(S)/G(T) subunit beta-1 OS=Homo sapiens OX=9606 GN=GNB1 PE=1 SV=3	100	0	NP_032168.1	guanine nucleotide-binding protein G(I)/G(S)/G(T) subunit beta-1 [Mus musculus]
Q03518	case2-VS-control	-1.11202	0.116634	-9.53426	8	1.21e-05	0.000160058	Down	Q03518	Antigen peptide transporter 1 OS=Homo sapiens OX=9606 GN=TAP1 PE=1 SV=2	100	0	NP_000584.2	antigen peptide transporter 1 isoform 1 [Homo sapiens]
Q9BZI7	case2-VS-control	-1.49029	0.136961	-10.8811	7	1.22e-05	0.000161244	Down	Q9BZI7	Regulator of nonsense transcripts 3B OS=Homo sapiens OX=9606 GN=UPF3B PE=1 SV=1	100	0	NP_542199.1	regulator of nonsense transcripts 3B isoform 1 [Homo sapiens]
Q92796	case2-VS-control	0.772868	0.0812543	9.51172	8	1.23e-05	0.000161534	None	Q92796	Disks large homolog 3 OS=Homo sapiens OX=9606 GN=DLG3 PE=1 SV=2	100	0	NP_066943.2	disks large homolog 3 isoform a [Homo sapiens]
O95292	case2-VS-control	0.903297	0.0949688	9.51152	8	1.23e-05	0.000161534	None	O95292	Vesicle-associated membrane protein-associated protein B/C OS=Homo sapiens OX=9606 GN=VAPB PE=1 SV=3	100	8e-180	NP_004729.1	vesicle-associated membrane protein-associated protein B/C isoform 1 [Homo sapiens]
P30533	case2-VS-control	0.94467	0.0995521	9.4892	8	1.25e-05	0.000163908	None	P30533	Alpha-2-macroglobulin receptor-associated protein OS=Homo sapiens OX=9606 GN=LRPAP1 PE=1 SV=1	100	0	NP_002328.1	alpha-2-macroglobulin receptor-associated protein precursor [Homo sapiens]
P01130	case2-VS-control	-1.11262	0.117331	-9.48273	8	1.26e-05	0.000164274	Down	P01130	Low-density lipoprotein receptor OS=Homo sapiens OX=9606 GN=LDLR PE=1 SV=1	100	0	NP_000518.1	low-density lipoprotein receptor isoform 1 precursor [Homo sapiens]
P61225	case2-VS-control	1.3785	0.145517	9.47315	8	1.27e-05	0.000165044	Up	P61225	Ras-related protein Rap-2b OS=Homo sapiens OX=9606 GN=RAP2B PE=1 SV=1	100	5e-133	NP_082988.1	ras-related protein Rap-2b precursor [Mus musculus]
Q8TD30	case2-VS-control	3.24893	0.34327	9.46465	8	1.28e-05	0.00016568	Up	Q8TD30	Alanine aminotransferase 2 OS=Homo sapiens OX=9606 GN=GPT2 PE=1 SV=1	100	0	NP_597700.1	alanine aminotransferase 2 isoform 1 [Homo sapiens]
P04792	case2-VS-control	-2.11873	0.224219	-9.44939	8	1.29e-05	0.000167204	Down	P04792	Heat shock protein beta-1 OS=Homo sapiens OX=9606 GN=HSPB1 PE=1 SV=2	100	1e-148	NP_001531.1	heat shock protein beta-1 [Homo sapiens]
Q8NCG7	case2-VS-control	-1.45192	0.154403	-9.40342	8	1.34e-05	0.000172869	Down	Q8NCG7	Sn1-specific diacylglycerol lipase beta OS=Homo sapiens OX=9606 GN=DAGLB PE=1 SV=2	100	0	NP_631918.3	sn1-specific diacylglycerol lipase beta isoform 1 [Homo sapiens]
Q68CZ2	case2-VS-control	-1.13983	0.106492	-10.7034	7	1.36e-05	0.000175401	Down	Q68CZ2	Tensin-3 OS=Homo sapiens OX=9606 GN=TNS3 PE=1 SV=2	100	0	XP_011513781.1	PREDICTED: tensin-3 isoform X6 [Homo sapiens]
Q9BTY2	case2-VS-control	1.42633	0.15212	9.37638	8	1.37e-05	0.000175615	Up	Q9BTY2	Plasma alpha-L-fucosidase OS=Homo sapiens OX=9606 GN=FUCA2 PE=1 SV=2	100	0	NP_114409.2	plasma alpha-L-fucosidase precursor [Homo sapiens]
Q15334	case2-VS-control	-1.97555	0.154023	-12.8263	6	1.38e-05	0.000176409	Down	Q15334	Lethal(2) giant larvae protein homolog 1 OS=Homo sapiens OX=9606 GN=LLGL1 PE=1 SV=3	100	0	Q15334.3	RecName: Full=Lethal(2) giant larvae protein homolog 1; Short=LLGL; AltName: Full=DLG4; AltName: Full=Hugl-1; AltName: Full=Human homolog to the D-lgl gene protein
O00462	case2-VS-control	2.77843	0.216922	12.8084	6	1.39e-05	0.000177355	Up	O00462	Beta-mannosidase OS=Homo sapiens OX=9606 GN=MANBA PE=2 SV=3	100	0	NP_005899.3	beta-mannosidase precursor [Homo sapiens]
Q15796	case2-VS-control	-2.10977	0.198042	-10.6532	7	1.41e-05	0.000178978	Down	Q15796	Mothers against decapentaplegic homolog 2 OS=Homo sapiens OX=9606 GN=SMAD2 PE=1 SV=1	99.572	0	ERE86249.1	putative mothers against decapentaplegic isoform 2 [Cricetulus griseus]
P23469	case2-VS-control	-1.20947	0.130071	-9.2985	8	1.46e-05	0.000184739	Down	P23469	Receptor-type tyrosine-protein phosphatase epsilon OS=Homo sapiens OX=9606 GN=PTPRE PE=1 SV=1	100	0	NP_006495.1	receptor-type tyrosine-protein phosphatase epsilon isoform 1 precursor [Homo sapiens]
Q68CQ7	case2-VS-control	0.831963	0.0896384	9.28133	8	1.48e-05	0.000186767	None	Q68CQ7	Glycosyltransferase 8 domain-containing protein 1 OS=Homo sapiens OX=9606 GN=GLT8D1 PE=1 SV=2	100	0	NP_060916.1	glycosyltransferase 8 domain-containing protein 1 [Homo sapiens]
P48509	case2-VS-control	-1.36568	0.147239	-9.27527	8	1.48e-05	0.000186815	Down	P48509	CD151 antigen OS=Homo sapiens OX=9606 GN=CD151 PE=1 SV=3	100	0	NP_004348.2	CD151 antigen [Homo sapiens]
O75915	case2-VS-control	1.1129	0.120001	9.27416	8	1.49e-05	0.000186815	Up	O75915	PRA1 family protein 3 OS=Homo sapiens OX=9606 GN=ARL6IP5 PE=1 SV=1	100	6e-135	NP_006398.1	PRA1 family protein 3 [Homo sapiens]
O15439	case2-VS-control	1.26159	0.13622	9.26147	8	1.5e-05	0.000188203	Up	O15439	Multidrug resistance-associated protein 4 OS=Homo sapiens OX=9606 GN=ABCC4 PE=1 SV=3	100	0	NP_005836.2	multidrug resistance-associated protein 4 isoform 1 [Homo sapiens]
P06858	case2-VS-control	-1.40831	0.152465	-9.23696	8	1.53e-05	0.000191402	Down	P06858	Lipoprotein lipase OS=Homo sapiens OX=9606 GN=LPL PE=1 SV=1	100	0	NP_000228.1	lipoprotein lipase precursor [Homo sapiens]
Q15031	case2-VS-control	0.967456	0.104823	9.2294	8	1.54e-05	0.000192043	None	Q15031	Probable leucine--tRNA ligase, mitochondrial OS=Homo sapiens OX=9606 GN=LARS2 PE=1 SV=2	100	0	NP_056155.1	probable leucine--tRNA ligase, mitochondrial [Homo sapiens]
O00115	case2-VS-control	1.38406	0.150197	9.21493	8	1.56e-05	0.000193759	Up	O00115	Deoxyribonuclease-2-alpha OS=Homo sapiens OX=9606 GN=DNASE2 PE=1 SV=2	100	0	NP_001366.1	deoxyribonuclease-2-alpha precursor [Homo sapiens]
Q14571	case2-VS-control	0.989875	0.107473	9.21044	8	1.56e-05	0.000193935	None	Q14571	Inositol 1,4,5-trisphosphate receptor type 2 OS=Homo sapiens OX=9606 GN=ITPR2 PE=1 SV=2	100	0	NP_002214.2	inositol 1,4,5-trisphosphate receptor type 2 [Homo sapiens]
P13804	case2-VS-control	-1.30099	0.141311	-9.2066	8	1.57e-05	0.000194013	Down	P13804	Electron transfer flavoprotein subunit alpha, mitochondrial OS=Homo sapiens OX=9606 GN=ETFA PE=1 SV=1	100	0	NP_000117.1	electron transfer flavoprotein subunit alpha, mitochondrial isoform a [Homo sapiens]
P15586	case2-VS-control	-0.986368	0.107194	-9.20168	8	1.57e-05	0.00019426	None	P15586	N-acetylglucosamine-6-sulfatase OS=Homo sapiens OX=9606 GN=GNS PE=1 SV=3	100	0	NP_002067.1	N-acetylglucosamine-6-sulfatase precursor [Homo sapiens]
P51809	case2-VS-control	-0.833953	0.0911424	-9.15001	8	1.64e-05	0.000201958	None	P51809	Vesicle-associated membrane protein 7 OS=Homo sapiens OX=9606 GN=VAMP7 PE=1 SV=3	100	1e-164	NP_005629.1	vesicle-associated membrane protein 7 isoform 1 [Homo sapiens]
Q96QK1	case2-VS-control	1.0096	0.110385	9.14615	8	1.65e-05	0.000202049	Up	Q96QK1	Vacuolar protein sorting-associated protein 35 OS=Homo sapiens OX=9606 GN=VPS35 PE=1 SV=2	100	0	NP_060676.2	vacuolar protein sorting-associated protein 35 [Homo sapiens]
O75190	case2-VS-control	-0.833904	0.0913204	-9.13163	8	1.67e-05	0.000203361	None	O75190	DnaJ homolog subfamily B member 6 OS=Homo sapiens OX=9606 GN=DNAJB6 PE=1 SV=2	100	0	NP_490647.1	dnaJ homolog subfamily B member 6 isoform a [Homo sapiens]
P35250	case2-VS-control	-0.620484	0.0679494	-9.13156	8	1.67e-05	0.000203361	None	P35250	Replication factor C subunit 2 OS=Homo sapiens OX=9606 GN=RFC2 PE=1 SV=3	100	0	NP_852136.1	replication factor C subunit 2 isoform 1 [Homo sapiens]
Q9GZR2	case2-VS-control	-1.86038	0.179891	-10.3417	7	1.71e-05	0.000208706	Down	Q9GZR2	RNA exonuclease 4 OS=Homo sapiens OX=9606 GN=REXO4 PE=1 SV=2	100	0	NP_065118.2	RNA exonuclease 4 isoform 1 [Homo sapiens]
Q13557	case2-VS-control	3.956	0.24748	15.9851	5	1.74e-05	0.00021191	Up	Q13557	Calcium/calmodulin-dependent protein kinase type II subunit delta OS=Homo sapiens OX=9606 GN=CAMK2D PE=1 SV=3	100	0	NP_001212.2	calcium/calmodulin-dependent protein kinase type II subunit delta isoform 3 [Homo sapiens]
O14681	case2-VS-control	0.803096	0.0885722	9.06713	8	1.75e-05	0.000212565	None	O14681	Etoposide-induced protein 2.4 homolog OS=Homo sapiens OX=9606 GN=EI24 PE=1 SV=4	100	0	NP_004870.3	etoposide-induced protein 2.4 homolog isoform 1 [Homo sapiens]
Q9NQ11	case2-VS-control	1.39126	0.0875626	15.8887	5	1.8e-05	0.000217168	Up	Q9NQ11	Cation-transporting ATPase 13A2 OS=Homo sapiens OX=9606 GN=ATP13A2 PE=1 SV=2	100	0	NP_071372.1	cation-transporting ATPase 13A2 isoform 1 [Homo sapiens]
Q9BY67	case2-VS-control	-3.89944	0.162848	-23.9453	4	1.8e-05	0.000217421	Down	Q9BY67	Cell adhesion molecule 1 OS=Homo sapiens OX=9606 GN=CADM1 PE=1 SV=2	100	0	NP_055148.3	cell adhesion molecule 1 isoform D precursor [Homo sapiens]
Q9H3R2	case2-VS-control	4.85819	0.397775	12.2134	6	1.83e-05	0.000220411	Up	Q9H3R2	Mucin-13 OS=Homo sapiens OX=9606 GN=MUC13 PE=1 SV=3	100	0	NP_149038.3	mucin-13 precursor [Homo sapiens]
O75695	case2-VS-control	-0.96202	0.106973	-8.99313	8	1.86e-05	0.000222059	None	O75695	Protein XRP2 OS=Homo sapiens OX=9606 GN=RP2 PE=1 SV=4	100	0	NP_008846.2	protein XRP2 [Homo sapiens]
P00387	case2-VS-control	-1.18466	0.131736	-8.99269	8	1.86e-05	0.000222059	Down	P00387	NADH-cytochrome b5 reductase 3 OS=Homo sapiens OX=9606 GN=CYB5R3 PE=1 SV=3	100	0	NP_000389.1	NADH-cytochrome b5 reductase 3 isoform 1 [Homo sapiens]
P46459	case2-VS-control	-0.70051	0.0779026	-8.99213	8	1.87e-05	0.000222059	None	P46459	Vesicle-fusing ATPase OS=Homo sapiens OX=9606 GN=NSF PE=1 SV=3	100	0	NP_006169.2	vesicle-fusing ATPase [Homo sapiens]
Q8NBP0	case2-VS-control	1.38426	0.153957	8.99121	8	1.87e-05	0.000222059	Up	Q8NBP0	Tetratricopeptide repeat protein 13 OS=Homo sapiens OX=9606 GN=TTC13 PE=2 SV=3	100	0	NP_078801.3	tetratricopeptide repeat protein 13 isoform a [Homo sapiens]
Q7Z3C6	case2-VS-control	-1.39994	0.155907	-8.9793	8	1.88e-05	0.00022309	Down	Q7Z3C6	Autophagy-related protein 9A OS=Homo sapiens OX=9606 GN=ATG9A PE=1 SV=3	100	0	NP_001070666.1	autophagy-related protein 9A [Homo sapiens]
P04818	case2-VS-control	-1.39226	0.155052	-8.97927	8	1.88e-05	0.00022309	Down	P04818	Thymidylate synthase OS=Homo sapiens OX=9606 GN=TYMS PE=1 SV=3	100	0	NP_001062.1	thymidylate synthase [Homo sapiens]
Q9BU76	case2-VS-control	1.89397	0.211105	8.97169	8	1.9e-05	0.000223908	Up	Q9BU76	Multiple myeloma tumor-associated protein 2 OS=Homo sapiens OX=9606 GN=MMTAG2 PE=1 SV=1	100	0	NP_077295.1	multiple myeloma tumor-associated protein 2 [Homo sapiens]
Q9P258	case2-VS-control	1.81506	0.202492	8.96363	8	1.91e-05	0.000224817	Up	Q9P258	Protein RCC2 OS=Homo sapiens OX=9606 GN=RCC2 PE=1 SV=2	100	0	NP_061185.1	protein RCC2 [Homo sapiens]
O95363	case2-VS-control	1.35352	0.15114	8.95538	8	1.92e-05	0.000225304	Up	O95363	Phenylalanine--tRNA ligase, mitochondrial OS=Homo sapiens OX=9606 GN=FARS2 PE=1 SV=1	100	0	NP_006558.1	phenylalanine--tRNA ligase, mitochondrial [Homo sapiens]
Q8N2U0	case2-VS-control	2.27474	0.223826	10.163	7	1.92e-05	0.000225304	Up	Q8N2U0	Transmembrane protein 256 OS=Homo sapiens OX=9606 GN=TMEM256 PE=3 SV=1	100	3e-73	NP_689979.1	transmembrane protein 256 precursor [Homo sapiens]
Q8IVS2	case2-VS-control	1.09154	0.122156	8.93567	8	1.95e-05	0.000228292	Up	Q8IVS2	Malonyl-CoA-acyl carrier protein transacylase, mitochondrial OS=Homo sapiens OX=9606 GN=MCAT PE=1 SV=2	100	0	NP_775738.3	malonyl-CoA-acyl carrier protein transacylase, mitochondrial isoform a precursor [Homo sapiens]
Q6PD62	case2-VS-control	-0.596632	0.0668344	-8.92703	8	1.97e-05	0.000228774	None	Q6PD62	RNA polymerase-associated protein CTR9 homolog OS=Homo sapiens OX=9606 GN=CTR9 PE=1 SV=1	100	0	NP_055448.1	RNA polymerase-associated protein CTR9 homolog isoform 1 [Homo sapiens]
Q96AQ6	case2-VS-control	-0.818319	0.0916681	-8.92698	8	1.97e-05	0.000228774	None	Q96AQ6	Pre-B-cell leukemia transcription factor-interacting protein 1 OS=Homo sapiens OX=9606 GN=PBXIP1 PE=1 SV=1	100	0	NP_065385.2	pre-B-cell leukemia transcription factor-interacting protein 1 isoform 1 [Homo sapiens]
Q9BVP2	case2-VS-control	0.495452	0.0555288	8.92243	8	1.97e-05	0.000229057	None	Q9BVP2	Guanine nucleotide-binding protein-like 3 OS=Homo sapiens OX=9606 GN=GNL3 PE=1 SV=2	100	0	NP_055181.3	guanine nucleotide-binding protein-like 3 isoform 1 [Homo sapiens]
Q9BUJ2	case2-VS-control	0.891365	0.100026	8.91136	8	1.99e-05	0.000230523	None	Q9BUJ2	Heterogeneous nuclear ribonucleoprotein U-like protein 1 OS=Homo sapiens OX=9606 GN=HNRNPUL1 PE=1 SV=2	100	0	NP_008971.2	heterogeneous nuclear ribonucleoprotein U-like protein 1 isoform a [Homo sapiens]
Q04837	case2-VS-control	-0.938449	0.105342	-8.9086	8	2e-05	0.000230523	None	Q04837	Single-stranded DNA-binding protein, mitochondrial OS=Homo sapiens OX=9606 GN=SSBP1 PE=1 SV=1	100	6e-106	NP_003134.1	single-stranded DNA-binding protein, mitochondrial precursor [Homo sapiens]
Q9NPH3	case2-VS-control	-1.35327	0.112586	-12.0199	6	2.01e-05	0.000231556	Down	Q9NPH3	Interleukin-1 receptor accessory protein OS=Homo sapiens OX=9606 GN=IL1RAP PE=1 SV=2	100	0	NP_002173.1	interleukin-1 receptor accessory protein isoform 1 precursor [Homo sapiens]
O95721	case2-VS-control	-0.67393	0.0759954	-8.86805	8	2.07e-05	0.000237083	None	O95721	Synaptosomal-associated protein 29 OS=Homo sapiens OX=9606 GN=SNAP29 PE=1 SV=1	100	0	NP_004773.1	synaptosomal-associated protein 29 [Homo sapiens]
Q99523	case2-VS-control	1.51877	0.17131	8.86559	8	2.07e-05	0.000237083	Up	Q99523	Sortilin OS=Homo sapiens OX=9606 GN=SORT1 PE=1 SV=3	100	0	NP_002950.3	sortilin isoform 1 preproprotein [Homo sapiens]
P60891	case2-VS-control	-3.56402	0.298104	-11.9556	6	2.07e-05	0.000237087	Down	P60891	Ribose-phosphate pyrophosphokinase 1 OS=Homo sapiens OX=9606 GN=PRPS1 PE=1 SV=2	100	0	ELR51492.1	Ribose-phosphate pyrophosphokinase 1, partial [Bos mutus]
Q5J8M3	case2-VS-control	0.755766	0.0853647	8.85338	8	2.09e-05	0.000238311	None	Q5J8M3	ER membrane protein complex subunit 4 OS=Homo sapiens OX=9606 GN=EMC4 PE=1 SV=2	100	2e-132	NP_057538.1	ER membrane protein complex subunit 4 isoform a [Homo sapiens]
P51687	case2-VS-control	-1.62664	0.0706867	-23.0119	4	2.11e-05	0.000240265	Down	P51687	Sulfite oxidase, mitochondrial OS=Homo sapiens OX=9606 GN=SUOX PE=1 SV=2	100	0	XP_005269169.1	PREDICTED: sulfite oxidase, mitochondrial isoform X1 [Homo sapiens]
P61158	case2-VS-control	1.09647	0.124212	8.82745	8	2.14e-05	0.000242251	Up	P61158	Actin-related protein 3 OS=Homo sapiens OX=9606 GN=ACTR3 PE=1 SV=3	100	0	XP_011793093.1	PREDICTED: actin-related protein 3 isoform X1 [Colobus angolensis palliatus]
Q96FF9	case2-VS-control	-2.20734	0.185632	-11.891	6	2.14e-05	0.000242251	Down	Q96FF9	Sororin OS=Homo sapiens OX=9606 GN=CDCA5 PE=1 SV=1	100	2e-179	NP_542399.1	sororin [Homo sapiens]
Q96HC4	case2-VS-control	2.57706	0.292298	8.81655	8	2.16e-05	0.000243308	Up	Q96HC4	PDZ and LIM domain protein 5 OS=Homo sapiens OX=9606 GN=PDLIM5 PE=1 SV=5	100	0	Q96HC4.5	RecName: Full=PDZ and LIM domain protein 5; AltName: Full=Enigma homolog; AltName: Full=Enigma-like PDZ and LIM domains protein
O60568	case2-VS-control	-1.10485	0.125414	-8.80962	8	2.17e-05	0.000244119	Down	O60568	Procollagen-lysine,2-oxoglutarate 5-dioxygenase 3 OS=Homo sapiens OX=9606 GN=PLOD3 PE=1 SV=1	100	0	NP_001075.1	procollagen-lysine,2-oxoglutarate 5-dioxygenase 3 precursor [Homo sapiens]
Q6UW63	case2-VS-control	-0.77391	0.0879191	-8.80253	8	2.18e-05	0.000244461	None	Q6UW63	KDEL motif-containing protein 1 OS=Homo sapiens OX=9606 GN=KDELC1 PE=1 SV=1	100	0	NP_076994.2	KDEL motif-containing protein 1 isoform 1 precursor [Homo sapiens]
Q9C0D9	case2-VS-control	1.0898	0.123812	8.80209	8	2.18e-05	0.000244461	Up	Q9C0D9	Ethanolaminephosphotransferase 1 OS=Homo sapiens OX=9606 GN=SELENOI PE=1 SV=3	100	0	NP_277040.1	ethanolaminephosphotransferase 1 [Homo sapiens]
Q9NYB0	case2-VS-control	-1.18604	0.119098	-9.95852	7	2.2e-05	0.000245803	Down	Q9NYB0	Telomeric repeat-binding factor 2-interacting protein 1 OS=Homo sapiens OX=9606 GN=TERF2IP PE=1 SV=1	100	0	NP_061848.2	telomeric repeat-binding factor 2-interacting protein 1 [Homo sapiens]
O15269	case2-VS-control	0.997829	0.1136	8.78371	8	2.22e-05	0.000247037	None	O15269	Serine palmitoyltransferase 1 OS=Homo sapiens OX=9606 GN=SPTLC1 PE=1 SV=1	100	0	NP_006406.1	serine palmitoyltransferase 1 isoform a [Homo sapiens]
O00186	case2-VS-control	0.791289	0.090191	8.77348	8	2.23e-05	0.000247868	None	O00186	Syntaxin-binding protein 3 OS=Homo sapiens OX=9606 GN=STXBP3 PE=1 SV=2	100	0	NP_009200.2	syntaxin-binding protein 3 [Homo sapiens]
Q8NCN5	case2-VS-control	-1.4265	0.162687	-8.76834	8	2.24e-05	0.000247868	Down	Q8NCN5	Pyruvate dehydrogenase phosphatase regulatory subunit, mitochondrial OS=Homo sapiens OX=9606 GN=PDPR PE=1 SV=2	100	0	NP_060460.4	pyruvate dehydrogenase phosphatase regulatory subunit, mitochondrial isoform 1 precursor [Homo sapiens]
Q5H8A4	case2-VS-control	1.20479	0.137403	8.7683	8	2.24e-05	0.000247868	Up	Q5H8A4	GPI ethanolamine phosphate transferase 2 OS=Homo sapiens OX=9606 GN=PIGG PE=1 SV=1	100	0	NP_001120650.1	GPI ethanolamine phosphate transferase 2 isoform 1 [Homo sapiens]
Q96IK1	case2-VS-control	-1.46337	0.166895	-8.76819	8	2.24e-05	0.000247868	Down	Q96IK1	Biorientation of chromosomes in cell division protein 1 OS=Homo sapiens OX=9606 GN=BOD1 PE=1 SV=2	100	5e-132	NP_612378.1	biorientation of chromosomes in cell division protein 1 isoform a [Homo sapiens]
P82979	case2-VS-control	1.63675	0.186891	8.75779	8	2.26e-05	0.000249434	Up	P82979	SAP domain-containing ribonucleoprotein OS=Homo sapiens OX=9606 GN=SARNP PE=1 SV=3	100	7e-148	NP_149073.1	SAP domain-containing ribonucleoprotein [Homo sapiens]
P57088	case2-VS-control	1.75587	0.200716	8.74805	8	2.28e-05	0.000250877	Up	P57088	Transmembrane protein 33 OS=Homo sapiens OX=9606 GN=TMEM33 PE=1 SV=2	100	4e-180	NP_060596.2	transmembrane protein 33 [Homo sapiens]
P30837	case2-VS-control	-1.66841	0.190781	-8.74517	8	2.29e-05	0.000250885	Down	P30837	Aldehyde dehydrogenase X, mitochondrial OS=Homo sapiens OX=9606 GN=ALDH1B1 PE=1 SV=3	100	0	P30837.3	RecName: Full=Aldehyde dehydrogenase X, mitochondrial; AltName: Full=Aldehyde dehydrogenase 5; AltName: Full=Aldehyde dehydrogenase family 1 member B1; Flags: Precursor
O95197	case2-VS-control	0.547849	0.0627061	8.73678	8	2.3e-05	0.000252056	None	O95197	Reticulon-3 OS=Homo sapiens OX=9606 GN=RTN3 PE=1 SV=2	100	0	NP_001252518.1	reticulon-3 isoform e [Homo sapiens]
O75521	case2-VS-control	-0.999387	0.114863	-8.70067	8	2.37e-05	0.000259195	None	O75521	Enoyl-CoA delta isomerase 2, mitochondrial OS=Homo sapiens OX=9606 GN=ECI2 PE=1 SV=4	100	0	NP_996667.2	enoyl-CoA delta isomerase 2, mitochondrial isoform 2 [Homo sapiens]
P11766	case2-VS-control	1.9461	0.198203	9.81876	7	2.41e-05	0.000262791	Up	P11766	Alcohol dehydrogenase class-3 OS=Homo sapiens OX=9606 GN=ADH5 PE=1 SV=4	100	0	NP_000662.3	alcohol dehydrogenase class-3 [Homo sapiens]
Q8N999	case2-VS-control	-3.61569	0.310581	-11.6417	6	2.42e-05	0.000262808	Down	Q8N999	Uncharacterized protein C12orf29 OS=Homo sapiens OX=9606 GN=C12orf29 PE=1 SV=2	100	0	NP_001009894.2	uncharacterized protein C12orf29 [Homo sapiens]
Q9NR77	case2-VS-control	-1.39099	0.16033	-8.67584	8	2.42e-05	0.000262808	Down	Q9NR77	Peroxisomal membrane protein 2 OS=Homo sapiens OX=9606 GN=PXMP2 PE=1 SV=3	100	1e-135	NP_061133.1	peroxisomal membrane protein 2 [Homo sapiens]
O60885	case2-VS-control	-0.856395	0.0988656	-8.66221	8	2.45e-05	0.000265221	None	O60885	Bromodomain-containing protein 4 OS=Homo sapiens OX=9606 GN=BRD4 PE=1 SV=2	100	0	NP_490597.1	bromodomain-containing protein 4 isoform long [Homo sapiens]
O75439	case2-VS-control	-1.24438	0.143776	-8.65503	8	2.47e-05	0.000266211	Down	O75439	Mitochondrial-processing peptidase subunit beta OS=Homo sapiens OX=9606 GN=PMPCB PE=1 SV=2	100	0	NP_004270.2	mitochondrial-processing peptidase subunit beta precursor [Homo sapiens]
O95219	case2-VS-control	0.937127	0.108323	8.65122	8	2.48e-05	0.000266448	None	O95219	Sorting nexin-4 OS=Homo sapiens OX=9606 GN=SNX4 PE=1 SV=1	100	0	NP_003785.1	sorting nexin-4 [Homo sapiens]
Q9HCE1	case2-VS-control	1.26826	0.14668	8.64639	8	2.49e-05	0.000266916	Up	Q9HCE1	Putative helicase MOV-10 OS=Homo sapiens OX=9606 GN=MOV10 PE=1 SV=2	100	0	NP_066014.1	putative helicase MOV-10 isoform 1 [Homo sapiens]
O95425	case2-VS-control	1.56484	0.160326	9.76034	7	2.51e-05	0.000268353	Up	O95425	Supervillin OS=Homo sapiens OX=9606 GN=SVIL PE=1 SV=2	100	0	NP_068506.2	supervillin isoform 2 [Homo sapiens]
P49840	case2-VS-control	2.03193	0.235325	8.63456	8	2.51e-05	0.000268353	Up	P49840	Glycogen synthase kinase-3 alpha OS=Homo sapiens OX=9606 GN=GSK3A PE=1 SV=2	100	0	NP_063937.2	glycogen synthase kinase-3 alpha [Homo sapiens]
O15144	case2-VS-control	1.16564	0.135104	8.62774	8	2.53e-05	0.000269284	Up	O15144	Actin-related protein 2/3 complex subunit 2 OS=Homo sapiens OX=9606 GN=ARPC2 PE=1 SV=1	100	0	NP_005722.1	actin-related protein 2/3 complex subunit 2 [Homo sapiens]
Q96SB8	case2-VS-control	1.58581	0.137382	11.5431	6	2.54e-05	0.000270422	Up	Q96SB8	Structural maintenance of chromosomes protein 6 OS=Homo sapiens OX=9606 GN=SMC6 PE=1 SV=2	100	0	NP_078900.1	structural maintenance of chromosomes protein 6 [Homo sapiens]
Q95604	case2-VS-control	-1.24582	0.144705	-8.60935	8	2.56e-05	0.000272256	Down	Q95604	HLA class I histocompatibility antigen, Cw-17 alpha chain OS=Homo sapiens OX=9606 GN=HLA-C PE=1 SV=1	100	0	Q95604.1	RecName: Full=HLA class I histocompatibility antigen, Cw-17 alpha chain; AltName: Full=MHC class I antigen Cw*17; Flags: Precursor
Q02818	case2-VS-control	-0.900257	0.104913	-8.58097	8	2.63e-05	0.000277805	None	Q02818	Nucleobindin-1 OS=Homo sapiens OX=9606 GN=NUCB1 PE=1 SV=4	100	0	NP_006175.2	nucleobindin-1 precursor [Homo sapiens]
Q9UJU6	case2-VS-control	1.03747	0.120915	8.58019	8	2.63e-05	0.000277805	Up	Q9UJU6	Drebrin-like protein OS=Homo sapiens OX=9606 GN=DBNL PE=1 SV=1	100	0	NP_001014436.1	drebrin-like protein isoform b [Homo sapiens]
P57105	case2-VS-control	1.39603	0.162883	8.57074	8	2.65e-05	0.000279408	Up	P57105	Synaptojanin-2-binding protein OS=Homo sapiens OX=9606 GN=SYNJ2BP PE=1 SV=2	100	3e-102	NP_060843.2	synaptojanin-2-binding protein [Homo sapiens]
Q96CS3	case2-VS-control	-0.598441	0.0700913	-8.53802	8	2.73e-05	0.000286655	None	Q96CS3	FAS-associated factor 2 OS=Homo sapiens OX=9606 GN=FAF2 PE=1 SV=2	100	0	NP_055428.1	FAS-associated factor 2 [Homo sapiens]
P52948	case2-VS-control	-0.787497	0.0923581	-8.52656	8	2.75e-05	0.000288817	None	P52948	Nuclear pore complex protein Nup98-Nup96 OS=Homo sapiens OX=9606 GN=NUP98 PE=1 SV=4	100	0	P52948.4	RecName: Full=Nuclear pore complex protein Nup98-Nup96; Contains: RecName: Full=Nuclear pore complex protein Nup98; AltName: Full=98 kDa nucleoporin; AltName: Full=Nucleoporin Nup98; Short=Nup98; Contains: RecName: Full=Nuclear pore complex protein Nup96; AltName: Full=96 kDa nucleoporin; AltName: Full=Nucleoporin Nup96; Short=Nup96; Flags: Precursor
Q9NR28	case2-VS-control	-0.767695	0.0901149	-8.51906	8	2.77e-05	0.000290016	None	Q9NR28	Diablo homolog, mitochondrial OS=Homo sapiens OX=9606 GN=DIABLO PE=1 SV=1	100	1e-175	NP_063940.1	diablo homolog, mitochondrial isoform 1 precursor [Homo sapiens]
Q27J81	case2-VS-control	2.06722	0.215214	9.6054	7	2.79e-05	0.000291257	Up	Q27J81	Inverted formin-2 OS=Homo sapiens OX=9606 GN=INF2 PE=1 SV=2	100	0	NP_071934.3	inverted formin-2 isoform 1 [Homo sapiens]
O15145	case2-VS-control	1.07527	0.12642	8.50553	8	2.8e-05	0.000292063	Up	O15145	Actin-related protein 2/3 complex subunit 3 OS=Homo sapiens OX=9606 GN=ARPC3 PE=1 SV=3	100	9e-132	NP_001029443.1	actin-related protein 2/3 complex subunit 3 [Bos taurus]
Q08380	case2-VS-control	0.93826	0.110345	8.50294	8	2.81e-05	0.000292063	None	Q08380	Galectin-3-binding protein OS=Homo sapiens OX=9606 GN=LGALS3BP PE=1 SV=1	100	0	NP_005558.1	galectin-3-binding protein precursor [Homo sapiens]
Q9UHB6	case2-VS-control	-1.17893	0.138855	-8.4904	8	2.84e-05	0.000294444	Down	Q9UHB6	LIM domain and actin-binding protein 1 OS=Homo sapiens OX=9606 GN=LIMA1 PE=1 SV=1	100	0	NP_057441.1	LIM domain and actin-binding protein 1 isoform 2 [Homo sapiens]
Q96HJ9	case2-VS-control	-1.29106	0.152101	-8.48823	8	2.84e-05	0.000294444	Down	Q96HJ9	Protein FMC1 homolog OS=Homo sapiens OX=9606 GN=FMC1 PE=1 SV=2	100	4e-77	NP_932068.2	protein FMC1 homolog [Homo sapiens]
Q8N0Z8	case2-VS-control	0.829716	0.0736749	11.2619	6	2.93e-05	0.00030247	None	Q8N0Z8	tRNA pseudouridine synthase-like 1 OS=Homo sapiens OX=9606 GN=PUSL1 PE=1 SV=1	100	0	NP_699170.1	tRNA pseudouridine synthase-like 1 isoform 2 [Homo sapiens]
G2XKQ0	case2-VS-control	-1.05738	0.125108	-8.45173	8	2.93e-05	0.00030247	Down	G2XKQ0;P63165	Small ubiquitin-related modifier 5 OS=Homo sapiens OX=9606 GN=SUMO1P1 PE=1 SV=2	99.01	1e-67	ACM86836.1	Sumo13 [Homo sapiens]
P20339	case2-VS-control	0.706737	0.0838127	8.43235	8	2.98e-05	0.000306701	None	P20339	Ras-related protein Rab-5A OS=Homo sapiens OX=9606 GN=RAB5A PE=1 SV=2	100	2e-161	NP_004153.2	ras-related protein Rab-5A isoform 1 [Homo sapiens]
Q9P031	case2-VS-control	0.849777	0.0757154	11.2233	6	2.99e-05	0.000306701	None	Q9P031	Thyroid transcription factor 1-associated protein 26 OS=Homo sapiens OX=9606 GN=CCDC59 PE=1 SV=2	100	4e-177	NP_054886.2	thyroid transcription factor 1-associated protein 26 [Homo sapiens]
O75907	case2-VS-control	1.40435	0.166763	8.42119	8	3.01e-05	0.000308476	Up	O75907	Diacylglycerol O-acyltransferase 1 OS=Homo sapiens OX=9606 GN=DGAT1 PE=1 SV=2	100	0	NP_036211.2	diacylglycerol O-acyltransferase 1 [Homo sapiens]
P33527	case2-VS-control	-0.673202	0.0800787	-8.40676	8	3.05e-05	0.000311654	None	P33527	Multidrug resistance-associated protein 1 OS=Homo sapiens OX=9606 GN=ABCC1 PE=1 SV=3	100	0	NP_004987.2	multidrug resistance-associated protein 1 [Homo sapiens]
Q9NPH0	case2-VS-control	-1.18221	0.105755	-11.1787	6	3.06e-05	0.000311748	Down	Q9NPH0	Lysophosphatidic acid phosphatase type 6 OS=Homo sapiens OX=9606 GN=ACP6 PE=1 SV=3	100	0	NP_057445.4	lysophosphatidic acid phosphatase type 6 isoform 1 [Homo sapiens]
Q9ULC3	case2-VS-control	-1.30963	0.155937	-8.39841	8	3.07e-05	0.000312432	Down	Q9ULC3	Ras-related protein Rab-23 OS=Homo sapiens OX=9606 GN=RAB23 PE=1 SV=1	100	9e-177	NP_057361.3	ras-related protein Rab-23 [Homo sapiens]
Q9BTV4	case2-VS-control	-0.623725	0.0743041	-8.39421	8	3.08e-05	0.000312432	None	Q9BTV4	Transmembrane protein 43 OS=Homo sapiens OX=9606 GN=TMEM43 PE=1 SV=1	100	0	NP_077310.1	transmembrane protein 43 [Homo sapiens]
P28288	case2-VS-control	0.792142	0.0943822	8.39292	8	3.09e-05	0.000312432	None	P28288	ATP-binding cassette sub-family D member 3 OS=Homo sapiens OX=9606 GN=ABCD3 PE=1 SV=1	100	0	NP_002849.1	ATP-binding cassette sub-family D member 3 isoform a [Homo sapiens]
O75369	case2-VS-control	1.0319	0.122974	8.39119	8	3.09e-05	0.000312432	Up	O75369	Filamin-B OS=Homo sapiens OX=9606 GN=FLNB PE=1 SV=2	100	0	NP_001448.2	filamin-B isoform 2 [Homo sapiens]
O00767	case2-VS-control	1.31939	0.157411	8.38182	8	3.12e-05	0.000314292	Up	O00767	Acyl-CoA desaturase OS=Homo sapiens OX=9606 GN=SCD PE=1 SV=2	100	0	NP_005054.3	acyl-CoA desaturase [Homo sapiens]
Q08211	case2-VS-control	1.00115	0.119631	8.36861	8	3.15e-05	0.00031703	Up	Q08211	ATP-dependent RNA helicase A OS=Homo sapiens OX=9606 GN=DHX9 PE=1 SV=4	100	0	NP_001348.2	ATP-dependent RNA helicase A [Homo sapiens]
Q14118	case2-VS-control	-1.4037	0.167771	-8.3668	8	3.16e-05	0.00031703	Down	Q14118	Dystroglycan OS=Homo sapiens OX=9606 GN=DAG1 PE=1 SV=2	100	0	Q14118.2	RecName: Full=Dystroglycan; AltName: Full=Dystrophin-associated glycoprotein 1; Contains: RecName: Full=Alpha-dystroglycan; Short=Alpha-DG; Contains: RecName: Full=Beta-dystroglycan; Short=Beta-DG; Flags: Precursor
P04179	case2-VS-control	-1.49412	0.179814	-8.30924	8	3.32e-05	0.000332592	Down	P04179	Superoxide dismutase [Mn], mitochondrial OS=Homo sapiens OX=9606 GN=SOD2 PE=1 SV=3	100	5e-166	NP_000627.2	superoxide dismutase [Mn], mitochondrial isoform A precursor [Homo sapiens]
Q9UHD9	case2-VS-control	-1.39432	0.16793	-8.30299	8	3.34e-05	0.00033369	Down	Q9UHD9	Ubiquilin-2 OS=Homo sapiens OX=9606 GN=UBQLN2 PE=1 SV=2	100	0	NP_038472.2	ubiquilin-2 [Homo sapiens]
Q15904	case2-VS-control	-1.21645	0.146606	-8.29742	8	3.35e-05	0.000334594	Down	Q15904	V-type proton ATPase subunit S1 OS=Homo sapiens OX=9606 GN=ATP6AP1 PE=1 SV=2	100	0	NP_001174.2	V-type proton ATPase subunit S1 precursor [Homo sapiens]
Q6UN15	case2-VS-control	1.15784	0.139606	8.29367	8	3.37e-05	0.000334971	Up	Q6UN15	Pre-mRNA 3'-end-processing factor FIP1 OS=Homo sapiens OX=9606 GN=FIP1L1 PE=1 SV=1	100	0	NP_112179.2	pre-mRNA 3'-end-processing factor FIP1 isoform 1 [Homo sapiens]
Q6P1J9	case2-VS-control	-0.91575	0.110492	-8.28791	8	3.38e-05	0.000335373	None	Q6P1J9	Parafibromin OS=Homo sapiens OX=9606 GN=CDC73 PE=1 SV=1	100	0	NP_666103.1	parafibromin [Mus musculus]
Q16719	case2-VS-control	1.26038	0.135158	9.32529	7	3.38e-05	0.000335373	Up	Q16719	Kynureninase OS=Homo sapiens OX=9606 GN=KYNU PE=1 SV=1	100	0	NP_003928.1	kynureninase isoform a [Homo sapiens]
Q8WYA6	case2-VS-control	-1.34072	0.16205	-8.27348	8	3.43e-05	0.000337406	Down	Q8WYA6	Beta-catenin-like protein 1 OS=Homo sapiens OX=9606 GN=CTNNBL1 PE=1 SV=1	100	0	NP_110517.2	beta-catenin-like protein 1 isoform 1 [Homo sapiens]
O15143	case2-VS-control	0.851391	0.102909	8.27328	8	3.43e-05	0.000337406	None	O15143	Actin-related protein 2/3 complex subunit 1B OS=Homo sapiens OX=9606 GN=ARPC1B PE=1 SV=3	100	0	NP_005711.1	actin-related protein 2/3 complex subunit 1B [Homo sapiens]
O94905	case2-VS-control	0.437236	0.05285	8.27316	8	3.43e-05	0.000337406	None	O94905	Erlin-2 OS=Homo sapiens OX=9606 GN=ERLIN2 PE=1 SV=1	100	0	NP_009106.1	erlin-2 isoform 1 [Homo sapiens]
P05141	case2-VS-control	0.610896	0.0739125	8.26513	8	3.45e-05	0.000339068	None	P05141	ADP/ATP translocase 2 OS=Homo sapiens OX=9606 GN=SLC25A5 PE=1 SV=7	100	0	AAH68199.1	SLC25A5 protein, partial [Homo sapiens]
Q969S9	case2-VS-control	-1.09341	0.132404	-8.25813	8	3.47e-05	0.000340432	Down	Q969S9	Ribosome-releasing factor 2, mitochondrial OS=Homo sapiens OX=9606 GN=GFM2 PE=1 SV=1	100	0	NP_115756.2	ribosome-releasing factor 2, mitochondrial isoform 1 [Homo sapiens]
Q5T8D3	case2-VS-control	0.797497	0.0967123	8.24607	8	3.51e-05	0.000343328	None	Q5T8D3	Acyl-CoA-binding domain-containing protein 5 OS=Homo sapiens OX=9606 GN=ACBD5 PE=1 SV=1	100	0	NP_001339500.1	acyl-CoA-binding domain-containing protein 5 isoform 19 [Homo sapiens]
O14773	case2-VS-control	-0.852363	0.103459	-8.23863	8	3.53e-05	0.000344442	None	O14773	Tripeptidyl-peptidase 1 OS=Homo sapiens OX=9606 GN=TPP1 PE=1 SV=2	100	0	EAW68685.1	tripeptidyl peptidase I, isoform CRA_a [Homo sapiens]
P09234	case2-VS-control	-1.23257	0.149628	-8.23758	8	3.54e-05	0.000344442	Down	P09234	U1 small nuclear ribonucleoprotein C OS=Homo sapiens OX=9606 GN=SNRPC PE=1 SV=1	100	1e-106	XP_011727472.1	PREDICTED: U1 small nuclear ribonucleoprotein C [Macaca nemestrina]
Q9NX40	case2-VS-control	1.08501	0.131843	8.22957	8	3.56e-05	0.000346146	Up	Q9NX40	OCIA domain-containing protein 1 OS=Homo sapiens OX=9606 GN=OCIAD1 PE=1 SV=1	100	0	NP_060300.1	OCIA domain-containing protein 1 isoform 1 [Homo sapiens]
Q96CW1	case2-VS-control	-0.779905	0.0949445	-8.21433	8	3.61e-05	0.000350086	None	Q96CW1	AP-2 complex subunit mu OS=Homo sapiens OX=9606 GN=AP2M1 PE=1 SV=2	100	0	NP_033809.1	AP-2 complex subunit mu isoform 1 [Mus musculus]
Q9NX57	case2-VS-control	0.918567	0.0846531	10.851	6	3.63e-05	0.00035137	None	Q9NX57	Ras-related protein Rab-20 OS=Homo sapiens OX=9606 GN=RAB20 PE=1 SV=1	100	9e-177	NP_060287.1	ras-related protein Rab-20 [Homo sapiens]
Q9NTI5	case2-VS-control	1.89935	0.175173	10.8427	6	3.65e-05	0.000351976	Up	Q9NTI5	Sister chromatid cohesion protein PDS5 homolog B OS=Homo sapiens OX=9606 GN=PDS5B PE=1 SV=1	100	0	NP_055847.1	sister chromatid cohesion protein PDS5 homolog B [Homo sapiens]
Q9UMZ2	case2-VS-control	1.06814	0.11588	9.21771	7	3.65e-05	0.000351976	Up	Q9UMZ2	Synergin gamma OS=Homo sapiens OX=9606 GN=SYNRG PE=1 SV=2	100	0	NP_009178.3	synergin gamma isoform 1 [Homo sapiens]
Q9H6R6	case2-VS-control	1.55573	0.189848	8.19459	8	3.67e-05	0.000353269	Up	Q9H6R6	Palmitoyltransferase ZDHHC6 OS=Homo sapiens OX=9606 GN=ZDHHC6 PE=1 SV=1	100	0	NP_071939.1	palmitoyltransferase ZDHHC6 isoform 1 [Homo sapiens]
Q96ER9	case2-VS-control	0.786807	0.0963123	8.16933	8	3.75e-05	0.000360493	None	Q96ER9	Coiled-coil domain-containing protein 51 OS=Homo sapiens OX=9606 GN=CCDC51 PE=1 SV=2	100	0	NP_078937.3	coiled-coil domain-containing protein 51 isoform 1 [Homo sapiens]
Q09028	case2-VS-control	-0.736962	0.09026	-8.16489	8	3.77e-05	0.000361165	None	Q09028	Histone-binding protein RBBP4 OS=Homo sapiens OX=9606 GN=RBBP4 PE=1 SV=3	100	0	XP_008271973.1	PREDICTED: histone-binding protein RBBP4 [Oryctolagus cuniculus]
Q9BTE7	case2-VS-control	-1.24236	0.152428	-8.15045	8	3.82e-05	0.000365056	Down	Q9BTE7	DCN1-like protein 5 OS=Homo sapiens OX=9606 GN=DCUN1D5 PE=1 SV=1	100	1e-177	NP_115675.1	DCN1-like protein 5 isoform a [Homo sapiens]
Q9H0U3	case2-VS-control	0.865676	0.106357	8.13935	8	3.86e-05	0.00036791	None	Q9H0U3	Magnesium transporter protein 1 OS=Homo sapiens OX=9606 GN=MAGT1 PE=1 SV=1	100	0	Q9H0U3.1	RecName: Full=Magnesium transporter protein 1; Short=MagT1; AltName: Full=Implantation-associated protein; Short=IAP; Flags: Precursor
Q8N8A2	case2-VS-control	3.65902	0.0955016	38.3137	3	3.91e-05	0.000372038	Up	Q8N8A2	Serine/threonine-protein phosphatase 6 regulatory ankyrin repeat subunit B OS=Homo sapiens OX=9606 GN=ANKRD44 PE=1 SV=3	100	0	NP_001182073.1	serine/threonine-protein phosphatase 6 regulatory ankyrin repeat subunit B isoform A [Homo sapiens]
Q8TDN6	case2-VS-control	-0.891435	0.109754	-8.12215	8	3.91e-05	0.000372038	None	Q8TDN6	Ribosome biogenesis protein BRX1 homolog OS=Homo sapiens OX=9606 GN=BRIX1 PE=1 SV=2	100	0	NP_060791.3	ribosome biogenesis protein BRX1 homolog [Homo sapiens]
Q10713	case2-VS-control	-1.00385	0.123738	-8.11269	8	3.95e-05	0.000374411	Down	Q10713	Mitochondrial-processing peptidase subunit alpha OS=Homo sapiens OX=9606 GN=PMPCA PE=1 SV=2	100	0	BAA09472.2	KIAA0123, partial [Homo sapiens]
Q96MU7	case2-VS-control	0.4259	0.0525297	8.1078	8	3.97e-05	0.000375278	None	Q96MU7	YTH domain-containing protein 1 OS=Homo sapiens OX=9606 GN=YTHDC1 PE=1 SV=3	100	0	NP_001026902.1	YTH domain-containing protein 1 isoform 1 [Homo sapiens]
Q9Y2Z4	case2-VS-control	0.793473	0.0979304	8.10242	8	3.98e-05	0.000375617	None	Q9Y2Z4	Tyrosine--tRNA ligase, mitochondrial OS=Homo sapiens OX=9606 GN=YARS2 PE=1 SV=2	100	0	NP_001035526.1	tyrosine--tRNA ligase, mitochondrial precursor [Homo sapiens]
Q99766	case2-VS-control	1.30466	0.161025	8.1022	8	3.99e-05	0.000375617	Up	Q99766	ATP synthase subunit s, mitochondrial OS=Homo sapiens OX=9606 GN=ATP5S PE=1 SV=3	100	1e-159	NP_001003803.1	ATP synthase subunit s, mitochondrial isoform a precursor [Homo sapiens]
P13797	case2-VS-control	1.65071	0.204236	8.08237	8	4.06e-05	0.000381275	Up	P13797	Plastin-3 OS=Homo sapiens OX=9606 GN=PLS3 PE=1 SV=4	100	0	NP_005023.2	plastin-3 isoform 1 [Homo sapiens]
A6NDG6	case2-VS-control	1.79521	0.168719	10.6402	6	4.06e-05	0.000381275	Up	A6NDG6	Glycerol-3-phosphate phosphatase OS=Homo sapiens OX=9606 GN=PGP PE=1 SV=1	100	0	NP_001035830.1	glycerol-3-phosphate phosphatase [Homo sapiens]
O75110	case2-VS-control	3.59772	0.267811	13.4338	5	4.09e-05	0.000383112	Up	O75110	Probable phospholipid-transporting ATPase IIA OS=Homo sapiens OX=9606 GN=ATP9A PE=1 SV=3	99.904	0	XP_008012122.1	PREDICTED: probable phospholipid-transporting ATPase IIA isoform X1 [Chlorocebus sabaeus]
P30044	case2-VS-control	-0.654671	0.0811145	-8.07095	8	4.1e-05	0.000383112	None	P30044	Peroxiredoxin-5, mitochondrial OS=Homo sapiens OX=9606 GN=PRDX5 PE=1 SV=4	100	3e-152	P30044.4	RecName: Full=Peroxiredoxin-5, mitochondrial; AltName: Full=Alu corepressor 1; AltName: Full=Antioxidant enzyme B166; Short=AOEB166; AltName: Full=Liver tissue 2D-page spot 71B; AltName: Full=PLP; AltName: Full=Peroxiredoxin V; Short=Prx-V; AltName: Full=Peroxisomal antioxidant enzyme; AltName: Full=TPx type VI; AltName: Full=Thioredoxin peroxidase PMP20; Flags: Precursor
Q96HY7	case2-VS-control	-1.75039	0.216989	-8.06673	8	4.11e-05	0.000383191	Down	Q96HY7	Probable 2-oxoglutarate dehydrogenase E1 component DHKTD1, mitochondrial OS=Homo sapiens OX=9606 GN=DHTKD1 PE=1 SV=2	100	0	Q96HY7.2	RecName: Full=Probable 2-oxoglutarate dehydrogenase E1 component DHKTD1, mitochondrial; AltName: Full=Dehydrogenase E1 and transketolase domain-containing protein 1; Flags: Precursor
Q8TB37	case2-VS-control	0.657291	0.0814869	8.06621	8	4.12e-05	0.000383191	None	Q8TB37	Iron-sulfur protein NUBPL OS=Homo sapiens OX=9606 GN=NUBPL PE=1 SV=3	100	0	NP_079428.2	iron-sulfur protein NUBPL isoform 1 precursor [Homo sapiens]
P32519	case2-VS-control	2.23515	0.247074	9.04647	7	4.13e-05	0.000383356	Up	P32519	ETS-related transcription factor Elf-1 OS=Homo sapiens OX=9606 GN=ELF1 PE=1 SV=2	100	0	NP_758961.1	ETS-related transcription factor Elf-1 isoform a [Homo sapiens]
Q92506	case2-VS-control	1.30673	0.16213	8.05977	8	4.14e-05	0.00038386	Up	Q92506	Estradiol 17-beta-dehydrogenase 8 OS=Homo sapiens OX=9606 GN=HSD17B8 PE=1 SV=2	100	0	NP_055049.1	estradiol 17-beta-dehydrogenase 8 [Homo sapiens]
O00499	case2-VS-control	-2.68068	0.297084	-9.02331	7	4.19e-05	0.000387953	Down	O00499	Myc box-dependent-interacting protein 1 OS=Homo sapiens OX=9606 GN=BIN1 PE=1 SV=1	100	0	NP_647593.1	myc box-dependent-interacting protein 1 isoform 1 [Homo sapiens]
O75844	case2-VS-control	0.786179	0.0977414	8.04345	8	4.2e-05	0.000387953	None	O75844	CAAX prenyl protease 1 homolog OS=Homo sapiens OX=9606 GN=ZMPSTE24 PE=1 SV=2	100	0	NP_005848.2	CAAX prenyl protease 1 homolog [Homo sapiens]
Q9Y605	case2-VS-control	-1.32943	0.165383	-8.03849	8	4.22e-05	0.000388907	Down	Q9Y605	MORF4 family-associated protein 1 OS=Homo sapiens OX=9606 GN=MRFAP1 PE=1 SV=1	100	1e-85	NP_150638.1	MORF4 family-associated protein 1 isoform a [Homo sapiens]
Q9UJS0	case2-VS-control	0.682765	0.0849851	8.03394	8	4.24e-05	0.000389719	None	Q9UJS0	Calcium-binding mitochondrial carrier protein Aralar2 OS=Homo sapiens OX=9606 GN=SLC25A13 PE=1 SV=2	100	0	NP_055066.1	calcium-binding mitochondrial carrier protein Aralar2 isoform 2 [Homo sapiens]
Q9BV23	case2-VS-control	2.71531	0.33812	8.03062	8	4.25e-05	0.000390106	Up	Q9BV23	Monoacylglycerol lipase ABHD6 OS=Homo sapiens OX=9606 GN=ABHD6 PE=1 SV=1	100	0	NP_065727.4	monoacylglycerol lipase ABHD6 [Homo sapiens]
Q9UG56	case2-VS-control	1.31544	0.124902	10.5318	6	4.31e-05	0.000394729	Up	Q9UG56	Phosphatidylserine decarboxylase proenzyme, mitochondrial OS=Homo sapiens OX=9606 GN=PISD PE=2 SV=4	100	0	NP_001313340.1	phosphatidylserine decarboxylase proenzyme, mitochondrial isoform a [Homo sapiens]
Q9HD20	case2-VS-control	0.897055	0.112498	7.97397	8	4.47e-05	0.000408879	None	Q9HD20	Manganese-transporting ATPase 13A1 OS=Homo sapiens OX=9606 GN=ATP13A1 PE=1 SV=2	100	0	NP_065143.2	manganese-transporting ATPase 13A1 [Homo sapiens]
Q16854	case2-VS-control	-1.95272	0.245919	-7.94051	8	4.61e-05	0.0004206	Down	Q16854	Deoxyguanosine kinase, mitochondrial OS=Homo sapiens OX=9606 GN=DGUOK PE=1 SV=2	100	0	NP_550438.1	deoxyguanosine kinase, mitochondrial isoform a precursor [Homo sapiens]
Q10472	case2-VS-control	1.47325	0.185935	7.92349	8	4.68e-05	0.000425548	Up	Q10472	Polypeptide N-acetylgalactosaminyltransferase 1 OS=Homo sapiens OX=9606 GN=GALNT1 PE=1 SV=1	100	0	NP_065207.2	polypeptide N-acetylgalactosaminyltransferase 1 [Homo sapiens]
O00629	case2-VS-control	-1.70076	0.214659	-7.92308	8	4.68e-05	0.000425548	Down	O00629	Importin subunit alpha-3 OS=Homo sapiens OX=9606 GN=KPNA4 PE=1 SV=1	100	0	NP_002259.1	importin subunit alpha-3 [Homo sapiens]
Q14677	case2-VS-control	-0.483567	0.0610481	-7.92109	8	4.69e-05	0.000425548	None	Q14677	Clathrin interactor 1 OS=Homo sapiens OX=9606 GN=CLINT1 PE=1 SV=1	100	0	NP_055481.1	clathrin interactor 1 isoform 2 [Homo sapiens]
Q63ZY3	case2-VS-control	-2.01243	0.255452	-7.87793	8	4.88e-05	0.000441708	Down	Q63ZY3	KN motif and ankyrin repeat domain-containing protein 2 OS=Homo sapiens OX=9606 GN=KANK2 PE=1 SV=1	100	0	NP_001129663.1	KN motif and ankyrin repeat domain-containing protein 2 isoform 2 [Homo sapiens]
Q9BXP2	case2-VS-control	0.593087	0.0753218	7.87405	8	4.89e-05	0.000442406	None	Q9BXP2	Solute carrier family 12 member 9 OS=Homo sapiens OX=9606 GN=SLC12A9 PE=1 SV=1	100	0	NP_064631.2	solute carrier family 12 member 9 isoform 1 [Homo sapiens]
Q15811	case2-VS-control	-0.927321	0.117974	-7.86036	8	4.96e-05	0.00044709	None	Q15811	Intersectin-1 OS=Homo sapiens OX=9606 GN=ITSN1 PE=1 SV=3	100	0	NP_003015.2	intersectin-1 isoform ITSN-l [Homo sapiens]
Q9NZR2	case2-VS-control	-3.796	0.431977	-8.78749	7	4.98e-05	0.000448543	Down	Q9NZR2	Low-density lipoprotein receptor-related protein 1B OS=Homo sapiens OX=9606 GN=LRP1B PE=1 SV=2	100	0	NP_061027.2	low-density lipoprotein receptor-related protein 1B precursor [Homo sapiens]
Q14181	case2-VS-control	-1.57342	0.200449	-7.84947	8	5.01e-05	0.000449803	Down	Q14181	DNA polymerase alpha subunit B OS=Homo sapiens OX=9606 GN=POLA2 PE=1 SV=2	100	0	NP_002680.2	DNA polymerase alpha subunit B [Homo sapiens]
P04181	case2-VS-control	1.07379	0.137021	7.83668	8	5.06e-05	0.000453616	Up	P04181	Ornithine aminotransferase, mitochondrial OS=Homo sapiens OX=9606 GN=OAT PE=1 SV=1	100	0	NP_000265.1	ornithine aminotransferase, mitochondrial isoform 1 precursor [Homo sapiens]
Q8N6L1	case2-VS-control	0.880884	0.100523	8.76302	7	5.07e-05	0.000453616	None	Q8N6L1	Keratinocyte-associated protein 2 OS=Homo sapiens OX=9606 GN=KRTCAP2 PE=1 SV=2	100	3e-92	Q8N6L1.2	RecName: Full=Keratinocyte-associated protein 2; Short=KCP-2
O14735	case2-VS-control	0.891749	0.113832	7.83389	8	5.08e-05	0.000453616	None	O14735	CDP-diacylglycerol--inositol 3-phosphatidyltransferase OS=Homo sapiens OX=9606 GN=CDIPT PE=1 SV=1	100	1e-154	NP_006310.1	CDP-diacylglycerol--inositol 3-phosphatidyltransferase isoform 1 [Homo sapiens]
Q15291	case2-VS-control	-0.749681	0.0958933	-7.81787	8	5.15e-05	0.000458385	None	Q15291	Retinoblastoma-binding protein 5 OS=Homo sapiens OX=9606 GN=RBBP5 PE=1 SV=2	100	0	NP_005048.2	retinoblastoma-binding protein 5 isoform 1 [Homo sapiens]
Q13813	case2-VS-control	-1.26941	0.162437	-7.81478	8	5.17e-05	0.000458385	Down	Q13813	Spectrin alpha chain, non-erythrocytic 1 OS=Homo sapiens OX=9606 GN=SPTAN1 PE=1 SV=3	100	0	XP_006717312.1	PREDICTED: spectrin alpha chain, non-erythrocytic 1 isoform X6 [Homo sapiens]
Q8N4Q0	case2-VS-control	-1.0088	0.1291	-7.81411	8	5.17e-05	0.000458385	Down	Q8N4Q0	Prostaglandin reductase 3 OS=Homo sapiens OX=9606 GN=ZADH2 PE=1 SV=1	100	0	NP_787103.1	prostaglandin reductase 3 isoform 1 [Homo sapiens]
P31040	case2-VS-control	-1.31082	0.167752	-7.81407	8	5.17e-05	0.000458385	Down	P31040	Succinate dehydrogenase [ubiquinone] flavoprotein subunit, mitochondrial OS=Homo sapiens OX=9606 GN=SDHA PE=1 SV=2	99.849	0	BAD92228.1	succinate dehydrogenase complex, subunit A, flavoprotein precursor variant, partial [Homo sapiens]
P17844	case2-VS-control	0.449442	0.0575545	7.80899	8	5.19e-05	0.000459645	None	P17844	Probable ATP-dependent RNA helicase DDX5 OS=Homo sapiens OX=9606 GN=DDX5 PE=1 SV=1	100	0	NP_004387.1	probable ATP-dependent RNA helicase DDX5 isoform a [Homo sapiens]
P49585	case2-VS-control	0.748955	0.0960021	7.80145	8	5.23e-05	0.000461952	None	P49585	Choline-phosphate cytidylyltransferase A OS=Homo sapiens OX=9606 GN=PCYT1A PE=1 SV=2	100	0	NP_005008.2	choline-phosphate cytidylyltransferase A [Homo sapiens]
P51148	case2-VS-control	-0.624391	0.080189	-7.78649	8	5.3e-05	0.000467453	None	P51148	Ras-related protein Rab-5C OS=Homo sapiens OX=9606 GN=RAB5C PE=1 SV=2	100	2e-161	NP_004574.2	ras-related protein Rab-5C isoform a [Homo sapiens]
Q96JP2	case2-VS-control	-2.13536	0.0156617	-136.343	2	5.38e-05	0.000473268	Down	Q96JP2	Unconventional myosin-XVB OS=Homo sapiens OX=9606 GN=MYO15B PE=1 SV=3	99.935	0	EAW89288.1	hCG1987119, isoform CRA_c [Homo sapiens]
Q8NBN3	case2-VS-control	1.17825	0.151924	7.75553	8	5.46e-05	0.000479146	Up	Q8NBN3	Transmembrane protein 87A OS=Homo sapiens OX=9606 GN=TMEM87A PE=1 SV=3	100	0	NP_056312.2	transmembrane protein 87A isoform 1 precursor [Homo sapiens]
Q16775	case2-VS-control	-0.849349	0.109741	-7.73958	8	5.54e-05	0.000485334	None	Q16775	Hydroxyacylglutathione hydrolase, mitochondrial OS=Homo sapiens OX=9606 GN=HAGH PE=1 SV=2	100	0	NP_005317.2	hydroxyacylglutathione hydrolase, mitochondrial isoform 1 precursor [Homo sapiens]
O00468	case2-VS-control	0.702459	0.0908557	7.73159	8	5.58e-05	0.000488006	None	O00468	Agrin OS=Homo sapiens OX=9606 GN=AGRN PE=1 SV=6	100	0	NP_001292204.1	agrin isoform 1 precursor [Homo sapiens]
Q9H8H3	case2-VS-control	-1.58955	0.158	-10.0604	6	5.6e-05	0.000488677	Down	Q9H8H3	Methyltransferase-like protein 7A OS=Homo sapiens OX=9606 GN=METTL7A PE=1 SV=1	100	0	NP_054752.3	methyltransferase-like protein 7A precursor [Homo sapiens]
Q9NR46	case2-VS-control	-1.54228	0.199663	-7.72442	8	5.62e-05	0.000489403	Down	Q9NR46	Endophilin-B2 OS=Homo sapiens OX=9606 GN=SH3GLB2 PE=1 SV=1	100	0	NP_064530.1	endophilin-B2 isoform b [Homo sapiens]
Q8TF65	case2-VS-control	1.72586	0.22356	7.7199	8	5.64e-05	0.000489762	Up	Q8TF65	PDZ domain-containing protein GIPC2 OS=Homo sapiens OX=9606 GN=GIPC2 PE=1 SV=1	100	0	NP_060125.4	PDZ domain-containing protein GIPC2 isoform 1 [Homo sapiens]
O95563	case2-VS-control	0.738176	0.095624	7.71956	8	5.64e-05	0.000489762	None	O95563	Mitochondrial pyruvate carrier 2 OS=Homo sapiens OX=9606 GN=MPC2 PE=1 SV=1	100	3e-89	NP_056230.1	mitochondrial pyruvate carrier 2 [Homo sapiens]
O43707	case2-VS-control	1.57232	0.204072	7.70474	8	5.72e-05	0.000495605	Up	O43707	Alpha-actinin-4 OS=Homo sapiens OX=9606 GN=ACTN4 PE=1 SV=2	100	0	NP_004915.2	alpha-actinin-4 isoform 1 [Homo sapiens]
Q9Y2Y0	case2-VS-control	-3.36413	0.188096	-17.8852	4	5.74e-05	0.000496739	Down	Q9Y2Y0	ADP-ribosylation factor-like protein 2-binding protein OS=Homo sapiens OX=9606 GN=ARL2BP PE=1 SV=1	100	6e-116	NP_036238.1	ADP-ribosylation factor-like protein 2-binding protein [Homo sapiens]
Q8N9F7	case2-VS-control	-1.17554	0.117415	-10.0118	6	5.75e-05	0.000496739	Down	Q8N9F7	Lysophospholipase D GDPD1 OS=Homo sapiens OX=9606 GN=GDPD1 PE=1 SV=2	100	0	NP_872375.2	glycerophosphodiester phosphodiesterase domain-containing protein 1 isoform 1 [Homo sapiens]
Q9Y2K7	case2-VS-control	-2.22098	0.258772	-8.58275	7	5.8e-05	0.000500082	Down	Q9Y2K7	Lysine-specific demethylase 2A OS=Homo sapiens OX=9606 GN=KDM2A PE=1 SV=3	100	0	NP_036440.1	lysine-specific demethylase 2A isoform a [Homo sapiens]
Q9UEY8	case2-VS-control	2.01574	0.20214	9.97201	6	5.89e-05	0.000506265	Up	Q9UEY8	Gamma-adducin OS=Homo sapiens OX=9606 GN=ADD3 PE=1 SV=1	100	0	NP_058432.1	gamma-adducin isoform a [Homo sapiens]
Q8NBM4	case2-VS-control	0.984131	0.128316	7.66957	8	5.91e-05	0.00050731	None	Q8NBM4	Ubiquitin-associated domain-containing protein 2 OS=Homo sapiens OX=9606 GN=UBAC2 PE=1 SV=1	100	0	NP_001137544.1	ubiquitin-associated domain-containing protein 2 isoform 1 precursor [Homo sapiens]
Q9GZM8	case2-VS-control	-1.10071	0.14406	-7.64067	8	6.07e-05	0.000520192	Down	Q9GZM8;Q9NXR1	Nuclear distribution protein nudE-like 1 OS=Homo sapiens OX=9606 GN=NDEL1 PE=1 SV=1	100	0	NP_110435.1	nuclear distribution protein nudE-like 1 isoform B [Homo sapiens]
Q7L9B9	case2-VS-control	-1.09884	0.110847	-9.91313	6	6.09e-05	0.000520739	Down	Q7L9B9	Endonuclease/exonuclease/phosphatase family domain-containing protein 1 OS=Homo sapiens OX=9606 GN=EEPD1 PE=1 SV=2	100	0	NP_085139.2	endonuclease/exonuclease/phosphatase family domain-containing protein 1 [Homo sapiens]
Q6P1L8	case2-VS-control	0.851585	0.111534	7.6352	8	6.1e-05	0.000520929	None	Q6P1L8	39S ribosomal protein L14, mitochondrial OS=Homo sapiens OX=9606 GN=MRPL14 PE=1 SV=1	100	7e-105	NP_115487.2	39S ribosomal protein L14, mitochondrial isoform a precursor [Homo sapiens]
Q9BTE3	case2-VS-control	1.9806	0.259524	7.63166	8	6.12e-05	0.000521557	Up	Q9BTE3	Mini-chromosome maintenance complex-binding protein OS=Homo sapiens OX=9606 GN=MCMBP PE=1 SV=2	100	0	NP_079110.1	mini-chromosome maintenance complex-binding protein isoform 1 [Homo sapiens]
P36543	case2-VS-control	0.72396	0.0948839	7.62996	8	6.13e-05	0.000521557	None	P36543	V-type proton ATPase subunit E 1 OS=Homo sapiens OX=9606 GN=ATP6V1E1 PE=1 SV=1	100	2e-162	NP_001687.1	V-type proton ATPase subunit E 1 isoform a [Homo sapiens]
Q8NBJ5	case2-VS-control	-0.837119	0.109853	-7.62032	8	6.19e-05	0.00052531	None	Q8NBJ5	Procollagen galactosyltransferase 1 OS=Homo sapiens OX=9606 GN=COLGALT1 PE=1 SV=1	100	0	NP_078932.2	procollagen galactosyltransferase 1 precursor [Homo sapiens]
Q99470	case2-VS-control	-0.831161	0.109186	-7.61232	8	6.23e-05	0.000528292	None	Q99470	Stromal cell-derived factor 2 OS=Homo sapiens OX=9606 GN=SDF2 PE=1 SV=2	100	8e-156	NP_008854.2	stromal cell-derived factor 2 precursor [Homo sapiens]
O95817	case2-VS-control	-1.25289	0.16464	-7.60991	8	6.25e-05	0.000528512	Down	O95817	BAG family molecular chaperone regulator 3 OS=Homo sapiens OX=9606 GN=BAG3 PE=1 SV=3	100	0	NP_004272.2	BAG family molecular chaperone regulator 3 [Homo sapiens]
O15321	case2-VS-control	1.56757	0.206457	7.59271	8	6.35e-05	0.000535469	Up	O15321	Transmembrane 9 superfamily member 1 OS=Homo sapiens OX=9606 GN=TM9SF1 PE=2 SV=2	100	0	BAH13215.1	unnamed protein product [Homo sapiens]
Q9P289	case2-VS-control	0.928572	0.122308	7.59206	8	6.35e-05	0.000535469	None	Q9P289;Q9Y6E0	Serine/threonine-protein kinase 26 OS=Homo sapiens OX=9606 GN=STK26 PE=1 SV=2	100	0	NP_057626.2	serine/threonine-protein kinase 26 isoform 1 [Homo sapiens]
P42695	case2-VS-control	-1.03688	0.136854	-7.57648	8	6.45e-05	0.00054237	Down	P42695	Condensin-2 complex subunit D3 OS=Homo sapiens OX=9606 GN=NCAPD3 PE=1 SV=2	100	0	NP_056076.1	condensin-2 complex subunit D3 [Homo sapiens]
Q96GZ6	case2-VS-control	-0.764178	0.101096	-7.55891	8	6.55e-05	0.000550404	None	Q96GZ6	Solute carrier family 41 member 3 OS=Homo sapiens OX=9606 GN=SLC41A3 PE=1 SV=2	100	0	XP_005247619.1	PREDICTED: solute carrier family 41 member 3 isoform X2 [Homo sapiens]
O60684	case2-VS-control	-0.737431	0.0977574	-7.54348	8	6.65e-05	0.000556536	None	O60684	Importin subunit alpha-7 OS=Homo sapiens OX=9606 GN=KPNA6 PE=1 SV=1	100	0	XP_011829425.1	PREDICTED: importin subunit alpha-7 isoform X1 [Mandrillus leucophaeus]
Q9Y251	case2-VS-control	1.47126	0.121001	12.1591	5	6.65e-05	0.000556536	Up	Q9Y251	Heparanase OS=Homo sapiens OX=9606 GN=HPSE PE=1 SV=2	100	0	NP_006656.2	heparanase isoform 1 preproprotein [Homo sapiens]
Q96L92	case2-VS-control	1.81987	0.241383	7.53937	8	6.67e-05	0.000557597	Up	Q96L92	Sorting nexin-27 OS=Homo sapiens OX=9606 GN=SNX27 PE=1 SV=2	100	0	NP_001317652.1	sorting nexin-27 isoform 1 [Homo sapiens]
O14657	case2-VS-control	-1.83812	0.244282	-7.52458	8	6.77e-05	0.000564415	Down	O14657	Torsin-1B OS=Homo sapiens OX=9606 GN=TOR1B PE=1 SV=2	100	0	NP_055321.1	torsin-1B isoform 1 precursor [Homo sapiens]
Q9BX46	case2-VS-control	-1.46947	0.17544	-8.37593	7	6.79e-05	0.000565241	Down	Q9BX46;Q9H0Z9	RNA-binding protein 24 OS=Homo sapiens OX=9606 GN=RBM24 PE=1 SV=1	100	4e-165	NP_001137414.1	RNA-binding protein 24 isoform 1 [Homo sapiens]
Q92522	case2-VS-control	-1.299	0.172931	-7.51166	8	6.85e-05	0.000569293	Down	Q92522	Histone H1x OS=Homo sapiens OX=9606 GN=H1FX PE=1 SV=1	100	3e-146	NP_006017.1	histone H1x [Homo sapiens]
O94887	case2-VS-control	-0.870799	0.11619	-7.49459	8	6.96e-05	0.000577531	None	O94887	FERM, ARHGEF and pleckstrin domain-containing protein 2 OS=Homo sapiens OX=9606 GN=FARP2 PE=1 SV=3	100	0	NP_055623.1	FERM, RhoGEF and pleckstrin domain-containing protein 2 isoform a [Homo sapiens]
Q15365	case2-VS-control	0.729513	0.0973679	7.49234	8	6.98e-05	0.000577729	None	Q15365	Poly(rC)-binding protein 1 OS=Homo sapiens OX=9606 GN=PCBP1 PE=1 SV=2	100	0	NP_035995.1	poly(rC)-binding protein 1 [Mus musculus]
O95302	case2-VS-control	-1.06583	0.142716	-7.46819	8	7.14e-05	0.000590065	Down	O95302	Peptidyl-prolyl cis-trans isomerase FKBP9 OS=Homo sapiens OX=9606 GN=FKBP9 PE=1 SV=2	100	0	NP_009201.2	peptidyl-prolyl cis-trans isomerase FKBP9 isoform 1 precursor [Homo sapiens]
P30461	case2-VS-control	-8.59134	0.717309	-11.9772	5	7.16e-05	0.000590077	Down	P30461	HLA class I histocompatibility antigen, B-13 alpha chain OS=Homo sapiens OX=9606 GN=HLA-B PE=1 SV=1	100	0	P30461.1	RecName: Full=HLA class I histocompatibility antigen, B-13 alpha chain; AltName: Full=MHC class I antigen B*13; Flags: Precursor
Q969J3	case2-VS-control	1.13657	0.136834	8.30623	7	7.17e-05	0.000590077	Up	Q969J3	BLOC-1-related complex subunit 5 OS=Homo sapiens OX=9606 GN=BORCS5 PE=1 SV=1	100	2e-142	NP_477517.1	BLOC-1-related complex subunit 5 isoform 1 [Homo sapiens]
Q92552	case2-VS-control	-0.869671	0.116934	-7.4373	8	7.35e-05	0.00060443	None	Q92552	28S ribosomal protein S27, mitochondrial OS=Homo sapiens OX=9606 GN=MRPS27 PE=1 SV=3	100	0	NP_055899.2	28S ribosomal protein S27, mitochondrial isoform 2 [Homo sapiens]
Q15599	case2-VS-control	-1.19314	0.16097	-7.41215	8	7.53e-05	0.00061801	Down	Q15599	Na(+)/H(+) exchange regulatory cofactor NHE-RF2 OS=Homo sapiens OX=9606 GN=SLC9A3R2 PE=1 SV=2	100	0	NP_001123484.1	Na(+)/H(+) exchange regulatory cofactor NHE-RF2 isoform a [Homo sapiens]
Q6P1M0	case2-VS-control	0.939316	0.126852	7.40479	8	7.58e-05	0.000621271	None	Q6P1M0	Long-chain fatty acid transport protein 4 OS=Homo sapiens OX=9606 GN=SLC27A4 PE=1 SV=1	100	0	NP_005085.2	long-chain fatty acid transport protein 4 [Homo sapiens]
O95202	case2-VS-control	0.826178	0.111643	7.40017	8	7.62e-05	0.000621917	None	O95202	Mitochondrial proton/calcium exchanger protein OS=Homo sapiens OX=9606 GN=LETM1 PE=1 SV=1	100	0	NP_036450.1	mitochondrial proton/calcium exchanger protein precursor [Homo sapiens]
Q15120	case2-VS-control	2.01601	0.245043	8.22716	7	7.62e-05	0.000621917	Up	Q15120	[Pyruvate dehydrogenase (acetyl-transferring)] kinase isozyme 3, mitochondrial OS=Homo sapiens OX=9606 GN=PDK3 PE=1 SV=1	100	0	NP_005382.1	pyruvate dehydrogenase kinase, isozyme 3 isoform 2 precursor [Homo sapiens]
Q8WUM4	case2-VS-control	1.39915	0.189226	7.39405	8	7.66e-05	0.000624375	Up	Q8WUM4	Programmed cell death 6-interacting protein OS=Homo sapiens OX=9606 GN=PDCD6IP PE=1 SV=1	100	0	NP_037506.2	programmed cell death 6-interacting protein isoform 1 [Homo sapiens]
P23193	case2-VS-control	1.42269	0.192475	7.39155	8	7.68e-05	0.000624772	Up	P23193	Transcription elongation factor A protein 1 OS=Homo sapiens OX=9606 GN=TCEA1 PE=1 SV=2	100	0	NP_006747.1	transcription elongation factor A protein 1 isoform 1 [Homo sapiens]
P41252	case2-VS-control	1.08964	0.147759	7.37442	8	7.81e-05	0.000634002	Up	P41252	Isoleucine--tRNA ligase, cytoplasmic OS=Homo sapiens OX=9606 GN=IARS PE=1 SV=2	100	0	BAA05835.1	isoleucyl-tRNA synthetase [Homo sapiens]
P50443	case2-VS-control	1.38153	0.169233	8.16349	7	8.01e-05	0.000649101	Up	P50443	Sulfate transporter OS=Homo sapiens OX=9606 GN=SLC26A2 PE=1 SV=2	100	0	NP_000103.2	sulfate transporter [Homo sapiens]
Q04695	case2-VS-control	-1.11558	0.151907	-7.34379	8	8.04e-05	0.000650653	Down	Q04695	Keratin, type I cytoskeletal 17 OS=Homo sapiens OX=9606 GN=KRT17 PE=1 SV=2	100	0	NP_000413.1	keratin, type I cytoskeletal 17 [Homo sapiens]
Q93050	case2-VS-control	-0.685996	0.0935841	-7.33026	8	8.15e-05	0.000658036	None	Q93050	V-type proton ATPase 116 kDa subunit a isoform 1 OS=Homo sapiens OX=9606 GN=ATP6V0A1 PE=1 SV=3	100	0	NP_001123493.1	V-type proton ATPase 116 kDa subunit a isoform 1 isoform b [Homo sapiens]
Q9NVI7	case2-VS-control	0.706961	0.0965869	7.31943	8	8.23e-05	0.000663789	None	Q9NVI7	ATPase family AAA domain-containing protein 3A OS=Homo sapiens OX=9606 GN=ATAD3A PE=1 SV=2	100	0	NP_060658.3	ATPase family AAA domain-containing protein 3A isoform 1 [Homo sapiens]
O75914	case2-VS-control	1.85214	0.159656	11.6008	5	8.35e-05	0.000672379	Up	O75914	Serine/threonine-protein kinase PAK 3 OS=Homo sapiens OX=9606 GN=PAK3 PE=1 SV=2	100	0	NP_001009039.1	serine/threonine-protein kinase PAK 3 [Pan troglodytes]
P52294	case2-VS-control	-0.587986	0.0805885	-7.29615	8	8.42e-05	0.00067653	None	P52294	Importin subunit alpha-5 OS=Homo sapiens OX=9606 GN=KPNA1 PE=1 SV=3	100	0	NP_002255.3	importin subunit alpha-5 [Homo sapiens]
Q08209	case2-VS-control	1.45452	0.199662	7.2849	8	8.51e-05	0.000681175	Up	Q08209	Serine/threonine-protein phosphatase 2B catalytic subunit alpha isoform OS=Homo sapiens OX=9606 GN=PPP3CA PE=1 SV=1	100	0	NP_000935.1	serine/threonine-protein phosphatase 2B catalytic subunit alpha isoform isoform 1 [Homo sapiens]
Q9H1K1	case2-VS-control	-0.715246	0.0981976	-7.28374	8	8.52e-05	0.000681175	None	Q9H1K1	Iron-sulfur cluster assembly enzyme ISCU, mitochondrial OS=Homo sapiens OX=9606 GN=ISCU PE=1 SV=2	100	7e-119	NP_998760.1	iron-sulfur cluster assembly enzyme ISCU, mitochondrial isoform 2 precursor [Homo sapiens]
Q9BXS5	case2-VS-control	0.694626	0.0953671	7.28371	8	8.52e-05	0.000681175	None	Q9BXS5	AP-1 complex subunit mu-1 OS=Homo sapiens OX=9606 GN=AP1M1 PE=1 SV=3	100	0	NP_115882.1	AP-1 complex subunit mu-1 isoform 2 [Homo sapiens]
Q96RS6	case2-VS-control	1.20818	0.149571	8.07765	7	8.57e-05	0.000683771	Up	Q96RS6	NudC domain-containing protein 1 OS=Homo sapiens OX=9606 GN=NUDCD1 PE=1 SV=2	100	0	NP_116258.2	nudC domain-containing protein 1 isoform 1 [Homo sapiens]
Q9BXB5	case2-VS-control	1.79088	0.222138	8.06203	7	8.68e-05	0.000691097	Up	Q9BXB5	Oxysterol-binding protein-related protein 10 OS=Homo sapiens OX=9606 GN=OSBPL10 PE=1 SV=2	100	0	NP_060254.2	oxysterol-binding protein-related protein 10 isoform 1 [Homo sapiens]
Q99714	case2-VS-control	-1.13513	0.156294	-7.26282	8	8.7e-05	0.000691528	Down	Q99714	3-hydroxyacyl-CoA dehydrogenase type-2 OS=Homo sapiens OX=9606 GN=HSD17B10 PE=1 SV=3	100	0	NP_004484.1	3-hydroxyacyl-CoA dehydrogenase type-2 isoform 1 [Homo sapiens]
O75414	case2-VS-control	0.72481	0.0999982	7.24823	8	8.82e-05	0.000700199	None	O75414	Nucleoside diphosphate kinase 6 OS=Homo sapiens OX=9606 GN=NME6 PE=1 SV=3	100	4e-137	NP_005784.1	nucleoside diphosphate kinase 6 isoform 1 [Homo sapiens]
P78347	case2-VS-control	-1.17375	0.162131	-7.23953	8	8.9e-05	0.000704209	Down	P78347	General transcription factor II-I OS=Homo sapiens OX=9606 GN=GTF2I PE=1 SV=2	100	0	NP_127492.1	general transcription factor II-I isoform 1 [Homo sapiens]
P29558	case2-VS-control	-2.0635	0.28506	-7.23883	8	8.9e-05	0.000704209	Down	P29558	RNA-binding motif, single-stranded-interacting protein 1 OS=Homo sapiens OX=9606 GN=RBMS1 PE=1 SV=3	100	0	NP_058520.1	RNA-binding motif, single-stranded-interacting protein 1 isoform a [Homo sapiens]
O60828	case2-VS-control	1.99555	0.275945	7.23168	8	8.96e-05	0.000707267	Up	O60828	Polyglutamine-binding protein 1 OS=Homo sapiens OX=9606 GN=PQBP1 PE=1 SV=1	100	0	EAW50736.1	polyglutamine binding protein 1, isoform CRA_b [Homo sapiens]
Q9UKV8	case2-VS-control	1.34231	0.185635	7.23088	8	8.97e-05	0.000707267	Up	Q9UKV8	Protein argonaute-2 OS=Homo sapiens OX=9606 GN=AGO2 PE=1 SV=3	100	0	NP_036286.2	protein argonaute-2 isoform 1 [Homo sapiens]
Q09472	case2-VS-control	-1.34645	0.186287	-7.22779	8	9e-05	0.00070764	Down	Q09472	Histone acetyltransferase p300 OS=Homo sapiens OX=9606 GN=EP300 PE=1 SV=2	100	0	NP_001420.2	histone acetyltransferase p300 [Homo sapiens]
Q9H5Q4	case2-VS-control	0.522041	0.0722364	7.22684	8	9.01e-05	0.00070764	None	Q9H5Q4	Dimethyladenosine transferase 2, mitochondrial OS=Homo sapiens OX=9606 GN=TFB2M PE=1 SV=1	100	0	NP_071761.1	dimethyladenosine transferase 2, mitochondrial [Homo sapiens]
Q9Y5Z0	case2-VS-control	2.20448	0.138739	15.8894	4	9.17e-05	0.000719244	Up	Q9Y5Z0	Beta-secretase 2 OS=Homo sapiens OX=9606 GN=BACE2 PE=1 SV=1	100	0	NP_036237.2	beta-secretase 2 isoform A preproprotein [Homo sapiens]
P54802	case2-VS-control	1.09187	0.151764	7.1945	8	9.29e-05	0.000727867	Up	P54802	Alpha-N-acetylglucosaminidase OS=Homo sapiens OX=9606 GN=NAGLU PE=1 SV=2	100	0	NP_000254.2	alpha-N-acetylglucosaminidase precursor [Homo sapiens]
Q9UPN9	case2-VS-control	0.602878	0.0841714	7.16251	8	9.59e-05	0.000749758	None	Q9UPN9	E3 ubiquitin-protein ligase TRIM33 OS=Homo sapiens OX=9606 GN=TRIM33 PE=1 SV=3	100	0	NP_056990.3	E3 ubiquitin-protein ligase TRIM33 isoform alpha [Homo sapiens]
P45984	case2-VS-control	0.683768	0.0747587	9.14633	6	9.61e-05	0.000750113	None	P45984	Mitogen-activated protein kinase 9 OS=Homo sapiens OX=9606 GN=MAPK9 PE=1 SV=2	100	0	NP_002743.3	mitogen-activated protein kinase 9 isoform alpha2 [Homo sapiens]
Q5JRX3	case2-VS-control	0.661385	0.0924386	7.15485	8	9.66e-05	0.000752869	None	Q5JRX3	Presequence protease, mitochondrial OS=Homo sapiens OX=9606 GN=PITRM1 PE=1 SV=3	100	0	NP_055704.2	presequence protease, mitochondrial isoform 2 precursor [Homo sapiens]
Q53H12	case2-VS-control	-0.645885	0.0904741	-7.1389	8	9.82e-05	0.000763483	None	Q53H12	Acylglycerol kinase, mitochondrial OS=Homo sapiens OX=9606 GN=AGK PE=1 SV=2	100	0	NP_060708.1	acylglycerol kinase, mitochondrial precursor [Homo sapiens]
Q6UW78	case2-VS-control	-0.760527	0.106577	-7.13596	8	9.84e-05	0.000764409	None	Q6UW78	Ubiquinol-cytochrome-c reductase complex assembly factor 3 OS=Homo sapiens OX=9606 GN=UQCC3 PE=1 SV=2	100	4e-60	NP_001078841.1	ubiquinol-cytochrome-c reductase complex assembly factor 3 [Homo sapiens]
Q14247	case2-VS-control	0.555395	0.0780536	7.11556	8	0.000100439	0.000778609	None	Q14247	Src substrate cortactin OS=Homo sapiens OX=9606 GN=CTTN PE=1 SV=2	100	0	NP_005222.2	src substrate cortactin isoform a [Homo sapiens]
Q9BUE6	case2-VS-control	-0.886559	0.1249	-7.09813	8	0.000102181	0.000790354	None	Q9BUE6	Iron-sulfur cluster assembly 1 homolog, mitochondrial OS=Homo sapiens OX=9606 GN=ISCA1 PE=1 SV=1	100	8e-91	AAG59854.1	GK004 [Homo sapiens]
O60907	case2-VS-control	-0.370722	0.0522395	-7.09658	8	0.000102338	0.000790354	None	O60907	F-box-like/WD repeat-containing protein TBL1X OS=Homo sapiens OX=9606 GN=TBL1X PE=1 SV=3	100	0	NP_005638.1	F-box-like/WD repeat-containing protein TBL1X isoform a [Homo sapiens]
P15311	case2-VS-control	2.49276	0.351389	7.094	8	0.000102599	0.000790354	Up	P15311	Ezrin OS=Homo sapiens OX=9606 GN=EZR PE=1 SV=4	100	0	NP_003370.2	ezrin [Homo sapiens]
Q9BRJ7	case2-VS-control	0.629683	0.0887674	7.09363	8	0.000102637	0.000790354	None	Q9BRJ7	Tudor-interacting repair regulator protein OS=Homo sapiens OX=9606 GN=NUDT16L1 PE=1 SV=1	100	5e-154	XP_001169295.2	PREDICTED: protein syndesmos isoform X2 [Pan troglodytes]
Q9Y2R4	case2-VS-control	0.823245	0.116166	7.08682	8	0.00010333	0.000794369	None	Q9Y2R4	Probable ATP-dependent RNA helicase DDX52 OS=Homo sapiens OX=9606 GN=DDX52 PE=1 SV=3	100	0	Q9Y2R4.3	RecName: Full=Probable ATP-dependent RNA helicase DDX52; AltName: Full=ATP-dependent RNA helicase ROK1-like; AltName: Full=DEAD box protein 52
Q9Y512	case2-VS-control	1.28717	0.182042	7.07071	8	0.000104991	0.000805802	Up	Q9Y512	Sorting and assembly machinery component 50 homolog OS=Homo sapiens OX=9606 GN=SAMM50 PE=1 SV=3	100	0	NP_056195.3	sorting and assembly machinery component 50 homolog [Homo sapiens]
Q14728	case2-VS-control	1.59966	0.226518	7.06197	8	0.000105904	0.000810927	Up	Q14728	Major facilitator superfamily domain-containing protein 10 OS=Homo sapiens OX=9606 GN=MFSD10 PE=1 SV=1	100	0	NP_001111.3	major facilitator superfamily domain-containing protein 10 [Homo sapiens]
Q9Y2T2	case2-VS-control	1.53268	0.217106	7.05958	8	0.000106155	0.000810927	Up	Q9Y2T2	AP-3 complex subunit mu-1 OS=Homo sapiens OX=9606 GN=AP3M1 PE=1 SV=1	100	0	XP_012358393.1	PREDICTED: AP-3 complex subunit mu-1 isoform X1 [Nomascus leucogenys]
Q9NXG6	case2-VS-control	-1.35713	0.192247	-7.05931	8	0.000106184	0.000810927	Down	Q9NXG6	Transmembrane prolyl 4-hydroxylase OS=Homo sapiens OX=9606 GN=P4HTM PE=1 SV=2	100	0	NP_808808.1	transmembrane prolyl 4-hydroxylase isoform a [Homo sapiens]
P20338	case2-VS-control	0.649983	0.092327	7.04001	8	0.000108239	0.000825227	None	P20338	Ras-related protein Rab-4A OS=Homo sapiens OX=9606 GN=RAB4A PE=1 SV=3	100	1e-162	NP_004569.2	ras-related protein Rab-4A isoform 1 [Homo sapiens]
O43747	case2-VS-control	0.611697	0.0869115	7.03816	8	0.000108437	0.000825227	None	O43747	AP-1 complex subunit gamma-1 OS=Homo sapiens OX=9606 GN=AP1G1 PE=1 SV=5	100	0	EHH31820.1	Adapter-related protein complex 1 subunit gamma-1 [Macaca mulatta]
P13667	case2-VS-control	-0.761107	0.108169	-7.0363	8	0.000108639	0.000825227	None	P13667	Protein disulfide-isomerase A4 OS=Homo sapiens OX=9606 GN=PDIA4 PE=1 SV=2	100	0	NP_004902.1	protein disulfide-isomerase A4 precursor [Homo sapiens]
O95861	case2-VS-control	2.4657	0.350487	7.03508	8	0.00010877	0.000825227	Up	O95861	3'(2'),5'-bisphosphate nucleotidase 1 OS=Homo sapiens OX=9606 GN=BPNT1 PE=1 SV=1	100	0	NP_006076.4	3'(2'),5'-bisphosphate nucleotidase 1 isoform 1 [Homo sapiens]
Q8NE86	case2-VS-control	1.04547	0.148755	7.0281	8	0.000109528	0.000828542	Up	Q8NE86	Calcium uniporter protein, mitochondrial OS=Homo sapiens OX=9606 GN=MCU PE=1 SV=1	100	0	NP_612366.1	calcium uniporter protein, mitochondrial isoform 1 precursor [Homo sapiens]
O14979	case2-VS-control	0.560718	0.0797862	7.02776	8	0.000109565	0.000828542	None	O14979	Heterogeneous nuclear ribonucleoprotein D-like OS=Homo sapiens OX=9606 GN=HNRNPDL PE=1 SV=3	100	0	NP_112740.1	heterogeneous nuclear ribonucleoprotein D-like isoform a [Homo sapiens]
Q9NSI2	case2-VS-control	0.675563	0.0963665	7.01035	8	0.000111482	0.00084166	None	Q9NSI2	Protein FAM207A OS=Homo sapiens OX=9606 GN=FAM207A PE=1 SV=2	100	6e-161	NP_478070.1	protein FAM207A isoform 1 [Homo sapiens]
P00533	case2-VS-control	-0.522187	0.0746067	-6.9992	8	0.000112729	0.000849691	None	P00533	Epidermal growth factor receptor OS=Homo sapiens OX=9606 GN=EGFR PE=1 SV=2	100	0	NP_005219.2	epidermal growth factor receptor isoform a precursor [Homo sapiens]
A1L390	case2-VS-control	2.62336	0.24225	10.8291	5	0.000116533	0.000876938	Up	A1L390	Pleckstrin homology domain-containing family G member 3 OS=Homo sapiens OX=9606 GN=PLEKHG3 PE=1 SV=1	100	0	NP_001295076.1	pleckstrin homology domain-containing family G member 3 [Homo sapiens]
P61964	case2-VS-control	-0.854049	0.122723	-6.95919	8	0.000117332	0.000881516	None	P61964	WD repeat-containing protein 5 OS=Homo sapiens OX=9606 GN=WDR5 PE=1 SV=1	100	0	NP_060058.1	WD repeat-containing protein 5 [Homo sapiens]
Q8TCJ2	case2-VS-control	0.656142	0.0943338	6.95553	8	0.000117764	0.000882059	None	Q8TCJ2	Dolichyl-diphosphooligosaccharide--protein glycosyltransferase subunit STT3B OS=Homo sapiens OX=9606 GN=STT3B PE=1 SV=1	100	0	NP_849193.1	dolichyl-diphosphooligosaccharide--protein glycosyltransferase subunit STT3B [Homo sapiens]
Q6UB35	case2-VS-control	0.415123	0.0596841	6.95534	8	0.000117786	0.000882059	None	Q6UB35	Monofunctional C1-tetrahydrofolate synthase, mitochondrial OS=Homo sapiens OX=9606 GN=MTHFD1L PE=1 SV=1	100	0	NP_056255.2	monofunctional C1-tetrahydrofolate synthase, mitochondrial isoform 2 precursor [Homo sapiens]
Q9BYB4	case2-VS-control	1.89333	0.272886	6.93815	8	0.000119836	0.000895964	Up	Q9BYB4	Guanine nucleotide-binding protein subunit beta-like protein 1 OS=Homo sapiens OX=9606 GN=GNB1L PE=1 SV=2	100	0	NP_443730.1	guanine nucleotide-binding protein subunit beta-like protein 1 [Homo sapiens]
O14925	case2-VS-control	0.898817	0.129657	6.93226	8	0.000120548	0.000899831	None	O14925	Mitochondrial import inner membrane translocase subunit Tim23 OS=Homo sapiens OX=9606 GN=TIMM23 PE=1 SV=1	100	1e-149	NP_006318.1	mitochondrial import inner membrane translocase subunit Tim23 [Homo sapiens]
Q12959	case2-VS-control	-0.690678	0.0997964	-6.92088	8	0.000121936	0.000908583	None	Q12959	Disks large homolog 1 OS=Homo sapiens OX=9606 GN=DLG1 PE=1 SV=2	100	0	NP_001091894.1	disks large homolog 1 isoform 1 [Homo sapiens]
P47985	case2-VS-control	0.86049	0.124358	6.91944	8	0.000122113	0.000908583	None	P47985	Cytochrome b-c1 complex subunit Rieske, mitochondrial OS=Homo sapiens OX=9606 GN=UQCRFS1 PE=1 SV=2	100	0	NP_005994.2	cytochrome b-c1 complex subunit Rieske, mitochondrial [Homo sapiens]
P36551	case2-VS-control	0.664163	0.0961288	6.90909	8	0.000123392	0.000916629	None	P36551	Oxygen-dependent coproporphyrinogen-III oxidase, mitochondrial OS=Homo sapiens OX=9606 GN=CPOX PE=1 SV=3	100	0	NP_000088.3	oxygen-dependent coproporphyrinogen-III oxidase, mitochondrial precursor [Homo sapiens]
Q9HD42	case2-VS-control	-1.75924	0.254759	-6.90551	8	0.000123838	0.000918467	Down	Q9HD42	Charged multivesicular body protein 1a OS=Homo sapiens OX=9606 GN=CHMP1A PE=1 SV=1	100	4e-139	NP_002759.2	charged multivesicular body protein 1a isoform 2 [Homo sapiens]
Q13561	case2-VS-control	-0.539731	0.0781874	-6.90305	8	0.000124146	0.000919277	None	Q13561	Dynactin subunit 2 OS=Homo sapiens OX=9606 GN=DCTN2 PE=1 SV=4	100	0	NP_001248342.1	dynactin subunit 2 isoform 3 [Homo sapiens]
P07711	case2-VS-control	-2.11673	0.242436	-8.73111	6	0.000124863	0.000923109	Down	P07711	Cathepsin L1 OS=Homo sapiens OX=9606 GN=CTSL PE=1 SV=2	100	0	NP_001903.1	cathepsin L1 isoform 1 preproprotein [Homo sapiens]
P08243	case2-VS-control	4.08808	0.594255	6.87934	8	0.000127154	0.000938066	Up	P08243	Asparagine synthetase [glutamine-hydrolyzing] OS=Homo sapiens OX=9606 GN=ASNS PE=1 SV=4	100	0	NP_597680.2	asparagine synthetase [glutamine-hydrolyzing] isoform a [Homo sapiens]
Q8WVV9	case2-VS-control	0.921706	0.134003	6.87827	8	0.000127292	0.000938066	None	Q8WVV9	Heterogeneous nuclear ribonucleoprotein L-like OS=Homo sapiens OX=9606 GN=HNRNPLL PE=1 SV=1	100	0	NP_612403.2	heterogeneous nuclear ribonucleoprotein L-like isoform 1 [Homo sapiens]
Q13596	case2-VS-control	0.590575	0.0861009	6.8591	8	0.000129786	0.000954928	None	Q13596	Sorting nexin-1 OS=Homo sapiens OX=9606 GN=SNX1 PE=1 SV=3	100	0	NP_003090.2	sorting nexin-1 isoform a [Homo sapiens]
Q9Y679	case2-VS-control	0.722238	0.105359	6.85503	8	0.000130323	0.00095642	None	Q9Y679	Ancient ubiquitous protein 1 OS=Homo sapiens OX=9606 GN=AUP1 PE=1 SV=2	100	0	NP_853553.1	ancient ubiquitous protein 1 [Homo sapiens]
Q9UMS4	case2-VS-control	-0.409652	0.0597646	-6.85443	8	0.000130402	0.00095642	None	Q9UMS4	Pre-mRNA-processing factor 19 OS=Homo sapiens OX=9606 GN=PRPF19 PE=1 SV=1	100	0	NP_055317.1	pre-mRNA-processing factor 19 [Homo sapiens]
Q8N335	case2-VS-control	-1.53241	0.223805	-6.84704	8	0.000131383	0.000959356	Down	Q8N335	Glycerol-3-phosphate dehydrogenase 1-like protein OS=Homo sapiens OX=9606 GN=GPD1L PE=1 SV=1	100	0	NP_055956.1	glycerol-3-phosphate dehydrogenase 1-like protein [Homo sapiens]
O75909	case2-VS-control	-0.690318	0.100826	-6.84665	8	0.000131435	0.000959356	None	O75909	Cyclin-K OS=Homo sapiens OX=9606 GN=CCNK PE=1 SV=2	100	0	NP_001092872.1	cyclin-K [Homo sapiens]
Q13155	case2-VS-control	0.88087	0.128663	6.84631	8	0.000131481	0.000959356	None	Q13155	Aminoacyl tRNA synthase complex-interacting multifunctional protein 2 OS=Homo sapiens OX=9606 GN=AIMP2 PE=1 SV=2	100	0	NP_006294.2	aminoacyl tRNA synthase complex-interacting multifunctional protein 2 isoform a [Homo sapiens]
Q9BQS8	case2-VS-control	-1.1205	0.106119	-10.5589	5	0.000131632	0.000959356	Down	Q9BQS8	FYVE and coiled-coil domain-containing protein 1 OS=Homo sapiens OX=9606 GN=FYCO1 PE=1 SV=3	100	0	NP_078789.2	FYVE and coiled-coil domain-containing protein 1 [Homo sapiens]
P82650	case2-VS-control	-0.792394	0.115804	-6.84257	8	0.000131981	0.00096039	None	P82650	28S ribosomal protein S22, mitochondrial OS=Homo sapiens OX=9606 GN=MRPS22 PE=1 SV=1	100	0	NP_064576.1	28S ribosomal protein S22, mitochondrial [Homo sapiens]
Q5VT66	case2-VS-control	1.95959	0.286752	6.83375	8	0.000133168	0.000967504	Up	Q5VT66	Mitochondrial amidoxime-reducing component 1 OS=Homo sapiens OX=9606 GN=MARC1 PE=1 SV=1	100	0	NP_073583.3	mitochondrial amidoxime-reducing component 1 precursor [Homo sapiens]
O15427	case2-VS-control	-0.487063	0.0712923	-6.83191	8	0.000133418	0.000967802	None	O15427	Monocarboxylate transporter 4 OS=Homo sapiens OX=9606 GN=SLC16A3 PE=1 SV=1	100	0	NP_004198.1	monocarboxylate transporter 4 [Homo sapiens]
Q9BWN1	case2-VS-control	-1.03087	0.119527	-8.62452	6	0.000133773	0.000968587	Down	Q9BWN1	Proline-rich protein 14 OS=Homo sapiens OX=9606 GN=PRR14 PE=1 SV=1	100	0	NP_076936.1	proline-rich protein 14 [Homo sapiens]
O60513	case2-VS-control	1.16807	0.0460003	25.3927	3	0.000133945	0.000968587	Up	O60513	Beta-1,4-galactosyltransferase 4 OS=Homo sapiens OX=9606 GN=B4GALT4 PE=1 SV=1	100	0	NP_003769.1	beta-1,4-galactosyltransferase 4 [Homo sapiens]
Q06136	case2-VS-control	-2.19311	0.321373	-6.82421	8	0.000134467	0.000970653	Down	Q06136	3-ketodihydrosphingosine reductase OS=Homo sapiens OX=9606 GN=KDSR PE=1 SV=1	100	0	NP_002026.1	3-ketodihydrosphingosine reductase precursor [Homo sapiens]
P54803	case2-VS-control	4.43419	0.0514589	86.1695	2	0.00013465	0.000970653	Up	P54803	Galactocerebrosidase OS=Homo sapiens OX=9606 GN=GALC PE=1 SV=3	100	0	NP_000144.2	galactocerebrosidase isoform a precursor [Homo sapiens]
P04062	case2-VS-control	0.913717	0.133963	6.82066	8	0.000134952	0.000971319	None	P04062	Glucosylceramidase OS=Homo sapiens OX=9606 GN=GBA PE=1 SV=3	100	0	NP_000148.2	glucosylceramidase isoform 1 precursor [Homo sapiens]
Q5U5X0	case2-VS-control	-1.23346	0.181041	-6.81313	8	0.000135991	0.00097728	Down	Q5U5X0	Complex III assembly factor LYRM7 OS=Homo sapiens OX=9606 GN=LYRM7 PE=1 SV=1	100	4e-71	NP_859056.2	complex III assembly factor LYRM7 isoform 1 [Homo sapiens]
Q9Y376	case2-VS-control	1.16201	0.170626	6.81026	8	0.000136389	0.000978558	Up	Q9Y376	Calcium-binding protein 39 OS=Homo sapiens OX=9606 GN=CAB39 PE=1 SV=1	100	0	NP_057373.1	calcium-binding protein 39 [Homo sapiens]
Q9NRL3	case2-VS-control	1.41893	0.208396	6.8088	8	0.000136592	0.000978558	Up	Q9NRL3	Striatin-4 OS=Homo sapiens OX=9606 GN=STRN4 PE=1 SV=2	100	0	NP_037535.2	striatin-4 isoform 1 [Homo sapiens]
Q6PCB5	case2-VS-control	-1.01485	0.149135	-6.80488	8	0.000137139	0.000980955	Down	Q6PCB5	Round spermatid basic protein 1-like protein OS=Homo sapiens OX=9606 GN=RSBN1L PE=1 SV=2	100	0	NP_940869.2	round spermatid basic protein 1-like protein [Homo sapiens]
O75475	case2-VS-control	-2.87075	0.3831	-7.49349	7	0.000138058	0.000986009	Down	O75475	PC4 and SFRS1-interacting protein OS=Homo sapiens OX=9606 GN=PSIP1 PE=1 SV=1	100	0	NP_150091.2	PC4 and SFRS1-interacting protein isoform 2 [Homo sapiens]
P61619	case2-VS-control	0.499898	0.073594	6.79265	8	0.00013886	0.000990209	None	P61619	Protein transport protein Sec61 subunit alpha isoform 1 OS=Homo sapiens OX=9606 GN=SEC61A1 PE=1 SV=2	99.37	0	ERE66773.1	protein transport protein Sec61 subunit alpha isoform 1-like protein [Cricetulus griseus]
O43488	case2-VS-control	-0.698037	0.10286	-6.78631	8	0.000139763	0.000995111	None	O43488	Aflatoxin B1 aldehyde reductase member 2 OS=Homo sapiens OX=9606 GN=AKR7A2 PE=1 SV=3	100	0	NP_003680.2	aflatoxin B1 aldehyde reductase member 2 isoform 1 [Homo sapiens]
O75554	case2-VS-control	0.750497	0.11084	6.77101	8	0.000141965	0.00100804	None	O75554	WW domain-binding protein 4 OS=Homo sapiens OX=9606 GN=WBP4 PE=1 SV=1	100	0	NP_009118.1	WW domain-binding protein 4 [Homo sapiens]
P07099	case2-VS-control	-0.781034	0.115355	-6.77068	8	0.000142014	0.00100804	None	P07099	Epoxide hydrolase 1 OS=Homo sapiens OX=9606 GN=EPHX1 PE=1 SV=1	100	0	NP_000111.1	epoxide hydrolase 1 [Homo sapiens]
P26599	case2-VS-control	0.755801	0.11168	6.76754	8	0.00014247	0.00100973	None	P26599	Polypyrimidine tract-binding protein 1 OS=Homo sapiens OX=9606 GN=PTBP1 PE=1 SV=1	100	0	NP_114368.1	polypyrimidine tract-binding protein 1 isoform c [Homo sapiens]
Q709C8	case2-VS-control	0.922103	0.136489	6.75586	8	0.000144185	0.00101935	None	Q709C8	Vacuolar protein sorting-associated protein 13C OS=Homo sapiens OX=9606 GN=VPS13C PE=1 SV=1	100	0	NP_065872.1	vacuolar protein sorting-associated protein 13C isoform 2A [Homo sapiens]
Q9Y5K8	case2-VS-control	0.836285	0.123797	6.7553	8	0.000144268	0.00101935	None	Q9Y5K8	V-type proton ATPase subunit D OS=Homo sapiens OX=9606 GN=ATP6V1D PE=1 SV=1	100	6e-177	NP_057078.1	V-type proton ATPase subunit D [Homo sapiens]
Q8NI60	case2-VS-control	-1.24985	0.185193	-6.7489	8	0.000145217	0.00102449	Down	Q8NI60	Atypical kinase COQ8A, mitochondrial OS=Homo sapiens OX=9606 GN=COQ8A PE=1 SV=1	100	0	NP_064632.2	atypical kinase COQ8A, mitochondrial [Homo sapiens]
Q8NBI6	case2-VS-control	-2.10637	0.247952	-8.49507	6	0.000145601	0.00102563	Down	Q8NBI6	Xyloside xylosyltransferase 1 OS=Homo sapiens OX=9606 GN=XXYLT1 PE=1 SV=1	100	0	NP_689744.3	xyloside xylosyltransferase 1 isoform 1 [Homo sapiens]
Q14534	case2-VS-control	-1.34804	0.199906	-6.74339	8	0.00014604	0.00102717	Down	Q14534	Squalene monooxygenase OS=Homo sapiens OX=9606 GN=SQLE PE=1 SV=3	100	0	NP_003120.2	squalene monooxygenase [Homo sapiens]
P52272	case2-VS-control	0.784669	0.116413	6.74038	8	0.000146493	0.00102879	None	P52272	Heterogeneous nuclear ribonucleoprotein M OS=Homo sapiens OX=9606 GN=HNRNPM PE=1 SV=3	100	0	NP_005959.2	heterogeneous nuclear ribonucleoprotein M isoform a [Homo sapiens]
Q9BWM7	case2-VS-control	0.694726	0.103131	6.73634	8	0.000147101	0.00103149	None	Q9BWM7	Sideroflexin-3 OS=Homo sapiens OX=9606 GN=SFXN3 PE=1 SV=3	100	0	NP_112233.2	sideroflexin-3 [Homo sapiens]
Q9UFN0	case2-VS-control	-0.938578	0.139521	-6.72714	8	0.000148498	0.00103971	None	Q9UFN0	Protein NipSnap homolog 3A OS=Homo sapiens OX=9606 GN=NIPSNAP3A PE=1 SV=2	100	0	NP_056284.1	protein NipSnap homolog 3A isoform 1 [Homo sapiens]
Q96DI7	case2-VS-control	0.806918	0.120097	6.71886	8	0.000149768	0.00104702	None	Q96DI7	U5 small nuclear ribonucleoprotein 40 kDa protein OS=Homo sapiens OX=9606 GN=SNRNP40 PE=1 SV=1	100	0	NP_004805.2	U5 small nuclear ribonucleoprotein 40 kDa protein [Homo sapiens]
O95571	case2-VS-control	1.13027	0.168354	6.71366	8	0.000150571	0.00105105	Up	O95571	Persulfide dioxygenase ETHE1, mitochondrial OS=Homo sapiens OX=9606 GN=ETHE1 PE=1 SV=2	100	0	NP_055112.2	persulfide dioxygenase ETHE1, mitochondrial isoform 1 [Homo sapiens]
Q8WUD1	case2-VS-control	-1.20075	0.178936	-6.71048	8	0.000151066	0.00105291	Down	Q8WUD1	Ras-related protein Rab-2B OS=Homo sapiens OX=9606 GN=RAB2B PE=1 SV=1	100	2e-161	NP_116235.2	ras-related protein Rab-2B isoform 1 [Homo sapiens]
P14550	case2-VS-control	1.67414	0.250353	6.68711	8	0.000154751	0.00107698	Up	P14550	Alcohol dehydrogenase [NADP(+)] OS=Homo sapiens OX=9606 GN=AKR1A1 PE=1 SV=3	100	0	NP_006057.1	alcohol dehydrogenase [NADP(+)] [Homo sapiens]
Q4KMQ2	case2-VS-control	-1.0563	0.15804	-6.68372	8	0.000155294	0.0010785	Down	Q4KMQ2	Anoctamin-6 OS=Homo sapiens OX=9606 GN=ANO6 PE=1 SV=2	100	0	NP_001020527.2	anoctamin-6 isoform a [Homo sapiens]
Q9NRP2	case2-VS-control	-1.60384	0.157237	-10.2002	5	0.000155437	0.0010785	Down	Q9NRP2	COX assembly mitochondrial protein 2 homolog OS=Homo sapiens OX=9606 GN=CMC2 PE=1 SV=1	100	1e-51	NP_001338902.1	COX assembly mitochondrial protein 2 homolog isoform 2 [Homo sapiens]
Q5VT52	case2-VS-control	-0.590884	0.0884856	-6.67775	8	0.000156254	0.00108255	None	Q5VT52	Regulation of nuclear pre-mRNA domain-containing protein 2 OS=Homo sapiens OX=9606 GN=RPRD2 PE=1 SV=1	100	0	NP_056018.2	regulation of nuclear pre-mRNA domain-containing protein 2 isoform 1 [Homo sapiens]
O60437	case2-VS-control	2.79313	0.380572	7.33928	7	0.000157368	0.00108864	Up	O60437	Periplakin OS=Homo sapiens OX=9606 GN=PPL PE=1 SV=4	100	0	O60437.4	RecName: Full=Periplakin; AltName: Full=190 kDa paraneoplastic pemphigus antigen; AltName: Full=195 kDa cornified envelope precursor protein
Q9HCS7	case2-VS-control	-0.504163	0.0756396	-6.66533	8	0.000158275	0.00109328	None	Q9HCS7	Pre-mRNA-splicing factor SYF1 OS=Homo sapiens OX=9606 GN=XAB2 PE=1 SV=2	100	0	NP_064581.2	pre-mRNA-splicing factor SYF1 [Homo sapiens]
P30825	case2-VS-control	0.720019	0.108115	6.65976	8	0.00015919	0.00109785	None	P30825	High affinity cationic amino acid transporter 1 OS=Homo sapiens OX=9606 GN=SLC7A1 PE=1 SV=1	100	0	NP_003036.1	high affinity cationic amino acid transporter 1 [Homo sapiens]
Q86SE9	case2-VS-control	-1.65556	0.226067	-7.32331	7	0.000159537	0.00109785	Down	Q86SE9	Polycomb group RING finger protein 5 OS=Homo sapiens OX=9606 GN=PCGF5 PE=1 SV=1	100	0	NP_115749.2	polycomb group RING finger protein 5 [Homo sapiens]
O60503	case2-VS-control	-2.24982	0.307248	-7.32249	7	0.000159649	0.00109785	Down	O60503	Adenylate cyclase type 9 OS=Homo sapiens OX=9606 GN=ADCY9 PE=1 SV=4	100	0	NP_001107.2	adenylate cyclase type 9 [Homo sapiens]
Q99650	case2-VS-control	-2.06904	0.247787	-8.3501	6	0.000160305	0.00110073	Down	Q99650	Oncostatin-M-specific receptor subunit beta OS=Homo sapiens OX=9606 GN=OSMR PE=1 SV=1	100	0	NP_003990.1	oncostatin-M-specific receptor subunit beta isoform 1 precursor [Homo sapiens]
Q01082	case2-VS-control	-1.4642	0.220136	-6.65135	8	0.000160582	0.001101	Down	Q01082	Spectrin beta chain, non-erythrocytic 1 OS=Homo sapiens OX=9606 GN=SPTBN1 PE=1 SV=2	100	0	NP_003119.2	spectrin beta chain, non-erythrocytic 1 isoform 1 [Homo sapiens]
Q8NEM2	case2-VS-control	2.49729	0.299384	8.34142	6	0.000161238	0.00110386	Up	Q8NEM2	SHC SH2 domain-binding protein 1 OS=Homo sapiens OX=9606 GN=SHCBP1 PE=1 SV=3	100	0	Q8NEM2.3	RecName: Full=SHC SH2 domain-binding protein 1
P23497	case2-VS-control	-1.03723	0.156292	-6.63648	8	0.000163079	0.00111482	Down	P23497	Nuclear autoantigen Sp-100 OS=Homo sapiens OX=9606 GN=SP100 PE=1 SV=3	100	0	NP_003104.2	nuclear autoantigen Sp-100 isoform 2 [Homo sapiens]
O43847	case2-VS-control	1.69876	0.232911	7.29361	7	0.000163658	0.00111712	Up	O43847	Nardilysin OS=Homo sapiens OX=9606 GN=NRDC PE=1 SV=3	100	0	NP_001095132.1	nardilysin isoform b precursor [Homo sapiens]
Q9H3U5	case2-VS-control	-1.27968	0.193064	-6.62827	8	0.000164476	0.00112105	Down	Q9H3U5	Major facilitator superfamily domain-containing protein 1 OS=Homo sapiens OX=9606 GN=MFSD1 PE=2 SV=2	100	0	NP_073573.2	major facilitator superfamily domain-containing protein 1 isoform 1 [Homo sapiens]
Q8WZ82	case2-VS-control	1.3518	0.204078	6.62391	8	0.000165222	0.00112328	Up	Q8WZ82	Esterase OVCA2 OS=Homo sapiens OX=9606 GN=OVCA2 PE=1 SV=1	100	2e-160	NP_543012.1	esterase OVCA2 [Homo sapiens]
Q9H2K8	case2-VS-control	3.63547	0.548872	6.62353	8	0.000165288	0.00112328	Up	Q9H2K8	Serine/threonine-protein kinase TAO3 OS=Homo sapiens OX=9606 GN=TAOK3 PE=1 SV=2	100	0	NP_057365.3	serine/threonine-protein kinase TAO3 isoform b [Homo sapiens]
O15118	case2-VS-control	1.08302	0.163634	6.61856	8	0.000166145	0.00112744	Up	O15118	NPC intracellular cholesterol transporter 1 OS=Homo sapiens OX=9606 GN=NPC1 PE=1 SV=2	100	0	NP_000262.2	Niemann-Pick C1 protein precursor [Homo sapiens]
P53367	case2-VS-control	1.70827	0.258721	6.60277	8	0.000168897	0.00114445	Up	P53367	Arfaptin-1 OS=Homo sapiens OX=9606 GN=ARFIP1 PE=1 SV=2	100	0	NP_001020766.1	arfaptin-1 isoform 1 [Homo sapiens]
P50402	case2-VS-control	-0.867291	0.131399	-6.60041	8	0.000169314	0.00114468	None	P50402	Emerin OS=Homo sapiens OX=9606 GN=EMD PE=1 SV=1	100	0	NP_000108.1	emerin [Homo sapiens]
Q5VW32	case2-VS-control	1.74472	0.26436	6.59977	8	0.000169427	0.00114468	Up	Q5VW32	BRO1 domain-containing protein BROX OS=Homo sapiens OX=9606 GN=BROX PE=1 SV=1	100	0	XP_006711236.1	PREDICTED: BRO1 domain-containing protein BROX isoform X3 [Homo sapiens]
Q13033	case2-VS-control	0.545413	0.082688	6.59604	8	0.000170088	0.00114732	None	Q13033	Striatin-3 OS=Homo sapiens OX=9606 GN=STRN3 PE=1 SV=3	100	0	NP_001077362.1	striatin-3 isoform 1 [Homo sapiens]
Q5JRA6	case2-VS-control	0.910389	0.138047	6.59477	8	0.000170313	0.00114732	None	Q5JRA6	Transport and Golgi organization protein 1 homolog OS=Homo sapiens OX=9606 GN=MIA3 PE=1 SV=1	100	0	NP_940953.2	transport and Golgi organization protein 1 homolog isoform 1 precursor [Homo sapiens]
Q9BY77	case2-VS-control	-0.644093	0.0977013	-6.59248	8	0.00017072	0.00114839	None	Q9BY77	Polymerase delta-interacting protein 3 OS=Homo sapiens OX=9606 GN=POLDIP3 PE=1 SV=2	100	0	NP_115687.2	polymerase delta-interacting protein 3 isoform 1 [Homo sapiens]
P53041	case2-VS-control	2.60474	0.39579	6.5811	8	0.00017276	0.00116043	Up	P53041	Serine/threonine-protein phosphatase 5 OS=Homo sapiens OX=9606 GN=PPP5C PE=1 SV=1	100	0	NP_006238.1	serine/threonine-protein phosphatase 5 isoform 1 [Homo sapiens]
P45954	case2-VS-control	1.49893	0.228228	6.56767	8	0.000175204	0.00117374	Up	P45954	Short/branched chain specific acyl-CoA dehydrogenase, mitochondrial OS=Homo sapiens OX=9606 GN=ACADSB PE=1 SV=1	100	0	NP_001600.1	short/branched chain specific acyl-CoA dehydrogenase, mitochondrial isoform 1 precursor [Homo sapiens]
P54132	case2-VS-control	-1.82097	0.252454	-7.21308	7	0.000175451	0.00117374	Down	P54132	Bloom syndrome protein OS=Homo sapiens OX=9606 GN=BLM PE=1 SV=1	100	0	NP_000048.1	Bloom syndrome protein isoform 1 [Homo sapiens]
O94766	case2-VS-control	-1.85362	0.225622	-8.21557	6	0.000175503	0.00117374	Down	O94766	Galactosylgalactosylxylosylprotein 3-beta-glucuronosyltransferase 3 OS=Homo sapiens OX=9606 GN=B3GAT3 PE=1 SV=2	100	0	NP_036332.2	galactosylgalactosylxylosylprotein 3-beta-glucuronosyltransferase 3 isoform 1 [Homo sapiens]
P11117	case2-VS-control	0.470002	0.0717559	6.55001	8	0.000178472	0.00119188	None	P11117	Lysosomal acid phosphatase OS=Homo sapiens OX=9606 GN=ACP2 PE=1 SV=3	100	0	NP_001601.1	lysosomal acid phosphatase isoform 1 precursor [Homo sapiens]
Q12906	case2-VS-control	0.580767	0.0886893	6.54833	8	0.000178788	0.00119226	None	Q12906	Interleukin enhancer-binding factor 3 OS=Homo sapiens OX=9606 GN=ILF3 PE=1 SV=3	100	0	NP_036350.2	interleukin enhancer-binding factor 3 isoform a [Homo sapiens]
P27144	case2-VS-control	-0.694247	0.106051	-6.54636	8	0.000179158	0.00119301	None	P27144	Adenylate kinase 4, mitochondrial OS=Homo sapiens OX=9606 GN=AK4 PE=1 SV=1	100	2e-166	NP_037542.1	adenylate kinase 4, mitochondrial isoform a [Homo sapiens]
Q8TEQ8	case2-VS-control	1.77181	0.271137	6.53476	8	0.00018135	0.00120587	Up	Q8TEQ8	GPI ethanolamine phosphate transferase 3 OS=Homo sapiens OX=9606 GN=PIGO PE=1 SV=3	100	0	NP_116023.2	GPI ethanolamine phosphate transferase 3 isoform 1 [Homo sapiens]
P35222	case2-VS-control	-1.13676	0.174544	-6.51277	8	0.000185591	0.00123172	Down	P35222	Catenin beta-1 OS=Homo sapiens OX=9606 GN=CTNNB1 PE=1 SV=1	99.872	0	XP_003477049.1	PREDICTED: catenin beta-1 [Cavia porcellus]
P60468	case2-VS-control	0.567151	0.0870951	6.51186	8	0.000185769	0.00123172	None	P60468	Protein transport protein Sec61 subunit beta OS=Homo sapiens OX=9606 GN=SEC61B PE=1 SV=2	100	8e-63	NP_006799.1	protein transport protein Sec61 subunit beta [Homo sapiens]
P62750	case2-VS-control	0.837845	0.128975	6.4962	8	0.000188858	0.00125041	None	P62750	60S ribosomal protein L23a OS=Homo sapiens OX=9606 GN=RPL23A PE=1 SV=1	100	7e-106	XP_005693322.1	PREDICTED: 60S ribosomal protein L23a [Capra hircus]
Q9Y666	case2-VS-control	0.638924	0.0985097	6.4859	8	0.000190922	0.00126227	None	Q9Y666	Solute carrier family 12 member 7 OS=Homo sapiens OX=9606 GN=SLC12A7 PE=1 SV=3	100	0	NP_006589.2	solute carrier family 12 member 7 [Homo sapiens]
P03886	case2-VS-control	0.890584	0.1376	6.47226	8	0.000193692	0.00127876	None	P03886	NADH-ubiquinone oxidoreductase chain 1 OS=Homo sapiens OX=9606 GN=MT-ND1 PE=1 SV=1	100	0	YP_003024026.1	NADH dehydrogenase subunit 1 (mitochondrion) [Homo sapiens]
A0PJW6	case2-VS-control	0.751218	0.11619	6.46541	8	0.000195101	0.00128622	None	A0PJW6	Transmembrane protein 223 OS=Homo sapiens OX=9606 GN=TMEM223 PE=1 SV=1	100	7e-144	AAH20914.1	TMEM223 protein, partial [Homo sapiens]
Q9H2D1	case2-VS-control	1.27628	0.197539	6.4609	8	0.000196035	0.00129039	Up	Q9H2D1	Mitochondrial folate transporter/carrier OS=Homo sapiens OX=9606 GN=SLC25A32 PE=1 SV=2	100	0	NP_110407.2	mitochondrial folate transporter/carrier [Homo sapiens]
Q9BSF4	case2-VS-control	1.61724	0.200929	8.04881	6	0.000196708	0.00129039	Up	Q9BSF4	Mitochondrial import inner membrane translocase subunit Tim29 OS=Homo sapiens OX=9606 GN=TIMM29 PE=1 SV=2	100	0	NP_612367.1	mitochondrial import inner membrane translocase subunit Tim29 [Homo sapiens]
Q8WU76	case2-VS-control	1.05313	0.163094	6.4572	8	0.000196804	0.00129039	Up	Q8WU76	Sec1 family domain-containing protein 2 OS=Homo sapiens OX=9606 GN=SCFD2 PE=1 SV=2	100	0	NP_689753.2	sec1 family domain-containing protein 2 [Homo sapiens]
O95232	case2-VS-control	-0.401012	0.0621051	-6.45698	8	0.000196849	0.00129039	None	O95232	Luc7-like protein 3 OS=Homo sapiens OX=9606 GN=LUC7L3 PE=1 SV=2	100	0	NP_057508.2	luc7-like protein 3 isoform 1 [Homo sapiens]
Q8NI37	case2-VS-control	-0.901532	0.139925	-6.44296	8	0.000199796	0.00130786	None	Q8NI37	Protein phosphatase PTC7 homolog OS=Homo sapiens OX=9606 GN=PPTC7 PE=2 SV=1	100	0	NP_644812.1	protein phosphatase PTC7 homolog [Homo sapiens]
P78540	case2-VS-control	3.17269	0.0448891	70.6783	2	0.000200123	0.00130815	Up	P78540	Arginase-2, mitochondrial OS=Homo sapiens OX=9606 GN=ARG2 PE=1 SV=1	100	0	NP_001163.1	arginase-2, mitochondrial precursor [Homo sapiens]
O95070	case2-VS-control	-1.31776	0.204813	-6.43394	8	0.000201718	0.00131671	Down	O95070	Protein YIF1A OS=Homo sapiens OX=9606 GN=YIF1A PE=1 SV=2	100	0	NP_065203.2	protein YIF1A isoform 1 [Homo sapiens]
Q99653	case2-VS-control	-0.406318	0.0631871	-6.4304	8	0.000202479	0.00131982	None	Q99653	Calcineurin B homologous protein 1 OS=Homo sapiens OX=9606 GN=CHP1 PE=1 SV=3	100	6e-140	NP_009167.1	calcineurin B homologous protein 1 [Homo sapiens]
Q8IYB5	case2-VS-control	1.48382	0.231	6.42346	8	0.000203976	0.00132771	Up	Q8IYB5	Stromal membrane-associated protein 1 OS=Homo sapiens OX=9606 GN=SMAP1 PE=1 SV=2	100	0	NP_001037770.1	stromal membrane-associated protein 1 isoform A [Homo sapiens]
Q969P0	case2-VS-control	-1.51654	0.236313	-6.41752	8	0.000205269	0.00133425	Down	Q969P0	Immunoglobulin superfamily member 8 OS=Homo sapiens OX=9606 GN=IGSF8 PE=1 SV=1	100	0	NP_443100.1	immunoglobulin superfamily member 8 precursor [Homo sapiens]
P15559	case2-VS-control	2.53993	0.395973	6.4144	8	0.00020595	0.0013368	Up	P15559	NAD(P)H dehydrogenase [quinone] 1 OS=Homo sapiens OX=9606 GN=NQO1 PE=1 SV=1	100	0	NP_000894.1	NAD(P)H dehydrogenase [quinone] 1 isoform a [Homo sapiens]
P42167	case2-VS-control	1.33603	0.208427	6.41005	8	0.000206905	0.00134112	Up	P42167	Lamina-associated polypeptide 2, isoforms beta/gamma OS=Homo sapiens OX=9606 GN=TMPO PE=1 SV=2	100	0	NP_001027454.1	thymopoietin isoform beta [Homo sapiens]
Q86VS8	case2-VS-control	-1.23664	0.193332	-6.39644	8	0.000209928	0.00135881	Down	Q86VS8	Protein Hook homolog 3 OS=Homo sapiens OX=9606 GN=HOOK3 PE=1 SV=2	100	0	NP_115786.1	protein Hook homolog 3 [Homo sapiens]
Q12913	case2-VS-control	-1.17846	0.184337	-6.39298	8	0.000210703	0.00136192	Down	Q12913	Receptor-type tyrosine-protein phosphatase eta OS=Homo sapiens OX=9606 GN=PTPRJ PE=1 SV=3	100	0	NP_002834.3	receptor-type tyrosine-protein phosphatase eta isoform 1 precursor [Homo sapiens]
Q8WVQ1	case2-VS-control	1.21347	0.189956	6.38817	8	0.000211787	0.00136702	Up	Q8WVQ1	Soluble calcium-activated nucleotidase 1 OS=Homo sapiens OX=9606 GN=CANT1 PE=1 SV=1	100	0	NP_620148.1	soluble calcium-activated nucleotidase 1 [Homo sapiens]
P35270	case2-VS-control	1.56606	0.245257	6.38538	8	0.000212419	0.00136918	Up	P35270	Sepiapterin reductase OS=Homo sapiens OX=9606 GN=SPR PE=1 SV=1	100	0	NP_003115.1	sepiapterin reductase [Homo sapiens]
Q9UBU6	case2-VS-control	0.750078	0.117524	6.38232	8	0.000213114	0.00137175	None	Q9UBU6	Protein FAM8A1 OS=Homo sapiens OX=9606 GN=FAM8A1 PE=1 SV=1	100	0	NP_057339.1	protein FAM8A1 [Homo sapiens]
Q29RF7	case2-VS-control	1.08363	0.169906	6.37783	8	0.000214138	0.00137643	Up	Q29RF7	Sister chromatid cohesion protein PDS5 homolog A OS=Homo sapiens OX=9606 GN=PDS5A PE=1 SV=1	100	0	NP_001093869.1	sister chromatid cohesion protein PDS5 homolog A isoform 1 [Homo sapiens]
Q14764	case2-VS-control	0.898787	0.140957	6.37631	8	0.000214485	0.00137675	None	Q14764	Major vault protein OS=Homo sapiens OX=9606 GN=MVP PE=1 SV=4	100	0	NP_059447.2	major vault protein isoform 1 [Homo sapiens]
Q9Y383	case2-VS-control	-0.714714	0.112136	-6.37362	8	0.000215103	0.00137709	None	Q9Y383	Putative RNA-binding protein Luc7-like 2 OS=Homo sapiens OX=9606 GN=LUC7L2 PE=1 SV=2	100	0	NP_057103.2	putative RNA-binding protein Luc7-like 2 isoform 1 [Homo sapiens]
Q96TA2	case2-VS-control	0.555393	0.0871411	6.37349	8	0.000215133	0.00137709	None	Q96TA2	ATP-dependent zinc metalloprotease YME1L1 OS=Homo sapiens OX=9606 GN=YME1L1 PE=1 SV=2	100	0	NP_647473.1	ATP-dependent zinc metalloprotease YME1L1 isoform 1 [Homo sapiens]
Q9NQG5	case2-VS-control	-0.572962	0.0899326	-6.37102	8	0.000215702	0.00137793	None	Q9NQG5	Regulation of nuclear pre-mRNA domain-containing protein 1B OS=Homo sapiens OX=9606 GN=RPRD1B PE=1 SV=1	100	0	NP_067038.1	regulation of nuclear pre-mRNA domain-containing protein 1B [Homo sapiens]
Q14697	case2-VS-control	-0.676322	0.106167	-6.37034	8	0.00021586	0.00137793	None	Q14697	Neutral alpha-glucosidase AB OS=Homo sapiens OX=9606 GN=GANAB PE=1 SV=3	100	0	NP_938148.1	neutral alpha-glucosidase AB isoform 2 precursor [Homo sapiens]
P13688	case2-VS-control	4.16242	0.32598	12.7689	4	0.00021676	0.00138177	Up	P13688	Carcinoembryonic antigen-related cell adhesion molecule 1 OS=Homo sapiens OX=9606 GN=CEACAM1 PE=1 SV=2	100	0	NP_001703.2	carcinoembryonic antigen-related cell adhesion molecule 1 isoform 1 precursor [Homo sapiens]
Q9Y6X9	case2-VS-control	-1.13348	0.178157	-6.36223	8	0.000217741	0.00138611	Down	Q9Y6X9	MORC family CW-type zinc finger protein 2 OS=Homo sapiens OX=9606 GN=MORC2 PE=1 SV=2	100	0	NP_001290185.1	MORC family CW-type zinc finger protein 2 isoform 1 [Homo sapiens]
Q9Y2R5	case2-VS-control	-0.989428	0.155549	-6.36087	8	0.000218057	0.00138622	None	Q9Y2R5	28S ribosomal protein S17, mitochondrial OS=Homo sapiens OX=9606 GN=MRPS17 PE=1 SV=1	100	7e-92	NP_057053.1	28S ribosomal protein S17, mitochondrial [Homo sapiens]
Q9BRP8	case2-VS-control	1.76837	0.278293	6.35435	8	0.000219585	0.00139402	Up	Q9BRP8	Partner of Y14 and mago OS=Homo sapiens OX=9606 GN=PYM1 PE=1 SV=1	100	9e-141	NP_115721.1	partner of Y14 and mago isoform 1 [Homo sapiens]
Q8N766	case2-VS-control	0.477813	0.0752384	6.35066	8	0.000220454	0.00139727	None	Q8N766	ER membrane protein complex subunit 1 OS=Homo sapiens OX=9606 GN=EMC1 PE=1 SV=1	100	0	NP_055862.1	ER membrane protein complex subunit 1 isoform 1 precursor [Homo sapiens]
P62070	case2-VS-control	-0.710057	0.111827	-6.34961	8	0.000220702	0.00139727	None	P62070	Ras-related protein R-Ras2 OS=Homo sapiens OX=9606 GN=RRAS2 PE=1 SV=1	100	2e-150	NP_036382.2	ras-related protein R-Ras2 isoform a [Homo sapiens]
Q9H501	case2-VS-control	0.655647	0.103325	6.3455	8	0.000221678	0.00140154	None	Q9H501	ESF1 homolog OS=Homo sapiens OX=9606 GN=ESF1 PE=1 SV=1	100	0	NP_057733.2	ESF1 homolog [Homo sapiens]
Q96DH6	case2-VS-control	0.86371	0.136161	6.3433	8	0.000222201	0.00140293	None	Q96DH6	RNA-binding protein Musashi homolog 2 OS=Homo sapiens OX=9606 GN=MSI2 PE=1 SV=1	100	0	NP_620412.1	RNA-binding protein Musashi homolog 2 isoform a [Homo sapiens]
P33316	case2-VS-control	-1.82603	0.288031	-6.33971	8	0.000223057	0.00140641	Down	P33316	Deoxyuridine 5'-triphosphate nucleotidohydrolase, mitochondrial OS=Homo sapiens OX=9606 GN=DUT PE=1 SV=4	100	0	NP_001020419.1	deoxyuridine 5'-triphosphate nucleotidohydrolase, mitochondrial isoform 1 precursor [Homo sapiens]
Q8IUH4	case2-VS-control	1.65505	0.238614	6.93612	7	0.000223956	0.00141016	Up	Q8IUH4	Palmitoyltransferase ZDHHC13 OS=Homo sapiens OX=9606 GN=ZDHHC13 PE=1 SV=3	100	0	NP_061901.2	palmitoyltransferase ZDHHC13 isoform 1 [Homo sapiens]
Q6UWS5	case2-VS-control	0.657465	0.0950599	6.91633	7	0.000227963	0.00143344	None	Q6UWS5	Protein PET117 homolog, mitochondrial OS=Homo sapiens OX=9606 GN=PET117 PE=3 SV=1	100	3e-49	NP_001158283.1	protein PET117 homolog, mitochondrial precursor [Homo sapiens]
Q8TBF2	case2-VS-control	0.812861	0.128748	6.31358	8	0.000229407	0.00144038	None	Q8TBF2	Prostamide/prostaglandin F synthase OS=Homo sapiens OX=9606 GN=FAM213B PE=1 SV=1	100	1e-140	NP_689584.2	prostamide/prostaglandin F synthase isoform b [Homo sapiens]
P60903	case2-VS-control	0.72742	0.115236	6.31244	8	0.00022969	0.00144038	None	P60903	Protein S100-A10 OS=Homo sapiens OX=9606 GN=S100A10 PE=1 SV=2	100	8e-68	EAW53398.1	S100 calcium binding protein A10 (annexin II ligand, calpactin I, light polypeptide (p11)), isoform CRA_b, partial [Homo sapiens]
P02675	case2-VS-control	0.916949	0.145306	6.31048	8	0.000230175	0.00144148	None	P02675	Fibrinogen beta chain OS=Homo sapiens OX=9606 GN=FGB PE=1 SV=2	100	0	NP_005132.2	fibrinogen beta chain isoform 1 preproprotein [Homo sapiens]
O60499	case2-VS-control	-0.893316	0.141621	-6.30781	8	0.000230837	0.00144152	None	O60499	Syntaxin-10 OS=Homo sapiens OX=9606 GN=STX10 PE=1 SV=1	100	0	NP_003756.1	syntaxin-10 isoform 1 [Homo sapiens]
Q9NP80	case2-VS-control	-0.92589	0.13415	-6.90187	7	0.00023094	0.00144152	None	Q9NP80	Calcium-independent phospholipase A2-gamma OS=Homo sapiens OX=9606 GN=PNPLA8 PE=1 SV=1	100	0	NP_056538.1	calcium-independent phospholipase A2-gamma isoform 1 [Homo sapiens]
Q9NRY5	case2-VS-control	-2.36521	0.251914	-9.38895	5	0.000231116	0.00144152	Down	Q9NRY5	Protein FAM114A2 OS=Homo sapiens OX=9606 GN=FAM114A2 PE=1 SV=4	100	0	NP_061161.2	protein FAM114A2 isoform 1 [Homo sapiens]
Q9BYN8	case2-VS-control	-0.714519	0.113347	-6.3038	8	0.000231837	0.00144407	None	Q9BYN8	28S ribosomal protein S26, mitochondrial OS=Homo sapiens OX=9606 GN=MRPS26 PE=1 SV=1	100	3e-144	NP_110438.1	28S ribosomal protein S26, mitochondrial [Homo sapiens]
Q03519	case2-VS-control	-1.3105	0.207969	-6.30141	8	0.000232433	0.00144583	Down	Q03519	Antigen peptide transporter 2 OS=Homo sapiens OX=9606 GN=TAP2 PE=1 SV=1	100	0	NP_001276972.1	antigen peptide transporter 2 isoform 3 [Homo sapiens]
O60716	case2-VS-control	-1.38528	0.219937	-6.29852	8	0.000233159	0.0014484	Down	O60716	Catenin delta-1 OS=Homo sapiens OX=9606 GN=CTNND1 PE=1 SV=1	100	0	NP_001078927.1	catenin delta-1 isoform 1ABC [Homo sapiens]
Q8IY18	case2-VS-control	0.723462	0.115113	6.28478	8	0.000236641	0.00146806	None	Q8IY18	Structural maintenance of chromosomes protein 5 OS=Homo sapiens OX=9606 GN=SMC5 PE=1 SV=2	100	0	NP_055925.2	structural maintenance of chromosomes protein 5 [Homo sapiens]
Q49B96	case2-VS-control	-0.61021	0.0971246	-6.28275	8	0.000237158	0.0014693	None	Q49B96	Cytochrome c oxidase assembly protein COX19 OS=Homo sapiens OX=9606 GN=COX19 PE=1 SV=1	100	2e-59	NP_001026788.1	cytochrome c oxidase assembly protein COX19 [Homo sapiens]
Q9BW19	case2-VS-control	-0.921082	0.146635	-6.28146	8	0.000237489	0.00146939	None	Q9BW19	Kinesin-like protein KIFC1 OS=Homo sapiens OX=9606 GN=KIFC1 PE=1 SV=2	100	0	AAH63567.1	Kinesin family member C1, partial [Homo sapiens]
P61960	case2-VS-control	1.21312	0.193367	6.27369	8	0.000239492	0.0014798	Up	P61960	Ubiquitin-fold modifier 1 OS=Homo sapiens OX=9606 GN=UFM1 PE=1 SV=1	100	9e-56	NP_057701.1	ubiquitin-fold modifier 1 isoform 1 precursor [Homo sapiens]
Q14974	case2-VS-control	-0.413449	0.0660939	-6.25549	8	0.000244254	0.00150721	None	Q14974	Importin subunit beta-1 OS=Homo sapiens OX=9606 GN=KPNB1 PE=1 SV=2	100	0	NP_002256.2	importin subunit beta-1 isoform 1 [Homo sapiens]
Q9Y6X5	case2-VS-control	-1.54563	0.124953	-12.3697	4	0.000245487	0.0015128	Down	Q9Y6X5	Bis(5'-adenosyl)-triphosphatase ENPP4 OS=Homo sapiens OX=9606 GN=ENPP4 PE=1 SV=3	100	0	NP_055751.1	bis(5'-adenosyl)-triphosphatase ENPP4 precursor [Homo sapiens]
Q9NX46	case2-VS-control	0.910719	0.145771	6.24759	8	0.000246352	0.00151611	None	Q9NX46	Poly(ADP-ribose) glycohydrolase ARH3 OS=Homo sapiens OX=9606 GN=ADPRHL2 PE=1 SV=1	100	0	NP_060295.1	poly(ADP-ribose) glycohydrolase ARH3 [Homo sapiens]
Q14653	case2-VS-control	1.15995	0.150175	7.72394	6	0.000247111	0.00151785	Up	Q14653	Interferon regulatory factor 3 OS=Homo sapiens OX=9606 GN=IRF3 PE=1 SV=1	100	0	NP_001562.1	interferon regulatory factor 3 isoform 1 [Homo sapiens]
Q86TX2	case2-VS-control	-1.05558	0.169052	-6.24409	8	0.000247289	0.00151785	Down	Q86TX2	Acyl-coenzyme A thioesterase 1 OS=Homo sapiens OX=9606 GN=ACOT1 PE=1 SV=1	100	0	NP_001032238.1	acyl-coenzyme A thioesterase 1 [Homo sapiens]
Q12905	case2-VS-control	0.642064	0.102902	6.23957	8	0.000248504	0.00152328	None	Q12905	Interleukin enhancer-binding factor 2 OS=Homo sapiens OX=9606 GN=ILF2 PE=1 SV=2	100	0	NP_080650.1	interleukin enhancer-binding factor 2 [Mus musculus]
Q86YV9	case2-VS-control	0.44584	0.0715239	6.23344	8	0.000250162	0.00153141	None	Q86YV9	Hermansky-Pudlak syndrome 6 protein OS=Homo sapiens OX=9606 GN=HPS6 PE=1 SV=1	100	0	NP_079023.2	Hermansky-Pudlak syndrome 6 protein [Homo sapiens]
P10301	case2-VS-control	-0.323962	0.0520588	-6.223	8	0.000253015	0.00154532	None	P10301	Ras-related protein R-Ras OS=Homo sapiens OX=9606 GN=RRAS PE=1 SV=1	100	2e-158	NP_006261.1	ras-related protein R-Ras [Homo sapiens]
P46934	case2-VS-control	1.26124	0.202685	6.22269	8	0.000253101	0.00154532	Up	P46934	E3 ubiquitin-protein ligase NEDD4 OS=Homo sapiens OX=9606 GN=NEDD4 PE=1 SV=4	100	0	NP_001271267.1	E3 ubiquitin-protein ligase NEDD4 isoform 3 [Homo sapiens]
Q969L2	case2-VS-control	5.52819	0.269746	20.4941	3	0.000254024	0.00154891	Up	Q969L2	Protein MAL2 OS=Homo sapiens OX=9606 GN=MAL2 PE=1 SV=1	100	3e-124	NP_443118.1	protein MAL2 [Homo sapiens]
Q15046	case2-VS-control	0.618153	0.0995045	6.21232	8	0.000255971	0.00155873	None	Q15046	Lysine--tRNA ligase OS=Homo sapiens OX=9606 GN=KARS PE=1 SV=3	100	0	NP_005539.1	lysine--tRNA ligase isoform 2 [Homo sapiens]
O60831	case2-VS-control	-2.45759	0.395829	-6.20871	8	0.000256978	0.00156281	Down	O60831	PRA1 family protein 2 OS=Homo sapiens OX=9606 GN=PRAF2 PE=1 SV=1	100	4e-124	NP_009144.1	PRA1 family protein 2 [Homo sapiens]
Q14103	case2-VS-control	0.566001	0.0911966	6.20638	8	0.000257632	0.00156472	None	Q14103	Heterogeneous nuclear ribonucleoprotein D0 OS=Homo sapiens OX=9606 GN=HNRNPD PE=1 SV=1	100	0	NP_112738.1	heterogeneous nuclear ribonucleoprotein D0 isoform a [Homo sapiens]
Q6P587	case2-VS-control	-1.22755	0.197996	-6.19987	8	0.000259465	0.00157379	Down	Q6P587	Acylpyruvase FAHD1, mitochondrial OS=Homo sapiens OX=9606 GN=FAHD1 PE=1 SV=2	100	7e-166	NP_112485.1	acylpyruvase FAHD1, mitochondrial isoform 2 [Homo sapiens]
Q9H082	case2-VS-control	-0.738939	0.119221	-6.19807	8	0.000259974	0.00157399	None	Q9H082	Ras-related protein Rab-33B OS=Homo sapiens OX=9606 GN=RAB33B PE=1 SV=1	100	1e-173	NP_112586.1	ras-related protein Rab-33B [Homo sapiens]
O43795	case2-VS-control	-0.972011	0.156843	-6.19735	8	0.000260178	0.00157399	None	O43795	Unconventional myosin-Ib OS=Homo sapiens OX=9606 GN=MYO1B PE=1 SV=3	100	0	NP_001123630.1	unconventional myosin-Ib isoform 1 [Homo sapiens]
O00399	case2-VS-control	-0.780733	0.126097	-6.19154	8	0.000261832	0.00157845	None	O00399	Dynactin subunit 6 OS=Homo sapiens OX=9606 GN=DCTN6 PE=1 SV=1	100	8e-138	NP_006562.1	dynactin subunit 6 [Homo sapiens]
Q16611	case2-VS-control	-0.958486	0.154815	-6.19118	8	0.000261935	0.00157845	None	Q16611	Bcl-2 homologous antagonist/killer OS=Homo sapiens OX=9606 GN=BAK1 PE=1 SV=1	100	6e-155	NP_001179.1	bcl-2 homologous antagonist/killer [Homo sapiens]
Q86XI2	case2-VS-control	-1.0534	0.170145	-6.19117	8	0.000261938	0.00157845	Down	Q86XI2	Condensin-2 complex subunit G2 OS=Homo sapiens OX=9606 GN=NCAPG2 PE=1 SV=1	100	0	NP_060230.5	condensin-2 complex subunit G2 isoform a [Homo sapiens]
Q96S44	case2-VS-control	1.62585	0.212949	7.63492	6	0.000263422	0.00158481	Up	Q96S44	EKC/KEOPS complex subunit TP53RK OS=Homo sapiens OX=9606 GN=TP53RK PE=1 SV=2	100	0	NP_291028.3	TP53-regulating kinase [Homo sapiens]
Q9HAP6	case2-VS-control	-0.790458	0.1278	-6.1851	8	0.000263678	0.00158481	None	Q9HAP6	Protein lin-7 homolog B OS=Homo sapiens OX=9606 GN=LIN7B PE=1 SV=1	100	2e-148	NP_071448.1	protein lin-7 homolog B isoform 1 [Homo sapiens]
Q8IXQ5	case2-VS-control	-2.1183	0.27792	-7.62197	6	0.000265897	0.00159542	Down	Q8IXQ5	Kelch-like protein 7 OS=Homo sapiens OX=9606 GN=KLHL7 PE=1 SV=2	100	0	NP_001026880.2	kelch-like protein 7 isoform 1 [Homo sapiens]
Q96JQ2	case2-VS-control	1.70171	0.140439	12.117	4	0.000266133	0.00159542	Up	Q96JQ2	Calmin OS=Homo sapiens OX=9606 GN=CLMN PE=1 SV=1	100	0	NP_079010.2	calmin [Homo sapiens]
Q96AE4	case2-VS-control	0.488353	0.0792234	6.16426	8	0.000269752	0.00161384	None	Q96AE4	Far upstream element-binding protein 1 OS=Homo sapiens OX=9606 GN=FUBP1 PE=1 SV=3	100	0	XP_008958166.1	PREDICTED: far upstream element-binding protein 1 isoform X1 [Pan paniscus]
Q96HD1	case2-VS-control	-1.49398	0.196543	-7.60129	6	0.000269903	0.00161384	Down	Q96HD1	Cysteine-rich with EGF-like domain protein 1 OS=Homo sapiens OX=9606 GN=CRELD1 PE=1 SV=3	100	0	XP_016862664.1	PREDICTED: cysteine-rich with EGF-like domain protein 1 isoform X2 [Homo sapiens]
Q13472	case2-VS-control	-2.2038	0.357828	-6.15881	8	0.000271365	0.00162049	Down	Q13472	DNA topoisomerase 3-alpha OS=Homo sapiens OX=9606 GN=TOP3A PE=1 SV=1	100	0	NP_004609.1	DNA topoisomerase 3-alpha isoform 1 [Homo sapiens]
Q9NYH9	case2-VS-control	0.543384	0.088366	6.14924	8	0.000274223	0.00163544	None	Q9NYH9	U3 small nucleolar RNA-associated protein 6 homolog OS=Homo sapiens OX=9606 GN=UTP6 PE=2 SV=2	100	0	NP_060898.2	U3 small nucleolar RNA-associated protein 6 homolog [Homo sapiens]
P11171	case2-VS-control	0.955667	0.155461	6.14731	8	0.000274804	0.0016368	None	P11171	Protein 4.1 OS=Homo sapiens OX=9606 GN=EPB41 PE=1 SV=4	100	0	NP_001159477.1	protein 4.1 isoform 1 [Homo sapiens]
Q9P0J0	case2-VS-control	0.396248	0.0644822	6.14508	8	0.000275478	0.0016387	None	Q9P0J0	NADH dehydrogenase [ubiquinone] 1 alpha subcomplex subunit 13 OS=Homo sapiens OX=9606 GN=NDUFA13 PE=1 SV=3	100	5e-103	AAH00589.2	NDUFA13 protein, partial [Homo sapiens]
P36776	case2-VS-control	0.655668	0.106888	6.13413	8	0.000278805	0.00165637	None	P36776	Lon protease homolog, mitochondrial OS=Homo sapiens OX=9606 GN=LONP1 PE=1 SV=2	100	0	NP_004784.2	lon protease homolog, mitochondrial isoform 1 precursor [Homo sapiens]
P50479	case2-VS-control	-2.12624	0.281839	-7.54417	6	0.00028134	0.00166928	Down	P50479	PDZ and LIM domain protein 4 OS=Homo sapiens OX=9606 GN=PDLIM4 PE=1 SV=2	100	0	NP_003678.2	PDZ and LIM domain protein 4 isoform 1 [Homo sapiens]
O43143	case2-VS-control	0.710298	0.11605	6.1206	8	0.00028298	0.00167687	None	O43143	Pre-mRNA-splicing factor ATP-dependent RNA helicase DHX15 OS=Homo sapiens OX=9606 GN=DHX15 PE=1 SV=2	100	0	NP_001349.2	pre-mRNA-splicing factor ATP-dependent RNA helicase DHX15 [Homo sapiens]
O95487	case2-VS-control	0.824805	0.134911	6.11369	8	0.000285139	0.0016875	None	O95487	Protein transport protein Sec24B OS=Homo sapiens OX=9606 GN=SEC24B PE=1 SV=2	100	0	NP_006314.2	protein transport protein Sec24B isoform a [Homo sapiens]
P82932	case2-VS-control	-0.713765	0.116779	-6.11211	8	0.000285638	0.00168829	None	P82932	28S ribosomal protein S6, mitochondrial OS=Homo sapiens OX=9606 GN=MRPS6 PE=1 SV=3	100	9e-88	NP_115865.1	28S ribosomal protein S6, mitochondrial [Homo sapiens]
Q96QC0	case2-VS-control	-0.932566	0.140037	-6.6594	7	0.000288011	0.00170014	None	Q96QC0	Serine/threonine-protein phosphatase 1 regulatory subunit 10 OS=Homo sapiens OX=9606 GN=PPP1R10 PE=1 SV=1	100	0	NP_002705.2	serine/threonine-protein phosphatase 1 regulatory subunit 10 [Homo sapiens]
Q6UWB1	case2-VS-control	-1.94442	0.16408	-11.8504	4	0.000290318	0.00171158	Down	Q6UWB1	Interleukin-27 receptor subunit alpha OS=Homo sapiens OX=9606 GN=IL27RA PE=2 SV=2	100	0	NP_004834.1	interleukin-27 receptor subunit alpha precursor [Homo sapiens]
O94776	case2-VS-control	-0.833192	0.13674	-6.09325	8	0.000291631	0.00171714	None	O94776	Metastasis-associated protein MTA2 OS=Homo sapiens OX=9606 GN=MTA2 PE=1 SV=1	100	0	NP_004730.2	metastasis-associated protein MTA2 isoform 1 [Homo sapiens]
Q9H553	case2-VS-control	0.49991	0.0821244	6.08723	8	0.000293575	0.00172639	None	Q9H553	Alpha-1,3/1,6-mannosyltransferase ALG2 OS=Homo sapiens OX=9606 GN=ALG2 PE=1 SV=1	100	0	NP_149078.1	alpha-1,3/1,6-mannosyltransferase ALG2 [Homo sapiens]
P06744	case2-VS-control	2.20106	0.362105	6.07852	8	0.000296414	0.00174087	Up	P06744	Glucose-6-phosphate isomerase OS=Homo sapiens OX=9606 GN=GPI PE=1 SV=4	100	0	NP_001276718.1	glucose-6-phosphate isomerase isoform 3 [Homo sapiens]
Q8IV08	case2-VS-control	-0.504853	0.083149	-6.07167	8	0.000298666	0.00175187	None	Q8IV08	Phospholipase D3 OS=Homo sapiens OX=9606 GN=PLD3 PE=1 SV=1	100	0	NP_001026866.1	phospholipase D3 [Homo sapiens]
Q8NFU3	case2-VS-control	3.47801	0.180483	19.2705	3	0.000305207	0.001786	Up	Q8NFU3	Thiosulfate:glutathione sulfurtransferase OS=Homo sapiens OX=9606 GN=TSTD1 PE=1 SV=3	100	5e-78	NP_001106678.1	thiosulfate sulfurtransferase/rhodanese-like domain-containing protein 1 isoform 1 [Homo sapiens]
Q9BY32	case2-VS-control	3.35033	0.507884	6.59665	7	0.000305256	0.001786	Up	Q9BY32	Inosine triphosphate pyrophosphatase OS=Homo sapiens OX=9606 GN=ITPA PE=1 SV=2	100	2e-141	NP_258412.1	inosine triphosphate pyrophosphatase isoform a [Homo sapiens]
Q8NBN7	case2-VS-control	1.30232	0.215499	6.04325	8	0.000308213	0.00180102	Up	Q8NBN7	Retinol dehydrogenase 13 OS=Homo sapiens OX=9606 GN=RDH13 PE=1 SV=2	100	0	NP_001139443.1	retinol dehydrogenase 13 isoform 1 precursor [Homo sapiens]
Q9H4L7	case2-VS-control	1.31435	0.217795	6.0348	8	0.000311115	0.00181445	Up	Q9H4L7	SWI/SNF-related matrix-associated actin-dependent regulator of chromatin subfamily A containing DEAD/H box 1 OS=Homo sapiens OX=9606 GN=SMARCAD1 PE=1 SV=2	100	0	NP_064544.2	SWI/SNF-related matrix-associated actin-dependent regulator of chromatin subfamily A containing DEAD/H box 1 isoform b [Homo sapiens]
Q9BXV9	case2-VS-control	1.5034	0.228643	6.57535	7	0.000311372	0.00181445	Up	Q9BXV9	EKC/KEOPS complex subunit GON7 OS=Homo sapiens OX=9606 GN=GON7 PE=1 SV=2	100	6e-67	NP_115879.2	EKC/KEOPS complex subunit GON7 [Homo sapiens]
O95295	case2-VS-control	1.29109	0.214	6.03315	8	0.000311687	0.00181445	Up	O95295	SNARE-associated protein Snapin OS=Homo sapiens OX=9606 GN=SNAPIN PE=1 SV=1	100	2e-94	NP_036569.1	SNARE-associated protein Snapin [Homo sapiens]
P02545	case2-VS-control	1.76989	0.293908	6.02192	8	0.000315598	0.00183491	Up	P02545	Prelamin-A/C OS=Homo sapiens OX=9606 GN=LMNA PE=1 SV=1	100	0	NP_733821.1	lamin isoform A [Homo sapiens]
O43290	case2-VS-control	-0.521279	0.0866391	-6.01667	8	0.000317447	0.00184334	None	O43290	U4/U6.U5 tri-snRNP-associated protein 1 OS=Homo sapiens OX=9606 GN=SART1 PE=1 SV=1	100	0	NP_005137.1	U4/U6.U5 tri-snRNP-associated protein 1 [Homo sapiens]
O75298	case2-VS-control	4.02995	0.348083	11.5776	4	0.000317968	0.00184406	Up	O75298	Reticulon-2 OS=Homo sapiens OX=9606 GN=RTN2 PE=1 SV=1	100	0	NP_005610.1	reticulon-2 isoform A [Homo sapiens]
P06865	case2-VS-control	0.539239	0.0897385	6.00901	8	0.000320164	0.00185447	None	P06865	Beta-hexosaminidase subunit alpha OS=Homo sapiens OX=9606 GN=HEXA PE=1 SV=2	100	0	NP_000511.2	beta-hexosaminidase subunit alpha isoform 2 preproprotein [Homo sapiens]
Q09666	case2-VS-control	-1.2108	0.201782	-6.00053	8	0.000323201	0.00186972	Down	Q09666	Neuroblast differentiation-associated protein AHNAK OS=Homo sapiens OX=9606 GN=AHNAK PE=1 SV=2	100	0	NP_001611.1	neuroblast differentiation-associated protein AHNAK isoform 1 [Homo sapiens]
P61020	case2-VS-control	-0.750824	0.125221	-5.99598	8	0.000324846	0.00187504	None	P61020	Ras-related protein Rab-5B OS=Homo sapiens OX=9606 GN=RAB5B PE=1 SV=1	100	3e-161	NP_002859.1	ras-related protein Rab-5B isoform 1 [Homo sapiens]
P41743	case2-VS-control	1.48788	0.248157	5.99574	8	0.000324932	0.00187504	Up	P41743	Protein kinase C iota type OS=Homo sapiens OX=9606 GN=PRKCI PE=1 SV=2	100	0	NP_002731.4	protein kinase C iota type [Homo sapiens]
P82921	case2-VS-control	-0.609726	0.101873	-5.98514	8	0.000328799	0.001895	None	P82921	28S ribosomal protein S21, mitochondrial OS=Homo sapiens OX=9606 GN=MRPS21 PE=1 SV=3	98.851	1e-57	NP_114107.1	28S ribosomal protein S21, mitochondrial [Homo sapiens]
P36969	case2-VS-control	1.4111	0.236893	5.9567	8	0.000339421	0.00195378	Up	P36969	Phospholipid hydroperoxide glutathione peroxidase OS=Homo sapiens OX=9606 GN=GPX4 PE=1 SV=3	99.492	3e-146	CAA50793.1	phospholipid hydroperoxide glutathione peroxidase [Homo sapiens]
Q9Y5W9	case2-VS-control	-1.05895	0.177812	-5.95546	8	0.000339892	0.00195406	Down	Q9Y5W9	Sorting nexin-11 OS=Homo sapiens OX=9606 GN=SNX11 PE=1 SV=2	100	0	NP_037455.2	sorting nexin-11 isoform 1 [Homo sapiens]
O95169	case2-VS-control	0.361843	0.0607906	5.95228	8	0.000341106	0.00195861	None	O95169	NADH dehydrogenase [ubiquinone] 1 beta subcomplex subunit 8, mitochondrial OS=Homo sapiens OX=9606 GN=NDUFB8 PE=1 SV=1	100	2e-137	NP_004995.1	NADH dehydrogenase [ubiquinone] 1 beta subcomplex subunit 8, mitochondrial isoform 1 precursor [Homo sapiens]
Q9Y6M1	case2-VS-control	-0.805689	0.1355	-5.94606	8	0.00034349	0.00196985	None	Q9Y6M1	Insulin-like growth factor 2 mRNA-binding protein 2 OS=Homo sapiens OX=9606 GN=IGF2BP2 PE=1 SV=2	100	0	NP_006539.3	insulin-like growth factor 2 mRNA-binding protein 2 isoform a [Homo sapiens]
O75787	case2-VS-control	-1.67024	0.281167	-5.94038	8	0.000345685	0.00197999	Down	O75787	Renin receptor OS=Homo sapiens OX=9606 GN=ATP6AP2 PE=1 SV=2	100	0	NP_005756.2	renin receptor precursor [Homo sapiens]
O60493	case2-VS-control	0.870483	0.146619	5.93703	8	0.000346989	0.001985	None	O60493	Sorting nexin-3 OS=Homo sapiens OX=9606 GN=SNX3 PE=1 SV=3	100	1e-117	NP_003786.1	sorting nexin-3 isoform a [Homo sapiens]
P62280	case2-VS-control	1.22753	0.207014	5.92969	8	0.000349862	0.00199896	Up	P62280	40S ribosomal protein S11 OS=Homo sapiens OX=9606 GN=RPS11 PE=1 SV=3	100	1e-113	XP_010991488.1	PREDICTED: 40S ribosomal protein S11 [Camelus dromedarius]
P22059	case2-VS-control	0.913181	0.154448	5.91255	8	0.00035667	0.00203535	None	P22059	Oxysterol-binding protein 1 OS=Homo sapiens OX=9606 GN=OSBP PE=1 SV=1	100	0	NP_002547.1	oxysterol-binding protein 1 [Homo sapiens]
O15381	case2-VS-control	0.449675	0.0761149	5.90785	8	0.000358562	0.00204363	None	O15381	Nuclear valosin-containing protein-like OS=Homo sapiens OX=9606 GN=NVL PE=1 SV=1	100	0	NP_002524.2	nuclear valosin-containing protein-like isoform 1 [Homo sapiens]
Q5VTL8	case2-VS-control	0.670638	0.113676	5.89956	8	0.000361925	0.00205781	None	Q5VTL8	Pre-mRNA-splicing factor 38B OS=Homo sapiens OX=9606 GN=PRPF38B PE=1 SV=1	100	0	NP_060531.2	pre-mRNA-splicing factor 38B isoform a [Homo sapiens]
Q8IWA5	case2-VS-control	-1.62836	0.276015	-5.89952	8	0.000361941	0.00205781	Down	Q8IWA5	Choline transporter-like protein 2 OS=Homo sapiens OX=9606 GN=SLC44A2 PE=1 SV=3	99.858	0	CBJ93592.1	solute carrier family 44, member 2 [Homo sapiens]
P31949	case2-VS-control	3.37954	0.573001	5.89796	8	0.000362577	0.00205891	Up	P31949	Protein S100-A11 OS=Homo sapiens OX=9606 GN=S100A11 PE=1 SV=2	100	3e-73	NP_005611.1	protein S100-A11 [Homo sapiens]
Q9NZL4	case2-VS-control	1.89438	0.321476	5.89276	8	0.000364711	0.00206848	Up	Q9NZL4	Hsp70-binding protein 1 OS=Homo sapiens OX=9606 GN=HSPBP1 PE=1 SV=2	100	0	NP_036399.3	hsp70-binding protein 1 isoform 2 [Homo sapiens]
O95864	case2-VS-control	-4.23534	0.233708	-18.1224	3	0.000366509	0.00207614	Down	O95864	Fatty acid desaturase 2 OS=Homo sapiens OX=9606 GN=FADS2 PE=1 SV=1	100	0	NP_004256.1	fatty acid desaturase 2 isoform 1 [Homo sapiens]
Q9NZ43	case2-VS-control	0.724675	0.123131	5.8854	8	0.000367753	0.00208027	None	Q9NZ43	Vesicle transport protein USE1 OS=Homo sapiens OX=9606 GN=USE1 PE=1 SV=2	100	0	XP_016882464.1	PREDICTED: vesicle transport protein USE1 isoform X1 [Homo sapiens]
P55265	case2-VS-control	0.746132	0.126801	5.88426	8	0.000368226	0.00208027	None	P55265	Double-stranded RNA-specific adenosine deaminase OS=Homo sapiens OX=9606 GN=ADAR PE=1 SV=4	100	0	P55265.4	RecName: Full=Double-stranded RNA-specific adenosine deaminase; Short=DRADA; AltName: Full=136 kDa double-stranded RNA-binding protein; Short=p136; AltName: Full=Interferon-inducible protein 4; Short=IFI-4; AltName: Full=K88DSRBP
Q4G0J3	case2-VS-control	0.624192	0.106095	5.88334	8	0.000368609	0.00208027	None	Q4G0J3	La-related protein 7 OS=Homo sapiens OX=9606 GN=LARP7 PE=1 SV=1	100	0	NP_001253968.1	la-related protein 7 isoform 2 [Homo sapiens]
Q6NUQ4	case2-VS-control	-0.447679	0.076106	-5.88231	8	0.000369037	0.00208027	None	Q6NUQ4	Transmembrane protein 214 OS=Homo sapiens OX=9606 GN=TMEM214 PE=1 SV=2	100	0	NP_060197.4	transmembrane protein 214 isoform 1 [Homo sapiens]
Q9NPE2	case2-VS-control	1.16559	0.198247	5.87947	8	0.000370223	0.00208442	Up	Q9NPE2	Neugrin OS=Homo sapiens OX=9606 GN=NGRN PE=1 SV=2	100	0	NP_001028260.2	neugrin precursor [Homo sapiens]
Q96ST3	case2-VS-control	-1.10154	0.187412	-5.87763	8	0.000370995	0.00208623	Down	Q96ST3	Paired amphipathic helix protein Sin3a OS=Homo sapiens OX=9606 GN=SIN3A PE=1 SV=2	100	0	NP_056292.1	paired amphipathic helix protein Sin3a [Homo sapiens]
Q9BZF1	case2-VS-control	0.719363	0.122444	5.87505	8	0.000372077	0.00208977	None	Q9BZF1	Oxysterol-binding protein-related protein 8 OS=Homo sapiens OX=9606 GN=OSBPL8 PE=1 SV=3	100	0	NP_065892.1	oxysterol-binding protein-related protein 8 isoform a [Homo sapiens]
Q8N2G8	case2-VS-control	1.06997	0.182907	5.84981	8	0.000382861	0.00214637	Up	Q8N2G8	GH3 domain-containing protein OS=Homo sapiens OX=9606 GN=GHDC PE=1 SV=2	100	0	NP_115873.1	GH3 domain-containing protein isoform 1 precursor [Homo sapiens]
P27824	case2-VS-control	-0.732201	0.125196	-5.84846	8	0.000383448	0.00214637	None	P27824	Calnexin OS=Homo sapiens OX=9606 GN=CANX PE=1 SV=2	100	0	XP_011532966.1	PREDICTED: calnexin isoform X2 [Homo sapiens]
Q969Q5	case2-VS-control	-2.18883	0.374273	-5.84823	8	0.000383545	0.00214637	Down	Q969Q5	Ras-related protein Rab-24 OS=Homo sapiens OX=9606 GN=RAB24 PE=1 SV=1	100	3e-150	NP_001026847.1	ras-related protein Rab-24 [Homo sapiens]
Q92817	case2-VS-control	3.70026	0.583273	6.34396	7	0.000387461	0.00216567	Up	Q92817	Envoplakin OS=Homo sapiens OX=9606 GN=EVPL PE=1 SV=3	100	0	NP_001979.2	envoplakin isoform 2 [Homo sapiens]
Q9BRU9	case2-VS-control	-0.559669	0.0958845	-5.83691	8	0.000388503	0.00216887	None	Q9BRU9	rRNA-processing protein UTP23 homolog OS=Homo sapiens OX=9606 GN=UTP23 PE=1 SV=2	100	0	NP_115710.2	rRNA-processing protein UTP23 homolog [Homo sapiens]
Q13686	case2-VS-control	0.627218	0.107566	5.83103	8	0.000391105	0.00217838	None	Q13686	Nucleic acid dioxygenase ALKBH1 OS=Homo sapiens OX=9606 GN=ALKBH1 PE=1 SV=2	100	0	NP_006011.2	nucleic acid dioxygenase ALKBH1 [Homo sapiens]
Q9BR76	case2-VS-control	0.639188	0.10962	5.83093	8	0.000391149	0.00217838	None	Q9BR76	Coronin-1B OS=Homo sapiens OX=9606 GN=CORO1B PE=1 SV=1	100	0	NP_065174.1	coronin-1B [Homo sapiens]
Q9BXP5	case2-VS-control	-0.785689	0.1348	-5.82856	8	0.000392207	0.00218165	None	Q9BXP5	Serrate RNA effector molecule homolog OS=Homo sapiens OX=9606 GN=SRRT PE=1 SV=1	100	0	XP_005250462.1	PREDICTED: serrate RNA effector molecule homolog isoform X1 [Homo sapiens]
O95478	case2-VS-control	0.788495	0.135452	5.8212	8	0.000395501	0.00219707	None	O95478	Ribosome biogenesis protein NSA2 homolog OS=Homo sapiens OX=9606 GN=NSA2 PE=1 SV=1	100	0	NP_055701.1	ribosome biogenesis protein NSA2 homolog isoform 1 [Homo sapiens]
Q96GX5	case2-VS-control	-1.77827	0.281308	-6.32142	7	0.000395928	0.00219707	Down	Q96GX5	Serine/threonine-protein kinase greatwall OS=Homo sapiens OX=9606 GN=MASTL PE=1 SV=1	100	0	NP_001165774.1	serine/threonine-protein kinase greatwall isoform 1 [Homo sapiens]
Q15417	case2-VS-control	-0.976917	0.16805	-5.81324	8	0.000399097	0.002212	None	Q15417	Calponin-3 OS=Homo sapiens OX=9606 GN=CNN3 PE=1 SV=1	100	0	NP_001830.1	calponin-3 isoform 1 [Homo sapiens]
Q8N5M1	case2-VS-control	-1.10515	0.190441	-5.80312	8	0.000403727	0.00223499	Down	Q8N5M1	ATP synthase mitochondrial F1 complex assembly factor 2 OS=Homo sapiens OX=9606 GN=ATPAF2 PE=1 SV=1	100	0	NP_663729.1	ATP synthase mitochondrial F1 complex assembly factor 2 [Homo sapiens]
O00746	case2-VS-control	-1.09036	0.173131	-6.29787	7	0.000404995	0.00223933	Down	O00746	Nucleoside diphosphate kinase, mitochondrial OS=Homo sapiens OX=9606 GN=NME4 PE=1 SV=1	100	4e-134	NP_005000.1	nucleoside diphosphate kinase, mitochondrial isoform a precursor [Homo sapiens]
P04406	case2-VS-control	0.579121	0.0998825	5.79802	8	0.000406078	0.00224263	None	P04406	Glyceraldehyde-3-phosphate dehydrogenase OS=Homo sapiens OX=9606 GN=GAPDH PE=1 SV=3	99.403	0	XP_003273771.1	PREDICTED: glyceraldehyde-3-phosphate dehydrogenase isoform X1 [Nomascus leucogenys]
O00165	case2-VS-control	0.64747	0.111715	5.79575	8	0.000407129	0.00224567	None	O00165	HCLS1-associated protein X-1 OS=Homo sapiens OX=9606 GN=HAX1 PE=1 SV=2	100	0	NP_006109.2	HCLS1-associated protein X-1 isoform a [Homo sapiens]
O43933	case2-VS-control	0.434525	0.074986	5.79474	8	0.000407598	0.00224567	None	O43933	Peroxisome biogenesis factor 1 OS=Homo sapiens OX=9606 GN=PEX1 PE=1 SV=1	100	0	NP_000457.1	peroxisome biogenesis factor 1 isoform 1 [Homo sapiens]
Q99797	case2-VS-control	0.896682	0.154839	5.79105	8	0.000409322	0.00225249	None	Q99797	Mitochondrial intermediate peptidase OS=Homo sapiens OX=9606 GN=MIPEP PE=1 SV=2	100	0	Q99797.2	RecName: Full=Mitochondrial intermediate peptidase; Short=MIP; Flags: Precursor
Q9Y570	case2-VS-control	-1.74308	0.301152	-5.78803	8	0.000410731	0.00225756	Down	Q9Y570	Protein phosphatase methylesterase 1 OS=Homo sapiens OX=9606 GN=PPME1 PE=1 SV=3	100	0	NP_057231.1	protein phosphatase methylesterase 1 isoform a [Homo sapiens]
Q15126	case2-VS-control	1.11705	0.193092	5.78505	8	0.000412133	0.00226257	Up	Q15126	Phosphomevalonate kinase OS=Homo sapiens OX=9606 GN=PMVK PE=1 SV=3	100	2e-139	NP_006547.1	phosphomevalonate kinase isoform 1 [Homo sapiens]
P52888	case2-VS-control	1.73421	0.276377	6.27481	7	0.000414101	0.00226813	Up	P52888	Thimet oligopeptidase OS=Homo sapiens OX=9606 GN=THOP1 PE=1 SV=2	100	0	NP_003240.1	thimet oligopeptidase [Homo sapiens]
Q8NCF5	case2-VS-control	-0.972146	0.168197	-5.7798	8	0.000414611	0.00226813	None	Q8NCF5	NFATC2-interacting protein OS=Homo sapiens OX=9606 GN=NFATC2IP PE=1 SV=1	100	0	NP_116204.3	NFATC2-interacting protein [Homo sapiens]
Q8IYS2	case2-VS-control	0.54639	0.0945346	5.77979	8	0.000414614	0.00226813	None	Q8IYS2	Uncharacterized protein KIAA2013 OS=Homo sapiens OX=9606 GN=KIAA2013 PE=1 SV=1	100	0	NP_612355.1	uncharacterized protein KIAA2013 precursor [Homo sapiens]
P62714	case2-VS-control	0.765205	0.132432	5.77812	8	0.000415409	0.00226979	None	P62714;P67775	Serine/threonine-protein phosphatase 2A catalytic subunit beta isoform OS=Homo sapiens OX=9606 GN=PPP2CB PE=1 SV=1	100	0	NP_058736.1	serine/threonine-protein phosphatase 2A catalytic subunit beta isoform [Rattus norvegicus]
Q08431	case2-VS-control	-1.73601	0.247195	-7.02284	6	0.000416063	0.00227069	Down	Q08431	Lactadherin OS=Homo sapiens OX=9606 GN=MFGE8 PE=1 SV=3	100	0	NP_005919.2	lactadherin isoform a preproprotein [Homo sapiens]
P82933	case2-VS-control	-0.999496	0.173058	-5.7755	8	0.000416654	0.00227123	None	P82933	28S ribosomal protein S9, mitochondrial OS=Homo sapiens OX=9606 GN=MRPS9 PE=1 SV=2	100	0	NP_872578.1	28S ribosomal protein S9, mitochondrial [Homo sapiens]
Q9Y2U8	case2-VS-control	1.05929	0.183643	5.76822	8	0.000420135	0.00228751	Up	Q9Y2U8	Inner nuclear membrane protein Man1 OS=Homo sapiens OX=9606 GN=LEMD3 PE=1 SV=2	100	0	NP_055134.2	inner nuclear membrane protein Man1 isoform 1 [Homo sapiens]
P27707	case2-VS-control	-0.731726	0.104474	-7.00391	6	0.000422203	0.00229607	None	P27707	Deoxycytidine kinase OS=Homo sapiens OX=9606 GN=DCK PE=1 SV=1	100	0	NP_000779.1	deoxycytidine kinase [Homo sapiens]
O60306	case2-VS-control	-0.508214	0.0882446	-5.75915	8	0.000424522	0.00230597	None	O60306	RNA helicase aquarius OS=Homo sapiens OX=9606 GN=AQR PE=1 SV=4	100	0	NP_055506.1	intron-binding protein aquarius [Homo sapiens]
Q8N6T3	case2-VS-control	-0.466203	0.0809834	-5.75676	8	0.000425684	0.00230957	None	Q8N6T3	ADP-ribosylation factor GTPase-activating protein 1 OS=Homo sapiens OX=9606 GN=ARFGAP1 PE=1 SV=2	100	0	NP_060679.1	ADP-ribosylation factor GTPase-activating protein 1 isoform a [Homo sapiens]
Q9H4G0	case2-VS-control	1.28956	0.224259	5.75034	8	0.00042883	0.00232392	Up	Q9H4G0	Band 4.1-like protein 1 OS=Homo sapiens OX=9606 GN=EPB41L1 PE=1 SV=2	100	0	NP_036288.2	band 4.1-like protein 1 isoform a [Homo sapiens]
Q8N1G2	case2-VS-control	-0.705874	0.123028	-5.7375	8	0.000435195	0.00235565	None	Q8N1G2	Cap-specific mRNA (nucleoside-2'-O-)-methyltransferase 1 OS=Homo sapiens OX=9606 GN=CMTR1 PE=1 SV=1	100	0	NP_055865.1	cap-specific mRNA (nucleoside-2'-O-)-methyltransferase 1 [Homo sapiens]
P82663	case2-VS-control	-1.11038	0.193585	-5.73588	8	0.000436005	0.00235728	Down	P82663	28S ribosomal protein S25, mitochondrial OS=Homo sapiens OX=9606 GN=MRPS25 PE=1 SV=1	100	3e-127	NP_071942.1	28S ribosomal protein S25, mitochondrial [Homo sapiens]
Q6SPF0	case2-VS-control	-1.48837	0.239279	-6.22024	7	0.000436572	0.00235759	Down	Q6SPF0	Atherin OS=Homo sapiens OX=9606 GN=SAMD1 PE=1 SV=1	100	0	NP_612361.1	atherin [Homo sapiens]
P26440	case2-VS-control	-0.751093	0.131026	-5.73241	8	0.000437745	0.00236117	None	P26440	Isovaleryl-CoA dehydrogenase, mitochondrial OS=Homo sapiens OX=9606 GN=IVD PE=1 SV=2	100	0	NP_002216.2	isovaleryl-CoA dehydrogenase, mitochondrial isoform 1 precursor [Homo sapiens]
O96005	case2-VS-control	2.33462	0.375875	6.21117	7	0.000440441	0.00236968	Up	O96005	Cleft lip and palate transmembrane protein 1 OS=Homo sapiens OX=9606 GN=CLPTM1 PE=1 SV=1	100	0	NP_001285.1	cleft lip and palate transmembrane protein 1 isoform 2 [Homo sapiens]
Q9UGH3	case2-VS-control	1.44606	0.135827	10.6463	4	0.000440787	0.00236968	Up	Q9UGH3	Solute carrier family 23 member 2 OS=Homo sapiens OX=9606 GN=SLC23A2 PE=1 SV=1	100	0	NP_005107.4	solute carrier family 23 member 2 [Homo sapiens]
Q9UM54	case2-VS-control	1.57367	0.274817	5.72624	8	0.000440859	0.00236968	Up	Q9UM54	Unconventional myosin-VI OS=Homo sapiens OX=9606 GN=MYO6 PE=1 SV=4	100	0	Q9UM54.4	RecName: Full=Unconventional myosin-VI; AltName: Full=Unconventional myosin-6
Q15392	case2-VS-control	-0.534766	0.0934318	-5.7236	8	0.000442199	0.00237412	None	Q15392	Delta(24)-sterol reductase OS=Homo sapiens OX=9606 GN=DHCR24 PE=1 SV=2	100	0	NP_055577.1	delta(24)-sterol reductase precursor [Homo sapiens]
Q9BQG0	case2-VS-control	0.687712	0.12027	5.71805	8	0.000445033	0.00238657	None	Q9BQG0	Myb-binding protein 1A OS=Homo sapiens OX=9606 GN=MYBBP1A PE=1 SV=2	100	0	NP_055335.2	myb-binding protein 1A isoform 2 [Homo sapiens]
P30043	case2-VS-control	2.57683	0.451289	5.70992	8	0.000449214	0.00240602	Up	P30043	Flavin reductase (NADPH) OS=Homo sapiens OX=9606 GN=BLVRB PE=1 SV=3	100	2e-149	NP_000704.1	flavin reductase (NADPH) [Homo sapiens]
P62081	case2-VS-control	1.01556	0.177888	5.70899	8	0.000449699	0.00240602	Up	P62081	40S ribosomal protein S7 OS=Homo sapiens OX=9606 GN=RPS7 PE=1 SV=1	100	6e-137	NP_001002.1	40S ribosomal protein S7 [Homo sapiens]
Q9BZH6	case2-VS-control	1.87169	0.328226	5.70244	8	0.000453103	0.00242023	Up	Q9BZH6	WD repeat-containing protein 11 OS=Homo sapiens OX=9606 GN=WDR11 PE=1 SV=1	100	0	NP_060587.8	WD repeat-containing protein 11 [Homo sapiens]
P08559	case2-VS-control	-0.622849	0.109253	-5.70099	8	0.00045386	0.00242023	None	P08559	Pyruvate dehydrogenase E1 component subunit alpha, somatic form, mitochondrial OS=Homo sapiens OX=9606 GN=PDHA1 PE=1 SV=3	100	0	NP_000275.1	pyruvate dehydrogenase E1 component subunit alpha, somatic form, mitochondrial isoform 1 precursor [Homo sapiens]
Q15746	case2-VS-control	-0.806767	0.141516	-5.70087	8	0.000453924	0.00242023	None	Q15746	Myosin light chain kinase, smooth muscle OS=Homo sapiens OX=9606 GN=MYLK PE=1 SV=4	100	0	NP_444253.3	myosin light chain kinase, smooth muscle isoform 1 [Homo sapiens]
O75843	case2-VS-control	2.73006	0.335603	8.1348	5	0.000455726	0.00242697	Up	O75843	AP-1 complex subunit gamma-like 2 OS=Homo sapiens OX=9606 GN=AP1G2 PE=1 SV=1	100	0	NP_003908.1	AP-1 complex subunit gamma-like 2 isoform 1 [Homo sapiens]
P41250	case2-VS-control	1.28722	0.225967	5.69647	8	0.000456236	0.00242697	Up	P41250	Glycine--tRNA ligase OS=Homo sapiens OX=9606 GN=GARS PE=1 SV=3	100	0	NP_002038.2	glycine--tRNA ligase isoform 1 precursor [Homo sapiens]
O75153	case2-VS-control	1.61972	0.284624	5.69073	8	0.000459267	0.00244029	Up	O75153	Clustered mitochondria protein homolog OS=Homo sapiens OX=9606 GN=CLUH PE=1 SV=2	100	0	NP_056044.3	clustered mitochondria protein homolog [Homo sapiens]
P24928	case2-VS-control	0.264435	0.04651	5.68555	8	0.00046202	0.0024521	None	P24928	DNA-directed RNA polymerase II subunit RPB1 OS=Homo sapiens OX=9606 GN=POLR2A PE=1 SV=2	100	0	P24928.2	RecName: Full=DNA-directed RNA polymerase II subunit RPB1; Short=RNA polymerase II subunit B1; AltName: Full=DNA-directed RNA polymerase II subunit A; AltName: Full=DNA-directed RNA polymerase III largest subunit; AltName: Full=RNA-directed RNA polymerase II subunit RPB1
Q9H081	case2-VS-control	-1.3984	0.246016	-5.68419	8	0.000462747	0.00245314	Down	Q9H081	Protein MIS12 homolog OS=Homo sapiens OX=9606 GN=MIS12 PE=1 SV=1	100	6e-149	NP_076944.1	protein MIS12 homolog [Homo sapiens]
P12429	case2-VS-control	3.20911	0.564711	5.68274	8	0.000463522	0.00245444	Up	P12429	Annexin A3 OS=Homo sapiens OX=9606 GN=ANXA3 PE=1 SV=3	100	0	NP_005130.1	annexin A3 [Homo sapiens]
P09601	case2-VS-control	1.99408	0.289894	6.87865	6	0.000465558	0.0024624	Up	P09601	Heme oxygenase 1 OS=Homo sapiens OX=9606 GN=HMOX1 PE=1 SV=1	100	0	NP_002124.1	heme oxygenase 1 [Homo sapiens]
Q86UE4	case2-VS-control	0.571076	0.10063	5.67501	8	0.000467683	0.00247082	None	Q86UE4	Protein LYRIC OS=Homo sapiens OX=9606 GN=MTDH PE=1 SV=2	100	0	NP_848927.2	protein LYRIC [Homo sapiens]
Q9UNF1	case2-VS-control	-2.00292	0.353357	-5.66825	8	0.000471351	0.00248736	Down	Q9UNF1	Melanoma-associated antigen D2 OS=Homo sapiens OX=9606 GN=MAGED2 PE=1 SV=2	100	0	NP_055414.2	melanoma-associated antigen D2 [Homo sapiens]
Q68D91	case2-VS-control	-1.20748	0.213081	-5.66675	8	0.00047217	0.00248884	Down	Q68D91	Metallo-beta-lactamase domain-containing protein 2 OS=Homo sapiens OX=9606 GN=MBLAC2 PE=1 SV=3	100	0	Q68D91.3	RecName: Full=Metallo-beta-lactamase domain-containing protein 2
Q86T24	case2-VS-control	-1.19467	0.148084	-8.06749	5	0.000473859	0.0024945	Down	Q86T24	Transcriptional regulator Kaiso OS=Homo sapiens OX=9606 GN=ZBTB33 PE=1 SV=2	100	0	NP_006768.1	transcriptional regulator Kaiso [Homo sapiens]
Q9H9B4	case2-VS-control	0.443782	0.0783675	5.66283	8	0.000474322	0.0024945	None	Q9H9B4	Sideroflexin-1 OS=Homo sapiens OX=9606 GN=SFXN1 PE=1 SV=4	100	0	NP_073591.2	sideroflexin-1 isoform 1 [Homo sapiens]
P30536	case2-VS-control	0.863668	0.152591	5.66001	8	0.000475872	0.00249784	None	P30536	Translocator protein OS=Homo sapiens OX=9606 GN=TSPO PE=1 SV=3	100	2e-117	NP_000705.2	translocator protein [Homo sapiens]
P49591	case2-VS-control	1.84849	0.326605	5.65971	8	0.000476035	0.00249784	Up	P49591	Serine--tRNA ligase, cytoplasmic OS=Homo sapiens OX=9606 GN=SARS PE=1 SV=3	100	0	NP_006504.2	serine--tRNA ligase, cytoplasmic isoform a [Homo sapiens]
P21291	case2-VS-control	-1.59183	0.281565	-5.65349	8	0.00047948	0.00251306	Down	P21291	Cysteine and glycine-rich protein 1 OS=Homo sapiens OX=9606 GN=CSRP1 PE=1 SV=3	100	2e-138	NP_004069.1	cysteine and glycine-rich protein 1 isoform 1 [Homo sapiens]
Q8IWB7	case2-VS-control	-0.728148	0.128866	-5.65043	8	0.000481184	0.00251914	None	Q8IWB7	WD repeat and FYVE domain-containing protein 1 OS=Homo sapiens OX=9606 GN=WDFY1 PE=1 SV=1	100	0	NP_065881.1	WD repeat and FYVE domain-containing protein 1 [Homo sapiens]
Q9BYG5	case2-VS-control	2.7316	0.262593	10.4024	4	0.000482302	0.00252067	Up	Q9BYG5	Partitioning defective 6 homolog beta OS=Homo sapiens OX=9606 GN=PARD6B PE=1 SV=1	100	0	NP_115910.1	partitioning defective 6 homolog beta [Homo sapiens]
Q14814	case2-VS-control	-1.37933	0.244218	-5.64796	8	0.000482566	0.00252067	Down	Q14814	Myocyte-specific enhancer factor 2D OS=Homo sapiens OX=9606 GN=MEF2D PE=1 SV=1	100	0	NP_005911.1	myocyte-specific enhancer factor 2D isoform 1 [Homo sapiens]
P55735	case2-VS-control	-0.45055	0.0798124	-5.64512	8	0.000484156	0.00252612	None	P55735	Protein SEC13 homolog OS=Homo sapiens OX=9606 GN=SEC13 PE=1 SV=3	100	0	NP_899195.1	protein SEC13 homolog isoform 1 [Homo sapiens]
O96008	case2-VS-control	0.577651	0.102418	5.64012	8	0.000486976	0.00253798	None	O96008	Mitochondrial import receptor subunit TOM40 homolog OS=Homo sapiens OX=9606 GN=TOMM40 PE=1 SV=1	100	0	NP_006105.1	mitochondrial import receptor subunit TOM40 homolog [Homo sapiens]
P21333	case2-VS-control	0.662016	0.117519	5.63329	8	0.000490853	0.00255531	None	P21333	Filamin-A OS=Homo sapiens OX=9606 GN=FLNA PE=1 SV=4	100	0	NP_001104026.1	filamin-A isoform 2 [Homo sapiens]
Q86WB0	case2-VS-control	-1.39263	0.247303	-5.63127	8	0.000492006	0.00255843	Down	Q86WB0	Nuclear-interacting partner of ALK OS=Homo sapiens OX=9606 GN=ZC3HC1 PE=1 SV=1	100	0	NP_057562.3	nuclear-interacting partner of ALK isoform 1 [Homo sapiens]
P51159	case2-VS-control	-0.833852	0.148136	-5.62895	8	0.000493332	0.00256245	None	P51159	Ras-related protein Rab-27A OS=Homo sapiens OX=9606 GN=RAB27A PE=1 SV=3	100	1e-165	NP_004571.2	ras-related protein Rab-27A [Homo sapiens]
Q86Y79	case2-VS-control	-0.578358	0.102795	-5.62635	8	0.000494829	0.00256734	None	Q86Y79	Probable peptidyl-tRNA hydrolase OS=Homo sapiens OX=9606 GN=PTRH1 PE=1 SV=1	100	1e-149	NP_001002913.1	probable peptidyl-tRNA hydrolase isoform 1 [Homo sapiens]
P13010	case2-VS-control	0.335718	0.0597767	5.6162	8	0.000500707	0.00259493	None	P13010	X-ray repair cross-complementing protein 5 OS=Homo sapiens OX=9606 GN=XRCC5 PE=1 SV=3	100	0	NP_066964.1	X-ray repair cross-complementing protein 5 [Homo sapiens]
Q13057	case2-VS-control	0.665511	0.11863	5.60996	8	0.000504355	0.00261091	None	Q13057	Bifunctional coenzyme A synthase OS=Homo sapiens OX=9606 GN=COASY PE=1 SV=4	100	0	NP_001035994.1	bifunctional coenzyme A synthase isoform a precursor [Homo sapiens]
P48723	case2-VS-control	-0.749108	0.133736	-5.6014	8	0.000509411	0.00263196	None	P48723	Heat shock 70 kDa protein 13 OS=Homo sapiens OX=9606 GN=HSPA13 PE=1 SV=1	100	0	NP_008879.3	heat shock 70 kDa protein 13 precursor [Homo sapiens]
Q86Y07	case2-VS-control	1.3834	0.246985	5.60115	8	0.000509559	0.00263196	Up	Q86Y07	Serine/threonine-protein kinase VRK2 OS=Homo sapiens OX=9606 GN=VRK2 PE=1 SV=3	99.803	0	BAA19109.1	VRK2 [Homo sapiens]
Q9Y617	case2-VS-control	3.3897	0.605834	5.59509	8	0.000513178	0.0026477	Up	Q9Y617	Phosphoserine aminotransferase OS=Homo sapiens OX=9606 GN=PSAT1 PE=1 SV=2	100	0	NP_478059.1	phosphoserine aminotransferase isoform 1 [Homo sapiens]
O43278	case2-VS-control	1.82	0.177925	10.229	4	0.000514804	0.00265113	Up	O43278	Kunitz-type protease inhibitor 1 OS=Homo sapiens OX=9606 GN=SPINT1 PE=1 SV=2	100	0	NP_857593.1	kunitz-type protease inhibitor 1 isoform 1 precursor [Homo sapiens]
Q9NXH8	case2-VS-control	1.08323	0.17899	6.0519	7	0.000514989	0.00265113	Up	Q9NXH8	Torsin-4A OS=Homo sapiens OX=9606 GN=TOR4A PE=1 SV=2	100	0	NP_060193.2	torsin-4A [Homo sapiens]
P16615	case2-VS-control	0.488782	0.0874693	5.58804	8	0.000517419	0.00265942	None	P16615	Sarcoplasmic/endoplasmic reticulum calcium ATPase 2 OS=Homo sapiens OX=9606 GN=ATP2A2 PE=1 SV=1	100	0	NP_733765.1	sarcoplasmic/endoplasmic reticulum calcium ATPase 2 isoform b [Homo sapiens]
P47897	case2-VS-control	0.536342	0.0959896	5.58749	8	0.000517747	0.00265942	None	P47897	Glutamine--tRNA ligase OS=Homo sapiens OX=9606 GN=QARS PE=1 SV=1	100	0	NP_005042.1	glutamine--tRNA ligase isoform a [Homo sapiens]
P51151	case2-VS-control	-0.544216	0.0975006	-5.58166	8	0.000521286	0.00267462	None	P51151	Ras-related protein Rab-9A OS=Homo sapiens OX=9606 GN=RAB9A PE=1 SV=1	100	1e-150	NP_004242.1	ras-related protein Rab-9A [Homo sapiens]
Q9UI12	case2-VS-control	0.653079	0.117055	5.57927	8	0.000522747	0.00267915	None	Q9UI12	V-type proton ATPase subunit H OS=Homo sapiens OX=9606 GN=ATP6V1H PE=1 SV=1	100	0	NP_998785.1	V-type proton ATPase subunit H isoform 1 [Homo sapiens]
Q8IUH3	case2-VS-control	1.11194	0.199438	5.57538	8	0.00052513	0.00268839	Up	Q8IUH3	RNA-binding protein 45 OS=Homo sapiens OX=9606 GN=RBM45 PE=1 SV=1	100	0	XP_005246344.1	PREDICTED: RNA-binding protein 45 isoform X2 [Homo sapiens]
P20839	case2-VS-control	-1.06843	0.191714	-5.57303	8	0.000526573	0.00269279	Down	P20839	Inosine-5'-monophosphate dehydrogenase 1 OS=Homo sapiens OX=9606 GN=IMPDH1 PE=1 SV=2	100	0	XP_016867661.1	PREDICTED: inosine-5'-monophosphate dehydrogenase 1 isoform X5 [Homo sapiens]
Q92692	case2-VS-control	-0.420918	0.0756363	-5.56502	8	0.000531535	0.00271517	None	Q92692	Nectin-2 OS=Homo sapiens OX=9606 GN=NECTIN2 PE=1 SV=1	100	0	NP_001036189.1	nectin-2 isoform delta precursor [Homo sapiens]
P61803	case2-VS-control	0.525093	0.0943911	5.56295	8	0.000532827	0.00271877	None	P61803	Dolichyl-diphosphooligosaccharide--protein glycosyltransferase subunit DAD1 OS=Homo sapiens OX=9606 GN=DAD1 PE=1 SV=3	100	1e-75	NP_001335.1	dolichyl-diphosphooligosaccharide--protein glycosyltransferase subunit DAD1 [Homo sapiens]
O60512	case2-VS-control	1.0306	0.153795	6.70115	6	0.000536055	0.00273223	Up	O60512	Beta-1,4-galactosyltransferase 3 OS=Homo sapiens OX=9606 GN=B4GALT3 PE=1 SV=2	100	0	NP_003770.1	beta-1,4-galactosyltransferase 3 [Homo sapiens]
Q9NVM9	case2-VS-control	-0.483112	0.0869483	-5.55631	8	0.000536984	0.00273303	None	Q9NVM9	Integrator complex subunit 13 OS=Homo sapiens OX=9606 GN=INTS13 PE=1 SV=2	100	0	NP_060634.2	integrator complex subunit 13 [Homo sapiens]
Q96HE7	case2-VS-control	0.83405	0.150126	5.55566	8	0.000537393	0.00273303	None	Q96HE7	ERO1-like protein alpha OS=Homo sapiens OX=9606 GN=ERO1A PE=1 SV=2	100	0	NP_055399.1	ERO1-like protein alpha precursor [Homo sapiens]
Q15054	case2-VS-control	-0.803929	0.145019	-5.54359	8	0.000545056	0.00276626	None	Q15054	DNA polymerase delta subunit 3 OS=Homo sapiens OX=9606 GN=POLD3 PE=1 SV=2	100	0	NP_006582.1	DNA polymerase delta subunit 3 [Homo sapiens]
Q6UW68	case2-VS-control	0.729389	0.131602	5.54237	8	0.00054584	0.00276626	None	Q6UW68	Transmembrane protein 205 OS=Homo sapiens OX=9606 GN=TMEM205 PE=1 SV=1	100	9e-137	NP_212133.1	transmembrane protein 205 [Homo sapiens]
Q6WCQ1	case2-VS-control	-2.23153	0.372379	-5.99263	7	0.00054626	0.00276626	Down	Q6WCQ1	Myosin phosphatase Rho-interacting protein OS=Homo sapiens OX=9606 GN=MPRIP PE=1 SV=3	100	0	NP_958431.2	myosin phosphatase Rho-interacting protein isoform 2 [Homo sapiens]
O14880	case2-VS-control	1.69431	0.305742	5.54162	8	0.000546319	0.00276626	Up	O14880	Microsomal glutathione S-transferase 3 OS=Homo sapiens OX=9606 GN=MGST3 PE=1 SV=1	100	2e-108	NP_004519.1	microsomal glutathione S-transferase 3 [Homo sapiens]
Q8IU81	case2-VS-control	1.07327	0.193976	5.53297	8	0.000551899	0.00279146	Up	Q8IU81	Interferon regulatory factor 2-binding protein 1 OS=Homo sapiens OX=9606 GN=IRF2BP1 PE=1 SV=1	100	0	NP_056464.1	interferon regulatory factor 2-binding protein 1 [Homo sapiens]
O14981	case2-VS-control	-1.1877	0.214751	-5.53059	8	0.000553443	0.00279622	Down	O14981	TATA-binding protein-associated factor 172 OS=Homo sapiens OX=9606 GN=BTAF1 PE=1 SV=2	99.946	0	XP_018890875.1	PREDICTED: TATA-binding protein-associated factor 172 isoform X1 [Gorilla gorilla gorilla]
P26572	case2-VS-control	0.712716	0.128899	5.52926	8	0.000554314	0.00279756	None	P26572	Alpha-1,3-mannosyl-glycoprotein 2-beta-N-acetylglucosaminyltransferase OS=Homo sapiens OX=9606 GN=MGAT1 PE=1 SV=2	100	0	NP_002397.2	alpha-1,3-mannosyl-glycoprotein 2-beta-N-acetylglucosaminyltransferase [Homo sapiens]
P10619	case2-VS-control	-0.756305	0.136811	-5.5281	8	0.000555067	0.00279831	None	P10619	Lysosomal protective protein OS=Homo sapiens OX=9606 GN=CTSA PE=1 SV=2	100	0	NP_001121167.1	lysosomal protective protein isoform b preproprotein [Homo sapiens]
O95336	case2-VS-control	2.43293	0.407149	5.97552	7	0.000555676	0.00279834	Up	O95336	6-phosphogluconolactonase OS=Homo sapiens OX=9606 GN=PGLS PE=1 SV=2	100	0	NP_036220.1	6-phosphogluconolactonase [Homo sapiens]
Q9NTJ5	case2-VS-control	0.695929	0.125957	5.52515	8	0.000557	0.00280195	None	Q9NTJ5	Phosphatidylinositide phosphatase SAC1 OS=Homo sapiens OX=9606 GN=SACM1L PE=1 SV=2	100	0	NP_054735.3	phosphatidylinositide phosphatase SAC1 isoform 1 [Homo sapiens]
Q9Y676	case2-VS-control	-0.858162	0.155375	-5.52317	8	0.000558294	0.00280541	None	Q9Y676	28S ribosomal protein S18b, mitochondrial OS=Homo sapiens OX=9606 GN=MRPS18B PE=1 SV=1	100	0	NP_054765.1	28S ribosomal protein S18b, mitochondrial [Homo sapiens]
Q15436	case2-VS-control	-0.488889	0.0885667	-5.52001	8	0.000560376	0.00281282	None	Q15436	Protein transport protein Sec23A OS=Homo sapiens OX=9606 GN=SEC23A PE=1 SV=2	100	0	NP_006355.2	protein transport protein Sec23A [Homo sapiens]
Q9Y3D6	case2-VS-control	-0.63344	0.114832	-5.51624	8	0.000562868	0.00282039	None	Q9Y3D6	Mitochondrial fission 1 protein OS=Homo sapiens OX=9606 GN=FIS1 PE=1 SV=2	100	2e-104	NP_057152.2	mitochondrial fission 1 protein [Homo sapiens]
Q8NG31	case2-VS-control	2.27877	0.382199	5.96226	7	0.000563104	0.00282039	Up	Q8NG31	Kinetochore scaffold 1 OS=Homo sapiens OX=9606 GN=KNL1 PE=1 SV=3	100	0	NP_733468.3	kinetochore scaffold 1 isoform 1 [Homo sapiens]
Q9UHK6	case2-VS-control	-0.700958	0.127122	-5.51407	8	0.000564309	0.00282337	None	Q9UHK6	Alpha-methylacyl-CoA racemase OS=Homo sapiens OX=9606 GN=AMACR PE=1 SV=2	100	0	NP_055139.4	alpha-methylacyl-CoA racemase isoform 1 [Homo sapiens]
O43505	case2-VS-control	0.634981	0.115283	5.508	8	0.000568359	0.00284057	None	O43505	Beta-1,4-glucuronyltransferase 1 OS=Homo sapiens OX=9606 GN=B4GAT1 PE=1 SV=1	100	0	NP_006867.1	beta-1,4-glucuronyltransferase 1 [Homo sapiens]
Q5ST30	case2-VS-control	2.57573	0.388963	6.62205	6	0.000571368	0.00285253	Up	Q5ST30	Valine--tRNA ligase, mitochondrial OS=Homo sapiens OX=9606 GN=VARS2 PE=1 SV=2	100	0	NP_065175.4	valine--tRNA ligase, mitochondrial isoform 2 precursor [Homo sapiens]
P55145	case2-VS-control	0.98187	0.178505	5.50053	8	0.000573385	0.00285907	None	P55145	Mesencephalic astrocyte-derived neurotrophic factor OS=Homo sapiens OX=9606 GN=MANF PE=1 SV=3	100	2e-131	P55145.3	RecName: Full=Mesencephalic astrocyte-derived neurotrophic factor; AltName: Full=Arginine-rich protein; AltName: Full=Protein ARMET; Flags: Precursor
Q9BXY0	case2-VS-control	-0.673212	0.122408	-5.49975	8	0.000573914	0.00285907	None	Q9BXY0	Protein MAK16 homolog OS=Homo sapiens OX=9606 GN=MAK16 PE=1 SV=2	100	0	NP_115898.2	protein MAK16 homolog [Homo sapiens]
O15533	case2-VS-control	-1.99668	0.363154	-5.49816	8	0.000574991	0.00286135	Down	O15533	Tapasin OS=Homo sapiens OX=9606 GN=TAPBP PE=1 SV=1	100	0	XP_001170532.1	PREDICTED: tapasin isoform X5 [Pan troglodytes]
Q92542	case2-VS-control	0.501626	0.0912938	5.49463	8	0.000577393	0.00287022	None	Q92542	Nicastrin OS=Homo sapiens OX=9606 GN=NCSTN PE=1 SV=2	100	0	NP_056146.1	nicastrin isoform 1 precursor [Homo sapiens]
Q9NR30	case2-VS-control	-0.424292	0.0772481	-5.49258	8	0.000578789	0.00287407	None	Q9NR30	Nucleolar RNA helicase 2 OS=Homo sapiens OX=9606 GN=DDX21 PE=1 SV=5	100	0	NP_004719.2	nucleolar RNA helicase 2 isoform 1 [Homo sapiens]
Q9UMX0	case2-VS-control	-0.694783	0.126575	-5.4891	8	0.000581171	0.00288281	None	Q9UMX0	Ubiquilin-1 OS=Homo sapiens OX=9606 GN=UBQLN1 PE=1 SV=2	100	0	NP_038466.2	ubiquilin-1 isoform 1 [Homo sapiens]
Q6P1A2	case2-VS-control	0.438157	0.079863	5.48636	8	0.000583059	0.00288747	None	Q6P1A2	Lysophospholipid acyltransferase 5 OS=Homo sapiens OX=9606 GN=LPCAT3 PE=1 SV=1	100	0	NP_005759.4	lysophospholipid acyltransferase 5 [Homo sapiens]
P00973	case2-VS-control	4.27366	0.553798	7.717	5	0.000583359	0.00288747	Up	P00973	2'-5'-oligoadenylate synthase 1 OS=Homo sapiens OX=9606 GN=OAS1 PE=1 SV=4	100	0	NP_058132.2	2'-5'-oligoadenylate synthase 1 isoform 1 [Homo sapiens]
Q9Y2Z2	case2-VS-control	1.59858	0.291657	5.48103	8	0.000586745	0.00290113	Up	Q9Y2Z2	Protein MTO1 homolog, mitochondrial OS=Homo sapiens OX=9606 GN=MTO1 PE=1 SV=2	100	0	NP_598400.1	protein MTO1 homolog, mitochondrial isoform b [Homo sapiens]
O94919	case2-VS-control	1.79484	0.23311	7.69956	5	0.00058955	0.00291188	Up	O94919	Endonuclease domain-containing 1 protein OS=Homo sapiens OX=9606 GN=ENDOD1 PE=1 SV=2	100	0	NP_055851.1	endonuclease domain-containing 1 protein precursor [Homo sapiens]
P61586	case2-VS-control	-0.907957	0.165954	-5.47112	8	0.000593658	0.00292877	None	P61586	Transforming protein RhoA OS=Homo sapiens OX=9606 GN=RHOA PE=1 SV=1	99.482	2e-142	ERE75472.1	transforming protein RhoA-like protein [Cricetulus griseus]
P35658	case2-VS-control	-0.548516	0.100272	-5.4703	8	0.000594234	0.00292877	None	P35658	Nuclear pore complex protein Nup214 OS=Homo sapiens OX=9606 GN=NUP214 PE=1 SV=2	100	0	NP_005076.3	nuclear pore complex protein Nup214 isoform 2 [Homo sapiens]
P04156	case2-VS-control	-1.61844	0.2467	-6.56035	6	0.000600773	0.00295505	Down	P04156	Major prion protein OS=Homo sapiens OX=9606 GN=PRNP PE=1 SV=1	100	0	NP_000302.1	major prion protein isoform Prp preproprotein [Homo sapiens]
Q9H7B4	case2-VS-control	1.84743	0.338297	5.46097	8	0.000600843	0.00295505	Up	Q9H7B4	Histone-lysine N-methyltransferase SMYD3 OS=Homo sapiens OX=9606 GN=SMYD3 PE=1 SV=4	100	0	NP_001161212.1	histone-lysine N-methyltransferase SMYD3 isoform 1 [Homo sapiens]
A1L3X0	case2-VS-control	2.22127	0.226395	9.81151	4	0.000604944	0.00296899	Up	A1L3X0	Elongation of very long chain fatty acids protein 7 OS=Homo sapiens OX=9606 GN=ELOVL7 PE=1 SV=1	100	0	NP_079206.2	elongation of very long chain fatty acids protein 7 isoform 1 [Homo sapiens]
O95674	case2-VS-control	1.03377	0.135008	7.65708	5	0.000604961	0.00296899	Up	O95674	Phosphatidate cytidylyltransferase 2 OS=Homo sapiens OX=9606 GN=CDS2 PE=1 SV=1	100	0	NP_003809.1	phosphatidate cytidylyltransferase 2 [Homo sapiens]
Q658P3	case2-VS-control	0.762934	0.13989	5.4538	8	0.000605968	0.00297078	None	Q658P3	Metalloreductase STEAP3 OS=Homo sapiens OX=9606 GN=STEAP3 PE=1 SV=2	100	0	NP_001008410.1	metalloreductase STEAP3 isoform b [Homo sapiens]
Q9H845	case2-VS-control	-0.570846	0.104827	-5.4456	8	0.000611896	0.00299667	None	Q9H845	Acyl-CoA dehydrogenase family member 9, mitochondrial OS=Homo sapiens OX=9606 GN=ACAD9 PE=1 SV=1	100	0	NP_054768.2	acyl-CoA dehydrogenase family member 9, mitochondrial [Homo sapiens]
Q9UEW8	case2-VS-control	1.48135	0.272632	5.4335	8	0.000620749	0.00303681	Up	Q9UEW8	STE20/SPS1-related proline-alanine-rich protein kinase OS=Homo sapiens OX=9606 GN=STK39 PE=1 SV=3	100	0	NP_037365.2	STE20/SPS1-related proline-alanine-rich protein kinase [Homo sapiens]
Q86YS7	case2-VS-control	-0.536711	0.099338	-5.40288	8	0.000643801	0.00314627	None	Q86YS7	C2 domain-containing protein 5 OS=Homo sapiens OX=9606 GN=C2CD5 PE=1 SV=1	100	0	NP_055617.1	C2 domain-containing protein 5 isoform e [Homo sapiens]
Q9NQW7	case2-VS-control	2.66415	0.493749	5.39575	8	0.000649301	0.00316766	Up	Q9NQW7	Xaa-Pro aminopeptidase 1 OS=Homo sapiens OX=9606 GN=XPNPEP1 PE=1 SV=3	100	0	NP_001311065.1	xaa-Pro aminopeptidase 1 isoform 9 [Homo sapiens]
P68036	case2-VS-control	2.65935	0.492948	5.39479	8	0.000650048	0.00316766	Up	P68036	Ubiquitin-conjugating enzyme E2 L3 OS=Homo sapiens OX=9606 GN=UBE2L3 PE=1 SV=1	100	2e-111	NP_003338.1	ubiquitin-conjugating enzyme E2 L3 isoform 1 [Homo sapiens]
P18124	case2-VS-control	0.645648	0.119698	5.39398	8	0.000650675	0.00316766	None	P18124	60S ribosomal protein L7 OS=Homo sapiens OX=9606 GN=RPL7 PE=1 SV=1	100	8e-180	NP_000962.2	60S ribosomal protein L7 [Homo sapiens]
Q6PK18	case2-VS-control	-2.01324	0.311516	-6.46273	6	0.000650917	0.00316766	Down	Q6PK18	2-oxoglutarate and iron-dependent oxygenase domain-containing protein 3 OS=Homo sapiens OX=9606 GN=OGFOD3 PE=1 SV=2	100	0	NP_078924.1	2-oxoglutarate and iron-dependent oxygenase domain-containing protein 3 isoform 1 [Homo sapiens]
Q13620	case2-VS-control	-1.35393	0.251366	-5.38628	8	0.000656692	0.00318958	Down	Q13620	Cullin-4B OS=Homo sapiens OX=9606 GN=CUL4B PE=1 SV=4	100	0	NP_003579.3	cullin-4B isoform 1 [Homo sapiens]
O94955	case2-VS-control	-1.72061	0.266684	-6.45184	6	0.000656801	0.00318958	Down	O94955	Rho-related BTB domain-containing protein 3 OS=Homo sapiens OX=9606 GN=RHOBTB3 PE=1 SV=2	100	0	NP_055714.3	rho-related BTB domain-containing protein 3 [Homo sapiens]
Q99615	case2-VS-control	-1.68212	0.312482	-5.38309	8	0.000659195	0.00319785	Down	Q99615	DnaJ homolog subfamily C member 7 OS=Homo sapiens OX=9606 GN=DNAJC7 PE=1 SV=2	100	0	NP_003306.3	dnaJ homolog subfamily C member 7 isoform 1 [Homo sapiens]
Q14142	case2-VS-control	-1.01074	0.188006	-5.37612	8	0.000664714	0.00322125	Down	Q14142	Tripartite motif-containing protein 14 OS=Homo sapiens OX=9606 GN=TRIM14 PE=1 SV=2	100	0	NP_055603.2	tripartite motif-containing protein 14 [Homo sapiens]
Q5VT40	case2-VS-control	-1.44082	0.249088	-5.78436	7	0.000674237	0.00325802	Down	Q5VT40	Protein FAM78B OS=Homo sapiens OX=9606 GN=FAM78B PE=2 SV=1	100	0	NP_780670.2	protein FAM78B [Mus musculus]
Q5M775	case2-VS-control	-1.46252	0.195511	-7.48054	5	0.000674349	0.00325802	Down	Q5M775	Cytospin-B OS=Homo sapiens OX=9606 GN=SPECC1 PE=1 SV=1	100	0	NP_001028725.1	cytospin-B isoform 1 [Homo sapiens]
P02671	case2-VS-control	0.641614	0.119614	5.36402	8	0.000674414	0.00325802	None	P02671	Fibrinogen alpha chain OS=Homo sapiens OX=9606 GN=FGA PE=1 SV=2	100	0	NP_000499.1	fibrinogen alpha chain isoform alpha-E preproprotein [Homo sapiens]
P52756	case2-VS-control	1.02659	0.191478	5.36138	8	0.000676557	0.00326497	Up	P52756	RNA-binding protein 5 OS=Homo sapiens OX=9606 GN=RBM5 PE=1 SV=2	100	0	NP_005769.1	RNA-binding protein 5 [Homo sapiens]
Q99538	case2-VS-control	3.59631	0.377698	9.52165	4	0.000679239	0.0032745	Up	Q99538	Legumain OS=Homo sapiens OX=9606 GN=LGMN PE=1 SV=1	100	0	NP_005597.3	legumain preproprotein [Homo sapiens]
P40429	case2-VS-control	0.695234	0.129807	5.35592	8	0.000680999	0.00327956	None	P40429	60S ribosomal protein L13a OS=Homo sapiens OX=9606 GN=RPL13A PE=1 SV=2	100	3e-145	NP_036555.1	60S ribosomal protein L13a isoform 1 [Homo sapiens]
P82930	case2-VS-control	-0.815088	0.152258	-5.35334	8	0.00068311	0.00328631	None	P82930	28S ribosomal protein S34, mitochondrial OS=Homo sapiens OX=9606 GN=MRPS34 PE=1 SV=2	100	1e-158	NP_076425.1	28S ribosomal protein S34, mitochondrial isoform 2 [Homo sapiens]
Q9H1B7	case2-VS-control	-0.769193	0.143726	-5.35178	8	0.000684383	0.00328902	None	Q9H1B7	Interferon regulatory factor 2-binding protein-like OS=Homo sapiens OX=9606 GN=IRF2BPL PE=1 SV=1	100	0	NP_078772.1	interferon regulatory factor 2-binding protein-like [Homo sapiens]
Q9BSG0	case2-VS-control	-1.08061	0.187538	-5.76208	7	0.000689808	0.00331165	Down	Q9BSG0	Protease-associated domain-containing protein 1 OS=Homo sapiens OX=9606 GN=PRADC1 PE=1 SV=1	100	4e-139	XP_005575653.2	PREDICTED: protease-associated domain-containing protein 1 [Macaca fascicularis]
O15155	case2-VS-control	-0.488553	0.0914597	-5.34173	8	0.000692698	0.00332126	None	O15155	BET1 homolog OS=Homo sapiens OX=9606 GN=BET1 PE=1 SV=1	100	3e-82	NP_005859.1	BET1 homolog isoform 1 [Homo sapiens]
P07355	case2-VS-control	0.449574	0.084173	5.34107	8	0.000693244	0.00332126	None	P07355	Annexin A2 OS=Homo sapiens OX=9606 GN=ANXA2 PE=1 SV=2	100	0	NP_004030.1	annexin A2 isoform 2 [Homo sapiens]
Q6PCB0	case2-VS-control	3.54627	0.0935619	37.9029	2	0.000695346	0.00332788	Up	Q6PCB0	von Willebrand factor A domain-containing protein 1 OS=Homo sapiens OX=9606 GN=VWA1 PE=1 SV=1	100	0	NP_073745.2	von Willebrand factor A domain-containing protein 1 isoform 1 precursor [Homo sapiens]
Q8NEY8	case2-VS-control	1.51829	0.204396	7.42818	5	0.000696713	0.00333098	Up	Q8NEY8	Periphilin-1 OS=Homo sapiens OX=9606 GN=PPHLN1 PE=1 SV=2	100	0	NP_057572.5	periphilin-1 isoform 1 [Homo sapiens]
Q9UP95	case2-VS-control	0.41073	0.0770109	5.3334	8	0.000699661	0.00334162	None	Q9UP95	Solute carrier family 12 member 4 OS=Homo sapiens OX=9606 GN=SLC12A4 PE=1 SV=2	100	0	NP_005063.1	solute carrier family 12 member 4 isoform a [Homo sapiens]
Q9Y2L9	case2-VS-control	1.79708	0.312869	5.74389	7	0.000702815	0.00335282	Up	Q9Y2L9	Leucine-rich repeat and calponin homology domain-containing protein 1 OS=Homo sapiens OX=9606 GN=LRCH1 PE=1 SV=3	100	0	Q9Y2L9.3	RecName: Full=Leucine-rich repeat and calponin homology domain-containing protein 1; AltName: Full=Calponin homology domain-containing protein 1; AltName: Full=Neuronal protein 81; Short=NP81
O43286	case2-VS-control	1.6167	0.303382	5.32891	8	0.000703455	0.00335282	Up	O43286	Beta-1,4-galactosyltransferase 5 OS=Homo sapiens OX=9606 GN=B4GALT5 PE=2 SV=1	100	0	NP_004767.1	beta-1,4-galactosyltransferase 5 [Homo sapiens]
Q10567	case2-VS-control	0.710883	0.133446	5.32712	8	0.000704972	0.00335659	None	Q10567	AP-1 complex subunit beta-1 OS=Homo sapiens OX=9606 GN=AP1B1 PE=1 SV=2	100	0	Q10567.2	RecName: Full=AP-1 complex subunit beta-1; AltName: Full=Adaptor protein complex AP-1 subunit beta-1; AltName: Full=Adaptor-related protein complex 1 subunit beta-1; AltName: Full=Beta-1-adaptin; AltName: Full=Beta-adaptin 1; AltName: Full=Clathrin assembly protein complex 1 beta large chain; AltName: Full=Golgi adaptor HA1/AP1 adaptin beta subunit
Q99848	case2-VS-control	-0.855538	0.160647	-5.32556	8	0.000706292	0.00335942	None	Q99848	Probable rRNA-processing protein EBP2 OS=Homo sapiens OX=9606 GN=EBNA1BP2 PE=1 SV=2	100	0	NP_006815.2	probable rRNA-processing protein EBP2 isoform 2 [Homo sapiens]
Q00325	case2-VS-control	0.558627	0.105025	5.31901	8	0.000711885	0.00338255	None	Q00325	Phosphate carrier protein, mitochondrial OS=Homo sapiens OX=9606 GN=SLC25A3 PE=1 SV=2	100	0	NP_005879.1	phosphate carrier protein, mitochondrial isoform a precursor [Homo sapiens]
A2RRP1	case2-VS-control	0.48316	0.0909238	5.3139	8	0.000716278	0.00339993	None	A2RRP1	Neuroblastoma-amplified sequence OS=Homo sapiens OX=9606 GN=NBAS PE=1 SV=2	100	0	NP_056993.2	neuroblastoma-amplified sequence [Homo sapiens]
Q9NZJ6	case2-VS-control	-1.26377	0.238202	-5.30544	8	0.00072362	0.00343126	Down	Q9NZJ6	Ubiquinone biosynthesis O-methyltransferase, mitochondrial OS=Homo sapiens OX=9606 GN=COQ3 PE=1 SV=3	100	0	NP_059117.3	ubiquinone biosynthesis O-methyltransferase, mitochondrial [Homo sapiens]
P46776	case2-VS-control	0.625482	0.118021	5.29976	8	0.000728598	0.00344599	None	P46776	60S ribosomal protein L27a OS=Homo sapiens OX=9606 GN=RPL27A PE=1 SV=2	100	2e-104	NP_000981.1	60S ribosomal protein L27a [Homo sapiens]
Q4G0N4	case2-VS-control	-0.680015	0.128318	-5.29944	8	0.000728878	0.00344599	None	Q4G0N4	NAD kinase 2, mitochondrial OS=Homo sapiens OX=9606 GN=NADK2 PE=1 SV=2	100	0	NP_001078880.1	NAD kinase 2, mitochondrial isoform 1 [Homo sapiens]
Q8NHP6	case2-VS-control	-0.642137	0.12118	-5.29904	8	0.000729232	0.00344599	None	Q8NHP6	Motile sperm domain-containing protein 2 OS=Homo sapiens OX=9606 GN=MOSPD2 PE=1 SV=1	100	0	NP_689794.1	motile sperm domain-containing protein 2 isoform 1 [Homo sapiens]
Q92643	case2-VS-control	-0.472971	0.0892651	-5.29851	8	0.000729704	0.00344599	None	Q92643	GPI-anchor transamidase OS=Homo sapiens OX=9606 GN=PIGK PE=1 SV=2	100	0	NP_005473.1	GPI-anchor transamidase precursor [Homo sapiens]
O43447	case2-VS-control	-0.349061	0.0658914	-5.29752	8	0.000730569	0.00344656	None	O43447	Peptidyl-prolyl cis-trans isomerase H OS=Homo sapiens OX=9606 GN=PPIH PE=1 SV=1	100	2e-128	XP_017397257.1	PREDICTED: peptidyl-prolyl cis-trans isomerase H [Cebus capucinus imitator]
Q8N163	case2-VS-control	0.689108	0.130169	5.29395	8	0.000733729	0.00345794	None	Q8N163	Cell cycle and apoptosis regulator protein 2 OS=Homo sapiens OX=9606 GN=CCAR2 PE=1 SV=2	100	0	NP_066997.3	cell cycle and apoptosis regulator protein 2 [Homo sapiens]
P21281	case2-VS-control	0.558954	0.105659	5.29015	8	0.000737107	0.00347033	None	P21281	V-type proton ATPase subunit B, brain isoform OS=Homo sapiens OX=9606 GN=ATP6V1B2 PE=1 SV=3	100	0	NP_001684.2	V-type proton ATPase subunit B, brain isoform [Homo sapiens]
Q92805	case2-VS-control	-1.20179	0.163955	-7.33	5	0.000741067	0.00348543	Down	Q92805	Golgin subfamily A member 1 OS=Homo sapiens OX=9606 GN=GOLGA1 PE=1 SV=3	100	0	XP_005251986.1	PREDICTED: golgin subfamily A member 1 isoform X1 [Homo sapiens]
Q9Y314	case2-VS-control	1.14092	0.216142	5.27856	8	0.000747509	0.00351215	Up	Q9Y314	Nitric oxide synthase-interacting protein OS=Homo sapiens OX=9606 GN=NOSIP PE=1 SV=1	100	0	NP_057037.1	nitric oxide synthase-interacting protein [Homo sapiens]
Q8NCH0	case2-VS-control	-1.04062	0.197215	-5.27658	8	0.000749302	0.00351701	Down	Q8NCH0	Carbohydrate sulfotransferase 14 OS=Homo sapiens OX=9606 GN=CHST14 PE=1 SV=2	100	0	NP_569735.1	carbohydrate sulfotransferase 14 [Homo sapiens]
P09429	case2-VS-control	1.05042	0.199219	5.2727	8	0.000752826	0.00352997	Up	P09429	High mobility group protein B1 OS=Homo sapiens OX=9606 GN=HMGB1 PE=1 SV=3	100	3e-149	NP_002119.1	high mobility group protein B1 [Homo sapiens]
P19634	case2-VS-control	1.30768	0.141142	9.26503	4	0.000754687	0.00353482	Up	P19634	Sodium/hydrogen exchanger 1 OS=Homo sapiens OX=9606 GN=SLC9A1 PE=1 SV=2	100	0	NP_003038.2	sodium/hydrogen exchanger 1 [Homo sapiens]
Q96N66	case2-VS-control	0.810126	0.153727	5.2699	8	0.000755388	0.00353482	None	Q96N66	Lysophospholipid acyltransferase 7 OS=Homo sapiens OX=9606 GN=MBOAT7 PE=1 SV=2	100	0	NP_077274.3	lysophospholipid acyltransferase 7 isoform 1 [Homo sapiens]
P14373	case2-VS-control	-0.995021	0.189083	-5.26235	8	0.000762331	0.0035637	None	P14373	Zinc finger protein RFP OS=Homo sapiens OX=9606 GN=TRIM27 PE=1 SV=1	100	0	NP_006501.1	zinc finger protein RFP [Homo sapiens]
P35237	case2-VS-control	2.33614	0.444364	5.25727	8	0.000767037	0.00358209	Up	P35237	Serpin B6 OS=Homo sapiens OX=9606 GN=SERPINB6 PE=1 SV=3	100	0	NP_001182220.2	serpin B6 isoform b [Homo sapiens]
Q9HC07	case2-VS-control	0.827858	0.157496	5.25638	8	0.000767863	0.00358233	None	Q9HC07	Transmembrane protein 165 OS=Homo sapiens OX=9606 GN=TMEM165 PE=1 SV=1	100	0	NP_060945.2	transmembrane protein 165 precursor [Homo sapiens]
Q9HC35	case2-VS-control	1.50507	0.286649	5.25057	8	0.000773297	0.00360365	Up	Q9HC35	Echinoderm microtubule-associated protein-like 4 OS=Homo sapiens OX=9606 GN=EML4 PE=1 SV=3	99.898	0	EAX00324.1	echinoderm microtubule associated protein like 4 [Homo sapiens]
Q9BUF5	case2-VS-control	-1.3946	0.265646	-5.24983	8	0.000773991	0.00360365	Down	Q9BUF5	Tubulin beta-6 chain OS=Homo sapiens OX=9606 GN=TUBB6 PE=1 SV=1	100	0	NP_115914.1	tubulin beta-6 chain isoform 1 [Homo sapiens]
Q8IX01	case2-VS-control	-1.96763	0.314704	-6.2523	6	0.000776222	0.00360996	Down	Q8IX01	SURP and G-patch domain-containing protein 2 OS=Homo sapiens OX=9606 GN=SUGP2 PE=1 SV=2	100	0	NP_001308627.1	SURP and G-patch domain-containing protein 2 isoform 2 [Homo sapiens]
Q9NUQ6	case2-VS-control	0.797202	0.151965	5.24596	8	0.000777638	0.00360996	None	Q9NUQ6	SPATS2-like protein OS=Homo sapiens OX=9606 GN=SPATS2L PE=1 SV=2	100	0	BAG61258.1	unnamed protein product [Homo sapiens]
Q6NVY1	case2-VS-control	-0.862262	0.164368	-5.24591	8	0.000777685	0.00360996	None	Q6NVY1	3-hydroxyisobutyryl-CoA hydrolase, mitochondrial OS=Homo sapiens OX=9606 GN=HIBCH PE=1 SV=2	100	0	NP_055177.2	3-hydroxyisobutyryl-CoA hydrolase, mitochondrial isoform 1 precursor [Homo sapiens]
P62318	case2-VS-control	-0.33564	0.0640406	-5.24104	8	0.000782301	0.0036273	None	P62318	Small nuclear ribonucleoprotein Sm D3 OS=Homo sapiens OX=9606 GN=SNRPD3 PE=1 SV=1	100	2e-88	XP_011953486.2	PREDICTED: small nuclear ribonucleoprotein Sm D3 isoform X1 [Ovis aries]
Q9H444	case2-VS-control	1.08873	0.207761	5.24032	8	0.00078299	0.0036273	Up	Q9H444	Charged multivesicular body protein 4b OS=Homo sapiens OX=9606 GN=CHMP4B PE=1 SV=1	100	5e-160	NP_789782.1	charged multivesicular body protein 4b [Homo sapiens]
P36871	case2-VS-control	3.28983	0.629269	5.22803	8	0.000794781	0.00367824	Up	P36871	Phosphoglucomutase-1 OS=Homo sapiens OX=9606 GN=PGM1 PE=1 SV=3	100	0	NP_002624.2	phosphoglucomutase-1 isoform 1 [Homo sapiens]
Q9P013	case2-VS-control	-0.897125	0.171721	-5.22432	8	0.000798376	0.00369119	None	Q9P013	Spliceosome-associated protein CWC15 homolog OS=Homo sapiens OX=9606 GN=CWC15 PE=1 SV=2	100	2e-166	NP_057487.2	spliceosome-associated protein CWC15 homolog [Homo sapiens]
Q9BYC5	case2-VS-control	2.2544	0.24721	9.11939	4	0.000802142	0.0037049	Up	Q9BYC5	Alpha-(1,6)-fucosyltransferase OS=Homo sapiens OX=9606 GN=FUT8 PE=1 SV=2	100	0	NP_835368.1	alpha-(1,6)-fucosyltransferase isoform a [Homo sapiens]
P04183	case2-VS-control	-1.03772	0.198983	-5.21513	8	0.000807358	0.00372528	Down	P04183	Thymidine kinase, cytosolic OS=Homo sapiens OX=9606 GN=TK1 PE=1 SV=2	100	5e-173	NP_003249.3	thymidine kinase, cytosolic isoform 1 [Homo sapiens]
Q9NYZ1	case2-VS-control	-0.727691	0.139598	-5.21278	8	0.000809681	0.00373227	None	Q9NYZ1	Golgi apparatus membrane protein TVP23 homolog B OS=Homo sapiens OX=9606 GN=TVP23B PE=1 SV=2	100	3e-151	NP_057162.4	Golgi apparatus membrane protein TVP23 homolog B isoform a [Homo sapiens]
O75054	case2-VS-control	-1.62522	0.312077	-5.20776	8	0.000814652	0.00375145	Down	O75054	Immunoglobulin superfamily member 3 OS=Homo sapiens OX=9606 GN=IGSF3 PE=2 SV=3	100	0	NP_001007238.1	immunoglobulin superfamily member 3 isoform 2 precursor [Homo sapiens]
P55058	case2-VS-control	0.587892	0.0647862	9.07434	4	0.000817566	0.00376113	None	P55058	Phospholipid transfer protein OS=Homo sapiens OX=9606 GN=PLTP PE=1 SV=1	100	0	NP_006218.1	phospholipid transfer protein isoform a precursor [Homo sapiens]
Q9BQB6	case2-VS-control	-0.930997	0.178927	-5.20323	8	0.000819166	0.00376474	None	Q9BQB6	Vitamin K epoxide reductase complex subunit 1 OS=Homo sapiens OX=9606 GN=VKORC1 PE=1 SV=1	100	2e-114	NP_076869.1	vitamin K epoxide reductase complex subunit 1 isoform 1 precursor [Homo sapiens]
Q96AA3	case2-VS-control	0.634897	0.122064	5.20133	8	0.000821063	0.00376972	None	Q96AA3	Protein RFT1 homolog OS=Homo sapiens OX=9606 GN=RFT1 PE=1 SV=1	100	0	NP_443091.1	protein RFT1 homolog [Homo sapiens]
Q8WTW3	case2-VS-control	0.528976	0.0946633	5.58797	7	0.000826291	0.00378996	None	Q8WTW3	Conserved oligomeric Golgi complex subunit 1 OS=Homo sapiens OX=9606 GN=COG1 PE=1 SV=1	100	0	NP_061184.1	conserved oligomeric Golgi complex subunit 1 [Homo sapiens]
P35240	case2-VS-control	-2.42224	0.392216	-6.17578	6	0.00082849	0.00379629	Down	P35240	Merlin OS=Homo sapiens OX=9606 GN=NF2 PE=1 SV=1	99.832	0	XP_016794411.1	PREDICTED: merlin isoform X1 [Pan troglodytes]
Q9BSH5	case2-VS-control	0.991043	0.190857	5.1926	8	0.000829866	0.00379883	None	Q9BSH5	Haloacid dehalogenase-like hydrolase domain-containing protein 3 OS=Homo sapiens OX=9606 GN=HDHD3 PE=1 SV=1	100	0	NP_112496.1	haloacid dehalogenase-like hydrolase domain-containing protein 3 [Homo sapiens]
Q8N5A5	case2-VS-control	1.4886	0.286872	5.18907	8	0.000833462	0.00380906	Up	Q8N5A5	Zinc finger CCCH-type with G patch domain-containing protein OS=Homo sapiens OX=9606 GN=ZGPAT PE=1 SV=3	100	0	NP_115916.3	zinc finger CCCH-type with G patch domain-containing protein isoform a [Homo sapiens]
Q99798	case2-VS-control	-0.834807	0.160887	-5.18879	8	0.000833747	0.00380906	None	Q99798	Aconitate hydratase, mitochondrial OS=Homo sapiens OX=9606 GN=ACO2 PE=1 SV=2	100	0	NP_001089.1	aconitate hydratase, mitochondrial precursor [Homo sapiens]
P07814	case2-VS-control	0.913777	0.176492	5.17743	8	0.00084541	0.00385838	None	P07814	Bifunctional glutamate/proline--tRNA ligase OS=Homo sapiens OX=9606 GN=EPRS PE=1 SV=5	100	0	NP_004437.2	bifunctional glutamate/proline--tRNA ligase [Homo sapiens]
P62906	case2-VS-control	0.701149	0.135444	5.17666	8	0.00084621	0.00385838	None	P62906	60S ribosomal protein L10a OS=Homo sapiens OX=9606 GN=RPL10A PE=1 SV=2	100	4e-159	NP_112327.1	60S ribosomal protein L10a [Rattus norvegicus]
Q9P1F3	case2-VS-control	2.87358	0.555259	5.1752	8	0.00084772	0.00386147	Up	Q9P1F3	Costars family protein ABRACL OS=Homo sapiens OX=9606 GN=ABRACL PE=1 SV=1	100	5e-52	XP_018884209.1	PREDICTED: costars family protein ABRACL isoform X1 [Gorilla gorilla gorilla]
Q8NFH5	case2-VS-control	0.667793	0.129118	5.17197	8	0.000851081	0.00387296	None	Q8NFH5	Nucleoporin NUP35 OS=Homo sapiens OX=9606 GN=NUP35 PE=1 SV=1	100	0	NP_612142.2	nucleoporin NUP53 isoform a [Homo sapiens]
O75976	case2-VS-control	0.618979	0.119706	5.17083	8	0.000852274	0.00387458	None	O75976	Carboxypeptidase D OS=Homo sapiens OX=9606 GN=CPD PE=1 SV=2	100	0	NP_001295.2	carboxypeptidase D isoform 1 precursor [Homo sapiens]
P82675	case2-VS-control	-0.905192	0.175088	-5.16994	8	0.000853199	0.00387498	None	P82675	28S ribosomal protein S5, mitochondrial OS=Homo sapiens OX=9606 GN=MRPS5 PE=1 SV=2	100	0	NP_114108.1	28S ribosomal protein S5, mitochondrial isoform a [Homo sapiens]
Q03426	case2-VS-control	-1.59799	0.260383	-6.13708	6	0.000856444	0.00388281	Down	Q03426	Mevalonate kinase OS=Homo sapiens OX=9606 GN=MVK PE=1 SV=1	100	0	NP_000422.1	mevalonate kinase isoform a [Homo sapiens]
Q86UA1	case2-VS-control	-2.11345	0.297507	-7.10387	5	0.000856601	0.00388281	Down	Q86UA1	Pre-mRNA-processing factor 39 OS=Homo sapiens OX=9606 GN=PRPF39 PE=1 SV=3	100	0	NP_060392.3	pre-mRNA-processing factor 39 [Homo sapiens]
Q9BQG2	case2-VS-control	1.24991	0.203885	6.13046	6	0.000861333	0.00390044	Up	Q9BQG2	Peroxisomal NADH pyrophosphatase NUDT12 OS=Homo sapiens OX=9606 GN=NUDT12 PE=1 SV=1	100	0	NP_113626.1	peroxisomal NADH pyrophosphatase NUDT12 isoform 1 [Homo sapiens]
O95249	case2-VS-control	1.54418	0.299366	5.15815	8	0.000865619	0.00391018	Up	O95249	Golgi SNAP receptor complex member 1 OS=Homo sapiens OX=9606 GN=GOSR1 PE=1 SV=1	100	0	NP_004862.1	Golgi SNAP receptor complex member 1 isoform 1 [Homo sapiens]
Q9BQ39	case2-VS-control	-0.739399	0.143372	-5.15721	8	0.000866615	0.00391018	None	Q9BQ39	ATP-dependent RNA helicase DDX50 OS=Homo sapiens OX=9606 GN=DDX50 PE=1 SV=1	100	0	NP_076950.1	ATP-dependent RNA helicase DDX50 [Homo sapiens]
P42356	case2-VS-control	-0.898639	0.162153	-5.54191	7	0.000867272	0.00391018	None	P42356	Phosphatidylinositol 4-kinase alpha OS=Homo sapiens OX=9606 GN=PI4KA PE=1 SV=4	100	0	NP_477352.3	phosphatidylinositol 4-kinase alpha [Homo sapiens]
P54136	case2-VS-control	0.600698	0.116496	5.15638	8	0.0008675	0.00391018	None	P54136	Arginine--tRNA ligase, cytoplasmic OS=Homo sapiens OX=9606 GN=RARS PE=1 SV=2	100	0	NP_002878.2	arginine--tRNA ligase, cytoplasmic [Homo sapiens]
Q9BTX1	case2-VS-control	1.11196	0.215656	5.15619	8	0.000867709	0.00391018	Up	Q9BTX1	Nucleoporin NDC1 OS=Homo sapiens OX=9606 GN=NDC1 PE=1 SV=2	100	0	NP_060557.3	nucleoporin NDC1 isoform 1 [Homo sapiens]
P06213	case2-VS-control	0.890086	0.172724	5.15323	8	0.000870863	0.00391893	None	P06213	Insulin receptor OS=Homo sapiens OX=9606 GN=INSR PE=1 SV=4	100	0	NP_000199.2	insulin receptor isoform Long preproprotein [Homo sapiens]
P83881	case2-VS-control	1.2028	0.233427	5.15278	8	0.000871343	0.00391893	Up	P83881;Q969Q0	60S ribosomal protein L36a OS=Homo sapiens OX=9606 GN=RPL36A PE=1 SV=2	100	9e-72	XP_006210332.1	PREDICTED: 60S ribosomal protein L36a [Vicugna pacos]
Q9H9P8	case2-VS-control	-0.676167	0.122138	-5.53608	7	0.000872616	0.00392084	None	Q9H9P8	L-2-hydroxyglutarate dehydrogenase, mitochondrial OS=Homo sapiens OX=9606 GN=L2HGDH PE=1 SV=3	100	0	NP_079160.1	L-2-hydroxyglutarate dehydrogenase, mitochondrial precursor [Homo sapiens]
P07384	case2-VS-control	2.46997	0.47977	5.14823	8	0.000876227	0.00393325	Up	P07384	Calpain-1 catalytic subunit OS=Homo sapiens OX=9606 GN=CAPN1 PE=1 SV=1	100	0	NP_005177.2	calpain-1 catalytic subunit [Homo sapiens]
O15320	case2-VS-control	2.61689	0.508843	5.14283	8	0.000882061	0.00395356	Up	O15320;Q96PC5	Endoplasmic reticulum export factor CTAGE5 OS=Homo sapiens OX=9606 GN=CTAGE5 PE=1 SV=4	100	0	NP_005921.2	cTAGE family member 5 isoform 1 [Homo sapiens]
Q9P0U4	case2-VS-control	-0.877749	0.170687	-5.14246	8	0.00088246	0.00395356	None	Q9P0U4	CXXC-type zinc finger protein 1 OS=Homo sapiens OX=9606 GN=CXXC1 PE=1 SV=2	100	0	NP_055408.2	CXXC-type zinc finger protein 1 isoform 2 [Homo sapiens]
Q92930	case2-VS-control	-0.594437	0.115651	-5.13991	8	0.000885231	0.00395977	None	Q92930	Ras-related protein Rab-8B OS=Homo sapiens OX=9606 GN=RAB8B PE=1 SV=2	100	4e-151	XP_009427575.2	PREDICTED: ras-related protein Rab-8B isoform X1 [Pan troglodytes]
P14406	case2-VS-control	0.532981	0.103701	5.13961	8	0.000885558	0.00395977	None	P14406	Cytochrome c oxidase subunit 7A2, mitochondrial OS=Homo sapiens OX=9606 GN=COX7A2 PE=1 SV=1	100	1e-54	NP_001856.2	cytochrome c oxidase subunit 7A2, mitochondrial precursor [Homo sapiens]
Q8N5G2	case2-VS-control	0.519549	0.101107	5.13859	8	0.000886671	0.00396092	None	Q8N5G2	Macoilin OS=Homo sapiens OX=9606 GN=MACO1 PE=1 SV=1	100	0	EAX07878.1	transmembrane protein 57, isoform CRA_c [Homo sapiens]
Q9NUI1	case2-VS-control	0.833484	0.162378	5.133	8	0.00089279	0.00398441	None	Q9NUI1	Peroxisomal 2,4-dienoyl-CoA reductase OS=Homo sapiens OX=9606 GN=DECR2 PE=1 SV=1	100	0	NP_065715.1	peroxisomal 2,4-dienoyl-CoA reductase [Homo sapiens]
Q96KC8	case2-VS-control	1.75246	0.249085	7.03558	5	0.000895595	0.00399308	Up	Q96KC8	DnaJ homolog subfamily C member 1 OS=Homo sapiens OX=9606 GN=DNAJC1 PE=1 SV=1	100	0	NP_071760.2	dnaJ homolog subfamily C member 1 precursor [Homo sapiens]
Q06787	case2-VS-control	-0.806746	0.15735	-5.12707	8	0.00089932	0.00400583	None	Q06787	Synaptic functional regulator FMR1 OS=Homo sapiens OX=9606 GN=FMR1 PE=1 SV=1	100	0	NP_002015.1	synaptic functional regulator FMR1 isoform ISO1 [Homo sapiens]
Q9BXW9	case2-VS-control	-0.984046	0.191977	-5.12585	8	0.000900682	0.00400803	None	Q9BXW9	Fanconi anemia group D2 protein OS=Homo sapiens OX=9606 GN=FANCD2 PE=1 SV=2	100	0	NP_001018125.1	Fanconi anemia group D2 protein isoform b [Homo sapiens]
Q2NL82	case2-VS-control	1.47737	0.288373	5.12311	8	0.000903721	0.00401529	Up	Q2NL82	Pre-rRNA-processing protein TSR1 homolog OS=Homo sapiens OX=9606 GN=TSR1 PE=1 SV=1	100	0	NP_060598.3	pre-rRNA-processing protein TSR1 homolog [Homo sapiens]
P49189	case2-VS-control	0.768728	0.15006	5.12282	8	0.000904047	0.00401529	None	P49189	4-trimethylaminobutyraldehyde dehydrogenase OS=Homo sapiens OX=9606 GN=ALDH9A1 PE=1 SV=3	100	0	NP_000687.3	4-trimethylaminobutyraldehyde dehydrogenase [Homo sapiens]
P09668	case2-VS-control	1.5425	0.175008	8.81392	4	0.000914314	0.00405699	Up	P09668	Pro-cathepsin H OS=Homo sapiens OX=9606 GN=CTSH PE=1 SV=4	100	0	NP_004381.2	pro-cathepsin H isoform a preproprotein [Homo sapiens]
P11310	case2-VS-control	0.709041	0.139037	5.09967	8	0.000930229	0.0041202	None	P11310	Medium-chain specific acyl-CoA dehydrogenase, mitochondrial OS=Homo sapiens OX=9606 GN=ACADM PE=1 SV=1	100	0	NP_000007.1	medium-chain specific acyl-CoA dehydrogenase, mitochondrial isoform a precursor [Homo sapiens]
Q9BRP4	case2-VS-control	1.99237	0.0608128	32.7624	2	0.00093034	0.0041202	Up	Q9BRP4	Proteasomal ATPase-associated factor 1 OS=Homo sapiens OX=9606 GN=PAAF1 PE=1 SV=2	100	0	NP_079431.1	proteasomal ATPase-associated factor 1 isoform 2 [Homo sapiens]
P39019	case2-VS-control	1.17295	0.230214	5.09504	8	0.000935567	0.00413939	Up	P39019	40S ribosomal protein S19 OS=Homo sapiens OX=9606 GN=RPS19 PE=1 SV=2	100	2e-103	XP_014406408.1	PREDICTED: 40S ribosomal protein S19 isoform X1 [Camelus ferus]
Q96SY0	case2-VS-control	-0.602646	0.118367	-5.09132	8	0.000939878	0.00415449	None	Q96SY0	Integrator complex subunit 14 OS=Homo sapiens OX=9606 GN=INTS14 PE=1 SV=2	100	0	XP_001174547.2	PREDICTED: von Willebrand factor A domain-containing protein 9 isoform X1 [Pan troglodytes]
Q9NY93	case2-VS-control	0.717091	0.141004	5.08563	8	0.000946518	0.00417787	None	Q9NY93	Probable ATP-dependent RNA helicase DDX56 OS=Homo sapiens OX=9606 GN=DDX56 PE=1 SV=1	100	0	NP_061955.1	probable ATP-dependent RNA helicase DDX56 isoform 1 [Homo sapiens]
Q9NVX2	case2-VS-control	0.564314	0.110989	5.08442	8	0.000947926	0.00417787	None	Q9NVX2	Notchless protein homolog 1 OS=Homo sapiens OX=9606 GN=NLE1 PE=1 SV=4	100	0	NP_060566.2	notchless protein homolog 1 isoform a [Homo sapiens]
P09525	case2-VS-control	3.07792	0.605399	5.08412	8	0.000948282	0.00417787	Up	P09525	Annexin A4 OS=Homo sapiens OX=9606 GN=ANXA4 PE=1 SV=4	100	0	NP_001144.1	annexin A4 isoform a [Homo sapiens]
Q16537	case2-VS-control	1.26374	0.248622	5.08297	8	0.000949639	0.00417787	Up	Q16537	Serine/threonine-protein phosphatase 2A 56 kDa regulatory subunit epsilon isoform OS=Homo sapiens OX=9606 GN=PPP2R5E PE=1 SV=1	100	0	XP_017663037.1	PREDICTED: serine/threonine-protein phosphatase 2A 56 kDa regulatory subunit epsilon isoform isoform X2 [Lepidothrix coronata]
P50570	case2-VS-control	-0.760183	0.149556	-5.08293	8	0.00094968	0.00417787	None	P50570	Dynamin-2 OS=Homo sapiens OX=9606 GN=DNM2 PE=1 SV=2	100	0	NP_001005360.1	dynamin-2 isoform 1 [Homo sapiens]
Q9Y232	case2-VS-control	-1.25175	0.246565	-5.07674	8	0.000956983	0.00420474	Down	Q9Y232	Chromodomain Y-like protein OS=Homo sapiens OX=9606 GN=CDYL PE=1 SV=2	100	0	Q9Y232.2	RecName: Full=Chromodomain Y-like protein; Short=CDY-like
Q99643	case2-VS-control	-0.632097	0.124521	-5.07622	8	0.000957605	0.00420474	None	Q99643	Succinate dehydrogenase cytochrome b560 subunit, mitochondrial OS=Homo sapiens OX=9606 GN=SDHC PE=1 SV=1	100	1e-120	NP_002992.1	succinate dehydrogenase cytochrome b560 subunit, mitochondrial isoform 1 precursor [Homo sapiens]
P30414	case2-VS-control	-1.33276	0.222172	-5.99878	6	0.000965562	0.00423566	Down	P30414	NK-tumor recognition protein OS=Homo sapiens OX=9606 GN=NKTR PE=1 SV=2	100	0	NP_005376.2	NK-tumor recognition protein isoform a [Homo sapiens]
Q6P4A7	case2-VS-control	1.25386	0.181273	6.917	5	0.000968424	0.00424419	Up	Q6P4A7	Sideroflexin-4 OS=Homo sapiens OX=9606 GN=SFXN4 PE=1 SV=1	100	0	NP_998814.1	sideroflexin-4 [Homo sapiens]
O75477	case2-VS-control	-1.04387	0.206148	-5.06367	8	0.000972609	0.0042585	Down	O75477	Erlin-1 OS=Homo sapiens OX=9606 GN=ERLIN1 PE=1 SV=1	100	0	O75477.1	RecName: Full=Erlin-1; AltName: Full=Endoplasmic reticulum lipid raft-associated protein 1; AltName: Full=Protein KE04; AltName: Full=Stomatin-prohibitin-flotillin-HflC/K domain-containing protein 1; Short=SPFH domain-containing protein 1
Q6DD88	case2-VS-control	0.503582	0.099525	5.05986	8	0.000977223	0.00427466	None	Q6DD88	Atlastin-3 OS=Homo sapiens OX=9606 GN=ATL3 PE=1 SV=1	100	0	NP_056274.3	atlastin-3 isoform 1 [Homo sapiens]
Q8N3V7	case2-VS-control	-1.29076	0.255156	-5.05872	8	0.000978603	0.00427665	Down	Q8N3V7	Synaptopodin OS=Homo sapiens OX=9606 GN=SYNPO PE=1 SV=2	100	0	NP_001159680.1	synaptopodin isoform C [Homo sapiens]
Q9BRD0	case2-VS-control	-0.403515	0.0798243	-5.05504	8	0.000983079	0.00429216	None	Q9BRD0	BUD13 homolog OS=Homo sapiens OX=9606 GN=BUD13 PE=1 SV=1	100	0	NP_116114.1	BUD13 homolog isoform 1 [Homo sapiens]
Q9NZJ9	case2-VS-control	5.27903	0.406574	12.9842	3	0.000986346	0.00429924	Up	Q9NZJ9	Diphosphoinositol polyphosphate phosphohydrolase 2 OS=Homo sapiens OX=9606 GN=NUDT4 PE=1 SV=2	100	9e-133	NP_061967.3	diphosphoinositol polyphosphate phosphohydrolase 2 isoform alpha [Homo sapiens]
Q8IXK2	case2-VS-control	3.27559	0.252294	12.9832	3	0.000986559	0.00429924	Up	Q8IXK2	Polypeptide N-acetylgalactosaminyltransferase 12 OS=Homo sapiens OX=9606 GN=GALNT12 PE=1 SV=3	100	0	NP_078918.3	polypeptide N-acetylgalactosaminyltransferase 12 [Homo sapiens]
O43402	case2-VS-control	0.458581	0.0908816	5.04592	8	0.000994284	0.00432883	None	O43402	ER membrane protein complex subunit 8 OS=Homo sapiens OX=9606 GN=EMC8 PE=1 SV=1	100	6e-158	NP_006058.1	ER membrane protein complex subunit 8 isoform 1 [Homo sapiens]
O14646	case2-VS-control	-2.28689	0.422702	-5.41016	7	0.000997568	0.00433904	Down	O14646	Chromodomain-helicase-DNA-binding protein 1 OS=Homo sapiens OX=9606 GN=CHD1 PE=1 SV=2	100	0	NP_001261.2	chromodomain-helicase-DNA-binding protein 1 [Homo sapiens]
Q6PJF5	case2-VS-control	-0.890029	0.149373	-5.95842	6	0.00100035	0.00434706	None	Q6PJF5	Inactive rhomboid protein 2 OS=Homo sapiens OX=9606 GN=RHBDF2 PE=1 SV=2	100	0	NP_078875.4	inactive rhomboid protein 2 isoform 1 [Homo sapiens]
Q14156	case2-VS-control	-1.2138	0.240846	-5.03975	8	0.00100193	0.00434986	Down	Q14156	Protein EFR3 homolog A OS=Homo sapiens OX=9606 GN=EFR3A PE=1 SV=2	100	0	NP_055952.2	protein EFR3 homolog A isoform 1 [Homo sapiens]
Q96KN1	case2-VS-control	-1.06074	0.154794	-6.85263	5	0.00101089	0.00438162	Down	Q96KN1	Protein FAM84B OS=Homo sapiens OX=9606 GN=FAM84B PE=1 SV=1	100	0	NP_777571.1	protein FAM84B [Homo sapiens]
P50897	case2-VS-control	-0.655356	0.130227	-5.0324	8	0.00101114	0.00438162	None	P50897	Palmitoyl-protein thioesterase 1 OS=Homo sapiens OX=9606 GN=PPT1 PE=1 SV=1	100	0	NP_000301.1	palmitoyl-protein thioesterase 1 isoform 1 precursor [Homo sapiens]
P08582	case2-VS-control	-2.01288	0.234641	-8.57855	4	0.00101424	0.00439094	Down	P08582	Melanotransferrin OS=Homo sapiens OX=9606 GN=MELTF PE=1 SV=2	100	0	NP_005920.2	melanotransferrin isoform 1 preproprotein [Homo sapiens]
Q9Y3D3	case2-VS-control	-0.590222	0.117465	-5.02467	8	0.00102092	0.00441571	None	Q9Y3D3	28S ribosomal protein S16, mitochondrial OS=Homo sapiens OX=9606 GN=MRPS16 PE=1 SV=1	100	4e-98	NP_057149.1	28S ribosomal protein S16, mitochondrial [Homo sapiens]
O75509	case2-VS-control	2.63798	0.0844845	31.2244	2	0.0010241	0.00442535	Up	O75509	Tumor necrosis factor receptor superfamily member 21 OS=Homo sapiens OX=9606 GN=TNFRSF21 PE=1 SV=1	100	0	NP_055267.1	tumor necrosis factor receptor superfamily member 21 precursor [Homo sapiens]
A1L0T0	case2-VS-control	-0.550456	0.109658	-5.01976	8	0.00102718	0.00443452	None	A1L0T0	Acetolactate synthase-like protein OS=Homo sapiens OX=9606 GN=ILVBL PE=1 SV=2	100	0	NP_006835.2	acetolactate synthase-like protein [Homo sapiens]
Q96BR5	case2-VS-control	-0.642687	0.128052	-5.01897	8	0.0010282	0.00443477	None	Q96BR5	Cytochrome c oxidase assembly factor 7 OS=Homo sapiens OX=9606 GN=COA7 PE=1 SV=2	100	3e-172	NP_075565.2	cytochrome c oxidase assembly factor 7 [Homo sapiens]
O75525	case2-VS-control	0.558208	0.111386	5.01149	8	0.00103783	0.00447212	None	O75525;Q07666;Q5VWX1	KH domain-containing, RNA-binding, signal transduction-associated protein 3 OS=Homo sapiens OX=9606 GN=KHDRBS3 PE=1 SV=1	100	0	NP_006549.1	KH domain-containing, RNA-binding, signal transduction-associated protein 3 [Homo sapiens]
Q8NBJ4	case2-VS-control	0.851647	0.170198	5.00387	8	0.00104775	0.00450467	None	Q8NBJ4	Golgi membrane protein 1 OS=Homo sapiens OX=9606 GN=GOLM1 PE=1 SV=1	100	0	NP_057632.2	Golgi membrane protein 1 [Homo sapiens]
Q9Y5K6	case2-VS-control	1.72758	0.345256	5.00377	8	0.00104788	0.00450467	Up	Q9Y5K6	CD2-associated protein OS=Homo sapiens OX=9606 GN=CD2AP PE=1 SV=1	100	0	NP_036252.1	CD2-associated protein [Homo sapiens]
Q9NYY8	case2-VS-control	-0.463413	0.0926188	-5.00345	8	0.0010483	0.00450467	None	Q9NYY8	FAST kinase domain-containing protein 2, mitochondrial OS=Homo sapiens OX=9606 GN=FASTKD2 PE=1 SV=1	100	0	NP_055744.2	FAST kinase domain-containing protein 2, mitochondrial [Homo sapiens]
Q96S52	case2-VS-control	-0.577335	0.115526	-4.99743	8	0.00105621	0.00453445	None	Q96S52	GPI transamidase component PIG-S OS=Homo sapiens OX=9606 GN=PIGS PE=1 SV=3	100	0	NP_149975.1	GPI transamidase component PIG-S [Homo sapiens]
P09884	case2-VS-control	-1.20708	0.241598	-4.99624	8	0.00105778	0.00453499	Down	P09884	DNA polymerase alpha catalytic subunit OS=Homo sapiens OX=9606 GN=POLA1 PE=1 SV=2	100	0	NP_058633.2	DNA polymerase alpha catalytic subunit isoform 2 [Homo sapiens]
O60701	case2-VS-control	2.49575	0.499565	4.99585	8	0.0010583	0.00453499	Up	O60701	UDP-glucose 6-dehydrogenase OS=Homo sapiens OX=9606 GN=UGDH PE=1 SV=1	100	0	XP_005262724.1	PREDICTED: UDP-glucose 6-dehydrogenase isoform X1 [Homo sapiens]
Q5T1V6	case2-VS-control	1.19912	0.240071	4.99486	8	0.00105961	0.00453644	Up	Q5T1V6	Probable ATP-dependent RNA helicase DDX59 OS=Homo sapiens OX=9606 GN=DDX59 PE=1 SV=1	100	0	NP_001026895.2	probable ATP-dependent RNA helicase DDX59 isoform 1 [Homo sapiens]
Q6P1N9	case2-VS-control	-1.24244	0.18328	-6.77892	5	0.00106224	0.00454349	Down	Q6P1N9	Putative deoxyribonuclease TATDN1 OS=Homo sapiens OX=9606 GN=TATDN1 PE=1 SV=2	100	0	NP_114415.1	putative deoxyribonuclease TATDN1 isoform a [Homo sapiens]
P22392	case2-VS-control	1.36398	0.273767	4.98225	8	0.00107646	0.00460003	Up	P22392	Nucleoside diphosphate kinase B OS=Homo sapiens OX=9606 GN=NME2 PE=1 SV=1	100	2e-110	NP_002503.1	nucleoside diphosphate kinase B isoform a [Homo sapiens]
Q15102	case2-VS-control	2.65181	0.532387	4.98098	8	0.00107817	0.00460312	Up	Q15102	Platelet-activating factor acetylhydrolase IB subunit gamma OS=Homo sapiens OX=9606 GN=PAFAH1B3 PE=1 SV=1	100	2e-169	NP_002564.1	platelet-activating factor acetylhydrolase IB subunit gamma [Homo sapiens]
Q9BQP7	case2-VS-control	1.08463	0.21789	4.97785	8	0.0010824	0.00461689	Up	Q9BQP7	Mitochondrial genome maintenance exonuclease 1 OS=Homo sapiens OX=9606 GN=MGME1 PE=1 SV=1	100	0	NP_443097.1	mitochondrial genome maintenance exonuclease 1 isoform 2 precursor [Homo sapiens]
O43824	case2-VS-control	1.20353	0.22569	5.33266	7	0.00108432	0.00462084	Up	O43824	Putative GTP-binding protein 6 OS=Homo sapiens OX=9606 GN=GTPBP6 PE=2 SV=4	100	0	NP_036359.3	putative GTP-binding protein 6 [Homo sapiens]
Q32MZ4	case2-VS-control	1.04869	0.210776	4.97538	8	0.00108576	0.00462272	Up	Q32MZ4	Leucine-rich repeat flightless-interacting protein 1 OS=Homo sapiens OX=9606 GN=LRRFIP1 PE=1 SV=2	100	0	NP_001131024.1	leucine-rich repeat flightless-interacting protein 1 isoform 3 [Homo sapiens]
Q9H6F5	case2-VS-control	0.842445	0.169414	4.97271	8	0.00108939	0.00463391	None	Q9H6F5	Coiled-coil domain-containing protein 86 OS=Homo sapiens OX=9606 GN=CCDC86 PE=1 SV=1	100	0	NP_077003.1	coiled-coil domain-containing protein 86 [Homo sapiens]
Q96EY1	case2-VS-control	-0.541024	0.108826	-4.97145	8	0.00109112	0.00463701	None	Q96EY1	DnaJ homolog subfamily A member 3, mitochondrial OS=Homo sapiens OX=9606 GN=DNAJA3 PE=1 SV=2	100	0	NP_005138.3	dnaJ homolog subfamily A member 3, mitochondrial isoform 1 [Homo sapiens]
O60934	case2-VS-control	-0.72161	0.145215	-4.96925	8	0.00109412	0.00464551	None	O60934	Nibrin OS=Homo sapiens OX=9606 GN=NBN PE=1 SV=1	100	0	NP_002476.2	nibrin isoform 1 [Homo sapiens]
Q96EK6	case2-VS-control	0.712903	0.143521	4.96723	8	0.00109691	0.0046506	None	Q96EK6	Glucosamine 6-phosphate N-acetyltransferase OS=Homo sapiens OX=9606 GN=GNPNAT1 PE=1 SV=1	100	2e-135	NP_932332.1	glucosamine 6-phosphate N-acetyltransferase [Homo sapiens]
P31937	case2-VS-control	-0.806859	0.162447	-4.96692	8	0.00109733	0.0046506	None	P31937	3-hydroxyisobutyrate dehydrogenase, mitochondrial OS=Homo sapiens OX=9606 GN=HIBADH PE=1 SV=2	100	0	NP_689953.1	3-hydroxyisobutyrate dehydrogenase, mitochondrial precursor [Homo sapiens]
P30154	case2-VS-control	-0.9864	0.18543	-5.31953	7	0.00109983	0.00465691	None	P30154	Serine/threonine-protein phosphatase 2A 65 kDa regulatory subunit A beta isoform OS=Homo sapiens OX=9606 GN=PPP2R1B PE=1 SV=3	100	0	NP_002707.3	serine/threonine-protein phosphatase 2A 65 kDa regulatory subunit A beta isoform isoform a [Homo sapiens]
Q9NPA8	case2-VS-control	-0.421919	0.0849923	-4.9642	8	0.00110108	0.00465794	None	Q9NPA8	Transcription and mRNA export factor ENY2 OS=Homo sapiens OX=9606 GN=ENY2 PE=1 SV=1	100	5e-67	NP_064574.1	transcription and mRNA export factor ENY2 isoform 1 [Homo sapiens]
Q9HAV7	case2-VS-control	-0.833618	0.167965	-4.96305	8	0.00110267	0.0046604	None	Q9HAV7	GrpE protein homolog 1, mitochondrial OS=Homo sapiens OX=9606 GN=GRPEL1 PE=1 SV=2	100	2e-156	NP_079472.1	grpE protein homolog 1, mitochondrial precursor [Homo sapiens]
Q02880	case2-VS-control	0.946514	0.162026	5.84175	6	0.00110924	0.00468389	None	Q02880	DNA topoisomerase 2-beta OS=Homo sapiens OX=9606 GN=TOP2B PE=1 SV=3	100	0	NP_001317629.1	DNA topoisomerase 2-beta isoform 1 [Homo sapiens]
P50213	case2-VS-control	-0.837469	0.16897	-4.95632	8	0.00111202	0.00468724	None	P50213	Isocitrate dehydrogenase [NAD] subunit alpha, mitochondrial OS=Homo sapiens OX=9606 GN=IDH3A PE=1 SV=1	100	0	NP_005521.1	isocitrate dehydrogenase [NAD] subunit alpha, mitochondrial precursor [Homo sapiens]
Q9H0L4	case2-VS-control	1.67308	0.199783	8.37447	4	0.00111206	0.00468724	Up	Q9H0L4	Cleavage stimulation factor subunit 2 tau variant OS=Homo sapiens OX=9606 GN=CSTF2T PE=1 SV=1	100	0	NP_056050.1	cleavage stimulation factor subunit 2 tau variant [Homo sapiens]
Q969E2	case2-VS-control	-0.501087	0.101125	-4.95513	8	0.00111369	0.00468986	None	Q969E2	Secretory carrier-associated membrane protein 4 OS=Homo sapiens OX=9606 GN=SCAMP4 PE=1 SV=1	100	7e-168	NP_524558.1	secretory carrier-associated membrane protein 4 isoform 1 [Homo sapiens]
O60443	case2-VS-control	1.40932	0.241542	5.83467	6	0.00111626	0.00469642	Up	O60443	Gasdermin-E OS=Homo sapiens OX=9606 GN=GSDME PE=1 SV=2	100	0	NP_004394.1	non-syndromic hearing impairment protein 5 isoform a [Homo sapiens]
O94925	case2-VS-control	-0.711366	0.143703	-4.95024	8	0.00112054	0.00471014	None	O94925	Glutaminase kidney isoform, mitochondrial OS=Homo sapiens OX=9606 GN=GLS PE=1 SV=1	100	0	NP_055720.3	glutaminase kidney isoform, mitochondrial isoform 1 precursor [Homo sapiens]
P62847	case2-VS-control	1.196	0.241698	4.94833	8	0.00112324	0.00471722	Up	P62847	40S ribosomal protein S24 OS=Homo sapiens OX=9606 GN=RPS24 PE=1 SV=1	100	3e-92	NP_001017.1	40S ribosomal protein S24 isoform c [Homo sapiens]
Q5XKE5	case2-VS-control	0.505803	0.102248	4.9468	8	0.0011254	0.00471903	None	Q5XKE5	Keratin, type II cytoskeletal 79 OS=Homo sapiens OX=9606 GN=KRT79 PE=1 SV=2	100	0	NP_787028.1	keratin, type II cytoskeletal 79 [Homo sapiens]
Q13232	case2-VS-control	0.90872	0.183707	4.94658	8	0.00112572	0.00471903	None	Q13232	Nucleoside diphosphate kinase 3 OS=Homo sapiens OX=9606 GN=NME3 PE=1 SV=2	100	1e-121	NP_002504.2	nucleoside diphosphate kinase 3 precursor [Homo sapiens]
Q9BVX2	case2-VS-control	-0.742339	0.15019	-4.94266	8	0.00113127	0.00473619	None	Q9BVX2	Transmembrane protein 106C OS=Homo sapiens OX=9606 GN=TMEM106C PE=1 SV=1	100	0	NP_076961.1	transmembrane protein 106C isoform a [Homo sapiens]
Q6PGP7	case2-VS-control	0.982599	0.185639	5.29307	7	0.00113185	0.00473619	None	Q6PGP7	Tetratricopeptide repeat protein 37 OS=Homo sapiens OX=9606 GN=TTC37 PE=1 SV=1	100	0	NP_055454.1	tetratricopeptide repeat protein 37 [Homo sapiens]
Q13404	case2-VS-control	1.17008	0.23699	4.93724	8	0.00113901	0.00476182	Up	Q13404	Ubiquitin-conjugating enzyme E2 variant 1 OS=Homo sapiens OX=9606 GN=UBE2V1 PE=1 SV=2	100	2e-105	NP_001027459.1	ubiquitin-conjugating enzyme E2 variant 1 isoform d [Homo sapiens]
Q9ULH0	case2-VS-control	0.759104	0.15378	4.9363	8	0.00114036	0.00476316	None	Q9ULH0	Kinase D-interacting substrate of 220 kDa OS=Homo sapiens OX=9606 GN=KIDINS220 PE=1 SV=3	100	0	NP_065789.1	kinase D-interacting substrate of 220 kDa isoform 1 [Homo sapiens]
Q9Y530	case2-VS-control	1.08125	0.219099	4.935	8	0.00114222	0.00476327	Up	Q9Y530	O-acetyl-ADP-ribose deacetylase 1 OS=Homo sapiens OX=9606 GN=OARD1 PE=1 SV=2	100	7e-111	NP_659500.1	O-acetyl-ADP-ribose deacetylase 1 isoform a [Homo sapiens]
Q8N9N7	case2-VS-control	-0.498974	0.101112	-4.93485	8	0.00114244	0.00476327	None	Q8N9N7	Leucine-rich repeat-containing protein 57 OS=Homo sapiens OX=9606 GN=LRRC57 PE=1 SV=1	100	6e-170	NP_694992.2	leucine-rich repeat-containing protein 57 [Homo sapiens]
Q14554	case2-VS-control	0.421896	0.0856927	4.92336	8	0.0011591	0.00482563	None	Q14554	Protein disulfide-isomerase A5 OS=Homo sapiens OX=9606 GN=PDIA5 PE=1 SV=1	100	0	NP_006801.1	protein disulfide-isomerase A5 precursor [Homo sapiens]
Q9ULJ3	case2-VS-control	-0.876151	0.177983	-4.92267	8	0.00116011	0.00482563	None	Q9ULJ3	Zinc finger and BTB domain-containing protein 21 OS=Homo sapiens OX=9606 GN=ZBTB21 PE=1 SV=2	100	0	NP_065778.3	zinc finger and BTB domain-containing protein 21 isoform L [Homo sapiens]
O95168	case2-VS-control	0.36404	0.0739635	4.92189	8	0.00116124	0.00482563	None	O95168	NADH dehydrogenase [ubiquinone] 1 beta subcomplex subunit 4 OS=Homo sapiens OX=9606 GN=NDUFB4 PE=1 SV=3	100	4e-90	NP_004538.2	NADH dehydrogenase [ubiquinone] 1 beta subcomplex subunit 4 isoform 1 [Homo sapiens]
Q9NX62	case2-VS-control	0.603267	0.122574	4.92167	8	0.00116157	0.00482563	None	Q9NX62	Inositol monophosphatase 3 OS=Homo sapiens OX=9606 GN=IMPAD1 PE=1 SV=1	100	0	NP_060283.3	inositol monophosphatase 3 [Homo sapiens]
Q9UNP9	case2-VS-control	-0.567838	0.115412	-4.9201	8	0.00116387	0.00483083	None	Q9UNP9	Peptidyl-prolyl cis-trans isomerase E OS=Homo sapiens OX=9606 GN=PPIE PE=1 SV=1	100	0	NP_006103.1	peptidyl-prolyl cis-trans isomerase E isoform 1 [Homo sapiens]
O75152	case2-VS-control	-1.04992	0.213493	-4.91781	8	0.00116723	0.00484044	Down	O75152	Zinc finger CCCH domain-containing protein 11A OS=Homo sapiens OX=9606 GN=ZC3H11A PE=1 SV=3	100	0	NP_055642.3	zinc finger CCCH domain-containing protein 11A isoform 1 [Homo sapiens]
Q96S55	case2-VS-control	0.872092	0.165698	5.26314	7	0.00116933	0.00484482	None	Q96S55	ATPase WRNIP1 OS=Homo sapiens OX=9606 GN=WRNIP1 PE=1 SV=2	100	0	NP_064520.2	ATPase WRNIP1 isoform 1 [Homo sapiens]
Q14966	case2-VS-control	-0.604015	0.122938	-4.91317	8	0.00117408	0.00486013	None	Q14966	Zinc finger protein 638 OS=Homo sapiens OX=9606 GN=ZNF638 PE=1 SV=2	100	0	NP_055312.2	zinc finger protein 638 isoform 1 [Homo sapiens]
Q9HAN9	case2-VS-control	-1.08326	0.220594	-4.91067	8	0.00117779	0.00487114	Down	Q9HAN9	Nicotinamide/nicotinic acid mononucleotide adenylyltransferase 1 OS=Homo sapiens OX=9606 GN=NMNAT1 PE=1 SV=1	100	0	NP_073624.2	nicotinamide/nicotinic acid mononucleotide adenylyltransferase 1 isoform 1 [Homo sapiens]
Q9Y6K0	case2-VS-control	0.705764	0.143875	4.9054	8	0.00118565	0.00489801	None	Q9Y6K0	Choline/ethanolaminephosphotransferase 1 OS=Homo sapiens OX=9606 GN=CEPT1 PE=1 SV=1	100	0	XP_007975793.1	PREDICTED: choline/ethanolaminephosphotransferase 1 isoform X1 [Chlorocebus sabaeus]
Q14517	case2-VS-control	1.50605	0.123476	12.1971	3	0.00118655	0.00489801	Up	Q14517	Protocadherin Fat 1 OS=Homo sapiens OX=9606 GN=FAT1 PE=1 SV=2	100	0	NP_005236.2	protocadherin Fat 1 precursor [Homo sapiens]
Q96LD4	case2-VS-control	2.07225	0.394804	5.24882	7	0.00118776	0.00489801	Up	Q96LD4	E3 ubiquitin-protein ligase TRIM47 OS=Homo sapiens OX=9606 GN=TRIM47 PE=1 SV=2	100	0	NP_258411.2	tripartite motif-containing protein 47 [Homo sapiens]
Q9BWH2	case2-VS-control	1.3807	0.208745	6.61428	5	0.00118852	0.00489801	Up	Q9BWH2	FUN14 domain-containing protein 2 OS=Homo sapiens OX=9606 GN=FUNDC2 PE=1 SV=2	100	6e-137	NP_076423.2	FUN14 domain-containing protein 2 [Homo sapiens]
Q13217	case2-VS-control	0.467382	0.0954629	4.89595	8	0.0011999	0.0049405	None	Q13217	DnaJ homolog subfamily C member 3 OS=Homo sapiens OX=9606 GN=DNAJC3 PE=1 SV=1	100	0	NP_006251.1	dnaJ homolog subfamily C member 3 precursor [Homo sapiens]
Q8WUF5	case2-VS-control	1.88475	0.385361	4.89086	8	0.00120765	0.00496799	Up	Q8WUF5	RelA-associated inhibitor OS=Homo sapiens OX=9606 GN=PPP1R13L PE=1 SV=4	100	0	NP_006654.2	relA-associated inhibitor [Homo sapiens]
Q96KA5	case2-VS-control	-1.17083	0.239695	-4.88466	8	0.00121715	0.00500265	Down	Q96KA5	Cleft lip and palate transmembrane protein 1-like protein OS=Homo sapiens OX=9606 GN=CLPTM1L PE=1 SV=1	100	0	NP_110409.2	cleft lip and palate transmembrane protein 1-like protein [Homo sapiens]
O95573	case2-VS-control	0.343467	0.0703557	4.88187	8	0.00122146	0.00501422	None	O95573	Long-chain-fatty-acid--CoA ligase 3 OS=Homo sapiens OX=9606 GN=ACSL3 PE=1 SV=3	100	0	NP_004448.2	long-chain-fatty-acid--CoA ligase 3 [Homo sapiens]
Q15293	case2-VS-control	-0.463727	0.0949982	-4.88144	8	0.00122214	0.00501422	None	Q15293	Reticulocalbin-1 OS=Homo sapiens OX=9606 GN=RCN1 PE=1 SV=1	100	0	NP_002892.1	reticulocalbin-1 precursor [Homo sapiens]
Q9P0I2	case2-VS-control	0.577863	0.118544	4.87468	8	0.00123264	0.00505285	None	Q9P0I2	ER membrane protein complex subunit 3 OS=Homo sapiens OX=9606 GN=EMC3 PE=1 SV=3	100	0	XP_019506662.1	PREDICTED: ER membrane protein complex subunit 3 [Hipposideros armiger]
Q8NDD1	case2-VS-control	2.26434	0.464655	4.87317	8	0.00123499	0.00505801	Up	Q8NDD1	Uncharacterized protein C1orf131 OS=Homo sapiens OX=9606 GN=C1orf131 PE=1 SV=4	100	0	NP_689592.2	uncharacterized protein C1orf131 isoform a [Homo sapiens]
Q96C57	case2-VS-control	1.04013	0.213536	4.871	8	0.0012384	0.00506749	Up	Q96C57	Protein CUSTOS OS=Homo sapiens OX=9606 GN=CUSTOS PE=1 SV=2	100	0	NP_075046.1	uncharacterized protein C12orf43 isoform c [Homo sapiens]
Q4G176	case2-VS-control	0.587936	0.120763	4.86851	8	0.00124232	0.00507902	None	Q4G176	Acyl-CoA synthetase family member 3, mitochondrial OS=Homo sapiens OX=9606 GN=ACSF3 PE=1 SV=3	100	0	NP_777577.2	acyl-CoA synthetase family member 3, mitochondrial isoform 1 precursor [Homo sapiens]
P05187	case2-VS-control	-1.35805	0.237656	-5.71438	6	0.00124387	0.00508089	Down	P05187	Alkaline phosphatase, placental type OS=Homo sapiens OX=9606 GN=ALPP PE=1 SV=2	100	0	NP_001623.3	alkaline phosphatase, placental type preproprotein [Homo sapiens]
O00203	case2-VS-control	1.50751	0.310092	4.86149	8	0.00125343	0.00511542	Up	O00203	AP-3 complex subunit beta-1 OS=Homo sapiens OX=9606 GN=AP3B1 PE=1 SV=3	100	0	NP_003655.3	AP-3 complex subunit beta-1 isoform 1 [Homo sapiens]
Q96IG2	case2-VS-control	-2.85457	0.500386	-5.70474	6	0.0012548	0.00511651	Down	Q96IG2	F-box/LRR-repeat protein 20 OS=Homo sapiens OX=9606 GN=FBXL20 PE=1 SV=2	100	0	XP_005321829.2	F-box/LRR-repeat protein 20 isoform X1 [Ictidomys tridecemlineatus]
Q4J6C6	case2-VS-control	-2.09575	0.175354	-11.9516	3	0.00125997	0.00513303	Down	Q4J6C6	Prolyl endopeptidase-like OS=Homo sapiens OX=9606 GN=PREPL PE=1 SV=1	100	0	NP_006027.2	prolyl endopeptidase-like isoform 1 [Homo sapiens]
Q5SXM8	case2-VS-control	-1.02103	0.210403	-4.85275	8	0.00126742	0.00515885	Down	Q5SXM8	DNL-type zinc finger protein OS=Homo sapiens OX=9606 GN=DNLZ PE=1 SV=1	100	1e-125	NP_001074318.1	DNL-type zinc finger protein [Homo sapiens]
Q9NXG2	case2-VS-control	1.25836	0.259424	4.85058	8	0.00127091	0.00516852	Up	Q9NXG2	THUMP domain-containing protein 1 OS=Homo sapiens OX=9606 GN=THUMPD1 PE=1 SV=2	100	0	NP_060206.2	THUMP domain-containing protein 1 [Homo sapiens]
Q9BXJ8	case2-VS-control	-0.779172	0.160756	-4.84692	8	0.00127684	0.00518808	None	Q9BXJ8	Transmembrane protein 120A OS=Homo sapiens OX=9606 GN=TMEM120A PE=1 SV=1	100	0	NP_114131.1	transmembrane protein 120A isoform 1 [Homo sapiens]
Q9NPR2	case2-VS-control	-2.42783	0.0869484	-27.9227	2	0.00128012	0.00519346	Down	Q9NPR2	Semaphorin-4B OS=Homo sapiens OX=9606 GN=SEMA4B PE=1 SV=3	100	0	NP_064595.2	semaphorin-4B isoform 1 precursor [Homo sapiens]
Q9HD45	case2-VS-control	0.825446	0.17038	4.84473	8	0.00128041	0.00519346	None	Q9HD45	Transmembrane 9 superfamily member 3 OS=Homo sapiens OX=9606 GN=TM9SF3 PE=1 SV=2	100	0	NP_064508.3	transmembrane 9 superfamily member 3 precursor [Homo sapiens]
Q13268	case2-VS-control	1.55205	0.131435	11.8085	3	0.00130554	0.00529076	Up	Q13268	Dehydrogenase/reductase SDR family member 2, mitochondrial OS=Homo sapiens OX=9606 GN=DHRS2 PE=1 SV=4	100	0	NP_005785.1	dehydrogenase/reductase SDR family member 2, mitochondrial isoform 2 [Homo sapiens]
P36639	case2-VS-control	-1.26819	0.262743	-4.82673	8	0.00131007	0.00530447	Down	P36639	7,8-dihydro-8-oxoguanine triphosphatase OS=Homo sapiens OX=9606 GN=NUDT1 PE=1 SV=3	100	5e-144	P36639.3	RecName: Full=7,8-dihydro-8-oxoguanine triphosphatase; AltName: Full=2-hydroxy-dATP diphosphatase; AltName: Full=8-oxo-dGTPase; AltName: Full=Nucleoside diphosphate-linked moiety X motif 1; Short=Nudix motif 1; Flags: Precursor
Q12904	case2-VS-control	0.669829	0.138822	4.82508	8	0.00131283	0.00531101	None	Q12904	Aminoacyl tRNA synthase complex-interacting multifunctional protein 1 OS=Homo sapiens OX=9606 GN=AIMP1 PE=1 SV=2	100	0	NP_004748.2	aminoacyl tRNA synthase complex-interacting multifunctional protein 1 isoform a precursor [Homo sapiens]
P13798	case2-VS-control	2.50606	0.519495	4.82403	8	0.0013146	0.00531349	Up	P13798	Acylamino-acid-releasing enzyme OS=Homo sapiens OX=9606 GN=APEH PE=1 SV=4	100	0	NP_001631.3	acylamino-acid-releasing enzyme [Homo sapiens]
Q6PIW4	case2-VS-control	0.424771	0.0881375	4.81941	8	0.00132235	0.00534017	None	Q6PIW4	Fidgetin-like protein 1 OS=Homo sapiens OX=9606 GN=FIGNL1 PE=1 SV=2	100	0	NP_071399.2	fidgetin-like protein 1 isoform 1 [Homo sapiens]
Q8WVT3	case2-VS-control	-0.845058	0.130838	-6.45883	5	0.00132433	0.00534329	None	Q8WVT3	Trafficking protein particle complex subunit 12 OS=Homo sapiens OX=9606 GN=TRAPPC12 PE=1 SV=3	100	0	NP_057114.5	trafficking protein particle complex subunit 12 [Homo sapiens]
P07942	case2-VS-control	-0.791905	0.164391	-4.81721	8	0.00132607	0.00534329	None	P07942	Laminin subunit beta-1 OS=Homo sapiens OX=9606 GN=LAMB1 PE=1 SV=2	100	0	NP_002282.2	laminin subunit beta-1 precursor [Homo sapiens]
Q8IXJ6	case2-VS-control	0.757605	0.157305	4.81616	8	0.00132785	0.00534329	None	Q8IXJ6	NAD-dependent protein deacetylase sirtuin-2 OS=Homo sapiens OX=9606 GN=SIRT2 PE=1 SV=2	100	0	NP_036369.2	NAD-dependent protein deacetylase sirtuin-2 isoform 1 [Homo sapiens]
Q9Y4L1	case2-VS-control	-0.46378	0.0963001	-4.81599	8	0.00132814	0.00534329	None	Q9Y4L1	Hypoxia up-regulated protein 1 OS=Homo sapiens OX=9606 GN=HYOU1 PE=1 SV=1	100	0	NP_006380.1	hypoxia up-regulated protein 1 precursor [Homo sapiens]
P28715	case2-VS-control	1.06118	0.220366	4.81554	8	0.0013289	0.00534329	Up	P28715	DNA repair protein complementing XP-G cells OS=Homo sapiens OX=9606 GN=ERCC5 PE=1 SV=3	100	0	P28715.3	RecName: Full=DNA repair protein complementing XP-G cells; AltName: Full=DNA excision repair protein ERCC-5; AltName: Full=Xeroderma pigmentosum group G-complementing protein
O60888	case2-VS-control	-2.03902	0.423705	-4.81235	8	0.00133432	0.00536045	Down	O60888	Protein CutA OS=Homo sapiens OX=9606 GN=CUTA PE=1 SV=2	100	3e-125	NP_001014840.1	protein CutA isoform 3 precursor [Homo sapiens]
O43617	case2-VS-control	0.419707	0.0872942	4.80796	8	0.00134182	0.00538424	None	O43617	Trafficking protein particle complex subunit 3 OS=Homo sapiens OX=9606 GN=TRAPPC3 PE=1 SV=1	100	5e-132	NP_055223.1	trafficking protein particle complex subunit 3 isoform 1 [Homo sapiens]
O00161	case2-VS-control	-0.447963	0.0931835	-4.80732	8	0.00134292	0.00538424	None	O00161	Synaptosomal-associated protein 23 OS=Homo sapiens OX=9606 GN=SNAP23 PE=1 SV=1	100	2e-153	NP_003816.2	synaptosomal-associated protein 23 isoform SNAP23A [Homo sapiens]
Q16836	case2-VS-control	0.495871	0.103159	4.80685	8	0.00134373	0.00538424	None	Q16836	Hydroxyacyl-coenzyme A dehydrogenase, mitochondrial OS=Homo sapiens OX=9606 GN=HADH PE=1 SV=3	100	0	Q16836.3	RecName: Full=Hydroxyacyl-coenzyme A dehydrogenase, mitochondrial; Short=HCDH; AltName: Full=Medium and short-chain L-3-hydroxyacyl-coenzyme A dehydrogenase; AltName: Full=Short-chain 3-hydroxyacyl-CoA dehydrogenase; Flags: Precursor
P51149	case2-VS-control	-0.373267	0.0777233	-4.80251	8	0.0013512	0.00540947	None	P51149	Ras-related protein Rab-7a OS=Homo sapiens OX=9606 GN=RAB7A PE=1 SV=1	100	1e-153	NP_004628.4	ras-related protein Rab-7a [Homo sapiens]
Q658Y4	case2-VS-control	1.25633	0.223573	5.61931	6	0.00135657	0.00542629	Up	Q658Y4	Protein FAM91A1 OS=Homo sapiens OX=9606 GN=FAM91A1 PE=1 SV=3	100	0	Q658Y4.3	RecName: Full=Protein FAM91A1
Q9ULR0	case2-VS-control	-0.574491	0.119803	-4.79529	8	0.00136372	0.00545015	None	Q9ULR0	Pre-mRNA-splicing factor ISY1 homolog OS=Homo sapiens OX=9606 GN=ISY1 PE=1 SV=3	100	0	NP_065752.1	pre-mRNA-splicing factor ISY1 homolog isoform 2 [Homo sapiens]
O15382	case2-VS-control	0.980936	0.204632	4.79367	8	0.00136655	0.00545678	None	O15382	Branched-chain-amino-acid aminotransferase, mitochondrial OS=Homo sapiens OX=9606 GN=BCAT2 PE=1 SV=2	100	0	NP_001181.2	branched-chain-amino-acid aminotransferase, mitochondrial isoform a precursor [Homo sapiens]
P49137	case2-VS-control	1.51176	0.190667	7.92876	4	0.00136969	0.0054646	Up	P49137	MAP kinase-activated protein kinase 2 OS=Homo sapiens OX=9606 GN=MAPKAPK2 PE=1 SV=1	100	0	NP_116584.2	MAP kinase-activated protein kinase 2 isoform 2 [Homo sapiens]
P26373	case2-VS-control	0.55392	0.115756	4.78525	8	0.00138135	0.00550635	None	P26373	60S ribosomal protein L13 OS=Homo sapiens OX=9606 GN=RPL13 PE=1 SV=4	100	7e-151	NP_150254.1	60S ribosomal protein L13 isoform 1 [Homo sapiens]
Q9UM00	case2-VS-control	1.12878	0.236055	4.78185	8	0.00138739	0.00552568	Up	Q9UM00	Calcium load-activated calcium channel OS=Homo sapiens OX=9606 GN=TMCO1 PE=1 SV=1	100	1e-137	NP_001009631.1	calcium load-activated calcium channel precursor [Rattus norvegicus]
Q96PV6	case2-VS-control	-1.1321	0.221907	-5.10171	7	0.00139685	0.00555859	Down	Q96PV6	Leukocyte receptor cluster member 8 OS=Homo sapiens OX=9606 GN=LENG8 PE=1 SV=3	100	0	NP_443157.1	leukocyte receptor cluster member 8 [Homo sapiens]
P46977	case2-VS-control	0.384429	0.08051	4.77491	8	0.00139976	0.00556095	None	P46977	Dolichyl-diphosphooligosaccharide--protein glycosyltransferase subunit STT3A OS=Homo sapiens OX=9606 GN=STT3A PE=1 SV=2	100	0	NP_689926.1	dolichyl-diphosphooligosaccharide--protein glycosyltransferase subunit STT3A isoform a [Homo sapiens]
Q9NYL9	case2-VS-control	0.551693	0.115541	4.77487	8	0.00139985	0.00556095	None	Q9NYL9	Tropomodulin-3 OS=Homo sapiens OX=9606 GN=TMOD3 PE=1 SV=1	100	0	NP_055362.1	tropomodulin-3 [Homo sapiens]
A4D1E9	case2-VS-control	0.55736	0.116791	4.77228	8	0.0014045	0.00557462	None	A4D1E9	GTP-binding protein 10 OS=Homo sapiens OX=9606 GN=GTPBP10 PE=1 SV=1	100	0	NP_149098.2	GTP-binding protein 10 isoform 2 [Homo sapiens]
Q9NRR5	case2-VS-control	-0.651937	0.136756	-4.76716	8	0.00141374	0.00560652	None	Q9NRR5	Ubiquilin-4 OS=Homo sapiens OX=9606 GN=UBQLN4 PE=1 SV=2	100	0	NP_064516.2	ubiquilin-4 isoform 1 [Homo sapiens]
O43347	case2-VS-control	-2.84955	0.248242	-11.4789	3	0.00141915	0.00562314	Down	O43347	RNA-binding protein Musashi homolog 1 OS=Homo sapiens OX=9606 GN=MSI1 PE=1 SV=1	100	0	NP_002433.1	RNA-binding protein Musashi homolog 1 [Homo sapiens]
Q92545	case2-VS-control	1.17856	0.247449	4.76286	8	0.00142158	0.00562785	Up	Q92545	Transmembrane protein 131 OS=Homo sapiens OX=9606 GN=TMEM131 PE=1 SV=3	100	0	NP_056163.1	transmembrane protein 131 [Homo sapiens]
A6NCS6	case2-VS-control	0.685783	0.144008	4.76211	8	0.00142295	0.00562785	None	A6NCS6	Uncharacterized protein C2orf72 OS=Homo sapiens OX=9606 GN=C2orf72 PE=1 SV=2	100	0	NP_001138466.1	uncharacterized protein C2orf72 [Homo sapiens]
Q9NSE4	case2-VS-control	0.528384	0.110969	4.76154	8	0.00142399	0.00562785	None	Q9NSE4	Isoleucine--tRNA ligase, mitochondrial OS=Homo sapiens OX=9606 GN=IARS2 PE=1 SV=2	100	0	NP_060530.3	isoleucine--tRNA ligase, mitochondrial precursor [Homo sapiens]
P05787	case2-VS-control	0.556976	0.117001	4.76042	8	0.00142604	0.00563114	None	P05787	Keratin, type II cytoskeletal 8 OS=Homo sapiens OX=9606 GN=KRT8 PE=1 SV=7	100	0	NP_002264.1	keratin, type II cytoskeletal 8 isoform 2 [Homo sapiens]
P07910	case2-VS-control	0.779914	0.164009	4.7553	8	0.00143545	0.00566346	None	P07910	Heterogeneous nuclear ribonucleoproteins C1/C2 OS=Homo sapiens OX=9606 GN=HNRNPC PE=1 SV=4	100	0	BAD92764.1	Heterogeneous nuclear ribonucleoproteins C1/C2 variant, partial [Homo sapiens]
Q14847	case2-VS-control	1.02839	0.216358	4.75321	8	0.0014393	0.00567382	Up	Q14847	LIM and SH3 domain protein 1 OS=Homo sapiens OX=9606 GN=LASP1 PE=1 SV=2	100	0	NP_006139.1	LIM and SH3 domain protein 1 isoform a [Homo sapiens]
P30050	case2-VS-control	0.715455	0.150568	4.75172	8	0.00144206	0.00567967	None	P30050	60S ribosomal protein L12 OS=Homo sapiens OX=9606 GN=RPL12 PE=1 SV=1	100	8e-118	XP_006074559.1	PREDICTED: 60S ribosomal protein L12 [Bubalus bubalis]
P11021	case2-VS-control	-0.558508	0.117554	-4.75109	8	0.00144323	0.00567967	None	P11021	Endoplasmic reticulum chaperone BiP OS=Homo sapiens OX=9606 GN=HSPA5 PE=1 SV=2	100	0	NP_005338.1	78 kDa glucose-regulated protein precursor [Homo sapiens]
Q6JQN1	case2-VS-control	-0.426819	0.0674042	-6.33223	5	0.00144862	0.005696	None	Q6JQN1	Acyl-CoA dehydrogenase family member 10 OS=Homo sapiens OX=9606 GN=ACAD10 PE=1 SV=1	100	0	NP_079523.3	acyl-CoA dehydrogenase family member 10 isoform b [Homo sapiens]
Q9BYJ9	case2-VS-control	1.19591	0.251944	4.74671	8	0.00145137	0.005702	Up	Q9BYJ9	YTH domain-containing family protein 1 OS=Homo sapiens OX=9606 GN=YTHDF1 PE=1 SV=1	100	0	NP_060268.2	YTH domain-containing family protein 1 [Homo sapiens]
P16383	case2-VS-control	-0.747253	0.134953	-5.53713	6	0.00146346	0.0057446	None	P16383	GC-rich sequence DNA-binding factor 2 OS=Homo sapiens OX=9606 GN=GCFC2 PE=1 SV=2	100	0	NP_003194.3	GC-rich sequence DNA-binding factor 2 isoform 1 [Homo sapiens]
Q99807	case2-VS-control	-0.858663	0.1812	-4.73877	8	0.00146628	0.00575079	None	Q99807	5-demethoxyubiquinone hydroxylase, mitochondrial OS=Homo sapiens OX=9606 GN=COQ7 PE=1 SV=3	100	1e-160	NP_057222.2	5-demethoxyubiquinone hydroxylase, mitochondrial isoform 1 [Homo sapiens]
Q13823	case2-VS-control	0.640166	0.135167	4.7361	8	0.00147133	0.00576365	None	Q13823	Nucleolar GTP-binding protein 2 OS=Homo sapiens OX=9606 GN=GNL2 PE=1 SV=1	100	0	NP_037417.1	nucleolar GTP-binding protein 2 isoform 1 [Homo sapiens]
P62244	case2-VS-control	1.07515	0.22703	4.73572	8	0.00147205	0.00576365	Up	P62244	40S ribosomal protein S15a OS=Homo sapiens OX=9606 GN=RPS15A PE=1 SV=2	99.231	3e-92	XP_003642170.2	PREDICTED: 40S ribosomal protein S15a isoform X1 [Gallus gallus]
Q15434	case2-VS-control	1.3919	0.294173	4.73156	8	0.00147994	0.00578967	Up	Q15434	RNA-binding motif, single-stranded-interacting protein 2 OS=Homo sapiens OX=9606 GN=RBMS2 PE=1 SV=1	100	0	NP_002889.1	RNA-binding motif, single-stranded-interacting protein 2 [Homo sapiens]
Q13421	case2-VS-control	0.626293	0.132607	4.72294	8	0.00149649	0.00584944	None	Q13421	Mesothelin OS=Homo sapiens OX=9606 GN=MSLN PE=1 SV=2	100	0	XP_016878342.1	PREDICTED: mesothelin isoform X1 [Homo sapiens]
Q96HS1	case2-VS-control	0.409308	0.0867375	4.71893	8	0.00150424	0.00587477	None	Q96HS1	Serine/threonine-protein phosphatase PGAM5, mitochondrial OS=Homo sapiens OX=9606 GN=PGAM5 PE=1 SV=2	100	0	NP_001164014.1	serine/threonine-protein phosphatase PGAM5, mitochondrial isoform 1 [Homo sapiens]
O14656	case2-VS-control	-1.09641	0.232385	-4.71807	8	0.00150592	0.00587637	Down	O14656	Torsin-1A OS=Homo sapiens OX=9606 GN=TOR1A PE=1 SV=1	100	0	EAW87907.1	torsin family 1, member A (torsin A), isoform CRA_a [Homo sapiens]
O60825	case2-VS-control	2.93487	0.533341	5.50281	6	0.00151091	0.005884	Up	O60825	6-phosphofructo-2-kinase/fructose-2,6-bisphosphatase 2 OS=Homo sapiens OX=9606 GN=PFKFB2 PE=1 SV=2	100	0	NP_006203.2	6-phosphofructo-2-kinase/fructose-2,6-bisphosphatase 2 isoform a [Homo sapiens]
P20592	case2-VS-control	-2.38776	0.309073	-7.72558	4	0.00151151	0.005884	Down	P20592	Interferon-induced GTP-binding protein Mx2 OS=Homo sapiens OX=9606 GN=MX2 PE=1 SV=1	100	0	NP_002454.1	interferon-induced GTP-binding protein Mx2 [Homo sapiens]
Q15043	case2-VS-control	-0.462871	0.0981703	-4.71498	8	0.00151192	0.005884	None	Q15043	Zinc transporter ZIP14 OS=Homo sapiens OX=9606 GN=SLC39A14 PE=1 SV=3	100	0	NP_001338586.1	zinc transporter ZIP14 isoform d [Homo sapiens]
Q6KC79	case2-VS-control	-0.578416	0.105156	-5.50056	6	0.00151407	0.005884	None	Q6KC79	Nipped-B-like protein OS=Homo sapiens OX=9606 GN=NIPBL PE=1 SV=2	100	0	NP_597677.2	nipped-B-like protein isoform A [Homo sapiens]
P06748	case2-VS-control	-0.949101	0.201345	-4.7138	8	0.00151423	0.005884	None	P06748	Nucleophosmin OS=Homo sapiens OX=9606 GN=NPM1 PE=1 SV=2	100	0	NP_002511.1	nucleophosmin isoform 1 [Homo sapiens]
Q53FV1	case2-VS-control	1.08691	0.230664	4.7121	8	0.00151755	0.00589195	Up	Q53FV1;Q9P0S3	ORM1-like protein 2 OS=Homo sapiens OX=9606 GN=ORMDL2 PE=1 SV=2	100	3e-108	NP_054901.1	ORM1-like protein 2 [Homo sapiens]
Q9BRP1	case2-VS-control	1.64459	0.327375	5.02357	7	0.00152433	0.00591331	Up	Q9BRP1	Programmed cell death protein 2-like OS=Homo sapiens OX=9606 GN=PDCD2L PE=1 SV=1	100	0	NP_115722.1	programmed cell death protein 2-like isoform 1 [Homo sapiens]
O00330	case2-VS-control	0.534802	0.113623	4.7068	8	0.00152798	0.00592251	None	O00330	Pyruvate dehydrogenase protein X component, mitochondrial OS=Homo sapiens OX=9606 GN=PDHX PE=1 SV=3	100	0	NP_003468.2	pyruvate dehydrogenase protein X component, mitochondrial isoform 1 precursor [Homo sapiens]
Q15119	case2-VS-control	-2.5273	0.460444	-5.48884	6	0.00153072	0.0059282	Down	Q15119	[Pyruvate dehydrogenase (acetyl-transferring)] kinase isozyme 2, mitochondrial OS=Homo sapiens OX=9606 GN=PDK2 PE=1 SV=2	100	0	XP_523791.4	PREDICTED: pyruvate dehydrogenase kinase, isozyme 2 isoform X1 [Pan troglodytes]
P12235	case2-VS-control	0.456354	0.0969995	4.70471	8	0.00153212	0.00592862	None	P12235	ADP/ATP translocase 1 OS=Homo sapiens OX=9606 GN=SLC25A4 PE=1 SV=4	100	0	NP_001142.2	ADP/ATP translocase 1 [Homo sapiens]
O76031	case2-VS-control	0.710788	0.151178	4.70167	8	0.00153814	0.00594695	None	O76031	ATP-dependent Clp protease ATP-binding subunit clpX-like, mitochondrial OS=Homo sapiens OX=9606 GN=CLPX PE=1 SV=2	100	0	NP_006651.2	ATP-dependent Clp protease ATP-binding subunit clpX-like, mitochondrial precursor [Homo sapiens]
Q14166	case2-VS-control	1.14144	0.242826	4.70063	8	0.0015402	0.00594698	Up	Q14166	Tubulin--tyrosine ligase-like protein 12 OS=Homo sapiens OX=9606 GN=TTLL12 PE=1 SV=2	100	0	NP_055955.1	tubulin--tyrosine ligase-like protein 12 [Homo sapiens]
P30740	case2-VS-control	4.51977	0.824494	5.48187	6	0.00154072	0.00594698	Up	P30740	Leukocyte elastase inhibitor OS=Homo sapiens OX=9606 GN=SERPINB1 PE=1 SV=1	100	0	NP_109591.1	leukocyte elastase inhibitor [Homo sapiens]
Q9BXF6	case2-VS-control	-0.979828	0.208533	-4.69867	8	0.00154411	0.00595514	None	Q9BXF6	Rab11 family-interacting protein 5 OS=Homo sapiens OX=9606 GN=RAB11FIP5 PE=1 SV=1	100	0	NP_056285.1	rab11 family-interacting protein 5 [Homo sapiens]
Q13526	case2-VS-control	-0.959574	0.20438	-4.69505	8	0.00155136	0.00597809	None	Q13526	Peptidyl-prolyl cis-trans isomerase NIMA-interacting 1 OS=Homo sapiens OX=9606 GN=PIN1 PE=1 SV=1	100	2e-118	NP_006212.1	peptidyl-prolyl cis-trans isomerase NIMA-interacting 1 [Homo sapiens]
Q9UFW8	case2-VS-control	-1.1767	0.250886	-4.6902	8	0.00156112	0.00601071	Down	Q9UFW8	CGG triplet repeat-binding protein 1 OS=Homo sapiens OX=9606 GN=CGGBP1 PE=1 SV=2	100	9e-123	NP_003654.3	CGG triplet repeat-binding protein 1 [Homo sapiens]
Q86SQ4	case2-VS-control	-1.94816	0.31329	-6.21839	5	0.00157227	0.0060486	Down	Q86SQ4	Adhesion G-protein coupled receptor G6 OS=Homo sapiens OX=9606 GN=ADGRG6 PE=1 SV=3	100	0	Q86SQ4.3	RecName: Full=Adhesion G-protein coupled receptor G6; AltName: Full=Developmentally regulated G-protein-coupled receptor; AltName: Full=G-protein coupled receptor 126; AltName: Full=Vascular inducible G protein-coupled receptor; Contains: RecName: Full=ADGRG6 N-terminal fragment; Short=ADGRG6-NTF; Contains: RecName: Full=ADGRG6 C-terminal fragment; Short=ADGRG6-CTF; Flags: Precursor
Q9BRR8	case2-VS-control	0.782539	0.102556	7.63033	4	0.00158422	0.00608951	None	Q9BRR8	G patch domain-containing protein 1 OS=Homo sapiens OX=9606 GN=GPATCH1 PE=1 SV=1	100	0	NP_060495.2	G patch domain-containing protein 1 [Homo sapiens]
Q6PK04	case2-VS-control	1.3067	0.279336	4.67787	8	0.00158624	0.00609222	Up	Q6PK04	Coiled-coil domain-containing protein 137 OS=Homo sapiens OX=9606 GN=CCDC137 PE=1 SV=1	100	0	NP_954981.1	coiled-coil domain-containing protein 137 [Homo sapiens]
P67870	case2-VS-control	-0.894714	0.191511	-4.67186	8	0.00159867	0.00613485	None	P67870	Casein kinase II subunit beta OS=Homo sapiens OX=9606 GN=CSNK2B PE=1 SV=1	100	5e-164	XP_015669770.1	PREDICTED: casein kinase II subunit beta [Protobothrops mucrosquamatus]
O75367	case2-VS-control	1.59867	0.342281	4.67063	8	0.0016012	0.00613948	Up	O75367	Core histone macro-H2A.1 OS=Homo sapiens OX=9606 GN=H2AFY PE=1 SV=4	100	0	NP_613258.2	core histone macro-H2A.1 isoform 3 [Homo sapiens]
Q5THJ4	case2-VS-control	1.24751	0.267213	4.6686	8	0.00160544	0.00615063	Up	Q5THJ4	Vacuolar protein sorting-associated protein 13D OS=Homo sapiens OX=9606 GN=VPS13D PE=1 SV=2	100	0	NP_056193.2	vacuolar protein sorting-associated protein 13D isoform 1 [Homo sapiens]
Q92793	case2-VS-control	-1.08388	0.0985553	-10.9977	3	0.00160985	0.00616238	Down	Q92793	CREB-binding protein OS=Homo sapiens OX=9606 GN=CREBBP PE=1 SV=3	100	0	NP_004371.2	CREB-binding protein isoform a [Homo sapiens]
Q7L8L6	case2-VS-control	0.852316	0.182671	4.66585	8	0.00161117	0.00616238	None	Q7L8L6	FAST kinase domain-containing protein 5, mitochondrial OS=Homo sapiens OX=9606 GN=FASTKD5 PE=1 SV=1	100	0	NP_068598.1	FAST kinase domain-containing protein 5, mitochondrial [Homo sapiens]
Q9NPA0	case2-VS-control	0.873909	0.187401	4.66331	8	0.00161648	0.00617761	None	Q9NPA0	ER membrane protein complex subunit 7 OS=Homo sapiens OX=9606 GN=EMC7 PE=1 SV=1	100	5e-175	NP_064539.1	ER membrane protein complex subunit 7 precursor [Homo sapiens]
Q96ME1	case2-VS-control	2.75565	0.363435	7.58224	4	0.00162258	0.00619578	Up	Q96ME1	F-box/LRR-repeat protein 18 OS=Homo sapiens OX=9606 GN=FBXL18 PE=1 SV=2	100	0	Q96ME1.2	RecName: Full=F-box/LRR-repeat protein 18; AltName: Full=F-box and leucine-rich repeat protein 18
Q9NY35	case2-VS-control	-1.03547	0.191263	-5.41387	6	0.00164225	0.00626572	Down	Q9NY35	Claudin domain-containing protein 1 OS=Homo sapiens OX=9606 GN=CLDND1 PE=1 SV=1	100	0	NP_001035272.1	claudin domain-containing protein 1 isoform b [Homo sapiens]
Q9UBU9	case2-VS-control	0.284864	0.0612805	4.64853	8	0.00164783	0.00628186	None	Q9UBU9	Nuclear RNA export factor 1 OS=Homo sapiens OX=9606 GN=NXF1 PE=1 SV=1	99.838	0	XP_007993342.1	PREDICTED: nuclear RNA export factor 1 [Chlorocebus sabaeus]
P22570	case2-VS-control	0.928255	0.199976	4.64183	8	0.00166224	0.00633157	None	P22570	NADPH:adrenodoxin oxidoreductase, mitochondrial OS=Homo sapiens OX=9606 GN=FDXR PE=1 SV=3	100	0	P22570.3	RecName: Full=NADPH:adrenodoxin oxidoreductase, mitochondrial; Short=AR; Short=Adrenodoxin reductase; AltName: Full=Ferredoxin--NADP(+) reductase; Short=Ferredoxin reductase; Flags: Precursor
O60293	case2-VS-control	-0.596692	0.128567	-4.64109	8	0.00166385	0.00633248	None	O60293	Zinc finger C3H1 domain-containing protein OS=Homo sapiens OX=9606 GN=ZFC3H1 PE=1 SV=3	100	0	NP_659419.3	zinc finger C3H1 domain-containing protein [Homo sapiens]
Q6NW34	case2-VS-control	0.972747	0.209655	4.63975	8	0.00166676	0.00633374	None	Q6NW34	Nucleolus and neural progenitor protein OS=Homo sapiens OX=9606 GN=NEPRO PE=1 SV=3	100	0	NP_056227.2	nucleolus and neural progenitor protein isoform a [Homo sapiens]
Q92797	case2-VS-control	0.74814	0.161248	4.63967	8	0.00166692	0.00633374	None	Q92797	Symplekin OS=Homo sapiens OX=9606 GN=SYMPK PE=1 SV=2	100	0	NP_004810.2	symplekin [Homo sapiens]
Q9UKK6	case2-VS-control	0.516848	0.0842384	6.13554	5	0.00167013	0.00634074	None	Q9UKK6	NTF2-related export protein 1 OS=Homo sapiens OX=9606 GN=NXT1 PE=1 SV=1	100	1e-101	NP_037380.1	NTF2-related export protein 1 [Homo sapiens]
Q96Q05	case2-VS-control	1.27123	0.235794	5.39126	6	0.00167768	0.0063642	Up	Q96Q05	Trafficking protein particle complex subunit 9 OS=Homo sapiens OX=9606 GN=TRAPPC9 PE=1 SV=2	100	0	NP_001153844.1	trafficking protein particle complex subunit 9 isoform b [Homo sapiens]
P05387	case2-VS-control	0.735818	0.158812	4.63327	8	0.00168086	0.00637104	None	P05387	60S acidic ribosomal protein P2 OS=Homo sapiens OX=9606 GN=RPLP2 PE=1 SV=1	100	3e-73	NP_000995.1	60S acidic ribosomal protein P2 [Homo sapiens]
Q9BRQ8	case2-VS-control	0.486974	0.105168	4.63044	8	0.00168708	0.00638937	None	Q9BRQ8	Apoptosis-inducing factor 2 OS=Homo sapiens OX=9606 GN=AIFM2 PE=1 SV=1	100	0	NP_116186.1	apoptosis-inducing factor 2 [Homo sapiens]
Q9H7E9	case2-VS-control	0.898215	0.194057	4.62862	8	0.0016911	0.00639935	None	Q9H7E9	UPF0488 protein C8orf33 OS=Homo sapiens OX=9606 GN=C8orf33 PE=1 SV=1	100	3e-166	NP_075568.1	UPF0488 protein C8orf33 [Homo sapiens]
Q5NDL2	case2-VS-control	1.26406	0.273259	4.62587	8	0.00169716	0.00641702	Up	Q5NDL2	EGF domain-specific O-linked N-acetylglucosamine transferase OS=Homo sapiens OX=9606 GN=EOGT PE=1 SV=1	100	0	NP_001265618.1	EGF domain-specific O-linked N-acetylglucosamine transferase isoform a precursor [Homo sapiens]
O94886	case2-VS-control	2.5919	0.346215	7.48638	4	0.00170252	0.00643205	Up	O94886	CSC1-like protein 1 OS=Homo sapiens OX=9606 GN=TMEM63A PE=1 SV=3	100	0	NP_055513.2	CSC1-like protein 1 [Homo sapiens]
O60930	case2-VS-control	0.483051	0.104536	4.62092	8	0.00170816	0.00644808	None	O60930	Ribonuclease H1 OS=Homo sapiens OX=9606 GN=RNASEH1 PE=1 SV=2	100	0	NP_002927.2	ribonuclease H1 isoform 1 precursor [Homo sapiens]
Q00653	case2-VS-control	0.65245	0.0270349	24.1336	2	0.00171253	0.00645934	None	Q00653	Nuclear factor NF-kappa-B p100 subunit OS=Homo sapiens OX=9606 GN=NFKB2 PE=1 SV=4	100	0	NP_001070962.1	nuclear factor NF-kappa-B p100 subunit isoform a [Homo sapiens]
Q92769	case2-VS-control	-0.637532	0.138174	-4.61397	8	0.0017237	0.00649616	None	Q92769	Histone deacetylase 2 OS=Homo sapiens OX=9606 GN=HDAC2 PE=1 SV=2	99.795	0	XP_008005472.1	PREDICTED: LOW QUALITY PROTEIN: histone deacetylase 2 [Chlorocebus sabaeus]
Q5JVF3	case2-VS-control	-0.678666	0.147278	-4.60807	8	0.00173703	0.00654108	None	Q5JVF3	PCI domain-containing protein 2 OS=Homo sapiens OX=9606 GN=PCID2 PE=1 SV=2	100	0	NP_060856.2	PCI domain-containing protein 2 isoform 1 [Homo sapiens]
P53680	case2-VS-control	-0.614318	0.133435	-4.60386	8	0.00174661	0.0065718	None	P53680	AP-2 complex subunit sigma OS=Homo sapiens OX=9606 GN=AP2S1 PE=1 SV=2	100	7e-102	XP_004479122.2	PREDICTED: AP-2 complex subunit sigma [Dasypus novemcinctus]
Q13330	case2-VS-control	-0.708145	0.153851	-4.60281	8	0.00174902	0.00657554	None	Q13330	Metastasis-associated protein MTA1 OS=Homo sapiens OX=9606 GN=MTA1 PE=1 SV=2	100	0	NP_004680.2	metastasis-associated protein MTA1 isoform MTA1 [Homo sapiens]
P48059	case2-VS-control	1.02041	0.221734	4.60194	8	0.001751	0.00657763	Up	P48059	LIM and senescent cell antigen-like-containing domain protein 1 OS=Homo sapiens OX=9606 GN=LIMS1 PE=1 SV=4	100	0	XP_003922814.1	PREDICTED: LIM and senescent cell antigen-like-containing domain protein 1 isoform X4 [Saimiri boliviensis boliviensis]
Q14141	case2-VS-control	1.67938	0.314238	5.3443	6	0.0017541	0.006579	Up	Q14141	Septin-6 OS=Homo sapiens OX=9606 GN=SEPT6 PE=1 SV=4	100	0	NP_055944.2	septin-6 isoform B [Homo sapiens]
P26640	case2-VS-control	-0.949329	0.206352	-4.60054	8	0.00175421	0.006579	None	P26640	Valine--tRNA ligase OS=Homo sapiens OX=9606 GN=VARS PE=1 SV=4	100	0	NP_006286.1	valine--tRNA ligase [Homo sapiens]
Q9Y580	case2-VS-control	0.792398	0.172444	4.59511	8	0.00176671	0.00661964	None	Q9Y580	RNA-binding protein 7 OS=Homo sapiens OX=9606 GN=RBM7 PE=1 SV=1	100	0	NP_057174.1	RNA-binding protein 7 isoform b [Homo sapiens]
Q8IXT5	case2-VS-control	-0.556024	0.121017	-4.59459	8	0.00176791	0.00661964	None	Q8IXT5	RNA-binding protein 12B OS=Homo sapiens OX=9606 GN=RBM12B PE=1 SV=2	100	0	NP_976324.2	RNA-binding protein 12B [Homo sapiens]
Q03013	case2-VS-control	3.4874	0.653772	5.33428	6	0.00177091	0.00662551	Up	Q03013	Glutathione S-transferase Mu 4 OS=Homo sapiens OX=9606 GN=GSTM4 PE=1 SV=3	100	2e-163	NP_000841.1	glutathione S-transferase Mu 4 isoform 1 [Homo sapiens]
P29401	case2-VS-control	1.12902	0.245956	4.59034	8	0.00177778	0.00664584	Up	P29401	Transketolase OS=Homo sapiens OX=9606 GN=TKT PE=1 SV=3	100	0	NP_001055.1	transketolase isoform 1 [Homo sapiens]
P14866	case2-VS-control	0.707983	0.15427	4.58926	8	0.0017803	0.00664989	None	P14866	Heterogeneous nuclear ribonucleoprotein L OS=Homo sapiens OX=9606 GN=HNRNPL PE=1 SV=2	100	0	NP_001524.2	heterogeneous nuclear ribonucleoprotein L isoform a [Homo sapiens]
Q99584	case2-VS-control	1.74021	0.379347	4.58739	8	0.00178466	0.00665866	Up	Q99584	Protein S100-A13 OS=Homo sapiens OX=9606 GN=S100A13 PE=1 SV=1	100	2e-64	NP_005970.1	protein S100-A13 [Homo sapiens]
P55327	case2-VS-control	-0.291137	0.0634697	-4.58702	8	0.00178552	0.00665866	None	P55327	Tumor protein D52 OS=Homo sapiens OX=9606 GN=TPD52 PE=1 SV=2	100	1e-161	NP_001020423.1	tumor protein D52 isoform 1 [Homo sapiens]
P09382	case2-VS-control	0.718889	0.156757	4.58601	8	0.00178789	0.00666212	None	P09382	Galectin-1 OS=Homo sapiens OX=9606 GN=LGALS1 PE=1 SV=2	100	4e-96	NP_002296.1	galectin-1 [Homo sapiens]
Q15118	case2-VS-control	-1.74487	0.380567	-4.58493	8	0.00179041	0.00666615	Down	Q15118	[Pyruvate dehydrogenase (acetyl-transferring)] kinase isozyme 1, mitochondrial OS=Homo sapiens OX=9606 GN=PDK1 PE=1 SV=1	100	0	NP_002601.1	[Pyruvate dehydrogenase (acetyl-transferring)] kinase isozyme 1, mitochondrial isoform 2 precursor [Homo sapiens]
Q8NB37	case2-VS-control	-1.0726	0.201696	-5.3179	6	0.00179878	0.00669192	Down	Q8NB37	Glutamine amidotransferase-like class 1 domain-containing protein 1 OS=Homo sapiens OX=9606 GN=GATD1 PE=1 SV=1	100	1e-160	NP_872418.1	glutamine amidotransferase-like class 1 domain-containing protein 1 isoform 1 precursor [Homo sapiens]
Q96D05	case2-VS-control	0.431464	0.0942459	4.57806	8	0.00180659	0.00671557	None	Q96D05	Uncharacterized protein FAM241B OS=Homo sapiens OX=9606 GN=FAM241B PE=1 SV=1	100	1e-81	XP_001169572.1	PREDICTED: uncharacterized protein C10orf35 homolog isoform X1 [Pan troglodytes]
Q8NBF2	case2-VS-control	1.14694	0.235392	4.87244	7	0.00180919	0.00671985	Up	Q8NBF2	NHL repeat-containing protein 2 OS=Homo sapiens OX=9606 GN=NHLRC2 PE=1 SV=1	100	0	NP_940916.2	NHL repeat-containing protein 2 [Homo sapiens]
Q99720	case2-VS-control	-0.472026	0.103151	-4.57605	8	0.00181135	0.00672249	None	Q99720	Sigma non-opioid intracellular receptor 1 OS=Homo sapiens OX=9606 GN=SIGMAR1 PE=1 SV=1	100	1e-160	NP_005857.1	sigma non-opioid intracellular receptor 1 isoform 1 [Homo sapiens]
Q53EP0	case2-VS-control	-1.01544	0.221962	-4.57483	8	0.00181427	0.00672791	Down	Q53EP0	Fibronectin type III domain-containing protein 3B OS=Homo sapiens OX=9606 GN=FNDC3B PE=1 SV=2	100	0	NP_073600.3	fibronectin type III domain-containing protein 3B [Homo sapiens]
Q9Y6A9	case2-VS-control	0.480842	0.105302	4.56633	8	0.0018346	0.00679784	None	Q9Y6A9	Signal peptidase complex subunit 1 OS=Homo sapiens OX=9606 GN=SPCS1 PE=1 SV=4	100	2e-72	XP_003954564.3	PREDICTED: signal peptidase complex subunit 1 [Pan troglodytes]
Q9HC38	case2-VS-control	1.82345	0.399831	4.56054	8	0.00184859	0.00684421	Up	Q9HC38	Glyoxalase domain-containing protein 4 OS=Homo sapiens OX=9606 GN=GLOD4 PE=1 SV=1	100	0	Q9HC38.1	RecName: Full=Glyoxalase domain-containing protein 4
Q9BXW6	case2-VS-control	1.29437	0.267354	4.84142	7	0.00187469	0.00693224	Up	Q9BXW6	Oxysterol-binding protein-related protein 1 OS=Homo sapiens OX=9606 GN=OSBPL1A PE=1 SV=2	100	0	NP_542164.2	oxysterol-binding protein-related protein 1 isoform 2 [Homo sapiens]
O75150	case2-VS-control	1.13465	0.234378	4.84111	7	0.00187536	0.00693224	Up	O75150	E3 ubiquitin-protein ligase BRE1B OS=Homo sapiens OX=9606 GN=RNF40 PE=1 SV=5	100	0	NP_055586.1	E3 ubiquitin-protein ligase BRE1B isoform 1 [Homo sapiens]
Q15075	case2-VS-control	1.15087	0.253298	4.54353	8	0.00189039	0.00698222	Up	Q15075	Early endosome antigen 1 OS=Homo sapiens OX=9606 GN=EEA1 PE=1 SV=2	100	0	Q15075.2	RecName: Full=Early endosome antigen 1; AltName: Full=Endosome-associated protein p162; AltName: Full=Zinc finger FYVE domain-containing protein 2
P16402	case2-VS-control	0.699734	0.154076	4.54148	8	0.00189551	0.00699553	None	P16402	Histone H1.3 OS=Homo sapiens OX=9606 GN=HIST1H1D PE=1 SV=2	100	1e-132	NP_005311.1	histone H1.3 [Homo sapiens]
P78536	case2-VS-control	-0.514555	0.11333	-4.54032	8	0.00189839	0.00699648	None	P78536	Disintegrin and metalloproteinase domain-containing protein 17 OS=Homo sapiens OX=9606 GN=ADAM17 PE=1 SV=1	100	0	NP_003174.3	disintegrin and metalloproteinase domain-containing protein 17 preproprotein [Homo sapiens]
Q96N67	case2-VS-control	0.554299	0.122112	4.53928	8	0.00190098	0.00699648	None	Q96N67	Dedicator of cytokinesis protein 7 OS=Homo sapiens OX=9606 GN=DOCK7 PE=1 SV=4	100	0	XP_011540628.1	PREDICTED: dedicator of cytokinesis protein 7 isoform X1 [Homo sapiens]
P28838	case2-VS-control	-0.250691	0.0552298	-4.53905	8	0.00190157	0.00699648	None	P28838	Cytosol aminopeptidase OS=Homo sapiens OX=9606 GN=LAP3 PE=1 SV=3	100	0	NP_056991.2	cytosol aminopeptidase [Homo sapiens]
Q9NRR4	case2-VS-control	-1.72387	0.379794	-4.53895	8	0.00190181	0.00699648	Down	Q9NRR4	Ribonuclease 3 OS=Homo sapiens OX=9606 GN=DROSHA PE=1 SV=2	100	0	NP_037367.3	ribonuclease 3 isoform 1 [Homo sapiens]
Q9NS91	case2-VS-control	-1.38113	0.262693	-5.2576	6	0.00190579	0.00699697	Down	Q9NS91	E3 ubiquitin-protein ligase RAD18 OS=Homo sapiens OX=9606 GN=RAD18 PE=1 SV=2	100	0	NP_064550.3	E3 ubiquitin-protein ligase RAD18 [Homo sapiens]
O94851	case2-VS-control	1.52863	0.256602	5.9572	5	0.0019062	0.00699697	Up	O94851	[F-actin]-monooxygenase MICAL2 OS=Homo sapiens OX=9606 GN=MICAL2 PE=1 SV=1	100	0	NP_055447.1	[F-actin]-methionine sulfoxide oxidase MICAL2 isoform a [Homo sapiens]
Q15059	case2-VS-control	-1.45896	0.321604	-4.53651	8	0.00190793	0.00699697	Down	Q15059	Bromodomain-containing protein 3 OS=Homo sapiens OX=9606 GN=BRD3 PE=1 SV=1	100	0	NP_031397.1	bromodomain-containing protein 3 [Homo sapiens]
Q9Y3U8	case2-VS-control	0.60632	0.133654	4.53649	8	0.00190799	0.00699697	None	Q9Y3U8	60S ribosomal protein L36 OS=Homo sapiens OX=9606 GN=RPL36 PE=1 SV=3	100	2e-69	EDL38178.1	mCG5564, partial [Mus musculus]
Q13242	case2-VS-control	-0.66224	0.146072	-4.53367	8	0.00191509	0.00701746	None	Q13242	Serine/arginine-rich splicing factor 9 OS=Homo sapiens OX=9606 GN=SRSF9 PE=1 SV=1	100	1e-158	NP_003760.1	serine/arginine-rich splicing factor 9 [Homo sapiens]
Q8IWT0	case2-VS-control	0.990147	0.218573	4.53005	8	0.00192424	0.00704539	None	Q8IWT0	Protein archease OS=Homo sapiens OX=9606 GN=ZBTB8OS PE=1 SV=2	100	1e-122	NP_848642.1	protein archease isoform 1 [Homo sapiens]
Q9H269	case2-VS-control	-0.131815	0.0291045	-4.52904	8	0.00192681	0.00704925	None	Q9H269	Vacuolar protein sorting-associated protein 16 homolog OS=Homo sapiens OX=9606 GN=VPS16 PE=1 SV=2	100	0	NP_072097.2	vacuolar protein sorting-associated protein 16 homolog isoform 1 [Homo sapiens]
O75427	case2-VS-control	1.79767	0.174055	10.3282	3	0.00193611	0.00707767	Up	O75427	Leucine-rich repeat and calponin homology domain-containing protein 4 OS=Homo sapiens OX=9606 GN=LRCH4 PE=1 SV=2	100	0	NP_002310.2	leucine-rich repeat and calponin homology domain-containing protein 4 isoform 1 [Homo sapiens]
P30511	case2-VS-control	-1.28666	0.216789	-5.9351	5	0.00193811	0.00707939	Down	P30511	HLA class I histocompatibility antigen, alpha chain F OS=Homo sapiens OX=9606 GN=HLA-F PE=1 SV=3	100	0	CAB46623.1	major histocompatibility complex, class I, F [Homo sapiens]
Q69YQ0	case2-VS-control	-0.493065	0.068214	-7.22821	4	0.00194334	0.0070929	None	Q69YQ0	Cytospin-A OS=Homo sapiens OX=9606 GN=SPECC1L PE=1 SV=2	100	0	Q69YQ0.2	RecName: Full=Cytospin-A; AltName: Full=Renal carcinoma antigen NY-REN-22; AltName: Full=Sperm antigen with calponin homology and coiled-coil domains 1-like; Short=SPECC1-like protein
O15173	case2-VS-control	-0.953978	0.210994	-4.52135	8	0.00194645	0.00709615	None	O15173	Membrane-associated progesterone receptor component 2 OS=Homo sapiens OX=9606 GN=PGRMC2 PE=1 SV=1	100	5e-159	O15173.1	RecName: Full=Membrane-associated progesterone receptor component 2; AltName: Full=Progesterone membrane-binding protein; AltName: Full=Steroid receptor protein DG6
P62266	case2-VS-control	0.895181	0.198005	4.52101	8	0.0019473	0.00709615	None	P62266	40S ribosomal protein S23 OS=Homo sapiens OX=9606 GN=RPS23 PE=1 SV=3	100	3e-100	NP_001016.1	40S ribosomal protein S23 [Homo sapiens]
P10644	case2-VS-control	-1.19377	0.264152	-4.51927	8	0.00195179	0.00710693	Down	P10644	cAMP-dependent protein kinase type I-alpha regulatory subunit OS=Homo sapiens OX=9606 GN=PRKAR1A PE=1 SV=1	100	0	NP_002725.1	cAMP-dependent protein kinase type I-alpha regulatory subunit isoform a [Homo sapiens]
P62745	case2-VS-control	0.832857	0.184327	4.51837	8	0.0019541	0.00710973	None	P62745	Rho-related GTP-binding protein RhoB OS=Homo sapiens OX=9606 GN=RHOB PE=1 SV=1	100	5e-144	NP_004031.1	rho-related GTP-binding protein RhoB precursor [Homo sapiens]
O43567	case2-VS-control	0.999556	0.22128	4.51715	8	0.00195724	0.00711558	None	O43567	E3 ubiquitin-protein ligase RNF13 OS=Homo sapiens OX=9606 GN=RNF13 PE=1 SV=1	100	0	NP_009213.1	E3 ubiquitin-protein ligase RNF13 [Homo sapiens]
Q9H0C8	case2-VS-control	0.390499	0.0864987	4.51451	8	0.00196409	0.0071323	None	Q9H0C8	Integrin-linked kinase-associated serine/threonine phosphatase 2C OS=Homo sapiens OX=9606 GN=ILKAP PE=1 SV=1	100	0	NP_110395.1	integrin-linked kinase-associated serine/threonine phosphatase 2C [Homo sapiens]
Q8IY17	case2-VS-control	-0.929732	0.20596	-4.51414	8	0.00196505	0.0071323	None	Q8IY17	Neuropathy target esterase OS=Homo sapiens OX=9606 GN=PNPLA6 PE=1 SV=3	100	0	NP_001159583.1	neuropathy target esterase isoform a [Homo sapiens]
Q92530	case2-VS-control	1.14484	0.193522	5.91581	5	0.00196647	0.0071323	Up	Q92530	Proteasome inhibitor PI31 subunit OS=Homo sapiens OX=9606 GN=PSMF1 PE=1 SV=2	100	0	NP_006805.2	proteasome inhibitor PI31 subunit isoform 1 [Homo sapiens]
Q96T37	case2-VS-control	0.591565	0.131164	4.51013	8	0.00197547	0.00715933	None	Q96T37	RNA-binding protein 15 OS=Homo sapiens OX=9606 GN=RBM15 PE=1 SV=2	100	0	NP_073605.4	putative RNA-binding protein 15 isoform 1 [Homo sapiens]
P46782	case2-VS-control	1.00087	0.222518	4.49795	8	0.00200754	0.00726986	Up	P46782	40S ribosomal protein S5 OS=Homo sapiens OX=9606 GN=RPS5 PE=1 SV=4	100	1e-151	XP_017706029.1	PREDICTED: 40S ribosomal protein S5 isoform X2 [Rhinopithecus bieti]
E9PRG8	case2-VS-control	0.817048	0.181689	4.49695	8	0.00201018	0.00727007	None	E9PRG8	Uncharacterized protein C11orf98 OS=Homo sapiens OX=9606 GN=C11orf98 PE=4 SV=1	100	2e-83	E9PRG8.1	RecName: Full=Uncharacterized protein C11orf98
Q7Z4H8	case2-VS-control	-0.42678	0.0949229	-4.49606	8	0.00201254	0.00727007	None	Q7Z4H8	KDEL motif-containing protein 2 OS=Homo sapiens OX=9606 GN=KDELC2 PE=1 SV=2	100	0	NP_714916.3	KDEL motif-containing protein 2 precursor [Homo sapiens]
Q96A49	case2-VS-control	-1.2815	0.285035	-4.49592	8	0.00201291	0.00727007	Down	Q96A49	Synapse-associated protein 1 OS=Homo sapiens OX=9606 GN=SYAP1 PE=1 SV=1	100	0	NP_116185.2	synapse-associated protein 1 [Homo sapiens]
O15164	case2-VS-control	0.506443	0.112668	4.49501	8	0.00201535	0.00727007	None	O15164	Transcription intermediary factor 1-alpha OS=Homo sapiens OX=9606 GN=TRIM24 PE=1 SV=3	100	0	NP_056989.2	transcription intermediary factor 1-alpha isoform a [Homo sapiens]
Q99640	case2-VS-control	-0.769653	0.171225	-4.49497	8	0.00201545	0.00727007	None	Q99640	Membrane-associated tyrosine- and threonine-specific cdc2-inhibitory kinase OS=Homo sapiens OX=9606 GN=PKMYT1 PE=1 SV=1	100	0	NP_004194.3	membrane-associated tyrosine- and threonine-specific cdc2-inhibitory kinase isoform 1 [Homo sapiens]
P46100	case2-VS-control	-0.683184	0.152034	-4.49362	8	0.00201906	0.00727641	None	P46100	Transcriptional regulator ATRX OS=Homo sapiens OX=9606 GN=ATRX PE=1 SV=5	100	0	P46100.5	RecName: Full=Transcriptional regulator ATRX; AltName: Full=ATP-dependent helicase ATRX; AltName: Full=X-linked helicase II; AltName: Full=X-linked nuclear protein; Short=XNP; AltName: Full=Znf-HX
Q9Y6W5	case2-VS-control	0.752465	0.16747	4.49314	8	0.00202035	0.00727641	None	Q9Y6W5	Wiskott-Aldrich syndrome protein family member 2 OS=Homo sapiens OX=9606 GN=WASF2 PE=1 SV=3	100	0	NP_008921.1	wiskott-Aldrich syndrome protein family member 2 isoform 1 [Homo sapiens]
Q14919	case2-VS-control	-0.945232	0.210415	-4.49224	8	0.00202276	0.0072794	None	Q14919	Dr1-associated corepressor OS=Homo sapiens OX=9606 GN=DRAP1 PE=1 SV=3	100	2e-148	NP_006433.2	dr1-associated corepressor [Homo sapiens]
Q5T1M5	case2-VS-control	-0.795241	0.177161	-4.4888	8	0.00203196	0.00730686	None	Q5T1M5	FK506-binding protein 15 OS=Homo sapiens OX=9606 GN=FKBP15 PE=1 SV=2	100	0	NP_056073.1	FK506-binding protein 15 [Homo sapiens]
Q6P996	case2-VS-control	3.10371	0.305624	10.1553	3	0.00203438	0.00730986	Up	Q6P996	Pyridoxal-dependent decarboxylase domain-containing protein 1 OS=Homo sapiens OX=9606 GN=PDXDC1 PE=1 SV=2	100	0	NP_055842.2	pyridoxal-dependent decarboxylase domain-containing protein 1 isoform 1 [Homo sapiens]
Q14BN4	case2-VS-control	1.11607	0.215159	5.1872	6	0.00204001	0.0073244	Up	Q14BN4	Sarcolemmal membrane-associated protein OS=Homo sapiens OX=9606 GN=SLMAP PE=1 SV=1	100	0	NP_001291349.1	sarcolemmal membrane-associated protein isoform a [Homo sapiens]
O95782	case2-VS-control	-0.505165	0.11265	-4.48437	8	0.00204394	0.00733282	None	O95782	AP-2 complex subunit alpha-1 OS=Homo sapiens OX=9606 GN=AP2A1 PE=1 SV=3	100	0	NP_055018.2	AP-2 complex subunit alpha-1 isoform 1 [Homo sapiens]
Q8N5K1	case2-VS-control	0.587054	0.130967	4.48245	8	0.00204914	0.00734579	None	Q8N5K1	CDGSH iron-sulfur domain-containing protein 2 OS=Homo sapiens OX=9606 GN=CISD2 PE=1 SV=1	100	2e-94	NP_001008389.1	CDGSH iron-sulfur domain-containing protein 2 [Homo sapiens]
P13807	case2-VS-control	0.702852	0.156941	4.47844	8	0.00206005	0.00737919	None	P13807	Glycogen [starch] synthase, muscle OS=Homo sapiens OX=9606 GN=GYS1 PE=1 SV=2	100	0	NP_002094.2	glycogen [starch] synthase, muscle isoform 1 [Homo sapiens]
Q96A26	case2-VS-control	0.40002	0.0893872	4.47513	8	0.0020691	0.00740587	None	Q96A26	Protein FAM162A OS=Homo sapiens OX=9606 GN=FAM162A PE=1 SV=2	100	2e-110	NP_055182.3	protein FAM162A [Homo sapiens]
O43181	case2-VS-control	0.375602	0.0840141	4.47071	8	0.00208128	0.00744372	None	O43181	NADH dehydrogenase [ubiquinone] iron-sulfur protein 4, mitochondrial OS=Homo sapiens OX=9606 GN=NDUFS4 PE=1 SV=1	100	3e-125	NP_002486.1	NADH dehydrogenase [ubiquinone] iron-sulfur protein 4, mitochondrial isoform 1 precursor [Homo sapiens]
P62263	case2-VS-control	0.871668	0.19511	4.46758	8	0.00208993	0.00746882	None	P62263	40S ribosomal protein S14 OS=Homo sapiens OX=9606 GN=RPS14 PE=1 SV=3	100	3e-107	XP_018107476.1	PREDICTED: 40S ribosomal protein S14 isoform X1 [Xenopus laevis]
O15116	case2-VS-control	0.878885	0.196751	4.467	8	0.00209153	0.00746882	None	O15116	U6 snRNA-associated Sm-like protein LSm1 OS=Homo sapiens OX=9606 GN=LSM1 PE=1 SV=1	100	1e-90	NP_055277.1	U6 snRNA-associated Sm-like protein LSm1 [Homo sapiens]
Q9H0W8	case2-VS-control	0.736424	0.104015	7.08001	4	0.00210065	0.00749563	None	Q9H0W8	Protein SMG9 OS=Homo sapiens OX=9606 GN=SMG9 PE=1 SV=1	100	0	NP_061981.2	protein SMG9 [Homo sapiens]
O95831	case2-VS-control	-0.425069	0.095242	-4.46304	8	0.00210256	0.00749664	None	O95831	Apoptosis-inducing factor 1, mitochondrial OS=Homo sapiens OX=9606 GN=AIFM1 PE=1 SV=1	100	0	NP_004199.1	apoptosis-inducing factor 1, mitochondrial isoform AIF precursor [Homo sapiens]
P63151	case2-VS-control	1.79438	0.402497	4.45811	8	0.00211637	0.00754009	Up	P63151	Serine/threonine-protein phosphatase 2A 55 kDa regulatory subunit B alpha isoform OS=Homo sapiens OX=9606 GN=PPP2R2A PE=1 SV=1	100	0	XP_014445132.1	PREDICTED: serine/threonine-protein phosphatase 2A 55 kDa regulatory subunit B alpha isoform [Tupaia chinensis]
Q8N4T8	case2-VS-control	1.04874	0.235352	4.45604	8	0.00212218	0.00755498	Up	Q8N4T8	Carbonyl reductase family member 4 OS=Homo sapiens OX=9606 GN=CBR4 PE=1 SV=3	100	2e-171	NP_116172.2	carbonyl reductase family member 4 [Homo sapiens]
P62829	case2-VS-control	0.875386	0.196763	4.44894	8	0.00214232	0.00762079	None	P62829	60S ribosomal protein L23 OS=Homo sapiens OX=9606 GN=RPL23 PE=1 SV=1	100	2e-96	NP_000969.1	60S ribosomal protein L23 [Homo sapiens]
Q14683	case2-VS-control	-0.459561	0.103418	-4.44375	8	0.00215716	0.007667	None	Q14683	Structural maintenance of chromosomes protein 1A OS=Homo sapiens OX=9606 GN=SMC1A PE=1 SV=2	100	0	NP_006297.2	structural maintenance of chromosomes protein 1A isoform 1 [Homo sapiens]
Q12955	case2-VS-control	3.57111	0.166186	21.4886	2	0.00215862	0.007667	Up	Q12955	Ankyrin-3 OS=Homo sapiens OX=9606 GN=ANK3 PE=1 SV=3	100	0	NP_066267.2	ankyrin-3 isoform 1 [Homo sapiens]
P24043	case2-VS-control	-0.819792	0.184721	-4.43801	8	0.00217368	0.00771457	None	P24043	Laminin subunit alpha-2 OS=Homo sapiens OX=9606 GN=LAMA2 PE=1 SV=4	100	0	P24043.4	RecName: Full=Laminin subunit alpha-2; AltName: Full=Laminin M chain; AltName: Full=Laminin-12 subunit alpha; AltName: Full=Laminin-2 subunit alpha; AltName: Full=Laminin-4 subunit alpha; AltName: Full=Merosin heavy chain; Flags: Precursor
P09622	case2-VS-control	-0.518917	0.116948	-4.43715	8	0.00217618	0.00771752	None	P09622	Dihydrolipoyl dehydrogenase, mitochondrial OS=Homo sapiens OX=9606 GN=DLD PE=1 SV=2	100	0	NP_000099.2	dihydrolipoyl dehydrogenase, mitochondrial isoform 1 precursor [Homo sapiens]
Q3T906	case2-VS-control	1.18872	0.119889	9.91521	3	0.00218216	0.0077328	Up	Q3T906	N-acetylglucosamine-1-phosphotransferase subunits alpha/beta OS=Homo sapiens OX=9606 GN=GNPTAB PE=1 SV=1	100	0	NP_077288.2	N-acetylglucosamine-1-phosphotransferase subunits alpha/beta precursor [Homo sapiens]
O14734	case2-VS-control	-0.764321	0.172456	-4.43198	8	0.00219122	0.00775898	None	O14734	Acyl-coenzyme A thioesterase 8 OS=Homo sapiens OX=9606 GN=ACOT8 PE=1 SV=1	100	0	NP_005460.2	acyl-coenzyme A thioesterase 8 [Homo sapiens]
O75874	case2-VS-control	2.35131	0.531444	4.42438	8	0.00221352	0.00783193	Up	O75874	Isocitrate dehydrogenase [NADP] cytoplasmic OS=Homo sapiens OX=9606 GN=IDH1 PE=1 SV=2	100	0	NP_005887.2	isocitrate dehydrogenase [NADP] cytoplasmic [Homo sapiens]
Q5HYI8	case2-VS-control	-0.385949	0.0872613	-4.4229	8	0.00221789	0.00784139	None	Q5HYI8	Rab-like protein 3 OS=Homo sapiens OX=9606 GN=RABL3 PE=1 SV=1	100	9e-176	NP_776186.2	rab-like protein 3 [Homo sapiens]
P49411	case2-VS-control	0.253446	0.0573259	4.42115	8	0.00222309	0.00784477	None	P49411	Elongation factor Tu, mitochondrial OS=Homo sapiens OX=9606 GN=TUFM PE=1 SV=2	100	0	NP_003312.3	elongation factor Tu, mitochondrial precursor [Homo sapiens]
Q53FP2	case2-VS-control	0.8197	0.117543	6.9736	4	0.00222339	0.00784477	None	Q53FP2	Transmembrane protein 35A OS=Homo sapiens OX=9606 GN=TMEM35A PE=2 SV=2	100	1e-116	NP_067650.1	transmembrane protein 35A [Homo sapiens]
Q9Y281	case2-VS-control	-1.48786	0.336587	-4.42042	8	0.00222525	0.00784477	Down	Q9Y281	Cofilin-2 OS=Homo sapiens OX=9606 GN=CFL2 PE=1 SV=1	100	7e-118	NP_068733.1	cofilin-2 isoform 1 [Homo sapiens]
Q9NVU7	case2-VS-control	1.19718	0.270838	4.42029	8	0.00222562	0.00784477	Up	Q9NVU7	Protein SDA1 homolog OS=Homo sapiens OX=9606 GN=SDAD1 PE=1 SV=3	100	0	NP_060585.2	protein SDA1 homolog isoform 1 [Homo sapiens]
P61077	case2-VS-control	1.00103	0.226521	4.41913	8	0.00222907	0.00785095	Up	P61077;P62837	Ubiquitin-conjugating enzyme E2 D3 OS=Homo sapiens OX=9606 GN=UBE2D3 PE=1 SV=1	100	6e-107	NP_003331.1	ubiquitin-conjugating enzyme E2 D3 isoform 1 [Homo sapiens]
Q8N7H5	case2-VS-control	-0.650361	0.147258	-4.41646	8	0.00223703	0.00787299	None	Q8N7H5	RNA polymerase II-associated factor 1 homolog OS=Homo sapiens OX=9606 GN=PAF1 PE=1 SV=2	100	0	NP_061961.2	RNA polymerase II-associated factor 1 homolog isoform 1 [Homo sapiens]
Q9BYT8	case2-VS-control	0.487693	0.110483	4.41419	8	0.00224383	0.0078909	None	Q9BYT8	Neurolysin, mitochondrial OS=Homo sapiens OX=9606 GN=NLN PE=1 SV=1	100	0	NP_065777.1	neurolysin, mitochondrial [Homo sapiens]
Q8NCW5	case2-VS-control	0.228557	0.0518204	4.41056	8	0.00225472	0.00792321	None	Q8NCW5	NAD(P)H-hydrate epimerase OS=Homo sapiens OX=9606 GN=NAXE PE=1 SV=2	100	0	NP_658985.2	NAD(P)H-hydrate epimerase precursor [Homo sapiens]
Q04656	case2-VS-control	1.47702	0.315587	4.68023	7	0.00226021	0.00793645	Up	Q04656	Copper-transporting ATPase 1 OS=Homo sapiens OX=9606 GN=ATP7A PE=1 SV=4	100	0	NP_000043.4	copper-transporting ATPase 1 isoform 1 [Homo sapiens]
Q9UHB9	case2-VS-control	-1.02885	0.233464	-4.40687	8	0.00226585	0.00794785	Down	Q9UHB9	Signal recognition particle subunit SRP68 OS=Homo sapiens OX=9606 GN=SRP68 PE=1 SV=2	100	0	NP_055045.2	signal recognition particle subunit SRP68 isoform 1 [Homo sapiens]
Q9P2D3	case2-VS-control	1.01457	0.230243	4.40653	8	0.00226689	0.00794785	Up	Q9P2D3	HEAT repeat-containing protein 5B OS=Homo sapiens OX=9606 GN=HEATR5B PE=1 SV=2	100	0	NP_061897.1	HEAT repeat-containing protein 5B [Homo sapiens]
P61353	case2-VS-control	0.442158	0.100358	4.4058	8	0.00226909	0.00794954	None	P61353	60S ribosomal protein L27 OS=Homo sapiens OX=9606 GN=RPL27 PE=1 SV=2	100	1e-93	OPJ74552.1	60S ribosomal protein L27 [Patagioenas fasciata monilis]
Q8N3E9	case2-VS-control	1.34344	0.305032	4.40426	8	0.00227376	0.00795989	Up	Q8N3E9	1-phosphatidylinositol 4,5-bisphosphate phosphodiesterase delta-3 OS=Homo sapiens OX=9606 GN=PLCD3 PE=1 SV=3	100	0	NP_588614.1	1-phosphatidylinositol 4,5-bisphosphate phosphodiesterase delta-3 [Homo sapiens]
Q6IAN0	case2-VS-control	0.643028	0.14607	4.40218	8	0.00228009	0.00797602	None	Q6IAN0	Dehydrogenase/reductase SDR family member 7B OS=Homo sapiens OX=9606 GN=DHRS7B PE=1 SV=2	100	0	NP_056325.2	dehydrogenase/reductase SDR family member 7B isoform 1 [Homo sapiens]
Q5T3U5	case2-VS-control	1.20536	0.0577018	20.8894	2	0.0022838	0.00798296	Up	Q5T3U5	Multidrug resistance-associated protein 7 OS=Homo sapiens OX=9606 GN=ABCC10 PE=1 SV=1	100	0	NP_001185863.1	multidrug resistance-associated protein 7 isoform MRP7 [Homo sapiens]
Q9H1I8	case2-VS-control	1.52619	0.346861	4.39999	8	0.00228679	0.00798737	Up	Q9H1I8	Activating signal cointegrator 1 complex subunit 2 OS=Homo sapiens OX=9606 GN=ASCC2 PE=1 SV=3	100	0	XP_016884481.1	PREDICTED: activating signal cointegrator 1 complex subunit 2 isoform X2 [Homo sapiens]
Q9UJA5	case2-VS-control	1.13545	0.258265	4.39644	8	0.00229768	0.00801934	Up	Q9UJA5	tRNA (adenine(58)-N(1))-methyltransferase non-catalytic subunit TRM6 OS=Homo sapiens OX=9606 GN=TRMT6 PE=1 SV=1	100	0	NP_057023.2	tRNA (adenine(58)-N(1))-methyltransferase non-catalytic subunit TRM6 isoform 1 [Homo sapiens]
O95218	case2-VS-control	-1.74015	0.373143	-4.66349	7	0.00230503	0.00803894	Down	O95218	Zinc finger Ran-binding domain-containing protein 2 OS=Homo sapiens OX=9606 GN=ZRANB2 PE=1 SV=2	100	0	NP_976225.1	zinc finger Ran-binding domain-containing protein 2 isoform 1 [Homo sapiens]
Q9NP79	case2-VS-control	-0.316427	0.0720907	-4.3893	8	0.00231973	0.00808413	None	Q9NP79	Vacuolar protein sorting-associated protein VTA1 homolog OS=Homo sapiens OX=9606 GN=VTA1 PE=1 SV=1	100	0	NP_057569.2	vacuolar protein sorting-associated protein VTA1 homolog isoform a [Homo sapiens]
P04844	case2-VS-control	0.362562	0.0826477	4.38684	8	0.00232736	0.0081046	None	P04844	Dolichyl-diphosphooligosaccharide--protein glycosyltransferase subunit 2 OS=Homo sapiens OX=9606 GN=RPN2 PE=1 SV=3	100	0	NP_002942.2	dolichyl-diphosphooligosaccharide--protein glycosyltransferase subunit 2 isoform 1 precursor [Homo sapiens]
Q8N1F7	case2-VS-control	-0.576693	0.131555	-4.38367	8	0.00233725	0.00813294	None	Q8N1F7	Nuclear pore complex protein Nup93 OS=Homo sapiens OX=9606 GN=NUP93 PE=1 SV=2	100	0	NP_055484.3	nuclear pore complex protein Nup93 isoform 1 [Homo sapiens]
Q9Y320	case2-VS-control	1.73483	0.396253	4.37807	8	0.00235487	0.00818808	Up	Q9Y320	Thioredoxin-related transmembrane protein 2 OS=Homo sapiens OX=9606 GN=TMX2 PE=1 SV=1	100	0	EAW73779.1	thioredoxin domain containing 14, isoform CRA_c [Homo sapiens]
Q9H410	case2-VS-control	-1.76404	0.379905	-4.64338	7	0.00236018	0.00820039	Down	Q9H410	Kinetochore-associated protein DSN1 homolog OS=Homo sapiens OX=9606 GN=DSN1 PE=1 SV=2	100	0	NP_001138787.1	kinetochore-associated protein DSN1 homolog isoform 1 [Homo sapiens]
Q9Y6M5	case2-VS-control	0.71198	0.162753	4.37461	8	0.00236582	0.00821381	None	Q9Y6M5	Zinc transporter 1 OS=Homo sapiens OX=9606 GN=SLC30A1 PE=1 SV=3	100	0	NP_067017.2	zinc transporter 1 [Homo sapiens]
Q14254	case2-VS-control	-0.730814	0.167117	-4.37306	8	0.00237074	0.00822472	None	Q14254	Flotillin-2 OS=Homo sapiens OX=9606 GN=FLOT2 PE=1 SV=2	100	0	NP_004466.2	flotillin-2 isoform 1 [Homo sapiens]
P78345	case2-VS-control	0.800165	0.183129	4.3694	8	0.00238239	0.00825894	None	P78345	Ribonuclease P protein subunit p38 OS=Homo sapiens OX=9606 GN=RPP38 PE=1 SV=2	100	0	NP_892117.1	ribonuclease P protein subunit p38 [Homo sapiens]
P28331	case2-VS-control	0.334447	0.0766015	4.36606	8	0.0023931	0.00828986	None	P28331	NADH-ubiquinone oxidoreductase 75 kDa subunit, mitochondrial OS=Homo sapiens OX=9606 GN=NDUFS1 PE=1 SV=3	100	0	NP_001186913.1	NADH-ubiquinone oxidoreductase 75 kDa subunit, mitochondrial isoform 5 [Homo sapiens]
Q92520	case2-VS-control	-0.549602	0.1259	-4.36539	8	0.00239525	0.00829112	None	Q92520	Protein FAM3C OS=Homo sapiens OX=9606 GN=FAM3C PE=1 SV=1	100	2e-168	NP_055703.1	protein FAM3C precursor [Homo sapiens]
P05106	case2-VS-control	-2.44772	0.120949	-20.2376	2	0.00243274	0.00841457	Down	P05106	Integrin beta-3 OS=Homo sapiens OX=9606 GN=ITGB3 PE=1 SV=2	100	0	NP_000203.2	integrin beta-3 precursor [Homo sapiens]
P36404	case2-VS-control	0.581531	0.133589	4.35313	8	0.00243501	0.00841616	None	P36404	ADP-ribosylation factor-like protein 2 OS=Homo sapiens OX=9606 GN=ARL2 PE=1 SV=4	100	2e-132	NP_001658.2	ADP-ribosylation factor-like protein 2 isoform 1 [Homo sapiens]
Q9H6E4	case2-VS-control	0.409225	0.0942057	4.34395	8	0.00246525	0.00851431	None	Q9H6E4	Coiled-coil domain-containing protein 134 OS=Homo sapiens OX=9606 GN=CCDC134 PE=1 SV=1	100	9e-169	NP_079097.1	coiled-coil domain-containing protein 134 isoform 1 precursor [Homo sapiens]
Q14746	case2-VS-control	0.969734	0.142988	6.78194	4	0.00246758	0.008516	None	Q14746	Conserved oligomeric Golgi complex subunit 2 OS=Homo sapiens OX=9606 GN=COG2 PE=1 SV=1	100	0	NP_031383.1	conserved oligomeric Golgi complex subunit 2 isoform 1 [Homo sapiens]
Q16851	case2-VS-control	1.19463	0.275097	4.34258	8	0.00246979	0.00851728	Up	Q16851	UTP--glucose-1-phosphate uridylyltransferase OS=Homo sapiens OX=9606 GN=UGP2 PE=1 SV=5	100	0	NP_006750.3	UTP--glucose-1-phosphate uridylyltransferase isoform a [Homo sapiens]
Q5T9L3	case2-VS-control	-1.32202	0.304595	-4.34025	8	0.00247755	0.00853769	Down	Q5T9L3	Protein wntless homolog OS=Homo sapiens OX=9606 GN=WLS PE=1 SV=2	100	0	NP_079187.3	protein wntless homolog isoform 1 precursor [Homo sapiens]
P37198	case2-VS-control	-0.403355	0.0930026	-4.33703	8	0.00248833	0.00856843	None	P37198	Nuclear pore glycoprotein p62 OS=Homo sapiens OX=9606 GN=NUP62 PE=1 SV=3	100	0	NP_036478.2	nuclear pore glycoprotein p62 [Homo sapiens]
Q8TB22	case2-VS-control	0.80168	0.184919	4.33529	8	0.00249413	0.00858204	None	Q8TB22	Spermatogenesis-associated protein 20 OS=Homo sapiens OX=9606 GN=SPATA20 PE=2 SV=3	100	0	NP_001245301.1	spermatogenesis-associated protein 20 isoform 2 precursor [Homo sapiens]
Q9NU23	case2-VS-control	-1.38863	0.320381	-4.33431	8	0.00249743	0.00858651	Down	Q9NU23	LYR motif-containing protein 2 OS=Homo sapiens OX=9606 GN=LYRM2 PE=1 SV=1	100	2e-57	NP_065199.1	LYR motif-containing protein 2 [Homo sapiens]
Q10471	case2-VS-control	-0.514627	0.118747	-4.3338	8	0.00249914	0.00858651	None	Q10471	Polypeptide N-acetylgalactosaminyltransferase 2 OS=Homo sapiens OX=9606 GN=GALNT2 PE=1 SV=1	100	0	NP_004472.1	polypeptide N-acetylgalactosaminyltransferase 2 precursor [Homo sapiens]
Q9BVS5	case2-VS-control	0.768004	0.167336	4.5896	7	0.00251498	0.00863451	None	Q9BVS5	tRNA (adenine(58)-N(1))-methyltransferase, mitochondrial OS=Homo sapiens OX=9606 GN=TRMT61B PE=1 SV=2	100	0	NP_060380.3	tRNA (adenine(58)-N(1))-methyltransferase, mitochondrial precursor [Homo sapiens]
P46013	case2-VS-control	-0.460215	0.106375	-4.32633	8	0.00252443	0.00866052	None	P46013	Proliferation marker protein Ki-67 OS=Homo sapiens OX=9606 GN=MKI67 PE=1 SV=2	100	0	NP_002408.3	proliferation marker protein Ki-67 isoform 1 [Homo sapiens]
Q15022	case2-VS-control	-0.961512	0.17198	-5.59083	5	0.00252639	0.00866084	None	Q15022	Polycomb protein SUZ12 OS=Homo sapiens OX=9606 GN=SUZ12 PE=1 SV=3	100	0	NP_056170.2	polycomb protein SUZ12 isoform 1 [Homo sapiens]
Q9Y6V7	case2-VS-control	0.557909	0.129025	4.32404	8	0.00253225	0.00867452	None	Q9Y6V7	Probable ATP-dependent RNA helicase DDX49 OS=Homo sapiens OX=9606 GN=DDX49 PE=1 SV=1	100	0	NP_061943.2	probable ATP-dependent RNA helicase DDX49 [Homo sapiens]
P23921	case2-VS-control	-0.762883	0.176507	-4.32212	8	0.00253882	0.00869056	None	P23921	Ribonucleoside-diphosphate reductase large subunit OS=Homo sapiens OX=9606 GN=RRM1 PE=1 SV=1	100	0	NP_001024.1	ribonucleoside-diphosphate reductase large subunit isoform 1 [Homo sapiens]
P11142	case2-VS-control	-0.420989	0.0974755	-4.31892	8	0.00254978	0.00872164	None	P11142	Heat shock cognate 71 kDa protein OS=Homo sapiens OX=9606 GN=HSPA8 PE=1 SV=1	100	0	KFO35963.1	Heat shock cognate 71 kDa protein [Fukomys damarensis]
P28482	case2-VS-control	0.587004	0.135943	4.31803	8	0.00255285	0.0087257	None	P28482	Mitogen-activated protein kinase 1 OS=Homo sapiens OX=9606 GN=MAPK1 PE=1 SV=3	100	0	NP_620407.1	mitogen-activated protein kinase 1 [Homo sapiens]
Q9NZM3	case2-VS-control	0.566028	0.13111	4.31721	8	0.00255567	0.0087289	None	Q9NZM3	Intersectin-2 OS=Homo sapiens OX=9606 GN=ITSN2 PE=1 SV=3	100	0	NP_006268.2	intersectin-2 isoform 1 [Homo sapiens]
Q92945	case2-VS-control	0.370914	0.0863415	4.29589	8	0.00263033	0.00897726	None	Q92945	Far upstream element-binding protein 2 OS=Homo sapiens OX=9606 GN=KHSRP PE=1 SV=4	100	0	NP_003676.2	far upstream element-binding protein 2 [Homo sapiens]
Q8TED1	case2-VS-control	-0.498612	0.116128	-4.29365	8	0.00263832	0.0089979	None	Q8TED1	Probable glutathione peroxidase 8 OS=Homo sapiens OX=9606 GN=GPX8 PE=1 SV=2	100	1e-150	NP_001008398.2	probable glutathione peroxidase 8 isoform a [Homo sapiens]
P57772	case2-VS-control	-0.786593	0.183267	-4.29206	8	0.00264399	0.00900822	None	P57772	Selenocysteine-specific elongation factor OS=Homo sapiens OX=9606 GN=EEFSEC PE=1 SV=4	100	0	NP_068756.2	selenocysteine-specific elongation factor [Homo sapiens]
P29353	case2-VS-control	0.331413	0.0772216	4.29171	8	0.00264524	0.00900822	None	P29353	SHC-transforming protein 1 OS=Homo sapiens OX=9606 GN=SHC1 PE=1 SV=4	100	0	NP_892113.4	SHC-transforming protein 1 isoform 1 [Homo sapiens]
Q15366	case2-VS-control	0.44829	0.104531	4.28859	8	0.00265642	0.00903964	None	Q15366	Poly(rC)-binding protein 2 OS=Homo sapiens OX=9606 GN=PCBP2 PE=1 SV=1	100	0	NP_001013241.1	poly(rC)-binding protein 2 [Rattus norvegicus]
Q5SRE5	case2-VS-control	-0.599835	0.139928	-4.28674	8	0.00266309	0.00905568	None	Q5SRE5	Nucleoporin NUP188 homolog OS=Homo sapiens OX=9606 GN=NUP188 PE=1 SV=1	100	0	NP_056169.1	nucleoporin NUP188 homolog [Homo sapiens]
P27816	case2-VS-control	2.09558	0.48942	4.28177	8	0.00268109	0.00911019	Up	P27816	Microtubule-associated protein 4 OS=Homo sapiens OX=9606 GN=MAP4 PE=1 SV=3	100	0	NP_002366.2	microtubule-associated protein 4 isoform 1 [Homo sapiens]
P49748	case2-VS-control	0.160955	0.037624	4.27799	8	0.00269483	0.00914741	None	P49748	Very long-chain specific acyl-CoA dehydrogenase, mitochondrial OS=Homo sapiens OX=9606 GN=ACADVL PE=1 SV=1	100	0	NP_000009.1	very long-chain specific acyl-CoA dehydrogenase, mitochondrial isoform 1 precursor [Homo sapiens]
O15260	case2-VS-control	-0.902752	0.211038	-4.27767	8	0.002696	0.00914741	None	O15260	Surfeit locus protein 4 OS=Homo sapiens OX=9606 GN=SURF4 PE=1 SV=3	100	0	NP_149351.1	surfeit locus protein 4 isoform 1 [Homo sapiens]
Q6QNY1	case2-VS-control	0.692284	0.152808	4.53041	7	0.00269837	0.00914878	None	Q6QNY1	Biogenesis of lysosome-related organelles complex 1 subunit 2 OS=Homo sapiens OX=9606 GN=BLOC1S2 PE=1 SV=1	100	2e-96	NP_776170.2	biogenesis of lysosome-related organelles complex 1 subunit 2 isoform 1 [Homo sapiens]
Q13162	case2-VS-control	-0.691734	0.161885	-4.27299	8	0.00271314	0.00918659	None	Q13162	Peroxiredoxin-4 OS=Homo sapiens OX=9606 GN=PRDX4 PE=1 SV=1	100	0	NP_006397.1	peroxiredoxin-4 precursor [Homo sapiens]
P57768	case2-VS-control	1.12386	0.12212	9.20296	3	0.0027135	0.00918659	Up	P57768	Sorting nexin-16 OS=Homo sapiens OX=9606 GN=SNX16 PE=1 SV=2	100	0	NP_071416.2	sorting nexin-16 isoform a [Homo sapiens]
Q8TCT9	case2-VS-control	-0.742102	0.173763	-4.27077	8	0.00272135	0.00920644	None	Q8TCT9	Minor histocompatibility antigen H13 OS=Homo sapiens OX=9606 GN=HM13 PE=1 SV=1	100	0	NP_110416.1	minor histocompatibility antigen H13 isoform 1 [Homo sapiens]
P63172	case2-VS-control	0.618295	0.14502	4.26353	8	0.0027482	0.00929047	None	P63172	Dynein light chain Tctex-type 1 OS=Homo sapiens OX=9606 GN=DYNLT1 PE=1 SV=1	100	2e-79	NP_006510.1	dynein light chain Tctex-type 1 isoform 1 [Homo sapiens]
Q9NVT9	case2-VS-control	-0.622889	0.146146	-4.2621	8	0.00275353	0.00929995	None	Q9NVT9	Armadillo repeat-containing protein 1 OS=Homo sapiens OX=9606 GN=ARMC1 PE=1 SV=1	100	0	NP_060590.1	armadillo repeat-containing protein 1 isoform 1 [Homo sapiens]
O75530	case2-VS-control	-0.86299	0.202499	-4.2617	8	0.00275502	0.00929995	None	O75530	Polycomb protein EED OS=Homo sapiens OX=9606 GN=EED PE=1 SV=2	100	0	NP_068676.1	polycomb protein EED [Mus musculus]
L0R8F8	case2-VS-control	0.62096	0.145804	4.25887	8	0.00276564	0.00932772	None	L0R8F8	MIEF1 upstream open reading frame protein OS=Homo sapiens OX=9606 GN=MIEF1 PE=1 SV=1	100	6e-43	L0R8F8.1	RecName: Full=MIEF1 upstream open reading frame protein
Q9Y6G5	case2-VS-control	-0.394937	0.0927423	-4.25843	8	0.00276728	0.00932772	None	Q9Y6G5	COMM domain-containing protein 10 OS=Homo sapiens OX=9606 GN=COMMD10 PE=1 SV=1	100	4e-145	NP_057228.1	COMM domain-containing protein 10 isoform a [Homo sapiens]
L0R6Q1	case2-VS-control	-0.765394	0.179775	-4.2575	8	0.00277078	0.00933274	None	L0R6Q1	SLC35A4 upstream open reading frame protein OS=Homo sapiens OX=9606 GN=SLC35A4 PE=3 SV=1	100	2e-68	L0R6Q1.1	RecName: Full=SLC35A4 upstream open reading frame protein
Q9UKN8	case2-VS-control	-1.05647	0.248247	-4.25571	8	0.00277751	0.00934861	Down	Q9UKN8	General transcription factor 3C polypeptide 4 OS=Homo sapiens OX=9606 GN=GTF3C4 PE=1 SV=2	100	0	NP_036336.2	general transcription factor 3C polypeptide 4 [Homo sapiens]
Q12894	case2-VS-control	1.535	0.360854	4.25381	8	0.00278472	0.00936603	Up	Q12894	Interferon-related developmental regulator 2 OS=Homo sapiens OX=9606 GN=IFRD2 PE=1 SV=3	100	0	NP_006755.4	interferon-related developmental regulator 2 [Homo sapiens]
Q16527	case2-VS-control	-0.556355	0.114374	-4.86433	6	0.00281048	0.00944506	None	Q16527	Cysteine and glycine-rich protein 2 OS=Homo sapiens OX=9606 GN=CSRP2 PE=1 SV=3	99.482	2e-140	ELK02522.1	Cysteine and glycine-rich protein 2 [Pteropus alecto]
P04908	case2-VS-control	1.20046	0.282723	4.24607	8	0.00281416	0.00944506	Up	P04908;Q7L7L0;Q93077	Histone H2A type 1-B/E OS=Homo sapiens OX=9606 GN=HIST1H2AB PE=1 SV=2	100	2e-88	XP_020008928.1	histone H2A type 1-like [Castor canadensis]
Q96RU3	case2-VS-control	-1.40578	0.214733	-6.54662	4	0.00281433	0.00944506	Down	Q96RU3	Formin-binding protein 1 OS=Homo sapiens OX=9606 GN=FNBP1 PE=1 SV=2	100	0	NP_055848.1	formin-binding protein 1 [Homo sapiens]
Q9HBH1	case2-VS-control	1.18099	0.278223	4.24477	8	0.00281914	0.00945227	Up	Q9HBH1	Peptide deformylase, mitochondrial OS=Homo sapiens OX=9606 GN=PDF PE=1 SV=1	100	3e-174	NP_071736.1	peptide deformylase, mitochondrial precursor [Homo sapiens]
P23381	case2-VS-control	1.175	0.276836	4.24439	8	0.00282057	0.00945227	Up	P23381	Tryptophan--tRNA ligase, cytoplasmic OS=Homo sapiens OX=9606 GN=WARS PE=1 SV=2	100	0	NP_004175.2	tryptophan--tRNA ligase, cytoplasmic isoform a [Homo sapiens]
Q9UBL3	case2-VS-control	-0.432841	0.102028	-4.24239	8	0.00282826	0.00947121	None	Q9UBL3	Set1/Ash2 histone methyltransferase complex subunit ASH2 OS=Homo sapiens OX=9606 GN=ASH2L PE=1 SV=1	100	0	NP_004665.2	set1/Ash2 histone methyltransferase complex subunit ASH2 isoform a [Homo sapiens]
P27635	case2-VS-control	0.741553	0.174939	4.23892	8	0.00284165	0.00950917	None	P27635	60S ribosomal protein L10 OS=Homo sapiens OX=9606 GN=RPL10 PE=1 SV=4	100	4e-159	XP_006167047.1	PREDICTED: 60S ribosomal protein L10 isoform X1 [Tupaia chinensis]
Q6P9B6	case2-VS-control	1.05294	0.234748	4.48538	7	0.00284782	0.00952289	Up	Q6P9B6	TLD domain-containing protein 1 OS=Homo sapiens OX=9606 GN=TLDC1 PE=1 SV=2	100	0	NP_065998.3	TLD domain-containing protein 1 [Homo sapiens]
Q14147	case2-VS-control	0.92439	0.218447	4.23164	8	0.00286993	0.0095899	None	Q14147	Probable ATP-dependent RNA helicase DHX34 OS=Homo sapiens OX=9606 GN=DHX34 PE=1 SV=2	100	0	NP_055496.2	probable ATP-dependent RNA helicase DHX34 [Homo sapiens]
Q99729	case2-VS-control	-0.470949	0.111307	-4.23109	8	0.00287208	0.00959019	None	Q99729	Heterogeneous nuclear ribonucleoprotein A/B OS=Homo sapiens OX=9606 GN=HNRNPAB PE=1 SV=2	100	0	Q99729.2	RecName: Full=Heterogeneous nuclear ribonucleoprotein A/B; Short=hnRNP A/B; AltName: Full=APOBEC1-binding protein 1; Short=ABBP-1
Q70CQ2	case2-VS-control	1.24785	0.230067	5.42385	5	0.00288612	0.00963012	Up	Q70CQ2	Ubiquitin carboxyl-terminal hydrolase 34 OS=Homo sapiens OX=9606 GN=USP34 PE=1 SV=2	99.972	0	EAW99998.1	ubiquitin specific peptidase 34, partial [Homo sapiens]
P49407	case2-VS-control	0.853306	0.202378	4.21639	8	0.00293022	0.00977021	None	P49407	Beta-arrestin-1 OS=Homo sapiens OX=9606 GN=ARRB1 PE=1 SV=2	100	0	NP_004032.2	beta-arrestin-1 isoform A [Homo sapiens]
Q9BSD7	case2-VS-control	1.09801	0.260662	4.21239	8	0.00294626	0.00981664	Up	Q9BSD7	Cancer-related nucleoside-triphosphatase OS=Homo sapiens OX=9606 GN=NTPCR PE=1 SV=1	100	4e-135	NP_115700.1	cancer-related nucleoside-triphosphatase isoform 1 [Homo sapiens]
Q00688	case2-VS-control	1.33154	0.316165	4.21154	8	0.00294965	0.00982084	Up	Q00688	Peptidyl-prolyl cis-trans isomerase FKBP3 OS=Homo sapiens OX=9606 GN=FKBP3 PE=1 SV=1	100	3e-163	NP_002004.1	peptidyl-prolyl cis-trans isomerase FKBP3 [Homo sapiens]
Q9BPX6	case2-VS-control	0.642994	0.152719	4.2103	8	0.00295464	0.0098304	None	Q9BPX6	Calcium uptake protein 1, mitochondrial OS=Homo sapiens OX=9606 GN=MICU1 PE=1 SV=1	100	0	NP_001182447.1	calcium uptake protein 1, mitochondrial isoform 2 [Homo sapiens]
Q16630	case2-VS-control	0.296553	0.0704654	4.20849	8	0.00296197	0.00984077	None	Q16630	Cleavage and polyadenylation specificity factor subunit 6 OS=Homo sapiens OX=9606 GN=CPSF6 PE=1 SV=2	100	0	NP_008938.2	cleavage and polyadenylation specificity factor subunit 6 isoform 1 [Homo sapiens]
Q8WWC4	case2-VS-control	0.527957	0.125451	4.20848	8	0.00296201	0.00984077	None	Q8WWC4	m-AAA protease-interacting protein 1, mitochondrial OS=Homo sapiens OX=9606 GN=MAIP1 PE=1 SV=1	100	0	NP_078796.2	m-AAA protease-interacting protein 1, mitochondrial precursor [Homo sapiens]
Q9Y2D0	case2-VS-control	1.79358	0.403366	4.44654	7	0.00298407	0.00990694	Up	Q9Y2D0	Carbonic anhydrase 5B, mitochondrial OS=Homo sapiens OX=9606 GN=CA5B PE=1 SV=1	100	0	NP_009151.1	carbonic anhydrase 5B, mitochondrial precursor [Homo sapiens]
Q7RTP0	case2-VS-control	2.4578	0.276384	8.89269	3	0.00299878	0.00994489	Up	Q7RTP0	Magnesium transporter NIPA1 OS=Homo sapiens OX=9606 GN=NIPA1 PE=1 SV=1	100	0	NP_653200.2	magnesium transporter NIPA1 isoform 1 [Homo sapiens]
Q9NRK6	case2-VS-control	0.754315	0.179633	4.1992	8	0.0029998	0.00994489	None	Q9NRK6	ATP-binding cassette sub-family B member 10, mitochondrial OS=Homo sapiens OX=9606 GN=ABCB10 PE=1 SV=2	100	0	NP_036221.2	ATP-binding cassette sub-family B member 10, mitochondrial [Homo sapiens]
Q8NHH9	case2-VS-control	0.579675	0.138092	4.19775	8	0.00300573	0.00995744	None	Q8NHH9	Atlastin-2 OS=Homo sapiens OX=9606 GN=ATL2 PE=1 SV=2	100	0	NP_001129145.1	atlastin-2 isoform 2 [Homo sapiens]
P38606	case2-VS-control	0.577953	0.13783	4.19323	8	0.00302438	0.010012	None	P38606	V-type proton ATPase catalytic subunit A OS=Homo sapiens OX=9606 GN=ATP6V1A PE=1 SV=2	100	0	NP_001681.2	V-type proton ATPase catalytic subunit A [Homo sapiens]
P68400	case2-VS-control	-0.51426	0.122697	-4.19129	8	0.00303239	0.0100314	None	P68400	Casein kinase II subunit alpha OS=Homo sapiens OX=9606 GN=CSNK2A1 PE=1 SV=1	100	0	NP_001886.1	casein kinase II subunit alpha isoform a [Homo sapiens]
O43823	case2-VS-control	0.630962	0.150593	4.18985	8	0.00303839	0.0100441	None	O43823	A-kinase anchor protein 8 OS=Homo sapiens OX=9606 GN=AKAP8 PE=1 SV=1	100	0	NP_005849.1	A-kinase anchor protein 8 [Homo sapiens]
P20810	case2-VS-control	0.905496	0.216295	4.18639	8	0.00305281	0.0100845	None	P20810	Calpastatin OS=Homo sapiens OX=9606 GN=CAST PE=1 SV=4	100	0	XP_006714762.1	PREDICTED: calpastatin isoform X5 [Homo sapiens]
Q8IWA4	case2-VS-control	1.00275	0.239795	4.1817	8	0.00307245	0.0101421	Up	Q8IWA4	Mitofusin-1 OS=Homo sapiens OX=9606 GN=MFN1 PE=1 SV=3	100	0	NP_284941.2	mitofusin-1 [Homo sapiens]
Q16629	case2-VS-control	-0.347572	0.0831559	-4.17976	8	0.00308063	0.0101572	None	Q16629	Serine/arginine-rich splicing factor 7 OS=Homo sapiens OX=9606 GN=SRSF7 PE=1 SV=1	100	2e-157	NP_001026854.1	serine/arginine-rich splicing factor 7 isoform 1 [Homo sapiens]
P18754	case2-VS-control	1.89317	0.39655	4.77411	6	0.00308141	0.0101572	Up	P18754	Regulator of chromosome condensation OS=Homo sapiens OX=9606 GN=RCC1 PE=1 SV=1	100	0	NP_001260.1	regulator of chromosome condensation isoform c [Homo sapiens]
P10253	case2-VS-control	-0.783821	0.187632	-4.17744	8	0.00309043	0.0101795	None	P10253	Lysosomal alpha-glucosidase OS=Homo sapiens OX=9606 GN=GAA PE=1 SV=4	100	0	NP_000143.2	lysosomal alpha-glucosidase preproprotein [Homo sapiens]
P29084	case2-VS-control	1.48493	0.278145	5.3387	5	0.00309256	0.0101795	Up	P29084	Transcription initiation factor IIE subunit beta OS=Homo sapiens OX=9606 GN=GTF2E2 PE=1 SV=1	100	0	NP_002086.1	transcription initiation factor IIE subunit beta isoform 1 [Homo sapiens]
Q9C0E2	case2-VS-control	0.676174	0.161929	4.17574	8	0.00309765	0.010189	None	Q9C0E2	Exportin-4 OS=Homo sapiens OX=9606 GN=XPO4 PE=1 SV=2	100	0	NP_071904.4	exportin-4 [Homo sapiens]
P38432	case2-VS-control	0.952565	0.216023	4.40956	7	0.00312048	0.0102568	None	P38432	Coilin OS=Homo sapiens OX=9606 GN=COIL PE=1 SV=1	100	0	NP_004636.1	coilin [Homo sapiens]
Q9Y639	case2-VS-control	-0.522945	0.125439	-4.1689	8	0.0031268	0.0102623	None	Q9Y639	Neuroplastin OS=Homo sapiens OX=9606 GN=NPTN PE=1 SV=2	100	0	NP_036560.1	neuroplastin isoform b precursor [Homo sapiens]
Q9H6R4	case2-VS-control	0.483008	0.115861	4.16886	8	0.00312698	0.0102623	None	Q9H6R4	Nucleolar protein 6 OS=Homo sapiens OX=9606 GN=NOL6 PE=1 SV=2	100	0	NP_075068.2	nucleolar protein 6 alpha isoform [Homo sapiens]
P62249	case2-VS-control	0.866205	0.207801	4.16844	8	0.0031288	0.0102623	None	P62249	40S ribosomal protein S16 OS=Homo sapiens OX=9606 GN=RPS16 PE=1 SV=2	100	3e-102	XP_003915560.1	40S ribosomal protein S16 [Papio anubis]
Q96IZ0	case2-VS-control	-0.766034	0.18381	-4.16753	8	0.00313268	0.0102677	None	Q96IZ0	PRKC apoptosis WT1 regulator protein OS=Homo sapiens OX=9606 GN=PAWR PE=1 SV=1	100	0	NP_002574.2	PRKC apoptosis WT1 regulator protein isoform 1 [Homo sapiens]
Q9NX00	case2-VS-control	1.34197	0.322067	4.16674	8	0.00313607	0.0102716	Up	Q9NX00	Transmembrane protein 160 OS=Homo sapiens OX=9606 GN=TMEM160 PE=1 SV=1	100	7e-128	NP_060324.1	transmembrane protein 160 precursor [Homo sapiens]
P14735	case2-VS-control	0.908625	0.218207	4.16405	8	0.00314766	0.0103022	None	P14735	Insulin-degrading enzyme OS=Homo sapiens OX=9606 GN=IDE PE=1 SV=4	100	0	NP_004960.2	insulin-degrading enzyme isoform 1 [Homo sapiens]
Q9H3Y8	case2-VS-control	0.549511	0.132071	4.16074	8	0.00316202	0.0103412	None	Q9H3Y8	Pancreatic progenitor cell differentiation and proliferation factor OS=Homo sapiens OX=9606 GN=PPDPF PE=1 SV=1	100	1e-76	NP_077275.1	pancreatic progenitor cell differentiation and proliferation factor isoform 1 [Homo sapiens]
Q9H9A7	case2-VS-control	-1.64247	0.258945	-6.34296	4	0.00316404	0.0103412	Down	Q9H9A7	RecQ-mediated genome instability protein 1 OS=Homo sapiens OX=9606 GN=RMI1 PE=1 SV=3	100	0	NP_079221.2	recQ-mediated genome instability protein 1 [Homo sapiens]
Q9GZX9	case2-VS-control	-1.68063	0.265646	-6.32659	4	0.00319441	0.0104331	Down	Q9GZX9	Twisted gastrulation protein homolog 1 OS=Homo sapiens OX=9606 GN=TWSG1 PE=1 SV=1	100	7e-165	NP_065699.1	twisted gastrulation protein homolog 1 precursor [Homo sapiens]
P53396	case2-VS-control	-0.532961	0.12835	-4.15239	8	0.00319846	0.010439	None	P53396	ATP-citrate synthase OS=Homo sapiens OX=9606 GN=ACLY PE=1 SV=3	100	0	BAE06117.1	ACLY variant protein, partial [Homo sapiens]
P12814	case2-VS-control	0.782515	0.188868	4.14318	8	0.0032392	0.0105645	None	P12814	Alpha-actinin-1 OS=Homo sapiens OX=9606 GN=ACTN1 PE=1 SV=2	100	0	NP_001093.1	alpha-actinin-1 isoform b [Homo sapiens]
Q3ZAQ7	case2-VS-control	-1.03884	0.250769	-4.14263	8	0.00324163	0.010565	Down	Q3ZAQ7	Vacuolar ATPase assembly integral membrane protein VMA21 OS=Homo sapiens OX=9606 GN=VMA21 PE=1 SV=1	100	1e-69	EAW99403.1	hypothetical protein LOC203547, isoform CRA_a, partial [Homo sapiens]
P29692	case2-VS-control	-1.04333	0.252021	-4.13985	8	0.00325404	0.010598	Down	P29692	Elongation factor 1-delta OS=Homo sapiens OX=9606 GN=EEF1D PE=1 SV=5	100	0	NP_001951.2	elongation factor 1-delta isoform 2 [Homo sapiens]
P14678	case2-VS-control	-0.308792	0.0746802	-4.13486	8	0.00327648	0.0106541	None	P14678	Small nuclear ribonucleoprotein-associated proteins B and B' OS=Homo sapiens OX=9606 GN=SNRPB PE=1 SV=2	99.583	1e-162	XP_011739653.1	PREDICTED: small nuclear ribonucleoprotein-associated proteins B and B' isoform X1 [Macaca nemestrina]
P00403	case2-VS-control	0.360146	0.0871005	4.13484	8	0.00327656	0.0106541	None	P00403	Cytochrome c oxidase subunit 2 OS=Homo sapiens OX=9606 GN=MT-CO2 PE=1 SV=1	100	2e-166	YP_003024029.1	cytochrome c oxidase subunit II (mitochondrion) [Homo sapiens]
O95716	case2-VS-control	0.825377	0.199633	4.13448	8	0.00327819	0.0106541	None	O95716	Ras-related protein Rab-3D OS=Homo sapiens OX=9606 GN=RAB3D PE=1 SV=1	100	2e-163	NP_004274.1	ras-related protein Rab-3D [Homo sapiens]
O14548	case2-VS-control	1.46912	0.355434	4.13331	8	0.00328346	0.0106638	Up	O14548	Cytochrome c oxidase subunit 7A-related protein, mitochondrial OS=Homo sapiens OX=9606 GN=COX7A2L PE=1 SV=2	100	1e-78	NP_004709.2	cytochrome c oxidase subunit 7A-related protein, mitochondrial isoform a [Homo sapiens]
Q9NRP0	case2-VS-control	0.462245	0.111869	4.132	8	0.00328938	0.0106684	None	Q9NRP0	Oligosaccharyltransferase complex subunit OSTC OS=Homo sapiens OX=9606 GN=OSTC PE=1 SV=1	99.329	6e-105	XP_012421655.1	PREDICTED: oligosaccharyltransferase complex subunit OSTC isoform X1 [Odobenus rosmarus divergens]
Q96JM3	case2-VS-control	-0.86763	0.209979	-4.13197	8	0.00328951	0.0106684	None	Q96JM3	Chromosome alignment-maintaining phosphoprotein 1 OS=Homo sapiens OX=9606 GN=CHAMP1 PE=1 SV=2	100	0	NP_115812.1	chromosome alignment-maintaining phosphoprotein 1 [Homo sapiens]
Q9NXA8	case2-VS-control	0.516565	0.125225	4.1251	8	0.00332078	0.0107623	None	Q9NXA8	NAD-dependent protein deacylase sirtuin-5, mitochondrial OS=Homo sapiens OX=9606 GN=SIRT5 PE=1 SV=2	100	0	NP_036373.1	NAD-dependent protein deacylase sirtuin-5, mitochondrial isoform 1 [Homo sapiens]
O94762	case2-VS-control	-1.1351	0.241661	-4.69708	6	0.00333626	0.0108049	Down	O94762	ATP-dependent DNA helicase Q5 OS=Homo sapiens OX=9606 GN=RECQL5 PE=1 SV=2	100	0	NP_004250.4	ATP-dependent DNA helicase Q5 isoform 1 [Homo sapiens]
Q13443	case2-VS-control	0.931913	0.149541	6.23183	4	0.00337742	0.0109306	None	Q13443	Disintegrin and metalloproteinase domain-containing protein 9 OS=Homo sapiens OX=9606 GN=ADAM9 PE=1 SV=1	100	0	NP_003807.1	disintegrin and metalloproteinase domain-containing protein 9 precursor [Homo sapiens]
Q15131	case2-VS-control	-1.59303	0.340113	-4.68383	6	0.00338245	0.0109392	Down	Q15131	Cyclin-dependent kinase 10 OS=Homo sapiens OX=9606 GN=CDK10 PE=1 SV=1	100	0	NP_443714.3	cyclin-dependent kinase 10 isoform a [Homo sapiens]
Q9BT17	case2-VS-control	2.89433	0.464855	6.22632	4	0.00338846	0.0109455	Up	Q9BT17	Mitochondrial ribosome-associated GTPase 1 OS=Homo sapiens OX=9606 GN=MTG1 PE=1 SV=2	100	0	NP_612393.2	mitochondrial ribosome-associated GTPase 1 [Homo sapiens]
P61081	case2-VS-control	0.957288	0.232898	4.11032	8	0.00338912	0.0109455	None	P61081	NEDD8-conjugating enzyme Ubc12 OS=Homo sapiens OX=9606 GN=UBE2M PE=1 SV=1	100	4e-135	XP_011931728.1	PREDICTED: NEDD8-conjugating enzyme Ubc12 [Cercocebus atys]
Q8NB90	case2-VS-control	1.08302	0.263653	4.10774	8	0.00340123	0.0109769	Up	Q8NB90	ATPase family protein 2 homolog OS=Homo sapiens OX=9606 GN=SPATA5 PE=1 SV=3	100	0	NP_660208.2	spermatogenesis-associated protein 5 isoform 1 [Homo sapiens]
P13995	case2-VS-control	0.763664	0.186298	4.09915	8	0.00344179	0.0111001	None	P13995	Bifunctional methylenetetrahydrofolate dehydrogenase/cyclohydrolase, mitochondrial OS=Homo sapiens OX=9606 GN=MTHFD2 PE=1 SV=2	100	0	NP_006627.2	bifunctional methylenetetrahydrofolate dehydrogenase/cyclohydrolase, mitochondrial precursor [Homo sapiens]
Q12769	case2-VS-control	-0.487874	0.119084	-4.09691	8	0.00345247	0.0111268	None	Q12769	Nuclear pore complex protein Nup160 OS=Homo sapiens OX=9606 GN=NUP160 PE=1 SV=3	100	0	NP_056046.1	nuclear pore complex protein Nup160 isoform 1 [Homo sapiens]
Q86UP2	case2-VS-control	-0.336059	0.0820703	-4.09478	8	0.00346266	0.0111518	None	Q86UP2	Kinectin OS=Homo sapiens OX=9606 GN=KTN1 PE=1 SV=1	100	0	NP_001072989.1	kinectin isoform a [Homo sapiens]
P30153	case2-VS-control	0.76102	0.185897	4.09378	8	0.00346745	0.0111595	None	P30153	Serine/threonine-protein phosphatase 2A 65 kDa regulatory subunit A alpha isoform OS=Homo sapiens OX=9606 GN=PPP2R1A PE=1 SV=4	100	0	NP_055040.2	serine/threonine-protein phosphatase 2A 65 kDa regulatory subunit A alpha isoform [Homo sapiens]
Q9UKD2	case2-VS-control	0.399149	0.0976456	4.08773	8	0.00349654	0.0112453	None	Q9UKD2	mRNA turnover protein 4 homolog OS=Homo sapiens OX=9606 GN=MRTO4 PE=1 SV=2	100	8e-179	NP_057267.2	mRNA turnover protein 4 homolog [Homo sapiens]
Q6P1K2	case2-VS-control	-2.54502	0.151201	-16.832	2	0.00351104	0.0112791	Down	Q6P1K2	Polyamine-modulated factor 1 OS=Homo sapiens OX=9606 GN=PMF1 PE=1 SV=2	100	2e-150	NP_009152.2	polyamine-modulated factor 1 isoform 2 [Homo sapiens]
P35268	case2-VS-control	0.473642	0.115959	4.08456	8	0.00351191	0.0112791	None	P35268	60S ribosomal protein L22 OS=Homo sapiens OX=9606 GN=RPL22 PE=1 SV=2	99.219	1e-89	XP_007978994.1	PREDICTED: 60S ribosomal protein L22 isoform X2 [Chlorocebus sabaeus]
P62851	case2-VS-control	1.26753	0.310908	4.07685	8	0.00354957	0.0113921	Up	P62851	40S ribosomal protein S25 OS=Homo sapiens OX=9606 GN=RPS25 PE=1 SV=1	100	6e-83	NP_001019.1	40S ribosomal protein S25 [Homo sapiens]
O00571	case2-VS-control	0.725022	0.178267	4.06706	8	0.00359807	0.0115397	None	O00571	ATP-dependent RNA helicase DDX3X OS=Homo sapiens OX=9606 GN=DDX3X PE=1 SV=3	100	0	BAD92220.1	DEAD/H (Asp-Glu-Ala-Asp/His) box polypeptide 3 variant, partial [Homo sapiens]
Q7Z7K6	case2-VS-control	-1.27325	0.313109	-4.06647	8	0.00360098	0.0115411	Down	Q7Z7K6	Centromere protein V OS=Homo sapiens OX=9606 GN=CENPV PE=1 SV=1	100	0	Q7Z7K6.1	RecName: Full=Centromere protein V; Short=CENP-V; AltName: Full=Nuclear protein p30; AltName: Full=Proline-rich protein 6
Q9Y2L1	case2-VS-control	0.517641	0.127422	4.06241	8	0.0036213	0.0115975	None	Q9Y2L1	Exosome complex exonuclease RRP44 OS=Homo sapiens OX=9606 GN=DIS3 PE=1 SV=2	100	0	NP_055768.3	exosome complex exonuclease RRP44 isoform a [Homo sapiens]
Q9NRA8	case2-VS-control	1.48246	0.32103	4.61783	6	0.0036236	0.0115975	Up	Q9NRA8	Eukaryotic translation initiation factor 4E transporter OS=Homo sapiens OX=9606 GN=EIF4ENIF1 PE=1 SV=2	100	0	NP_062817.2	eukaryotic translation initiation factor 4E transporter isoform a [Homo sapiens]
P62495	case2-VS-control	0.744675	0.183466	4.05892	8	0.0036389	0.0116347	None	P62495	Eukaryotic peptide chain release factor subunit 1 OS=Homo sapiens OX=9606 GN=ETF1 PE=1 SV=3	99.771	0	XP_003215303.2	PREDICTED: eukaryotic peptide chain release factor subunit 1 [Anolis carolinensis]
Q93084	case2-VS-control	1.39698	0.30281	4.61339	6	0.0036405	0.0116347	Up	Q93084	Sarcoplasmic/endoplasmic reticulum calcium ATPase 3 OS=Homo sapiens OX=9606 GN=ATP2A3 PE=1 SV=2	100	0	NP_777615.1	sarcoplasmic/endoplasmic reticulum calcium ATPase 3 isoform b [Homo sapiens]
Q8NB16	case2-VS-control	-6.32408	1.03587	-6.10512	4	0.00364276	0.0116347	Down	Q8NB16	Mixed lineage kinase domain-like protein OS=Homo sapiens OX=9606 GN=MLKL PE=1 SV=1	100	0	NP_689862.1	mixed lineage kinase domain-like protein isoform 1 [Homo sapiens]
P01116	case2-VS-control	1.1491	0.268477	4.28008	7	0.003655	0.0116657	Up	P01116	GTPase KRas OS=Homo sapiens OX=9606 GN=KRAS PE=1 SV=1	100	2e-138	NP_203524.1	GTPase KRas isoform a [Homo sapiens]
Q9Y673	case2-VS-control	0.961691	0.237154	4.05513	8	0.00365808	0.0116675	None	Q9Y673	Dolichyl-phosphate beta-glucosyltransferase OS=Homo sapiens OX=9606 GN=ALG5 PE=1 SV=1	100	0	NP_037470.1	dolichyl-phosphate beta-glucosyltransferase isoform 1 [Homo sapiens]
Q13618	case2-VS-control	-0.797656	0.196915	-4.05076	8	0.00368034	0.0117233	None	Q13618	Cullin-3 OS=Homo sapiens OX=9606 GN=CUL3 PE=1 SV=2	100	0	NP_003581.1	cullin-3 isoform 1 [Homo sapiens]
P35249	case2-VS-control	-0.332893	0.0821816	-4.0507	8	0.00368064	0.0117233	None	P35249	Replication factor C subunit 4 OS=Homo sapiens OX=9606 GN=RFC4 PE=1 SV=2	100	0	NP_002907.1	replication factor C subunit 4 [Homo sapiens]
P40937	case2-VS-control	-0.271232	0.0669707	-4.05002	8	0.00368413	0.0117264	None	P40937	Replication factor C subunit 5 OS=Homo sapiens OX=9606 GN=RFC5 PE=1 SV=1	100	0	NP_031396.1	replication factor C subunit 5 isoform 1 [Homo sapiens]
Q9Y371	case2-VS-control	0.996767	0.246145	4.04952	8	0.00368667	0.0117264	None	Q9Y371	Endophilin-B1 OS=Homo sapiens OX=9606 GN=SH3GLB1 PE=1 SV=1	100	0	NP_057093.1	endophilin-B1 isoform 1 [Homo sapiens]
P05386	case2-VS-control	0.73598	0.181804	4.0482	8	0.00369344	0.0117378	None	P05386	60S acidic ribosomal protein P1 OS=Homo sapiens OX=9606 GN=RPLP1 PE=1 SV=1	100	4e-75	NP_000994.1	60S acidic ribosomal protein P1 isoform 1 [Homo sapiens]
Q7L0Y3	case2-VS-control	0.558784	0.138045	4.04783	8	0.00369534	0.0117378	None	Q7L0Y3	tRNA methyltransferase 10 homolog C OS=Homo sapiens OX=9606 GN=TRMT10C PE=1 SV=2	100	0	NP_060289.2	mitochondrial ribonuclease P protein 1 precursor [Homo sapiens]
Q8NEB9	case2-VS-control	-1.26106	0.207453	-6.07876	4	0.00370114	0.0117482	Down	Q8NEB9	Phosphatidylinositol 3-kinase catalytic subunit type 3 OS=Homo sapiens OX=9606 GN=PIK3C3 PE=1 SV=1	100	0	NP_002638.2	phosphatidylinositol 3-kinase catalytic subunit type 3 isoform 1 [Homo sapiens]
Q9Y6X3	case2-VS-control	-1.36906	0.338362	-4.04613	8	0.00370405	0.0117494	Down	Q9Y6X3	MAU2 chromatid cohesion factor homolog OS=Homo sapiens OX=9606 GN=MAU2 PE=1 SV=2	100	0	XP_017356856.1	PREDICTED: MAU2 chromatid cohesion factor homolog isoform X1 [Cebus capucinus imitator]
P12931	case2-VS-control	-0.268141	0.0663453	-4.0416	8	0.00372747	0.0118156	None	P12931	Proto-oncogene tyrosine-protein kinase Src OS=Homo sapiens OX=9606 GN=SRC PE=1 SV=3	100	0	NP_005408.1	proto-oncogene tyrosine-protein kinase Src [Homo sapiens]
Q12899	case2-VS-control	0.706996	0.15406	4.58911	6	0.00373455	0.0118299	None	Q12899	Tripartite motif-containing protein 26 OS=Homo sapiens OX=9606 GN=TRIM26 PE=1 SV=1	100	0	NP_003440.1	tripartite motif-containing protein 26 [Homo sapiens]
Q9BQ24	case2-VS-control	1.52269	0.251344	6.05819	4	0.00374749	0.0118628	Up	Q9BQ24	Zinc finger FYVE domain-containing protein 21 OS=Homo sapiens OX=9606 GN=ZFYVE21 PE=1 SV=1	100	1e-175	NP_076976.1	zinc finger FYVE domain-containing protein 21 isoform 2 [Homo sapiens]
O60814	case2-VS-control	1.31576	0.326003	4.03604	8	0.00375638	0.0118828	Up	O60814;P06899;P23527;P33778;P57053;P58876;P62807;Q16778;Q5QNW6;Q8N257;Q93079;Q96A08;Q99877;Q99879;Q99880	Histone H2B type 1-K OS=Homo sapiens OX=9606 GN=HIST1H2BK PE=1 SV=3	100	1e-86	XP_020760090.1	histone H2B type 1-K-like [Odocoileus virginianus texanus]
Q9BTC0	case2-VS-control	-0.449713	0.111491	-4.03363	8	0.00376898	0.0119145	None	Q9BTC0	Death-inducer obliterator 1 OS=Homo sapiens OX=9606 GN=DIDO1 PE=1 SV=5	100	0	NP_149072.2	death-inducer obliterator 1 isoform c [Homo sapiens]
Q2PZI1	case2-VS-control	0.551662	0.136782	4.03313	8	0.00377158	0.0119146	None	Q2PZI1	Probable C-mannosyltransferase DPY19L1 OS=Homo sapiens OX=9606 GN=DPY19L1 PE=2 SV=1	100	0	NP_056098.1	probable C-mannosyltransferase DPY19L1 [Homo sapiens]
Q5T280	case2-VS-control	-0.47268	0.117219	-4.03243	8	0.00377525	0.0119181	None	Q5T280	Putative methyltransferase C9orf114 OS=Homo sapiens OX=9606 GN=SPOUT1 PE=1 SV=3	100	0	NP_057474.2	putative methyltransferase C9orf114 [Homo sapiens]
Q16512	case2-VS-control	-1.52788	0.378948	-4.03191	8	0.00377802	0.0119187	Down	Q16512	Serine/threonine-protein kinase N1 OS=Homo sapiens OX=9606 GN=PKN1 PE=1 SV=2	100	0	NP_002732.3	serine/threonine-protein kinase N1 isoform 2 [Homo sapiens]
Q9NV66	case2-VS-control	-0.56395	0.110734	-5.09281	5	0.00379311	0.0119581	None	Q9NV66	S-adenosyl-L-methionine-dependent tRNA 4-demethylwyosine synthase OS=Homo sapiens OX=9606 GN=TYW1 PE=2 SV=2	100	0	NP_060734.2	S-adenosyl-L-methionine-dependent tRNA 4-demethylwyosine synthase [Homo sapiens]
Q9C0C2	case2-VS-control	-0.781997	0.194174	-4.0273	8	0.00380229	0.0119725	None	Q9C0C2	182 kDa tankyrase-1-binding protein OS=Homo sapiens OX=9606 GN=TNKS1BP1 PE=1 SV=4	100	0	NP_203754.2	182 kDa tankyrase-1-binding protein [Homo sapiens]
Q8N5G0	case2-VS-control	1.23026	0.305496	4.0271	8	0.00380336	0.0119725	Up	Q8N5G0	Small integral membrane protein 20 OS=Homo sapiens OX=9606 GN=SMIM20 PE=1 SV=3	100	6e-43	AAH32431.1	LOC389203 protein, partial [Homo sapiens]
P22033	case2-VS-control	-0.439415	0.109125	-4.02671	8	0.00380542	0.0119725	None	P22033	Methylmalonyl-CoA mutase, mitochondrial OS=Homo sapiens OX=9606 GN=MUT PE=1 SV=4	100	0	NP_000246.2	methylmalonyl-CoA mutase, mitochondrial precursor [Homo sapiens]
Q9UNK0	case2-VS-control	0.32866	0.0719322	4.56903	6	0.00381438	0.0119925	None	Q9UNK0	Syntaxin-8 OS=Homo sapiens OX=9606 GN=STX8 PE=1 SV=2	100	4e-171	NP_004844.1	syntaxin-8 [Homo sapiens]
P21399	case2-VS-control	1.70028	0.422768	4.02179	8	0.00383162	0.0120385	Up	P21399	Cytoplasmic aconitate hydratase OS=Homo sapiens OX=9606 GN=ACO1 PE=1 SV=3	100	0	NP_002188.1	cytoplasmic aconitate hydratase [Homo sapiens]
Q9UBQ5	case2-VS-control	0.597624	0.148622	4.0211	8	0.00383528	0.0120418	None	Q9UBQ5	Eukaryotic translation initiation factor 3 subunit K OS=Homo sapiens OX=9606 GN=EIF3K PE=1 SV=1	100	8e-164	NP_037366.1	eukaryotic translation initiation factor 3 subunit K isoform 1 [Homo sapiens]
Q14126	case2-VS-control	-0.592157	0.147318	-4.01958	8	0.00384341	0.0120592	None	Q14126	Desmoglein-2 OS=Homo sapiens OX=9606 GN=DSG2 PE=1 SV=2	100	0	NP_001934.2	desmoglein-2 preproprotein [Homo sapiens]
Q9H7Z3	case2-VS-control	0.764236	0.180404	4.23625	7	0.00385814	0.0120972	None	Q9H7Z3	Protein NRDE2 homolog OS=Homo sapiens OX=9606 GN=NRDE2 PE=1 SV=3	100	0	NP_060440.2	protein NRDE2 homolog [Homo sapiens]
Q7KZN9	case2-VS-control	0.565294	0.14076	4.016	8	0.0038626	0.012103	None	Q7KZN9	Cytochrome c oxidase assembly protein COX15 homolog OS=Homo sapiens OX=9606 GN=COX15 PE=1 SV=1	100	0	NP_510870.1	cytochrome c oxidase assembly protein COX15 homolog isoform 1 [Homo sapiens]
O43739	case2-VS-control	1.24181	0.244913	5.0704	5	0.00386574	0.0121046	Up	O43739;Q15438;Q99418	Cytohesin-3 OS=Homo sapiens OX=9606 GN=CYTH3 PE=1 SV=2	100	0	XP_009240803.1	PREDICTED: cytohesin-3 [Pongo abelii]
Q86VN1	case2-VS-control	1.7663	0.417595	4.22968	7	0.00388965	0.0121713	Up	Q86VN1	Vacuolar protein-sorting-associated protein 36 OS=Homo sapiens OX=9606 GN=VPS36 PE=1 SV=1	100	0	NP_057159.2	vacuolar protein-sorting-associated protein 36 isoform 1 [Homo sapiens]
Q9Y305	case2-VS-control	0.337793	0.0842311	4.01032	8	0.00389335	0.0121746	None	Q9Y305	Acyl-coenzyme A thioesterase 9, mitochondrial OS=Homo sapiens OX=9606 GN=ACOT9 PE=1 SV=2	100	0	NP_001028755.2	acyl-coenzyme A thioesterase 9, mitochondrial isoform b precursor [Homo sapiens]
P31930	case2-VS-control	-0.458488	0.114359	-4.0092	8	0.00389942	0.0121854	None	P31930	Cytochrome b-c1 complex subunit 1, mitochondrial OS=Homo sapiens OX=9606 GN=UQCRC1 PE=1 SV=3	100	0	NP_003356.2	cytochrome b-c1 complex subunit 1, mitochondrial precursor [Homo sapiens]
Q68CP4	case2-VS-control	1.20339	0.201037	5.98591	4	0.00391612	0.0122275	Up	Q68CP4	Heparan-alpha-glucosaminide N-acetyltransferase OS=Homo sapiens OX=9606 GN=HGSNAT PE=1 SV=2	100	0	Q68CP4.2	RecName: Full=Heparan-alpha-glucosaminide N-acetyltransferase; AltName: Full=Transmembrane protein 76
Q8NFQ8	case2-VS-control	-0.571139	0.14258	-4.00575	8	0.00391819	0.0122275	None	Q8NFQ8	Torsin-1A-interacting protein 2 OS=Homo sapiens OX=9606 GN=TOR1AIP2 PE=1 SV=1	100	0	NP_659471.1	torsin-1A-interacting protein 2 isoform b [Homo sapiens]
Q92947	case2-VS-control	-0.747695	0.186851	-4.00156	8	0.0039412	0.0122861	None	Q92947	Glutaryl-CoA dehydrogenase, mitochondrial OS=Homo sapiens OX=9606 GN=GCDH PE=1 SV=1	100	0	NP_000150.1	glutaryl-CoA dehydrogenase, mitochondrial isoform a precursor [Homo sapiens]
O15127	case2-VS-control	0.512195	0.12801	4.00122	8	0.00394306	0.0122861	None	O15127	Secretory carrier-associated membrane protein 2 OS=Homo sapiens OX=9606 GN=SCAMP2 PE=1 SV=2	100	0	NP_005688.2	secretory carrier-associated membrane protein 2 isoform 2 [Homo sapiens]
O60763	case2-VS-control	1.14084	0.285148	4.00088	8	0.00394493	0.0122861	Up	O60763	General vesicular transport factor p115 OS=Homo sapiens OX=9606 GN=USO1 PE=1 SV=2	100	0	NP_003706.2	general vesicular transport factor p115 isoform 2 [Homo sapiens]
P13569	case2-VS-control	1.09992	0.260872	4.21634	7	0.00395454	0.0123077	Up	P13569	Cystic fibrosis transmembrane conductance regulator OS=Homo sapiens OX=9606 GN=CFTR PE=1 SV=3	100	0	NP_000483.3	cystic fibrosis transmembrane conductance regulator [Homo sapiens]
Q96SB4	case2-VS-control	0.919229	0.229887	3.99862	8	0.0039574	0.0123084	None	Q96SB4	SRSF protein kinase 1 OS=Homo sapiens OX=9606 GN=SRPK1 PE=1 SV=2	100	0	NP_003128.3	SRSF protein kinase 1 [Homo sapiens]
P55061	case2-VS-control	0.865641	0.216568	3.99709	8	0.00396585	0.0123264	None	P55061	Bax inhibitor 1 OS=Homo sapiens OX=9606 GN=TMBIM6 PE=1 SV=2	100	9e-174	NP_003208.2	bax inhibitor 1 isoform 1 [Homo sapiens]
O60524	case2-VS-control	1.31609	0.329315	3.99643	8	0.00396949	0.0123294	Up	O60524	Nuclear export mediator factor NEMF OS=Homo sapiens OX=9606 GN=NEMF PE=1 SV=4	100	0	O60524.4	RecName: Full=Nuclear export mediator factor NEMF; AltName: Full=Antigen NY-CO-1; AltName: Full=Serologically defined colon cancer antigen 1
Q6PD74	case2-VS-control	1.12406	0.188546	5.96173	4	0.00397463	0.0123371	Up	Q6PD74	Alpha- and gamma-adaptin-binding protein p34 OS=Homo sapiens OX=9606 GN=AAGAB PE=1 SV=1	100	0	NP_078942.3	alpha- and gamma-adaptin-binding protein p34 isoform 1 [Homo sapiens]
P54278	case2-VS-control	-1.57303	0.347336	-4.52884	6	0.00398005	0.0123456	Down	P54278	Mismatch repair endonuclease PMS2 OS=Homo sapiens OX=9606 GN=PMS2 PE=1 SV=2	100	0	NP_000526.2	mismatch repair endonuclease PMS2 isoform a [Homo sapiens]
Q9BQQ3	case2-VS-control	-1.30806	0.311206	-4.2032	7	0.00401955	0.0124598	Down	Q9BQQ3	Golgi reassembly-stacking protein 1 OS=Homo sapiens OX=9606 GN=GORASP1 PE=1 SV=3	100	0	NP_114105.1	Golgi reassembly-stacking protein 1 isoform 1 [Homo sapiens]
Q99755	case2-VS-control	-1.47339	0.369642	-3.98599	8	0.00402781	0.0124759	Down	Q99755	Phosphatidylinositol 4-phosphate 5-kinase type-1 alpha OS=Homo sapiens OX=9606 GN=PIP5K1A PE=1 SV=1	100	0	NP_001129110.1	phosphatidylinositol 4-phosphate 5-kinase type-1 alpha isoform 1 [Homo sapiens]
Q96RQ1	case2-VS-control	-0.527327	0.132336	-3.98475	8	0.00403481	0.0124759	None	Q96RQ1	Endoplasmic reticulum-Golgi intermediate compartment protein 2 OS=Homo sapiens OX=9606 GN=ERGIC2 PE=1 SV=2	100	0	NP_057654.2	endoplasmic reticulum-Golgi intermediate compartment protein 2 [Homo sapiens]
P14618	case2-VS-control	1.33844	0.335894	3.98471	8	0.00403504	0.0124759	Up	P14618	Pyruvate kinase PKM OS=Homo sapiens OX=9606 GN=PKM PE=1 SV=4	100	0	XP_018865979.1	PREDICTED: pyruvate kinase PKM isoform X1 [Gorilla gorilla gorilla]
Q01469	case2-VS-control	2.27208	0.570213	3.98462	8	0.00403553	0.0124759	Up	Q01469	Fatty acid-binding protein 5 OS=Homo sapiens OX=9606 GN=FABP5 PE=1 SV=3	100	4e-95	NP_001435.1	fatty acid-binding protein, epidermal [Homo sapiens]
P54578	case2-VS-control	0.915008	0.229708	3.98335	8	0.00404269	0.0124897	None	P54578	Ubiquitin carboxyl-terminal hydrolase 14 OS=Homo sapiens OX=9606 GN=USP14 PE=1 SV=3	100	0	NP_005142.1	ubiquitin carboxyl-terminal hydrolase 14 isoform a [Homo sapiens]
Q15070	case2-VS-control	1.71785	0.431393	3.98209	8	0.00404984	0.0125034	Up	Q15070	Mitochondrial inner membrane protein OXA1L OS=Homo sapiens OX=9606 GN=OXA1L PE=1 SV=3	100	0	AAH01669.2	OXA1L protein, partial [Homo sapiens]
Q9ULL0	case2-VS-control	1.78543	0.356076	5.01417	5	0.00405527	0.0125119	Up	Q9ULL0	Acrosomal protein KIAA1210 OS=Homo sapiens OX=9606 GN=KIAA1210 PE=2 SV=3	100	0	NP_065772.1	acrosomal protein KIAA1210 [Homo sapiens]
Q15006	case2-VS-control	0.45469	0.11426	3.97943	8	0.00406491	0.0125332	None	Q15006	ER membrane protein complex subunit 2 OS=Homo sapiens OX=9606 GN=EMC2 PE=1 SV=1	100	0	NP_055488.1	ER membrane protein complex subunit 2 isoform 2 [Homo sapiens]
Q8N8S7	case2-VS-control	-1.56505	0.393462	-3.97762	8	0.00407521	0.0125566	Down	Q8N8S7	Protein enabled homolog OS=Homo sapiens OX=9606 GN=ENAH PE=1 SV=2	100	0	NP_001008493.1	protein enabled homolog isoform a [Homo sapiens]
Q96MG7	case2-VS-control	1.66674	0.397676	4.19119	7	0.00408	0.0125566	Up	Q96MG7	Non-structural maintenance of chromosomes element 3 homolog OS=Homo sapiens OX=9606 GN=NSMCE3 PE=1 SV=1	100	0	NP_619649.1	non-structural maintenance of chromosomes element 3 homolog [Homo sapiens]
Q12846	case2-VS-control	0.364688	0.0917111	3.97649	8	0.00408169	0.0125566	None	Q12846	Syntaxin-4 OS=Homo sapiens OX=9606 GN=STX4 PE=1 SV=2	100	0	NP_004595.2	syntaxin-4 isoform 3 [Homo sapiens]
Q5T160	case2-VS-control	-0.481996	0.11502	-4.19053	7	0.00408334	0.0125566	None	Q5T160	Probable arginine--tRNA ligase, mitochondrial OS=Homo sapiens OX=9606 GN=RARS2 PE=1 SV=1	100	0	NP_064716.2	probable arginine--tRNA ligase, mitochondrial isoform 1 precursor [Homo sapiens]
O14715	case2-VS-control	0.857322	0.21574	3.97386	8	0.00409675	0.0125866	None	O14715;Q99666	RANBP2-like and GRIP domain-containing protein 8 OS=Homo sapiens OX=9606 GN=RGPD8 PE=1 SV=2	100	0	NP_001157935.1	RANBP2-like and GRIP domain-containing protein 8 [Homo sapiens]
Q9BUL5	case2-VS-control	0.271353	0.0682897	3.97355	8	0.00409853	0.0125866	None	Q9BUL5	PHD finger protein 23 OS=Homo sapiens OX=9606 GN=PHF23 PE=1 SV=1	100	0	NP_077273.2	PHD finger protein 23 isoform 1 [Homo sapiens]
Q99519	case2-VS-control	-1.7846	0.115008	-15.5171	2	0.00412745	0.0126601	Down	Q99519	Sialidase-1 OS=Homo sapiens OX=9606 GN=NEU1 PE=1 SV=1	100	0	NP_000425.1	sialidase-1 precursor [Homo sapiens]
Q8NFC6	case2-VS-control	-0.598619	0.150845	-3.96844	8	0.00412793	0.0126601	None	Q8NFC6	Biorientation of chromosomes in cell division protein 1-like 1 OS=Homo sapiens OX=9606 GN=BOD1L1 PE=1 SV=2	100	0	NP_683692.2	biorientation of chromosomes in cell division protein 1-like 1 [Homo sapiens]
Q96TC7	case2-VS-control	-0.7003	0.176602	-3.96541	8	0.0041455	0.0127055	None	Q96TC7	Regulator of microtubule dynamics protein 3 OS=Homo sapiens OX=9606 GN=RMDN3 PE=1 SV=2	100	0	NP_060615.1	regulator of microtubule dynamics protein 3 isoform 1 [Homo sapiens]
P56962	case2-VS-control	1.59236	0.200393	7.94619	3	0.00415692	0.0127321	Up	P56962	Syntaxin-17 OS=Homo sapiens OX=9606 GN=STX17 PE=1 SV=2	100	0	NP_060389.2	syntaxin-17 [Homo sapiens]
P61163	case2-VS-control	-0.574484	0.144973	-3.96268	8	0.00416136	0.0127373	None	P61163	Alpha-centractin OS=Homo sapiens OX=9606 GN=ACTR1A PE=1 SV=1	100	0	XP_008567934.1	PREDICTED: alpha-centractin isoform X1 [Galeopterus variegatus]
P62277	case2-VS-control	0.972652	0.245565	3.96087	8	0.00417192	0.0127612	None	P62277	40S ribosomal protein S13 OS=Homo sapiens OX=9606 GN=RPS13 PE=1 SV=2	100	7e-106	XP_014703348.1	PREDICTED: 40S ribosomal protein S13 [Equus asinus]
Q99417	case2-VS-control	-0.54158	0.136867	-3.95697	8	0.00419483	0.0128172	None	Q99417	c-Myc-binding protein OS=Homo sapiens OX=9606 GN=MYCBP PE=1 SV=3	100	3e-67	XP_010345873.1	PREDICTED: C-Myc-binding protein [Saimiri boliviensis boliviensis]
P40121	case2-VS-control	2.26498	0.572425	3.95681	8	0.00419577	0.0128172	Up	P40121	Macrophage-capping protein OS=Homo sapiens OX=9606 GN=CAPG PE=1 SV=2	100	0	NP_001738.2	macrophage-capping protein isoform 1 [Homo sapiens]
P29728	case2-VS-control	-2.04241	0.347951	-5.8698	4	0.004207	0.012843	Down	P29728	2'-5'-oligoadenylate synthase 2 OS=Homo sapiens OX=9606 GN=OAS2 PE=1 SV=3	100	0	NP_058197.2	2'-5'-oligoadenylate synthase 2 isoform 1 [Homo sapiens]
P62269	case2-VS-control	0.920919	0.233075	3.95117	8	0.00422907	0.0128962	None	P62269	40S ribosomal protein S18 OS=Homo sapiens OX=9606 GN=RPS18 PE=1 SV=3	100	6e-107	XP_003271942.1	PREDICTED: 40S ribosomal protein S18 [Nomascus leucogenys]
Q9H0U4	case2-VS-control	-0.481261	0.121821	-3.95056	8	0.00423269	0.0128962	None	Q9H0U4	Ras-related protein Rab-1B OS=Homo sapiens OX=9606 GN=RAB1B PE=1 SV=1	100	2e-148	XP_008531408.1	PREDICTED: ras-related protein Rab-1B [Equus przewalskii]
Q9UNE7	case2-VS-control	-0.314918	0.0797151	-3.95054	8	0.0042328	0.0128962	None	Q9UNE7	E3 ubiquitin-protein ligase CHIP OS=Homo sapiens OX=9606 GN=STUB1 PE=1 SV=2	100	0	NP_005852.2	E3 ubiquitin-protein ligase CHIP isoform a [Homo sapiens]
P62314	case2-VS-control	-0.350554	0.0887699	-3.94902	8	0.00424184	0.0129153	None	P62314	Small nuclear ribonucleoprotein Sm D1 OS=Homo sapiens OX=9606 GN=SNRPD1 PE=1 SV=1	100	3e-79	EDL22993.1	mCG14669, isoform CRA_b, partial [Mus musculus]
Q92581	case2-VS-control	-0.61657	0.156167	-3.94815	8	0.00424704	0.0129226	None	Q92581	Sodium/hydrogen exchanger 6 OS=Homo sapiens OX=9606 GN=SLC9A6 PE=1 SV=2	100	0	NP_006350.1	sodium/hydrogen exchanger 6 isoform b precursor [Homo sapiens]
Q16881	case2-VS-control	-1.269	0.321474	-3.94743	8	0.00425133	0.0129272	Down	Q16881	Thioredoxin reductase 1, cytoplasmic OS=Homo sapiens OX=9606 GN=TXNRD1 PE=1 SV=3	100	0	NP_001087240.1	thioredoxin reductase 1, cytoplasmic isoform 5 [Homo sapiens]
Q6DKK2	case2-VS-control	-0.40471	0.0974556	-4.15276	7	0.00428028	0.0130067	None	Q6DKK2	Tetratricopeptide repeat protein 19, mitochondrial OS=Homo sapiens OX=9606 GN=TTC19 PE=1 SV=4	100	0	NP_060245.3	tetratricopeptide repeat protein 19, mitochondrial isoform 1 precursor [Homo sapiens]
Q8NHP8	case2-VS-control	-0.55074	0.139721	-3.94172	8	0.00428552	0.0130067	None	Q8NHP8	Putative phospholipase B-like 2 OS=Homo sapiens OX=9606 GN=PLBD2 PE=1 SV=2	100	0	NP_775813.2	putative phospholipase B-like 2 isoform 1 precursor [Homo sapiens]
Q86V88	case2-VS-control	1.35256	0.231602	5.84	4	0.00428591	0.0130067	Up	Q86V88	Magnesium-dependent phosphatase 1 OS=Homo sapiens OX=9606 GN=MDP1 PE=1 SV=1	100	1e-128	NP_612485.2	magnesium-dependent phosphatase 1 isoform 1 [Homo sapiens]
Q9NWU1	case2-VS-control	1.50075	0.380984	3.93914	8	0.00430112	0.0130443	Up	Q9NWU1	3-oxoacyl-[acyl-carrier-protein] synthase, mitochondrial OS=Homo sapiens OX=9606 GN=OXSM PE=1 SV=1	100	0	NP_060367.1	3-oxoacyl-[acyl-carrier-protein] synthase, mitochondrial isoform 1 precursor [Homo sapiens]
P56537	case2-VS-control	0.436257	0.110817	3.93674	8	0.00431561	0.0130797	None	P56537	Eukaryotic translation initiation factor 6 OS=Homo sapiens OX=9606 GN=EIF6 PE=1 SV=1	100	1e-180	NP_002203.1	eukaryotic translation initiation factor 6 isoform a [Homo sapiens]
P05556	case2-VS-control	-0.267268	0.0679127	-3.93547	8	0.00432331	0.0130944	None	P05556	Integrin beta-1 OS=Homo sapiens OX=9606 GN=ITGB1 PE=1 SV=2	100	0	CAD97649.1	hypothetical protein, partial [Homo sapiens]
P27361	case2-VS-control	1.16602	0.281747	4.13853	7	0.0043572	0.0131884	Up	P27361	Mitogen-activated protein kinase 3 OS=Homo sapiens OX=9606 GN=MAPK3 PE=1 SV=4	100	0	NP_002737.2	mitogen-activated protein kinase 3 isoform 1 [Homo sapiens]
O95297	case2-VS-control	-3.17765	0.406802	-7.8113	3	0.00436771	0.0132116	Down	O95297	Myelin protein zero-like protein 1 OS=Homo sapiens OX=9606 GN=MPZL1 PE=1 SV=1	100	0	NP_003944.1	myelin protein zero-like protein 1 isoform a precursor [Homo sapiens]
P14314	case2-VS-control	-0.464527	0.1183	-3.9267	8	0.00437693	0.0132309	None	P14314	Glucosidase 2 subunit beta OS=Homo sapiens OX=9606 GN=PRKCSH PE=1 SV=2	100	0	NP_002734.2	glucosidase 2 subunit beta isoform 1 precursor [Homo sapiens]
P67812	case2-VS-control	0.447279	0.114015	3.92297	8	0.00439996	0.0132918	None	P67812	Signal peptidase complex catalytic subunit SEC11A OS=Homo sapiens OX=9606 GN=SEC11A PE=1 SV=1	100	7e-128	XP_014444976.1	PREDICTED: signal peptidase complex catalytic subunit SEC11A [Tupaia chinensis]
P11279	case2-VS-control	0.300535	0.0766759	3.91955	8	0.00442118	0.0133472	None	P11279	Lysosome-associated membrane glycoprotein 1 OS=Homo sapiens OX=9606 GN=LAMP1 PE=1 SV=3	100	0	NP_005552.3	lysosome-associated membrane glycoprotein 1 precursor [Homo sapiens]
Q9NXC5	case2-VS-control	1.99558	0.48364	4.12618	7	0.00442515	0.0133504	Up	Q9NXC5	GATOR complex protein MIOS OS=Homo sapiens OX=9606 GN=MIOS PE=1 SV=2	100	0	NP_061878.3	GATOR complex protein MIOS [Homo sapiens]
Q7Z4F1	case2-VS-control	1.62864	0.368121	4.42419	6	0.00445083	0.0134118	Up	Q7Z4F1	Low-density lipoprotein receptor-related protein 10 OS=Homo sapiens OX=9606 GN=LRP10 PE=1 SV=2	100	0	NP_054764.2	low-density lipoprotein receptor-related protein 10 isoform 1 precursor [Homo sapiens]
Q8NBX0	case2-VS-control	0.773673	0.197631	3.91473	8	0.00445128	0.0134118	None	Q8NBX0	Saccharopine dehydrogenase-like oxidoreductase OS=Homo sapiens OX=9606 GN=SCCPDH PE=1 SV=1	100	0	NP_057086.2	saccharopine dehydrogenase-like oxidoreductase [Homo sapiens]
P62753	case2-VS-control	1.05997	0.271026	3.91097	8	0.00447496	0.0134664	Up	P62753	40S ribosomal protein S6 OS=Homo sapiens OX=9606 GN=RPS6 PE=1 SV=1	100	3e-180	NP_033122.1	40S ribosomal protein S6 [Mus musculus]
P63173	case2-VS-control	1.54898	0.396066	3.91092	8	0.00447524	0.0134664	Up	P63173	60S ribosomal protein L38 OS=Homo sapiens OX=9606 GN=RPL38 PE=1 SV=2	100	4e-42	XP_019397857.1	PREDICTED: 60S ribosomal protein L38 isoform X1 [Crocodylus porosus]
P98160	case2-VS-control	1.71701	0.2977	5.76759	4	0.00448528	0.0134879	Up	P98160	Basement membrane-specific heparan sulfate proteoglycan core protein OS=Homo sapiens OX=9606 GN=HSPG2 PE=1 SV=4	100	0	NP_005520.4	basement membrane-specific heparan sulfate proteoglycan core protein isoform b precursor [Homo sapiens]
O43292	case2-VS-control	-0.460089	0.117712	-3.90859	8	0.00448994	0.0134931	None	O43292	Glycosylphosphatidylinositol anchor attachment 1 protein OS=Homo sapiens OX=9606 GN=GPAA1 PE=1 SV=3	100	0	NP_003792.1	glycosylphosphatidylinositol anchor attachment 1 protein [Homo sapiens]
Q05D32	case2-VS-control	-2.24471	0.390144	-5.75354	4	0.00452527	0.0135871	Down	Q05D32	CTD small phosphatase-like protein 2 OS=Homo sapiens OX=9606 GN=CTDSPL2 PE=1 SV=2	100	0	NP_057480.2	CTD small phosphatase-like protein 2 [Homo sapiens]
O75694	case2-VS-control	-0.650107	0.166577	-3.90275	8	0.00452709	0.0135871	None	O75694	Nuclear pore complex protein Nup155 OS=Homo sapiens OX=9606 GN=NUP155 PE=1 SV=1	100	0	NP_705618.1	nuclear pore complex protein Nup155 isoform 1 [Homo sapiens]
Q9BSH4	case2-VS-control	-0.713527	0.182851	-3.90224	8	0.0045303	0.013588	None	Q9BSH4	Translational activator of cytochrome c oxidase 1 OS=Homo sapiens OX=9606 GN=TACO1 PE=1 SV=1	100	0	NP_057444.2	translational activator of cytochrome c oxidase 1 [Homo sapiens]
P09488	case2-VS-control	4.49881	0.921331	4.88294	5	0.00454134	0.0136123	Up	P09488	Glutathione S-transferase Mu 1 OS=Homo sapiens OX=9606 GN=GSTM1 PE=1 SV=3	100	7e-162	NP_000552.2	glutathione S-transferase Mu 1 isoform 1 [Homo sapiens]
P52789	case2-VS-control	0.752888	0.193093	3.8991	8	0.00455043	0.0136307	None	P52789	Hexokinase-2 OS=Homo sapiens OX=9606 GN=HK2 PE=1 SV=2	100	0	NP_000180.2	hexokinase-2 [Homo sapiens]
Q9BUB7	case2-VS-control	0.879343	0.225735	3.89547	8	0.00457375	0.0136917	None	Q9BUB7	Transmembrane protein 70, mitochondrial OS=Homo sapiens OX=9606 GN=TMEM70 PE=1 SV=2	100	0	NP_060336.3	transmembrane protein 70, mitochondrial isoform a [Homo sapiens]
Q96C19	case2-VS-control	-0.50423	0.129492	-3.89392	8	0.00458382	0.013713	None	Q96C19	EF-hand domain-containing protein D2 OS=Homo sapiens OX=9606 GN=EFHD2 PE=1 SV=1	100	1e-171	NP_077305.2	EF-hand domain-containing protein D2 [Homo sapiens]
P62861	case2-VS-control	1.10509	0.283875	3.89288	8	0.00459052	0.0137241	Up	P62861	40S ribosomal protein S30 OS=Homo sapiens OX=9606 GN=FAU PE=1 SV=1	100	2e-34	ABD75367.1	arsenite-resistance protein, partial [Bufo gargarizans]
O43670	case2-VS-control	0.308076	0.0791483	3.89238	8	0.00459375	0.0137249	None	O43670	BUB3-interacting and GLEBS motif-containing protein ZNF207 OS=Homo sapiens OX=9606 GN=ZNF207 PE=1 SV=1	100	0	NP_003448.1	BUB3-interacting and GLEBS motif-containing protein ZNF207 isoform a [Homo sapiens]
Q9BUT1	case2-VS-control	2.25718	0.551322	4.09411	7	0.00460703	0.0137557	Up	Q9BUT1	3-hydroxybutyrate dehydrogenase type 2 OS=Homo sapiens OX=9606 GN=BDH2 PE=1 SV=2	100	0	NP_064524.3	3-hydroxybutyrate dehydrogenase type 2 [Homo sapiens]
P11388	case2-VS-control	0.572826	0.147287	3.88918	8	0.0046146	0.0137694	None	P11388	DNA topoisomerase 2-alpha OS=Homo sapiens OX=9606 GN=TOP2A PE=1 SV=3	100	0	NP_001058.2	DNA topoisomerase 2-alpha [Homo sapiens]
Q9UBQ6	case2-VS-control	-0.831234	0.213956	-3.88507	8	0.00464143	0.0138322	None	Q9UBQ6	Exostosin-like 2 OS=Homo sapiens OX=9606 GN=EXTL2 PE=1 SV=1	100	0	NP_001430.1	exostosin-like 2 isoform 1 [Homo sapiens]
Q9BXW7	case2-VS-control	0.783015	0.201546	3.88504	8	0.0046416	0.0138322	None	Q9BXW7	Haloacid dehalogenase-like hydrolase domain-containing 5 OS=Homo sapiens OX=9606 GN=HDHD5 PE=1 SV=1	100	0	NP_149061.1	haloacid dehalogenase-like hydrolase domain-containing 5 isoform 2 precursor [Homo sapiens]
Q8NC56	case2-VS-control	0.890732	0.22934	3.88389	8	0.00464917	0.0138458	None	Q8NC56	LEM domain-containing protein 2 OS=Homo sapiens OX=9606 GN=LEMD2 PE=1 SV=1	100	0	NP_851853.1	LEM domain-containing protein 2 isoform 1 [Homo sapiens]
Q10588	case2-VS-control	-1.86895	0.128005	-14.6005	2	0.00465821	0.0138536	Down	Q10588	ADP-ribosyl cyclase/cyclic ADP-ribose hydrolase 2 OS=Homo sapiens OX=9606 GN=BST1 PE=1 SV=2	100	0	NP_004325.2	ADP-ribosyl cyclase/cyclic ADP-ribose hydrolase 2 precursor [Homo sapiens]
Q9NWT1	case2-VS-control	0.573364	0.147681	3.88246	8	0.0046586	0.0138536	None	Q9NWT1	p21-activated protein kinase-interacting protein 1 OS=Homo sapiens OX=9606 GN=PAK1IP1 PE=1 SV=2	100	0	NP_060376.2	p21-activated protein kinase-interacting protein 1 [Homo sapiens]
Q8WVM0	case2-VS-control	0.607167	0.156408	3.88195	8	0.00466192	0.0138536	None	Q8WVM0	Dimethyladenosine transferase 1, mitochondrial OS=Homo sapiens OX=9606 GN=TFB1M PE=1 SV=1	100	0	NP_057104.2	dimethyladenosine transferase 1, mitochondrial isoform 1 [Homo sapiens]
O95104	case2-VS-control	0.515829	0.132888	3.88167	8	0.00466376	0.0138536	None	O95104	Splicing factor, arginine/serine-rich 15 OS=Homo sapiens OX=9606 GN=SCAF4 PE=1 SV=3	100	0	NP_065757.1	splicing factor, arginine/serine-rich 15 isoform 1 [Homo sapiens]
Q5SNT2	case2-VS-control	-0.70834	0.182812	-3.87469	8	0.00471002	0.013982	None	Q5SNT2	Transmembrane protein 201 OS=Homo sapiens OX=9606 GN=TMEM201 PE=1 SV=1	100	0	NP_001124396.2	transmembrane protein 201 isoform 1 [Homo sapiens]
Q96GM8	case2-VS-control	-0.273227	0.07053	-3.87391	8	0.00471519	0.0139884	None	Q96GM8	Target of EGR1 protein 1 OS=Homo sapiens OX=9606 GN=TOE1 PE=1 SV=1	100	0	NP_079353.3	target of EGR1 protein 1 [Homo sapiens]
O15042	case2-VS-control	0.385197	0.0995842	3.86805	8	0.00475441	0.0140957	None	O15042	U2 snRNP-associated SURP motif-containing protein OS=Homo sapiens OX=9606 GN=U2SURP PE=1 SV=2	100	0	NP_001073884.1	U2 snRNP-associated SURP motif-containing protein isoform 1 [Homo sapiens]
P48739	case2-VS-control	1.05648	0.273463	3.86336	8	0.00478611	0.0141806	Up	P48739	Phosphatidylinositol transfer protein beta isoform OS=Homo sapiens OX=9606 GN=PITPNB PE=1 SV=2	100	0	NP_036531.1	phosphatidylinositol transfer protein beta isoform isoform 1 [Homo sapiens]
Q14807	case2-VS-control	-0.659992	0.170886	-3.86217	8	0.0047942	0.0141955	None	Q14807	Kinesin-like protein KIF22 OS=Homo sapiens OX=9606 GN=KIF22 PE=1 SV=5	100	0	NP_015556.1	kinesin-like protein KIF22 isoform 1 [Homo sapiens]
Q9NZN4	case2-VS-control	0.749308	0.194133	3.85977	8	0.00481052	0.0142347	None	Q9NZN4	EH domain-containing protein 2 OS=Homo sapiens OX=9606 GN=EHD2 PE=1 SV=2	100	0	NP_055416.2	EH domain-containing protein 2 [Homo sapiens]
Q6XQN6	case2-VS-control	1.94665	0.504451	3.85895	8	0.00481608	0.0142363	Up	Q6XQN6	Nicotinate phosphoribosyltransferase OS=Homo sapiens OX=9606 GN=NAPRT PE=1 SV=2	100	0	NP_660202.3	nicotinate phosphoribosyltransferase isoform 1 [Homo sapiens]
Q92989	case2-VS-control	-0.522327	0.135371	-3.85849	8	0.00481919	0.0142363	None	Q92989	Polyribonucleotide 5'-hydroxyl-kinase Clp1 OS=Homo sapiens OX=9606 GN=CLP1 PE=1 SV=1	100	0	NP_006822.1	polyribonucleotide 5'-hydroxyl-kinase Clp1 isoform 1 [Homo sapiens]
Q7Z3D4	case2-VS-control	-0.847828	0.194883	-4.35044	6	0.00482029	0.0142363	None	Q7Z3D4	LysM and putative peptidoglycan-binding domain-containing protein 3 OS=Homo sapiens OX=9606 GN=LYSMD3 PE=1 SV=2	100	0	NP_938014.1	lysM and putative peptidoglycan-binding domain-containing protein 3 isoform 1 [Homo sapiens]
Q7L2E3	case2-VS-control	0.350571	0.0908845	3.85732	8	0.0048272	0.0142476	None	Q7L2E3	ATP-dependent RNA helicase DHX30 OS=Homo sapiens OX=9606 GN=DHX30 PE=1 SV=1	100	0	NP_619520.1	putative ATP-dependent RNA helicase DHX30 isoform 1 [Homo sapiens]
Q9P0J1	case2-VS-control	-0.488318	0.126626	-3.85637	8	0.00483367	0.0142576	None	Q9P0J1	[Pyruvate dehydrogenase [acetyl-transferring]]-phosphatase 1, mitochondrial OS=Homo sapiens OX=9606 GN=PDP1 PE=1 SV=3	100	0	XP_011515437.1	PREDICTED: pyruvate dehyrogenase phosphatase catalytic subunit 1 isoform X3 [Homo sapiens]
P18084	case2-VS-control	0.614157	0.1593	3.85534	8	0.00484073	0.0142694	None	P18084	Integrin beta-5 OS=Homo sapiens OX=9606 GN=ITGB5 PE=1 SV=1	100	0	NP_002204.2	integrin beta-5 isoform a precursor [Homo sapiens]
Q9H0E2	case2-VS-control	0.835467	0.216768	3.8542	8	0.00484857	0.0142834	None	Q9H0E2	Toll-interacting protein OS=Homo sapiens OX=9606 GN=TOLLIP PE=1 SV=1	100	0	NP_061882.2	toll-interacting protein isoform 1 [Homo sapiens]
Q9UL18	case2-VS-control	0.779279	0.202292	3.85225	8	0.00486199	0.0143138	None	Q9UL18	Protein argonaute-1 OS=Homo sapiens OX=9606 GN=AGO1 PE=1 SV=3	100	0	NP_001304102.1	protein argonaute-1 isoform 1x [Mus musculus]
P49914	case2-VS-control	1.01079	0.262547	3.84995	8	0.00487791	0.0143515	Up	P49914	5-formyltetrahydrofolate cyclo-ligase OS=Homo sapiens OX=9606 GN=MTHFS PE=1 SV=2	100	4e-150	NP_006432.1	5-formyltetrahydrofolate cyclo-ligase isoform a [Homo sapiens]
P47755	case2-VS-control	0.3536	0.0918721	3.84882	8	0.00488566	0.0143652	None	P47755	F-actin-capping protein subunit alpha-2 OS=Homo sapiens OX=9606 GN=CAPZA2 PE=1 SV=3	100	0	NP_006127.1	F-actin-capping protein subunit alpha-2 [Homo sapiens]
P09651	case2-VS-control	0.510892	0.132765	3.84808	8	0.00489082	0.0143713	None	P09651	Heterogeneous nuclear ribonucleoprotein A1 OS=Homo sapiens OX=9606 GN=HNRNPA1 PE=1 SV=5	100	0	NP_112420.1	heterogeneous nuclear ribonucleoprotein A1 isoform b [Homo sapiens]
P11047	case2-VS-control	-0.683317	0.177842	-3.84227	8	0.00493126	0.0144809	None	P11047	Laminin subunit gamma-1 OS=Homo sapiens OX=9606 GN=LAMC1 PE=1 SV=3	100	0	NP_002284.3	laminin subunit gamma-1 precursor [Homo sapiens]
Q7L523	case2-VS-control	0.903819	0.23546	3.83852	8	0.00495761	0.014549	None	Q7L523	Ras-related GTP-binding protein A OS=Homo sapiens OX=9606 GN=RRAGA PE=1 SV=1	100	0	NP_006561.1	ras-related GTP-binding protein A [Homo sapiens]
Q92597	case2-VS-control	1.53321	0.380428	4.03023	7	0.00499432	0.0146475	Up	Q92597	Protein NDRG1 OS=Homo sapiens OX=9606 GN=NDRG1 PE=1 SV=1	100	0	NP_006087.2	protein NDRG1 isoform 1 [Homo sapiens]
A9UHW6	case2-VS-control	-0.966276	0.252175	-3.83176	8	0.0050054	0.0146707	None	A9UHW6	MIF4G domain-containing protein OS=Homo sapiens OX=9606 GN=MIF4GD PE=1 SV=1	100	6e-165	NP_001229430.1	MIF4G domain-containing protein isoform 4 [Homo sapiens]
P11586	case2-VS-control	0.694344	0.18129	3.83002	8	0.0050178	0.0146977	None	P11586	C-1-tetrahydrofolate synthase, cytoplasmic OS=Homo sapiens OX=9606 GN=MTHFD1 PE=1 SV=3	100	0	P11586.3	RecName: Full=C-1-tetrahydrofolate synthase, cytoplasmic; Short=C1-THF synthase; Includes: RecName: Full=Methylenetetrahydrofolate dehydrogenase; Includes: RecName: Full=Methenyltetrahydrofolate cyclohydrolase; Includes: RecName: Full=Formyltetrahydrofolate synthetase; Contains: RecName: Full=C-1-tetrahydrofolate synthase, cytoplasmic, N-terminally processed
Q86UU0	case2-VS-control	1.07695	0.267651	4.02371	7	0.00503583	0.0147412	Up	Q86UU0	B-cell CLL/lymphoma 9-like protein OS=Homo sapiens OX=9606 GN=BCL9L PE=1 SV=1	100	0	XP_016873061.1	PREDICTED: B-cell CLL/lymphoma 9-like protein isoform X1 [Homo sapiens]
Q6DKI1	case2-VS-control	0.477358	0.124772	3.82584	8	0.00504769	0.0147666	None	Q6DKI1	60S ribosomal protein L7-like 1 OS=Homo sapiens OX=9606 GN=RPL7L1 PE=1 SV=1	100	3e-179	NP_940888.3	60S ribosomal protein L7-like 1 [Homo sapiens]
Q9HBH0	case2-VS-control	0.866668	0.215761	4.0168	7	0.00508018	0.0148522	None	Q9HBH0	Rho-related GTP-binding protein RhoF OS=Homo sapiens OX=9606 GN=RHOF PE=1 SV=1	100	8e-157	NP_061907.2	rho-related GTP-binding protein RhoF precursor [Homo sapiens]
Q9Y282	case2-VS-control	-0.517152	0.135359	-3.82059	8	0.00508543	0.0148582	None	Q9Y282	Endoplasmic reticulum-Golgi intermediate compartment protein 3 OS=Homo sapiens OX=9606 GN=ERGIC3 PE=1 SV=1	100	0	NP_057050.1	endoplasmic reticulum-Golgi intermediate compartment protein 3 isoform b [Homo sapiens]
Q9BSJ8	case2-VS-control	-0.309746	0.0812961	-3.8101	8	0.00516189	0.0150721	None	Q9BSJ8	Extended synaptotagmin-1 OS=Homo sapiens OX=9606 GN=ESYT1 PE=1 SV=1	100	0	NP_056107.1	extended synaptotagmin-1 isoform 2 [Homo sapiens]
O75251	case2-VS-control	0.416182	0.109296	3.80786	8	0.00517839	0.0151107	None	O75251	NADH dehydrogenase [ubiquinone] iron-sulfur protein 7, mitochondrial OS=Homo sapiens OX=9606 GN=NDUFS7 PE=1 SV=3	100	4e-155	NP_077718.3	NADH dehydrogenase [ubiquinone] iron-sulfur protein 7, mitochondrial [Homo sapiens]
Q7L014	case2-VS-control	-0.294929	0.077499	-3.80559	8	0.00519515	0.0151501	None	Q7L014	Probable ATP-dependent RNA helicase DDX46 OS=Homo sapiens OX=9606 GN=DDX46 PE=1 SV=2	100	0	NP_055644.2	probable ATP-dependent RNA helicase DDX46 isoform 2 [Homo sapiens]
Q13126	case2-VS-control	2.72655	0.716789	3.80385	8	0.00520806	0.0151702	Up	Q13126	S-methyl-5'-thioadenosine phosphorylase OS=Homo sapiens OX=9606 GN=MTAP PE=1 SV=2	100	0	NP_002442.2	S-methyl-5'-thioadenosine phosphorylase [Homo sapiens]
Q15057	case2-VS-control	-1.69876	0.424991	-3.99717	7	0.00520862	0.0151702	Down	Q15057	Arf-GAP with coiled-coil, ANK repeat and PH domain-containing protein 2 OS=Homo sapiens OX=9606 GN=ACAP2 PE=1 SV=3	100	0	NP_036419.3	arf-GAP with coiled-coil, ANK repeat and PH domain-containing protein 2 [Homo sapiens]
Q9BX95	case2-VS-control	0.955647	0.172885	5.52764	4	0.00523257	0.0152236	None	Q9BX95	Sphingosine-1-phosphate phosphatase 1 OS=Homo sapiens OX=9606 GN=SGPP1 PE=1 SV=2	100	0	NP_110418.1	sphingosine-1-phosphate phosphatase 1 [Homo sapiens]
Q6P179	case2-VS-control	0.891931	0.161379	5.52694	4	0.00523496	0.0152236	None	Q6P179	Endoplasmic reticulum aminopeptidase 2 OS=Homo sapiens OX=9606 GN=ERAP2 PE=1 SV=2	100	0	NP_071745.1	endoplasmic reticulum aminopeptidase 2 isoform 1 [Homo sapiens]
P63010	case2-VS-control	-0.440412	0.115898	-3.79998	8	0.0052368	0.0152236	None	P63010	AP-2 complex subunit beta OS=Homo sapiens OX=9606 GN=AP2B1 PE=1 SV=1	100	0	NP_001273.1	AP-2 complex subunit beta isoform b [Homo sapiens]
Q9H078	case2-VS-control	0.463525	0.122001	3.79936	8	0.00524141	0.0152274	None	Q9H078	Caseinolytic peptidase B protein homolog OS=Homo sapiens OX=9606 GN=CLPB PE=1 SV=1	100	0	NP_110440.1	caseinolytic peptidase B protein homolog isoform 1 [Homo sapiens]
Q9NQG6	case2-VS-control	0.932747	0.127313	7.32642	3	0.00525302	0.0152516	None	Q9NQG6	Mitochondrial dynamics protein MID51 OS=Homo sapiens OX=9606 GN=MIEF1 PE=1 SV=1	100	0	NP_061881.2	mitochondrial dynamics protein MID51 isoform 1 [Homo sapiens]
P46783	case2-VS-control	1.26074	0.332048	3.79685	8	0.00526019	0.0152628	Up	P46783	40S ribosomal protein S10 OS=Homo sapiens OX=9606 GN=RPS10 PE=1 SV=1	100	2e-119	XP_017518592.1	PREDICTED: 40S ribosomal protein S10 [Manis javanica]
Q9NV96	case2-VS-control	0.883812	0.207036	4.26887	6	0.0052696	0.0152805	None	Q9NV96	Cell cycle control protein 50A OS=Homo sapiens OX=9606 GN=TMEM30A PE=1 SV=1	100	0	NP_060717.1	cell cycle control protein 50A isoform 1 [Homo sapiens]
O60762	case2-VS-control	-0.360914	0.0951156	-3.79447	8	0.00527807	0.0152955	None	O60762	Dolichol-phosphate mannosyltransferase subunit 1 OS=Homo sapiens OX=9606 GN=DPM1 PE=1 SV=1	100	0	NP_003850.1	dolichol-phosphate mannosyltransferase subunit 1 isoform 3 [Homo sapiens]
Q9H2U1	case2-VS-control	0.426688	0.112482	3.79339	8	0.00528621	0.0153095	None	Q9H2U1	ATP-dependent DNA/RNA helicase DHX36 OS=Homo sapiens OX=9606 GN=DHX36 PE=1 SV=2	100	0	NP_065916.2	ATP-dependent RNA helicase DHX36 isoform 1 [Homo sapiens]
Q9UNX3	case2-VS-control	0.506024	0.133431	3.79241	8	0.0052936	0.0153213	None	Q9UNX3	60S ribosomal protein L26-like 1 OS=Homo sapiens OX=9606 GN=RPL26L1 PE=1 SV=1	100	2e-100	XP_005265978.1	PREDICTED: 60S ribosomal protein L26-like 1 isoform X1 [Homo sapiens]
Q93063	case2-VS-control	0.684544	0.145414	4.70756	5	0.00530115	0.0153319	None	Q93063	Exostosin-2 OS=Homo sapiens OX=9606 GN=EXT2 PE=1 SV=1	100	0	XP_011518253.1	PREDICTED: exostosin-2 isoform X2 [Homo sapiens]
O43615	case2-VS-control	-0.344501	0.0908725	-3.79104	8	0.00530396	0.0153319	None	O43615	Mitochondrial import inner membrane translocase subunit TIM44 OS=Homo sapiens OX=9606 GN=TIMM44 PE=1 SV=2	100	0	NP_006342.2	mitochondrial import inner membrane translocase subunit TIM44 [Homo sapiens]
P61604	case2-VS-control	-0.470718	0.12418	-3.79061	8	0.00530721	0.0153319	None	P61604	10 kDa heat shock protein, mitochondrial OS=Homo sapiens OX=9606 GN=HSPE1 PE=1 SV=2	100	2e-65	NP_002148.1	10 kDa heat shock protein, mitochondrial [Homo sapiens]
Q86TB9	case2-VS-control	1.21314	0.320219	3.78847	8	0.00532346	0.0153693	Up	Q86TB9	Protein PAT1 homolog 1 OS=Homo sapiens OX=9606 GN=PATL1 PE=1 SV=2	100	0	NP_689929.2	protein PAT1 homolog 1 [Homo sapiens]
O00754	case2-VS-control	0.584476	0.154297	3.788	8	0.00532697	0.0153698	None	O00754	Lysosomal alpha-mannosidase OS=Homo sapiens OX=9606 GN=MAN2B1 PE=1 SV=3	100	0	NP_000519.2	lysosomal alpha-mannosidase isoform 1 precursor [Homo sapiens]
Q5VZK9	case2-VS-control	0.63453	0.167548	3.78716	8	0.00533342	0.0153789	None	Q5VZK9	F-actin-uncapping protein LRRC16A OS=Homo sapiens OX=9606 GN=CARMIL1 PE=1 SV=1	100	0	NP_060110.4	F-actin-uncapping protein LRRC16A isoform 1 [Homo sapiens]
Q12980	case2-VS-control	-4.34198	1.02086	-4.25327	6	0.0053608	0.0154482	Down	Q12980	GATOR complex protein NPRL3 OS=Homo sapiens OX=9606 GN=NPRL3 PE=1 SV=1	100	0	NP_001070818.1	GATOR complex protein NPRL3 isoform 1 [Homo sapiens]
P51553	case2-VS-control	-0.89088	0.235616	-3.78106	8	0.00537999	0.0154929	None	P51553	Isocitrate dehydrogenase [NAD] subunit gamma, mitochondrial OS=Homo sapiens OX=9606 GN=IDH3G PE=1 SV=1	100	0	NP_004126.1	isocitrate dehydrogenase [NAD] subunit gamma, mitochondrial isoform a precursor [Homo sapiens]
P33176	case2-VS-control	0.920105	0.243385	3.78045	8	0.00538467	0.0154929	None	P33176	Kinesin-1 heavy chain OS=Homo sapiens OX=9606 GN=KIF5B PE=1 SV=1	100	0	NP_004512.1	kinesin-1 heavy chain [Homo sapiens]
Q92990	case2-VS-control	2.3369	0.588512	3.97086	7	0.00538637	0.0154929	Up	Q92990	Glomulin OS=Homo sapiens OX=9606 GN=GLMN PE=1 SV=2	100	0	NP_444504.1	glomulin isoform 1 [Homo sapiens]
P84090	case2-VS-control	-0.357741	0.0947412	-3.77598	8	0.00541915	0.0155775	None	P84090	Enhancer of rudimentary homolog OS=Homo sapiens OX=9606 GN=ERH PE=1 SV=1	100	7e-75	XP_004477384.1	PREDICTED: enhancer of rudimentary homolog [Dasypus novemcinctus]
Q15382	case2-VS-control	-0.866139	0.229532	-3.77349	8	0.00543844	0.0156233	None	Q15382	GTP-binding protein Rheb OS=Homo sapiens OX=9606 GN=RHEB PE=1 SV=1	100	9e-134	NP_005605.1	GTP-binding protein Rheb [Homo sapiens]
Q9Y6R0	case2-VS-control	-0.85495	0.215744	-3.96279	7	0.0054422	0.0156244	None	Q9Y6R0	Numb-like protein OS=Homo sapiens OX=9606 GN=NUMBL PE=1 SV=1	100	0	NP_004747.1	numb-like protein isoform a [Homo sapiens]
P50995	case2-VS-control	1.49227	0.395655	3.77165	8	0.00545278	0.0156451	Up	P50995	Annexin A11 OS=Homo sapiens OX=9606 GN=ANXA11 PE=1 SV=1	100	0	NP_001148.1	annexin A11 isoform 1 [Homo sapiens]
Q9P0T7	case2-VS-control	0.599576	0.159066	3.76936	8	0.00547064	0.0156866	None	Q9P0T7	Transmembrane protein 9 OS=Homo sapiens OX=9606 GN=TMEM9 PE=1 SV=1	100	3e-134	NP_057540.1	transmembrane protein 9 isoform a precursor [Homo sapiens]
O76094	case2-VS-control	-0.7514	0.199386	-3.76857	8	0.00547685	0.0156947	None	O76094	Signal recognition particle subunit SRP72 OS=Homo sapiens OX=9606 GN=SRP72 PE=1 SV=3	100	0	NP_008878.3	signal recognition particle subunit SRP72 isoform 1 [Homo sapiens]
P23396	case2-VS-control	1.09396	0.290572	3.76484	8	0.00550612	0.0157688	Up	P23396	40S ribosomal protein S3 OS=Homo sapiens OX=9606 GN=RPS3 PE=1 SV=2	100	2e-176	NP_000996.2	40S ribosomal protein S3 isoform 1 [Homo sapiens]
Q9Y2I7	case2-VS-control	-0.597511	0.158772	-3.76332	8	0.00551807	0.0157932	None	Q9Y2I7	1-phosphatidylinositol 3-phosphate 5-kinase OS=Homo sapiens OX=9606 GN=PIKFYVE PE=1 SV=3	100	0	NP_055855.2	1-phosphatidylinositol 3-phosphate 5-kinase isoform 2 [Homo sapiens]
[truncated: 3,022 more rows]
