# Supplementary material for: WITHDRAWN: Integrative Analysis of the Proteome and Transcriptome in Gastric Cancer Identified Membrane Protein LRP1B as a Potential Biomarker
Source: Research Square preprint supplement (doi:10.21203/rs.3.rs-1280408/v1), 2022-01-26
Supplement: Supplementary file 2 [file 30d01835b197f46a2969c86c.xlsx]

## Sheet: MKN45 vs. GES-1
Protein	Label	log2FC	SE	Tvalue	DF	pvalue	adj_pvalue	Class	ProteinGroup	Description	Nr_Identity	Nr_E-value	Nr_Accession	Nr_Description
P27338	case1-VS-control	5.40927	0.102573	52.7357	8	1.85e-11	6.07e-08	Up	P27338	Amine oxidase [flavin-containing] B OS=Homo sapiens OX=9606 GN=MAOB PE=1 SV=3	100	0	NP_000889.3	amine oxidase [flavin-containing] B [Homo sapiens]
Q13308	case1-VS-control	-2.58833	0.0540457	-47.8916	8	4e-11	6.07e-08	Down	Q13308	Inactive tyrosine-protein kinase 7 OS=Homo sapiens OX=9606 GN=PTK7 PE=1 SV=2	100	0	NP_002812.2	inactive tyrosine-protein kinase 7 isoform a precursor [Homo sapiens]
Q99439	case1-VS-control	-2.56757	0.0514533	-49.901	8	2.88e-11	6.07e-08	Down	Q99439	Calponin-2 OS=Homo sapiens OX=9606 GN=CNN2 PE=1 SV=4	100	0	NP_004359.1	calponin-2 isoform a [Homo sapiens]
P37268	case1-VS-control	-5.1309	0.113531	-45.194	8	6.35e-11	7.23e-08	Down	P37268	Squalene synthase OS=Homo sapiens OX=9606 GN=FDFT1 PE=1 SV=1	100	0	NP_004453.3	squalene synthase isoform 1 [Homo sapiens]
Q96JJ7	case1-VS-control	-2.98244	0.0743091	-40.1356	8	1.63e-10	1.49e-07	Down	Q96JJ7	Protein disulfide-isomerase TMX3 OS=Homo sapiens OX=9606 GN=TMX3 PE=1 SV=2	100	0	NP_061895.3	protein disulfide-isomerase TMX3 isoform 1 precursor [Homo sapiens]
P05023	case1-VS-control	-1.59637	0.0421102	-37.9093	8	2.57e-10	1.7e-07	Down	P05023	Sodium/potassium-transporting ATPase subunit alpha-1 OS=Homo sapiens OX=9606 GN=ATP1A1 PE=1 SV=1	100	0	NP_000692.2	sodium/potassium-transporting ATPase subunit alpha-1 isoform a [Homo sapiens]
P05362	case1-VS-control	-3.2173	0.0886748	-36.282	8	3.65e-10	1.7e-07	Down	P05362	Intercellular adhesion molecule 1 OS=Homo sapiens OX=9606 GN=ICAM1 PE=1 SV=2	100	0	NP_000192.2	intercellular adhesion molecule 1 precursor [Homo sapiens]
P15941	case1-VS-control	3.81502	0.109962	34.694	8	5.21e-10	1.7e-07	Up	P15941	Mucin-1 OS=Homo sapiens OX=9606 GN=MUC1 PE=1 SV=3	100	0	P15941.3	RecName: Full=Mucin-1; Short=MUC-1; AltName: Full=Breast carcinoma-associated antigen DF3; AltName: Full=Cancer antigen 15-3; Short=CA 15-3; AltName: Full=Carcinoma-associated mucin; AltName: Full=Episialin; AltName: Full=H23AG; AltName: Full=Krebs von den Lungen-6; Short=KL-6; AltName: Full=PEMT; AltName: Full=Peanut-reactive urinary mucin; Short=PUM; AltName: Full=Polymorphic epithelial mucin; …
P50895	case1-VS-control	-3.65346	0.105029	-34.7853	8	5.1e-10	1.7e-07	Down	P50895	Basal cell adhesion molecule OS=Homo sapiens OX=9606 GN=BCAM PE=1 SV=2	100	0	NP_005572.2	basal cell adhesion molecule isoform 1 precursor [Homo sapiens]
Q15392	case1-VS-control	-3.3746	0.0934318	-36.1183	8	3.78e-10	1.7e-07	Down	Q15392	Delta(24)-sterol reductase OS=Homo sapiens OX=9606 GN=DHCR24 PE=1 SV=2	100	0	NP_055577.1	delta(24)-sterol reductase precursor [Homo sapiens]
Q15738	case1-VS-control	-2.48022	0.0700542	-35.4043	8	4.43e-10	1.7e-07	Down	Q15738	Sterol-4-alpha-carboxylate 3-dehydrogenase, decarboxylating OS=Homo sapiens OX=9606 GN=NSDHL PE=1 SV=2	100	0	NP_057006.1	sterol-4-alpha-carboxylate 3-dehydrogenase, decarboxylating [Homo sapiens]
Q8NF37	case1-VS-control	-2.00462	0.0576469	-34.7741	8	5.12e-10	1.7e-07	Down	Q8NF37	Lysophosphatidylcholine acyltransferase 1 OS=Homo sapiens OX=9606 GN=LPCAT1 PE=1 SV=2	100	0	NP_079106.3	lysophosphatidylcholine acyltransferase 1 [Homo sapiens]
Q92692	case1-VS-control	-2.82304	0.0756363	-37.3238	8	2.91e-10	1.7e-07	Down	Q92692	Nectin-2 OS=Homo sapiens OX=9606 GN=NECTIN2 PE=1 SV=1	100	0	NP_001036189.1	nectin-2 isoform delta precursor [Homo sapiens]
Q96DB5	case1-VS-control	-2.68621	0.0732455	-36.6741	8	3.35e-10	1.7e-07	Down	Q96DB5	Regulator of microtubule dynamics protein 1 OS=Homo sapiens OX=9606 GN=RMDN1 PE=1 SV=1	100	0	NP_057117.2	regulator of microtubule dynamics protein 1 isoform 1 [Homo sapiens]
O00214	case1-VS-control	-2.8545	0.0853033	-33.463	8	6.94e-10	1.84e-07	Down	O00214	Galectin-8 OS=Homo sapiens OX=9606 GN=LGALS8 PE=1 SV=4	100	0	NP_963837.1	galectin-8 isoform b [Homo sapiens]
P00966	case1-VS-control	8.4296	0.125272	67.2903	6	7.25e-10	1.84e-07	Up	P00966	Argininosuccinate synthase OS=Homo sapiens OX=9606 GN=ASS1 PE=1 SV=2	100	0	NP_446464.1	argininosuccinate synthase [Homo sapiens]
P62736	case1-VS-control	7.5213	0.224454	33.5093	8	6.87e-10	1.84e-07	Up	P62736;P63267	Actin, aortic smooth muscle OS=Homo sapiens OX=9606 GN=ACTA2 PE=1 SV=1	100	0	NP_001604.1	actin, aortic smooth muscle [Homo sapiens]
Q92878	case1-VS-control	-1.41775	0.0421363	-33.6467	8	6.65e-10	1.84e-07	Down	Q92878	DNA repair protein RAD50 OS=Homo sapiens OX=9606 GN=RAD50 PE=1 SV=1	100	0	NP_005723.2	DNA repair protein RAD50 [Homo sapiens]
P61224	case1-VS-control	-1.84673	0.0567524	-32.5402	8	8.67e-10	1.98e-07	Down	P61224	Ras-related protein Rap-1b OS=Homo sapiens OX=9606 GN=RAP1B PE=1 SV=1	100	3e-134	NP_056461.1	ras-related protein Rap-1b isoform 1 precursor [Homo sapiens]
Q99470	case1-VS-control	-3.53055	0.109186	-32.3351	8	9.12e-10	1.98e-07	Down	Q99470	Stromal cell-derived factor 2 OS=Homo sapiens OX=9606 GN=SDF2 PE=1 SV=2	100	8e-156	NP_008854.2	stromal cell-derived factor 2 precursor [Homo sapiens]
Q9Y5L4	case1-VS-control	-1.92419	0.0593315	-32.4312	8	8.91e-10	1.98e-07	Down	Q9Y5L4	Mitochondrial import inner membrane translocase subunit Tim13 OS=Homo sapiens OX=9606 GN=TIMM13 PE=1 SV=1	100	2e-65	NP_036590.1	mitochondrial import inner membrane translocase subunit Tim13 [Homo sapiens]
P51809	case1-VS-control	-2.89012	0.0911424	-31.7099	8	1.06e-09	2.11e-07	Down	P51809	Vesicle-associated membrane protein 7 OS=Homo sapiens OX=9606 GN=VAMP7 PE=1 SV=3	100	1e-164	NP_005629.1	vesicle-associated membrane protein 7 isoform 1 [Homo sapiens]
Q86VR2	case1-VS-control	-2.40604	0.0756378	-31.81	8	1.04e-09	2.11e-07	Down	Q86VR2	Reticulophagy regulator 3 OS=Homo sapiens OX=9606 GN=RETREG3 PE=1 SV=1	100	0	NP_835227.1	reticulophagy regulator 3 [Homo sapiens]
P06280	case1-VS-control	-2.01845	0.0645472	-31.2709	8	1.19e-09	2.12e-07	Down	P06280	Alpha-galactosidase A OS=Homo sapiens OX=9606 GN=GLA PE=1 SV=1	100	0	NP_000160.1	alpha-galactosidase A precursor [Homo sapiens]
Q03252	case1-VS-control	-3.35193	0.107405	-31.2085	8	1.21e-09	2.12e-07	Down	Q03252	Lamin-B2 OS=Homo sapiens OX=9606 GN=LMNB2 PE=1 SV=4	100	0	NP_116126.3	lamin-B2 [Homo sapiens]
Q14249	case1-VS-control	-3.61421	0.114891	-31.4578	8	1.13e-09	2.12e-07	Down	Q14249	Endonuclease G, mitochondrial OS=Homo sapiens OX=9606 GN=ENDOG PE=1 SV=4	100	0	NP_004426.2	endonuclease G, mitochondrial precursor [Homo sapiens]
Q92930	case1-VS-control	-3.54366	0.115651	-30.6409	8	1.4e-09	2.36e-07	Down	Q92930	Ras-related protein Rab-8B OS=Homo sapiens OX=9606 GN=RAB8B PE=1 SV=2	100	4e-151	XP_009427575.2	PREDICTED: ras-related protein Rab-8B isoform X1 [Pan troglodytes]
Q9NVD7	case1-VS-control	-2.46732	0.0810435	-30.4444	8	1.47e-09	2.4e-07	Down	Q9NVD7	Alpha-parvin OS=Homo sapiens OX=9606 GN=PARVA PE=1 SV=1	100	0	XP_010975567.1	PREDICTED: alpha-parvin [Camelus dromedarius]
Q8IV08	case1-VS-control	-2.49953	0.083149	-30.0608	8	1.63e-09	2.47e-07	Down	Q8IV08	Phospholipase D3 OS=Homo sapiens OX=9606 GN=PLD3 PE=1 SV=1	100	0	NP_001026866.1	phospholipase D3 [Homo sapiens]
Q9BTT6	case1-VS-control	-2.65577	0.0882012	-30.1103	8	1.61e-09	2.47e-07	Down	Q9BTT6	Leucine-rich repeat-containing protein 1 OS=Homo sapiens OX=9606 GN=LRRC1 PE=1 SV=1	100	0	NP_060684.4	leucine-rich repeat-containing protein 1 [Homo sapiens]
Q96HW7	case1-VS-control	-2.00583	0.0675695	-29.6855	8	1.8e-09	2.64e-07	Down	Q96HW7	Integrator complex subunit 4 OS=Homo sapiens OX=9606 GN=INTS4 PE=1 SV=2	99.896	0	BAF83555.1	unnamed protein product [Homo sapiens]
Q9BRR6	case1-VS-control	-3.40985	0.119598	-28.5108	8	2.48e-09	3.53e-07	Down	Q9BRR6	ADP-dependent glucokinase OS=Homo sapiens OX=9606 GN=ADPGK PE=1 SV=1	100	0	XP_003818615.1	PREDICTED: ADP-dependent glucokinase isoform X1 [Pan paniscus]
P29590	case1-VS-control	-2.38057	0.0854418	-27.8619	8	2.97e-09	4.11e-07	Down	P29590	Protein PML OS=Homo sapiens OX=9606 GN=PML PE=1 SV=3	100	0	NP_150241.2	protein PML isoform 1 [Homo sapiens]
Q9NXF1	case1-VS-control	-2.39882	0.0864471	-27.749	8	3.07e-09	4.12e-07	Down	Q9NXF1	Testis-expressed protein 10 OS=Homo sapiens OX=9606 GN=TEX10 PE=1 SV=2	100	0	NP_060216.2	testis-expressed protein 10 isoform 1 [Homo sapiens]
Q9NU22	case1-VS-control	-1.01977	0.0371816	-27.4268	8	3.37e-09	4.39e-07	Down	Q9NU22	Midasin OS=Homo sapiens OX=9606 GN=MDN1 PE=1 SV=2	100	0	NP_055426.1	midasin [Homo sapiens]
P68366	case1-VS-control	3.62576	0.101551	35.7038	7	3.51e-09	4.45e-07	Up	P68366	Tubulin alpha-4A chain OS=Homo sapiens OX=9606 GN=TUBA4A PE=1 SV=1	100	0	NP_033473.1	tubulin alpha-4A chain isoform 1 [Mus musculus]
P05187	case1-VS-control	8.32941	0.168048	49.5657	6	4.52e-09	4.72e-07	Up	P05187	Alkaline phosphatase, placental type OS=Homo sapiens OX=9606 GN=ALPP PE=1 SV=2	100	0	NP_001623.3	alkaline phosphatase, placental type preproprotein [Homo sapiens]
P07947	case1-VS-control	-1.91479	0.0724103	-26.4436	8	4.5e-09	4.72e-07	Down	P07947	Tyrosine-protein kinase Yes OS=Homo sapiens OX=9606 GN=YES1 PE=1 SV=3	100	0	XP_018869430.1	PREDICTED: tyrosine-protein kinase Yes [Gorilla gorilla gorilla]
P10301	case1-VS-control	-1.38663	0.0520588	-26.6359	8	4.25e-09	4.72e-07	Down	P10301	Ras-related protein R-Ras OS=Homo sapiens OX=9606 GN=RRAS PE=1 SV=1	100	2e-158	NP_006261.1	ras-related protein R-Ras [Homo sapiens]
P11717	case1-VS-control	-2.10829	0.0801055	-26.3189	8	4.67e-09	4.72e-07	Down	P11717	Cation-independent mannose-6-phosphate receptor OS=Homo sapiens OX=9606 GN=IGF2R PE=1 SV=3	100	0	P11717.3	RecName: Full=Cation-independent mannose-6-phosphate receptor; Short=CI Man-6-P receptor; Short=CI-MPR; Short=M6PR; AltName: Full=300 kDa mannose 6-phosphate receptor; Short=MPR 300; AltName: Full=Insulin-like growth factor 2 receptor; AltName: Full=Insulin-like growth factor II receptor; Short=IGF-II receptor; AltName: Full=M6P/IGF2 receptor; Short=M6P/IGF2R; AltName: CD_antigen=CD222; Flags: Pr…
Q08722	case1-VS-control	-1.39136	0.052293	-26.6069	8	4.28e-09	4.72e-07	Down	Q08722	Leukocyte surface antigen CD47 OS=Homo sapiens OX=9606 GN=CD47 PE=1 SV=1	100	0	NP_001768.1	leukocyte surface antigen CD47 isoform 1 precursor [Homo sapiens]
Q16719	case1-VS-control	4.61968	0.135158	34.1799	7	4.76e-09	4.72e-07	Up	Q16719	Kynureninase OS=Homo sapiens OX=9606 GN=KYNU PE=1 SV=1	100	0	NP_003928.1	kynureninase isoform a [Homo sapiens]
Q6UX01	case1-VS-control	-2.31706	0.087918	-26.3548	8	4.62e-09	4.72e-07	Down	Q6UX01;Q8WVP7	Protein LMBR1L OS=Homo sapiens OX=9606 GN=LMBR1L PE=1 SV=2	100	0	NP_060583.2	protein LMBR1L isoform 1 [Homo sapiens]
Q96CN7	case1-VS-control	1.68042	0.0638298	26.3266	8	4.66e-09	4.72e-07	Up	Q96CN7	Isochorismatase domain-containing protein 1 OS=Homo sapiens OX=9606 GN=ISOC1 PE=1 SV=3	100	0	NP_057132.2	isochorismatase domain-containing protein 1 [Homo sapiens]
Q9NUP9	case1-VS-control	-1.86854	0.0697239	-26.7991	8	4.05e-09	4.72e-07	Down	Q9NUP9	Protein lin-7 homolog C OS=Homo sapiens OX=9606 GN=LIN7C PE=1 SV=1	100	8e-142	NP_035829.1	protein lin-7 homolog C [Mus musculus]
Q9Y4L1	case1-VS-control	-2.56256	0.0963001	-26.6102	8	4.28e-09	4.72e-07	Down	Q9Y4L1	Hypoxia up-regulated protein 1 OS=Homo sapiens OX=9606 GN=HYOU1 PE=1 SV=1	100	0	NP_006380.1	hypoxia up-regulated protein 1 precursor [Homo sapiens]
O00469	case1-VS-control	-3.80098	0.0777375	-48.895	6	4.91e-09	4.76e-07	Down	O00469	Procollagen-lysine,2-oxoglutarate 5-dioxygenase 2 OS=Homo sapiens OX=9606 GN=PLOD2 PE=1 SV=2	100	0	BAD93116.1	procollagen-lysine, 2-oxoglutarate 5-dioxygenase 2 isoform b variant, partial [Homo sapiens]
Q96FQ6	case1-VS-control	3.62541	0.139432	26.0013	8	5.14e-09	4.88e-07	Up	Q96FQ6	Protein S100-A16 OS=Homo sapiens OX=9606 GN=S100A16 PE=1 SV=1	100	2e-71	NP_525127.1	protein S100-A16 [Homo sapiens]
P26006	case1-VS-control	-2.55855	0.10069	-25.4101	8	6.16e-09	5.74e-07	Down	P26006	Integrin alpha-3 OS=Homo sapiens OX=9606 GN=ITGA3 PE=1 SV=5	100	0	NP_002195.1	integrin alpha-3 preproprotein [Homo sapiens]
O15162	case1-VS-control	-3.60366	0.145598	-24.7507	8	7.59e-09	6.29e-07	Down	O15162	Phospholipid scramblase 1 OS=Homo sapiens OX=9606 GN=PLSCR1 PE=1 SV=1	100	0	NP_066928.1	phospholipid scramblase 1 [Homo sapiens]
O15270	case1-VS-control	-2.45718	0.098897	-24.8458	8	7.36e-09	6.29e-07	Down	O15270	Serine palmitoyltransferase 2 OS=Homo sapiens OX=9606 GN=SPTLC2 PE=1 SV=1	100	0	NP_004854.1	serine palmitoyltransferase 2 [Homo sapiens]
P48735	case1-VS-control	-1.82889	0.0737293	-24.8055	8	7.46e-09	6.29e-07	Down	P48735	Isocitrate dehydrogenase [NADP], mitochondrial OS=Homo sapiens OX=9606 GN=IDH2 PE=1 SV=2	100	0	NP_002159.2	isocitrate dehydrogenase [NADP], mitochondrial isoform 1 precursor [Homo sapiens]
Q53H96	case1-VS-control	2.53215	0.101374	24.9783	8	7.06e-09	6.29e-07	Up	Q53H96	Pyrroline-5-carboxylate reductase 3 OS=Homo sapiens OX=9606 GN=PYCR3 PE=1 SV=3	100	0	Q53H96.3	RecName: Full=Pyrroline-5-carboxylate reductase 3; Short=P5C reductase 3; Short=P5CR 3; AltName: Full=Pyrroline-5-carboxylate reductase-like protein
Q969E2	case1-VS-control	-2.51922	0.101125	-24.9119	8	7.21e-09	6.29e-07	Down	Q969E2	Secretory carrier-associated membrane protein 4 OS=Homo sapiens OX=9606 GN=SCAMP4 PE=1 SV=1	100	7e-168	NP_524558.1	secretory carrier-associated membrane protein 4 isoform 1 [Homo sapiens]
Q9UBG0	case1-VS-control	-5.40012	0.118473	-45.581	6	7.47e-09	6.29e-07	Down	Q9UBG0	C-type mannose receptor 2 OS=Homo sapiens OX=9606 GN=MRC2 PE=1 SV=2	100	0	NP_006030.2	C-type mannose receptor 2 precursor [Homo sapiens]
P78347	case1-VS-control	-4.00176	0.162131	-24.6823	8	7.76e-09	6.32e-07	Down	P78347	General transcription factor II-I OS=Homo sapiens OX=9606 GN=GTF2I PE=1 SV=2	100	0	NP_127492.1	general transcription factor II-I isoform 1 [Homo sapiens]
P08236	case1-VS-control	-2.14157	0.0872295	-24.551	8	8.09e-09	6.47e-07	Down	P08236	Beta-glucuronidase OS=Homo sapiens OX=9606 GN=GUSB PE=1 SV=2	100	0	NP_000172.2	beta-glucuronidase isoform 1 precursor [Homo sapiens]
P27144	case1-VS-control	-2.59771	0.106051	-24.4949	8	8.24e-09	6.48e-07	Down	P27144	Adenylate kinase 4, mitochondrial OS=Homo sapiens OX=9606 GN=AK4 PE=1 SV=1	100	2e-166	NP_037542.1	adenylate kinase 4, mitochondrial isoform a [Homo sapiens]
P35611	case1-VS-control	-2.72901	0.0868404	-31.4255	7	8.54e-09	6.49e-07	Down	P35611	Alpha-adducin OS=Homo sapiens OX=9606 GN=ADD1 PE=1 SV=2	100	0	NP_001110.2	alpha-adducin isoform a [Homo sapiens]
Q7Z4H8	case1-VS-control	-2.31635	0.0949229	-24.4024	8	8.49e-09	6.49e-07	Down	Q7Z4H8	KDEL motif-containing protein 2 OS=Homo sapiens OX=9606 GN=KDELC2 PE=1 SV=2	100	0	NP_714916.3	KDEL motif-containing protein 2 precursor [Homo sapiens]
Q8TB03	case1-VS-control	4.24692	0.0958187	44.3225	6	8.83e-09	6.6e-07	Up	Q8TB03	Uncharacterized protein CXorf38 OS=Homo sapiens OX=9606 GN=CXorf38 PE=1 SV=1	100	0	NP_659407.1	uncharacterized protein CXorf38 isoform 1 [Homo sapiens]
O15460	case1-VS-control	-3.55437	0.147995	-24.0168	8	9.63e-09	6.97e-07	Down	O15460	Prolyl 4-hydroxylase subunit alpha-2 OS=Homo sapiens OX=9606 GN=P4HA2 PE=1 SV=1	100	0	NP_004190.1	prolyl 4-hydroxylase subunit alpha-2 isoform 1 precursor [Homo sapiens]
Q9NP72	case1-VS-control	-2.44922	0.101903	-24.0349	8	9.57e-09	6.97e-07	Down	Q9NP72	Ras-related protein Rab-18 OS=Homo sapiens OX=9606 GN=RAB18 PE=1 SV=1	100	7e-151	NP_067075.1	ras-related protein Rab-18 isoform 1 [Homo sapiens]
Q9UBR2	case1-VS-control	-1.55149	0.0647449	-23.9631	8	9.8e-09	6.98e-07	Down	Q9UBR2	Cathepsin Z OS=Homo sapiens OX=9606 GN=CTSZ PE=1 SV=1	100	0	NP_001327.2	cathepsin Z preproprotein [Homo sapiens]
P07942	case1-VS-control	-3.89101	0.164391	-23.6693	8	1.08e-08	7.58e-07	Down	P07942	Laminin subunit beta-1 OS=Homo sapiens OX=9606 GN=LAMB1 PE=1 SV=2	100	0	NP_002282.2	laminin subunit beta-1 precursor [Homo sapiens]
Q8TBA6	case1-VS-control	-1.92841	0.082314	-23.4274	8	1.17e-08	8.09e-07	Down	Q8TBA6	Golgin subfamily A member 5 OS=Homo sapiens OX=9606 GN=GOLGA5 PE=1 SV=3	100	0	Q8TBA6.3	RecName: Full=Golgin subfamily A member 5; AltName: Full=Cell proliferation-inducing gene 31 protein; AltName: Full=Golgin-84; AltName: Full=Protein Ret-II; AltName: Full=RET-fused gene 5 protein
P48449	case1-VS-control	-3.10904	0.133756	-23.2442	8	1.25e-08	8.36e-07	Down	P48449	Lanosterol synthase OS=Homo sapiens OX=9606 GN=LSS PE=1 SV=1	100	0	NP_002331.3	lanosterol synthase isoform 1 [Homo sapiens]
Q96PZ0	case1-VS-control	2.74948	0.0923245	29.7806	7	1.24e-08	8.36e-07	Up	Q96PZ0	Pseudouridylate synthase 7 homolog OS=Homo sapiens OX=9606 GN=PUS7 PE=1 SV=2	100	0	NP_061915.2	pseudouridylate synthase 7 homolog isoform b [Homo sapiens]
P12277	case1-VS-control	4.83191	0.116197	41.5838	6	1.29e-08	8.43e-07	Up	P12277	Creatine kinase B-type OS=Homo sapiens OX=9606 GN=CKB PE=1 SV=1	100	0	NP_001814.2	creatine kinase B-type [Homo sapiens]
P29992	case1-VS-control	-2.35622	0.102249	-23.0438	8	1.33e-08	8.43e-07	Down	P29992	Guanine nucleotide-binding protein subunit alpha-11 OS=Homo sapiens OX=9606 GN=GNA11 PE=1 SV=2	100	0	NP_002058.2	guanine nucleotide-binding protein subunit alpha-11 [Homo sapiens]
P51148	case1-VS-control	-1.84957	0.080189	-23.0652	8	1.33e-08	8.43e-07	Down	P51148	Ras-related protein Rab-5C OS=Homo sapiens OX=9606 GN=RAB5C PE=1 SV=2	100	2e-161	NP_004574.2	ras-related protein Rab-5C isoform a [Homo sapiens]
Q96GZ6	case1-VS-control	-2.34061	0.101096	-23.1523	8	1.29e-08	8.43e-07	Down	Q96GZ6	Solute carrier family 41 member 3 OS=Homo sapiens OX=9606 GN=SLC41A3 PE=1 SV=2	100	0	XP_005247619.1	PREDICTED: solute carrier family 41 member 3 isoform X2 [Homo sapiens]
Q9NR28	case1-VS-control	-2.07308	0.0901149	-23.0049	8	1.35e-08	8.43e-07	Down	Q9NR28	Diablo homolog, mitochondrial OS=Homo sapiens OX=9606 GN=DIABLO PE=1 SV=1	100	1e-175	NP_063940.1	diablo homolog, mitochondrial isoform 1 precursor [Homo sapiens]
Q9NZW5	case1-VS-control	-3.54585	0.0860656	-41.1993	6	1.37e-08	8.43e-07	Down	Q9NZW5	MAGUK p55 subfamily member 6 OS=Homo sapiens OX=9606 GN=MPP6 PE=1 SV=2	100	0	XP_011729487.1	PREDICTED: MAGUK p55 subfamily member 6 isoform X3 [Macaca nemestrina]
P30038	case1-VS-control	-3.03811	0.133074	-22.8301	8	1.44e-08	8.51e-07	Down	P30038	Delta-1-pyrroline-5-carboxylate dehydrogenase, mitochondrial OS=Homo sapiens OX=9606 GN=ALDH4A1 PE=1 SV=3	100	0	NP_003739.2	delta-1-pyrroline-5-carboxylate dehydrogenase, mitochondrial isoform a precursor [Homo sapiens]
Q9BXP2	case1-VS-control	-1.72179	0.0753218	-22.8591	8	1.42e-08	8.51e-07	Down	Q9BXP2	Solute carrier family 12 member 9 OS=Homo sapiens OX=9606 GN=SLC12A9 PE=1 SV=1	100	0	NP_064631.2	solute carrier family 12 member 9 isoform 1 [Homo sapiens]
Q9Y6N5	case1-VS-control	1.78393	0.0779188	22.8948	8	1.4e-08	8.51e-07	Up	Q9Y6N5	Sulfide:quinone oxidoreductase, mitochondrial OS=Homo sapiens OX=9606 GN=SQOR PE=1 SV=1	100	0	NP_067022.1	sulfide:quinone oxidoreductase, mitochondrial [Homo sapiens]
P63092	case1-VS-control	-1.85004	0.0813023	-22.755	8	1.47e-08	8.62e-07	Down	P63092;Q5JWF2	Guanine nucleotide-binding protein G(s) subunit alpha isoforms short OS=Homo sapiens OX=9606 GN=GNAS PE=1 SV=1	100	0	NP_000507.1	protein GNAS isoform GNASL [Homo sapiens]
P26885	case1-VS-control	-1.69029	0.0748012	-22.5971	8	1.56e-08	8.95e-07	Down	P26885	Peptidyl-prolyl cis-trans isomerase FKBP2 OS=Homo sapiens OX=9606 GN=FKBP2 PE=1 SV=2	100	8e-100	NP_004461.2	peptidyl-prolyl cis-trans isomerase FKBP2 precursor [Homo sapiens]
Q9NYK5	case1-VS-control	-1.40948	0.0624409	-22.5731	8	1.57e-08	8.95e-07	Down	Q9NYK5	39S ribosomal protein L39, mitochondrial OS=Homo sapiens OX=9606 GN=MRPL39 PE=1 SV=3	100	0	Q9NYK5.3	RecName: Full=39S ribosomal protein L39, mitochondrial; Short=L39mt; Short=MRP-L39; AltName: Full=39S ribosomal protein L5, mitochondrial; Short=L5mt; Short=MRP-L5; AltName: Full=Mitochondrial large ribosomal subunit protein mL39
P13797	case1-VS-control	4.58321	0.204236	22.4407	8	1.65e-08	9.26e-07	Up	P13797	Plastin-3 OS=Homo sapiens OX=9606 GN=PLS3 PE=1 SV=4	100	0	NP_005023.2	plastin-3 isoform 1 [Homo sapiens]
O95208	case1-VS-control	-2.64272	0.11805	-22.3864	8	1.68e-08	9.33e-07	Down	O95208	Epsin-2 OS=Homo sapiens OX=9606 GN=EPN2 PE=1 SV=3	100	0	NP_055779.2	epsin-2 isoform b [Homo sapiens]
Q8WWI1	case1-VS-control	3.24524	0.145847	22.2509	8	1.76e-08	9.67e-07	Up	Q8WWI1	LIM domain only protein 7 OS=Homo sapiens OX=9606 GN=LMO7 PE=1 SV=3	100	0	Q8WWI1.3	RecName: Full=LIM domain only protein 7; Short=LMO-7; AltName: Full=F-box only protein 20; AltName: Full=LOMP
Q16401	case1-VS-control	2.49494	0.06359	39.2348	6	1.83e-08	9.94e-07	Up	Q16401	26S proteasome non-ATPase regulatory subunit 5 OS=Homo sapiens OX=9606 GN=PSMD5 PE=1 SV=3	100	0	NP_005038.1	26S proteasome non-ATPase regulatory subunit 5 isoform 1 [Homo sapiens]
P11279	case1-VS-control	-1.69162	0.0766759	-22.0619	8	1.88e-08	1.01e-06	Down	P11279	Lysosome-associated membrane glycoprotein 1 OS=Homo sapiens OX=9606 GN=LAMP1 PE=1 SV=3	100	0	NP_005552.3	lysosome-associated membrane glycoprotein 1 precursor [Homo sapiens]
Q8IY95	case1-VS-control	-1.82217	0.0827177	-22.0288	8	1.9e-08	1.01e-06	Down	Q8IY95	Transmembrane protein 192 OS=Homo sapiens OX=9606 GN=TMEM192 PE=1 SV=1	100	0	NP_001093859.1	transmembrane protein 192 [Homo sapiens]
Q99497	case1-VS-control	2.13467	0.0974169	21.9127	8	1.99e-08	1.04e-06	Up	Q99497	Protein/nucleic acid deglycase DJ-1 OS=Homo sapiens OX=9606 GN=PARK7 PE=1 SV=2	100	1e-134	NP_009193.2	protein DJ-1 [Homo sapiens]
O15269	case1-VS-control	-2.47365	0.1136	-21.7751	8	2.09e-08	1.05e-06	Down	O15269	Serine palmitoyltransferase 1 OS=Homo sapiens OX=9606 GN=SPTLC1 PE=1 SV=1	100	0	NP_006406.1	serine palmitoyltransferase 1 isoform a [Homo sapiens]
Q5JRX3	case1-VS-control	-2.01713	0.0924386	-21.8213	8	2.05e-08	1.05e-06	Down	Q5JRX3	Presequence protease, mitochondrial OS=Homo sapiens OX=9606 GN=PITRM1 PE=1 SV=3	100	0	NP_055704.2	presequence protease, mitochondrial isoform 2 precursor [Homo sapiens]
Q8IWB7	case1-VS-control	-2.80388	0.128866	-21.7581	8	2.1e-08	1.05e-06	Down	Q8IWB7	WD repeat and FYVE domain-containing protein 1 OS=Homo sapiens OX=9606 GN=WDFY1 PE=1 SV=1	100	0	NP_065881.1	WD repeat and FYVE domain-containing protein 1 [Homo sapiens]
Q9Y639	case1-VS-control	-2.73344	0.125439	-21.7909	8	2.07e-08	1.05e-06	Down	Q9Y639	Neuroplastin OS=Homo sapiens OX=9606 GN=NPTN PE=1 SV=2	100	0	NP_036560.1	neuroplastin isoform b precursor [Homo sapiens]
Q16658	case1-VS-control	4.34069	0.115002	37.7445	6	2.31e-08	1.14e-06	Up	Q16658	Fascin OS=Homo sapiens OX=9606 GN=FSCN1 PE=1 SV=3	100	0	AAH07539.1	FSCN1 protein, partial [Homo sapiens]
Q96AQ6	case1-VS-control	-1.96033	0.0916681	-21.3851	8	2.41e-08	1.18e-06	Down	Q96AQ6	Pre-B-cell leukemia transcription factor-interacting protein 1 OS=Homo sapiens OX=9606 GN=PBXIP1 PE=1 SV=1	100	0	NP_065385.2	pre-B-cell leukemia transcription factor-interacting protein 1 isoform 1 [Homo sapiens]
P51114	case1-VS-control	-1.40128	0.0659547	-21.2461	8	2.53e-08	1.21e-06	Down	P51114	Fragile X mental retardation syndrome-related protein 1 OS=Homo sapiens OX=9606 GN=FXR1 PE=1 SV=3	100	0	NP_005078.2	fragile X mental retardation syndrome-related protein 1 isoform a [Homo sapiens]
Q99653	case1-VS-control	-1.3411	0.0631871	-21.2242	8	2.55e-08	1.21e-06	Down	Q99653	Calcineurin B homologous protein 1 OS=Homo sapiens OX=9606 GN=CHP1 PE=1 SV=3	100	6e-140	NP_009167.1	calcineurin B homologous protein 1 [Homo sapiens]
Q9UNQ0	case1-VS-control	4.56395	0.122719	37.1903	6	2.52e-08	1.21e-06	Up	Q9UNQ0	ATP-binding cassette sub-family G member 2 OS=Homo sapiens OX=9606 GN=ABCG2 PE=1 SV=3	100	0	NP_004818.2	ATP-binding cassette sub-family G member 2 isoform 1 [Homo sapiens]
P13667	case1-VS-control	-2.27941	0.108169	-21.0728	8	2.7e-08	1.27e-06	Down	P13667	Protein disulfide-isomerase A4 OS=Homo sapiens OX=9606 GN=PDIA4 PE=1 SV=2	100	0	NP_004902.1	protein disulfide-isomerase A4 precursor [Homo sapiens]
P54652	case1-VS-control	-0.628413	0.0298871	-21.0262	8	2.75e-08	1.28e-06	None	P54652	Heat shock-related 70 kDa protein 2 OS=Homo sapiens OX=9606 GN=HSPA2 PE=1 SV=1	100	0	NP_068814.2	heat shock-related 70 kDa protein 2 [Homo sapiens]
P06756	case1-VS-control	-2.14831	0.102654	-20.9277	8	2.85e-08	1.3e-06	Down	P06756	Integrin alpha-V OS=Homo sapiens OX=9606 GN=ITGAV PE=1 SV=2	99.905	0	NP_002201.1	integrin alpha-V isoform 1 preproprotein [Homo sapiens]
P08758	case1-VS-control	3.77392	0.10342	36.4911	6	2.83e-08	1.3e-06	Up	P08758	Annexin A5 OS=Homo sapiens OX=9606 GN=ANXA5 PE=1 SV=2	100	0	NP_001145.1	annexin A5 [Homo sapiens]
O75368	case1-VS-control	3.94291	0.109729	35.9331	6	3.1e-08	1.38e-06	Up	O75368	SH3 domain-binding glutamic acid-rich-like protein OS=Homo sapiens OX=9606 GN=SH3BGRL PE=1 SV=1	100	8e-79	NP_003013.1	SH3 domain-binding glutamic acid-rich-like protein [Homo sapiens]
P55327	case1-VS-control	1.31526	0.0634697	20.7226	8	3.08e-08	1.38e-06	Up	P55327	Tumor protein D52 OS=Homo sapiens OX=9606 GN=TPD52 PE=1 SV=2	100	1e-161	NP_001020423.1	tumor protein D52 isoform 1 [Homo sapiens]
Q16643	case1-VS-control	-1.18807	0.0330779	-35.9173	6	3.11e-08	1.38e-06	Down	Q16643	Drebrin OS=Homo sapiens OX=9606 GN=DBN1 PE=1 SV=4	100	0	Q16643.4	RecName: Full=Drebrin; AltName: Full=Developmentally-regulated brain protein
Q9H2H8	case1-VS-control	1.87154	0.0905229	20.6747	8	3.14e-08	1.38e-06	Up	Q9H2H8	Peptidyl-prolyl cis-trans isomerase-like 3 OS=Homo sapiens OX=9606 GN=PPIL3 PE=1 SV=1	100	1e-118	NP_570981.1	peptidyl-prolyl cis-trans isomerase-like 3 isoform PPIL3b [Homo sapiens]
Q5JTV8	case1-VS-control	-1.82616	0.0895209	-20.3992	8	3.49e-08	1.5e-06	Down	Q5JTV8	Torsin-1A-interacting protein 1 OS=Homo sapiens OX=9606 GN=TOR1AIP1 PE=1 SV=2	100	0	NP_056417.2	torsin-1A-interacting protein 1 isoform 2 [Homo sapiens]
Q969S9	case1-VS-control	-2.70416	0.132404	-20.4235	8	3.46e-08	1.5e-06	Down	Q969S9	Ribosome-releasing factor 2, mitochondrial OS=Homo sapiens OX=9606 GN=GFM2 PE=1 SV=1	100	0	NP_115756.2	ribosome-releasing factor 2, mitochondrial isoform 1 [Homo sapiens]
Q9H269	case1-VS-control	-0.591847	0.0291045	-20.3353	8	3.57e-08	1.52e-06	None	Q9H269	Vacuolar protein sorting-associated protein 16 homolog OS=Homo sapiens OX=9606 GN=VPS16 PE=1 SV=2	100	0	NP_072097.2	vacuolar protein sorting-associated protein 16 homolog isoform 1 [Homo sapiens]
O95831	case1-VS-control	-1.92789	0.095242	-20.242	8	3.71e-08	1.56e-06	Down	O95831	Apoptosis-inducing factor 1, mitochondrial OS=Homo sapiens OX=9606 GN=AIFM1 PE=1 SV=1	100	0	NP_004199.1	apoptosis-inducing factor 1, mitochondrial isoform AIF precursor [Homo sapiens]
Q07157	case1-VS-control	-2.17505	0.108131	-20.1149	8	3.89e-08	1.63e-06	Down	Q07157	Tight junction protein ZO-1 OS=Homo sapiens OX=9606 GN=TJP1 PE=1 SV=3	99.943	0	BAG65513.1	unnamed protein product [Homo sapiens]
Q7Z4W1	case1-VS-control	-1.97764	0.0985666	-20.064	8	3.97e-08	1.65e-06	Down	Q7Z4W1	L-xylulose reductase OS=Homo sapiens OX=9606 GN=DCXR PE=1 SV=2	100	2e-178	NP_057370.1	L-xylulose reductase isoform 1 [Homo sapiens]
Q96RT1	case1-VS-control	-1.95943	0.0977961	-20.0359	8	4.02e-08	1.65e-06	Down	Q96RT1	Erbin OS=Homo sapiens OX=9606 GN=ERBIN PE=1 SV=2	100	0	NP_001240626.1	erbin isoform 1 [Homo sapiens]
Q15126	case1-VS-control	3.85075	0.193092	19.9425	8	4.17e-08	1.68e-06	Up	Q15126	Phosphomevalonate kinase OS=Homo sapiens OX=9606 GN=PMVK PE=1 SV=3	100	2e-139	NP_006547.1	phosphomevalonate kinase isoform 1 [Homo sapiens]
Q96EL3	case1-VS-control	-1.57329	0.0788081	-19.9636	8	4.13e-08	1.68e-06	Down	Q96EL3	39S ribosomal protein L53, mitochondrial OS=Homo sapiens OX=9606 GN=MRPL53 PE=1 SV=1	100	2e-77	NP_444278.1	39S ribosomal protein L53, mitochondrial [Homo sapiens]
P12931	case1-VS-control	-1.32155	0.0663453	-19.9193	8	4.21e-08	1.68e-06	Down	P12931	Proto-oncogene tyrosine-protein kinase Src OS=Homo sapiens OX=9606 GN=SRC PE=1 SV=3	100	0	NP_005408.1	proto-oncogene tyrosine-protein kinase Src [Homo sapiens]
P13674	case1-VS-control	-2.21314	0.111303	-19.884	8	4.26e-08	1.69e-06	Down	P13674	Prolyl 4-hydroxylase subunit alpha-1 OS=Homo sapiens OX=9606 GN=P4HA1 PE=1 SV=2	100	0	NP_001017962.1	prolyl 4-hydroxylase subunit alpha-1 isoform 2 precursor [Homo sapiens]
P01130	case1-VS-control	-2.33008	0.117331	-19.859	8	4.31e-08	1.69e-06	Down	P01130	Low-density lipoprotein receptor OS=Homo sapiens OX=9606 GN=LDLR PE=1 SV=1	100	0	NP_000518.1	low-density lipoprotein receptor isoform 1 precursor [Homo sapiens]
O43491	case1-VS-control	-2.82347	0.142331	-19.8373	8	4.34e-08	1.69e-06	Down	O43491	Band 4.1-like protein 2 OS=Homo sapiens OX=9606 GN=EPB41L2 PE=1 SV=1	100	0	NP_001422.1	band 4.1-like protein 2 isoform a [Homo sapiens]
Q13057	case1-VS-control	2.34303	0.11863	19.7507	8	4.5e-08	1.74e-06	Up	Q13057	Bifunctional coenzyme A synthase OS=Homo sapiens OX=9606 GN=COASY PE=1 SV=4	100	0	NP_001035994.1	bifunctional coenzyme A synthase isoform a precursor [Homo sapiens]
Q6WKZ4	case1-VS-control	-3.1945	0.162578	-19.649	8	4.68e-08	1.79e-06	Down	Q6WKZ4	Rab11 family-interacting protein 1 OS=Homo sapiens OX=9606 GN=RAB11FIP1 PE=1 SV=3	100	0	NP_001002814.2	rab11 family-interacting protein 1 isoform 3 [Homo sapiens]
P15151	case1-VS-control	-1.27752	0.0659997	-19.3565	8	5.27e-08	1.9e-06	Down	P15151	Poliovirus receptor OS=Homo sapiens OX=9606 GN=PVR PE=1 SV=2	100	0	P15151.2	RecName: Full=Poliovirus receptor; AltName: Full=Nectin-like protein 5; Short=NECL-5; AltName: CD_antigen=CD155; Flags: Precursor
P28838	case1-VS-control	-1.06886	0.0552298	-19.353	8	5.27e-08	1.9e-06	Down	P28838	Cytosol aminopeptidase OS=Homo sapiens OX=9606 GN=LAP3 PE=1 SV=3	100	0	NP_056991.2	cytosol aminopeptidase [Homo sapiens]
P35222	case1-VS-control	-3.38433	0.174544	-19.3896	8	5.2e-08	1.9e-06	Down	P35222	Catenin beta-1 OS=Homo sapiens OX=9606 GN=CTNNB1 PE=1 SV=1	99.872	0	XP_003477049.1	PREDICTED: catenin beta-1 [Cavia porcellus]
P51149	case1-VS-control	-1.5083	0.0777233	-19.4061	8	5.16e-08	1.9e-06	Down	P51149	Ras-related protein Rab-7a OS=Homo sapiens OX=9606 GN=RAB7A PE=1 SV=1	100	1e-153	NP_004628.4	ras-related protein Rab-7a [Homo sapiens]
Q5J8M3	case1-VS-control	-1.65175	0.0853647	-19.3493	8	5.28e-08	1.9e-06	Down	Q5J8M3	ER membrane protein complex subunit 4 OS=Homo sapiens OX=9606 GN=EMC4 PE=1 SV=2	100	2e-132	NP_057538.1	ER membrane protein complex subunit 4 isoform a [Homo sapiens]
Q9BQE5	case1-VS-control	-2.53741	0.130893	-19.3854	8	5.21e-08	1.9e-06	Down	Q9BQE5	Apolipoprotein L2 OS=Homo sapiens OX=9606 GN=APOL2 PE=1 SV=1	100	0	Q9BQE5.1	RecName: Full=Apolipoprotein L2; AltName: Full=Apolipoprotein L-II; Short=ApoL-II
Q9H488	case1-VS-control	-1.99656	0.103191	-19.3482	8	5.28e-08	1.9e-06	Down	Q9H488	GDP-fucose protein O-fucosyltransferase 1 OS=Homo sapiens OX=9606 GN=POFUT1 PE=1 SV=1	100	0	NP_056167.1	GDP-fucose protein O-fucosyltransferase 1 isoform 1 precursor [Homo sapiens]
Q9H5K3	case1-VS-control	-2.79619	0.144229	-19.3871	8	5.2e-08	1.9e-06	Down	Q9H5K3	Protein O-mannose kinase OS=Homo sapiens OX=9606 GN=POMK PE=1 SV=1	100	0	NP_115613.1	protein O-mannose kinase [Homo sapiens]
P08572	case1-VS-control	-1.76744	0.0539366	-32.7688	6	5.37e-08	1.91e-06	Down	P08572	Collagen alpha-2(IV) chain OS=Homo sapiens OX=9606 GN=COL4A2 PE=1 SV=4	100	0	NP_001837.2	collagen alpha-2(IV) chain preproprotein [Homo sapiens]
Q14103	case1-VS-control	-1.75727	0.0911966	-19.269	8	5.46e-08	1.93e-06	Down	Q14103	Heterogeneous nuclear ribonucleoprotein D0 OS=Homo sapiens OX=9606 GN=HNRNPD PE=1 SV=1	100	0	NP_112738.1	heterogeneous nuclear ribonucleoprotein D0 isoform a [Homo sapiens]
O75718	case1-VS-control	-2.21785	0.116025	-19.1153	8	5.81e-08	1.98e-06	Down	O75718	Cartilage-associated protein OS=Homo sapiens OX=9606 GN=CRTAP PE=1 SV=1	100	0	NP_006362.1	cartilage-associated protein precursor [Homo sapiens]
O95479	case1-VS-control	-2.55754	0.133889	-19.102	8	5.84e-08	1.98e-06	Down	O95479	GDH/6PGL endoplasmic bifunctional protein OS=Homo sapiens OX=9606 GN=H6PD PE=1 SV=2	100	0	NP_001269516.1	GDH/6PGL endoplasmic bifunctional protein isoform 1 precursor [Homo sapiens]
P05556	case1-VS-control	-1.30111	0.0679127	-19.1586	8	5.71e-08	1.98e-06	Down	P05556	Integrin beta-1 OS=Homo sapiens OX=9606 GN=ITGB1 PE=1 SV=2	100	0	CAD97649.1	hypothetical protein, partial [Homo sapiens]
Q14676	case1-VS-control	-4.70561	0.245774	-19.146	8	5.74e-08	1.98e-06	Down	Q14676	Mediator of DNA damage checkpoint protein 1 OS=Homo sapiens OX=9606 GN=MDC1 PE=1 SV=3	100	0	NP_055456.2	mediator of DNA damage checkpoint protein 1 [Homo sapiens]
Q8NFV4	case1-VS-control	-2.64564	0.137897	-19.1857	8	5.65e-08	1.98e-06	Down	Q8NFV4	Protein ABHD11 OS=Homo sapiens OX=9606 GN=ABHD11 PE=1 SV=1	100	0	NP_683710.1	protein ABHD11 isoform 1 [Homo sapiens]
Q9P0J1	case1-VS-control	-2.41819	0.126626	-19.0971	8	5.86e-08	1.98e-06	Down	Q9P0J1	[Pyruvate dehydrogenase [acetyl-transferring]]-phosphatase 1, mitochondrial OS=Homo sapiens OX=9606 GN=PDP1 PE=1 SV=3	100	0	XP_011515437.1	PREDICTED: pyruvate dehyrogenase phosphatase catalytic subunit 1 isoform X3 [Homo sapiens]
P43121	case1-VS-control	-3.20692	0.0996611	-32.1782	6	5.99e-08	1.99e-06	Down	P43121	Cell surface glycoprotein MUC18 OS=Homo sapiens OX=9606 GN=MCAM PE=1 SV=2	100	0	NP_006491.2	cell surface glycoprotein MUC18 precursor [Homo sapiens]
Q9H7F0	case1-VS-control	-3.83643	0.119147	-32.1991	6	5.97e-08	1.99e-06	Down	Q9H7F0	Probable cation-transporting ATPase 13A3 OS=Homo sapiens OX=9606 GN=ATP13A3 PE=1 SV=4	100	0	NP_078800.3	probable cation-transporting ATPase 13A3 [Homo sapiens]
O00429	case1-VS-control	2.88867	0.152987	18.8818	8	6.4e-08	2.06e-06	Up	O00429	Dynamin-1-like protein OS=Homo sapiens OX=9606 GN=DNM1L PE=1 SV=2	100	0	NP_036192.2	dynamin-1-like protein isoform 1 [Homo sapiens]
O75695	case1-VS-control	-2.02557	0.106973	-18.9354	8	6.26e-08	2.06e-06	Down	O75695	Protein XRP2 OS=Homo sapiens OX=9606 GN=RP2 PE=1 SV=4	100	0	NP_008846.2	protein XRP2 [Homo sapiens]
Q08380	case1-VS-control	-2.08708	0.110345	-18.914	8	6.31e-08	2.06e-06	Down	Q08380	Galectin-3-binding protein OS=Homo sapiens OX=9606 GN=LGALS3BP PE=1 SV=1	100	0	NP_005558.1	galectin-3-binding protein precursor [Homo sapiens]
Q8N4Q0	case1-VS-control	-2.44282	0.1291	-18.9219	8	6.29e-08	2.06e-06	Down	Q8N4Q0	Prostaglandin reductase 3 OS=Homo sapiens OX=9606 GN=ZADH2 PE=1 SV=1	100	0	NP_787103.1	prostaglandin reductase 3 isoform 1 [Homo sapiens]
Q96HJ9	case1-VS-control	-2.87427	0.152101	-18.8971	8	6.36e-08	2.06e-06	Down	Q96HJ9	Protein FMC1 homolog OS=Homo sapiens OX=9606 GN=FMC1 PE=1 SV=2	100	4e-77	NP_932068.2	protein FMC1 homolog [Homo sapiens]
O15127	case1-VS-control	-2.41146	0.12801	-18.8381	8	6.52e-08	2.08e-06	Down	O15127	Secretory carrier-associated membrane protein 2 OS=Homo sapiens OX=9606 GN=SCAMP2 PE=1 SV=2	100	0	NP_005688.2	secretory carrier-associated membrane protein 2 isoform 2 [Homo sapiens]
Q13277	case1-VS-control	-1.70832	0.0910078	-18.7711	8	6.7e-08	2.11e-06	Down	Q13277	Syntaxin-3 OS=Homo sapiens OX=9606 GN=STX3 PE=1 SV=3	100	0	NP_004168.1	syntaxin-3 isoform 1 [Homo sapiens]
Q9H3N1	case1-VS-control	-2.11447	0.112581	-18.7818	8	6.67e-08	2.11e-06	Down	Q9H3N1	Thioredoxin-related transmembrane protein 1 OS=Homo sapiens OX=9606 GN=TMX1 PE=1 SV=1	100	0	NP_110382.3	thioredoxin-related transmembrane protein 1 precursor [Homo sapiens]
P60033	case1-VS-control	-3.26997	0.174495	-18.7397	8	6.79e-08	2.11e-06	Down	P60033	CD81 antigen OS=Homo sapiens OX=9606 GN=CD81 PE=1 SV=1	100	5e-172	NP_004347.1	CD81 antigen isoform 1 [Homo sapiens]
Q86SX6	case1-VS-control	-3.04666	0.163348	-18.6513	8	7.05e-08	2.11e-06	Down	Q86SX6	Glutaredoxin-related protein 5, mitochondrial OS=Homo sapiens OX=9606 GN=GLRX5 PE=1 SV=2	100	4e-110	NP_057501.2	glutaredoxin-related protein 5, mitochondrial precursor [Homo sapiens]
Q96F85	case1-VS-control	-1.76379	0.0941693	-18.73	8	6.82e-08	2.11e-06	Down	Q96F85	CB1 cannabinoid receptor-interacting protein 1 OS=Homo sapiens OX=9606 GN=CNRIP1 PE=1 SV=1	100	7e-119	NP_056278.1	CB1 cannabinoid receptor-interacting protein 1 isoform CRIP1a [Homo sapiens]
Q9BV20	case1-VS-control	4.37468	0.188543	23.2026	7	7.01e-08	2.11e-06	Up	Q9BV20	Methylthioribose-1-phosphate isomerase OS=Homo sapiens OX=9606 GN=MRI1 PE=1 SV=1	100	0	NP_001026897.1	methylthioribose-1-phosphate isomerase isoform 1 [Homo sapiens]
Q9BY77	case1-VS-control	-1.82269	0.0977013	-18.6558	8	7.03e-08	2.11e-06	Down	Q9BY77	Polymerase delta-interacting protein 3 OS=Homo sapiens OX=9606 GN=POLDIP3 PE=1 SV=2	100	0	NP_115687.2	polymerase delta-interacting protein 3 isoform 1 [Homo sapiens]
Q9NZ08	case1-VS-control	-2.41921	0.129277	-18.7134	8	6.87e-08	2.11e-06	Down	Q9NZ08	Endoplasmic reticulum aminopeptidase 1 OS=Homo sapiens OX=9606 GN=ERAP1 PE=1 SV=3	100	0	NP_001035548.1	endoplasmic reticulum aminopeptidase 1 isoform b precursor [Homo sapiens]
Q9UIQ6	case1-VS-control	-2.97954	0.159598	-18.6691	8	6.99e-08	2.11e-06	Down	Q9UIQ6	Leucyl-cystinyl aminopeptidase OS=Homo sapiens OX=9606 GN=LNPEP PE=1 SV=3	100	0	NP_005566.2	leucyl-cystinyl aminopeptidase isoform 1 [Homo sapiens]
P78536	case1-VS-control	-2.10894	0.11333	-18.6088	8	7.17e-08	2.14e-06	Down	P78536	Disintegrin and metalloproteinase domain-containing protein 17 OS=Homo sapiens OX=9606 GN=ADAM17 PE=1 SV=1	100	0	NP_003174.3	disintegrin and metalloproteinase domain-containing protein 17 preproprotein [Homo sapiens]
P50454	case1-VS-control	-1.22433	0.0659543	-18.5634	8	7.31e-08	2.15e-06	Down	P50454	Serpin H1 OS=Homo sapiens OX=9606 GN=SERPINH1 PE=1 SV=2	100	0	NP_001226.2	serpin H1 precursor [Homo sapiens]
Q9H6E4	case1-VS-control	-1.7479	0.0942057	-18.5541	8	7.34e-08	2.15e-06	Down	Q9H6E4	Coiled-coil domain-containing protein 134 OS=Homo sapiens OX=9606 GN=CCDC134 PE=1 SV=1	100	9e-169	NP_079097.1	coiled-coil domain-containing protein 134 isoform 1 precursor [Homo sapiens]
Q9Y2D5	case1-VS-control	-3.09353	0.134154	-23.0595	7	7.31e-08	2.15e-06	Down	Q9Y2D5	A-kinase anchor protein 2 OS=Homo sapiens OX=9606 GN=AKAP2 PE=1 SV=3	100	0	EAW59054.1	hCG28765, isoform CRA_d [Homo sapiens]
O14773	case1-VS-control	-1.91085	0.103459	-18.4696	8	7.61e-08	2.21e-06	Down	O14773	Tripeptidyl-peptidase 1 OS=Homo sapiens OX=9606 GN=TPP1 PE=1 SV=2	100	0	EAW68685.1	tripeptidyl peptidase I, isoform CRA_a [Homo sapiens]
O60313	case1-VS-control	-1.60193	0.0868582	-18.443	8	7.69e-08	2.21e-06	Down	O60313	Dynamin-like 120 kDa protein, mitochondrial OS=Homo sapiens OX=9606 GN=OPA1 PE=1 SV=3	100	0	NP_056375.2	dynamin-like 120 kDa protein, mitochondrial isoform 1 preproprotein [Homo sapiens]
Q9BRJ2	case1-VS-control	-1.3173	0.0713955	-18.4508	8	7.67e-08	2.21e-06	Down	Q9BRJ2	39S ribosomal protein L45, mitochondrial OS=Homo sapiens OX=9606 GN=MRPL45 PE=1 SV=2	100	0	Q9BRJ2.2	RecName: Full=39S ribosomal protein L45, mitochondrial; Short=L45mt; Short=MRP-L45; AltName: Full=Mitochondrial large ribosomal subunit protein mL45; Flags: Precursor
Q14697	case1-VS-control	-1.95611	0.106167	-18.4247	8	7.76e-08	2.21e-06	Down	Q14697	Neutral alpha-glucosidase AB OS=Homo sapiens OX=9606 GN=GANAB PE=1 SV=3	100	0	NP_938148.1	neutral alpha-glucosidase AB isoform 2 precursor [Homo sapiens]
P24666	case1-VS-control	2.59199	0.141001	18.3827	8	7.89e-08	2.22e-06	Up	P24666	Low molecular weight phosphotyrosine protein phosphatase OS=Homo sapiens OX=9606 GN=ACP1 PE=1 SV=3	100	2e-117	NP_004291.1	low molecular weight phosphotyrosine protein phosphatase isoform c [Homo sapiens]
Q8IVL6	case1-VS-control	-2.54345	0.0827447	-30.7385	6	7.87e-08	2.22e-06	Down	Q8IVL6	Prolyl 3-hydroxylase 3 OS=Homo sapiens OX=9606 GN=P3H3 PE=1 SV=1	100	0	NP_055077.2	prolyl 3-hydroxylase 3 precursor [Homo sapiens]
Q14534	case1-VS-control	-3.65843	0.199906	-18.3008	8	8.18e-08	2.28e-06	Down	Q14534	Squalene monooxygenase OS=Homo sapiens OX=9606 GN=SQLE PE=1 SV=3	100	0	NP_003120.2	squalene monooxygenase [Homo sapiens]
Q92581	case1-VS-control	-2.8574	0.156167	-18.2971	8	8.19e-08	2.28e-06	Down	Q92581	Sodium/hydrogen exchanger 6 OS=Homo sapiens OX=9606 GN=SLC9A6 PE=1 SV=2	100	0	NP_006350.1	sodium/hydrogen exchanger 6 isoform b precursor [Homo sapiens]
P23497	case1-VS-control	-2.85256	0.156292	-18.2515	8	8.35e-08	2.31e-06	Down	P23497	Nuclear autoantigen Sp-100 OS=Homo sapiens OX=9606 GN=SP100 PE=1 SV=3	100	0	NP_003104.2	nuclear autoantigen Sp-100 isoform 2 [Homo sapiens]
P05067	case1-VS-control	-2.34963	0.129076	-18.2034	8	8.53e-08	2.33e-06	Down	P05067	Amyloid-beta A4 protein OS=Homo sapiens OX=9606 GN=APP PE=1 SV=3	100	0	NP_000475.1	amyloid beta A4 protein isoform a precursor [Homo sapiens]
Q05639	case1-VS-control	2.76316	0.0910667	30.3421	6	8.5e-08	2.33e-06	Up	Q05639	Elongation factor 1-alpha 2 OS=Homo sapiens OX=9606 GN=EEF1A2 PE=1 SV=1	100	0	NP_001949.1	elongation factor 1-alpha 2 [Homo sapiens]
P15586	case1-VS-control	-1.94861	0.107194	-18.1783	8	8.62e-08	2.34e-06	Down	P15586	N-acetylglucosamine-6-sulfatase OS=Homo sapiens OX=9606 GN=GNS PE=1 SV=3	100	0	NP_002067.1	N-acetylglucosamine-6-sulfatase precursor [Homo sapiens]
O43505	case1-VS-control	-2.09082	0.115283	-18.1364	8	8.77e-08	2.37e-06	Down	O43505	Beta-1,4-glucuronyltransferase 1 OS=Homo sapiens OX=9606 GN=B4GAT1 PE=1 SV=1	100	0	NP_006867.1	beta-1,4-glucuronyltransferase 1 [Homo sapiens]
P29317	case1-VS-control	-2.82507	0.156144	-18.0927	8	8.94e-08	2.4e-06	Down	P29317	Ephrin type-A receptor 2 OS=Homo sapiens OX=9606 GN=EPHA2 PE=1 SV=2	100	0	NP_004422.2	ephrin type-A receptor 2 isoform 1 precursor [Homo sapiens]
P07339	case1-VS-control	-1.75233	0.0975225	-17.9684	8	9.44e-08	2.51e-06	Down	P07339	Cathepsin D OS=Homo sapiens OX=9606 GN=CTSD PE=1 SV=1	100	0	NP_001900.1	cathepsin D preproprotein [Homo sapiens]
P50148	case1-VS-control	-2.16112	0.120434	-17.9445	8	9.54e-08	2.51e-06	Down	P50148	Guanine nucleotide-binding protein G(q) subunit alpha OS=Homo sapiens OX=9606 GN=GNAQ PE=1 SV=4	99.721	0	XP_020040613.1	guanine nucleotide-binding protein G(q) subunit alpha [Castor canadensis]
Q86U28	case1-VS-control	-2.7686	0.154284	-17.9448	8	9.54e-08	2.51e-06	Down	Q86U28	Iron-sulfur cluster assembly 2 homolog, mitochondrial OS=Homo sapiens OX=9606 GN=ISCA2 PE=1 SV=2	100	2e-107	NP_919255.2	iron-sulfur cluster assembly 2 homolog, mitochondrial isoform 1 precursor [Homo sapiens]
Q9P035	case1-VS-control	-1.91316	0.106692	-17.9316	8	9.59e-08	2.51e-06	Down	Q9P035	Very-long-chain (3R)-3-hydroxyacyl-CoA dehydratase 3 OS=Homo sapiens OX=9606 GN=HACD3 PE=1 SV=2	100	0	NP_001127566.1	very-long-chain (3R)-3-hydroxyacyl-CoA dehydratase 3 [Pongo abelii]
Q92520	case1-VS-control	-2.25205	0.1259	-17.8876	8	9.78e-08	2.55e-06	Down	Q92520	Protein FAM3C OS=Homo sapiens OX=9606 GN=FAM3C PE=1 SV=1	100	2e-168	NP_055703.1	protein FAM3C precursor [Homo sapiens]
Q15006	case1-VS-control	-2.03874	0.11426	-17.843	8	9.97e-08	2.57e-06	Down	Q15006	ER membrane protein complex subunit 2 OS=Homo sapiens OX=9606 GN=EMC2 PE=1 SV=1	100	0	NP_055488.1	ER membrane protein complex subunit 2 isoform 2 [Homo sapiens]
Q9NPF4	case1-VS-control	2.75739	0.124954	22.0673	7	9.91e-08	2.57e-06	Up	Q9NPF4	Probable tRNA N6-adenosine threonylcarbamoyltransferase OS=Homo sapiens OX=9606 GN=OSGEP PE=1 SV=1	100	0	NP_060277.1	probable tRNA N6-adenosine threonylcarbamoyltransferase [Homo sapiens]
Q9H0V9	case1-VS-control	-1.4014	0.0787153	-17.8034	8	1.01e-07	2.6e-06	Down	Q9H0V9	VIP36-like protein OS=Homo sapiens OX=9606 GN=LMAN2L PE=1 SV=1	100	0	NP_110432.1	VIP36-like protein isoform 2 precursor [Homo sapiens]
P19022	case1-VS-control	-5.22549	0.177638	-29.4165	6	1.02e-07	2.61e-06	Down	P19022	Cadherin-2 OS=Homo sapiens OX=9606 GN=CDH2 PE=1 SV=4	100	0	NP_001783.2	cadherin-2 isoform 1 preproprotein [Homo sapiens]
P42166	case1-VS-control	-1.98232	0.112012	-17.6973	8	1.06e-07	2.68e-06	Down	P42166	Lamina-associated polypeptide 2, isoform alpha OS=Homo sapiens OX=9606 GN=TMPO PE=1 SV=2	100	0	NP_003267.1	thymopoietin isoform alpha [Homo sapiens]
P50281	case1-VS-control	-2.95611	0.10105	-29.2538	6	1.06e-07	2.68e-06	Down	P50281	Matrix metalloproteinase-14 OS=Homo sapiens OX=9606 GN=MMP14 PE=1 SV=3	100	0	NP_004986.1	matrix metalloproteinase-14 preproprotein [Homo sapiens]
Q08257	case1-VS-control	1.35414	0.0768051	17.6309	8	1.09e-07	2.74e-06	Up	Q08257	Quinone oxidoreductase OS=Homo sapiens OX=9606 GN=CRYZ PE=1 SV=1	100	0	NP_001880.2	quinone oxidoreductase isoform a [Homo sapiens]
Q8NBS9	case1-VS-control	-1.70856	0.0969804	-17.6176	8	1.1e-07	2.74e-06	Down	Q8NBS9	Thioredoxin domain-containing protein 5 OS=Homo sapiens OX=9606 GN=TXNDC5 PE=1 SV=2	100	0	NP_110437.2	thioredoxin domain-containing protein 5 isoform 1 precursor [Homo sapiens]
P0DMV8	case1-VS-control	1.58644	0.0903796	17.553	8	1.13e-07	2.81e-06	Up	P0DMV8;P0DMV9	Heat shock 70 kDa protein 1A OS=Homo sapiens OX=9606 GN=HSPA1A PE=1 SV=1	100	0	NP_005337.2	heat shock 70 kDa protein 1B [Homo sapiens]
Q9BTZ2	case1-VS-control	4.77624	0.221047	21.6073	7	1.15e-07	2.83e-06	Up	Q9BTZ2	Dehydrogenase/reductase SDR family member 4 OS=Homo sapiens OX=9606 GN=DHRS4 PE=1 SV=3	100	0	NP_066284.2	dehydrogenase/reductase SDR family member 4 isoform 1 [Homo sapiens]
Q5HYK3	case1-VS-control	-1.63898	0.0937984	-17.4734	8	1.17e-07	2.88e-06	Down	Q5HYK3	2-methoxy-6-polyprenyl-1,4-benzoquinol methylase, mitochondrial OS=Homo sapiens OX=9606 GN=COQ5 PE=1 SV=2	100	0	NP_115690.3	2-methoxy-6-polyprenyl-1,4-benzoquinol methylase, mitochondrial precursor [Homo sapiens]
P20700	case1-VS-control	-2.21636	0.127347	-17.4041	8	1.21e-07	2.95e-06	Down	P20700	Lamin-B1 OS=Homo sapiens OX=9606 GN=LMNB1 PE=1 SV=2	99.829	0	XP_004042476.1	PREDICTED: lamin-B1 [Gorilla gorilla gorilla]
P52815	case1-VS-control	-1.48671	0.0854659	-17.3953	8	1.22e-07	2.95e-06	Down	P52815	39S ribosomal protein L12, mitochondrial OS=Homo sapiens OX=9606 GN=MRPL12 PE=1 SV=2	100	4e-140	NP_002940.2	39S ribosomal protein L12, mitochondrial [Homo sapiens]
Q9BXY0	case1-VS-control	-2.10471	0.122408	-17.1942	8	1.33e-07	3.21e-06	Down	Q9BXY0	Protein MAK16 homolog OS=Homo sapiens OX=9606 GN=MAK16 PE=1 SV=2	100	0	NP_115898.2	protein MAK16 homolog [Homo sapiens]
O95816	case1-VS-control	1.03562	0.0603453	17.1615	8	1.35e-07	3.24e-06	Up	O95816	BAG family molecular chaperone regulator 2 OS=Homo sapiens OX=9606 GN=BAG2 PE=1 SV=1	100	1e-152	NP_004273.1	BAG family molecular chaperone regulator 2 [Homo sapiens]
P10253	case1-VS-control	-3.21645	0.187632	-17.1424	8	1.36e-07	3.26e-06	Down	P10253	Lysosomal alpha-glucosidase OS=Homo sapiens OX=9606 GN=GAA PE=1 SV=4	100	0	NP_000143.2	lysosomal alpha-glucosidase preproprotein [Homo sapiens]
Q9NVP2	case1-VS-control	2.26574	0.107642	21.0489	7	1.37e-07	3.26e-06	Up	Q9NVP2	Histone chaperone ASF1B OS=Homo sapiens OX=9606 GN=ASF1B PE=1 SV=1	100	4e-148	NP_060624.1	histone chaperone ASF1B [Homo sapiens]
Q14980	case1-VS-control	-2.45329	0.14335	-17.114	8	1.38e-07	3.26e-06	Down	Q14980	Nuclear mitotic apparatus protein 1 OS=Homo sapiens OX=9606 GN=NUMA1 PE=1 SV=2	100	0	NP_006176.2	nuclear mitotic apparatus protein 1 isoform 1 [Homo sapiens]
Q49A26	case1-VS-control	-2.74607	0.160791	-17.0785	8	1.4e-07	3.3e-06	Down	Q49A26	Putative oxidoreductase GLYR1 OS=Homo sapiens OX=9606 GN=GLYR1 PE=1 SV=4	100	0	NP_115958.2	putative oxidoreductase GLYR1 isoform 1 [Homo sapiens]
P26440	case1-VS-control	-2.22541	0.131026	-16.9846	8	1.47e-07	3.41e-06	Down	P26440	Isovaleryl-CoA dehydrogenase, mitochondrial OS=Homo sapiens OX=9606 GN=IVD PE=1 SV=2	100	0	NP_002216.2	isovaleryl-CoA dehydrogenase, mitochondrial isoform 1 precursor [Homo sapiens]
Q8N8R5	case1-VS-control	-1.18482	0.0697604	-16.9841	8	1.47e-07	3.41e-06	Down	Q8N8R5	UPF0565 protein C2orf69 OS=Homo sapiens OX=9606 GN=C2orf69 PE=1 SV=1	100	0	NP_710156.3	UPF0565 protein C2orf69 precursor [Homo sapiens]
Q15417	case1-VS-control	-2.8516	0.16805	-16.9688	8	1.48e-07	3.42e-06	Down	Q15417	Calponin-3 OS=Homo sapiens OX=9606 GN=CNN3 PE=1 SV=1	100	0	NP_001830.1	calponin-3 isoform 1 [Homo sapiens]
Q8N1F8	case1-VS-control	-2.23382	0.131983	-16.9251	8	1.51e-07	3.47e-06	Down	Q8N1F8	Serine/threonine-protein kinase 11-interacting protein OS=Homo sapiens OX=9606 GN=STK11IP PE=1 SV=4	100	0	NP_443134.3	serine/threonine-protein kinase 11-interacting protein [Homo sapiens]
Q07954	case1-VS-control	-2.04517	0.121072	-16.8923	8	1.53e-07	3.49e-06	Down	Q07954	Prolow-density lipoprotein receptor-related protein 1 OS=Homo sapiens OX=9606 GN=LRP1 PE=1 SV=2	100	0	NP_002323.2	prolow-density lipoprotein receptor-related protein 1 preproprotein [Homo sapiens]
Q96GW9	case1-VS-control	-1.03066	0.0610082	-16.8938	8	1.53e-07	3.49e-06	Down	Q96GW9	Methionine--tRNA ligase, mitochondrial OS=Homo sapiens OX=9606 GN=MARS2 PE=1 SV=2	100	0	AAH09115.1	MARS2 protein, partial [Homo sapiens]
Q96RS6	case1-VS-control	2.76939	0.13378	20.701	7	1.54e-07	3.5e-06	Up	Q96RS6	NudC domain-containing protein 1 OS=Homo sapiens OX=9606 GN=NUDCD1 PE=1 SV=2	100	0	NP_116258.2	nudC domain-containing protein 1 isoform 1 [Homo sapiens]
Q8WXI9	case1-VS-control	-1.62123	0.0961352	-16.8641	8	1.55e-07	3.5e-06	Down	Q8WXI9	Transcriptional repressor p66-beta OS=Homo sapiens OX=9606 GN=GATAD2B PE=1 SV=1	100	0	NP_065750.1	transcriptional repressor p66-beta [Homo sapiens]
P62253	case1-VS-control	3.80751	0.184208	20.6696	7	1.56e-07	3.5e-06	Up	P62253	Ubiquitin-conjugating enzyme E2 G1 OS=Homo sapiens OX=9606 GN=UBE2G1 PE=1 SV=3	100	1e-124	XP_004716250.1	PREDICTED: LOW QUALITY PROTEIN: ubiquitin-conjugating enzyme E2 G1 [Echinops telfairi]
P30837	case1-VS-control	-3.20233	0.190781	-16.7854	8	1.61e-07	3.54e-06	Down	P30837	Aldehyde dehydrogenase X, mitochondrial OS=Homo sapiens OX=9606 GN=ALDH1B1 PE=1 SV=3	100	0	P30837.3	RecName: Full=Aldehyde dehydrogenase X, mitochondrial; AltName: Full=Aldehyde dehydrogenase 5; AltName: Full=Aldehyde dehydrogenase family 1 member B1; Flags: Precursor
Q9H553	case1-VS-control	-1.3796	0.0821244	-16.799	8	1.6e-07	3.54e-06	Down	Q9H553	Alpha-1,3/1,6-mannosyltransferase ALG2 OS=Homo sapiens OX=9606 GN=ALG2 PE=1 SV=1	100	0	NP_149078.1	alpha-1,3/1,6-mannosyltransferase ALG2 [Homo sapiens]
Q9UBQ7	case1-VS-control	-1.40176	0.0834268	-16.8023	8	1.59e-07	3.54e-06	Down	Q9UBQ7	Glyoxylate reductase/hydroxypyruvate reductase OS=Homo sapiens OX=9606 GN=GRHPR PE=1 SV=1	100	0	NP_036335.1	glyoxylate reductase/hydroxypyruvate reductase [Homo sapiens]
Q9Y6M1	case1-VS-control	-2.27546	0.1355	-16.7931	8	1.6e-07	3.54e-06	Down	Q9Y6M1	Insulin-like growth factor 2 mRNA-binding protein 2 OS=Homo sapiens OX=9606 GN=IGF2BP2 PE=1 SV=2	100	0	NP_006539.3	insulin-like growth factor 2 mRNA-binding protein 2 isoform a [Homo sapiens]
Q8N766	case1-VS-control	-1.26025	0.0752384	-16.7501	8	1.63e-07	3.58e-06	Down	Q8N766	ER membrane protein complex subunit 1 OS=Homo sapiens OX=9606 GN=EMC1 PE=1 SV=1	100	0	NP_055862.1	ER membrane protein complex subunit 1 isoform 1 precursor [Homo sapiens]
P45984	case1-VS-control	1.85332	0.0682451	27.1568	6	1.65e-07	3.59e-06	Up	P45984	Mitogen-activated protein kinase 9 OS=Homo sapiens OX=9606 GN=MAPK9 PE=1 SV=2	100	0	NP_002743.3	mitogen-activated protein kinase 9 isoform alpha2 [Homo sapiens]
P27105	case1-VS-control	-1.70427	0.0628199	-27.1294	6	1.66e-07	3.6e-06	Down	P27105	Erythrocyte band 7 integral membrane protein OS=Homo sapiens OX=9606 GN=STOM PE=1 SV=3	100	0	NP_004090.4	erythrocyte band 7 integral membrane protein isoform a [Homo sapiens]
P08621	case1-VS-control	-1.03541	0.0621006	-16.6732	8	1.69e-07	3.66e-06	Down	P08621	U1 small nuclear ribonucleoprotein 70 kDa OS=Homo sapiens OX=9606 GN=SNRNP70 PE=1 SV=2	100	0	NP_003080.2	U1 small nuclear ribonucleoprotein 70 kDa isoform 1 [Homo sapiens]
O60907	case1-VS-control	-0.870018	0.0522395	-16.6544	8	1.71e-07	3.67e-06	None	O60907	F-box-like/WD repeat-containing protein TBL1X OS=Homo sapiens OX=9606 GN=TBL1X PE=1 SV=3	100	0	NP_005638.1	F-box-like/WD repeat-containing protein TBL1X isoform a [Homo sapiens]
P20645	case1-VS-control	-2.03051	0.12207	-16.634	8	1.72e-07	3.69e-06	Down	P20645	Cation-dependent mannose-6-phosphate receptor OS=Homo sapiens OX=9606 GN=M6PR PE=1 SV=1	100	0	NP_002346.1	cation-dependent mannose-6-phosphate receptor isoform 1 precursor [Homo sapiens]
O75436	case1-VS-control	1.76111	0.106083	16.6012	8	1.75e-07	3.73e-06	Up	O75436	Vacuolar protein sorting-associated protein 26A OS=Homo sapiens OX=9606 GN=VPS26A PE=1 SV=2	100	0	NP_004887.2	vacuolar protein sorting-associated protein 26A isoform 1 [Homo sapiens]
P48723	case1-VS-control	-2.21837	0.133736	-16.5878	8	1.76e-07	3.74e-06	Down	P48723	Heat shock 70 kDa protein 13 OS=Homo sapiens OX=9606 GN=HSPA13 PE=1 SV=1	100	0	NP_008879.3	heat shock 70 kDa protein 13 precursor [Homo sapiens]
Q9Y3L5	case1-VS-control	-1.00079	0.0603932	-16.5712	8	1.78e-07	3.75e-06	Down	Q9Y3L5	Ras-related protein Rap-2c OS=Homo sapiens OX=9606 GN=RAP2C PE=1 SV=1	100	7e-133	NP_766001.1	ras-related protein Rap-2c precursor [Mus musculus]
Q15046	case1-VS-control	1.6457	0.0995045	16.539	8	1.8e-07	3.79e-06	Up	Q15046	Lysine--tRNA ligase OS=Homo sapiens OX=9606 GN=KARS PE=1 SV=3	100	0	NP_005539.1	lysine--tRNA ligase isoform 2 [Homo sapiens]
P46459	case1-VS-control	-1.28556	0.0779026	-16.5022	8	1.83e-07	3.82e-06	Down	P46459	Vesicle-fusing ATPase OS=Homo sapiens OX=9606 GN=NSF PE=1 SV=3	100	0	NP_006169.2	vesicle-fusing ATPase [Homo sapiens]
Q8N0U8	case1-VS-control	-1.3609	0.0825005	-16.4957	8	1.84e-07	3.82e-06	Down	Q8N0U8	Vitamin K epoxide reductase complex subunit 1-like protein 1 OS=Homo sapiens OX=9606 GN=VKORC1L1 PE=1 SV=2	100	8e-126	XP_527770.3	PREDICTED: vitamin K epoxide reductase complex subunit 1-like protein 1 isoform X2 [Pan troglodytes]
Q9UJZ1	case1-VS-control	-2.10184	0.127445	-16.4922	8	1.84e-07	3.82e-06	Down	Q9UJZ1	Stomatin-like protein 2, mitochondrial OS=Homo sapiens OX=9606 GN=STOML2 PE=1 SV=1	100	0	NP_038470.1	stomatin-like protein 2, mitochondrial isoform a [Homo sapiens]
Q96S97	case1-VS-control	-1.88916	0.114755	-16.4626	8	1.87e-07	3.84e-06	Down	Q96S97	Myeloid-associated differentiation marker OS=Homo sapiens OX=9606 GN=MYADM PE=1 SV=2	100	0	NP_612382.1	myeloid-associated differentiation marker [Homo sapiens]
Q9UJV9	case1-VS-control	-2.16503	0.131464	-16.4686	8	1.86e-07	3.84e-06	Down	Q9UJV9	Probable ATP-dependent RNA helicase DDX41 OS=Homo sapiens OX=9606 GN=DDX41 PE=1 SV=2	100	0	NP_057306.2	probable ATP-dependent RNA helicase DDX41 isoform 1 [Homo sapiens]
P42892	case1-VS-control	-3.5791	0.217553	-16.4516	8	1.88e-07	3.84e-06	Down	P42892	Endothelin-converting enzyme 1 OS=Homo sapiens OX=9606 GN=ECE1 PE=1 SV=2	100	0	NP_001388.1	endothelin-converting enzyme 1 isoform 1 [Homo sapiens]
P13473	case1-VS-control	-2.59101	0.157833	-16.4161	8	1.91e-07	3.87e-06	Down	P13473	Lysosome-associated membrane glycoprotein 2 OS=Homo sapiens OX=9606 GN=LAMP2 PE=1 SV=2	100	0	NP_002285.1	lysosome-associated membrane glycoprotein 2 isoform A precursor [Homo sapiens]
P48509	case1-VS-control	-2.41787	0.147239	-16.4214	8	1.91e-07	3.87e-06	Down	P48509	CD151 antigen OS=Homo sapiens OX=9606 GN=CD151 PE=1 SV=3	100	0	NP_004348.2	CD151 antigen [Homo sapiens]
P15336	case1-VS-control	-2.58528	0.15774	-16.3895	8	1.94e-07	3.91e-06	Down	P15336	Cyclic AMP-dependent transcription factor ATF-2 OS=Homo sapiens OX=9606 GN=ATF2 PE=1 SV=4	100	0	NP_001871.2	cyclic AMP-dependent transcription factor ATF-2 isoform 1 [Homo sapiens]
Q9BZQ6	case1-VS-control	-1.91148	0.116695	-16.3802	8	1.94e-07	3.91e-06	Down	Q9BZQ6	ER degradation-enhancing alpha-mannosidase-like protein 3 OS=Homo sapiens OX=9606 GN=EDEM3 PE=1 SV=2	100	0	NP_079467.3	ER degradation-enhancing alpha-mannosidase-like protein 3 isoform 2 precursor [Homo sapiens]
Q6PI78	case1-VS-control	-3.30296	0.202019	-16.3497	8	1.97e-07	3.92e-06	Down	Q6PI78	Transmembrane protein 65 OS=Homo sapiens OX=9606 GN=TMEM65 PE=1 SV=2	100	6e-173	NP_919267.2	transmembrane protein 65 [Homo sapiens]
Q96GM8	case1-VS-control	1.15345	0.07053	16.3541	8	1.97e-07	3.92e-06	Up	Q96GM8	Target of EGR1 protein 1 OS=Homo sapiens OX=9606 GN=TOE1 PE=1 SV=1	100	0	NP_079353.3	target of EGR1 protein 1 [Homo sapiens]
Q96QK1	case1-VS-control	1.80445	0.110385	16.3469	8	1.98e-07	3.92e-06	Up	Q96QK1	Vacuolar protein sorting-associated protein 35 OS=Homo sapiens OX=9606 GN=VPS35 PE=1 SV=2	100	0	NP_060676.2	vacuolar protein sorting-associated protein 35 [Homo sapiens]
P07237	case1-VS-control	-1.8029	0.110888	-16.2587	8	2.06e-07	3.98e-06	Down	P07237	Protein disulfide-isomerase OS=Homo sapiens OX=9606 GN=P4HB PE=1 SV=3	100	0	NP_000909.2	protein disulfide-isomerase precursor [Homo sapiens]
P08069	case1-VS-control	-4.78978	0.18327	-26.1352	6	2.07e-07	3.98e-06	Down	P08069	Insulin-like growth factor 1 receptor OS=Homo sapiens OX=9606 GN=IGF1R PE=1 SV=1	100	0	NP_000866.1	insulin-like growth factor 1 receptor isoform 1 precursor [Homo sapiens]
Q13637	case1-VS-control	-1.3628	0.0839165	-16.2399	8	2.08e-07	3.98e-06	Down	Q13637	Ras-related protein Rab-32 OS=Homo sapiens OX=9606 GN=RAB32 PE=1 SV=3	100	3e-168	NP_006825.1	ras-related protein Rab-32 [Homo sapiens]
Q15526	case1-VS-control	1.15505	0.0708922	16.2931	8	2.03e-07	3.98e-06	Up	Q15526	Surfeit locus protein 1 OS=Homo sapiens OX=9606 GN=SURF1 PE=1 SV=1	100	0	NP_003163.1	surfeit locus protein 1 isoform 1 [Homo sapiens]
Q5T160	case1-VS-control	-2.54964	0.128596	-19.8267	7	2.08e-07	3.98e-06	Down	Q5T160	Probable arginine--tRNA ligase, mitochondrial OS=Homo sapiens OX=9606 GN=RARS2 PE=1 SV=1	100	0	NP_064716.2	probable arginine--tRNA ligase, mitochondrial isoform 1 precursor [Homo sapiens]
Q96AY3	case1-VS-control	-1.58818	0.0975653	-16.2781	8	2.04e-07	3.98e-06	Down	Q96AY3	Peptidyl-prolyl cis-trans isomerase FKBP10 OS=Homo sapiens OX=9606 GN=FKBP10 PE=1 SV=1	100	0	NP_068758.3	peptidyl-prolyl cis-trans isomerase FKBP10 precursor [Homo sapiens]
Q96DG6	case1-VS-control	4.74767	0.181373	26.1763	6	2.05e-07	3.98e-06	Up	Q96DG6	Carboxymethylenebutenolidase homolog OS=Homo sapiens OX=9606 GN=CMBL PE=1 SV=1	100	0	NP_620164.1	carboxymethylenebutenolidase homolog [Homo sapiens]
Q96QD8	case1-VS-control	2.15085	0.13243	16.2413	8	2.08e-07	3.98e-06	Up	Q96QD8	Sodium-coupled neutral amino acid transporter 2 OS=Homo sapiens OX=9606 GN=SLC38A2 PE=1 SV=2	100	0	NP_061849.2	sodium-coupled neutral amino acid transporter 2 isoform 1 [Homo sapiens]
P51572	case1-VS-control	-1.43996	0.0887715	-16.221	8	2.1e-07	3.99e-06	Down	P51572	B-cell receptor-associated protein 31 OS=Homo sapiens OX=9606 GN=BCAP31 PE=1 SV=3	100	2e-178	NP_005736.3	B-cell receptor-associated protein 31 isoform b [Homo sapiens]
Q14247	case1-VS-control	1.26637	0.0780536	16.2244	8	2.09e-07	3.99e-06	Up	Q14247	Src substrate cortactin OS=Homo sapiens OX=9606 GN=CTTN PE=1 SV=2	100	0	NP_005222.2	src substrate cortactin isoform a [Homo sapiens]
Q7Z3C6	case1-VS-control	-2.51658	0.155907	-16.1415	8	2.18e-07	4.12e-06	Down	Q7Z3C6	Autophagy-related protein 9A OS=Homo sapiens OX=9606 GN=ATG9A PE=1 SV=3	100	0	NP_001070666.1	autophagy-related protein 9A [Homo sapiens]
Q06210	case1-VS-control	3.19671	0.200269	15.9621	8	2.38e-07	4.48e-06	Up	Q06210	Glutamine--fructose-6-phosphate aminotransferase [isomerizing] 1 OS=Homo sapiens OX=9606 GN=GFPT1 PE=1 SV=3	100	0	NP_001231639.1	glutamine--fructose-6-phosphate aminotransferase [isomerizing] 1 isoform 1 [Homo sapiens]
P31327	case1-VS-control	9.48483	0.250669	37.8381	5	2.43e-07	4.54e-06	Up	P31327	Carbamoyl-phosphate synthase [ammonia], mitochondrial OS=Homo sapiens OX=9606 GN=CPS1 PE=1 SV=2	100	0	XP_011508942.1	PREDICTED: carbamoyl-phosphate synthase [ammonia], mitochondrial isoform X1 [Homo sapiens]
Q15904	case1-VS-control	-2.33489	0.146606	-15.9263	8	2.42e-07	4.54e-06	Down	Q15904	V-type proton ATPase subunit S1 OS=Homo sapiens OX=9606 GN=ATP6AP1 PE=1 SV=2	100	0	NP_001174.2	V-type proton ATPase subunit S1 precursor [Homo sapiens]
Q9BZK7	case1-VS-control	-1.20949	0.0760366	-15.9066	8	2.44e-07	4.55e-06	Down	Q9BZK7	F-box-like/WD repeat-containing protein TBL1XR1 OS=Homo sapiens OX=9606 GN=TBL1XR1 PE=1 SV=1	100	0	NP_078941.2	F-box-like/WD repeat-containing protein TBL1XR1 isoform 1 [Homo sapiens]
Q13190	case1-VS-control	-1.50786	0.0948606	-15.8956	8	2.46e-07	4.55e-06	Down	Q13190	Syntaxin-5 OS=Homo sapiens OX=9606 GN=STX5 PE=1 SV=2	100	0	NP_003155.2	syntaxin-5 isoform 1 [Homo sapiens]
Q8WXF1	case1-VS-control	-2.62632	0.165589	-15.8605	8	2.5e-07	4.61e-06	Down	Q8WXF1	Paraspeckle component 1 OS=Homo sapiens OX=9606 GN=PSPC1 PE=1 SV=1	100	0	NP_001035879.1	paraspeckle component 1 isoform 1 [Homo sapiens]
Q9BTV4	case1-VS-control	-1.17767	0.0743041	-15.8493	8	2.51e-07	4.62e-06	Down	Q9BTV4	Transmembrane protein 43 OS=Homo sapiens OX=9606 GN=TMEM43 PE=1 SV=1	100	0	NP_077310.1	transmembrane protein 43 [Homo sapiens]
P82921	case1-VS-control	-1.61234	0.101873	-15.8269	8	2.54e-07	4.65e-06	Down	P82921	28S ribosomal protein S21, mitochondrial OS=Homo sapiens OX=9606 GN=MRPS21 PE=1 SV=3	98.851	1e-57	NP_114107.1	28S ribosomal protein S21, mitochondrial [Homo sapiens]
O14657	case1-VS-control	-3.85885	0.244282	-15.7967	8	2.58e-07	4.7e-06	Down	O14657	Torsin-1B OS=Homo sapiens OX=9606 GN=TOR1B PE=1 SV=2	100	0	NP_055321.1	torsin-1B isoform 1 precursor [Homo sapiens]
Q8NFQ8	case1-VS-control	-2.24822	0.14258	-15.7682	8	2.61e-07	4.75e-06	Down	Q8NFQ8	Torsin-1A-interacting protein 2 OS=Homo sapiens OX=9606 GN=TOR1AIP2 PE=1 SV=1	100	0	NP_659471.1	torsin-1A-interacting protein 2 isoform b [Homo sapiens]
Q13547	case1-VS-control	-1.33917	0.0851037	-15.7358	8	2.66e-07	4.79e-06	Down	Q13547	Histone deacetylase 1 OS=Homo sapiens OX=9606 GN=HDAC1 PE=1 SV=1	100	0	NP_004955.2	histone deacetylase 1 [Homo sapiens]
Q9HDC9	case1-VS-control	-2.41996	0.153784	-15.7361	8	2.66e-07	4.79e-06	Down	Q9HDC9	Adipocyte plasma membrane-associated protein OS=Homo sapiens OX=9606 GN=APMAP PE=1 SV=2	100	0	BAB11885.1	BSCv, partial [Homo sapiens]
P06865	case1-VS-control	-1.40683	0.0897385	-15.677	8	2.74e-07	4.86e-06	Down	P06865	Beta-hexosaminidase subunit alpha OS=Homo sapiens OX=9606 GN=HEXA PE=1 SV=2	100	0	NP_000511.2	beta-hexosaminidase subunit alpha isoform 2 preproprotein [Homo sapiens]
P35221	case1-VS-control	-2.53842	0.162028	-15.6666	8	2.75e-07	4.86e-06	Down	P35221	Catenin alpha-1 OS=Homo sapiens OX=9606 GN=CTNNA1 PE=1 SV=1	100	0	NP_001894.2	catenin alpha-1 isoform 1 [Homo sapiens]
Q02388	case1-VS-control	2.08497	0.0836296	24.931	6	2.74e-07	4.86e-06	Up	Q02388	Collagen alpha-1(VII) chain OS=Homo sapiens OX=9606 GN=COL7A1 PE=1 SV=2	100	0	NP_000085.1	collagen alpha-1(VII) chain precursor [Homo sapiens]
Q5W111	case1-VS-control	-2.0736	0.132135	-15.6931	8	2.71e-07	4.86e-06	Down	Q5W111	SPRY domain-containing protein 7 OS=Homo sapiens OX=9606 GN=SPRYD7 PE=1 SV=2	100	1e-146	NP_065189.1	SPRY domain-containing protein 7 isoform 1 [Homo sapiens]
Q8WUD1	case1-VS-control	-2.8036	0.178936	-15.6682	8	2.75e-07	4.86e-06	Down	Q8WUD1	Ras-related protein Rab-2B OS=Homo sapiens OX=9606 GN=RAB2B PE=1 SV=1	100	2e-161	NP_116235.2	ras-related protein Rab-2B isoform 1 [Homo sapiens]
P50402	case1-VS-control	-2.05607	0.131399	-15.6475	8	2.78e-07	4.89e-06	Down	P50402	Emerin OS=Homo sapiens OX=9606 GN=EMD PE=1 SV=1	100	0	NP_000108.1	emerin [Homo sapiens]
P52888	case1-VS-control	4.6951	0.247199	18.9932	7	2.79e-07	4.89e-06	Up	P52888	Thimet oligopeptidase OS=Homo sapiens OX=9606 GN=THOP1 PE=1 SV=2	100	0	NP_003240.1	thimet oligopeptidase [Homo sapiens]
P11766	case1-VS-control	3.36281	0.177278	18.9692	7	2.81e-07	4.9e-06	Up	P11766	Alcohol dehydrogenase class-3 OS=Homo sapiens OX=9606 GN=ADH5 PE=1 SV=4	100	0	NP_000662.3	alcohol dehydrogenase class-3 [Homo sapiens]
P14625	case1-VS-control	-1.58233	0.10129	-15.6218	8	2.81e-07	4.9e-06	Down	P14625	Endoplasmin OS=Homo sapiens OX=9606 GN=HSP90B1 PE=1 SV=1	100	0	NP_003290.1	endoplasmin precursor [Homo sapiens]
Q13561	case1-VS-control	-1.22041	0.0781874	-15.6088	8	2.83e-07	4.91e-06	Down	Q13561	Dynactin subunit 2 OS=Homo sapiens OX=9606 GN=DCTN2 PE=1 SV=4	100	0	NP_001248342.1	dynactin subunit 2 isoform 3 [Homo sapiens]
P11047	case1-VS-control	-2.77447	0.177842	-15.6008	8	2.84e-07	4.91e-06	Down	P11047	Laminin subunit gamma-1 OS=Homo sapiens OX=9606 GN=LAMC1 PE=1 SV=3	100	0	NP_002284.3	laminin subunit gamma-1 precursor [Homo sapiens]
P52907	case1-VS-control	1.30046	0.0834062	15.5919	8	2.85e-07	4.91e-06	Up	P52907	F-actin-capping protein subunit alpha-1 OS=Homo sapiens OX=9606 GN=CAPZA1 PE=1 SV=3	100	0	NP_006126.1	F-actin-capping protein subunit alpha-1 [Homo sapiens]
P51610	case1-VS-control	-1.04058	0.0668462	-15.5668	8	2.89e-07	4.93e-06	Down	P51610	Host cell factor 1 OS=Homo sapiens OX=9606 GN=HCFC1 PE=1 SV=2	100	0	NP_005325.2	host cell factor 1 [Homo sapiens]
P62070	case1-VS-control	-1.73992	0.111827	-15.5591	8	2.9e-07	4.93e-06	Down	P62070	Ras-related protein R-Ras2 OS=Homo sapiens OX=9606 GN=RRAS2 PE=1 SV=1	100	2e-150	NP_036382.2	ras-related protein R-Ras2 isoform a [Homo sapiens]
Q5HYI8	case1-VS-control	-1.35707	0.0872613	-15.5518	8	2.91e-07	4.93e-06	Down	Q5HYI8	Rab-like protein 3 OS=Homo sapiens OX=9606 GN=RABL3 PE=1 SV=1	100	9e-176	NP_776186.2	rab-like protein 3 [Homo sapiens]
Q9NVS2	case1-VS-control	-2.72498	0.175022	-15.5694	8	2.89e-07	4.93e-06	Down	Q9NVS2	39S ribosomal protein S18a, mitochondrial OS=Homo sapiens OX=9606 GN=MRPS18A PE=1 SV=1	100	3e-142	NP_060605.1	39S ribosomal protein S18a, mitochondrial isoform 1 precursor [Homo sapiens]
P52948	case1-VS-control	-1.43351	0.0923581	-15.5212	8	2.96e-07	4.96e-06	Down	P52948	Nuclear pore complex protein Nup98-Nup96 OS=Homo sapiens OX=9606 GN=NUP98 PE=1 SV=4	100	0	P52948.4	RecName: Full=Nuclear pore complex protein Nup98-Nup96; Contains: RecName: Full=Nuclear pore complex protein Nup98; AltName: Full=98 kDa nucleoporin; AltName: Full=Nucleoporin Nup98; Short=Nup98; Contains: RecName: Full=Nuclear pore complex protein Nup96; AltName: Full=96 kDa nucleoporin; AltName: Full=Nucleoporin Nup96; Short=Nup96; Flags: Precursor
Q12959	case1-VS-control	-1.54972	0.0997964	-15.5288	8	2.94e-07	4.96e-06	Down	Q12959	Disks large homolog 1 OS=Homo sapiens OX=9606 GN=DLG1 PE=1 SV=2	100	0	NP_001091894.1	disks large homolog 1 isoform 1 [Homo sapiens]
Q9C0B1	case1-VS-control	3.24505	0.131769	24.6268	6	2.95e-07	4.96e-06	Up	Q9C0B1	Alpha-ketoglutarate-dependent dioxygenase FTO OS=Homo sapiens OX=9606 GN=FTO PE=1 SV=3	100	0	NP_001073901.1	alpha-ketoglutarate-dependent dioxygenase FTO [Homo sapiens]
Q8N128	case1-VS-control	-1.9299	0.12444	-15.5087	8	2.97e-07	4.97e-06	Down	Q8N128	Protein FAM177A1 OS=Homo sapiens OX=9606 GN=FAM177A1 PE=1 SV=1	100	1e-155	NP_775878.2	protein FAM177A1 isoform 1 precursor [Homo sapiens]
Q86UP2	case1-VS-control	-1.27169	0.0820703	-15.4951	8	3e-07	4.98e-06	Down	Q86UP2	Kinectin OS=Homo sapiens OX=9606 GN=KTN1 PE=1 SV=1	100	0	NP_001072989.1	kinectin isoform a [Homo sapiens]
P15924	case1-VS-control	3.31006	0.135215	24.4799	6	3.06e-07	5.03e-06	Up	P15924	Desmoplakin OS=Homo sapiens OX=9606 GN=DSP PE=1 SV=3	100	0	NP_004406.2	desmoplakin isoform I [Homo sapiens]
P51991	case1-VS-control	-2.35171	0.152157	-15.4558	8	3.05e-07	5.03e-06	Down	P51991	Heterogeneous nuclear ribonucleoprotein A3 OS=Homo sapiens OX=9606 GN=HNRNPA3 PE=1 SV=2	100	0	NP_919223.1	heterogeneous nuclear ribonucleoprotein A3 isoform a [Homo sapiens]
Q9UKL0	case1-VS-control	-1.05151	0.0679845	-15.4669	8	3.04e-07	5.03e-06	Down	Q9UKL0	REST corepressor 1 OS=Homo sapiens OX=9606 GN=RCOR1 PE=1 SV=2	100	0	NP_055971.2	REST corepressor 1 [Homo sapiens]
P46939	case1-VS-control	-2.54665	0.165025	-15.4319	8	3.09e-07	5.07e-06	Down	P46939	Utrophin OS=Homo sapiens OX=9606 GN=UTRN PE=1 SV=2	100	0	NP_009055.2	utrophin [Homo sapiens]
Q5JPE7	case1-VS-control	-1.5569	0.10116	-15.3905	8	3.16e-07	5.14e-06	Down	Q5JPE7	Nodal modulator 2 OS=Homo sapiens OX=9606 GN=NOMO2 PE=1 SV=1	100	0	NP_001004060.1	nodal modulator 2 isoform 1 precursor [Homo sapiens]
Q8NHP6	case1-VS-control	-1.86492	0.12118	-15.3897	8	3.16e-07	5.14e-06	Down	Q8NHP6	Motile sperm domain-containing protein 2 OS=Homo sapiens OX=9606 GN=MOSPD2 PE=1 SV=1	100	0	NP_689794.1	motile sperm domain-containing protein 2 isoform 1 [Homo sapiens]
P62873	case1-VS-control	-1.89564	0.123378	-15.3645	8	3.2e-07	5.19e-06	Down	P62873	Guanine nucleotide-binding protein G(I)/G(S)/G(T) subunit beta-1 OS=Homo sapiens OX=9606 GN=GNB1 PE=1 SV=3	100	0	NP_032168.1	guanine nucleotide-binding protein G(I)/G(S)/G(T) subunit beta-1 [Mus musculus]
Q5UIP0	case1-VS-control	-2.12223	0.138469	-15.3264	8	3.26e-07	5.27e-06	Down	Q5UIP0	Telomere-associated protein RIF1 OS=Homo sapiens OX=9606 GN=RIF1 PE=1 SV=2	100	0	NP_060621.3	telomere-associated protein RIF1 isoform 1 [Homo sapiens]
O15379	case1-VS-control	-1.13893	0.0744071	-15.3068	8	3.29e-07	5.28e-06	Down	O15379	Histone deacetylase 3 OS=Homo sapiens OX=9606 GN=HDAC3 PE=1 SV=2	100	0	NP_003874.2	histone deacetylase 3 isoform 2 [Homo sapiens]
O43847	case1-VS-control	3.86007	0.208322	18.5294	7	3.31e-07	5.28e-06	Up	O43847	Nardilysin OS=Homo sapiens OX=9606 GN=NRDC PE=1 SV=3	100	0	NP_001095132.1	nardilysin isoform b precursor [Homo sapiens]
P18031	case1-VS-control	-0.961023	0.0628053	-15.3016	8	3.3e-07	5.28e-06	None	P18031	Tyrosine-protein phosphatase non-receptor type 1 OS=Homo sapiens OX=9606 GN=PTPN1 PE=1 SV=1	100	0	NP_002818.1	tyrosine-protein phosphatase non-receptor type 1 isoform 1 [Homo sapiens]
P22392	case1-VS-control	4.18702	0.273767	15.2941	8	3.31e-07	5.28e-06	Up	P22392	Nucleoside diphosphate kinase B OS=Homo sapiens OX=9606 GN=NME2 PE=1 SV=1	100	2e-110	NP_002503.1	nucleoside diphosphate kinase B isoform a [Homo sapiens]
Q8IZL8	case1-VS-control	-1.92899	0.126234	-15.2811	8	3.34e-07	5.3e-06	Down	Q8IZL8	Proline-, glutamic acid- and leucine-rich protein 1 OS=Homo sapiens OX=9606 GN=PELP1 PE=1 SV=2	100	0	NP_055204.3	proline-, glutamic acid- and leucine-rich protein 1 isoform 1 [Homo sapiens]
Q9UNK0	case1-VS-control	-2.45085	0.101727	-24.0923	6	3.36e-07	5.32e-06	Down	Q9UNK0	Syntaxin-8 OS=Homo sapiens OX=9606 GN=STX8 PE=1 SV=2	100	4e-171	NP_004844.1	syntaxin-8 [Homo sapiens]
Q9H0D6	case1-VS-control	-1.16253	0.076226	-15.2511	8	3.39e-07	5.35e-06	Down	Q9H0D6	5'-3' exoribonuclease 2 OS=Homo sapiens OX=9606 GN=XRN2 PE=1 SV=1	100	0	NP_036387.2	5'-3' exoribonuclease 2 isoform 2 [Homo sapiens]
P84095	case1-VS-control	-0.933727	0.0612889	-15.2349	8	3.42e-07	5.37e-06	None	P84095	Rho-related GTP-binding protein RhoG OS=Homo sapiens OX=9606 GN=RHOG PE=1 SV=1	100	5e-142	OBS74645.1	hypothetical protein A6R68_14799 [Neotoma lepida]
Q13049	case1-VS-control	-1.67506	0.110066	-15.2187	8	3.44e-07	5.4e-06	Down	Q13049	E3 ubiquitin-protein ligase TRIM32 OS=Homo sapiens OX=9606 GN=TRIM32 PE=1 SV=2	100	0	NP_001093149.1	E3 ubiquitin-protein ligase TRIM32 [Homo sapiens]
P21964	case1-VS-control	-1.96946	0.129486	-15.2098	8	3.46e-07	5.4e-06	Down	P21964	Catechol O-methyltransferase OS=Homo sapiens OX=9606 GN=COMT PE=1 SV=2	100	0	NP_000745.1	catechol O-methyltransferase isoform MB-COMT [Homo sapiens]
P09622	case1-VS-control	-1.77504	0.116948	-15.178	8	3.52e-07	5.47e-06	Down	P09622	Dihydrolipoyl dehydrogenase, mitochondrial OS=Homo sapiens OX=9606 GN=DLD PE=1 SV=2	100	0	NP_000099.2	dihydrolipoyl dehydrogenase, mitochondrial isoform 1 precursor [Homo sapiens]
Q12981	case1-VS-control	-1.07385	0.070853	-15.156	8	3.56e-07	5.52e-06	Down	Q12981	Vesicle transport protein SEC20 OS=Homo sapiens OX=9606 GN=BNIP1 PE=1 SV=3	100	6e-165	NP_001196.2	vesicle transport protein SEC20 isoform BNIP1 [Homo sapiens]
Q8NHP8	case1-VS-control	-2.1157	0.139721	-15.1424	8	3.58e-07	5.54e-06	Down	Q8NHP8	Putative phospholipase B-like 2 OS=Homo sapiens OX=9606 GN=PLBD2 PE=1 SV=2	100	0	NP_775813.2	putative phospholipase B-like 2 isoform 1 precursor [Homo sapiens]
Q6ZRP7	case1-VS-control	-1.73527	0.114903	-15.1021	8	3.66e-07	5.63e-06	Down	Q6ZRP7	Sulfhydryl oxidase 2 OS=Homo sapiens OX=9606 GN=QSOX2 PE=1 SV=3	100	0	NP_859052.3	sulfhydryl oxidase 2 precursor [Homo sapiens]
P14678	case1-VS-control	-1.12659	0.0746802	-15.0855	8	3.69e-07	5.66e-06	Down	P14678	Small nuclear ribonucleoprotein-associated proteins B and B' OS=Homo sapiens OX=9606 GN=SNRPB PE=1 SV=2	99.583	1e-162	XP_011739653.1	PREDICTED: small nuclear ribonucleoprotein-associated proteins B and B' isoform X1 [Macaca nemestrina]
A6NDG6	case1-VS-control	3.64877	0.154019	23.6904	6	3.71e-07	5.68e-06	Up	A6NDG6	Glycerol-3-phosphate phosphatase OS=Homo sapiens OX=9606 GN=PGP PE=1 SV=1	100	0	NP_001035830.1	glycerol-3-phosphate phosphatase [Homo sapiens]
Q9Y680	case1-VS-control	-2.38347	0.158664	-15.0221	8	3.81e-07	5.81e-06	Down	Q9Y680	Peptidyl-prolyl cis-trans isomerase FKBP7 OS=Homo sapiens OX=9606 GN=FKBP7 PE=1 SV=2	100	1e-165	NP_851939.1	peptidyl-prolyl cis-trans isomerase FKBP7 isoform a precursor [Homo sapiens]
Q86TX2	case1-VS-control	-2.53516	0.169052	-14.9963	8	3.86e-07	5.87e-06	Down	Q86TX2	Acyl-coenzyme A thioesterase 1 OS=Homo sapiens OX=9606 GN=ACOT1 PE=1 SV=1	100	0	NP_001032238.1	acyl-coenzyme A thioesterase 1 [Homo sapiens]
P63027	case1-VS-control	-1.20452	0.0803975	-14.9821	8	3.89e-07	5.89e-06	Down	P63027	Vesicle-associated membrane protein 2 OS=Homo sapiens OX=9606 GN=VAMP2 PE=1 SV=3	100	5e-80	NP_001027992.1	vesicle-associated membrane protein 2 [Macaca mulatta]
Q9Y394	case1-VS-control	-1.24155	0.0829504	-14.9674	8	3.92e-07	5.92e-06	Down	Q9Y394	Dehydrogenase/reductase SDR family member 7 OS=Homo sapiens OX=9606 GN=DHRS7 PE=1 SV=1	100	0	NP_057113.1	dehydrogenase/reductase SDR family member 7 isoform 1 precursor [Homo sapiens]
O95470	case1-VS-control	-1.86283	0.124746	-14.933	8	3.99e-07	5.98e-06	Down	O95470	Sphingosine-1-phosphate lyase 1 OS=Homo sapiens OX=9606 GN=SGPL1 PE=1 SV=3	100	0	NP_003892.2	sphingosine-1-phosphate lyase 1 [Homo sapiens]
P46934	case1-VS-control	3.02754	0.202685	14.9372	8	3.98e-07	5.98e-06	Up	P46934	E3 ubiquitin-protein ligase NEDD4 OS=Homo sapiens OX=9606 GN=NEDD4 PE=1 SV=4	100	0	NP_001271267.1	E3 ubiquitin-protein ligase NEDD4 isoform 3 [Homo sapiens]
O60934	case1-VS-control	-2.16631	0.145215	-14.9179	8	4.02e-07	6.01e-06	Down	O60934	Nibrin OS=Homo sapiens OX=9606 GN=NBN PE=1 SV=1	100	0	NP_002476.2	nibrin isoform 1 [Homo sapiens]
Q9HCN8	case1-VS-control	-1.50621	0.10113	-14.8937	8	4.07e-07	6.07e-06	Down	Q9HCN8	Stromal cell-derived factor 2-like protein 1 OS=Homo sapiens OX=9606 GN=SDF2L1 PE=1 SV=2	100	2e-161	NP_071327.2	stromal cell-derived factor 2-like protein 1 precursor [Homo sapiens]
Q86W92	case1-VS-control	-1.04417	0.070194	-14.8754	8	4.11e-07	6.11e-06	Down	Q86W92	Liprin-beta-1 OS=Homo sapiens OX=9606 GN=PPFIBP1 PE=1 SV=2	100	0	Q86W92.2	RecName: Full=Liprin-beta-1; AltName: Full=Protein tyrosine phosphatase receptor type f polypeptide-interacting protein-binding protein 1; Short=PTPRF-interacting protein-binding protein 1; AltName: Full=hSGT2
P04004	case1-VS-control	-3.57586	0.240935	-14.8416	8	4.18e-07	6.19e-06	Down	P04004	Vitronectin OS=Homo sapiens OX=9606 GN=VTN PE=1 SV=1	100	0	NP_000629.3	vitronectin precursor [Homo sapiens]
P84090	case1-VS-control	-1.4054	0.0947412	-14.8341	8	4.2e-07	6.2e-06	Down	P84090	Enhancer of rudimentary homolog OS=Homo sapiens OX=9606 GN=ERH PE=1 SV=1	100	7e-75	XP_004477384.1	PREDICTED: enhancer of rudimentary homolog [Dasypus novemcinctus]
Q12888	case1-VS-control	-2.28495	0.154551	-14.7844	8	4.31e-07	6.3e-06	Down	Q12888	TP53-binding protein 1 OS=Homo sapiens OX=9606 GN=TP53BP1 PE=1 SV=2	100	0	NP_005648.1	TP53-binding protein 1 isoform 3 [Homo sapiens]
Q5U5X0	case1-VS-control	-2.67658	0.181041	-14.7844	8	4.31e-07	6.3e-06	Down	Q5U5X0	Complex III assembly factor LYRM7 OS=Homo sapiens OX=9606 GN=LYRM7 PE=1 SV=1	100	4e-71	NP_859056.2	complex III assembly factor LYRM7 isoform 1 [Homo sapiens]
Q96KR1	case1-VS-control	-1.01854	0.0688362	-14.7966	8	4.28e-07	6.3e-06	Down	Q96KR1	Zinc finger RNA-binding protein OS=Homo sapiens OX=9606 GN=ZFR PE=1 SV=2	100	0	NP_057191.2	zinc finger RNA-binding protein [Homo sapiens]
P17152	case1-VS-control	-2.08019	0.140991	-14.7541	8	4.38e-07	6.38e-06	Down	P17152	Transmembrane protein 11, mitochondrial OS=Homo sapiens OX=9606 GN=TMEM11 PE=1 SV=1	100	6e-141	NP_003867.1	transmembrane protein 11, mitochondrial [Homo sapiens]
P00167	case1-VS-control	-3.05848	0.207517	-14.7384	8	4.42e-07	6.41e-06	Down	P00167	Cytochrome b5 OS=Homo sapiens OX=9606 GN=CYB5A PE=1 SV=2	100	7e-96	NP_683725.1	cytochrome b5 isoform 1 [Homo sapiens]
Q9UNN5	case1-VS-control	3.48522	0.196443	17.7416	7	4.46e-07	6.45e-06	Up	Q9UNN5	FAS-associated factor 1 OS=Homo sapiens OX=9606 GN=FAF1 PE=1 SV=2	100	0	NP_008982.1	FAS-associated factor 1 [Homo sapiens]
Q5TA45	case1-VS-control	-1.11412	0.075764	-14.7051	8	4.49e-07	6.49e-06	Down	Q5TA45	Integrator complex subunit 11 OS=Homo sapiens OX=9606 GN=INTS11 PE=1 SV=2	100	0	NP_060341.2	integrator complex subunit 11 isoform 2 [Homo sapiens]
Q6NUQ4	case1-VS-control	-1.11659	0.076106	-14.6715	8	4.57e-07	6.58e-06	Down	Q6NUQ4	Transmembrane protein 214 OS=Homo sapiens OX=9606 GN=TMEM214 PE=1 SV=2	100	0	NP_060197.4	transmembrane protein 214 isoform 1 [Homo sapiens]
O75394	case1-VS-control	-1.64905	0.112541	-14.6529	8	4.62e-07	6.61e-06	Down	O75394	39S ribosomal protein L33, mitochondrial OS=Homo sapiens OX=9606 GN=MRPL33 PE=1 SV=1	100	1e-39	NP_004882.1	39S ribosomal protein L33, mitochondrial isoform a [Homo sapiens]
O95453	case1-VS-control	-1.30013	0.0887397	-14.6511	8	4.62e-07	6.61e-06	Down	O95453	Poly(A)-specific ribonuclease PARN OS=Homo sapiens OX=9606 GN=PARN PE=1 SV=1	100	0	NP_002573.1	poly(A)-specific ribonuclease PARN isoform 1 [Homo sapiens]
P53701	case1-VS-control	-1.34943	0.0924362	-14.5985	8	4.75e-07	6.78e-06	Down	P53701	Cytochrome c-type heme lyase OS=Homo sapiens OX=9606 GN=HCCS PE=1 SV=1	100	0	NP_005324.3	cytochrome c-type heme lyase [Homo sapiens]
O43920	case1-VS-control	-1.36344	0.0935577	-14.5733	8	4.82e-07	6.82e-06	Down	O43920	NADH dehydrogenase [ubiquinone] iron-sulfur protein 5 OS=Homo sapiens OX=9606 GN=NDUFS5 PE=1 SV=3	100	3e-74	NP_004543.1	NADH dehydrogenase [ubiquinone] iron-sulfur protein 5 [Homo sapiens]
P14314	case1-VS-control	-1.72433	0.1183	-14.5759	8	4.81e-07	6.82e-06	Down	P14314	Glucosidase 2 subunit beta OS=Homo sapiens OX=9606 GN=PRKCSH PE=1 SV=2	100	0	NP_002734.2	glucosidase 2 subunit beta isoform 1 precursor [Homo sapiens]
Q9NWU5	case1-VS-control	-1.46469	0.100542	-14.5679	8	4.83e-07	6.82e-06	Down	Q9NWU5	39S ribosomal protein L22, mitochondrial OS=Homo sapiens OX=9606 GN=MRPL22 PE=1 SV=1	100	2e-152	NP_054899.2	39S ribosomal protein L22, mitochondrial isoform a [Homo sapiens]
P14550	case1-VS-control	3.63507	0.250353	14.5198	8	4.96e-07	6.89e-06	Up	P14550	Alcohol dehydrogenase [NADP(+)] OS=Homo sapiens OX=9606 GN=AKR1A1 PE=1 SV=3	100	0	NP_006057.1	alcohol dehydrogenase [NADP(+)] [Homo sapiens]
P98175	case1-VS-control	-1.12233	0.077369	-14.5062	8	4.99e-07	6.89e-06	Down	P98175	RNA-binding protein 10 OS=Homo sapiens OX=9606 GN=RBM10 PE=1 SV=3	100	0	NP_005667.2	RNA-binding protein 10 isoform 1 [Homo sapiens]
Q06787	case1-VS-control	-2.28441	0.15735	-14.518	8	4.96e-07	6.89e-06	Down	Q06787	Synaptic functional regulator FMR1 OS=Homo sapiens OX=9606 GN=FMR1 PE=1 SV=1	100	0	NP_002015.1	synaptic functional regulator FMR1 isoform ISO1 [Homo sapiens]
Q13330	case1-VS-control	-2.23181	0.153851	-14.5063	8	4.99e-07	6.89e-06	Down	Q13330	Metastasis-associated protein MTA1 OS=Homo sapiens OX=9606 GN=MTA1 PE=1 SV=2	100	0	NP_004680.2	metastasis-associated protein MTA1 isoform MTA1 [Homo sapiens]
Q709C8	case1-VS-control	-1.97803	0.136489	-14.4922	8	5.03e-07	6.89e-06	Down	Q709C8	Vacuolar protein sorting-associated protein 13C OS=Homo sapiens OX=9606 GN=VPS13C PE=1 SV=1	100	0	NP_065872.1	vacuolar protein sorting-associated protein 13C isoform 2A [Homo sapiens]
Q8IXM3	case1-VS-control	-1.86803	0.128892	-14.493	8	5.03e-07	6.89e-06	Down	Q8IXM3	39S ribosomal protein L41, mitochondrial OS=Homo sapiens OX=9606 GN=MRPL41 PE=1 SV=1	100	5e-96	NP_115866.1	39S ribosomal protein L41, mitochondrial [Homo sapiens]
Q8TEM1	case1-VS-control	1.37947	0.0611002	22.5771	6	4.94e-07	6.89e-06	Up	Q8TEM1	Nuclear pore membrane glycoprotein 210 OS=Homo sapiens OX=9606 GN=NUP210 PE=1 SV=3	100	0	NP_079199.2	nuclear pore membrane glycoprotein 210 precursor [Homo sapiens]
Q9H2H9	case1-VS-control	1.07388	0.0739251	14.5266	8	4.94e-07	6.89e-06	Up	Q9H2H9	Sodium-coupled neutral amino acid transporter 1 OS=Homo sapiens OX=9606 GN=SLC38A1 PE=1 SV=1	100	0	NP_109599.3	sodium-coupled neutral amino acid transporter 1 isoform 1 [Homo sapiens]
Q9NZI8	case1-VS-control	0.667916	0.029655	22.5229	6	5.01e-07	6.89e-06	None	Q9NZI8	Insulin-like growth factor 2 mRNA-binding protein 1 OS=Homo sapiens OX=9606 GN=IGF2BP1 PE=1 SV=2	100	0	NP_006537.3	insulin-like growth factor 2 mRNA-binding protein 1 isoform 1 [Homo sapiens]
Q9Y399	case1-VS-control	-1.49563	0.103068	-14.5111	8	4.98e-07	6.89e-06	Down	Q9Y399	28S ribosomal protein S2, mitochondrial OS=Homo sapiens OX=9606 GN=MRPS2 PE=1 SV=1	100	0	NP_057118.1	28S ribosomal protein S2, mitochondrial [Homo sapiens]
O15126	case1-VS-control	-2.16421	0.149741	-14.453	8	5.14e-07	6.97e-06	Down	O15126	Secretory carrier-associated membrane protein 1 OS=Homo sapiens OX=9606 GN=SCAMP1 PE=1 SV=2	100	0	NP_004857.4	secretory carrier-associated membrane protein 1 isoform 1 [Homo sapiens]
Q8TC12	case1-VS-control	-1.36213	0.0942242	-14.4563	8	5.13e-07	6.97e-06	Down	Q8TC12	Retinol dehydrogenase 11 OS=Homo sapiens OX=9606 GN=RDH11 PE=1 SV=2	100	0	NP_057110.3	retinol dehydrogenase 11 isoform 1 precursor [Homo sapiens]
Q96BM9	case1-VS-control	-0.900904	0.0623237	-14.4552	8	5.13e-07	6.97e-06	None	Q96BM9	ADP-ribosylation factor-like protein 8A OS=Homo sapiens OX=9606 GN=ARL8A PE=1 SV=1	100	9e-137	NP_620150.1	ADP-ribosylation factor-like protein 8A isoform 1 [Homo sapiens]
Q9BWS9	case1-VS-control	-2.57581	0.178811	-14.4052	8	5.27e-07	7.13e-06	Down	Q9BWS9	Chitinase domain-containing protein 1 OS=Homo sapiens OX=9606 GN=CHID1 PE=1 SV=1	100	0	NP_076436.3	chitinase domain-containing protein 1 isoform a precursor [Homo sapiens]
O14776	case1-VS-control	-1.26133	0.0876422	-14.3918	8	5.31e-07	7.14e-06	Down	O14776	Transcription elongation regulator 1 OS=Homo sapiens OX=9606 GN=TCERG1 PE=1 SV=2	100	0	NP_006697.2	transcription elongation regulator 1 isoform 1 [Homo sapiens]
P33527	case1-VS-control	-1.15244	0.0800787	-14.3914	8	5.31e-07	7.14e-06	Down	P33527	Multidrug resistance-associated protein 1 OS=Homo sapiens OX=9606 GN=ABCC1 PE=1 SV=3	100	0	NP_004987.2	multidrug resistance-associated protein 1 [Homo sapiens]
Q9BQC6	case1-VS-control	-1.65355	0.114955	-14.3843	8	5.33e-07	7.15e-06	Down	Q9BQC6	Ribosomal protein 63, mitochondrial OS=Homo sapiens OX=9606 GN=MRPL57 PE=1 SV=1	100	4e-70	NP_076931.1	ribosomal protein 63, mitochondrial [Homo sapiens]
Q8NC54	case1-VS-control	-1.97917	0.137645	-14.3788	8	5.35e-07	7.15e-06	Down	Q8NC54	Keratinocyte-associated transmembrane protein 2 OS=Homo sapiens OX=9606 GN=KCT2 PE=1 SV=2	100	0	NP_064584.1	keratinocyte-associated transmembrane protein 2 precursor [Homo sapiens]
O94973	case1-VS-control	-1.40684	0.098316	-14.3094	8	5.55e-07	7.4e-06	Down	O94973	AP-2 complex subunit alpha-2 OS=Homo sapiens OX=9606 GN=AP2A2 PE=1 SV=2	100	0	NP_036437.1	AP-2 complex subunit alpha-2 isoform 2 [Homo sapiens]
Q9BSH5	case1-VS-control	-2.72792	0.190857	-14.293	8	5.6e-07	7.44e-06	Down	Q9BSH5	Haloacid dehalogenase-like hydrolase domain-containing protein 3 OS=Homo sapiens OX=9606 GN=HDHD3 PE=1 SV=1	100	0	NP_112496.1	haloacid dehalogenase-like hydrolase domain-containing protein 3 [Homo sapiens]
Q9HD45	case1-VS-control	-2.43469	0.17038	-14.2898	8	5.61e-07	7.44e-06	Down	Q9HD45	Transmembrane 9 superfamily member 3 OS=Homo sapiens OX=9606 GN=TM9SF3 PE=1 SV=2	100	0	NP_064508.3	transmembrane 9 superfamily member 3 precursor [Homo sapiens]
Q99523	case1-VS-control	-2.44528	0.17131	-14.274	8	5.66e-07	7.48e-06	Down	Q99523	Sortilin OS=Homo sapiens OX=9606 GN=SORT1 PE=1 SV=3	100	0	NP_002950.3	sortilin isoform 1 preproprotein [Homo sapiens]
P30101	case1-VS-control	-1.28287	0.0900183	-14.2512	8	5.73e-07	7.55e-06	Down	P30101	Protein disulfide-isomerase A3 OS=Homo sapiens OX=9606 GN=PDIA3 PE=1 SV=4	100	0	NP_005304.3	protein disulfide-isomerase A3 precursor [Homo sapiens]
Q92945	case1-VS-control	-1.2297	0.0863415	-14.2423	8	5.76e-07	7.56e-06	Down	Q92945	Far upstream element-binding protein 2 OS=Homo sapiens OX=9606 GN=KHSRP PE=1 SV=4	100	0	NP_003676.2	far upstream element-binding protein 2 [Homo sapiens]
Q8NHH9	case1-VS-control	-1.96241	0.138092	-14.2109	8	5.85e-07	7.67e-06	Down	Q8NHH9	Atlastin-2 OS=Homo sapiens OX=9606 GN=ATL2 PE=1 SV=2	100	0	NP_001129145.1	atlastin-2 isoform 2 [Homo sapiens]
P15328	case1-VS-control	5.85625	0.184843	31.6824	5	5.88e-07	7.69e-06	Up	P15328	Folate receptor alpha OS=Homo sapiens OX=9606 GN=FOLR1 PE=1 SV=3	100	0	NP_000793.1	folate receptor alpha precursor [Homo sapiens]
P62491	case1-VS-control	-1.33849	0.094321	-14.1908	8	5.92e-07	7.71e-06	Down	P62491;Q15907	Ras-related protein Rab-11A OS=Homo sapiens OX=9606 GN=RAB11A PE=1 SV=3	100	2e-161	NP_004654.1	ras-related protein Rab-11A isoform 1 [Homo sapiens]
O43852	case1-VS-control	-2.17494	0.153336	-14.1842	8	5.94e-07	7.72e-06	Down	O43852	Calumenin OS=Homo sapiens OX=9606 GN=CALU PE=1 SV=2	100	0	NP_001186600.1	calumenin isoform c precursor [Homo sapiens]
Q4U2R6	case1-VS-control	-2.11713	0.149484	-14.1629	8	6.01e-07	7.79e-06	Down	Q4U2R6	39S ribosomal protein L51, mitochondrial OS=Homo sapiens OX=9606 GN=MRPL51 PE=1 SV=1	100	7e-89	NP_057581.2	39S ribosomal protein L51, mitochondrial [Homo sapiens]
P13747	case1-VS-control	-1.91138	0.135023	-14.1559	8	6.03e-07	7.79e-06	Down	P13747	HLA class I histocompatibility antigen, alpha chain E OS=Homo sapiens OX=9606 GN=HLA-E PE=1 SV=3	100	0	P13747.3	RecName: Full=HLA class I histocompatibility antigen, alpha chain E; AltName: Full=MHC class I antigen E; Flags: Precursor
P30530	case1-VS-control	-2.09171	0.0958681	-21.8186	6	6.05e-07	7.79e-06	Down	P30530	Tyrosine-protein kinase receptor UFO OS=Homo sapiens OX=9606 GN=AXL PE=1 SV=4	100	0	NP_068713.2	tyrosine-protein kinase receptor UFO isoform 1 precursor [Homo sapiens]
Q9BZG8	case1-VS-control	5.46884	0.0975733	56.0486	4	6.07e-07	7.79e-06	Up	Q9BZG8	2-(3-amino-3-carboxypropyl)histidine synthase subunit 1 OS=Homo sapiens OX=9606 GN=DPH1 PE=1 SV=2	100	0	NP_001374.3	2-(3-amino-3-carboxypropyl)histidine synthase subunit 1 isoform 1 [Homo sapiens]
P36551	case1-VS-control	-1.35882	0.0961288	-14.1354	8	6.1e-07	7.81e-06	Down	P36551	Oxygen-dependent coproporphyrinogen-III oxidase, mitochondrial OS=Homo sapiens OX=9606 GN=CPOX PE=1 SV=3	100	0	NP_000088.3	oxygen-dependent coproporphyrinogen-III oxidase, mitochondrial precursor [Homo sapiens]
Q15061	case1-VS-control	-1.44977	0.102784	-14.1051	8	6.2e-07	7.91e-06	Down	Q15061	WD repeat-containing protein 43 OS=Homo sapiens OX=9606 GN=WDR43 PE=1 SV=3	100	0	NP_055946.1	WD repeat-containing protein 43 [Homo sapiens]
Q7Z7H8	case1-VS-control	-1.79159	0.127048	-14.1016	8	6.21e-07	7.91e-06	Down	Q7Z7H8	39S ribosomal protein L10, mitochondrial OS=Homo sapiens OX=9606 GN=MRPL10 PE=1 SV=3	100	0	NP_660298.2	39S ribosomal protein L10, mitochondrial isoform a precursor [Homo sapiens]
Q96CM8	case1-VS-control	-4.33327	0.307374	-14.0977	8	6.23e-07	7.91e-06	Down	Q96CM8	Acyl-CoA synthetase family member 2, mitochondrial OS=Homo sapiens OX=9606 GN=ACSF2 PE=1 SV=2	100	0	NP_079425.3	acyl-CoA synthetase family member 2, mitochondrial isoform 2 precursor [Homo sapiens]
Q9BZI7	case1-VS-control	2.06812	0.122502	16.8824	7	6.27e-07	7.94e-06	Up	Q9BZI7	Regulator of nonsense transcripts 3B OS=Homo sapiens OX=9606 GN=UPF3B PE=1 SV=1	100	0	NP_542199.1	regulator of nonsense transcripts 3B isoform 1 [Homo sapiens]
P54886	case1-VS-control	-1.63921	0.116439	-14.0779	8	6.3e-07	7.95e-06	Down	P54886	Delta-1-pyrroline-5-carboxylate synthase OS=Homo sapiens OX=9606 GN=ALDH18A1 PE=1 SV=2	100	0	NP_002851.2	delta-1-pyrroline-5-carboxylate synthase isoform 1 [Homo sapiens]
Q9BV81	case1-VS-control	-1.8749	0.133347	-14.0603	8	6.36e-07	8.01e-06	Down	Q9BV81	ER membrane protein complex subunit 6 OS=Homo sapiens OX=9606 GN=EMC6 PE=1 SV=1	100	4e-72	NP_079594.1	ER membrane protein complex subunit 6 [Mus musculus]
O43752	case1-VS-control	-1.54822	0.110195	-14.0498	8	6.39e-07	8.03e-06	Down	O43752	Syntaxin-6 OS=Homo sapiens OX=9606 GN=STX6 PE=1 SV=1	100	0	NP_005810.1	syntaxin-6 isoform 1 [Homo sapiens]
Q6RFH5	case1-VS-control	-0.729751	0.05212	-14.0014	8	6.57e-07	8.23e-06	None	Q6RFH5	WD repeat-containing protein 74 OS=Homo sapiens OX=9606 GN=WDR74 PE=1 SV=1	100	0	NP_060563.2	WD repeat-containing protein 74 isoform 1 [Homo sapiens]
Q96HQ2	case1-VS-control	-2.21399	0.158185	-13.9962	8	6.58e-07	8.23e-06	Down	Q96HQ2	CDKN2AIP N-terminal-like protein OS=Homo sapiens OX=9606 GN=CDKN2AIPNL PE=1 SV=1	100	9e-82	NP_542387.1	CDKN2AIP N-terminal-like protein [Homo sapiens]
Q8N465	case1-VS-control	-3.52183	0.252623	-13.941	8	6.79e-07	8.46e-06	Down	Q8N465	D-2-hydroxyglutarate dehydrogenase, mitochondrial OS=Homo sapiens OX=9606 GN=D2HGDH PE=1 SV=3	100	0	NP_689996.4	D-2-hydroxyglutarate dehydrogenase, mitochondrial isoform 1 precursor [Homo sapiens]
P54136	case1-VS-control	1.62063	0.116496	13.9115	8	6.9e-07	8.55e-06	Up	P54136	Arginine--tRNA ligase, cytoplasmic OS=Homo sapiens OX=9606 GN=RARS PE=1 SV=2	100	0	NP_002878.2	arginine--tRNA ligase, cytoplasmic [Homo sapiens]
Q9H7E9	case1-VS-control	2.70023	0.194057	13.9146	8	6.89e-07	8.55e-06	Up	Q9H7E9	UPF0488 protein C8orf33 OS=Homo sapiens OX=9606 GN=C8orf33 PE=1 SV=1	100	3e-166	NP_075568.1	UPF0488 protein C8orf33 [Homo sapiens]
Q6DKK2	case1-VS-control	-1.81069	0.108959	-16.6182	7	6.98e-07	8.63e-06	Down	Q6DKK2	Tetratricopeptide repeat protein 19, mitochondrial OS=Homo sapiens OX=9606 GN=TTC19 PE=1 SV=4	100	0	NP_060245.3	tetratricopeptide repeat protein 19, mitochondrial isoform 1 precursor [Homo sapiens]
P42785	case1-VS-control	-2.07334	0.149467	-13.8716	8	7.06e-07	8.67e-06	Down	P42785	Lysosomal Pro-X carboxypeptidase OS=Homo sapiens OX=9606 GN=PRCP PE=1 SV=1	100	0	NP_005031.1	lysosomal Pro-X carboxypeptidase isoform 1 preproprotein [Homo sapiens]
Q9NW38	case1-VS-control	-0.890914	0.0418843	-21.2708	6	7.04e-07	8.67e-06	None	Q9NW38	E3 ubiquitin-protein ligase FANCL OS=Homo sapiens OX=9606 GN=FANCL PE=1 SV=2	100	0	NP_060532.2	E3 ubiquitin-protein ligase FANCL isoform 2 [Homo sapiens]
P49790	case1-VS-control	-1.06972	0.0772133	-13.8541	8	7.12e-07	8.73e-06	Down	P49790	Nuclear pore complex protein Nup153 OS=Homo sapiens OX=9606 GN=NUP153 PE=1 SV=2	100	0	NP_005115.2	nuclear pore complex protein Nup153 isoform 2 [Homo sapiens]
O43399	case1-VS-control	0.619938	0.0447861	13.8422	8	7.17e-07	8.75e-06	None	O43399	Tumor protein D54 OS=Homo sapiens OX=9606 GN=TPD52L2 PE=1 SV=2	100	1e-148	NP_003279.2	tumor protein D54 isoform e [Homo sapiens]
Q9NRP0	case1-VS-control	-1.54836	0.111869	-13.8408	8	7.18e-07	8.75e-06	Down	Q9NRP0	Oligosaccharyltransferase complex subunit OSTC OS=Homo sapiens OX=9606 GN=OSTC PE=1 SV=1	99.329	6e-105	XP_012421655.1	PREDICTED: oligosaccharyltransferase complex subunit OSTC isoform X1 [Odobenus rosmarus divergens]
Q9H0X4	case1-VS-control	-2.09932	0.151945	-13.8163	8	7.28e-07	8.85e-06	Down	Q9H0X4	Protein FAM234A OS=Homo sapiens OX=9606 GN=FAM234A PE=1 SV=1	100	0	NP_114428.1	protein FAM234A [Homo sapiens]
Q14108	case1-VS-control	-1.59482	0.115488	-13.8094	8	7.3e-07	8.86e-06	Down	Q14108	Lysosome membrane protein 2 OS=Homo sapiens OX=9606 GN=SCARB2 PE=1 SV=2	100	0	NP_005497.1	lysosome membrane protein 2 isoform 1 precursor [Homo sapiens]
Q92522	case1-VS-control	-2.38589	0.172931	-13.7968	8	7.36e-07	8.9e-06	Down	Q92522	Histone H1x OS=Homo sapiens OX=9606 GN=H1FX PE=1 SV=1	100	3e-146	NP_006017.1	histone H1x [Homo sapiens]
Q9BVI4	case1-VS-control	-1.01812	0.0739757	-13.7629	8	7.5e-07	9.04e-06	Down	Q9BVI4	Nucleolar complex protein 4 homolog OS=Homo sapiens OX=9606 GN=NOC4L PE=1 SV=1	100	0	NP_076983.1	nucleolar complex protein 4 homolog [Homo sapiens]
P08237	case1-VS-control	2.49016	0.181119	13.7488	8	7.56e-07	9.09e-06	Up	P08237	ATP-dependent 6-phosphofructokinase, muscle type OS=Homo sapiens OX=9606 GN=PFKM PE=1 SV=2	100	0	NP_001341664.1	ATP-dependent 6-phosphofructokinase, muscle type isoform 3 [Homo sapiens]
P00367	case1-VS-control	-1.7026	0.124059	-13.724	8	7.66e-07	9.19e-06	Down	P00367	Glutamate dehydrogenase 1, mitochondrial OS=Homo sapiens OX=9606 GN=GLUD1 PE=1 SV=2	100	0	NP_005262.1	glutamate dehydrogenase 1, mitochondrial isoform a precursor [Homo sapiens]
O43290	case1-VS-control	-1.18819	0.0866391	-13.7143	8	7.7e-07	9.22e-06	Down	O43290	U4/U6.U5 tri-snRNP-associated protein 1 OS=Homo sapiens OX=9606 GN=SART1 PE=1 SV=1	100	0	NP_005137.1	U4/U6.U5 tri-snRNP-associated protein 1 [Homo sapiens]
Q07021	case1-VS-control	-1.91692	0.139865	-13.7055	8	7.74e-07	9.24e-06	Down	Q07021	Complement component 1 Q subcomponent-binding protein, mitochondrial OS=Homo sapiens OX=9606 GN=C1QBP PE=1 SV=1	100	0	NP_001203.1	complement component 1 Q subcomponent-binding protein, mitochondrial precursor [Homo sapiens]
P04920	case1-VS-control	3.33757	0.244227	13.6659	8	7.92e-07	9.43e-06	Up	P04920	Anion exchange protein 2 OS=Homo sapiens OX=9606 GN=SLC4A2 PE=1 SV=4	100	0	BAD92395.1	Anion exchanger 2 type a variant, partial [Homo sapiens]
P13807	case1-VS-control	2.14098	0.156941	13.6419	8	8.02e-07	9.48e-06	Up	P13807	Glycogen [starch] synthase, muscle OS=Homo sapiens OX=9606 GN=GYS1 PE=1 SV=2	100	0	NP_002094.2	glycogen [starch] synthase, muscle isoform 1 [Homo sapiens]
Q4VC31	case1-VS-control	-0.861473	0.0631353	-13.6449	8	8.01e-07	9.48e-06	None	Q4VC31	Coiled-coil domain-containing protein 58 OS=Homo sapiens OX=9606 GN=CCDC58 PE=1 SV=1	100	7e-104	NP_001017928.1	coiled-coil domain-containing protein 58 isoform 1 [Homo sapiens]
Q92542	case1-VS-control	-1.24503	0.0912938	-13.6377	8	8.04e-07	9.48e-06	Down	Q92542	Nicastrin OS=Homo sapiens OX=9606 GN=NCSTN PE=1 SV=2	100	0	NP_056146.1	nicastrin isoform 1 precursor [Homo sapiens]
Q9H9P8	case1-VS-control	-2.2228	0.136555	-16.2778	7	8.04e-07	9.48e-06	Down	Q9H9P8	L-2-hydroxyglutarate dehydrogenase, mitochondrial OS=Homo sapiens OX=9606 GN=L2HGDH PE=1 SV=3	100	0	NP_079160.1	L-2-hydroxyglutarate dehydrogenase, mitochondrial precursor [Homo sapiens]
Q9HAV0	case1-VS-control	-2.64725	0.12766	-20.7368	6	8.19e-07	9.62e-06	Down	Q9HAV0	Guanine nucleotide-binding protein subunit beta-4 OS=Homo sapiens OX=9606 GN=GNB4 PE=1 SV=3	100	0	NP_067642.1	guanine nucleotide-binding protein subunit beta-4 [Homo sapiens]
P50225	case1-VS-control	3.5756	0.1726	20.7161	6	8.23e-07	9.65e-06	Up	P50225	Sulfotransferase 1A1 OS=Homo sapiens OX=9606 GN=SULT1A1 PE=1 SV=3	100	0	NP_001046.2	sulfotransferase 1A1 isoform a [Homo sapiens]
O00746	case1-VS-control	-2.806	0.173131	-16.2073	7	8.28e-07	9.69e-06	Down	O00746	Nucleoside diphosphate kinase, mitochondrial OS=Homo sapiens OX=9606 GN=NME4 PE=1 SV=1	100	4e-134	NP_005000.1	nucleoside diphosphate kinase, mitochondrial isoform a precursor [Homo sapiens]
Q8N6M3	case1-VS-control	-1.35774	0.100046	-13.5711	8	8.35e-07	9.74e-06	Down	Q8N6M3	Fat storage-inducing transmembrane protein 2 OS=Homo sapiens OX=9606 GN=FITM2 PE=2 SV=1	100	0	NP_001073941.1	fat storage-inducing transmembrane protein 2 [Homo sapiens]
P08648	case1-VS-control	-1.16257	0.0863412	-13.4649	8	8.87e-07	1.01e-05	Down	P08648	Integrin alpha-5 OS=Homo sapiens OX=9606 GN=ITGA5 PE=1 SV=2	100	0	EAW96781.1	integrin, alpha 5 (fibronectin receptor, alpha polypeptide), isoform CRA_b [Homo sapiens]
P12109	case1-VS-control	-3.10862	0.151648	-20.4989	6	8.76e-07	1.01e-05	Down	P12109	Collagen alpha-1(VI) chain OS=Homo sapiens OX=9606 GN=COL6A1 PE=1 SV=3	100	0	NP_001839.2	collagen alpha-1(VI) chain precursor [Homo sapiens]
P32004	case1-VS-control	-1.24287	0.092334	-13.4606	8	8.89e-07	1.01e-05	Down	P32004	Neural cell adhesion molecule L1 OS=Homo sapiens OX=9606 GN=L1CAM PE=1 SV=2	100	0	NP_000416.1	neural cell adhesion molecule L1 isoform 1 precursor [Homo sapiens]
Q6P587	case1-VS-control	-2.667	0.197996	-13.47	8	8.85e-07	1.01e-05	Down	Q6P587	Acylpyruvase FAHD1, mitochondrial OS=Homo sapiens OX=9606 GN=FAHD1 PE=1 SV=2	100	7e-166	NP_112485.1	acylpyruvase FAHD1, mitochondrial isoform 2 [Homo sapiens]
Q6PIU2	case1-VS-control	-1.39117	0.103173	-13.4839	8	8.78e-07	1.01e-05	Down	Q6PIU2	Neutral cholesterol ester hydrolase 1 OS=Homo sapiens OX=9606 GN=NCEH1 PE=1 SV=3	100	0	Q6PIU2.3	RecName: Full=Neutral cholesterol ester hydrolase 1; Short=NCEH; AltName: Full=Arylacetamide deacetylase-like 1
Q96DZ1	case1-VS-control	-1.8462	0.136934	-13.4824	8	8.78e-07	1.01e-05	Down	Q96DZ1	Endoplasmic reticulum lectin 1 OS=Homo sapiens OX=9606 GN=ERLEC1 PE=1 SV=1	100	0	NP_056516.2	endoplasmic reticulum lectin 1 isoform 1 precursor [Homo sapiens]
Q96ER9	case1-VS-control	1.29785	0.0963123	13.4754	8	8.82e-07	1.01e-05	Up	Q96ER9	Coiled-coil domain-containing protein 51 OS=Homo sapiens OX=9606 GN=CCDC51 PE=1 SV=2	100	0	NP_078937.3	coiled-coil domain-containing protein 51 isoform 1 [Homo sapiens]
Q99643	case1-VS-control	-1.67721	0.124521	-13.4692	8	8.85e-07	1.01e-05	Down	Q99643	Succinate dehydrogenase cytochrome b560 subunit, mitochondrial OS=Homo sapiens OX=9606 GN=SDHC PE=1 SV=1	100	1e-120	NP_002992.1	succinate dehydrogenase cytochrome b560 subunit, mitochondrial isoform 1 precursor [Homo sapiens]
Q9GZR7	case1-VS-control	-1.75124	0.129765	-13.4955	8	8.72e-07	1.01e-05	Down	Q9GZR7	ATP-dependent RNA helicase DDX24 OS=Homo sapiens OX=9606 GN=DDX24 PE=1 SV=1	100	0	NP_065147.1	ATP-dependent RNA helicase DDX24 [Homo sapiens]
Q9NUJ1	case1-VS-control	-1.68731	0.125197	-13.4772	8	8.81e-07	1.01e-05	Down	Q9NUJ1	Mycophenolic acid acyl-glucuronide esterase, mitochondrial OS=Homo sapiens OX=9606 GN=ABHD10 PE=1 SV=1	100	0	NP_060864.1	mycophenolic acid acyl-glucuronide esterase, mitochondrial isoform 1 precursor [Homo sapiens]
O60443	case1-VS-control	3.4866	0.170796	20.4138	6	8.98e-07	1.02e-05	Up	O60443	Gasdermin-E OS=Homo sapiens OX=9606 GN=GSDME PE=1 SV=2	100	0	NP_004394.1	non-syndromic hearing impairment protein 5 isoform a [Homo sapiens]
P57105	case1-VS-control	-2.18841	0.162883	-13.4355	8	9.02e-07	1.02e-05	Down	P57105	Synaptojanin-2-binding protein OS=Homo sapiens OX=9606 GN=SYNJ2BP PE=1 SV=2	100	3e-102	NP_060843.2	synaptojanin-2-binding protein [Homo sapiens]
Q9Y2Q9	case1-VS-control	-1.27706	0.0951327	-13.424	8	9.08e-07	1.03e-05	Down	Q9Y2Q9	28S ribosomal protein S28, mitochondrial OS=Homo sapiens OX=9606 GN=MRPS28 PE=1 SV=1	100	3e-135	NP_054737.1	28S ribosomal protein S28, mitochondrial [Homo sapiens]
Q53EP0	case1-VS-control	-2.97428	0.221962	-13.4	8	9.21e-07	1.03e-05	Down	Q53EP0	Fibronectin type III domain-containing protein 3B OS=Homo sapiens OX=9606 GN=FNDC3B PE=1 SV=2	100	0	NP_073600.3	fibronectin type III domain-containing protein 3B [Homo sapiens]
Q9BRD0	case1-VS-control	-1.06961	0.0798243	-13.3995	8	9.21e-07	1.03e-05	Down	Q9BRD0	BUD13 homolog OS=Homo sapiens OX=9606 GN=BUD13 PE=1 SV=1	100	0	NP_116114.1	BUD13 homolog isoform 1 [Homo sapiens]
Q9NRX2	case1-VS-control	-1.50805	0.112561	-13.3977	8	9.22e-07	1.03e-05	Down	Q9NRX2	39S ribosomal protein L17, mitochondrial OS=Homo sapiens OX=9606 GN=MRPL17 PE=1 SV=1	100	5e-127	NP_071344.1	39S ribosomal protein L17, mitochondrial [Homo sapiens]
Q9BS26	case1-VS-control	-2.16612	0.161869	-13.3819	8	9.31e-07	1.04e-05	Down	Q9BS26	Endoplasmic reticulum resident protein 44 OS=Homo sapiens OX=9606 GN=ERP44 PE=1 SV=1	100	0	NP_055866.1	endoplasmic reticulum resident protein 44 precursor [Homo sapiens]
O15438	case1-VS-control	1.73365	0.129717	13.3649	8	9.4e-07	1.05e-05	Up	O15438	Canalicular multispecific organic anion transporter 2 OS=Homo sapiens OX=9606 GN=ABCC3 PE=1 SV=3	100	0	NP_003777.2	canalicular multispecific organic anion transporter 2 isoform 1 [Homo sapiens]
Q96GQ7	case1-VS-control	-0.681502	0.05098	-13.368	8	9.38e-07	1.05e-05	None	Q96GQ7	Probable ATP-dependent RNA helicase DDX27 OS=Homo sapiens OX=9606 GN=DDX27 PE=1 SV=2	100	0	NP_060365.7	probable ATP-dependent RNA helicase DDX27 isoform 2 [Homo sapiens]
Q9NXH9	case1-VS-control	2.97766	0.187271	15.9002	7	9.44e-07	1.05e-05	Up	Q9NXH9	tRNA (guanine(26)-N(2))-dimethyltransferase OS=Homo sapiens OX=9606 GN=TRMT1 PE=1 SV=1	100	0	NP_060192.1	tRNA (guanine(26)-N(2))-dimethyltransferase isoform 1 [Homo sapiens]
Q6IQ22	case1-VS-control	-1.43125	0.107431	-13.3225	8	9.63e-07	1.07e-05	Down	Q6IQ22	Ras-related protein Rab-12 OS=Homo sapiens OX=9606 GN=RAB12 PE=1 SV=3	100	4e-180	NP_001020471.2	ras-related protein Rab-12 [Homo sapiens]
P06737	case1-VS-control	2.51689	0.124852	20.159	6	9.68e-07	1.07e-05	Up	P06737	Glycogen phosphorylase, liver form OS=Homo sapiens OX=9606 GN=PYGL PE=1 SV=4	100	0	NP_002854.3	glycogen phosphorylase, liver form isoform 1 [Homo sapiens]
P16435	case1-VS-control	-1.91464	0.143994	-13.2967	8	9.77e-07	1.07e-05	Down	P16435	NADPH--cytochrome P450 reductase OS=Homo sapiens OX=9606 GN=POR PE=1 SV=2	100	0	P16435.2	RecName: Full=NADPH--cytochrome P450 reductase; Short=CPR; Short=P450R
Q05682	case1-VS-control	-2.29115	0.172337	-13.2946	8	9.79e-07	1.07e-05	Down	Q05682	Caldesmon OS=Homo sapiens OX=9606 GN=CALD1 PE=1 SV=3	100	0	NP_149129.2	caldesmon isoform 1 [Homo sapiens]
Q86Y79	case1-VS-control	-1.36708	0.102795	-13.2991	8	9.76e-07	1.07e-05	Down	Q86Y79	Probable peptidyl-tRNA hydrolase OS=Homo sapiens OX=9606 GN=PTRH1 PE=1 SV=1	100	1e-149	NP_001002913.1	probable peptidyl-tRNA hydrolase isoform 1 [Homo sapiens]
Q9Y3B7	case1-VS-control	-1.37846	0.10367	-13.2966	8	9.77e-07	1.07e-05	Down	Q9Y3B7	39S ribosomal protein L11, mitochondrial OS=Homo sapiens OX=9606 GN=MRPL11 PE=1 SV=1	100	2e-133	NP_057134.1	39S ribosomal protein L11, mitochondrial isoform a [Homo sapiens]
Q13033	case1-VS-control	-1.09795	0.082688	-13.2782	8	9.88e-07	1.08e-05	Down	Q13033	Striatin-3 OS=Homo sapiens OX=9606 GN=STRN3 PE=1 SV=3	100	0	NP_001077362.1	striatin-3 isoform 1 [Homo sapiens]
Q9UIJ7	case1-VS-control	-2.41631	0.182395	-13.2477	8	1.01e-06	1.09e-05	Down	Q9UIJ7	GTP:AMP phosphotransferase AK3, mitochondrial OS=Homo sapiens OX=9606 GN=AK3 PE=1 SV=4	100	1e-167	NP_057366.2	GTP:AMP phosphotransferase AK3, mitochondrial isoform a [Homo sapiens]
Q15397	case1-VS-control	-1.19343	0.0902002	-13.2309	8	1.02e-06	1.1e-05	Down	Q15397	Pumilio homolog 3 OS=Homo sapiens OX=9606 GN=PUM3 PE=1 SV=3	100	0	NP_055693.4	pumilio homolog 3 [Homo sapiens]
Q1KMD3	case1-VS-control	-2.04368	0.154729	-13.2081	8	1.03e-06	1.11e-05	Down	Q1KMD3	Heterogeneous nuclear ribonucleoprotein U-like protein 2 OS=Homo sapiens OX=9606 GN=HNRNPUL2 PE=1 SV=1	100	0	NP_001073027.1	heterogeneous nuclear ribonucleoprotein U-like protein 2 [Homo sapiens]
Q8NB49	case1-VS-control	-2.05581	0.131246	-15.6638	7	1.05e-06	1.13e-05	Down	Q8NB49	Phospholipid-transporting ATPase IG OS=Homo sapiens OX=9606 GN=ATP11C PE=1 SV=3	100	0	Q8NB49.3	RecName: Full=Phospholipid-transporting ATPase IG; AltName: Full=ATPase IQ; AltName: Full=ATPase class VI type 11C; AltName: Full=P4-ATPase flippase complex alpha subunit ATP11C
Q96PU8	case1-VS-control	-2.17764	0.109476	-19.8915	6	1.05e-06	1.13e-05	Down	Q96PU8	Protein quaking OS=Homo sapiens OX=9606 GN=QKI PE=1 SV=1	100	0	AAF63414.1	QUAKING isoform 6 [Homo sapiens]
O00161	case1-VS-control	-1.22734	0.0931835	-13.1712	8	1.05e-06	1.13e-05	Down	O00161	Synaptosomal-associated protein 23 OS=Homo sapiens OX=9606 GN=SNAP23 PE=1 SV=1	100	2e-153	NP_003816.2	synaptosomal-associated protein 23 isoform SNAP23A [Homo sapiens]
Q9P0L0	case1-VS-control	-0.93946	0.0714313	-13.1519	8	1.06e-06	1.14e-05	None	Q9P0L0	Vesicle-associated membrane protein-associated protein A OS=Homo sapiens OX=9606 GN=VAPA PE=1 SV=3	100	0	NP_919415.2	vesicle-associated membrane protein-associated protein A isoform 2 [Homo sapiens]
Q14197	case1-VS-control	-1.24634	0.0948631	-13.1383	8	1.07e-06	1.14e-05	Down	Q14197	Peptidyl-tRNA hydrolase ICT1, mitochondrial OS=Homo sapiens OX=9606 GN=MRPL58 PE=1 SV=1	100	7e-153	NP_001536.1	peptidyl-tRNA hydrolase ICT1, mitochondrial isoform 1 precursor [Homo sapiens]
Q9BYN8	case1-VS-control	-1.48959	0.113347	-13.1418	8	1.07e-06	1.14e-05	Down	Q9BYN8	28S ribosomal protein S26, mitochondrial OS=Homo sapiens OX=9606 GN=MRPS26 PE=1 SV=1	100	3e-144	NP_110438.1	28S ribosomal protein S26, mitochondrial [Homo sapiens]
Q14344	case1-VS-control	-1.59029	0.121189	-13.1225	8	1.08e-06	1.15e-05	Down	Q14344	Guanine nucleotide-binding protein subunit alpha-13 OS=Homo sapiens OX=9606 GN=GNA13 PE=1 SV=2	100	0	NP_006563.2	guanine nucleotide-binding protein subunit alpha-13 isoform 1 [Homo sapiens]
Q8N2K0	case1-VS-control	-2.03814	0.155296	-13.1243	8	1.08e-06	1.15e-05	Down	Q8N2K0	Monoacylglycerol lipase ABHD12 OS=Homo sapiens OX=9606 GN=ABHD12 PE=1 SV=2	100	0	NP_001035937.1	monoacylglycerol lipase ABHD12 isoform a [Homo sapiens]
Q9UKS6	case1-VS-control	2.48536	0.189433	13.12	8	1.08e-06	1.15e-05	Up	Q9UKS6	Protein kinase C and casein kinase substrate in neurons protein 3 OS=Homo sapiens OX=9606 GN=PACSIN3 PE=1 SV=2	100	0	NP_057307.2	protein kinase C and casein kinase substrate in neurons protein 3 [Homo sapiens]
P37198	case1-VS-control	-1.21774	0.0930026	-13.0936	8	1.1e-06	1.16e-05	Down	P37198	Nuclear pore glycoprotein p62 OS=Homo sapiens OX=9606 GN=NUP62 PE=1 SV=3	100	0	NP_036478.2	nuclear pore glycoprotein p62 [Homo sapiens]
Q15437	case1-VS-control	1.75658	0.134268	13.0826	8	1.11e-06	1.17e-05	Up	Q15437	Protein transport protein Sec23B OS=Homo sapiens OX=9606 GN=SEC23B PE=1 SV=2	100	0	NP_116780.1	protein transport protein Sec23B isoform 1 [Homo sapiens]
O94887	case1-VS-control	-1.51865	0.11619	-13.0703	8	1.12e-06	1.17e-05	Down	O94887	FERM, ARHGEF and pleckstrin domain-containing protein 2 OS=Homo sapiens OX=9606 GN=FARP2 PE=1 SV=3	100	0	NP_055623.1	FERM, RhoGEF and pleckstrin domain-containing protein 2 isoform a [Homo sapiens]
Q6UVK1	case1-VS-control	-1.35675	0.0689731	-19.6707	6	1.12e-06	1.18e-05	Down	Q6UVK1	Chondroitin sulfate proteoglycan 4 OS=Homo sapiens OX=9606 GN=CSPG4 PE=1 SV=2	100	0	NP_001888.2	chondroitin sulfate proteoglycan 4 precursor [Homo sapiens]
A0PJW6	case1-VS-control	1.51584	0.11619	13.0462	8	1.13e-06	1.18e-05	Up	A0PJW6	Transmembrane protein 223 OS=Homo sapiens OX=9606 GN=TMEM223 PE=1 SV=1	100	7e-144	AAH20914.1	TMEM223 protein, partial [Homo sapiens]
Q9NP79	case1-VS-control	0.940571	0.0720907	13.047	8	1.13e-06	1.18e-05	None	Q9NP79	Vacuolar protein sorting-associated protein VTA1 homolog OS=Homo sapiens OX=9606 GN=VTA1 PE=1 SV=1	100	0	NP_057569.2	vacuolar protein sorting-associated protein VTA1 homolog isoform a [Homo sapiens]
P43304	case1-VS-control	-1.64994	0.126836	-13.0084	8	1.16e-06	1.21e-05	Down	P43304	Glycerol-3-phosphate dehydrogenase, mitochondrial OS=Homo sapiens OX=9606 GN=GPD2 PE=1 SV=3	100	0	NP_001076581.2	glycerol-3-phosphate dehydrogenase, mitochondrial precursor [Homo sapiens]
Q07065	case1-VS-control	-1.64365	0.126458	-12.9976	8	1.16e-06	1.21e-05	Down	Q07065	Cytoskeleton-associated protein 4 OS=Homo sapiens OX=9606 GN=CKAP4 PE=1 SV=2	100	0	NP_006816.2	cytoskeleton-associated protein 4 [Homo sapiens]
O00273	case1-VS-control	3.1759	0.162787	19.5095	6	1.17e-06	1.22e-05	Up	O00273	DNA fragmentation factor subunit alpha OS=Homo sapiens OX=9606 GN=DFFA PE=1 SV=1	100	0	NP_004392.1	DNA fragmentation factor subunit alpha isoform 1 [Homo sapiens]
Q53H12	case1-VS-control	-1.17376	0.0904741	-12.9735	8	1.18e-06	1.22e-05	Down	Q53H12	Acylglycerol kinase, mitochondrial OS=Homo sapiens OX=9606 GN=AGK PE=1 SV=2	100	0	NP_060708.1	acylglycerol kinase, mitochondrial precursor [Homo sapiens]
Q14974	case1-VS-control	0.856058	0.0660939	12.9522	8	1.2e-06	1.24e-05	None	Q14974	Importin subunit beta-1 OS=Homo sapiens OX=9606 GN=KPNB1 PE=1 SV=2	100	0	NP_002256.2	importin subunit beta-1 isoform 1 [Homo sapiens]
Q92620	case1-VS-control	1.04816	0.080966	12.9457	8	1.2e-06	1.24e-05	Up	Q92620	Pre-mRNA-splicing factor ATP-dependent RNA helicase PRP16 OS=Homo sapiens OX=9606 GN=DHX38 PE=1 SV=2	99.919	0	XP_004058003.1	PREDICTED: pre-mRNA-splicing factor ATP-dependent RNA helicase PRP16 [Gorilla gorilla gorilla]
Q9Y5J7	case1-VS-control	-1.48682	0.114896	-12.9406	8	1.2e-06	1.24e-05	Down	Q9Y5J7	Mitochondrial import inner membrane translocase subunit Tim9 OS=Homo sapiens OX=9606 GN=TIMM9 PE=1 SV=1	100	8e-61	NP_036592.1	mitochondrial import inner membrane translocase subunit Tim9 isoform a [Homo sapiens]
Q5ZPR3	case1-VS-control	-2.1643	0.112222	-19.2859	6	1.26e-06	1.29e-05	Down	Q5ZPR3	CD276 antigen OS=Homo sapiens OX=9606 GN=CD276 PE=1 SV=1	100	0	NP_001019907.1	CD276 antigen isoform a precursor [Homo sapiens]
O76021	case1-VS-control	-1.15465	0.0899494	-12.8367	8	1.28e-06	1.31e-05	Down	O76021	Ribosomal L1 domain-containing protein 1 OS=Homo sapiens OX=9606 GN=RSL1D1 PE=1 SV=3	100	0	AAH19069.2	RSL1D1 protein, partial [Homo sapiens]
P10619	case1-VS-control	-1.75653	0.136811	-12.8391	8	1.28e-06	1.31e-05	Down	P10619	Lysosomal protective protein OS=Homo sapiens OX=9606 GN=CTSA PE=1 SV=2	100	0	NP_001121167.1	lysosomal protective protein isoform b preproprotein [Homo sapiens]
Q9NW82	case1-VS-control	2.00708	0.156311	12.8403	8	1.28e-06	1.31e-05	Up	Q9NW82	WD repeat-containing protein 70 OS=Homo sapiens OX=9606 GN=WDR70 PE=1 SV=1	100	0	NP_060504.1	WD repeat-containing protein 70 isoform 1 [Homo sapiens]
P00387	case1-VS-control	-1.68894	0.131736	-12.8206	8	1.29e-06	1.31e-05	Down	P00387	NADH-cytochrome b5 reductase 3 OS=Homo sapiens OX=9606 GN=CYB5R3 PE=1 SV=3	100	0	NP_000389.1	NADH-cytochrome b5 reductase 3 isoform 1 [Homo sapiens]
P62879	case1-VS-control	-1.88407	0.146975	-12.819	8	1.29e-06	1.31e-05	Down	P62879	Guanine nucleotide-binding protein G(I)/G(S)/G(T) subunit beta-2 OS=Homo sapiens OX=9606 GN=GNB2 PE=1 SV=3	100	0	NP_034442.1	guanine nucleotide-binding protein G(I)/G(S)/G(T) subunit beta-2 [Mus musculus]
P42356	case1-VS-control	-2.7514	0.181293	-15.1765	7	1.3e-06	1.31e-05	Down	P42356	Phosphatidylinositol 4-kinase alpha OS=Homo sapiens OX=9606 GN=PI4KA PE=1 SV=4	100	0	NP_477352.3	phosphatidylinositol 4-kinase alpha [Homo sapiens]
Q9NVA2	case1-VS-control	-1.12666	0.0879602	-12.8087	8	1.3e-06	1.32e-05	Down	Q9NVA2	Septin-11 OS=Homo sapiens OX=9606 GN=SEPT11 PE=1 SV=3	100	0	NP_060713.1	septin-11 isoform 2 [Homo sapiens]
Q92979	case1-VS-control	-0.705253	0.0551003	-12.7994	8	1.31e-06	1.32e-05	None	Q92979	Ribosomal RNA small subunit methyltransferase NEP1 OS=Homo sapiens OX=9606 GN=EMG1 PE=1 SV=4	100	0	NP_006322.4	ribosomal RNA small subunit methyltransferase NEP1 isoform 1 [Homo sapiens]
O95721	case1-VS-control	-0.972415	0.0759954	-12.7957	8	1.31e-06	1.32e-05	None	O95721	Synaptosomal-associated protein 29 OS=Homo sapiens OX=9606 GN=SNAP29 PE=1 SV=1	100	0	NP_004773.1	synaptosomal-associated protein 29 [Homo sapiens]
O96008	case1-VS-control	-1.30907	0.102418	-12.7816	8	1.32e-06	1.33e-05	Down	O96008	Mitochondrial import receptor subunit TOM40 homolog OS=Homo sapiens OX=9606 GN=TOMM40 PE=1 SV=1	100	0	NP_006105.1	mitochondrial import receptor subunit TOM40 homolog [Homo sapiens]
Q9HAP6	case1-VS-control	-1.63305	0.1278	-12.7782	8	1.33e-06	1.33e-05	Down	Q9HAP6	Protein lin-7 homolog B OS=Homo sapiens OX=9606 GN=LIN7B PE=1 SV=1	100	2e-148	NP_071448.1	protein lin-7 homolog B isoform 1 [Homo sapiens]
P82650	case1-VS-control	-1.47684	0.115804	-12.753	8	1.35e-06	1.35e-05	Down	P82650	28S ribosomal protein S22, mitochondrial OS=Homo sapiens OX=9606 GN=MRPS22 PE=1 SV=1	100	0	NP_064576.1	28S ribosomal protein S22, mitochondrial [Homo sapiens]
Q9P0I2	case1-VS-control	-1.51099	0.118544	-12.7463	8	1.35e-06	1.35e-05	Down	Q9P0I2	ER membrane protein complex subunit 3 OS=Homo sapiens OX=9606 GN=EMC3 PE=1 SV=3	100	0	XP_019506662.1	PREDICTED: ER membrane protein complex subunit 3 [Hipposideros armiger]
Q96DV4	case1-VS-control	-1.40089	0.109994	-12.736	8	1.36e-06	1.35e-05	Down	Q96DV4	39S ribosomal protein L38, mitochondrial OS=Homo sapiens OX=9606 GN=MRPL38 PE=1 SV=2	100	0	NP_115867.2	39S ribosomal protein L38, mitochondrial [Homo sapiens]
Q14669	case1-VS-control	-1.32634	0.104218	-12.7266	8	1.37e-06	1.36e-05	Down	Q14669	E3 ubiquitin-protein ligase TRIP12 OS=Homo sapiens OX=9606 GN=TRIP12 PE=1 SV=1	100	0	NP_004229.1	E3 ubiquitin-protein ligase TRIP12 isoform c [Homo sapiens]
Q7L9B9	case1-VS-control	-2.1034	0.110847	-18.9757	6	1.38e-06	1.37e-05	Down	Q7L9B9	Endonuclease/exonuclease/phosphatase family domain-containing protein 1 OS=Homo sapiens OX=9606 GN=EEPD1 PE=1 SV=2	100	0	NP_085139.2	endonuclease/exonuclease/phosphatase family domain-containing protein 1 [Homo sapiens]
Q13155	case1-VS-control	1.63231	0.128663	12.6867	8	1.4e-06	1.38e-05	Up	Q13155	Aminoacyl tRNA synthase complex-interacting multifunctional protein 2 OS=Homo sapiens OX=9606 GN=AIMP2 PE=1 SV=2	100	0	NP_006294.2	aminoacyl tRNA synthase complex-interacting multifunctional protein 2 isoform a [Homo sapiens]
Q8TED0	case1-VS-control	-1.36411	0.107497	-12.6898	8	1.4e-06	1.38e-05	Down	Q8TED0	U3 small nucleolar RNA-associated protein 15 homolog OS=Homo sapiens OX=9606 GN=UTP15 PE=1 SV=3	100	0	NP_115551.2	U3 small nucleolar RNA-associated protein 15 homolog isoform 1 [Homo sapiens]
Q8WUM4	case1-VS-control	2.39813	0.189226	12.6733	8	1.41e-06	1.39e-05	Up	Q8WUM4	Programmed cell death 6-interacting protein OS=Homo sapiens OX=9606 GN=PDCD6IP PE=1 SV=1	100	0	NP_037506.2	programmed cell death 6-interacting protein isoform 1 [Homo sapiens]
O75323	case1-VS-control	-1.27138	0.100449	-12.657	8	1.43e-06	1.4e-05	Down	O75323	Protein NipSnap homolog 2 OS=Homo sapiens OX=9606 GN=NIPSNAP2 PE=1 SV=1	100	0	NP_001474.1	protein NipSnap homolog 2 isoform 1 [Homo sapiens]
Q7Z3B4	case1-VS-control	-1.87074	0.147991	-12.6409	8	1.44e-06	1.41e-05	Down	Q7Z3B4	Nucleoporin p54 OS=Homo sapiens OX=9606 GN=NUP54 PE=1 SV=2	100	0	NP_059122.2	nucleoporin p54 isoform 1 [Homo sapiens]
Q8N2F6	case1-VS-control	-0.992649	0.0785665	-12.6345	8	1.45e-06	1.42e-05	None	Q8N2F6	Armadillo repeat-containing protein 10 OS=Homo sapiens OX=9606 GN=ARMC10 PE=1 SV=1	100	0	NP_114111.2	armadillo repeat-containing protein 10 isoform a [Homo sapiens]
P04626	case1-VS-control	-3.39837	0.227735	-14.9225	7	1.46e-06	1.42e-05	Down	P04626	Receptor tyrosine-protein kinase erbB-2 OS=Homo sapiens OX=9606 GN=ERBB2 PE=1 SV=1	100	0	NP_004439.2	receptor tyrosine-protein kinase erbB-2 isoform a precursor [Homo sapiens]
Q08209	case1-VS-control	2.51913	0.199662	12.617	8	1.46e-06	1.42e-05	Up	Q08209	Serine/threonine-protein phosphatase 2B catalytic subunit alpha isoform OS=Homo sapiens OX=9606 GN=PPP3CA PE=1 SV=1	100	0	NP_000935.1	serine/threonine-protein phosphatase 2B catalytic subunit alpha isoform isoform 1 [Homo sapiens]
Q92769	case1-VS-control	-1.7424	0.138174	-12.6102	8	1.47e-06	1.43e-05	Down	Q92769	Histone deacetylase 2 OS=Homo sapiens OX=9606 GN=HDAC2 PE=1 SV=2	99.795	0	XP_008005472.1	PREDICTED: LOW QUALITY PROTEIN: histone deacetylase 2 [Chlorocebus sabaeus]
Q7Z5K2	case1-VS-control	-2.31786	0.184245	-12.5803	8	1.49e-06	1.45e-05	Down	Q7Z5K2	Wings apart-like protein homolog OS=Homo sapiens OX=9606 GN=WAPL PE=1 SV=1	100	0	NP_055860.1	wings apart-like protein homolog isoform 1 [Homo sapiens]
Q9UH99	case1-VS-control	-2.92445	0.196727	-14.8656	7	1.49e-06	1.45e-05	Down	Q9UH99	SUN domain-containing protein 2 OS=Homo sapiens OX=9606 GN=SUN2 PE=1 SV=3	100	0	NP_056189.1	SUN domain-containing protein 2 isoform b [Homo sapiens]
P23368	case1-VS-control	-1.84107	0.14641	-12.5747	8	1.5e-06	1.45e-05	Down	P23368	NAD-dependent malic enzyme, mitochondrial OS=Homo sapiens OX=9606 GN=ME2 PE=1 SV=1	100	0	NP_002387.1	NAD-dependent malic enzyme, mitochondrial isoform 1 precursor [Homo sapiens]
Q6EMK4	case1-VS-control	-2.58826	0.138328	-18.711	6	1.5e-06	1.45e-05	Down	Q6EMK4	Vasorin OS=Homo sapiens OX=9606 GN=VASN PE=1 SV=1	100	0	NP_612449.2	vasorin precursor [Homo sapiens]
P82932	case1-VS-control	-1.46613	0.116779	-12.5548	8	1.52e-06	1.45e-05	Down	P82932	28S ribosomal protein S6, mitochondrial OS=Homo sapiens OX=9606 GN=MRPS6 PE=1 SV=3	100	9e-88	NP_115865.1	28S ribosomal protein S6, mitochondrial [Homo sapiens]
Q13724	case1-VS-control	-2.73347	0.217618	-12.5609	8	1.51e-06	1.45e-05	Down	Q13724	Mannosyl-oligosaccharide glucosidase OS=Homo sapiens OX=9606 GN=MOGS PE=1 SV=5	100	0	NP_006293.2	mannosyl-oligosaccharide glucosidase isoform 1 [Homo sapiens]
Q5VZK9	case1-VS-control	2.10361	0.167548	12.5553	8	1.52e-06	1.45e-05	Up	Q5VZK9	F-actin-uncapping protein LRRC16A OS=Homo sapiens OX=9606 GN=CARMIL1 PE=1 SV=1	100	0	NP_060110.4	F-actin-uncapping protein LRRC16A isoform 1 [Homo sapiens]
Q8ND76	case1-VS-control	-1.58829	0.126534	-12.5523	8	1.52e-06	1.45e-05	Down	Q8ND76	Cyclin-Y OS=Homo sapiens OX=9606 GN=CCNY PE=1 SV=2	100	0	NP_659449.3	cyclin-Y isoform 1 [Homo sapiens]
Q96C36	case1-VS-control	-0.985772	0.0784843	-12.5601	8	1.51e-06	1.45e-05	None	Q96C36	Pyrroline-5-carboxylate reductase 2 OS=Homo sapiens OX=9606 GN=PYCR2 PE=1 SV=1	100	0	NP_037460.2	pyrroline-5-carboxylate reductase 2 isoform 1 [Homo sapiens]
Q96CW1	case1-VS-control	-1.19001	0.0949445	-12.5338	8	1.54e-06	1.46e-05	Down	Q96CW1	AP-2 complex subunit mu OS=Homo sapiens OX=9606 GN=AP2M1 PE=1 SV=2	100	0	NP_033809.1	AP-2 complex subunit mu isoform 1 [Mus musculus]
Q96IU4	case1-VS-control	4.35336	0.293968	14.809	7	1.53e-06	1.46e-05	Up	Q96IU4	Protein ABHD14B OS=Homo sapiens OX=9606 GN=ABHD14B PE=1 SV=1	100	7e-152	NP_116139.1	protein ABHD14B isoform 1 [Homo sapiens]
Q9HD33	case1-VS-control	-1.80757	0.144226	-12.5329	8	1.54e-06	1.46e-05	Down	Q9HD33	39S ribosomal protein L47, mitochondrial OS=Homo sapiens OX=9606 GN=MRPL47 PE=1 SV=2	100	0	NP_065142.2	39S ribosomal protein L47, mitochondrial isoform a [Homo sapiens]
Q9HBH0	case1-VS-control	3.19178	0.215761	14.7932	7	1.54e-06	1.46e-05	Up	Q9HBH0	Rho-related GTP-binding protein RhoF OS=Homo sapiens OX=9606 GN=RHOF PE=1 SV=1	100	8e-157	NP_061907.2	rho-related GTP-binding protein RhoF precursor [Homo sapiens]
Q9UBB4	case1-VS-control	2.9045	0.232072	12.5155	8	1.55e-06	1.47e-05	Up	Q9UBB4	Ataxin-10 OS=Homo sapiens OX=9606 GN=ATXN10 PE=1 SV=1	100	0	NP_037368.1	ataxin-10 isoform 1 [Homo sapiens]
A8MXV4	case1-VS-control	-3.77662	0.203741	-18.5363	6	1.59e-06	1.49e-05	Down	A8MXV4	Nucleoside diphosphate-linked moiety X motif 19 OS=Homo sapiens OX=9606 GN=NUDT19 PE=1 SV=1	100	0	NP_001099040.1	nucleoside diphosphate-linked moiety X motif 19 precursor [Homo sapiens]
Q13586	case1-VS-control	-1.63378	0.13094	-12.4773	8	1.59e-06	1.49e-05	Down	Q13586	Stromal interaction molecule 1 OS=Homo sapiens OX=9606 GN=STIM1 PE=1 SV=3	100	0	NP_003147.2	stromal interaction molecule 1 isoform 2 precursor [Homo sapiens]
Q9UBS4	case1-VS-control	-2.56473	0.205553	-12.4773	8	1.59e-06	1.49e-05	Down	Q9UBS4	DnaJ homolog subfamily B member 11 OS=Homo sapiens OX=9606 GN=DNAJB11 PE=1 SV=1	100	0	NP_057390.1	dnaJ homolog subfamily B member 11 precursor [Homo sapiens]
Q9Y3D6	case1-VS-control	-1.43264	0.114832	-12.476	8	1.59e-06	1.49e-05	Down	Q9Y3D6	Mitochondrial fission 1 protein OS=Homo sapiens OX=9606 GN=FIS1 PE=1 SV=2	100	2e-104	NP_057152.2	mitochondrial fission 1 protein [Homo sapiens]
O60287	case1-VS-control	-1.42301	0.114185	-12.4623	8	1.61e-06	1.49e-05	Down	O60287	Nucleolar pre-ribosomal-associated protein 1 OS=Homo sapiens OX=9606 GN=URB1 PE=1 SV=4	100	0	NP_055640.2	nucleolar pre-ribosomal-associated protein 1 [Homo sapiens]
P07814	case1-VS-control	2.19965	0.176492	12.4632	8	1.61e-06	1.49e-05	Up	P07814	Bifunctional glutamate/proline--tRNA ligase OS=Homo sapiens OX=9606 GN=EPRS PE=1 SV=5	100	0	NP_004437.2	bifunctional glutamate/proline--tRNA ligase [Homo sapiens]
Q96BR5	case1-VS-control	-1.59649	0.128052	-12.4676	8	1.6e-06	1.49e-05	Down	Q96BR5	Cytochrome c oxidase assembly factor 7 OS=Homo sapiens OX=9606 GN=COA7 PE=1 SV=2	100	3e-172	NP_075565.2	cytochrome c oxidase assembly factor 7 [Homo sapiens]
Q13405	case1-VS-control	-1.27666	0.102702	-12.4307	8	1.64e-06	1.52e-05	Down	Q13405	39S ribosomal protein L49, mitochondrial OS=Homo sapiens OX=9606 GN=MRPL49 PE=1 SV=1	100	2e-120	NP_004918.1	39S ribosomal protein L49, mitochondrial [Homo sapiens]
Q07864	case1-VS-control	1.88336	0.0730939	25.7663	5	1.64e-06	1.52e-05	Up	Q07864	DNA polymerase epsilon catalytic subunit A OS=Homo sapiens OX=9606 GN=POLE PE=1 SV=5	100	0	NP_006222.2	DNA polymerase epsilon catalytic subunit A [Homo sapiens]
Q5F1R6	case1-VS-control	3.13926	0.17057	18.4046	6	1.66e-06	1.53e-05	Up	Q5F1R6	DnaJ homolog subfamily C member 21 OS=Homo sapiens OX=9606 GN=DNAJC21 PE=1 SV=2	100	0	NP_001012339.2	dnaJ homolog subfamily C member 21 isoform 2 [Homo sapiens]
Q8N983	case1-VS-control	-1.41705	0.114212	-12.4071	8	1.66e-06	1.53e-05	Down	Q8N983	39S ribosomal protein L43, mitochondrial OS=Homo sapiens OX=9606 GN=MRPL43 PE=1 SV=1	100	1e-155	NP_789762.1	39S ribosomal protein L43, mitochondrial isoform b [Homo sapiens]
Q96HE7	case1-VS-control	-1.86155	0.150126	-12.3999	8	1.67e-06	1.54e-05	Down	Q96HE7	ERO1-like protein alpha OS=Homo sapiens OX=9606 GN=ERO1A PE=1 SV=2	100	0	NP_055399.1	ERO1-like protein alpha precursor [Homo sapiens]
Q96RQ3	case1-VS-control	-2.11597	0.170666	-12.3983	8	1.67e-06	1.54e-05	Down	Q96RQ3	Methylcrotonoyl-CoA carboxylase subunit alpha, mitochondrial OS=Homo sapiens OX=9606 GN=MCCC1 PE=1 SV=3	100	0	NP_064551.3	methylcrotonoyl-CoA carboxylase subunit alpha, mitochondrial isoform 1 precursor [Homo sapiens]
Q9ULC3	case1-VS-control	-1.93261	0.155937	-12.3935	8	1.68e-06	1.54e-05	Down	Q9ULC3	Ras-related protein Rab-23 OS=Homo sapiens OX=9606 GN=RAB23 PE=1 SV=1	100	9e-177	NP_057361.3	ras-related protein Rab-23 [Homo sapiens]
Q8NFC6	case1-VS-control	-1.86489	0.150845	-12.3629	8	1.71e-06	1.56e-05	Down	Q8NFC6	Biorientation of chromosomes in cell division protein 1-like 1 OS=Homo sapiens OX=9606 GN=BOD1L1 PE=1 SV=2	100	0	NP_683692.2	biorientation of chromosomes in cell division protein 1-like 1 [Homo sapiens]
Q8WVX9	case1-VS-control	-1.93288	0.156354	-12.3622	8	1.71e-06	1.56e-05	Down	Q8WVX9	Fatty acyl-CoA reductase 1 OS=Homo sapiens OX=9606 GN=FAR1 PE=1 SV=1	99.223	0	XP_012636182.1	fatty acyl-CoA reductase 1 isoform X3 [Microcebus murinus]
P62318	case1-VS-control	-0.791284	0.0640406	-12.356	8	1.72e-06	1.56e-05	None	P62318	Small nuclear ribonucleoprotein Sm D3 OS=Homo sapiens OX=9606 GN=SNRPD3 PE=1 SV=1	100	2e-88	XP_011953486.2	PREDICTED: small nuclear ribonucleoprotein Sm D3 isoform X1 [Ovis aries]
Q93008	case1-VS-control	2.84326	0.230343	12.3436	8	1.73e-06	1.57e-05	Up	Q93008	Probable ubiquitin carboxyl-terminal hydrolase FAF-X OS=Homo sapiens OX=9606 GN=USP9X PE=1 SV=3	100	0	NP_001034679.2	probable ubiquitin carboxyl-terminal hydrolase FAF-X isoform 3 [Homo sapiens]
P23469	case1-VS-control	-1.60408	0.130071	-12.3323	8	1.74e-06	1.58e-05	Down	P23469	Receptor-type tyrosine-protein phosphatase epsilon OS=Homo sapiens OX=9606 GN=PTPRE PE=1 SV=1	100	0	NP_006495.1	receptor-type tyrosine-protein phosphatase epsilon isoform 1 precursor [Homo sapiens]
Q9NV88	case1-VS-control	-1.17489	0.0952469	-12.3352	8	1.74e-06	1.58e-05	Down	Q9NV88	Integrator complex subunit 9 OS=Homo sapiens OX=9606 GN=INTS9 PE=1 SV=2	100	0	NP_060720.2	integrator complex subunit 9 isoform 1 [Homo sapiens]
O75616	case1-VS-control	-1.55911	0.126542	-12.3209	8	1.75e-06	1.59e-05	Down	O75616	GTPase Era, mitochondrial OS=Homo sapiens OX=9606 GN=ERAL1 PE=1 SV=2	100	0	NP_005693.1	GTPase Era, mitochondrial isoform 1 [Homo sapiens]
P61916	case1-VS-control	-2.37405	0.192749	-12.3168	8	1.76e-06	1.59e-05	Down	P61916	NPC intracellular cholesterol transporter 2 OS=Homo sapiens OX=9606 GN=NPC2 PE=1 SV=1	100	3e-107	NP_006423.1	epididymal secretory protein E1 precursor [Homo sapiens]
Q32P28	case1-VS-control	-1.62936	0.132355	-12.3105	8	1.76e-06	1.59e-05	Down	Q32P28	Prolyl 3-hydroxylase 1 OS=Homo sapiens OX=9606 GN=P3H1 PE=1 SV=2	100	0	NP_071751.3	prolyl 3-hydroxylase 1 isoform 1 precursor [Homo sapiens]
O95881	case1-VS-control	-1.91501	0.155774	-12.2935	8	1.78e-06	1.6e-05	Down	O95881	Thioredoxin domain-containing protein 12 OS=Homo sapiens OX=9606 GN=TXNDC12 PE=1 SV=1	100	2e-125	NP_056997.1	thioredoxin domain-containing protein 12 precursor [Homo sapiens]
Q93074	case1-VS-control	-2.14837	0.118188	-18.1776	6	1.78e-06	1.6e-05	Down	Q93074	Mediator of RNA polymerase II transcription subunit 12 OS=Homo sapiens OX=9606 GN=MED12 PE=1 SV=4	100	0	NP_005111.2	mediator of RNA polymerase II transcription subunit 12 [Homo sapiens]
P51858	case1-VS-control	2.23786	0.182325	12.274	8	1.8e-06	1.62e-05	Up	P51858	Hepatoma-derived growth factor OS=Homo sapiens OX=9606 GN=HDGF PE=1 SV=1	100	2e-170	NP_004485.1	hepatoma-derived growth factor isoform a [Homo sapiens]
P49750	case1-VS-control	-1.60209	0.130675	-12.2601	8	1.82e-06	1.62e-05	Down	P49750	YLP motif-containing protein 1 OS=Homo sapiens OX=9606 GN=YLPM1 PE=1 SV=4	100	0	NP_062535.2	YLP motif-containing protein 1 [Homo sapiens]
Q13151	case1-VS-control	-0.863869	0.0704506	-12.2621	8	1.82e-06	1.62e-05	None	Q13151	Heterogeneous nuclear ribonucleoprotein A0 OS=Homo sapiens OX=9606 GN=HNRNPA0 PE=1 SV=1	100	0	NP_006796.1	heterogeneous nuclear ribonucleoprotein A0 [Homo sapiens]
Q53F19	case1-VS-control	-1.19506	0.0975114	-12.2556	8	1.83e-06	1.63e-05	Down	Q53F19	Nuclear cap-binding protein subunit 3 OS=Homo sapiens OX=9606 GN=NCBP3 PE=1 SV=2	100	0	NP_001107590.1	nuclear cap-binding protein subunit 3 [Homo sapiens]
P20336	case1-VS-control	-1.82954	0.149347	-12.2503	8	1.83e-06	1.63e-05	Down	P20336	Ras-related protein Rab-3A OS=Homo sapiens OX=9606 GN=RAB3A PE=1 SV=1	100	2e-165	NP_002857.1	ras-related protein Rab-3A [Homo sapiens]
O15143	case1-VS-control	1.25906	0.102909	12.2348	8	1.85e-06	1.64e-05	Up	O15143	Actin-related protein 2/3 complex subunit 1B OS=Homo sapiens OX=9606 GN=ARPC1B PE=1 SV=3	100	0	NP_005711.1	actin-related protein 2/3 complex subunit 1B [Homo sapiens]
P09234	case1-VS-control	-1.82905	0.149628	-12.224	8	1.86e-06	1.65e-05	Down	P09234	U1 small nuclear ribonucleoprotein C OS=Homo sapiens OX=9606 GN=SNRPC PE=1 SV=1	100	1e-106	XP_011727472.1	PREDICTED: U1 small nuclear ribonucleoprotein C [Macaca nemestrina]
P61026	case1-VS-control	-1.77872	0.145506	-12.2244	8	1.86e-06	1.65e-05	Down	P61026	Ras-related protein Rab-10 OS=Homo sapiens OX=9606 GN=RAB10 PE=1 SV=1	100	1e-146	NP_057885.1	ras-related protein Rab-10 [Mus musculus]
Q5JPH6	case1-VS-control	-1.76506	0.144642	-12.203	8	1.89e-06	1.66e-05	Down	Q5JPH6	Probable glutamate--tRNA ligase, mitochondrial OS=Homo sapiens OX=9606 GN=EARS2 PE=1 SV=2	100	0	NP_001077083.1	probable glutamate--tRNA ligase, mitochondrial isoform 1 [Homo sapiens]
A0FGR8	case1-VS-control	-0.87821	0.0720116	-12.1954	8	1.9e-06	1.67e-05	None	A0FGR8	Extended synaptotagmin-2 OS=Homo sapiens OX=9606 GN=ESYT2 PE=1 SV=1	100	0	A0FGR8.1	RecName: Full=Extended synaptotagmin-2; Short=E-Syt2; AltName: Full=Chr2Syt
Q5JTH9	case1-VS-control	-1.40163	0.1151	-12.1776	8	1.92e-06	1.68e-05	Down	Q5JTH9	RRP12-like protein OS=Homo sapiens OX=9606 GN=RRP12 PE=1 SV=2	100	0	NP_055994.2	RRP12-like protein isoform 1 [Homo sapiens]
Q9H2V7	case1-VS-control	-1.11619	0.0916645	-12.1769	8	1.92e-06	1.68e-05	Down	Q9H2V7	Protein spinster homolog 1 OS=Homo sapiens OX=9606 GN=SPNS1 PE=1 SV=1	100	0	NP_114427.1	protein spinster homolog 1 isoform 1 [Homo sapiens]
P49591	case1-VS-control	3.96773	0.326605	12.1484	8	1.95e-06	1.71e-05	Up	P49591	Serine--tRNA ligase, cytoplasmic OS=Homo sapiens OX=9606 GN=SARS PE=1 SV=3	100	0	NP_006504.2	serine--tRNA ligase, cytoplasmic isoform a [Homo sapiens]
Q9Y584	case1-VS-control	-1.49744	0.123237	-12.1509	8	1.95e-06	1.71e-05	Down	Q9Y584	Mitochondrial import inner membrane translocase subunit Tim22 OS=Homo sapiens OX=9606 GN=TIMM22 PE=1 SV=2	100	2e-138	NP_037469.2	mitochondrial import inner membrane translocase subunit Tim22 [Homo sapiens]
Q14643	case1-VS-control	3.2058	0.129032	24.8449	5	1.97e-06	1.72e-05	Up	Q14643	Inositol 1,4,5-trisphosphate receptor type 1 OS=Homo sapiens OX=9606 GN=ITPR1 PE=1 SV=3	100	0	XP_011531985.1	PREDICTED: inositol 1,4,5-trisphosphate receptor type 1 isoform X2 [Homo sapiens]
P02786	case1-VS-control	-1.62466	0.134009	-12.1235	8	1.98e-06	1.72e-05	Down	P02786	Transferrin receptor protein 1 OS=Homo sapiens OX=9606 GN=TFRC PE=1 SV=2	100	0	NP_003225.2	transferrin receptor protein 1 isoform 1 [Homo sapiens]
Q14254	case1-VS-control	-2.02601	0.167117	-12.1233	8	1.98e-06	1.72e-05	Down	Q14254	Flotillin-2 OS=Homo sapiens OX=9606 GN=FLOT2 PE=1 SV=2	100	0	NP_004466.2	flotillin-2 isoform 1 [Homo sapiens]
P61225	case1-VS-control	-1.76285	0.145517	-12.1144	8	1.99e-06	1.73e-05	Down	P61225	Ras-related protein Rap-2b OS=Homo sapiens OX=9606 GN=RAP2B PE=1 SV=1	100	5e-133	NP_082988.1	ras-related protein Rap-2b precursor [Mus musculus]
Q9Y2Z9	case1-VS-control	-1.64028	0.135485	-12.1067	8	2e-06	1.73e-05	Down	Q9Y2Z9	Ubiquinone biosynthesis monooxygenase COQ6, mitochondrial OS=Homo sapiens OX=9606 GN=COQ6 PE=1 SV=2	100	0	NP_872282.1	ubiquinone biosynthesis monooxygenase COQ6, mitochondrial isoform a [Homo sapiens]
O60885	case1-VS-control	-1.1966	0.0988656	-12.1033	8	2.01e-06	1.73e-05	Down	O60885	Bromodomain-containing protein 4 OS=Homo sapiens OX=9606 GN=BRD4 PE=1 SV=2	100	0	NP_490597.1	bromodomain-containing protein 4 isoform long [Homo sapiens]
O95336	case1-VS-control	5.18153	0.364165	14.2285	7	2.01e-06	1.73e-05	Up	O95336	6-phosphogluconolactonase OS=Homo sapiens OX=9606 GN=PGLS PE=1 SV=2	100	0	NP_036220.1	6-phosphogluconolactonase [Homo sapiens]
P04899	case1-VS-control	-1.51306	0.125255	-12.0798	8	2.04e-06	1.75e-05	Down	P04899	Guanine nucleotide-binding protein G(i) subunit alpha-2 OS=Homo sapiens OX=9606 GN=GNAI2 PE=1 SV=3	100	0	NP_002061.1	guanine nucleotide-binding protein G(i) subunit alpha-2 isoform 1 [Homo sapiens]
P26232	case1-VS-control	-2.25472	0.186693	-12.0772	8	2.04e-06	1.75e-05	Down	P26232	Catenin alpha-2 OS=Homo sapiens OX=9606 GN=CTNNA2 PE=1 SV=5	100	0	XP_004090482.2	PREDICTED: catenin alpha-2 isoform X1 [Nomascus leucogenys]
Q8NG31	case1-VS-control	4.85425	0.341849	14.2	7	2.04e-06	1.75e-05	Up	Q8NG31	Kinetochore scaffold 1 OS=Homo sapiens OX=9606 GN=KNL1 PE=1 SV=3	100	0	NP_733468.3	kinetochore scaffold 1 isoform 1 [Homo sapiens]
P23284	case1-VS-control	-0.492982	0.0409101	-12.0504	8	2.08e-06	1.78e-05	None	P23284	Peptidyl-prolyl cis-trans isomerase B OS=Homo sapiens OX=9606 GN=PPIB PE=1 SV=2	100	8e-155	NP_000933.1	peptidyl-prolyl cis-trans isomerase B precursor [Homo sapiens]
O95861	case1-VS-control	4.21405	0.350487	12.0234	8	2.11e-06	1.8e-05	Up	O95861	3'(2'),5'-bisphosphate nucleotidase 1 OS=Homo sapiens OX=9606 GN=BPNT1 PE=1 SV=1	100	0	NP_006076.4	3'(2'),5'-bisphosphate nucleotidase 1 isoform 1 [Homo sapiens]
Q8N5M1	case1-VS-control	-2.28688	0.190441	-12.0083	8	2.13e-06	1.82e-05	Down	Q8N5M1	ATP synthase mitochondrial F1 complex assembly factor 2 OS=Homo sapiens OX=9606 GN=ATPAF2 PE=1 SV=1	100	0	NP_663729.1	ATP synthase mitochondrial F1 complex assembly factor 2 [Homo sapiens]
Q86WA6	case1-VS-control	-2.93855	0.245104	-11.989	8	2.16e-06	1.84e-05	Down	Q86WA6	Valacyclovir hydrolase OS=Homo sapiens OX=9606 GN=BPHL PE=1 SV=1	100	0	NP_004323.2	valacyclovir hydrolase isoform 1 precursor [Homo sapiens]
Q9H9J2	case1-VS-control	-1.38867	0.116043	-11.9668	8	2.19e-06	1.86e-05	Down	Q9H9J2	39S ribosomal protein L44, mitochondrial OS=Homo sapiens OX=9606 GN=MRPL44 PE=1 SV=1	100	0	NP_075066.1	39S ribosomal protein L44, mitochondrial [Homo sapiens]
Q14156	case1-VS-control	-2.88003	0.240846	-11.958	8	2.2e-06	1.87e-05	Down	Q14156	Protein EFR3 homolog A OS=Homo sapiens OX=9606 GN=EFR3A PE=1 SV=2	100	0	NP_055952.2	protein EFR3 homolog A isoform 1 [Homo sapiens]
P02794	case1-VS-control	3.57747	0.254876	14.0361	7	2.21e-06	1.87e-05	Up	P02794	Ferritin heavy chain OS=Homo sapiens OX=9606 GN=FTH1 PE=1 SV=2	99.454	2e-136	XP_009244536.1	PREDICTED: ferritin heavy chain isoform X1 [Pongo abelii]
P49756	case1-VS-control	-0.895865	0.074955	-11.952	8	2.21e-06	1.87e-05	None	P49756	RNA-binding protein 25 OS=Homo sapiens OX=9606 GN=RBM25 PE=1 SV=3	100	0	NP_067062.1	RNA-binding protein 25 [Homo sapiens]
Q7Z2W9	case1-VS-control	-0.996111	0.083418	-11.9412	8	2.23e-06	1.88e-05	None	Q7Z2W9	39S ribosomal protein L21, mitochondrial OS=Homo sapiens OX=9606 GN=MRPL21 PE=1 SV=2	100	4e-149	AAH55088.1	MRPL21 protein [Homo sapiens]
P61018	case1-VS-control	-2.50413	0.178855	-14.0009	7	2.25e-06	1.88e-05	Down	P61018	Ras-related protein Rab-4B OS=Homo sapiens OX=9606 GN=RAB4B PE=1 SV=1	100	2e-158	NP_001003275.1	ras-related protein Rab-4B [Canis lupus familiaris]
P83111	case1-VS-control	-2.08543	0.17485	-11.9269	8	2.25e-06	1.88e-05	Down	P83111	Serine beta-lactamase-like protein LACTB, mitochondrial OS=Homo sapiens OX=9606 GN=LACTB PE=1 SV=2	100	0	NP_116246.2	serine beta-lactamase-like protein LACTB, mitochondrial isoform a precursor [Homo sapiens]
Q8NCN5	case1-VS-control	-1.94039	0.162687	-11.9271	8	2.25e-06	1.88e-05	Down	Q8NCN5	Pyruvate dehydrogenase phosphatase regulatory subunit, mitochondrial OS=Homo sapiens OX=9606 GN=PDPR PE=1 SV=2	100	0	NP_060460.4	pyruvate dehydrogenase phosphatase regulatory subunit, mitochondrial isoform 1 precursor [Homo sapiens]
Q08752	case1-VS-control	2.52382	0.211746	11.9191	8	2.26e-06	1.89e-05	Up	Q08752	Peptidyl-prolyl cis-trans isomerase D OS=Homo sapiens OX=9606 GN=PPID PE=1 SV=3	100	0	NP_005029.1	peptidyl-prolyl cis-trans isomerase D [Homo sapiens]
Q8NBJ7	case1-VS-control	-1.07649	0.0903432	-11.9155	8	2.26e-06	1.89e-05	Down	Q8NBJ7	Inactive C-alpha-formylglycine-generating enzyme 2 OS=Homo sapiens OX=9606 GN=SUMF2 PE=1 SV=2	100	0	Q8NBJ7.2	RecName: Full=Sulfatase-modifying factor 2; AltName: Full=C-alpha-formylglycine-generating enzyme 2; Flags: Precursor
Q9BZE1	case1-VS-control	-1.18708	0.0998527	-11.8883	8	2.3e-06	1.92e-05	Down	Q9BZE1	39S ribosomal protein L37, mitochondrial OS=Homo sapiens OX=9606 GN=MRPL37 PE=1 SV=2	100	0	NP_057575.2	39S ribosomal protein L37, mitochondrial isoform 2 [Homo sapiens]
P38117	case1-VS-control	-1.44347	0.121639	-11.8668	8	2.33e-06	1.94e-05	Down	P38117	Electron transfer flavoprotein subunit beta OS=Homo sapiens OX=9606 GN=ETFB PE=1 SV=3	100	0	NP_001976.1	electron transfer flavoprotein subunit beta isoform 1 [Homo sapiens]
P30519	case1-VS-control	-2.02333	0.170627	-11.8582	8	2.35e-06	1.95e-05	Down	P30519	Heme oxygenase 2 OS=Homo sapiens OX=9606 GN=HMOX2 PE=1 SV=2	100	0	NP_002125.3	heme oxygenase 2 isoform b [Homo sapiens]
P29401	case1-VS-control	2.91399	0.245956	11.8476	8	2.36e-06	1.96e-05	Up	P29401	Transketolase OS=Homo sapiens OX=9606 GN=TKT PE=1 SV=3	100	0	NP_001055.1	transketolase isoform 1 [Homo sapiens]
P61604	case1-VS-control	-1.47105	0.12418	-11.8461	8	2.37e-06	1.96e-05	Down	P61604	10 kDa heat shock protein, mitochondrial OS=Homo sapiens OX=9606 GN=HSPE1 PE=1 SV=2	100	2e-65	NP_002148.1	10 kDa heat shock protein, mitochondrial [Homo sapiens]
Q99798	case1-VS-control	-1.90452	0.160887	-11.8376	8	2.38e-06	1.96e-05	Down	Q99798	Aconitate hydratase, mitochondrial OS=Homo sapiens OX=9606 GN=ACO2 PE=1 SV=2	100	0	NP_001089.1	aconitate hydratase, mitochondrial precursor [Homo sapiens]
Q9HB07	case1-VS-control	2.34143	0.19783	11.8356	8	2.38e-06	1.96e-05	Up	Q9HB07	UPF0160 protein MYG1, mitochondrial OS=Homo sapiens OX=9606 GN=C12orf10 PE=1 SV=2	100	0	Q9HB07.2	RecName: Full=UPF0160 protein MYG1, mitochondrial; Flags: Precursor
P50213	case1-VS-control	-1.99554	0.16897	-11.81	8	2.42e-06	1.99e-05	Down	P50213	Isocitrate dehydrogenase [NAD] subunit alpha, mitochondrial OS=Homo sapiens OX=9606 GN=IDH3A PE=1 SV=1	100	0	NP_005521.1	isocitrate dehydrogenase [NAD] subunit alpha, mitochondrial precursor [Homo sapiens]
Q9BSJ8	case1-VS-control	-0.958967	0.0812961	-11.796	8	2.44e-06	2.01e-05	None	Q9BSJ8	Extended synaptotagmin-1 OS=Homo sapiens OX=9606 GN=ESYT1 PE=1 SV=1	100	0	NP_056107.1	extended synaptotagmin-1 isoform 2 [Homo sapiens]
O94776	case1-VS-control	-1.61168	0.13674	-11.7864	8	2.46e-06	2.01e-05	Down	O94776	Metastasis-associated protein MTA2 OS=Homo sapiens OX=9606 GN=MTA2 PE=1 SV=1	100	0	NP_004730.2	metastasis-associated protein MTA2 isoform 1 [Homo sapiens]
P55011	case1-VS-control	-1.59548	0.135389	-11.7844	8	2.46e-06	2.01e-05	Down	P55011	Solute carrier family 12 member 2 OS=Homo sapiens OX=9606 GN=SLC12A2 PE=1 SV=1	100	0	NP_001037.1	solute carrier family 12 member 2 isoform 1 [Homo sapiens]
Q15293	case1-VS-control	-1.11979	0.0949982	-11.7875	8	2.46e-06	2.01e-05	Down	Q15293	Reticulocalbin-1 OS=Homo sapiens OX=9606 GN=RCN1 PE=1 SV=1	100	0	NP_002892.1	reticulocalbin-1 precursor [Homo sapiens]
P07686	case1-VS-control	-1.01669	0.0863843	-11.7694	8	2.49e-06	2.03e-05	Down	P07686	Beta-hexosaminidase subunit beta OS=Homo sapiens OX=9606 GN=HEXB PE=1 SV=3	100	0	NP_000512.1	beta-hexosaminidase subunit beta isoform 1 preproprotein [Homo sapiens]
Q6IAA8	case1-VS-control	-1.20793	0.102821	-11.748	8	2.52e-06	2.05e-05	Down	Q6IAA8	Ragulator complex protein LAMTOR1 OS=Homo sapiens OX=9606 GN=LAMTOR1 PE=1 SV=2	100	1e-114	NP_060377.1	ragulator complex protein LAMTOR1 [Homo sapiens]
Q86YV9	case1-VS-control	0.839777	0.0715239	11.7412	8	2.53e-06	2.05e-05	None	Q86YV9	Hermansky-Pudlak syndrome 6 protein OS=Homo sapiens OX=9606 GN=HPS6 PE=1 SV=1	100	0	NP_079023.2	Hermansky-Pudlak syndrome 6 protein [Homo sapiens]
Q8IXI1	case1-VS-control	-1.26637	0.10784	-11.743	8	2.53e-06	2.05e-05	Down	Q8IXI1	Mitochondrial Rho GTPase 2 OS=Homo sapiens OX=9606 GN=RHOT2 PE=1 SV=2	100	0	NP_620124.1	mitochondrial Rho GTPase 2 isoform 2 [Homo sapiens]
Q9BRP8	case1-VS-control	3.26504	0.278293	11.7324	8	2.55e-06	2.06e-05	Up	Q9BRP8	Partner of Y14 and mago OS=Homo sapiens OX=9606 GN=PYM1 PE=1 SV=1	100	9e-141	NP_115721.1	partner of Y14 and mago isoform 1 [Homo sapiens]
Q6UW02	case1-VS-control	-2.39876	0.204572	-11.7258	8	2.56e-06	2.07e-05	Down	Q6UW02	Cytochrome P450 20A1 OS=Homo sapiens OX=9606 GN=CYP20A1 PE=1 SV=1	100	0	NP_803882.1	cytochrome P450 20A1 [Homo sapiens]
O15067	case1-VS-control	3.82173	0.278694	13.713	7	2.58e-06	2.09e-05	Up	O15067	Phosphoribosylformylglycinamidine synthase OS=Homo sapiens OX=9606 GN=PFAS PE=1 SV=4	100	0	NP_036525.1	phosphoribosylformylglycinamidine synthase [Homo sapiens]
O95782	case1-VS-control	-1.31787	0.11265	-11.6988	8	2.6e-06	2.1e-05	Down	O95782	AP-2 complex subunit alpha-1 OS=Homo sapiens OX=9606 GN=AP2A1 PE=1 SV=3	100	0	NP_055018.2	AP-2 complex subunit alpha-1 isoform 1 [Homo sapiens]
P62330	case1-VS-control	-1.13368	0.0969562	-11.6927	8	2.61e-06	2.1e-05	Down	P62330	ADP-ribosylation factor 6 OS=Homo sapiens OX=9606 GN=ARF6 PE=1 SV=2	100	2e-129	XP_005376889.2	PREDICTED: ADP-ribosylation factor 6 [Chinchilla lanigera]
Q9BYD3	case1-VS-control	-1.18968	0.101798	-11.6867	8	2.62e-06	2.1e-05	Down	Q9BYD3	39S ribosomal protein L4, mitochondrial OS=Homo sapiens OX=9606 GN=MRPL4 PE=1 SV=1	100	0	NP_057040.2	39S ribosomal protein L4, mitochondrial isoform a [Homo sapiens]
Q9UKU7	case1-VS-control	-2.05688	0.175967	-11.689	8	2.62e-06	2.1e-05	Down	Q9UKU7	Isobutyryl-CoA dehydrogenase, mitochondrial OS=Homo sapiens OX=9606 GN=ACAD8 PE=1 SV=1	100	0	NP_055199.1	isobutyryl-CoA dehydrogenase, mitochondrial [Homo sapiens]
Q9Y446	case1-VS-control	2.05658	0.175966	11.6873	8	2.62e-06	2.1e-05	Up	Q9Y446	Plakophilin-3 OS=Homo sapiens OX=9606 GN=PKP3 PE=1 SV=1	100	0	NP_009114.1	plakophilin-3 isoform PKP3a [Homo sapiens]
Q8WVM0	case1-VS-control	-1.8256	0.156408	-11.672	8	2.65e-06	2.11e-05	Down	Q8WVM0	Dimethyladenosine transferase 1, mitochondrial OS=Homo sapiens OX=9606 GN=TFB1M PE=1 SV=1	100	0	NP_057104.2	dimethyladenosine transferase 1, mitochondrial isoform 1 [Homo sapiens]
Q9P0J0	case1-VS-control	-0.752135	0.0644822	-11.6642	8	2.66e-06	2.12e-05	None	Q9P0J0	NADH dehydrogenase [ubiquinone] 1 alpha subcomplex subunit 13 OS=Homo sapiens OX=9606 GN=NDUFA13 PE=1 SV=3	100	5e-103	AAH00589.2	NDUFA13 protein, partial [Homo sapiens]
O75955	case1-VS-control	-0.983402	0.0843482	-11.6588	8	2.67e-06	2.12e-05	None	O75955	Flotillin-1 OS=Homo sapiens OX=9606 GN=FLOT1 PE=1 SV=3	100	0	NP_005794.1	flotillin-1 isoform 1 [Homo sapiens]
Q8NI37	case1-VS-control	-1.63	0.139925	-11.6491	8	2.69e-06	2.13e-05	Down	Q8NI37	Protein phosphatase PTC7 homolog OS=Homo sapiens OX=9606 GN=PPTC7 PE=2 SV=1	100	0	NP_644812.1	protein phosphatase PTC7 homolog [Homo sapiens]
O60783	case1-VS-control	-2.24317	0.19267	-11.6426	8	2.7e-06	2.14e-05	Down	O60783	28S ribosomal protein S14, mitochondrial OS=Homo sapiens OX=9606 GN=MRPS14 PE=1 SV=1	100	8e-90	NP_071383.1	28S ribosomal protein S14, mitochondrial [Homo sapiens]
Q9BZG1	case1-VS-control	-1.19478	0.0706398	-16.9137	6	2.73e-06	2.16e-05	Down	Q9BZG1	Ras-related protein Rab-34 OS=Homo sapiens OX=9606 GN=RAB34 PE=1 SV=1	100	0	NP_114140.4	ras-related protein Rab-34 isoform 1 [Homo sapiens]
P09001	case1-VS-control	-1.19429	0.10295	-11.6007	8	2.77e-06	2.19e-05	Down	P09001	39S ribosomal protein L3, mitochondrial OS=Homo sapiens OX=9606 GN=MRPL3 PE=1 SV=1	100	0	NP_009139.1	39S ribosomal protein L3, mitochondrial [Homo sapiens]
Q9H089	case1-VS-control	-0.930819	0.0802394	-11.6005	8	2.77e-06	2.19e-05	None	Q9H089	Large subunit GTPase 1 homolog OS=Homo sapiens OX=9606 GN=LSG1 PE=1 SV=2	100	0	NP_060855.2	large subunit GTPase 1 homolog [Homo sapiens]
O14656	case1-VS-control	-2.69297	0.232385	-11.5884	8	2.8e-06	2.2e-05	Down	O14656	Torsin-1A OS=Homo sapiens OX=9606 GN=TOR1A PE=1 SV=1	100	0	EAW87907.1	torsin family 1, member A (torsin A), isoform CRA_a [Homo sapiens]
P22307	case1-VS-control	-1.7798	0.153596	-11.5875	8	2.8e-06	2.2e-05	Down	P22307	Non-specific lipid-transfer protein OS=Homo sapiens OX=9606 GN=SCP2 PE=1 SV=2	100	0	NP_002970.2	non-specific lipid-transfer protein isoform 1 precursor [Homo sapiens]
Q9UBC2	case1-VS-control	-0.941098	0.0812648	-11.5806	8	2.81e-06	2.21e-05	None	Q9UBC2	Epidermal growth factor receptor substrate 15-like 1 OS=Homo sapiens OX=9606 GN=EPS15L1 PE=1 SV=1	100	0	NP_001245303.1	epidermal growth factor receptor substrate 15-like 1 isoform 1 [Homo sapiens]
Q96ST3	case1-VS-control	-2.16819	0.187412	-11.5691	8	2.83e-06	2.22e-05	Down	Q96ST3	Paired amphipathic helix protein Sin3a OS=Homo sapiens OX=9606 GN=SIN3A PE=1 SV=2	100	0	NP_056292.1	paired amphipathic helix protein Sin3a [Homo sapiens]
P09543	case1-VS-control	-2.02239	0.174887	-11.564	8	2.84e-06	2.22e-05	Down	P09543	2',3'-cyclic-nucleotide 3'-phosphodiesterase OS=Homo sapiens OX=9606 GN=CNP PE=1 SV=2	100	0	NP_149124.3	2',3'-cyclic-nucleotide 3'-phosphodiesterase isoform 1 [Homo sapiens]
P15531	case1-VS-control	3.70592	0.320753	11.5538	8	2.86e-06	2.23e-05	Up	P15531	Nucleoside diphosphate kinase A OS=Homo sapiens OX=9606 GN=NME1 PE=1 SV=1	100	9e-111	XP_003272315.1	PREDICTED: nucleoside diphosphate kinase A isoform X1 [Nomascus leucogenys]
P32119	case1-VS-control	3.74185	0.323833	11.5549	8	2.86e-06	2.23e-05	Up	P32119	Peroxiredoxin-2 OS=Homo sapiens OX=9606 GN=PRDX2 PE=1 SV=5	100	8e-145	NP_005800.3	peroxiredoxin-2 [Homo sapiens]
P46977	case1-VS-control	-0.930488	0.08051	-11.5574	8	2.85e-06	2.23e-05	None	P46977	Dolichyl-diphosphooligosaccharide--protein glycosyltransferase subunit STT3A OS=Homo sapiens OX=9606 GN=STT3A PE=1 SV=2	100	0	NP_689926.1	dolichyl-diphosphooligosaccharide--protein glycosyltransferase subunit STT3A isoform a [Homo sapiens]
Q9NYH9	case1-VS-control	-1.02076	0.088366	-11.5516	8	2.86e-06	2.23e-05	Down	Q9NYH9	U3 small nucleolar RNA-associated protein 6 homolog OS=Homo sapiens OX=9606 GN=UTP6 PE=2 SV=2	100	0	NP_060898.2	U3 small nucleolar RNA-associated protein 6 homolog [Homo sapiens]
P11021	case1-VS-control	-1.35716	0.117554	-11.545	8	2.88e-06	2.23e-05	Down	P11021	Endoplasmic reticulum chaperone BiP OS=Homo sapiens OX=9606 GN=HSPA5 PE=1 SV=2	100	0	NP_005338.1	78 kDa glucose-regulated protein precursor [Homo sapiens]
Q9BRT2	case1-VS-control	-0.999116	0.0865779	-11.5401	8	2.89e-06	2.23e-05	None	Q9BRT2	Ubiquinol-cytochrome-c reductase complex assembly factor 2 OS=Homo sapiens OX=9606 GN=UQCC2 PE=1 SV=1	100	2e-89	NP_115716.1	ubiquinol-cytochrome-c reductase complex assembly factor 2 [Homo sapiens]
Q6IAN0	case1-VS-control	-1.68264	0.14607	-11.5194	8	2.93e-06	2.26e-05	Down	Q6IAN0	Dehydrogenase/reductase SDR family member 7B OS=Homo sapiens OX=9606 GN=DHRS7B PE=1 SV=2	100	0	NP_056325.2	dehydrogenase/reductase SDR family member 7B isoform 1 [Homo sapiens]
O95340	case1-VS-control	1.55389	0.115611	13.4406	7	2.96e-06	2.28e-05	Up	O95340	Bifunctional 3'-phosphoadenosine 5'-phosphosulfate synthase 2 OS=Homo sapiens OX=9606 GN=PAPSS2 PE=1 SV=2	100	0	NP_004661.2	bifunctional 3'-phosphoadenosine 5'-phosphosulfate synthase 2 isoform a [Homo sapiens]
Q70J99	case1-VS-control	5.1084	0.380409	13.4287	7	2.98e-06	2.29e-05	Up	Q70J99	Protein unc-13 homolog D OS=Homo sapiens OX=9606 GN=UNC13D PE=1 SV=1	100	0	NP_954712.1	protein unc-13 homolog D [Homo sapiens]
P47897	case1-VS-control	1.09972	0.0959896	11.4567	8	3.05e-06	2.34e-05	Up	P47897	Glutamine--tRNA ligase OS=Homo sapiens OX=9606 GN=QARS PE=1 SV=1	100	0	NP_005042.1	glutamine--tRNA ligase isoform a [Homo sapiens]
P49411	case1-VS-control	-0.656749	0.0573259	-11.4564	8	3.05e-06	2.34e-05	None	P49411	Elongation factor Tu, mitochondrial OS=Homo sapiens OX=9606 GN=TUFM PE=1 SV=2	100	0	NP_003312.3	elongation factor Tu, mitochondrial precursor [Homo sapiens]
O60568	case1-VS-control	-1.43397	0.125414	-11.4339	8	3.1e-06	2.37e-05	Down	O60568	Procollagen-lysine,2-oxoglutarate 5-dioxygenase 3 OS=Homo sapiens OX=9606 GN=PLOD3 PE=1 SV=1	100	0	NP_001075.1	procollagen-lysine,2-oxoglutarate 5-dioxygenase 3 precursor [Homo sapiens]
Q06830	case1-VS-control	2.60942	0.228371	11.4262	8	3.11e-06	2.38e-05	Up	Q06830	Peroxiredoxin-1 OS=Homo sapiens OX=9606 GN=PRDX1 PE=1 SV=1	100	2e-146	NP_002565.1	peroxiredoxin-1 [Homo sapiens]
Q8IWA5	case1-VS-control	-3.1511	0.276015	-11.4164	8	3.13e-06	2.39e-05	Down	Q8IWA5	Choline transporter-like protein 2 OS=Homo sapiens OX=9606 GN=SLC44A2 PE=1 SV=3	99.858	0	CBJ93592.1	solute carrier family 44, member 2 [Homo sapiens]
Q96A35	case1-VS-control	-1.33216	0.116702	-11.4151	8	3.13e-06	2.39e-05	Down	Q96A35	39S ribosomal protein L24, mitochondrial OS=Homo sapiens OX=9606 GN=MRPL24 PE=1 SV=1	100	2e-157	NP_078816.2	39S ribosomal protein L24, mitochondrial [Homo sapiens]
P50897	case1-VS-control	-1.48559	0.130227	-11.4077	8	3.15e-06	2.4e-05	Down	P50897	Palmitoyl-protein thioesterase 1 OS=Homo sapiens OX=9606 GN=PPT1 PE=1 SV=1	100	0	NP_000301.1	palmitoyl-protein thioesterase 1 isoform 1 precursor [Homo sapiens]
Q2PZI1	case1-VS-control	-1.55988	0.136782	-11.4041	8	3.16e-06	2.4e-05	Down	Q2PZI1	Probable C-mannosyltransferase DPY19L1 OS=Homo sapiens OX=9606 GN=DPY19L1 PE=2 SV=1	100	0	NP_056098.1	probable C-mannosyltransferase DPY19L1 [Homo sapiens]
Q6ZVM7	case1-VS-control	-1.2758	0.111855	-11.4059	8	3.15e-06	2.4e-05	Down	Q6ZVM7	TOM1-like protein 2 OS=Homo sapiens OX=9606 GN=TOM1L2 PE=1 SV=1	100	0	NP_001076437.1	TOM1-like protein 2 isoform 3 [Homo sapiens]
Q5BKZ1	case1-VS-control	-1.20528	0.10582	-11.3899	8	3.19e-06	2.41e-05	Down	Q5BKZ1	DBIRD complex subunit ZNF326 OS=Homo sapiens OX=9606 GN=ZNF326 PE=1 SV=2	100	0	NP_892021.1	DBIRD complex subunit ZNF326 isoform 1 [Homo sapiens]
P82979	case1-VS-control	2.12747	0.186891	11.3835	8	3.2e-06	2.42e-05	Up	P82979	SAP domain-containing ribonucleoprotein OS=Homo sapiens OX=9606 GN=SARNP PE=1 SV=3	100	7e-148	NP_149073.1	SAP domain-containing ribonucleoprotein [Homo sapiens]
Q6PIW4	case1-VS-control	1.00351	0.0881375	11.3857	8	3.2e-06	2.42e-05	Up	Q6PIW4	Fidgetin-like protein 1 OS=Homo sapiens OX=9606 GN=FIGNL1 PE=1 SV=2	100	0	NP_071399.2	fidgetin-like protein 1 isoform 1 [Homo sapiens]
Q9UP95	case1-VS-control	-0.875952	0.0770109	-11.3744	8	3.22e-06	2.43e-05	None	Q9UP95	Solute carrier family 12 member 4 OS=Homo sapiens OX=9606 GN=SLC12A4 PE=1 SV=2	100	0	NP_005063.1	solute carrier family 12 member 4 isoform a [Homo sapiens]
P42695	case1-VS-control	-1.55507	0.136854	-11.3629	8	3.25e-06	2.44e-05	Down	P42695	Condensin-2 complex subunit D3 OS=Homo sapiens OX=9606 GN=NCAPD3 PE=1 SV=2	100	0	NP_056076.1	condensin-2 complex subunit D3 [Homo sapiens]
Q92597	case1-VS-control	5.04242	0.380428	13.2546	7	3.25e-06	2.44e-05	Up	Q92597	Protein NDRG1 OS=Homo sapiens OX=9606 GN=NDRG1 PE=1 SV=1	100	0	NP_006087.2	protein NDRG1 isoform 1 [Homo sapiens]
O00194	case1-VS-control	1.56951	0.13827	11.351	8	3.27e-06	2.45e-05	Up	O00194	Ras-related protein Rab-27B OS=Homo sapiens OX=9606 GN=RAB27B PE=1 SV=4	99.541	1e-163	XP_008012218.1	PREDICTED: ras-related protein Rab-27B isoform X1 [Chlorocebus sabaeus]
O00468	case1-VS-control	-1.02925	0.0908557	-11.3284	8	3.32e-06	2.49e-05	Down	O00468	Agrin OS=Homo sapiens OX=9606 GN=AGRN PE=1 SV=6	100	0	NP_001292204.1	agrin isoform 1 precursor [Homo sapiens]
O95104	case1-VS-control	-1.50243	0.132888	-11.306	8	3.37e-06	2.51e-05	Down	O95104	Splicing factor, arginine/serine-rich 15 OS=Homo sapiens OX=9606 GN=SCAF4 PE=1 SV=3	100	0	NP_065757.1	splicing factor, arginine/serine-rich 15 isoform 1 [Homo sapiens]
P54920	case1-VS-control	-1.96515	0.17384	-11.3044	8	3.37e-06	2.51e-05	Down	P54920	Alpha-soluble NSF attachment protein OS=Homo sapiens OX=9606 GN=NAPA PE=1 SV=3	100	0	NP_003818.2	alpha-soluble NSF attachment protein [Homo sapiens]
Q6PJG6	case1-VS-control	2.3373	0.177311	13.1819	7	3.38e-06	2.51e-05	Up	Q6PJG6	BRCA1-associated ATM activator 1 OS=Homo sapiens OX=9606 GN=BRAT1 PE=1 SV=2	100	0	NP_689956.2	BRCA1-associated ATM activator 1 isoform 2 [Homo sapiens]
Q8WUY8	case1-VS-control	-1.8596	0.164435	-11.309	8	3.36e-06	2.51e-05	Down	Q8WUY8	N-acetyltransferase 14 OS=Homo sapiens OX=9606 GN=NAT14 PE=1 SV=1	100	1e-139	NP_065111.1	N-acetyltransferase 14 [Homo sapiens]
P17931	case1-VS-control	1.24606	0.110272	11.2999	8	3.39e-06	2.51e-05	Up	P17931	Galectin-3 OS=Homo sapiens OX=9606 GN=LGALS3 PE=1 SV=5	100	9e-179	NP_002297.2	galectin-3 isoform 1 [Homo sapiens]
P61106	case1-VS-control	-1.5125	0.134043	-11.2837	8	3.42e-06	2.54e-05	Down	P61106	Ras-related protein Rab-14 OS=Homo sapiens OX=9606 GN=RAB14 PE=1 SV=4	100	2e-162	XP_013044238.1	PREDICTED: ras-related protein Rab-14 isoform X1 [Anser cygnoides domesticus]
Q9H9Y2	case1-VS-control	-2.42213	0.214853	-11.2734	8	3.45e-06	2.55e-05	Down	Q9H9Y2	Ribosome production factor 1 OS=Homo sapiens OX=9606 GN=RPF1 PE=1 SV=2	100	0	NP_079341.2	ribosome production factor 1 [Homo sapiens]
Q12904	case1-VS-control	1.56449	0.138822	11.2697	8	3.45e-06	2.55e-05	Up	Q12904	Aminoacyl tRNA synthase complex-interacting multifunctional protein 1 OS=Homo sapiens OX=9606 GN=AIMP1 PE=1 SV=2	100	0	NP_004748.2	aminoacyl tRNA synthase complex-interacting multifunctional protein 1 isoform a precursor [Homo sapiens]
Q9NSI6	case1-VS-control	-3.10892	0.276083	-11.2608	8	3.48e-06	2.56e-05	Down	Q9NSI6	Bromodomain and WD repeat-containing protein 1 OS=Homo sapiens OX=9606 GN=BRWD1 PE=1 SV=4	100	0	NP_061836.2	bromodomain and WD repeat-containing protein 1 isoform A [Homo sapiens]
O75909	case1-VS-control	-1.13371	0.100826	-11.2443	8	3.51e-06	2.59e-05	Down	O75909	Cyclin-K OS=Homo sapiens OX=9606 GN=CCNK PE=1 SV=2	100	0	NP_001092872.1	cyclin-K [Homo sapiens]
P61769	case1-VS-control	-1.72367	0.153413	-11.2355	8	3.53e-06	2.6e-05	Down	P61769	Beta-2-microglobulin OS=Homo sapiens OX=9606 GN=B2M PE=1 SV=1	99.16	2e-84	CAG33347.1	B2M [Homo sapiens]
Q15084	case1-VS-control	-1.33124	0.118549	-11.2295	8	3.55e-06	2.61e-05	Down	Q15084	Protein disulfide-isomerase A6 OS=Homo sapiens OX=9606 GN=PDIA6 PE=1 SV=1	100	0	NP_005733.1	protein disulfide-isomerase A6 isoform d precursor [Homo sapiens]
P62714	case1-VS-control	1.486	0.132432	11.2209	8	3.57e-06	2.62e-05	Up	P62714;P67775	Serine/threonine-protein phosphatase 2A catalytic subunit beta isoform OS=Homo sapiens OX=9606 GN=PPP2CB PE=1 SV=1	100	0	NP_058736.1	serine/threonine-protein phosphatase 2A catalytic subunit beta isoform [Rattus norvegicus]
Q8IVL5	case1-VS-control	-3.00943	0.186456	-16.1402	6	3.6e-06	2.63e-05	Down	Q8IVL5	Prolyl 3-hydroxylase 2 OS=Homo sapiens OX=9606 GN=P3H2 PE=1 SV=1	99.859	0	BAG51712.1	unnamed protein product [Homo sapiens]
P30048	case1-VS-control	-1.49621	0.133644	-11.1955	8	3.63e-06	2.65e-05	Down	P30048	Thioredoxin-dependent peroxide reductase, mitochondrial OS=Homo sapiens OX=9606 GN=PRDX3 PE=1 SV=3	100	0	NP_006784.1	thioredoxin-dependent peroxide reductase, mitochondrial isoform a precursor [Homo sapiens]
Q69YN4	case1-VS-control	-0.973677	0.0869789	-11.1944	8	3.63e-06	2.65e-05	None	Q69YN4	Protein virilizer homolog OS=Homo sapiens OX=9606 GN=VIRMA PE=1 SV=2	100	0	NP_056311.2	protein virilizer homolog isoform 1 [Homo sapiens]
Q9UL25	case1-VS-control	-1.27322	0.11381	-11.1872	8	3.65e-06	2.66e-05	Down	Q9UL25	Ras-related protein Rab-21 OS=Homo sapiens OX=9606 GN=RAB21 PE=1 SV=3	100	2e-166	NP_055814.1	ras-related protein Rab-21 [Homo sapiens]
Q13242	case1-VS-control	-1.63282	0.146072	-11.1782	8	3.67e-06	2.67e-05	Down	Q13242	Serine/arginine-rich splicing factor 9 OS=Homo sapiens OX=9606 GN=SRSF9 PE=1 SV=1	100	1e-158	NP_003760.1	serine/arginine-rich splicing factor 9 [Homo sapiens]
Q8N8A6	case1-VS-control	-1.70205	0.152278	-11.1772	8	3.68e-06	2.67e-05	Down	Q8N8A6	ATP-dependent RNA helicase DDX51 OS=Homo sapiens OX=9606 GN=DDX51 PE=1 SV=3	100	0	NP_778236.2	ATP-dependent RNA helicase DDX51 [Homo sapiens]
Q12769	case1-VS-control	-1.33029	0.119084	-11.1711	8	3.69e-06	2.67e-05	Down	Q12769	Nuclear pore complex protein Nup160 OS=Homo sapiens OX=9606 GN=NUP160 PE=1 SV=3	100	0	NP_056046.1	nuclear pore complex protein Nup160 isoform 1 [Homo sapiens]
Q5VW32	case1-VS-control	2.95347	0.26436	11.1721	8	3.69e-06	2.67e-05	Up	Q5VW32	BRO1 domain-containing protein BROX OS=Homo sapiens OX=9606 GN=BROX PE=1 SV=1	100	0	XP_006711236.1	PREDICTED: BRO1 domain-containing protein BROX isoform X3 [Homo sapiens]
P20340	case1-VS-control	-1.10471	0.0989934	-11.1595	8	3.72e-06	2.69e-05	Down	P20340	Ras-related protein Rab-6A OS=Homo sapiens OX=9606 GN=RAB6A PE=1 SV=3	100	6e-153	NP_942599.1	ras-related protein Rab-6A isoform b [Homo sapiens]
P23921	case1-VS-control	1.9692	0.176507	11.1565	8	3.73e-06	2.69e-05	Up	P23921	Ribonucleoside-diphosphate reductase large subunit OS=Homo sapiens OX=9606 GN=RRM1 PE=1 SV=1	100	0	NP_001024.1	ribonucleoside-diphosphate reductase large subunit isoform 1 [Homo sapiens]
Q9BXV9	case1-VS-control	2.65644	0.204504	12.9897	7	3.73e-06	2.69e-05	Up	Q9BXV9	EKC/KEOPS complex subunit GON7 OS=Homo sapiens OX=9606 GN=GON7 PE=1 SV=2	100	6e-67	NP_115879.2	EKC/KEOPS complex subunit GON7 [Homo sapiens]
Q00765	case1-VS-control	-1.14253	0.102605	-11.1353	8	3.78e-06	2.72e-05	Down	Q00765	Receptor expression-enhancing protein 5 OS=Homo sapiens OX=9606 GN=REEP5 PE=1 SV=3	100	2e-138	NP_005660.4	receptor expression-enhancing protein 5 [Homo sapiens]
Q96J84	case1-VS-control	-2.80265	0.128623	-21.7897	5	3.78e-06	2.72e-05	Down	Q96J84	Kin of IRRE-like protein 1 OS=Homo sapiens OX=9606 GN=KIRREL1 PE=1 SV=2	100	0	NP_060710.3	kin of IRRE-like protein 1 isoform 1 precursor [Homo sapiens]
Q14166	case1-VS-control	2.6945	0.242826	11.0964	8	3.88e-06	2.78e-05	Up	Q14166	Tubulin--tyrosine ligase-like protein 12 OS=Homo sapiens OX=9606 GN=TTLL12 PE=1 SV=2	100	0	NP_055955.1	tubulin--tyrosine ligase-like protein 12 [Homo sapiens]
Q96BP3	case1-VS-control	-1.03855	0.0935737	-11.0987	8	3.88e-06	2.78e-05	Down	Q96BP3	Peptidylprolyl isomerase domain and WD repeat-containing protein 1 OS=Homo sapiens OX=9606 GN=PPWD1 PE=1 SV=1	100	0	NP_056157.1	peptidylprolyl isomerase domain and WD repeat-containing protein 1 isoform 1 [Homo sapiens]
O75448	case1-VS-control	-0.850395	0.076667	-11.0921	8	3.9e-06	2.78e-05	None	O75448	Mediator of RNA polymerase II transcription subunit 24 OS=Homo sapiens OX=9606 GN=MED24 PE=1 SV=1	100	0	NP_055630.2	mediator of RNA polymerase II transcription subunit 24 isoform 1 [Homo sapiens]
O95456	case1-VS-control	2.40854	0.217221	11.0879	8	3.91e-06	2.79e-05	Up	O95456	Proteasome assembly chaperone 1 OS=Homo sapiens OX=9606 GN=PSMG1 PE=1 SV=1	100	0	NP_003711.1	proteasome assembly chaperone 1 isoform a [Homo sapiens]
Q02809	case1-VS-control	-1.00202	0.0903894	-11.0856	8	3.91e-06	2.79e-05	Down	Q02809	Procollagen-lysine,2-oxoglutarate 5-dioxygenase 1 OS=Homo sapiens OX=9606 GN=PLOD1 PE=1 SV=2	100	0	NP_000293.2	procollagen-lysine,2-oxoglutarate 5-dioxygenase 1 isoform 2 precursor [Homo sapiens]
P12236	case1-VS-control	0.869751	0.078533	11.075	8	3.94e-06	2.8e-05	None	P12236	ADP/ATP translocase 3 OS=Homo sapiens OX=9606 GN=SLC25A6 PE=1 SV=4	100	0	BAD93059.1	ADP,ATP carrier protein, liver isoform T2 variant, partial [Homo sapiens]
P20839	case1-VS-control	2.12198	0.191714	11.0684	8	3.96e-06	2.81e-05	Up	P20839	Inosine-5'-monophosphate dehydrogenase 1 OS=Homo sapiens OX=9606 GN=IMPDH1 PE=1 SV=2	100	0	XP_016867661.1	PREDICTED: inosine-5'-monophosphate dehydrogenase 1 isoform X5 [Homo sapiens]
Q02818	case1-VS-control	-1.16049	0.104913	-11.0615	8	3.98e-06	2.82e-05	Down	Q02818	Nucleobindin-1 OS=Homo sapiens OX=9606 GN=NUCB1 PE=1 SV=4	100	0	NP_006175.2	nucleobindin-1 precursor [Homo sapiens]
Q86Y82	case1-VS-control	-2.26487	0.204785	-11.0597	8	3.98e-06	2.82e-05	Down	Q86Y82	Syntaxin-12 OS=Homo sapiens OX=9606 GN=STX12 PE=1 SV=1	100	0	NP_803173.1	syntaxin-12 [Homo sapiens]
Q9Y232	case1-VS-control	-2.72606	0.246565	-11.0562	8	3.99e-06	2.82e-05	Down	Q9Y232	Chromodomain Y-like protein OS=Homo sapiens OX=9606 GN=CDYL PE=1 SV=2	100	0	Q9Y232.2	RecName: Full=Chromodomain Y-like protein; Short=CDY-like
P01034	case1-VS-control	-1.79978	0.162873	-11.0502	8	4.01e-06	2.83e-05	Down	P01034	Cystatin-C OS=Homo sapiens OX=9606 GN=CST3 PE=1 SV=1	100	8e-106	NP_000090.1	cystatin-C precursor [Homo sapiens]
Q9NR31	case1-VS-control	0.941537	0.0853143	11.0361	8	4.05e-06	2.85e-05	None	Q9NR31	GTP-binding protein SAR1a OS=Homo sapiens OX=9606 GN=SAR1A PE=1 SV=1	100	6e-146	NP_064535.1	GTP-binding protein SAR1a [Homo sapiens]
Q16563	case1-VS-control	-2.05478	0.18624	-11.033	8	4.06e-06	2.85e-05	Down	Q16563	Synaptophysin-like protein 1 OS=Homo sapiens OX=9606 GN=SYPL1 PE=1 SV=1	100	0	NP_006745.1	synaptophysin-like protein 1 isoform a [Homo sapiens]
Q9Y624	case1-VS-control	-1.20525	0.109324	-11.0246	8	4.08e-06	2.87e-05	Down	Q9Y624	Junctional adhesion molecule A OS=Homo sapiens OX=9606 GN=F11R PE=1 SV=1	100	0	NP_058642.1	junctional adhesion molecule A isoform 1 precursor [Homo sapiens]
Q969X5	case1-VS-control	1.13955	0.103399	11.0209	8	4.09e-06	2.87e-05	Up	Q969X5	Endoplasmic reticulum-Golgi intermediate compartment protein 1 OS=Homo sapiens OX=9606 GN=ERGIC1 PE=1 SV=1	100	0	NP_001026881.1	endoplasmic reticulum-Golgi intermediate compartment protein 1 [Homo sapiens]
Q96CS3	case1-VS-control	-0.771368	0.0700913	-11.0052	8	4.13e-06	2.9e-05	None	Q96CS3	FAS-associated factor 2 OS=Homo sapiens OX=9606 GN=FAF2 PE=1 SV=2	100	0	NP_055428.1	FAS-associated factor 2 [Homo sapiens]
Q02338	case1-VS-control	-3.10596	0.197364	-15.7372	6	4.17e-06	2.92e-05	Down	Q02338	D-beta-hydroxybutyrate dehydrogenase, mitochondrial OS=Homo sapiens OX=9606 GN=BDH1 PE=1 SV=3	100	0	NP_004042.1	D-beta-hydroxybutyrate dehydrogenase, mitochondrial precursor [Homo sapiens]
P57678	case1-VS-control	1.73328	0.157785	10.9851	8	4.19e-06	2.93e-05	Up	P57678	Gem-associated protein 4 OS=Homo sapiens OX=9606 GN=GEMIN4 PE=1 SV=2	100	0	NP_056536.2	gem-associated protein 4 [Homo sapiens]
P18074	case1-VS-control	-0.866469	0.0789216	-10.9789	8	4.21e-06	2.93e-05	None	P18074	General transcription and DNA repair factor IIH helicase subunit XPD OS=Homo sapiens OX=9606 GN=ERCC2 PE=1 SV=1	100	0	NP_000391.1	TFIIH basal transcription factor complex helicase XPD subunit isoform 1 [Homo sapiens]
Q5BJD5	case1-VS-control	-1.23795	0.112764	-10.9782	8	4.21e-06	2.93e-05	Down	Q5BJD5	Transmembrane protein 41B OS=Homo sapiens OX=9606 GN=TMEM41B PE=1 SV=1	100	0	NP_055827.1	transmembrane protein 41B isoform 1 [Homo sapiens]
O14681	case1-VS-control	-0.971591	0.0885722	-10.9695	8	4.24e-06	2.94e-05	None	O14681	Etoposide-induced protein 2.4 homolog OS=Homo sapiens OX=9606 GN=EI24 PE=1 SV=4	100	0	NP_004870.3	etoposide-induced protein 2.4 homolog isoform 1 [Homo sapiens]
Q8TDW0	case1-VS-control	2.34162	0.14919	15.6955	6	4.24e-06	2.94e-05	Up	Q8TDW0	Volume-regulated anion channel subunit LRRC8C OS=Homo sapiens OX=9606 GN=LRRC8C PE=1 SV=2	100	0	XP_006711023.1	PREDICTED: volume-regulated anion channel subunit LRRC8C isoform X1 [Homo sapiens]
Q5XKE5	case1-VS-control	-1.12069	0.102248	-10.9604	8	4.26e-06	2.95e-05	Down	Q5XKE5	Keratin, type II cytoskeletal 79 OS=Homo sapiens OX=9606 GN=KRT79 PE=1 SV=2	100	0	NP_787028.1	keratin, type II cytoskeletal 79 [Homo sapiens]
Q9NXA8	case1-VS-control	-1.3727	0.125225	-10.9619	8	4.26e-06	2.95e-05	Down	Q9NXA8	NAD-dependent protein deacylase sirtuin-5, mitochondrial OS=Homo sapiens OX=9606 GN=SIRT5 PE=1 SV=2	100	0	NP_036373.1	NAD-dependent protein deacylase sirtuin-5, mitochondrial isoform 1 [Homo sapiens]
Q9Y305	case1-VS-control	-0.923125	0.0842311	-10.9594	8	4.27e-06	2.95e-05	None	Q9Y305	Acyl-coenzyme A thioesterase 9, mitochondrial OS=Homo sapiens OX=9606 GN=ACOT9 PE=1 SV=2	100	0	NP_001028755.2	acyl-coenzyme A thioesterase 9, mitochondrial isoform b precursor [Homo sapiens]
P28715	case1-VS-control	2.41106	0.220366	10.9412	8	4.32e-06	2.98e-05	Up	P28715	DNA repair protein complementing XP-G cells OS=Homo sapiens OX=9606 GN=ERCC5 PE=1 SV=3	100	0	P28715.3	RecName: Full=DNA repair protein complementing XP-G cells; AltName: Full=DNA excision repair protein ERCC-5; AltName: Full=Xeroderma pigmentosum group G-complementing protein
P12270	case1-VS-control	-1.14727	0.104941	-10.9325	8	4.35e-06	2.99e-05	Down	P12270	Nucleoprotein TPR OS=Homo sapiens OX=9606 GN=TPR PE=1 SV=3	100	0	NP_003283.2	nucleoprotein TPR [Homo sapiens]
Q92804	case1-VS-control	-1.00504	0.0919621	-10.9288	8	4.36e-06	3e-05	Down	Q92804	TATA-binding protein-associated factor 2N OS=Homo sapiens OX=9606 GN=TAF15 PE=1 SV=1	100	0	NP_631961.1	TATA-binding protein-associated factor 2N isoform 1 [Homo sapiens]
P61019	case1-VS-control	-1.47095	0.134727	-10.918	8	4.39e-06	3.01e-05	Down	P61019	Ras-related protein Rab-2A OS=Homo sapiens OX=9606 GN=RAB2A PE=1 SV=1	100	9e-158	NP_002856.1	ras-related protein Rab-2A isoform a [Homo sapiens]
Q15648	case1-VS-control	-1.68554	0.154461	-10.9124	8	4.41e-06	3.02e-05	Down	Q15648	Mediator of RNA polymerase II transcription subunit 1 OS=Homo sapiens OX=9606 GN=MED1 PE=1 SV=4	100	0	NP_004765.2	mediator of RNA polymerase II transcription subunit 1 [Homo sapiens]
P22033	case1-VS-control	-1.18974	0.109125	-10.9026	8	4.44e-06	3.04e-05	Down	P22033	Methylmalonyl-CoA mutase, mitochondrial OS=Homo sapiens OX=9606 GN=MUT PE=1 SV=4	100	0	NP_000246.2	methylmalonyl-CoA mutase, mitochondrial precursor [Homo sapiens]
P49406	case1-VS-control	-1.2857	0.11801	-10.8948	8	4.46e-06	3.05e-05	Down	P49406	39S ribosomal protein L19, mitochondrial OS=Homo sapiens OX=9606 GN=MRPL19 PE=1 SV=2	100	0	NP_055578.2	39S ribosomal protein L19, mitochondrial [Homo sapiens]
P61020	case1-VS-control	-1.3624	0.125221	-10.88	8	4.51e-06	3.07e-05	Down	P61020	Ras-related protein Rab-5B OS=Homo sapiens OX=9606 GN=RAB5B PE=1 SV=1	100	3e-161	NP_002859.1	ras-related protein Rab-5B isoform 1 [Homo sapiens]
Q12841	case1-VS-control	-4.88223	0.232163	-21.0293	5	4.51e-06	3.07e-05	Down	Q12841	Follistatin-related protein 1 OS=Homo sapiens OX=9606 GN=FSTL1 PE=1 SV=1	100	0	NP_009016.1	follistatin-related protein 1 precursor [Homo sapiens]
Q13636	case1-VS-control	-1.3798	0.0888402	-15.5313	6	4.51e-06	3.07e-05	Down	Q13636	Ras-related protein Rab-31 OS=Homo sapiens OX=9606 GN=RAB31 PE=1 SV=1	100	3e-145	NP_006859.2	ras-related protein Rab-31 [Homo sapiens]
Q9H5Q4	case1-VS-control	0.785749	0.0722364	10.8775	8	4.51e-06	3.07e-05	None	Q9H5Q4	Dimethyladenosine transferase 2, mitochondrial OS=Homo sapiens OX=9606 GN=TFB2M PE=1 SV=1	100	0	NP_071761.1	dimethyladenosine transferase 2, mitochondrial [Homo sapiens]
Q9NS69	case1-VS-control	-1.31244	0.120666	-10.8767	8	4.52e-06	3.07e-05	Down	Q9NS69	Mitochondrial import receptor subunit TOM22 homolog OS=Homo sapiens OX=9606 GN=TOMM22 PE=1 SV=3	100	8e-97	NP_064628.1	mitochondrial import receptor subunit TOM22 homolog [Homo sapiens]
P36957	case1-VS-control	-1.54763	0.142347	-10.8723	8	4.53e-06	3.07e-05	Down	P36957	Dihydrolipoyllysine-residue succinyltransferase component of 2-oxoglutarate dehydrogenase complex, mitochondrial OS=Homo sapiens OX=9606 GN=DLST PE=1 SV=4	100	0	NP_001924.2	dihydrolipoyllysine-residue succinyltransferase component of 2-oxoglutarate dehydrogenase complex, mitochondrial isoform 1 precursor [Homo sapiens]
P00505	case1-VS-control	-1.47405	0.135769	-10.8571	8	4.58e-06	3.1e-05	Down	P00505	Aspartate aminotransferase, mitochondrial OS=Homo sapiens OX=9606 GN=GOT2 PE=1 SV=3	100	0	NP_002071.2	aspartate aminotransferase, mitochondrial isoform 1 precursor [Homo sapiens]
Q03701	case1-VS-control	-0.970744	0.0894914	-10.8473	8	4.61e-06	3.11e-05	None	Q03701	CCAAT/enhancer-binding protein zeta OS=Homo sapiens OX=9606 GN=CEBPZ PE=1 SV=3	100	0	NP_005751.2	CCAAT/enhancer-binding protein zeta [Homo sapiens]
P28347	case1-VS-control	-2.07545	0.165007	-12.578	7	4.63e-06	3.12e-05	Down	P28347	Transcriptional enhancer factor TEF-1 OS=Homo sapiens OX=9606 GN=TEAD1 PE=1 SV=2	100	0	NP_068780.2	transcriptional enhancer factor TEF-1 [Homo sapiens]
P31040	case1-VS-control	-1.8186	0.167752	-10.841	8	4.63e-06	3.12e-05	Down	P31040	Succinate dehydrogenase [ubiquinone] flavoprotein subunit, mitochondrial OS=Homo sapiens OX=9606 GN=SDHA PE=1 SV=2	99.849	0	BAD92228.1	succinate dehydrogenase complex, subunit A, flavoprotein precursor variant, partial [Homo sapiens]
P31930	case1-VS-control	-1.23915	0.114359	-10.8356	8	4.65e-06	3.13e-05	Down	P31930	Cytochrome b-c1 complex subunit 1, mitochondrial OS=Homo sapiens OX=9606 GN=UQCRC1 PE=1 SV=3	100	0	NP_003356.2	cytochrome b-c1 complex subunit 1, mitochondrial precursor [Homo sapiens]
Q92506	case1-VS-control	1.75346	0.16213	10.8152	8	4.71e-06	3.17e-05	Up	Q92506	Estradiol 17-beta-dehydrogenase 8 OS=Homo sapiens OX=9606 GN=HSD17B8 PE=1 SV=2	100	0	NP_055049.1	estradiol 17-beta-dehydrogenase 8 [Homo sapiens]
P30085	case1-VS-control	3.67725	0.340739	10.792	8	4.79e-06	3.21e-05	Up	P30085	UMP-CMP kinase OS=Homo sapiens OX=9606 GN=CMPK1 PE=1 SV=3	100	3e-143	P30085.3	RecName: Full=UMP-CMP kinase; AltName: Full=Deoxycytidylate kinase; Short=CK; Short=dCMP kinase; AltName: Full=Nucleoside-diphosphate kinase; AltName: Full=Uridine monophosphate/cytidine monophosphate kinase; Short=UMP/CMP kinase; Short=UMP/CMPK
P11532	case1-VS-control	1.82949	0.119123	15.358	6	4.82e-06	3.22e-05	Up	P11532	Dystrophin OS=Homo sapiens OX=9606 GN=DMD PE=1 SV=3	100	0	P11532.3	RecName: Full=Dystrophin
Q6L8Q7	case1-VS-control	0.92106	0.0854147	10.7834	8	4.82e-06	3.22e-05	None	Q6L8Q7	2',5'-phosphodiesterase 12 OS=Homo sapiens OX=9606 GN=PDE12 PE=1 SV=2	100	0	NP_808881.3	2',5'-phosphodiesterase 12 isoform 1 precursor [Homo sapiens]
Q13428	case1-VS-control	-1.66604	0.154591	-10.777	8	4.84e-06	3.23e-05	Down	Q13428	Treacle protein OS=Homo sapiens OX=9606 GN=TCOF1 PE=1 SV=3	100	0	NP_001128715.1	treacle protein isoform d [Homo sapiens]
Q9ULK4	case1-VS-control	-1.01871	0.0945546	-10.7738	8	4.85e-06	3.24e-05	Down	Q9ULK4	Mediator of RNA polymerase II transcription subunit 23 OS=Homo sapiens OX=9606 GN=MED23 PE=1 SV=2	100	0	NP_004821.2	mediator of RNA polymerase II transcription subunit 23 isoform a [Homo sapiens]
Q9HCC0	case1-VS-control	-1.67209	0.155239	-10.7711	8	4.86e-06	3.24e-05	Down	Q9HCC0	Methylcrotonoyl-CoA carboxylase beta chain, mitochondrial OS=Homo sapiens OX=9606 GN=MCCC2 PE=1 SV=1	100	0	NP_071415.1	methylcrotonoyl-CoA carboxylase beta chain, mitochondrial [Homo sapiens]
P46013	case1-VS-control	-1.14531	0.106375	-10.7667	8	4.88e-06	3.24e-05	Down	P46013	Proliferation marker protein Ki-67 OS=Homo sapiens OX=9606 GN=MKI67 PE=1 SV=2	100	0	NP_002408.3	proliferation marker protein Ki-67 isoform 1 [Homo sapiens]
Q9P0T7	case1-VS-control	-1.7124	0.159066	-10.7654	8	4.88e-06	3.24e-05	Down	Q9P0T7	Transmembrane protein 9 OS=Homo sapiens OX=9606 GN=TMEM9 PE=1 SV=1	100	3e-134	NP_057540.1	transmembrane protein 9 isoform a precursor [Homo sapiens]
P41250	case1-VS-control	2.43189	0.225967	10.7621	8	4.89e-06	3.24e-05	Up	P41250	Glycine--tRNA ligase OS=Homo sapiens OX=9606 GN=GARS PE=1 SV=3	100	0	NP_002038.2	glycine--tRNA ligase isoform 1 precursor [Homo sapiens]
Q9NWS8	case1-VS-control	-0.793683	0.0737945	-10.7553	8	4.92e-06	3.25e-05	None	Q9NWS8	Required for meiotic nuclear division protein 1 homolog OS=Homo sapiens OX=9606 GN=RMND1 PE=1 SV=2	100	0	NP_060379.2	required for meiotic nuclear division protein 1 homolog isoform 1 [Homo sapiens]
O60701	case1-VS-control	5.37181	0.499565	10.753	8	4.92e-06	3.25e-05	Up	O60701	UDP-glucose 6-dehydrogenase OS=Homo sapiens OX=9606 GN=UGDH PE=1 SV=1	100	0	XP_005262724.1	PREDICTED: UDP-glucose 6-dehydrogenase isoform X1 [Homo sapiens]
G2XKQ0	case1-VS-control	-1.34474	0.125108	-10.7486	8	4.94e-06	3.25e-05	Down	G2XKQ0;P63165	Small ubiquitin-related modifier 5 OS=Homo sapiens OX=9606 GN=SUMO1P1 PE=1 SV=2	99.01	1e-67	ACM86836.1	Sumo13 [Homo sapiens]
Q9UFN0	case1-VS-control	-1.49991	0.139521	-10.7504	8	4.93e-06	3.25e-05	Down	Q9UFN0	Protein NipSnap homolog 3A OS=Homo sapiens OX=9606 GN=NIPSNAP3A PE=1 SV=2	100	0	NP_056284.1	protein NipSnap homolog 3A isoform 1 [Homo sapiens]
O15031	case1-VS-control	-1.51801	0.141285	-10.7443	8	4.95e-06	3.26e-05	Down	O15031	Plexin-B2 OS=Homo sapiens OX=9606 GN=PLXNB2 PE=1 SV=3	100	0	NP_036533.2	plexin-B2 precursor [Homo sapiens]
P16144	case1-VS-control	2.05955	0.191713	10.7429	8	4.96e-06	3.26e-05	Up	P16144	Integrin beta-4 OS=Homo sapiens OX=9606 GN=ITGB4 PE=1 SV=5	100	0	XP_006721930.1	PREDICTED: integrin beta-4 isoform X3 [Homo sapiens]
P42025	case1-VS-control	-1.26915	0.118272	-10.7308	8	5e-06	3.28e-05	Down	P42025	Beta-centractin OS=Homo sapiens OX=9606 GN=ACTR1B PE=1 SV=1	100	0	NP_005726.1	beta-centractin [Homo sapiens]
P54709	case1-VS-control	-1.21798	0.113527	-10.7285	8	5.01e-06	3.28e-05	Down	P54709	Sodium/potassium-transporting ATPase subunit beta-3 OS=Homo sapiens OX=9606 GN=ATP1B3 PE=1 SV=1	100	0	NP_001670.1	sodium/potassium-transporting ATPase subunit beta-3 [Homo sapiens]
Q86WB0	case1-VS-control	-2.65174	0.247303	-10.7226	8	5.03e-06	3.29e-05	Down	Q86WB0	Nuclear-interacting partner of ALK OS=Homo sapiens OX=9606 GN=ZC3HC1 PE=1 SV=1	100	0	NP_057562.3	nuclear-interacting partner of ALK isoform 1 [Homo sapiens]
Q9UBQ5	case1-VS-control	1.59147	0.148622	10.7081	8	5.08e-06	3.32e-05	Up	Q9UBQ5	Eukaryotic translation initiation factor 3 subunit K OS=Homo sapiens OX=9606 GN=EIF3K PE=1 SV=1	100	8e-164	NP_037366.1	eukaryotic translation initiation factor 3 subunit K isoform 1 [Homo sapiens]
O43615	case1-VS-control	-0.972337	0.0908725	-10.7	8	5.11e-06	3.33e-05	None	O43615	Mitochondrial import inner membrane translocase subunit TIM44 OS=Homo sapiens OX=9606 GN=TIMM44 PE=1 SV=2	100	0	NP_006342.2	mitochondrial import inner membrane translocase subunit TIM44 [Homo sapiens]
Q02252	case1-VS-control	-1.88951	0.176823	-10.6859	8	5.16e-06	3.36e-05	Down	Q02252	Methylmalonate-semialdehyde dehydrogenase [acylating], mitochondrial OS=Homo sapiens OX=9606 GN=ALDH6A1 PE=1 SV=2	100	0	NP_005580.1	methylmalonate-semialdehyde dehydrogenase [acylating], mitochondrial isoform 1 precursor [Homo sapiens]
P49419	case1-VS-control	-1.46727	0.137402	-10.6787	8	5.19e-06	3.37e-05	Down	P49419	Alpha-aminoadipic semialdehyde dehydrogenase OS=Homo sapiens OX=9606 GN=ALDH7A1 PE=1 SV=5	100	0	NP_001173.2	alpha-aminoadipic semialdehyde dehydrogenase isoform 1 precursor [Homo sapiens]
Q7Z7F7	case1-VS-control	-1.34561	0.126043	-10.6757	8	5.2e-06	3.38e-05	Down	Q7Z7F7	39S ribosomal protein L55, mitochondrial OS=Homo sapiens OX=9606 GN=MRPL55 PE=1 SV=1	100	6e-87	NP_852106.1	39S ribosomal protein L55, mitochondrial isoform a [Homo sapiens]
Q9ULX3	case1-VS-control	3.12039	0.292465	10.6693	8	5.22e-06	3.39e-05	Up	Q9ULX3	RNA-binding protein NOB1 OS=Homo sapiens OX=9606 GN=NOB1 PE=1 SV=1	100	0	NP_054781.1	RNA-binding protein NOB1 [Homo sapiens]
Q96G23	case1-VS-control	-1.52555	0.143237	-10.6505	8	5.29e-06	3.43e-05	Down	Q96G23	Ceramide synthase 2 OS=Homo sapiens OX=9606 GN=CERS2 PE=1 SV=1	100	0	NP_071358.1	ceramide synthase 2 [Homo sapiens]
Q14142	case1-VS-control	-1.99845	0.188006	-10.6298	8	5.37e-06	3.47e-05	Down	Q14142	Tripartite motif-containing protein 14 OS=Homo sapiens OX=9606 GN=TRIM14 PE=1 SV=2	100	0	NP_055603.2	tripartite motif-containing protein 14 [Homo sapiens]
O75400	case1-VS-control	-1.07995	0.101726	-10.6163	8	5.42e-06	3.5e-05	Down	O75400	Pre-mRNA-processing factor 40 homolog A OS=Homo sapiens OX=9606 GN=PRPF40A PE=1 SV=2	100	0	O75400.2	RecName: Full=Pre-mRNA-processing factor 40 homolog A; AltName: Full=Fas ligand-associated factor 1; AltName: Full=Formin-binding protein 11; AltName: Full=Formin-binding protein 3; AltName: Full=Huntingtin yeast partner A; AltName: Full=Huntingtin-interacting protein 10; Short=HIP-10; AltName: Full=Huntingtin-interacting protein A; AltName: Full=Renal carcinoma antigen NY-REN-6
P07099	case1-VS-control	-1.22483	0.115355	-10.6179	8	5.42e-06	3.5e-05	Down	P07099	Epoxide hydrolase 1 OS=Homo sapiens OX=9606 GN=EPHX1 PE=1 SV=1	100	0	NP_000111.1	epoxide hydrolase 1 [Homo sapiens]
P26368	case1-VS-control	-0.789224	0.0743549	-10.6143	8	5.43e-06	3.5e-05	None	P26368	Splicing factor U2AF 65 kDa subunit OS=Homo sapiens OX=9606 GN=U2AF2 PE=1 SV=4	99.789	0	XP_007955472.1	PREDICTED: splicing factor U2AF 65 kDa subunit isoform X1 [Orycteropus afer afer]
P14373	case1-VS-control	-2.00543	0.189083	-10.6061	8	5.46e-06	3.51e-05	Down	P14373	Zinc finger protein RFP OS=Homo sapiens OX=9606 GN=TRIM27 PE=1 SV=1	100	0	NP_006501.1	zinc finger protein RFP [Homo sapiens]
P04843	case1-VS-control	-0.813284	0.0767984	-10.5899	8	5.52e-06	3.55e-05	None	P04843	Dolichyl-diphosphooligosaccharide--protein glycosyltransferase subunit 1 OS=Homo sapiens OX=9606 GN=RPN1 PE=1 SV=1	100	0	NP_002941.1	dolichyl-diphosphooligosaccharide--protein glycosyltransferase subunit 1 precursor [Homo sapiens]
O43172	case1-VS-control	-0.957217	0.0905201	-10.5746	8	5.58e-06	3.57e-05	None	O43172	U4/U6 small nuclear ribonucleoprotein Prp4 OS=Homo sapiens OX=9606 GN=PRPF4 PE=1 SV=2	100	0	NP_004688.2	U4/U6 small nuclear ribonucleoprotein Prp4 isoform 1 [Homo sapiens]
P35268	case1-VS-control	1.22619	0.115959	10.5743	8	5.59e-06	3.57e-05	Up	P35268	60S ribosomal protein L22 OS=Homo sapiens OX=9606 GN=RPL22 PE=1 SV=2	99.219	1e-89	XP_007978994.1	PREDICTED: 60S ribosomal protein L22 isoform X2 [Chlorocebus sabaeus]
Q5BJF2	case1-VS-control	-2.16831	0.205108	-10.5716	8	5.6e-06	3.57e-05	Down	Q5BJF2	Sigma intracellular receptor 2 OS=Homo sapiens OX=9606 GN=TMEM97 PE=1 SV=1	100	7e-125	NP_055388.2	transmembrane protein 97 [Homo sapiens]
Q96S44	case1-VS-control	2.9098	0.194395	14.9685	6	5.6e-06	3.57e-05	Up	Q96S44	EKC/KEOPS complex subunit TP53RK OS=Homo sapiens OX=9606 GN=TP53RK PE=1 SV=2	100	0	NP_291028.3	TP53-regulating kinase [Homo sapiens]
Q9Y2S7	case1-VS-control	-1.43386	0.135582	-10.5756	8	5.58e-06	3.57e-05	Down	Q9Y2S7	Polymerase delta-interacting protein 2 OS=Homo sapiens OX=9606 GN=POLDIP2 PE=1 SV=1	100	0	NP_056399.1	polymerase delta-interacting protein 2 isoform 1 [Homo sapiens]
P04181	case1-VS-control	-1.44655	0.137021	-10.5571	8	5.65e-06	3.6e-05	Down	P04181	Ornithine aminotransferase, mitochondrial OS=Homo sapiens OX=9606 GN=OAT PE=1 SV=1	100	0	NP_000265.1	ornithine aminotransferase, mitochondrial isoform 1 precursor [Homo sapiens]
P30825	case1-VS-control	-1.14075	0.108115	-10.5513	8	5.68e-06	3.61e-05	Down	P30825	High affinity cationic amino acid transporter 1 OS=Homo sapiens OX=9606 GN=SLC7A1 PE=1 SV=1	100	0	NP_003036.1	high affinity cationic amino acid transporter 1 [Homo sapiens]
P56537	case1-VS-control	1.16845	0.110817	10.5439	8	5.71e-06	3.63e-05	Up	P56537	Eukaryotic translation initiation factor 6 OS=Homo sapiens OX=9606 GN=EIF6 PE=1 SV=1	100	1e-180	NP_002203.1	eukaryotic translation initiation factor 6 isoform a [Homo sapiens]
O95571	case1-VS-control	-1.77279	0.168354	-10.5301	8	5.76e-06	3.66e-05	Down	O95571	Persulfide dioxygenase ETHE1, mitochondrial OS=Homo sapiens OX=9606 GN=ETHE1 PE=1 SV=2	100	0	NP_055112.2	persulfide dioxygenase ETHE1, mitochondrial isoform 1 [Homo sapiens]
O75828	case1-VS-control	2.0394	0.137158	14.869	6	5.82e-06	3.69e-05	Up	O75828	Carbonyl reductase [NADPH] 3 OS=Homo sapiens OX=9606 GN=CBR3 PE=1 SV=3	100	0	NP_001227.1	carbonyl reductase [NADPH] 3 [Homo sapiens]
Q3ZCQ8	case1-VS-control	-1.33114	0.126666	-10.509	8	5.85e-06	3.7e-05	Down	Q3ZCQ8	Mitochondrial import inner membrane translocase subunit TIM50 OS=Homo sapiens OX=9606 GN=TIMM50 PE=1 SV=2	100	0	AAH50082.1	TIMM50 protein, partial [Homo sapiens]
Q6UB35	case1-VS-control	-0.626679	0.0596841	-10.4999	8	5.89e-06	3.72e-05	None	Q6UB35	Monofunctional C1-tetrahydrofolate synthase, mitochondrial OS=Homo sapiens OX=9606 GN=MTHFD1L PE=1 SV=1	100	0	NP_056255.2	monofunctional C1-tetrahydrofolate synthase, mitochondrial isoform 2 precursor [Homo sapiens]
Q92552	case1-VS-control	-1.22672	0.116934	-10.4908	8	5.93e-06	3.74e-05	Down	Q92552	28S ribosomal protein S27, mitochondrial OS=Homo sapiens OX=9606 GN=MRPS27 PE=1 SV=3	100	0	NP_055899.2	28S ribosomal protein S27, mitochondrial isoform 2 [Homo sapiens]
Q8IWT0	case1-VS-control	2.29244	0.218573	10.4882	8	5.94e-06	3.74e-05	Up	Q8IWT0	Protein archease OS=Homo sapiens OX=9606 GN=ZBTB8OS PE=1 SV=2	100	1e-122	NP_848642.1	protein archease isoform 1 [Homo sapiens]
Q9BZM5	case1-VS-control	-2.62534	0.177246	-14.8118	6	5.96e-06	3.75e-05	Down	Q9BZM5	UL16-binding protein 2 OS=Homo sapiens OX=9606 GN=ULBP2 PE=1 SV=1	100	0	NP_079493.1	NKG2D ligand 2 preproprotein [Homo sapiens]
Q8NFJ5	case1-VS-control	1.15774	0.110532	10.4743	8	6e-06	3.77e-05	Up	Q8NFJ5	Retinoic acid-induced protein 3 OS=Homo sapiens OX=9606 GN=GPRC5A PE=1 SV=2	100	0	NP_003970.1	retinoic acid-induced protein 3 [Homo sapiens]
Q9NU23	case1-VS-control	-3.35446	0.320381	-10.4702	8	6.02e-06	3.77e-05	Down	Q9NU23	LYR motif-containing protein 2 OS=Homo sapiens OX=9606 GN=LYRM2 PE=1 SV=1	100	2e-57	NP_065199.1	LYR motif-containing protein 2 [Homo sapiens]
O15091	case1-VS-control	-1.27579	0.122026	-10.4551	8	6.08e-06	3.81e-05	Down	O15091	Mitochondrial ribonuclease P catalytic subunit OS=Homo sapiens OX=9606 GN=KIAA0391 PE=1 SV=2	100	0	NP_055487.2	mitochondrial ribonuclease P protein 3 isoform 1 precursor [Homo sapiens]
Q14232	case1-VS-control	3.82976	0.366536	10.4485	8	6.11e-06	3.82e-05	Up	Q14232	Translation initiation factor eIF-2B subunit alpha OS=Homo sapiens OX=9606 GN=EIF2B1 PE=1 SV=1	100	0	NP_001405.1	translation initiation factor eIF-2B subunit alpha [Homo sapiens]
Q9H6R4	case1-VS-control	-1.20759	0.115861	-10.4227	8	6.23e-06	3.89e-05	Down	Q9H6R4	Nucleolar protein 6 OS=Homo sapiens OX=9606 GN=NOL6 PE=1 SV=2	100	0	NP_075068.2	nucleolar protein 6 alpha isoform [Homo sapiens]
O15405	case1-VS-control	-1.77767	0.17089	-10.4024	8	6.32e-06	3.94e-05	Down	O15405;O94842;Q96NM4	TOX high mobility group box family member 3 OS=Homo sapiens OX=9606 GN=TOX3 PE=1 SV=2	100	0	NP_001073899.2	TOX high mobility group box family member 3 isoform 1 [Homo sapiens]
Q86YS6	case1-VS-control	-2.08693	0.200718	-10.3973	8	6.34e-06	3.95e-05	Down	Q86YS6	Ras-related protein Rab-43 OS=Homo sapiens OX=9606 GN=RAB43 PE=1 SV=1	100	2e-157	NP_940892.1	ras-related protein Rab-43 isoform a [Homo sapiens]
O95302	case1-VS-control	-1.48174	0.142716	-10.3825	8	6.41e-06	3.99e-05	Down	O95302	Peptidyl-prolyl cis-trans isomerase FKBP9 OS=Homo sapiens OX=9606 GN=FKBP9 PE=1 SV=2	100	0	NP_009201.2	peptidyl-prolyl cis-trans isomerase FKBP9 isoform 1 precursor [Homo sapiens]
Q02241	case1-VS-control	-1.84412	0.177729	-10.376	8	6.44e-06	4e-05	Down	Q02241	Kinesin-like protein KIF23 OS=Homo sapiens OX=9606 GN=KIF23 PE=1 SV=3	100	0	NP_612565.1	kinesin-like protein KIF23 isoform 1 [Homo sapiens]
Q56VL3	case1-VS-control	-2.05217	0.19779	-10.3755	8	6.44e-06	4e-05	Down	Q56VL3	OCIA domain-containing protein 2 OS=Homo sapiens OX=9606 GN=OCIAD2 PE=1 SV=1	100	1e-110	NP_001014446.1	OCIA domain-containing protein 2 isoform 1 [Homo sapiens]
P55786	case1-VS-control	2.57336	0.248421	10.3589	8	6.52e-06	4.04e-05	Up	P55786	Puromycin-sensitive aminopeptidase OS=Homo sapiens OX=9606 GN=NPEPPS PE=1 SV=2	100	0	NP_006301.3	puromycin-sensitive aminopeptidase isoform 1 [Homo sapiens]
O75600	case1-VS-control	-1.66939	0.11474	-14.5494	6	6.61e-06	4.09e-05	Down	O75600	2-amino-3-ketobutyrate coenzyme A ligase, mitochondrial OS=Homo sapiens OX=9606 GN=GCAT PE=1 SV=1	100	0	NP_055106.1	2-amino-3-ketobutyrate coenzyme A ligase, mitochondrial isoform 2 precursor [Homo sapiens]
Q9NY61	case1-VS-control	-1.26242	0.122124	-10.3372	8	6.62e-06	4.09e-05	Down	Q9NY61	Protein AATF OS=Homo sapiens OX=9606 GN=AATF PE=1 SV=1	100	0	NP_036270.1	protein AATF [Homo sapiens]
Q8NI60	case1-VS-control	-1.91062	0.185193	-10.317	8	6.72e-06	4.15e-05	Down	Q8NI60	Atypical kinase COQ8A, mitochondrial OS=Homo sapiens OX=9606 GN=COQ8A PE=1 SV=1	100	0	NP_064632.2	atypical kinase COQ8A, mitochondrial [Homo sapiens]
O15397	case1-VS-control	3.38924	0.32885	10.3063	8	6.77e-06	4.17e-05	Up	O15397	Importin-8 OS=Homo sapiens OX=9606 GN=IPO8 PE=1 SV=2	100	0	NP_006381.2	importin-8 isoform 1 [Homo sapiens]
Q8N1F7	case1-VS-control	-1.35559	0.131555	-10.3044	8	6.78e-06	4.17e-05	Down	Q8N1F7	Nuclear pore complex protein Nup93 OS=Homo sapiens OX=9606 GN=NUP93 PE=1 SV=2	100	0	NP_055484.3	nuclear pore complex protein Nup93 isoform 1 [Homo sapiens]
Q13085	case1-VS-control	1.16456	0.113122	10.2947	8	6.83e-06	4.18e-05	Up	Q13085	Acetyl-CoA carboxylase 1 OS=Homo sapiens OX=9606 GN=ACACA PE=1 SV=2	100	0	NP_942133.1	acetyl-CoA carboxylase 1 isoform 2 [Homo sapiens]
Q2TAA5	case1-VS-control	-2.69274	0.226681	-11.879	7	6.81e-06	4.18e-05	Down	Q2TAA5	GDP-Man:Man(3)GlcNAc(2)-PP-Dol alpha-1,2-mannosyltransferase OS=Homo sapiens OX=9606 GN=ALG11 PE=1 SV=2	100	0	NP_001004127.2	GDP-Man:Man(3)GlcNAc(2)-PP-Dol alpha-1,2-mannosyltransferase [Homo sapiens]
Q9P2B2	case1-VS-control	-1.18047	0.114643	-10.2969	8	6.82e-06	4.18e-05	Down	Q9P2B2	Prostaglandin F2 receptor negative regulator OS=Homo sapiens OX=9606 GN=PTGFRN PE=1 SV=2	100	0	NP_065173.2	prostaglandin F2 receptor negative regulator precursor [Homo sapiens]
Q9Y3D5	case1-VS-control	-2.12652	0.20657	-10.2944	8	6.83e-06	4.18e-05	Down	Q9Y3D5	28S ribosomal protein S18c, mitochondrial OS=Homo sapiens OX=9606 GN=MRPS18C PE=1 SV=1	100	7e-103	NP_057151.1	28S ribosomal protein S18c, mitochondrial isoform 1 [Homo sapiens]
P82675	case1-VS-control	-1.80102	0.175088	-10.2864	8	6.87e-06	4.2e-05	Down	P82675	28S ribosomal protein S5, mitochondrial OS=Homo sapiens OX=9606 GN=MRPS5 PE=1 SV=2	100	0	NP_114108.1	28S ribosomal protein S5, mitochondrial isoform a [Homo sapiens]
Q5FWF5	case1-VS-control	-1.07633	0.104674	-10.2827	8	6.89e-06	4.21e-05	Down	Q5FWF5	N-acetyltransferase ESCO1 OS=Homo sapiens OX=9606 GN=ESCO1 PE=1 SV=3	100	0	NP_443143.2	N-acetyltransferase ESCO1 [Homo sapiens]
P04179	case1-VS-control	-1.84851	0.179814	-10.2801	8	6.9e-06	4.21e-05	Down	P04179	Superoxide dismutase [Mn], mitochondrial OS=Homo sapiens OX=9606 GN=SOD2 PE=1 SV=3	100	5e-166	NP_000627.2	superoxide dismutase [Mn], mitochondrial isoform A precursor [Homo sapiens]
Q99766	case1-VS-control	-1.65472	0.161025	-10.2761	8	6.92e-06	4.22e-05	Down	Q99766	ATP synthase subunit s, mitochondrial OS=Homo sapiens OX=9606 GN=ATP5S PE=1 SV=3	100	1e-159	NP_001003803.1	ATP synthase subunit s, mitochondrial isoform a precursor [Homo sapiens]
Q9H446	case1-VS-control	3.30441	0.229053	14.4264	6	6.95e-06	4.22e-05	Up	Q9H446	RWD domain-containing protein 1 OS=Homo sapiens OX=9606 GN=RWDD1 PE=1 SV=1	100	4e-174	NP_057036.2	RWD domain-containing protein 1 isoform a [Homo sapiens]
Q9UGQ3	case1-VS-control	-1.41378	0.0979863	-14.4283	6	6.94e-06	4.22e-05	Down	Q9UGQ3	Solute carrier family 2, facilitated glucose transporter member 6 OS=Homo sapiens OX=9606 GN=SLC2A6 PE=1 SV=2	100	0	NP_060055.2	solute carrier family 2, facilitated glucose transporter member 6 isoform 1 [Homo sapiens]
P54105	case1-VS-control	3.42446	0.289274	11.8381	7	6.96e-06	4.22e-05	Up	P54105	Methylosome subunit pICln OS=Homo sapiens OX=9606 GN=CLNS1A PE=1 SV=1	100	2e-173	NP_001284.1	methylosome subunit pICln isoform a [Homo sapiens]
Q15005	case1-VS-control	-1.00613	0.09809	-10.2572	8	7.02e-06	4.23e-05	Down	Q15005	Signal peptidase complex subunit 2 OS=Homo sapiens OX=9606 GN=SPCS2 PE=1 SV=3	100	3e-166	NP_055567.2	signal peptidase complex subunit 2 [Homo sapiens]
Q16540	case1-VS-control	-1.3154	0.128254	-10.2562	8	7.03e-06	4.23e-05	Down	Q16540	39S ribosomal protein L23, mitochondrial OS=Homo sapiens OX=9606 GN=MRPL23 PE=1 SV=1	100	9e-110	NP_066957.3	39S ribosomal protein L23, mitochondrial [Homo sapiens]
Q5T3F8	case1-VS-control	-1.77996	0.17343	-10.2633	8	6.99e-06	4.23e-05	Down	Q5T3F8	CSC1-like protein 2 OS=Homo sapiens OX=9606 GN=TMEM63B PE=1 SV=1	100	0	XP_003833280.1	PREDICTED: CSC1-like protein 2 isoform X1 [Pan paniscus]
Q6UXH1	case1-VS-control	-2.66141	0.259475	-10.2569	8	7.02e-06	4.23e-05	Down	Q6UXH1	Cysteine-rich with EGF-like domain protein 2 OS=Homo sapiens OX=9606 GN=CRELD2 PE=1 SV=1	100	0	NP_077300.3	cysteine-rich with EGF-like domain protein 2 isoform b precursor [Homo sapiens]
Q96HH9	case1-VS-control	1.30679	0.127377	10.2592	8	7.01e-06	4.23e-05	Up	Q96HH9	GRAM domain-containing protein 2B OS=Homo sapiens OX=9606 GN=GRAMD2B PE=1 SV=1	100	0	NP_076416.2	GRAM domain-containing protein 2B isoform 2 [Homo sapiens]
Q9Y2T2	case1-VS-control	2.22709	0.217106	10.2581	8	7.02e-06	4.23e-05	Up	Q9Y2T2	AP-3 complex subunit mu-1 OS=Homo sapiens OX=9606 GN=AP3M1 PE=1 SV=1	100	0	XP_012358393.1	PREDICTED: AP-3 complex subunit mu-1 isoform X1 [Nomascus leucogenys]
O14936	case1-VS-control	-1.87898	0.183534	-10.2377	8	7.12e-06	4.26e-05	Down	O14936	Peripheral plasma membrane protein CASK OS=Homo sapiens OX=9606 GN=CASK PE=1 SV=3	100	0	XP_004645627.1	PREDICTED: peripheral plasma membrane protein CASK isoform X1 [Octodon degus]
P28062	case1-VS-control	2.62554	0.256437	10.2385	8	7.12e-06	4.26e-05	Up	P28062	Proteasome subunit beta type-8 OS=Homo sapiens OX=9606 GN=PSMB8 PE=1 SV=3	100	0	NP_683720.2	proteasome subunit beta type-8 isoform E2 precursor [Homo sapiens]
Q5T653	case1-VS-control	-1.45148	0.141771	-10.2382	8	7.12e-06	4.26e-05	Down	Q5T653	39S ribosomal protein L2, mitochondrial OS=Homo sapiens OX=9606 GN=MRPL2 PE=1 SV=2	100	0	NP_057034.2	39S ribosomal protein L2, mitochondrial isoform 1 [Homo sapiens]
Q8NC44	case1-VS-control	-1.8768	0.18336	-10.2356	8	7.13e-06	4.26e-05	Down	Q8NC44	Reticulophagy regulator 2 OS=Homo sapiens OX=9606 GN=RETREG2 PE=1 SV=3	100	0	NP_077269.3	reticulophagy regulator 2 isoform 1 [Homo sapiens]
Q9H0H0	case1-VS-control	-1.90684	0.186279	-10.2364	8	7.13e-06	4.26e-05	Down	Q9H0H0	Integrator complex subunit 2 OS=Homo sapiens OX=9606 GN=INTS2 PE=1 SV=2	100	0	Q9H0H0.2	RecName: Full=Integrator complex subunit 2; Short=Int2
P22087	case1-VS-control	-1.05909	0.103504	-10.2323	8	7.15e-06	4.27e-05	Down	P22087	rRNA 2'-O-methyltransferase fibrillarin OS=Homo sapiens OX=9606 GN=FBL PE=1 SV=2	100	0	NP_001427.2	rRNA 2'-O-methyltransferase fibrillarin [Homo sapiens]
O14672	case1-VS-control	-1.49409	0.146312	-10.2117	8	7.26e-06	4.32e-05	Down	O14672	Disintegrin and metalloproteinase domain-containing protein 10 OS=Homo sapiens OX=9606 GN=ADAM10 PE=1 SV=1	100	0	NP_001101.1	disintegrin and metalloproteinase domain-containing protein 10 isoform 1 preproprotein [Homo sapiens]
Q9Y3D9	case1-VS-control	-1.57395	0.154108	-10.2133	8	7.25e-06	4.32e-05	Down	Q9Y3D9	28S ribosomal protein S23, mitochondrial OS=Homo sapiens OX=9606 GN=MRPS23 PE=1 SV=2	100	9e-139	NP_057154.2	28S ribosomal protein S23, mitochondrial [Homo sapiens]
Q9BT73	case1-VS-control	2.73766	0.232925	11.7534	7	7.31e-06	4.34e-05	Up	Q9BT73	Proteasome assembly chaperone 3 OS=Homo sapiens OX=9606 GN=PSMG3 PE=1 SV=1	100	2e-82	NP_115678.1	proteasome assembly chaperone 3 [Homo sapiens]
Q4KMQ2	case1-VS-control	-1.61159	0.15804	-10.1973	8	7.33e-06	4.35e-05	Down	Q4KMQ2	Anoctamin-6 OS=Homo sapiens OX=9606 GN=ANO6 PE=1 SV=2	100	0	NP_001020527.2	anoctamin-6 isoform a [Homo sapiens]
Q5SRE5	case1-VS-control	-1.42711	0.139928	-10.1989	8	7.33e-06	4.35e-05	Down	Q5SRE5	Nucleoporin NUP188 homolog OS=Homo sapiens OX=9606 GN=NUP188 PE=1 SV=1	100	0	NP_056169.1	nucleoporin NUP188 homolog [Homo sapiens]
P10809	case1-VS-control	-1.24606	0.122324	-10.1866	8	7.39e-06	4.37e-05	Down	P10809	60 kDa heat shock protein, mitochondrial OS=Homo sapiens OX=9606 GN=HSPD1 PE=1 SV=2	100	0	NP_002147.2	60 kDa heat shock protein, mitochondrial [Homo sapiens]
P35914	case1-VS-control	-1.58864	0.155966	-10.1858	8	7.4e-06	4.37e-05	Down	P35914	Hydroxymethylglutaryl-CoA lyase, mitochondrial OS=Homo sapiens OX=9606 GN=HMGCL PE=1 SV=2	100	0	NP_000182.2	hydroxymethylglutaryl-CoA lyase, mitochondrial isoform 1 precursor [Homo sapiens]
Q9BUL5	case1-VS-control	-0.695216	0.0682897	-10.1804	8	7.43e-06	4.39e-05	None	Q9BUL5	PHD finger protein 23 OS=Homo sapiens OX=9606 GN=PHF23 PE=1 SV=1	100	0	NP_077273.2	PHD finger protein 23 isoform 1 [Homo sapiens]
P51553	case1-VS-control	-2.39747	0.235616	-10.1753	8	7.45e-06	4.4e-05	Down	P51553	Isocitrate dehydrogenase [NAD] subunit gamma, mitochondrial OS=Homo sapiens OX=9606 GN=IDH3G PE=1 SV=1	100	0	NP_004126.1	isocitrate dehydrogenase [NAD] subunit gamma, mitochondrial isoform a precursor [Homo sapiens]
P52789	case1-VS-control	1.96238	0.193093	10.1629	8	7.52e-06	4.43e-05	Up	P52789	Hexokinase-2 OS=Homo sapiens OX=9606 GN=HK2 PE=1 SV=2	100	0	NP_000180.2	hexokinase-2 [Homo sapiens]
Q9BVK6	case1-VS-control	-0.907852	0.0894146	-10.1533	8	7.58e-06	4.46e-05	None	Q9BVK6	Transmembrane emp24 domain-containing protein 9 OS=Homo sapiens OX=9606 GN=TMED9 PE=1 SV=2	100	9e-175	NP_059980.2	transmembrane emp24 domain-containing protein 9 precursor [Homo sapiens]
Q9H3H3	case1-VS-control	2.66248	0.187433	14.205	6	7.61e-06	4.47e-05	Up	Q9H3H3	UPF0696 protein C11orf68 OS=Homo sapiens OX=9606 GN=C11orf68 PE=1 SV=2	100	0	NP_001129107.1	UPF0696 protein C11orf68 isoform 1 [Homo sapiens]
O14617	case1-VS-control	2.36651	0.233612	10.1301	8	7.71e-06	4.5e-05	Up	O14617	AP-3 complex subunit delta-1 OS=Homo sapiens OX=9606 GN=AP3D1 PE=1 SV=1	100	0	NP_003929.4	AP-3 complex subunit delta-1 isoform 2 [Homo sapiens]
P21953	case1-VS-control	-1.79899	0.177499	-10.1352	8	7.68e-06	4.5e-05	Down	P21953	2-oxoisovalerate dehydrogenase subunit beta, mitochondrial OS=Homo sapiens OX=9606 GN=BCKDHB PE=1 SV=2	100	0	NP_000047.1	2-oxoisovalerate dehydrogenase subunit beta, mitochondrial isoform 1 precursor [Homo sapiens]
Q01628	case1-VS-control	-1.43066	0.141152	-10.1356	8	7.68e-06	4.5e-05	Down	Q01628	Interferon-induced transmembrane protein 3 OS=Homo sapiens OX=9606 GN=IFITM3 PE=1 SV=2	100	2e-95	NP_066362.2	interferon-induced transmembrane protein 3 [Homo sapiens]
Q9BYD2	case1-VS-control	-2.35943	0.232844	-10.1331	8	7.69e-06	4.5e-05	Down	Q9BYD2	39S ribosomal protein L9, mitochondrial OS=Homo sapiens OX=9606 GN=MRPL9 PE=1 SV=2	100	0	NP_113608.1	39S ribosomal protein L9, mitochondrial isoform 1 [Homo sapiens]
Q9Y5L0	case1-VS-control	1.6218	0.160092	10.1304	8	7.7e-06	4.5e-05	Up	Q9Y5L0	Transportin-3 OS=Homo sapiens OX=9606 GN=TNPO3 PE=1 SV=3	100	0	NP_036602.1	transportin-3 isoform 1 [Homo sapiens]
O75477	case1-VS-control	-2.08361	0.206148	-10.1073	8	7.84e-06	4.57e-05	Down	O75477	Erlin-1 OS=Homo sapiens OX=9606 GN=ERLIN1 PE=1 SV=1	100	0	O75477.1	RecName: Full=Erlin-1; AltName: Full=Endoplasmic reticulum lipid raft-associated protein 1; AltName: Full=Protein KE04; AltName: Full=Stomatin-prohibitin-flotillin-HflC/K domain-containing protein 1; Short=SPFH domain-containing protein 1
O95757	case1-VS-control	3.02775	0.299635	10.1048	8	7.85e-06	4.57e-05	Up	O95757	Heat shock 70 kDa protein 4L OS=Homo sapiens OX=9606 GN=HSPA4L PE=1 SV=3	100	0	NP_055093.2	heat shock 70 kDa protein 4L isoform 1 [Homo sapiens]
P08238	case1-VS-control	1.957	0.193741	10.1011	8	7.87e-06	4.58e-05	Up	P08238	Heat shock protein HSP 90-beta OS=Homo sapiens OX=9606 GN=HSP90AB1 PE=1 SV=4	100	0	NP_031381.2	heat shock protein HSP 90-beta isoform a [Homo sapiens]
Q6XQN6	case1-VS-control	5.09223	0.504451	10.0946	8	7.91e-06	4.6e-05	Up	Q6XQN6	Nicotinate phosphoribosyltransferase OS=Homo sapiens OX=9606 GN=NAPRT PE=1 SV=2	100	0	NP_660202.3	nicotinate phosphoribosyltransferase isoform 1 [Homo sapiens]
Q92796	case1-VS-control	0.819341	0.0812543	10.0837	8	7.98e-06	4.63e-05	None	Q92796	Disks large homolog 3 OS=Homo sapiens OX=9606 GN=DLG3 PE=1 SV=2	100	0	NP_066943.2	disks large homolog 3 isoform a [Homo sapiens]
Q05397	case1-VS-control	3.27282	0.282268	11.5947	7	8e-06	4.64e-05	Up	Q05397	Focal adhesion kinase 1 OS=Homo sapiens OX=9606 GN=PTK2 PE=1 SV=2	100	0	NP_722560.1	focal adhesion kinase 1 isoform a [Homo sapiens]
Q86U42	case1-VS-control	-1.38082	0.13705	-10.0753	8	8.03e-06	4.64e-05	Down	Q86U42	Polyadenylate-binding protein 2 OS=Homo sapiens OX=9606 GN=PABPN1 PE=1 SV=3	100	0	NP_004634.1	polyadenylate-binding protein 2 [Homo sapiens]
Q9H082	case1-VS-control	-1.20102	0.119221	-10.0739	8	8.03e-06	4.64e-05	Down	Q9H082	Ras-related protein Rab-33B OS=Homo sapiens OX=9606 GN=RAB33B PE=1 SV=1	100	1e-173	NP_112586.1	ras-related protein Rab-33B [Homo sapiens]
Q6NVY1	case1-VS-control	-1.65437	0.164368	-10.065	8	8.09e-06	4.67e-05	Down	Q6NVY1	3-hydroxyisobutyryl-CoA hydrolase, mitochondrial OS=Homo sapiens OX=9606 GN=HIBCH PE=1 SV=2	100	0	NP_055177.2	3-hydroxyisobutyryl-CoA hydrolase, mitochondrial isoform 1 precursor [Homo sapiens]
P55265	case1-VS-control	-1.27334	0.126801	-10.042	8	8.23e-06	4.74e-05	Down	P55265	Double-stranded RNA-specific adenosine deaminase OS=Homo sapiens OX=9606 GN=ADAR PE=1 SV=4	100	0	P55265.4	RecName: Full=Double-stranded RNA-specific adenosine deaminase; Short=DRADA; AltName: Full=136 kDa double-stranded RNA-binding protein; Short=p136; AltName: Full=Interferon-inducible protein 4; Short=IFI-4; AltName: Full=K88DSRBP
O00116	case1-VS-control	-0.895408	0.0891963	-10.0386	8	8.25e-06	4.75e-05	None	O00116	Alkyldihydroxyacetonephosphate synthase, peroxisomal OS=Homo sapiens OX=9606 GN=AGPS PE=1 SV=1	100	0	NP_003650.1	alkyldihydroxyacetonephosphate synthase, peroxisomal precursor [Homo sapiens]
Q00796	case1-VS-control	2.04068	0.203427	10.0315	8	8.29e-06	4.76e-05	Up	Q00796	Sorbitol dehydrogenase OS=Homo sapiens OX=9606 GN=SORD PE=1 SV=4	100	0	NP_003095.2	sorbitol dehydrogenase [Homo sapiens]
Q8IXI2	case1-VS-control	-2.3648	0.235661	-10.0347	8	8.27e-06	4.76e-05	Down	Q8IXI2	Mitochondrial Rho GTPase 1 OS=Homo sapiens OX=9606 GN=RHOT1 PE=1 SV=2	100	0	NP_060777.3	mitochondrial Rho GTPase 1 isoform 3 [Homo sapiens]
Q96TA1	case1-VS-control	1.85112	0.184531	10.0315	8	8.29e-06	4.76e-05	Up	Q96TA1	Niban-like protein 1 OS=Homo sapiens OX=9606 GN=FAM129B PE=1 SV=3	100	0	NP_073744.2	niban-like protein 1 isoform 1 [Homo sapiens]
Q6NUQ1	case1-VS-control	-1.14826	0.114486	-10.0297	8	8.3e-06	4.76e-05	Down	Q6NUQ1	RAD50-interacting protein 1 OS=Homo sapiens OX=9606 GN=RINT1 PE=1 SV=1	100	0	NP_068749.3	RAD50-interacting protein 1 isoform 1 [Homo sapiens]
Q10472	case1-VS-control	1.86368	0.185935	10.0233	8	8.34e-06	4.77e-05	Up	Q10472	Polypeptide N-acetylgalactosaminyltransferase 1 OS=Homo sapiens OX=9606 GN=GALNT1 PE=1 SV=1	100	0	NP_065207.2	polypeptide N-acetylgalactosaminyltransferase 1 [Homo sapiens]
O00410	case1-VS-control	3.03418	0.303246	10.0057	8	8.45e-06	4.83e-05	Up	O00410	Importin-5 OS=Homo sapiens OX=9606 GN=IPO5 PE=1 SV=4	100	0	XP_016780471.1	PREDICTED: importin-5 isoform X1 [Pan troglodytes]
Q9Y376	case1-VS-control	1.70623	0.170626	9.99984	8	8.49e-06	4.84e-05	Up	Q9Y376	Calcium-binding protein 39 OS=Homo sapiens OX=9606 GN=CAB39 PE=1 SV=1	100	0	NP_057373.1	calcium-binding protein 39 [Homo sapiens]
P22059	case1-VS-control	1.542	0.154448	9.98394	8	8.59e-06	4.87e-05	Up	P22059	Oxysterol-binding protein 1 OS=Homo sapiens OX=9606 GN=OSBP PE=1 SV=1	100	0	NP_002547.1	oxysterol-binding protein 1 [Homo sapiens]
P51153	case1-VS-control	-0.94348	0.0944412	-9.99014	8	8.55e-06	4.87e-05	None	P51153	Ras-related protein Rab-13 OS=Homo sapiens OX=9606 GN=RAB13 PE=1 SV=1	100	1e-148	NP_002861.1	ras-related protein Rab-13 isoform 1 [Homo sapiens]
Q6P158	case1-VS-control	2.73907	0.274357	9.98358	8	8.59e-06	4.87e-05	Up	Q6P158	Putative ATP-dependent RNA helicase DHX57 OS=Homo sapiens OX=9606 GN=DHX57 PE=1 SV=2	100	0	NP_945314.1	putative ATP-dependent RNA helicase DHX57 isoform 1 [Homo sapiens]
Q9BV79	case1-VS-control	-1.51143	0.151323	-9.98809	8	8.56e-06	4.87e-05	Down	Q9BV79	Enoyl-[acyl-carrier-protein] reductase, mitochondrial OS=Homo sapiens OX=9606 GN=MECR PE=1 SV=2	100	0	NP_057095.4	enoyl-[acyl-carrier-protein] reductase, mitochondrial isoform a [Homo sapiens]
Q9Y2R5	case1-VS-control	-1.55326	0.155549	-9.98564	8	8.58e-06	4.87e-05	Down	Q9Y2R5	28S ribosomal protein S17, mitochondrial OS=Homo sapiens OX=9606 GN=MRPS17 PE=1 SV=1	100	7e-92	NP_057053.1	28S ribosomal protein S17, mitochondrial [Homo sapiens]
P51159	case1-VS-control	-1.47352	0.148136	-9.94706	8	8.83e-06	5e-05	Down	P51159	Ras-related protein Rab-27A OS=Homo sapiens OX=9606 GN=RAB27A PE=1 SV=3	100	1e-165	NP_004571.2	ras-related protein Rab-27A [Homo sapiens]
Q8NC60	case1-VS-control	-1.80765	0.181798	-9.94318	8	8.86e-06	5.01e-05	Down	Q8NC60	Nitric oxide-associated protein 1 OS=Homo sapiens OX=9606 GN=NOA1 PE=1 SV=2	100	0	NP_115689.1	nitric oxide-associated protein 1 [Homo sapiens]
P16083	case1-VS-control	2.55359	0.257056	9.934	8	8.92e-06	5.04e-05	Up	P16083	Ribosyldihydronicotinamide dehydrogenase [quinone] OS=Homo sapiens OX=9606 GN=NQO2 PE=1 SV=5	100	2e-174	NP_000895.2	ribosyldihydronicotinamide dehydrogenase [quinone] isoform 1 [Homo sapiens]
O14734	case1-VS-control	-1.71106	0.172456	-9.9217	8	9e-06	5.05e-05	Down	O14734	Acyl-coenzyme A thioesterase 8 OS=Homo sapiens OX=9606 GN=ACOT8 PE=1 SV=1	100	0	NP_005460.2	acyl-coenzyme A thioesterase 8 [Homo sapiens]
O43826	case1-VS-control	-1.62368	0.163654	-9.92141	8	9e-06	5.05e-05	Down	O43826	Glucose-6-phosphate exchanger SLC37A4 OS=Homo sapiens OX=9606 GN=SLC37A4 PE=1 SV=1	100	0	NP_001458.1	glucose-6-phosphate exchanger SLC37A4 isoform 1 [Homo sapiens]
P55795	case1-VS-control	-1.30568	0.131559	-9.92465	8	8.98e-06	5.05e-05	Down	P55795	Heterogeneous nuclear ribonucleoprotein H2 OS=Homo sapiens OX=9606 GN=HNRNPH2 PE=1 SV=1	100	0	NP_062543.1	heterogeneous nuclear ribonucleoprotein H2 [Homo sapiens]
P56199	case1-VS-control	4.71903	0.165537	28.5075	4	9.01e-06	5.05e-05	Up	P56199	Integrin alpha-1 OS=Homo sapiens OX=9606 GN=ITGA1 PE=1 SV=2	100	0	NP_852478.1	integrin alpha-1 precursor [Homo sapiens]
Q15233	case1-VS-control	-1.06455	0.107268	-9.92425	8	8.98e-06	5.05e-05	Down	Q15233	Non-POU domain-containing octamer-binding protein OS=Homo sapiens OX=9606 GN=NONO PE=1 SV=4	100	0	NP_031389.3	non-POU domain-containing octamer-binding protein isoform 1 [Homo sapiens]
Q16854	case1-VS-control	-2.44036	0.245919	-9.92344	8	8.99e-06	5.05e-05	Down	Q16854	Deoxyguanosine kinase, mitochondrial OS=Homo sapiens OX=9606 GN=DGUOK PE=1 SV=2	100	0	NP_550438.1	deoxyguanosine kinase, mitochondrial isoform a precursor [Homo sapiens]
O43837	case1-VS-control	-1.68852	0.170311	-9.91428	8	9.05e-06	5.07e-05	Down	O43837	Isocitrate dehydrogenase [NAD] subunit beta, mitochondrial OS=Homo sapiens OX=9606 GN=IDH3B PE=1 SV=2	100	0	NP_001317692.1	isocitrate dehydrogenase [NAD] subunit beta, mitochondrial isoform e precursor [Homo sapiens]
P53680	case1-VS-control	-1.32247	0.133435	-9.91093	8	9.07e-06	5.08e-05	Down	P53680	AP-2 complex subunit sigma OS=Homo sapiens OX=9606 GN=AP2S1 PE=1 SV=2	100	7e-102	XP_004479122.2	PREDICTED: AP-2 complex subunit sigma [Dasypus novemcinctus]
Q53R41	case1-VS-control	-2.92635	0.295343	-9.90832	8	9.09e-06	5.08e-05	Down	Q53R41	FAST kinase domain-containing protein 1, mitochondrial OS=Homo sapiens OX=9606 GN=FASTKD1 PE=1 SV=1	100	0	NP_078898.3	FAST kinase domain-containing protein 1, mitochondrial isoform 1 [Homo sapiens]
Q9UBW8	case1-VS-control	2.44565	0.247084	9.89805	8	9.16e-06	5.11e-05	Up	Q9UBW8	COP9 signalosome complex subunit 7a OS=Homo sapiens OX=9606 GN=COPS7A PE=1 SV=1	100	0	NP_057403.1	COP9 signalosome complex subunit 7a [Homo sapiens]
Q8WTV0	case1-VS-control	-0.636239	0.0644082	-9.87823	8	9.3e-06	5.18e-05	None	Q8WTV0	Scavenger receptor class B member 1 OS=Homo sapiens OX=9606 GN=SCARB1 PE=1 SV=1	100	0	Q8WTV0.1	RecName: Full=Scavenger receptor class B member 1; Short=SRB1; AltName: Full=CD36 and LIMPII analogous 1; Short=CLA-1; AltName: Full=CD36 antigen-like 1; AltName: Full=Collagen type I receptor, thrombospondin receptor-like 1; AltName: Full=SR-BI; AltName: CD_antigen=CD36
Q9HBL8	case1-VS-control	4.03758	0.295091	13.6825	6	9.47e-06	5.27e-05	Up	Q9HBL8	NmrA-like family domain-containing protein 1 OS=Homo sapiens OX=9606 GN=NMRAL1 PE=1 SV=1	100	0	NP_065728.1	nmrA-like family domain-containing protein 1 isoform 1 [Homo sapiens]
O94925	case1-VS-control	-1.4142	0.143703	-9.84108	8	9.57e-06	5.32e-05	Down	O94925	Glutaminase kidney isoform, mitochondrial OS=Homo sapiens OX=9606 GN=GLS PE=1 SV=1	100	0	NP_055720.3	glutaminase kidney isoform, mitochondrial isoform 1 precursor [Homo sapiens]
P26639	case1-VS-control	6.03695	0.534845	11.2873	7	9.58e-06	5.32e-05	Up	P26639	Threonine--tRNA ligase, cytoplasmic OS=Homo sapiens OX=9606 GN=TARS PE=1 SV=3	100	0	NP_689508.3	threonine--tRNA ligase, cytoplasmic isoform 1 [Homo sapiens]
O15498	case1-VS-control	1.19389	0.121578	9.81997	8	9.72e-06	5.39e-05	Up	O15498	Synaptobrevin homolog YKT6 OS=Homo sapiens OX=9606 GN=YKT6 PE=1 SV=1	100	2e-146	NP_006546.1	synaptobrevin homolog YKT6 [Homo sapiens]
O14950	case1-VS-control	-1.15736	0.117958	-9.81164	8	9.78e-06	5.42e-05	Down	O14950;P19105	Myosin regulatory light chain 12B OS=Homo sapiens OX=9606 GN=MYL12B PE=1 SV=2	100	1e-124	NP_291024.1	myosin regulatory light chain 12B [Homo sapiens]
P08133	case1-VS-control	1.09838	0.0807631	13.6	6	9.81e-06	5.43e-05	Up	P08133	Annexin A6 OS=Homo sapiens OX=9606 GN=ANXA6 PE=1 SV=3	100	0	NP_001146.2	annexin A6 isoform 1 [Homo sapiens]
Q9BYD1	case1-VS-control	-1.3719	0.139965	-9.80172	8	9.86e-06	5.45e-05	Down	Q9BYD1	39S ribosomal protein L13, mitochondrial OS=Homo sapiens OX=9606 GN=MRPL13 PE=1 SV=1	100	1e-131	NP_054797.2	39S ribosomal protein L13, mitochondrial [Homo sapiens]
Q92576	case1-VS-control	-1.82963	0.134672	-13.5858	6	9.87e-06	5.45e-05	Down	Q92576	PHD finger protein 3 OS=Homo sapiens OX=9606 GN=PHF3 PE=1 SV=3	100	0	NP_055968.1	PHD finger protein 3 isoform 1 [Homo sapiens]
Q9UKM9	case1-VS-control	-1.77321	0.180986	-9.7975	8	9.89e-06	5.45e-05	Down	Q9UKM9	RNA-binding protein Raly OS=Homo sapiens OX=9606 GN=RALY PE=1 SV=1	100	0	NP_057951.1	RNA-binding protein Raly isoform 1 [Homo sapiens]
O14662	case1-VS-control	-0.941185	0.0961147	-9.79231	8	9.93e-06	5.47e-05	None	O14662	Syntaxin-16 OS=Homo sapiens OX=9606 GN=STX16 PE=1 SV=3	100	0	NP_001001433.1	syntaxin-16 isoform a [Homo sapiens]
Q9BV38	case1-VS-control	-2.24758	0.229601	-9.7891	8	9.95e-06	5.47e-05	Down	Q9BV38	WD repeat-containing protein 18 OS=Homo sapiens OX=9606 GN=WDR18 PE=1 SV=2	100	0	NP_077005.2	WD repeat-containing protein 18 [Homo sapiens]
P04062	case1-VS-control	-1.30971	0.133963	-9.77668	8	1e-05	5.5e-05	Down	P04062	Glucosylceramidase OS=Homo sapiens OX=9606 GN=GBA PE=1 SV=3	100	0	NP_000148.2	glucosylceramidase isoform 1 precursor [Homo sapiens]
Q15811	case1-VS-control	-1.1536	0.117974	-9.77836	8	1e-05	5.5e-05	Down	Q15811	Intersectin-1 OS=Homo sapiens OX=9606 GN=ITSN1 PE=1 SV=3	100	0	NP_003015.2	intersectin-1 isoform ITSN-l [Homo sapiens]
Q96SY0	case1-VS-control	-1.15753	0.118367	-9.77911	8	1e-05	5.5e-05	Down	Q96SY0	Integrator complex subunit 14 OS=Homo sapiens OX=9606 GN=INTS14 PE=1 SV=2	100	0	XP_001174547.2	PREDICTED: von Willebrand factor A domain-containing protein 9 isoform X1 [Pan troglodytes]
Q9UQ80	case1-VS-control	1.87223	0.191484	9.77746	8	1e-05	5.5e-05	Up	Q9UQ80	Proliferation-associated protein 2G4 OS=Homo sapiens OX=9606 GN=PA2G4 PE=1 SV=3	100	0	NP_006182.2	proliferation-associated protein 2G4 [Homo sapiens]
O43818	case1-VS-control	-1.17224	0.119962	-9.77176	8	1.01e-05	5.51e-05	Down	O43818	U3 small nucleolar RNA-interacting protein 2 OS=Homo sapiens OX=9606 GN=RRP9 PE=1 SV=1	100	0	NP_004695.1	U3 small nucleolar RNA-interacting protein 2 [Homo sapiens]
P49407	case1-VS-control	1.97674	0.202378	9.76754	8	1.01e-05	5.52e-05	Up	P49407	Beta-arrestin-1 OS=Homo sapiens OX=9606 GN=ARRB1 PE=1 SV=2	100	0	NP_004032.2	beta-arrestin-1 isoform A [Homo sapiens]
Q15043	case1-VS-control	-0.958966	0.0981703	-9.7684	8	1.01e-05	5.52e-05	None	Q15043	Zinc transporter ZIP14 OS=Homo sapiens OX=9606 GN=SLC39A14 PE=1 SV=3	100	0	NP_001338586.1	zinc transporter ZIP14 isoform d [Homo sapiens]
O75381	case1-VS-control	-1.18084	0.121071	-9.75328	8	1.02e-05	5.54e-05	Down	O75381	Peroxisomal membrane protein PEX14 OS=Homo sapiens OX=9606 GN=PEX14 PE=1 SV=1	100	0	NP_004556.1	peroxisomal membrane protein PEX14 [Homo sapiens]
P13693	case1-VS-control	-0.707598	0.0725108	-9.75851	8	1.02e-05	5.54e-05	None	P13693	Translationally-controlled tumor protein OS=Homo sapiens OX=9606 GN=TPT1 PE=1 SV=1	100	2e-125	XP_011829989.1	PREDICTED: translationally-controlled tumor protein isoform X3 [Mandrillus leucophaeus]
Q02978	case1-VS-control	-1.19913	0.122947	-9.75326	8	1.02e-05	5.54e-05	Down	Q02978	Mitochondrial 2-oxoglutarate/malate carrier protein OS=Homo sapiens OX=9606 GN=SLC25A11 PE=1 SV=3	100	0	NP_003553.2	mitochondrial 2-oxoglutarate/malate carrier protein isoform 1 [Homo sapiens]
Q8WWB7	case1-VS-control	-2.22177	0.227735	-9.75594	8	1.02e-05	5.54e-05	Down	Q8WWB7	Glycosylated lysosomal membrane protein OS=Homo sapiens OX=9606 GN=GLMP PE=1 SV=1	100	0	NP_653181.1	glycosylated lysosomal membrane protein isoform 1 precursor [Homo sapiens]
Q9BY42	case1-VS-control	1.32235	0.135576	9.75351	8	1.02e-05	5.54e-05	Up	Q9BY42	Protein RTF2 homolog OS=Homo sapiens OX=9606 GN=RTFDC1 PE=1 SV=3	100	0	NP_057491.2	protein RTF2 homolog isoform b [Homo sapiens]
P60602	case1-VS-control	-1.0109	0.103683	-9.7499	8	1.03e-05	5.55e-05	Down	P60602	Reactive oxygen species modulator 1 OS=Homo sapiens OX=9606 GN=ROMO1 PE=1 SV=1	100	5e-49	EPY78288.1	hypothetical protein CB1_001108037 [Camelus ferus]
Q96LD4	case1-VS-control	4.40555	0.394804	11.1588	7	1.03e-05	5.59e-05	Up	Q96LD4	E3 ubiquitin-protein ligase TRIM47 OS=Homo sapiens OX=9606 GN=TRIM47 PE=1 SV=2	100	0	NP_258411.2	tripartite motif-containing protein 47 [Homo sapiens]
Q12797	case1-VS-control	-0.940972	0.0967033	-9.7305	8	1.04e-05	5.62e-05	None	Q12797	Aspartyl/asparaginyl beta-hydroxylase OS=Homo sapiens OX=9606 GN=ASPH PE=1 SV=3	100	0	NP_004309.2	aspartyl/asparaginyl beta-hydroxylase isoform a [Homo sapiens]
Q14137	case1-VS-control	-1.17228	0.120495	-9.72887	8	1.04e-05	5.62e-05	Down	Q14137	Ribosome biogenesis protein BOP1 OS=Homo sapiens OX=9606 GN=BOP1 PE=1 SV=2	100	0	NP_056016.1	ribosome biogenesis protein BOP1 [Homo sapiens]
Q9HAV7	case1-VS-control	-1.63246	0.167965	-9.71904	8	1.05e-05	5.66e-05	Down	Q9HAV7	GrpE protein homolog 1, mitochondrial OS=Homo sapiens OX=9606 GN=GRPEL1 PE=1 SV=2	100	2e-156	NP_079472.1	grpE protein homolog 1, mitochondrial precursor [Homo sapiens]
P11802	case1-VS-control	2.07834	0.15484	13.4225	6	1.06e-05	5.68e-05	Up	P11802	Cyclin-dependent kinase 4 OS=Homo sapiens OX=9606 GN=CDK4 PE=1 SV=2	100	0	NP_000066.1	cyclin-dependent kinase 4 [Homo sapiens]
P13804	case1-VS-control	-1.37206	0.141311	-9.70954	8	1.06e-05	5.68e-05	Down	P13804	Electron transfer flavoprotein subunit alpha, mitochondrial OS=Homo sapiens OX=9606 GN=ETFA PE=1 SV=1	100	0	NP_000117.1	electron transfer flavoprotein subunit alpha, mitochondrial isoform a [Homo sapiens]
P59998	case1-VS-control	0.98374	0.101327	9.70861	8	1.06e-05	5.68e-05	None	P59998	Actin-related protein 2/3 complex subunit 4 OS=Homo sapiens OX=9606 GN=ARPC4 PE=1 SV=3	100	1e-119	NP_005709.1	actin-related protein 2/3 complex subunit 4 isoform a [Homo sapiens]
Q8IX12	case1-VS-control	-0.934266	0.0962063	-9.71107	8	1.06e-05	5.68e-05	None	Q8IX12	Cell division cycle and apoptosis regulator protein 1 OS=Homo sapiens OX=9606 GN=CCAR1 PE=1 SV=2	100	0	NP_060707.2	cell division cycle and apoptosis regulator protein 1 isoform a [Homo sapiens]
Q9BVJ6	case1-VS-control	-1.10482	0.113757	-9.7121	8	1.06e-05	5.68e-05	Down	Q9BVJ6	U3 small nucleolar RNA-associated protein 14 homolog A OS=Homo sapiens OX=9606 GN=UTP14A PE=1 SV=1	100	0	NP_006640.2	U3 small nucleolar RNA-associated protein 14 homolog A isoform 1 [Homo sapiens]
Q10713	case1-VS-control	-1.20037	0.123738	-9.70087	8	1.06e-05	5.7e-05	Down	Q10713	Mitochondrial-processing peptidase subunit alpha OS=Homo sapiens OX=9606 GN=PMPCA PE=1 SV=2	100	0	BAA09472.2	KIAA0123, partial [Homo sapiens]
P21399	case1-VS-control	4.10005	0.422768	9.69809	8	1.07e-05	5.7e-05	Up	P21399	Cytoplasmic aconitate hydratase OS=Homo sapiens OX=9606 GN=ACO1 PE=1 SV=3	100	0	NP_002188.1	cytoplasmic aconitate hydratase [Homo sapiens]
Q9Y3A4	case1-VS-control	-1.27548	0.131547	-9.69601	8	1.07e-05	5.7e-05	Down	Q9Y3A4	Ribosomal RNA-processing protein 7 homolog A OS=Homo sapiens OX=9606 GN=RRP7A PE=1 SV=2	100	0	NP_056518.2	ribosomal RNA-processing protein 7 homolog A [Homo sapiens]
P53597	case1-VS-control	-1.08557	0.11203	-9.68999	8	1.07e-05	5.72e-05	Down	P53597	Succinate--CoA ligase [ADP/GDP-forming] subunit alpha, mitochondrial OS=Homo sapiens OX=9606 GN=SUCLG1 PE=1 SV=4	100	0	NP_003840.2	succinate--CoA ligase [ADP/GDP-forming] subunit alpha, mitochondrial precursor [Homo sapiens]
Q5JTZ9	case1-VS-control	-1.27031	0.131165	-9.68486	8	1.08e-05	5.74e-05	Down	Q5JTZ9	Alanine--tRNA ligase, mitochondrial OS=Homo sapiens OX=9606 GN=AARS2 PE=1 SV=1	100	0	Q5JTZ9.1	RecName: Full=Alanine--tRNA ligase, mitochondrial; AltName: Full=Alanyl-tRNA synthetase; Short=AlaRS; Flags: Precursor
Q96CU9	case1-VS-control	-2.01138	0.207695	-9.68429	8	1.08e-05	5.74e-05	Down	Q96CU9	FAD-dependent oxidoreductase domain-containing protein 1 OS=Homo sapiens OX=9606 GN=FOXRED1 PE=1 SV=2	100	0	NP_060017.1	FAD-dependent oxidoreductase domain-containing protein 1 [Homo sapiens]
Q12846	case1-VS-control	-0.887865	0.0917111	-9.68111	8	1.08e-05	5.74e-05	None	Q12846	Syntaxin-4 OS=Homo sapiens OX=9606 GN=STX4 PE=1 SV=2	100	0	NP_004595.2	syntaxin-4 isoform 3 [Homo sapiens]
Q8IYI6	case1-VS-control	-1.28686	0.13298	-9.67708	8	1.08e-05	5.75e-05	Down	Q8IYI6	Exocyst complex component 8 OS=Homo sapiens OX=9606 GN=EXOC8 PE=1 SV=2	100	0	NP_787072.2	exocyst complex component 8 [Homo sapiens]
P55084	case1-VS-control	-1.07284	0.110982	-9.66675	8	1.09e-05	5.79e-05	Down	P55084	Trifunctional enzyme subunit beta, mitochondrial OS=Homo sapiens OX=9606 GN=HADHB PE=1 SV=3	100	0	NP_000174.1	trifunctional enzyme subunit beta, mitochondrial isoform 1 precursor [Homo sapiens]
Q6UWP7	case1-VS-control	-1.64164	0.169842	-9.66566	8	1.09e-05	5.79e-05	Down	Q6UWP7	Lysocardiolipin acyltransferase 1 OS=Homo sapiens OX=9606 GN=LCLAT1 PE=1 SV=1	100	0	NP_872357.2	lysocardiolipin acyltransferase 1 isoform 1 [Homo sapiens]
Q969X6	case1-VS-control	-1.56599	0.162098	-9.66078	8	1.1e-05	5.8e-05	Down	Q969X6	U3 small nucleolar RNA-associated protein 4 homolog OS=Homo sapiens OX=9606 GN=UTP4 PE=1 SV=1	100	0	NP_116219.2	U3 small nucleolar RNA-associated protein 4 homolog isoform 1 [Homo sapiens]
Q9HCS7	case1-VS-control	-0.730672	0.0756396	-9.65991	8	1.1e-05	5.8e-05	None	Q9HCS7	Pre-mRNA-splicing factor SYF1 OS=Homo sapiens OX=9606 GN=XAB2 PE=1 SV=2	100	0	NP_064581.2	pre-mRNA-splicing factor SYF1 [Homo sapiens]
Q9BVL2	case1-VS-control	-1.77134	0.183645	-9.64544	8	1.11e-05	5.86e-05	Down	Q9BVL2	Nucleoporin p58/p45 OS=Homo sapiens OX=9606 GN=NUP58 PE=1 SV=1	100	0	NP_054808.1	nucleoporin p58/p45 isoform a [Homo sapiens]
O15382	case1-VS-control	-1.97344	0.204632	-9.64386	8	1.11e-05	5.86e-05	Down	O15382	Branched-chain-amino-acid aminotransferase, mitochondrial OS=Homo sapiens OX=9606 GN=BCAT2 PE=1 SV=2	100	0	NP_001181.2	branched-chain-amino-acid aminotransferase, mitochondrial isoform a precursor [Homo sapiens]
Q9UKF6	case1-VS-control	-1.49844	0.155503	-9.63611	8	1.12e-05	5.89e-05	Down	Q9UKF6	Cleavage and polyadenylation specificity factor subunit 3 OS=Homo sapiens OX=9606 GN=CPSF3 PE=1 SV=1	100	0	NP_057291.1	cleavage and polyadenylation specificity factor subunit 3 isoform a [Homo sapiens]
Q8NE01	case1-VS-control	-0.870203	0.0903264	-9.63398	8	1.12e-05	5.89e-05	None	Q8NE01	Metal transporter CNNM3 OS=Homo sapiens OX=9606 GN=CNNM3 PE=1 SV=1	100	0	NP_060093.3	metal transporter CNNM3 isoform 1 precursor [Homo sapiens]
Q9Y3D3	case1-VS-control	-1.13023	0.117465	-9.62188	8	1.13e-05	5.94e-05	Down	Q9Y3D3	28S ribosomal protein S16, mitochondrial OS=Homo sapiens OX=9606 GN=MRPS16 PE=1 SV=1	100	4e-98	NP_057149.1	28S ribosomal protein S16, mitochondrial [Homo sapiens]
Q86VU5	case1-VS-control	1.50457	0.156429	9.61825	8	1.13e-05	5.95e-05	Up	Q86VU5	Catechol O-methyltransferase domain-containing protein 1 OS=Homo sapiens OX=9606 GN=COMTD1 PE=1 SV=1	100	0	NP_653190.2	catechol O-methyltransferase domain-containing protein 1 [Homo sapiens]
Q9H0R3	case1-VS-control	-1.67297	0.173953	-9.61735	8	1.13e-05	5.95e-05	Down	Q9H0R3	Transmembrane protein 222 OS=Homo sapiens OX=9606 GN=TMEM222 PE=1 SV=2	100	2e-155	NP_115501.2	transmembrane protein 222 [Homo sapiens]
Q8N8A2	case1-VS-control	4.11943	0.0711827	57.8712	3	1.14e-05	5.95e-05	Up	Q8N8A2	Serine/threonine-protein phosphatase 6 regulatory ankyrin repeat subunit B OS=Homo sapiens OX=9606 GN=ANKRD44 PE=1 SV=3	100	0	NP_001182073.1	serine/threonine-protein phosphatase 6 regulatory ankyrin repeat subunit B isoform A [Homo sapiens]
Q9UNF1	case1-VS-control	3.39663	0.353357	9.61247	8	1.14e-05	5.96e-05	Up	Q9UNF1	Melanoma-associated antigen D2 OS=Homo sapiens OX=9606 GN=MAGED2 PE=1 SV=2	100	0	NP_055414.2	melanoma-associated antigen D2 [Homo sapiens]
Q12849	case1-VS-control	-0.976665	0.101637	-9.60935	8	1.14e-05	5.97e-05	None	Q12849	G-rich sequence factor 1 OS=Homo sapiens OX=9606 GN=GRSF1 PE=1 SV=3	100	0	Q12849.3	RecName: Full=G-rich sequence factor 1; Short=GRSF-1; Flags: Precursor
Q9BW19	case1-VS-control	-1.40755	0.146635	-9.599	8	1.15e-05	6.01e-05	Down	Q9BW19	Kinesin-like protein KIFC1 OS=Homo sapiens OX=9606 GN=KIFC1 PE=1 SV=2	100	0	AAH63567.1	Kinesin family member C1, partial [Homo sapiens]
Q9UHI6	case1-VS-control	1.25053	0.130442	9.58685	8	1.16e-05	6.06e-05	Up	Q9UHI6	Probable ATP-dependent RNA helicase DDX20 OS=Homo sapiens OX=9606 GN=DDX20 PE=1 SV=2	100	0	NP_009135.4	probable ATP-dependent RNA helicase DDX20 [Homo sapiens]
Q9H1K1	case1-VS-control	-0.939936	0.0981976	-9.57188	8	1.18e-05	6.12e-05	None	Q9H1K1	Iron-sulfur cluster assembly enzyme ISCU, mitochondrial OS=Homo sapiens OX=9606 GN=ISCU PE=1 SV=2	100	7e-119	NP_998760.1	iron-sulfur cluster assembly enzyme ISCU, mitochondrial isoform 2 precursor [Homo sapiens]
O75439	case1-VS-control	-1.37543	0.143776	-9.56651	8	1.18e-05	6.14e-05	Down	O75439	Mitochondrial-processing peptidase subunit beta OS=Homo sapiens OX=9606 GN=PMPCB PE=1 SV=2	100	0	NP_004270.2	mitochondrial-processing peptidase subunit beta precursor [Homo sapiens]
Q9H3R2	case1-VS-control	5.23853	0.397775	13.1696	6	1.18e-05	6.15e-05	Up	Q9H3R2	Mucin-13 OS=Homo sapiens OX=9606 GN=MUC13 PE=1 SV=3	100	0	NP_149038.3	mucin-13 precursor [Homo sapiens]
Q86YH6	case1-VS-control	-1.67313	0.175115	-9.55444	8	1.19e-05	6.18e-05	Down	Q86YH6	Decaprenyl-diphosphate synthase subunit 2 OS=Homo sapiens OX=9606 GN=PDSS2 PE=1 SV=2	100	0	NP_065114.3	decaprenyl-diphosphate synthase subunit 2 [Homo sapiens]
Q08334	case1-VS-control	-2.71136	0.157054	-17.264	5	1.19e-05	6.19e-05	Down	Q08334	Interleukin-10 receptor subunit beta OS=Homo sapiens OX=9606 GN=IL10RB PE=1 SV=2	100	0	NP_000619.3	interleukin-10 receptor subunit beta precursor [Homo sapiens]
Q99933	case1-VS-control	3.1145	0.180524	17.2526	5	1.2e-05	6.2e-05	Up	Q99933	BAG family molecular chaperone regulator 1 OS=Homo sapiens OX=9606 GN=BAG1 PE=1 SV=4	100	0	Q99933.4	RecName: Full=BAG family molecular chaperone regulator 1; Short=BAG-1; AltName: Full=Bcl-2-associated athanogene 1
P62495	case1-VS-control	1.75034	0.183466	9.54039	8	1.2e-05	6.23e-05	Up	P62495	Eukaryotic peptide chain release factor subunit 1 OS=Homo sapiens OX=9606 GN=ETF1 PE=1 SV=3	99.771	0	XP_003215303.2	PREDICTED: eukaryotic peptide chain release factor subunit 1 [Anolis carolinensis]
P13645	case1-VS-control	-3.2913	0.345298	-9.53176	8	1.21e-05	6.26e-05	Down	P13645	Keratin, type I cytoskeletal 10 OS=Homo sapiens OX=9606 GN=KRT10 PE=1 SV=6	100	0	P13645.6	RecName: Full=Keratin, type I cytoskeletal 10; AltName: Full=Cytokeratin-10; Short=CK-10; AltName: Full=Keratin-10; Short=K10
Q969M3	case1-VS-control	-1.10284	0.11576	-9.52694	8	1.22e-05	6.28e-05	Down	Q969M3	Protein YIPF5 OS=Homo sapiens OX=9606 GN=YIPF5 PE=1 SV=1	100	0	NP_110426.4	protein YIPF5 isoform a [Homo sapiens]
O60784	case1-VS-control	1.93184	0.177541	10.8811	7	1.22e-05	6.29e-05	Up	O60784	Target of Myb protein 1 OS=Homo sapiens OX=9606 GN=TOM1 PE=1 SV=2	100	0	NP_005479.1	target of Myb protein 1 isoform 1 [Homo sapiens]
Q9H2W6	case1-VS-control	-0.74881	0.0786479	-9.52104	8	1.22e-05	6.29e-05	None	Q9H2W6	39S ribosomal protein L46, mitochondrial OS=Homo sapiens OX=9606 GN=MRPL46 PE=1 SV=1	100	0	NP_071446.2	39S ribosomal protein L46, mitochondrial [Homo sapiens]
Q9UBU6	case1-VS-control	-1.11833	0.117524	-9.5157	8	1.23e-05	6.31e-05	Down	Q9UBU6	Protein FAM8A1 OS=Homo sapiens OX=9606 GN=FAM8A1 PE=1 SV=1	100	0	NP_057339.1	protein FAM8A1 [Homo sapiens]
Q8WW59	case1-VS-control	-1.77937	0.187062	-9.51219	8	1.23e-05	6.32e-05	Down	Q8WW59	SPRY domain-containing protein 4 OS=Homo sapiens OX=9606 GN=SPRYD4 PE=1 SV=2	100	2e-150	Q8WW59.2	RecName: Full=SPRY domain-containing protein 4
Q9NW13	case1-VS-control	-0.972697	0.102272	-9.51089	8	1.23e-05	6.32e-05	None	Q9NW13	RNA-binding protein 28 OS=Homo sapiens OX=9606 GN=RBM28 PE=1 SV=3	100	0	NP_060547.2	RNA-binding protein 28 isoform 1 [Homo sapiens]
Q9UHD8	case1-VS-control	-1.27891	0.134547	-9.50528	8	1.24e-05	6.34e-05	Down	Q9UHD8	Septin-9 OS=Homo sapiens OX=9606 GN=SEPT9 PE=1 SV=2	100	0	NP_001106963.1	septin-9 isoform a [Homo sapiens]
P53634	case1-VS-control	-1.65264	0.174188	-9.48771	8	1.26e-05	6.41e-05	Down	P53634	Dipeptidyl peptidase 1 OS=Homo sapiens OX=9606 GN=CTSC PE=1 SV=2	100	0	P53634.2	RecName: Full=Dipeptidyl peptidase 1; AltName: Full=Cathepsin C; AltName: Full=Cathepsin J; AltName: Full=Dipeptidyl peptidase I; Short=DPP-I; Short=DPPI; AltName: Full=Dipeptidyl transferase; Contains: RecName: Full=Dipeptidyl peptidase 1 exclusion domain chain; AltName: Full=Dipeptidyl peptidase I exclusion domain chain; Contains: RecName: Full=Dipeptidyl peptidase 1 heavy chain; AltName: Full=…
P63172	case1-VS-control	-1.3761	0.14502	-9.48903	8	1.25e-05	6.41e-05	Down	P63172	Dynein light chain Tctex-type 1 OS=Homo sapiens OX=9606 GN=DYNLT1 PE=1 SV=1	100	2e-79	NP_006510.1	dynein light chain Tctex-type 1 isoform 1 [Homo sapiens]
Q9Y2W2	case1-VS-control	0.941944	0.0992867	9.48711	8	1.26e-05	6.41e-05	None	Q9Y2W2	WW domain-binding protein 11 OS=Homo sapiens OX=9606 GN=WBP11 PE=1 SV=1	100	0	NP_057396.1	WW domain-binding protein 11 [Homo sapiens]
P02538	case1-VS-control	-1.10502	0.116502	-9.48496	8	1.26e-05	6.42e-05	Down	P02538;P04259;P48668	Keratin, type II cytoskeletal 6A OS=Homo sapiens OX=9606 GN=KRT6A PE=1 SV=3	100	0	NP_005545.1	keratin, type II cytoskeletal 6C [Homo sapiens]
Q13084	case1-VS-control	-1.36464	0.14416	-9.46617	8	1.28e-05	6.5e-05	Down	Q13084	39S ribosomal protein L28, mitochondrial OS=Homo sapiens OX=9606 GN=MRPL28 PE=1 SV=4	100	0	NP_006419.2	39S ribosomal protein L28, mitochondrial [Homo sapiens]
Q9GZM8	case1-VS-control	-1.36049	0.14406	-9.44395	8	1.3e-05	6.61e-05	Down	Q9GZM8;Q9NXR1	Nuclear distribution protein nudE-like 1 OS=Homo sapiens OX=9606 GN=NDEL1 PE=1 SV=1	100	0	NP_110435.1	nuclear distribution protein nudE-like 1 isoform B [Homo sapiens]
Q9NRG0	case1-VS-control	0.89468	0.0948305	9.43452	8	1.31e-05	6.65e-05	None	Q9NRG0	Chromatin accessibility complex protein 1 OS=Homo sapiens OX=9606 GN=CHRAC1 PE=1 SV=1	100	8e-92	NP_059140.1	chromatin accessibility complex protein 1 [Homo sapiens]
P31937	case1-VS-control	-1.53176	0.162447	-9.42932	8	1.31e-05	6.67e-05	Down	P31937	3-hydroxyisobutyrate dehydrogenase, mitochondrial OS=Homo sapiens OX=9606 GN=HIBADH PE=1 SV=2	100	0	NP_689953.1	3-hydroxyisobutyrate dehydrogenase, mitochondrial precursor [Homo sapiens]
P22234	case1-VS-control	1.86237	0.19755	9.42734	8	1.32e-05	6.68e-05	Up	P22234	Multifunctional protein ADE2 OS=Homo sapiens OX=9606 GN=PAICS PE=1 SV=3	100	0	NP_006443.1	multifunctional protein ADE2 isoform 2 [Homo sapiens]
P52701	case1-VS-control	1.8294	0.194236	9.41845	8	1.33e-05	6.71e-05	Up	P52701	DNA mismatch repair protein Msh6 OS=Homo sapiens OX=9606 GN=MSH6 PE=1 SV=2	100	0	NP_000170.1	DNA mismatch repair protein Msh6 isoform 1 [Homo sapiens]
P05787	case1-VS-control	-1.10152	0.117001	-9.41454	8	1.33e-05	6.73e-05	Down	P05787	Keratin, type II cytoskeletal 8 OS=Homo sapiens OX=9606 GN=KRT8 PE=1 SV=7	100	0	NP_002264.1	keratin, type II cytoskeletal 8 isoform 2 [Homo sapiens]
Q9NP58	case1-VS-control	-0.568379	0.0603797	-9.41341	8	1.33e-05	6.73e-05	None	Q9NP58	ATP-binding cassette sub-family B member 6, mitochondrial OS=Homo sapiens OX=9606 GN=ABCB6 PE=1 SV=1	100	0	NP_005680.1	ATP-binding cassette sub-family B member 6, mitochondrial isoform 1 [Homo sapiens]
Q8NI27	case1-VS-control	-0.940683	0.100016	-9.40535	8	1.34e-05	6.76e-05	None	Q8NI27	THO complex subunit 2 OS=Homo sapiens OX=9606 GN=THOC2 PE=1 SV=2	100	0	NP_001075019.1	THO complex subunit 2 [Homo sapiens]
O43464	case1-VS-control	-1.33918	0.142439	-9.40178	8	1.34e-05	6.77e-05	Down	O43464	Serine protease HTRA2, mitochondrial OS=Homo sapiens OX=9606 GN=HTRA2 PE=1 SV=2	100	0	NP_037379.1	serine protease HTRA2, mitochondrial isoform 1 preproprotein [Homo sapiens]
P61421	case1-VS-control	-1.13518	0.120864	-9.3922	8	1.35e-05	6.81e-05	Down	P61421	V-type proton ATPase subunit d 1 OS=Homo sapiens OX=9606 GN=ATP6V0D1 PE=1 SV=1	100	0	NP_004682.2	V-type proton ATPase subunit d 1 [Homo sapiens]
Q99747	case1-VS-control	-2.76707	0.294623	-9.39191	8	1.35e-05	6.81e-05	Down	Q99747	Gamma-soluble NSF attachment protein OS=Homo sapiens OX=9606 GN=NAPG PE=1 SV=1	100	0	NP_003817.1	gamma-soluble NSF attachment protein [Homo sapiens]
Q9H6V9	case1-VS-control	-2.77179	0.295201	-9.3895	8	1.36e-05	6.82e-05	Down	Q9H6V9	Lipid droplet-associated hydrolase OS=Homo sapiens OX=9606 GN=LDAH PE=1 SV=1	100	0	NP_068744.1	lipid droplet-associated hydrolase isoform a [Homo sapiens]
Q96GK7	case1-VS-control	-0.82913	0.0883253	-9.38723	8	1.36e-05	6.82e-05	None	Q96GK7	Fumarylacetoacetate hydrolase domain-containing protein 2A OS=Homo sapiens OX=9606 GN=FAHD2A PE=1 SV=1	100	0	NP_057128.2	fumarylacetoacetate hydrolase domain-containing protein 2A [Homo sapiens]
Q9H2P0	case1-VS-control	-1.68624	0.179799	-9.37848	8	1.37e-05	6.86e-05	Down	Q9H2P0	Activity-dependent neuroprotector homeobox protein OS=Homo sapiens OX=9606 GN=ADNP PE=1 SV=1	100	0	XP_011527050.1	PREDICTED: activity-dependent neuroprotector homeobox protein isoform X1 [Homo sapiens]
P18124	case1-VS-control	1.12225	0.119698	9.37569	8	1.37e-05	6.87e-05	Up	P18124	60S ribosomal protein L7 OS=Homo sapiens OX=9606 GN=RPL7 PE=1 SV=1	100	8e-180	NP_000962.2	60S ribosomal protein L7 [Homo sapiens]
P02042	case1-VS-control	-2.44589	0.261447	-9.35519	8	1.39e-05	6.97e-05	Down	P02042;P02100;P68871;P69891;P69892	Hemoglobin subunit delta OS=Homo sapiens OX=9606 GN=HBD PE=1 SV=2	100	2e-105	NP_000510.1	hemoglobin subunit delta [Homo sapiens]
P52758	case1-VS-control	-1.85291	0.198317	-9.34314	8	1.41e-05	7.03e-05	Down	P52758	2-iminobutanoate/2-iminopropanoate deaminase OS=Homo sapiens OX=9606 GN=RIDA PE=1 SV=1	100	2e-95	NP_005827.1	2-iminobutanoate/2-iminopropanoate deaminase [Homo sapiens]
O15511	case1-VS-control	1.02683	0.10994	9.33989	8	1.41e-05	7.04e-05	Up	O15511	Actin-related protein 2/3 complex subunit 5 OS=Homo sapiens OX=9606 GN=ARPC5 PE=1 SV=3	100	2e-107	NP_005708.1	actin-related protein 2/3 complex subunit 5 isoform 1 [Homo sapiens]
P51003	case1-VS-control	-0.849678	0.0909924	-9.33791	8	1.41e-05	7.05e-05	None	P51003	Poly(A) polymerase alpha OS=Homo sapiens OX=9606 GN=PAPOLA PE=1 SV=4	100	0	NP_116021.2	poly(A) polymerase alpha isoform 1 [Homo sapiens]
P05783	case1-VS-control	-0.859869	0.0921161	-9.33462	8	1.42e-05	7.05e-05	None	P05783	Keratin, type I cytoskeletal 18 OS=Homo sapiens OX=9606 GN=KRT18 PE=1 SV=2	100	0	NP_000215.1	keratin, type I cytoskeletal 18 [Homo sapiens]
Q9NXG2	case1-VS-control	2.42162	0.259424	9.33458	8	1.42e-05	7.05e-05	Up	Q9NXG2	THUMP domain-containing protein 1 OS=Homo sapiens OX=9606 GN=THUMPD1 PE=1 SV=2	100	0	NP_060206.2	THUMP domain-containing protein 1 [Homo sapiens]
Q99640	case1-VS-control	-1.59735	0.171225	-9.32896	8	1.42e-05	7.06e-05	Down	Q99640	Membrane-associated tyrosine- and threonine-specific cdc2-inhibitory kinase OS=Homo sapiens OX=9606 GN=PKMYT1 PE=1 SV=1	100	0	NP_004194.3	membrane-associated tyrosine- and threonine-specific cdc2-inhibitory kinase isoform 1 [Homo sapiens]
Q9Y676	case1-VS-control	-1.44961	0.155375	-9.32976	8	1.42e-05	7.06e-05	Down	Q9Y676	28S ribosomal protein S18b, mitochondrial OS=Homo sapiens OX=9606 GN=MRPS18B PE=1 SV=1	100	0	NP_054765.1	28S ribosomal protein S18b, mitochondrial [Homo sapiens]
P09104	case1-VS-control	2.49141	0.195439	12.7478	6	1.43e-05	7.1e-05	Up	P09104	Gamma-enolase OS=Homo sapiens OX=9606 GN=ENO2 PE=1 SV=3	100	0	NP_001966.1	gamma-enolase [Homo sapiens]
Q12894	case1-VS-control	3.36325	0.360854	9.32026	8	1.43e-05	7.1e-05	Up	Q12894	Interferon-related developmental regulator 2 OS=Homo sapiens OX=9606 GN=IFRD2 PE=1 SV=3	100	0	NP_006755.4	interferon-related developmental regulator 2 [Homo sapiens]
L0R6Q1	case1-VS-control	-1.67529	0.179775	-9.3188	8	1.43e-05	7.1e-05	Down	L0R6Q1	SLC35A4 upstream open reading frame protein OS=Homo sapiens OX=9606 GN=SLC35A4 PE=3 SV=1	100	2e-68	L0R6Q1.1	RecName: Full=SLC35A4 upstream open reading frame protein
Q9H074	case1-VS-control	3.05494	0.327917	9.31619	8	1.44e-05	7.11e-05	Up	Q9H074	Polyadenylate-binding protein-interacting protein 1 OS=Homo sapiens OX=9606 GN=PAIP1 PE=1 SV=1	100	0	NP_006442.2	polyadenylate-binding protein-interacting protein 1 isoform 1 [Homo sapiens]
Q9H501	case1-VS-control	-0.962369	0.103325	-9.31401	8	1.44e-05	7.11e-05	None	Q9H501	ESF1 homolog OS=Homo sapiens OX=9606 GN=ESF1 PE=1 SV=1	100	0	NP_057733.2	ESF1 homolog [Homo sapiens]
Q92621	case1-VS-control	-1.39385	0.149962	-9.29465	8	1.46e-05	7.21e-05	Down	Q92621	Nuclear pore complex protein Nup205 OS=Homo sapiens OX=9606 GN=NUP205 PE=1 SV=3	100	0	Q92621.3	RecName: Full=Nuclear pore complex protein Nup205; AltName: Full=205 kDa nucleoporin; AltName: Full=Nucleoporin Nup205
P82664	case1-VS-control	-1.1979	0.129	-9.28608	8	1.47e-05	7.25e-05	Down	P82664	28S ribosomal protein S10, mitochondrial OS=Homo sapiens OX=9606 GN=MRPS10 PE=1 SV=2	100	1e-148	NP_060611.2	28S ribosomal protein S10, mitochondrial [Homo sapiens]
O43402	case1-VS-control	-0.843587	0.0908816	-9.28227	8	1.48e-05	7.27e-05	None	O43402	ER membrane protein complex subunit 8 OS=Homo sapiens OX=9606 GN=EMC8 PE=1 SV=1	100	6e-158	NP_006058.1	ER membrane protein complex subunit 8 isoform 1 [Homo sapiens]
A0A0B4J2D5	case1-VS-control	-2.23493	0.240857	-9.27909	8	1.48e-05	7.28e-05	Down	A0A0B4J2D5;P0DPI2	Glutamine amidotransferase-like class 1 domain-containing protein 3B, mitochondrial OS=Homo sapiens OX=9606 GN=GATD3B PE=1 SV=1	100	0	XP_006723964.1	PREDICTED: ES1 protein homolog, mitochondrial isoform X2 [Homo sapiens]
Q13206	case1-VS-control	-1.26443	0.13649	-9.26385	8	1.5e-05	7.36e-05	Down	Q13206	Probable ATP-dependent RNA helicase DDX10 OS=Homo sapiens OX=9606 GN=DDX10 PE=1 SV=2	100	0	NP_004389.2	probable ATP-dependent RNA helicase DDX10 [Homo sapiens]
Q8WVQ1	case1-VS-control	-1.75911	0.189956	-9.26063	8	1.5e-05	7.37e-05	Down	Q8WVQ1	Soluble calcium-activated nucleotidase 1 OS=Homo sapiens OX=9606 GN=CANT1 PE=1 SV=1	100	0	NP_620148.1	soluble calcium-activated nucleotidase 1 [Homo sapiens]
Q08379	case1-VS-control	-1.06647	0.115196	-9.25789	8	1.5e-05	7.38e-05	Down	Q08379	Golgin subfamily A member 2 OS=Homo sapiens OX=9606 GN=GOLGA2 PE=1 SV=3	100	0	NP_004477.3	golgin subfamily A member 2 [Homo sapiens]
Q9UHD9	case1-VS-control	1.55438	0.16793	9.25611	8	1.51e-05	7.38e-05	Up	Q9UHD9	Ubiquilin-2 OS=Homo sapiens OX=9606 GN=UBQLN2 PE=1 SV=2	100	0	NP_038472.2	ubiquilin-2 [Homo sapiens]
Q9HC21	case1-VS-control	1.03326	0.11167	9.25278	8	1.51e-05	7.39e-05	Up	Q9HC21	Mitochondrial thiamine pyrophosphate carrier OS=Homo sapiens OX=9606 GN=SLC25A19 PE=1 SV=1	100	0	NP_068380.3	mitochondrial thiamine pyrophosphate carrier [Homo sapiens]
Q12792	case1-VS-control	2.92963	0.31701	9.24146	8	1.52e-05	7.45e-05	Up	Q12792	Twinfilin-1 OS=Homo sapiens OX=9606 GN=TWF1 PE=1 SV=3	100	0	NP_002813.3	twinfilin-1 isoform 2 [Homo sapiens]
P41743	case1-VS-control	2.29288	0.248157	9.23966	8	1.53e-05	7.45e-05	Up	P41743	Protein kinase C iota type OS=Homo sapiens OX=9606 GN=PRKCI PE=1 SV=2	100	0	NP_002731.4	protein kinase C iota type [Homo sapiens]
Q9NVV4	case1-VS-control	-1.5647	0.169417	-9.23579	8	1.53e-05	7.47e-05	Down	Q9NVV4	Poly(A) RNA polymerase, mitochondrial OS=Homo sapiens OX=9606 GN=MTPAP PE=1 SV=1	100	0	NP_060579.3	poly(A) RNA polymerase, mitochondrial precursor [Homo sapiens]
Q9UEU0	case1-VS-control	-2.10147	0.227565	-9.2346	8	1.53e-05	7.47e-05	Down	Q9UEU0	Vesicle transport through interaction with t-SNAREs homolog 1B OS=Homo sapiens OX=9606 GN=VTI1B PE=1 SV=3	100	5e-168	NP_006361.1	vesicle transport through interaction with t-SNAREs homolog 1B [Homo sapiens]
Q07812	case1-VS-control	-0.790825	0.0857575	-9.22164	8	1.55e-05	7.53e-05	None	Q07812	Apoptosis regulator BAX OS=Homo sapiens OX=9606 GN=BAX PE=1 SV=1	100	6e-138	NP_620116.1	apoptosis regulator BAX isoform alpha [Homo sapiens]
Q9NV31	case1-VS-control	-0.90191	0.0977931	-9.22263	8	1.55e-05	7.53e-05	None	Q9NV31	U3 small nucleolar ribonucleoprotein protein IMP3 OS=Homo sapiens OX=9606 GN=IMP3 PE=1 SV=1	100	6e-131	NP_060755.1	U3 small nucleolar ribonucleoprotein protein IMP3 [Homo sapiens]
Q9UIA9	case1-VS-control	1.91061	0.20746	9.20956	8	1.56e-05	7.6e-05	Up	Q9UIA9	Exportin-7 OS=Homo sapiens OX=9606 GN=XPO7 PE=1 SV=3	100	0	NP_055839.3	exportin-7 [Homo sapiens]
Q9H7B2	case1-VS-control	-1.31331	0.142912	-9.18963	8	1.59e-05	7.71e-05	Down	Q9H7B2	Ribosome production factor 2 homolog OS=Homo sapiens OX=9606 GN=RPF2 PE=1 SV=2	100	0	NP_115570.1	ribosome production factor 2 homolog isoform 1 [Homo sapiens]
Q15334	case1-VS-control	-1.72332	0.137763	-12.5094	6	1.6e-05	7.73e-05	Down	Q15334	Lethal(2) giant larvae protein homolog 1 OS=Homo sapiens OX=9606 GN=LLGL1 PE=1 SV=3	100	0	Q15334.3	RecName: Full=Lethal(2) giant larvae protein homolog 1; Short=LLGL; AltName: Full=DLG4; AltName: Full=Hugl-1; AltName: Full=Human homolog to the D-lgl gene protein
Q15067	case1-VS-control	-0.673604	0.0733646	-9.18159	8	1.6e-05	7.74e-05	None	Q15067	Peroxisomal acyl-coenzyme A oxidase 1 OS=Homo sapiens OX=9606 GN=ACOX1 PE=1 SV=3	100	0	NP_009223.2	peroxisomal acyl-coenzyme A oxidase 1 isoform b [Homo sapiens]
O95793	case1-VS-control	-2.4546	0.234955	-10.4471	7	1.6e-05	7.75e-05	Down	O95793	Double-stranded RNA-binding protein Staufen homolog 1 OS=Homo sapiens OX=9606 GN=STAU1 PE=1 SV=2	100	0	NP_059347.2	double-stranded RNA-binding protein Staufen homolog 1 isoform b [Homo sapiens]
Q92541	case1-VS-control	3.07245	0.294272	10.4408	7	1.61e-05	7.77e-05	Up	Q92541	RNA polymerase-associated protein RTF1 homolog OS=Homo sapiens OX=9606 GN=RTF1 PE=1 SV=4	100	0	NP_055953.3	RNA polymerase-associated protein RTF1 homolog [Homo sapiens]
Q9NX40	case1-VS-control	-1.2082	0.131843	-9.16395	8	1.62e-05	7.83e-05	Down	Q9NX40	OCIA domain-containing protein 1 OS=Homo sapiens OX=9606 GN=OCIAD1 PE=1 SV=1	100	0	NP_060300.1	OCIA domain-containing protein 1 isoform 1 [Homo sapiens]
P61978	case1-VS-control	-0.35051	0.0382787	-9.15679	8	1.63e-05	7.87e-05	None	P61978	Heterogeneous nuclear ribonucleoprotein K OS=Homo sapiens OX=9606 GN=HNRNPK PE=1 SV=1	100	0	NP_079555.1	heterogeneous nuclear ribonucleoprotein K isoform 2 [Mus musculus]
P15121	case1-VS-control	3.13592	0.34259	9.15354	8	1.64e-05	7.88e-05	Up	P15121	Aldose reductase OS=Homo sapiens OX=9606 GN=AKR1B1 PE=1 SV=3	100	0	NP_001619.1	aldose reductase isoform 1 [Homo sapiens]
Q15363	case1-VS-control	-0.793874	0.0867664	-9.14956	8	1.64e-05	7.89e-05	None	Q15363	Transmembrane emp24 domain-containing protein 2 OS=Homo sapiens OX=9606 GN=TMED2 PE=1 SV=1	100	3e-148	NP_006806.1	transmembrane emp24 domain-containing protein 2 isoform 1 precursor [Homo sapiens]
Q99807	case1-VS-control	-1.65809	0.1812	-9.15061	8	1.64e-05	7.89e-05	Down	Q99807	5-demethoxyubiquinone hydroxylase, mitochondrial OS=Homo sapiens OX=9606 GN=COQ7 PE=1 SV=3	100	1e-160	NP_057222.2	5-demethoxyubiquinone hydroxylase, mitochondrial isoform 1 [Homo sapiens]
O43488	case1-VS-control	0.940504	0.10286	9.14357	8	1.65e-05	7.9e-05	None	O43488	Aflatoxin B1 aldehyde reductase member 2 OS=Homo sapiens OX=9606 GN=AKR7A2 PE=1 SV=3	100	0	NP_003680.2	aflatoxin B1 aldehyde reductase member 2 isoform 1 [Homo sapiens]
P07858	case1-VS-control	-1.97712	0.216206	-9.14461	8	1.65e-05	7.9e-05	Down	P07858	Cathepsin B OS=Homo sapiens OX=9606 GN=CTSB PE=1 SV=3	100	0	NP_001899.1	cathepsin B isoform 1 preproprotein [Homo sapiens]
Q9NTX5	case1-VS-control	-0.999552	0.109308	-9.14438	8	1.65e-05	7.9e-05	None	Q9NTX5	Ethylmalonyl-CoA decarboxylase OS=Homo sapiens OX=9606 GN=ECHDC1 PE=1 SV=2	100	0	NP_001132982.1	ethylmalonyl-CoA decarboxylase isoform 5 [Homo sapiens]
Q8WWV3	case1-VS-control	-1.20817	0.132182	-9.14023	8	1.65e-05	7.91e-05	Down	Q8WWV3	Reticulon-4-interacting protein 1, mitochondrial OS=Homo sapiens OX=9606 GN=RTN4IP1 PE=1 SV=2	100	0	NP_116119.2	reticulon-4-interacting protein 1, mitochondrial isoform 1 precursor [Homo sapiens]
Q8TB37	case1-VS-control	-0.74417	0.0814869	-9.13239	8	1.66e-05	7.96e-05	None	Q8TB37	Iron-sulfur protein NUBPL OS=Homo sapiens OX=9606 GN=NUBPL PE=1 SV=3	100	0	NP_079428.2	iron-sulfur protein NUBPL isoform 1 precursor [Homo sapiens]
Q969V3	case1-VS-control	-0.792983	0.0868855	-9.12676	8	1.67e-05	7.97e-05	None	Q969V3	Nicalin OS=Homo sapiens OX=9606 GN=NCLN PE=1 SV=2	100	0	NP_064555.2	nicalin isoform 1 precursor [Homo sapiens]
Q9Y2Q3	case1-VS-control	-1.0577	0.115887	-9.12694	8	1.67e-05	7.97e-05	Down	Q9Y2Q3	Glutathione S-transferase kappa 1 OS=Homo sapiens OX=9606 GN=GSTK1 PE=1 SV=3	100	2e-167	NP_057001.1	glutathione S-transferase kappa 1 isoform a [Homo sapiens]
Q8WU76	case1-VS-control	-1.48742	0.163094	-9.11998	8	1.68e-05	8.01e-05	Down	Q8WU76	Sec1 family domain-containing protein 2 OS=Homo sapiens OX=9606 GN=SCFD2 PE=1 SV=2	100	0	NP_689753.2	sec1 family domain-containing protein 2 [Homo sapiens]
Q6IBS0	case1-VS-control	1.75583	0.192637	9.11468	8	1.69e-05	8.03e-05	Up	Q6IBS0	Twinfilin-2 OS=Homo sapiens OX=9606 GN=TWF2 PE=1 SV=2	100	0	NP_009215.1	twinfilin-2 [Homo sapiens]
Q9P287	case1-VS-control	2.77308	0.304276	9.1137	8	1.69e-05	8.03e-05	Up	Q9P287	BRCA2 and CDKN1A-interacting protein OS=Homo sapiens OX=9606 GN=BCCIP PE=1 SV=1	100	0	NP_510868.1	BRCA2 and CDKN1A-interacting protein isoform BCCIPbeta [Homo sapiens]
Q9NYU2	case1-VS-control	-1.15382	0.126657	-9.10975	8	1.69e-05	8.05e-05	Down	Q9NYU2	UDP-glucose:glycoprotein glucosyltransferase 1 OS=Homo sapiens OX=9606 GN=UGGT1 PE=1 SV=3	100	0	NP_064505.1	UDP-glucose:glycoprotein glucosyltransferase 1 precursor [Homo sapiens]
Q9Y4W2	case1-VS-control	-0.995399	0.109284	-9.1084	8	1.7e-05	8.05e-05	None	Q9Y4W2	Ribosomal biogenesis protein LAS1L OS=Homo sapiens OX=9606 GN=LAS1L PE=1 SV=2	100	0	NP_112483.1	ribosomal biogenesis protein LAS1L isoform 1 [Homo sapiens]
Q9UNX3	case1-VS-control	1.21456	0.133431	9.10259	8	1.7e-05	8.08e-05	Up	Q9UNX3	60S ribosomal protein L26-like 1 OS=Homo sapiens OX=9606 GN=RPL26L1 PE=1 SV=1	100	2e-100	XP_005265978.1	PREDICTED: 60S ribosomal protein L26-like 1 isoform X1 [Homo sapiens]
Q86T24	case1-VS-control	-2.12614	0.13245	-16.0524	5	1.71e-05	8.09e-05	Down	Q86T24	Transcriptional regulator Kaiso OS=Homo sapiens OX=9606 GN=ZBTB33 PE=1 SV=2	100	0	NP_006768.1	transcriptional regulator Kaiso [Homo sapiens]
O43776	case1-VS-control	2.58753	0.284436	9.09703	8	1.71e-05	8.1e-05	Up	O43776	Asparagine--tRNA ligase, cytoplasmic OS=Homo sapiens OX=9606 GN=NARS PE=1 SV=1	100	0	NP_004530.1	asparagine--tRNA ligase, cytoplasmic [Homo sapiens]
Q643R3	case1-VS-control	-1.01251	0.111313	-9.09605	8	1.71e-05	8.1e-05	Down	Q643R3	Lysophospholipid acyltransferase LPCAT4 OS=Homo sapiens OX=9606 GN=LPCAT4 PE=1 SV=1	100	0	NP_705841.2	lysophospholipid acyltransferase LPCAT4 [Homo sapiens]
Q0VGL1	case1-VS-control	-1.35216	0.148688	-9.09394	8	1.72e-05	8.1e-05	Down	Q0VGL1	Ragulator complex protein LAMTOR4 OS=Homo sapiens OX=9606 GN=LAMTOR4 PE=1 SV=1	100	2e-66	NP_001008396.1	ragulator complex protein LAMTOR4 isoform 1 [Homo sapiens]
Q96D15	case1-VS-control	1.76401	0.0728008	24.2306	4	1.72e-05	8.12e-05	Up	Q96D15	Reticulocalbin-3 OS=Homo sapiens OX=9606 GN=RCN3 PE=1 SV=1	100	0	NP_065701.2	reticulocalbin-3 precursor [Homo sapiens]
P55263	case1-VS-control	4.39642	0.483809	9.0871	8	1.73e-05	8.13e-05	Up	P55263	Adenosine kinase OS=Homo sapiens OX=9606 GN=ADK PE=1 SV=2	100	0	NP_006712.2	adenosine kinase isoform b [Homo sapiens]
Q96I24	case1-VS-control	-0.767825	0.0845369	-9.08272	8	1.73e-05	8.15e-05	None	Q96I24	Far upstream element-binding protein 3 OS=Homo sapiens OX=9606 GN=FUBP3 PE=1 SV=2	100	0	NP_003925.1	far upstream element-binding protein 3 [Homo sapiens]
Q9BWJ5	case1-VS-control	-1.03566	0.114074	-9.0788	8	1.74e-05	8.17e-05	Down	Q9BWJ5	Splicing factor 3B subunit 5 OS=Homo sapiens OX=9606 GN=SF3B5 PE=1 SV=1	100	4e-61	NP_112577.1	splicing factor 3B subunit 5 [Homo sapiens]
P62750	case1-VS-control	1.17048	0.128975	9.07524	8	1.74e-05	8.18e-05	Up	P62750	60S ribosomal protein L23a OS=Homo sapiens OX=9606 GN=RPL23A PE=1 SV=1	100	7e-106	XP_005693322.1	PREDICTED: 60S ribosomal protein L23a [Capra hircus]
Q9BSC4	case1-VS-control	-1.3681	0.150754	-9.07503	8	1.74e-05	8.18e-05	Down	Q9BSC4	Nucleolar protein 10 OS=Homo sapiens OX=9606 GN=NOL10 PE=1 SV=1	100	0	NP_079170.2	nucleolar protein 10 isoform 1 [Homo sapiens]
Q9BY32	case1-VS-control	5.23772	0.507884	10.3128	7	1.75e-05	8.18e-05	Up	Q9BY32	Inosine triphosphate pyrophosphatase OS=Homo sapiens OX=9606 GN=ITPA PE=1 SV=2	100	2e-141	NP_258412.1	inosine triphosphate pyrophosphatase isoform a [Homo sapiens]
P80303	case1-VS-control	-1.16096	0.127982	-9.07129	8	1.75e-05	8.19e-05	Down	P80303	Nucleobindin-2 OS=Homo sapiens OX=9606 GN=NUCB2 PE=1 SV=3	100	0	NP_001339590.1	nucleobindin-2 isoform 3 preproprotein [Homo sapiens]
O00291	case1-VS-control	-1.02414	0.0832334	-12.3044	6	1.76e-05	8.21e-05	Down	O00291	Huntingtin-interacting protein 1 OS=Homo sapiens OX=9606 GN=HIP1 PE=1 SV=5	100	0	NP_005329.3	huntingtin-interacting protein 1 isoform 1 [Homo sapiens]
O95858	case1-VS-control	-1.21042	0.0983852	-12.3028	6	1.76e-05	8.21e-05	Down	O95858	Tetraspanin-15 OS=Homo sapiens OX=9606 GN=TSPAN15 PE=1 SV=1	100	0	NP_036471.1	tetraspanin-15 isoform 1 [Homo sapiens]
P16070	case1-VS-control	-1.01024	0.111536	-9.05751	8	1.77e-05	8.25e-05	Down	P16070	CD44 antigen OS=Homo sapiens OX=9606 GN=CD44 PE=1 SV=3	100	0	NP_000601.3	CD44 antigen isoform 1 precursor [Homo sapiens]
Q13505	case1-VS-control	-2.15932	0.209793	-10.2926	7	1.77e-05	8.25e-05	Down	Q13505	Metaxin-1 OS=Homo sapiens OX=9606 GN=MTX1 PE=1 SV=3	100	0	NP_002446.3	metaxin-1 isoform 1 [Homo sapiens]
O75190	case1-VS-control	-0.826819	0.0913204	-9.05404	8	1.77e-05	8.26e-05	None	O75190	DnaJ homolog subfamily B member 6 OS=Homo sapiens OX=9606 GN=DNAJB6 PE=1 SV=2	100	0	NP_490647.1	dnaJ homolog subfamily B member 6 isoform a [Homo sapiens]
P08240	case1-VS-control	-0.993646	0.109848	-9.04561	8	1.79e-05	8.29e-05	None	P08240	Signal recognition particle receptor subunit alpha OS=Homo sapiens OX=9606 GN=SRPRA PE=1 SV=2	100	0	NP_003130.2	signal recognition particle receptor subunit alpha isoform 1 [Homo sapiens]
Q9BQG0	case1-VS-control	-1.08788	0.12027	-9.04527	8	1.79e-05	8.29e-05	Down	Q9BQG0	Myb-binding protein 1A OS=Homo sapiens OX=9606 GN=MYBBP1A PE=1 SV=2	100	0	NP_055335.2	myb-binding protein 1A isoform 2 [Homo sapiens]
Q9H845	case1-VS-control	-0.948293	0.104827	-9.04626	8	1.78e-05	8.29e-05	None	Q9H845	Acyl-CoA dehydrogenase family member 9, mitochondrial OS=Homo sapiens OX=9606 GN=ACAD9 PE=1 SV=1	100	0	NP_054768.2	acyl-CoA dehydrogenase family member 9, mitochondrial [Homo sapiens]
Q96MW1	case1-VS-control	2.70767	0.299467	9.04162	8	1.79e-05	8.31e-05	Up	Q96MW1	Coiled-coil domain-containing protein 43 OS=Homo sapiens OX=9606 GN=CCDC43 PE=1 SV=2	100	2e-157	NP_653210.2	coiled-coil domain-containing protein 43 isoform 1 [Homo sapiens]
P53999	case1-VS-control	2.88738	0.319403	9.03992	8	1.79e-05	8.31e-05	Up	P53999	Activated RNA polymerase II transcriptional coactivator p15 OS=Homo sapiens OX=9606 GN=SUB1 PE=1 SV=3	100	1e-84	NP_001126574.1	activated RNA polymerase II transcriptional coactivator p15 [Pongo abelii]
Q15428	case1-VS-control	-0.870867	0.0963911	-9.03472	8	1.8e-05	8.34e-05	None	Q15428	Splicing factor 3A subunit 2 OS=Homo sapiens OX=9606 GN=SF3A2 PE=1 SV=2	100	0	NP_009096.2	splicing factor 3A subunit 2 [Homo sapiens]
Q05048	case1-VS-control	-1.47646	0.16349	-9.03091	8	1.81e-05	8.36e-05	Down	Q05048	Cleavage stimulation factor subunit 1 OS=Homo sapiens OX=9606 GN=CSTF1 PE=1 SV=1	99.768	0	KFO31348.1	Cleavage stimulation factor subunit 1 [Fukomys damarensis]
Q14692	case1-VS-control	-1.2045	0.133406	-9.02887	8	1.81e-05	8.36e-05	Down	Q14692	Ribosome biogenesis protein BMS1 homolog OS=Homo sapiens OX=9606 GN=BMS1 PE=1 SV=1	100	0	NP_055568.3	ribosome biogenesis protein BMS1 homolog [Homo sapiens]
P02545	case1-VS-control	-2.65321	0.293908	-9.02735	8	1.81e-05	8.36e-05	Down	P02545	Prelamin-A/C OS=Homo sapiens OX=9606 GN=LMNA PE=1 SV=1	100	0	NP_733821.1	lamin isoform A [Homo sapiens]
O15427	case1-VS-control	-0.643435	0.0712923	-9.02531	8	1.82e-05	8.37e-05	None	O15427	Monocarboxylate transporter 4 OS=Homo sapiens OX=9606 GN=SLC16A3 PE=1 SV=1	100	0	NP_004198.1	monocarboxylate transporter 4 [Homo sapiens]
P62081	case1-VS-control	1.60464	0.177888	9.02054	8	1.82e-05	8.39e-05	Up	P62081	40S ribosomal protein S7 OS=Homo sapiens OX=9606 GN=RPS7 PE=1 SV=1	100	6e-137	NP_001002.1	40S ribosomal protein S7 [Homo sapiens]
Q9NRG9	case1-VS-control	-0.560806	0.0622041	-9.01559	8	1.83e-05	8.42e-05	None	Q9NRG9	Aladin OS=Homo sapiens OX=9606 GN=AAAS PE=1 SV=1	100	0	NP_056480.1	aladin isoform 1 [Homo sapiens]
Q9Y2L1	case1-VS-control	1.14749	0.127422	9.00543	8	1.84e-05	8.48e-05	Up	Q9Y2L1	Exosome complex exonuclease RRP44 OS=Homo sapiens OX=9606 GN=DIS3 PE=1 SV=2	100	0	NP_055768.3	exosome complex exonuclease RRP44 isoform a [Homo sapiens]
Q9NXH8	case1-VS-control	-1.82971	0.17899	-10.2224	7	1.85e-05	8.5e-05	Down	Q9NXH8	Torsin-4A OS=Homo sapiens OX=9606 GN=TOR4A PE=1 SV=2	100	0	NP_060193.2	torsin-4A [Homo sapiens]
Q5SXM8	case1-VS-control	-1.89215	0.210403	-8.99298	8	1.86e-05	8.54e-05	Down	Q5SXM8	DNL-type zinc finger protein OS=Homo sapiens OX=9606 GN=DNLZ PE=1 SV=1	100	1e-125	NP_001074318.1	DNL-type zinc finger protein [Homo sapiens]
Q9BZJ0	case1-VS-control	-1.60294	0.178251	-8.99259	8	1.86e-05	8.54e-05	Down	Q9BZJ0	Crooked neck-like protein 1 OS=Homo sapiens OX=9606 GN=CRNKL1 PE=1 SV=4	100	0	NP_057736.4	crooked neck-like protein 1 isoform a [Homo sapiens]
Q96HY7	case1-VS-control	-1.94961	0.216989	-8.98485	8	1.88e-05	8.59e-05	Down	Q96HY7	Probable 2-oxoglutarate dehydrogenase E1 component DHKTD1, mitochondrial OS=Homo sapiens OX=9606 GN=DHTKD1 PE=1 SV=2	100	0	Q96HY7.2	RecName: Full=Probable 2-oxoglutarate dehydrogenase E1 component DHKTD1, mitochondrial; AltName: Full=Dehydrogenase E1 and transketolase domain-containing protein 1; Flags: Precursor
P50416	case1-VS-control	1.12936	0.125871	8.9724	8	1.9e-05	8.67e-05	Up	P50416	Carnitine O-palmitoyltransferase 1, liver isoform OS=Homo sapiens OX=9606 GN=CPT1A PE=1 SV=2	100	0	XP_005273819.1	PREDICTED: carnitine O-palmitoyltransferase 1, liver isoform isoform X1 [Homo sapiens]
Q8NEJ9	case1-VS-control	-1.18267	0.131898	-8.96657	8	1.9e-05	8.7e-05	Down	Q8NEJ9	Neuroguidin OS=Homo sapiens OX=9606 GN=NGDN PE=1 SV=1	100	0	NP_001036100.1	neuroguidin isoform 1 [Homo sapiens]
O60341	case1-VS-control	-1.03205	0.115161	-8.96183	8	1.91e-05	8.73e-05	Down	O60341	Lysine-specific histone demethylase 1A OS=Homo sapiens OX=9606 GN=KDM1A PE=1 SV=2	100	0	NP_055828.2	lysine-specific histone demethylase 1A isoform b [Homo sapiens]
Q9UJX6	case1-VS-control	-0.888703	0.0991945	-8.95919	8	1.92e-05	8.74e-05	None	Q9UJX6	Anaphase-promoting complex subunit 2 OS=Homo sapiens OX=9606 GN=ANAPC2 PE=1 SV=1	100	0	NP_037498.1	anaphase-promoting complex subunit 2 [Homo sapiens]
Q96EY7	case1-VS-control	-1.30436	0.145614	-8.95768	8	1.92e-05	8.74e-05	Down	Q96EY7	Pentatricopeptide repeat domain-containing protein 3, mitochondrial OS=Homo sapiens OX=9606 GN=PTCD3 PE=1 SV=3	100	0	NP_060422.4	pentatricopeptide repeat domain-containing protein 3, mitochondrial precursor [Homo sapiens]
Q10570	case1-VS-control	-1.49414	0.166878	-8.95349	8	1.93e-05	8.76e-05	Down	Q10570	Cleavage and polyadenylation specificity factor subunit 1 OS=Homo sapiens OX=9606 GN=CPSF1 PE=1 SV=2	100	0	NP_037423.2	cleavage and polyadenylation specificity factor subunit 1 [Homo sapiens]
Q96C19	case1-VS-control	1.15671	0.129492	8.93265	8	1.96e-05	8.9e-05	Up	Q96C19	EF-hand domain-containing protein D2 OS=Homo sapiens OX=9606 GN=EFHD2 PE=1 SV=1	100	1e-171	NP_077305.2	EF-hand domain-containing protein D2 [Homo sapiens]
P11117	case1-VS-control	-0.640694	0.0717559	-8.92879	8	1.96e-05	8.92e-05	None	P11117	Lysosomal acid phosphatase OS=Homo sapiens OX=9606 GN=ACP2 PE=1 SV=3	100	0	NP_001601.1	lysosomal acid phosphatase isoform 1 precursor [Homo sapiens]
Q9UH17	case1-VS-control	-1.76743	0.197959	-8.92829	8	1.97e-05	8.92e-05	Down	Q9UH17	DNA dC->dU-editing enzyme APOBEC-3B OS=Homo sapiens OX=9606 GN=APOBEC3B PE=1 SV=1	100	0	Q9UH17.1	RecName: Full=DNA dC-
Q9H8H3	case1-VS-control	-2.69368	0.223446	-12.0551	6	1.98e-05	8.96e-05	Down	Q9H8H3	Methyltransferase-like protein 7A OS=Homo sapiens OX=9606 GN=METTL7A PE=1 SV=1	100	0	NP_054752.3	methyltransferase-like protein 7A precursor [Homo sapiens]
Q92643	case1-VS-control	-0.795699	0.0892651	-8.91389	8	1.99e-05	9.01e-05	None	Q92643	GPI-anchor transamidase OS=Homo sapiens OX=9606 GN=PIGK PE=1 SV=2	100	0	NP_005473.1	GPI-anchor transamidase precursor [Homo sapiens]
P49915	case1-VS-control	1.84849	0.207894	8.8915	8	2.03e-05	9.16e-05	Up	P49915	GMP synthase [glutamine-hydrolyzing] OS=Homo sapiens OX=9606 GN=GMPS PE=1 SV=1	99.856	0	XP_004037930.1	PREDICTED: GMP synthase [glutamine-hydrolyzing] [Gorilla gorilla gorilla]
Q8TBC4	case1-VS-control	3.68242	0.414181	8.89084	8	2.03e-05	9.16e-05	Up	Q8TBC4	NEDD8-activating enzyme E1 catalytic subunit OS=Homo sapiens OX=9606 GN=UBA3 PE=1 SV=2	100	0	NP_003959.3	NEDD8-activating enzyme E1 catalytic subunit isoform 1 [Homo sapiens]
O43181	case1-VS-control	-0.746662	0.0840141	-8.88735	8	2.03e-05	9.18e-05	None	O43181	NADH dehydrogenase [ubiquinone] iron-sulfur protein 4, mitochondrial OS=Homo sapiens OX=9606 GN=NDUFS4 PE=1 SV=1	100	3e-125	NP_002486.1	NADH dehydrogenase [ubiquinone] iron-sulfur protein 4, mitochondrial isoform 1 precursor [Homo sapiens]
O60678	case1-VS-control	3.51074	0.348724	10.0674	7	2.05e-05	9.22e-05	Up	O60678	Protein arginine N-methyltransferase 3 OS=Homo sapiens OX=9606 GN=PRMT3 PE=1 SV=4	100	0	NP_005779.1	protein arginine N-methyltransferase 3 isoform 1 [Homo sapiens]
P62266	case1-VS-control	1.75784	0.198005	8.87777	8	2.05e-05	9.22e-05	Up	P62266	40S ribosomal protein S23 OS=Homo sapiens OX=9606 GN=RPS23 PE=1 SV=3	100	3e-100	NP_001016.1	40S ribosomal protein S23 [Homo sapiens]
Q9H8H0	case1-VS-control	-1.182	0.133144	-8.87767	8	2.05e-05	9.22e-05	Down	Q9H8H0	Nucleolar protein 11 OS=Homo sapiens OX=9606 GN=NOL11 PE=1 SV=1	100	0	NP_056277.2	nucleolar protein 11 isoform 1 [Homo sapiens]
Q15181	case1-VS-control	4.29506	0.483956	8.87489	8	2.05e-05	9.23e-05	Up	Q15181	Inorganic pyrophosphatase OS=Homo sapiens OX=9606 GN=PPA1 PE=1 SV=2	100	0	NP_066952.1	inorganic pyrophosphatase [Homo sapiens]
Q96I99	case1-VS-control	-1.40212	0.157984	-8.8751	8	2.05e-05	9.23e-05	Down	Q96I99	Succinate--CoA ligase [GDP-forming] subunit beta, mitochondrial OS=Homo sapiens OX=9606 GN=SUCLG2 PE=1 SV=2	100	0	NP_003839.2	succinate--CoA ligase [GDP-forming] subunit beta, mitochondrial isoform 2 precursor [Homo sapiens]
P08243	case1-VS-control	5.26906	0.594255	8.86666	8	2.07e-05	9.27e-05	Up	P08243	Asparagine synthetase [glutamine-hydrolyzing] OS=Homo sapiens OX=9606 GN=ASNS PE=1 SV=4	100	0	NP_597680.2	asparagine synthetase [glutamine-hydrolyzing] isoform a [Homo sapiens]
P12268	case1-VS-control	1.99779	0.225317	8.86657	8	2.07e-05	9.27e-05	Up	P12268	Inosine-5'-monophosphate dehydrogenase 2 OS=Homo sapiens OX=9606 GN=IMPDH2 PE=1 SV=2	100	0	NP_000875.2	inosine-5'-monophosphate dehydrogenase 2 [Homo sapiens]
Q12899	case1-VS-control	1.84196	0.15406	11.9561	6	2.07e-05	9.29e-05	Up	Q12899	Tripartite motif-containing protein 26 OS=Homo sapiens OX=9606 GN=TRIM26 PE=1 SV=1	100	0	NP_003440.1	tripartite motif-containing protein 26 [Homo sapiens]
O00764	case1-VS-control	4.08595	0.461337	8.85676	8	2.08e-05	9.32e-05	Up	O00764	Pyridoxal kinase OS=Homo sapiens OX=9606 GN=PDXK PE=1 SV=1	100	0	NP_003672.1	pyridoxal kinase isoform 1 [Homo sapiens]
Q15269	case1-VS-control	-1.13811	0.128493	-8.85736	8	2.08e-05	9.32e-05	Down	Q15269	Periodic tryptophan protein 2 homolog OS=Homo sapiens OX=9606 GN=PWP2 PE=2 SV=2	100	0	NP_005040.2	periodic tryptophan protein 2 homolog [Homo sapiens]
Q10469	case1-VS-control	-1.16362	0.131435	-8.85318	8	2.09e-05	9.34e-05	Down	Q10469	Alpha-1,6-mannosyl-glycoprotein 2-beta-N-acetylglucosaminyltransferase OS=Homo sapiens OX=9606 GN=MGAT2 PE=1 SV=1	100	0	BAG56770.1	unnamed protein product [Homo sapiens]
P37840	case1-VS-control	1.36312	0.114199	11.9363	6	2.09e-05	9.34e-05	Up	P37840	Alpha-synuclein OS=Homo sapiens OX=9606 GN=SNCA PE=1 SV=1	100	3e-92	NP_000336.1	alpha-synuclein isoform NACP140 [Homo sapiens]
Q9UNN8	case1-VS-control	-1.03676	0.117272	-8.84064	8	2.11e-05	9.42e-05	Down	Q9UNN8	Endothelial protein C receptor OS=Homo sapiens OX=9606 GN=PROCR PE=1 SV=1	100	8e-176	NP_006395.2	endothelial protein C receptor precursor [Homo sapiens]
P07203	case1-VS-control	0.5954	0.0674794	8.82344	8	2.14e-05	9.54e-05	None	P07203	Glutathione peroxidase 1 OS=Homo sapiens OX=9606 GN=GPX1 PE=1 SV=4	100	2e-147	NP_000572.2	glutathione peroxidase 1 isoform 1 [Homo sapiens]
Q9GZT9	case1-VS-control	1.1279	0.127858	8.82144	8	2.15e-05	9.55e-05	Up	Q9GZT9	Egl nine homolog 1 OS=Homo sapiens OX=9606 GN=EGLN1 PE=1 SV=1	100	0	NP_071334.1	egl nine homolog 1 [Homo sapiens]
Q5QJE6	case1-VS-control	-0.997725	0.113214	-8.81277	8	2.16e-05	9.59e-05	None	Q5QJE6	Deoxynucleotidyltransferase terminal-interacting protein 2 OS=Homo sapiens OX=9606 GN=DNTTIP2 PE=1 SV=2	100	0	NP_055412.2	deoxynucleotidyltransferase terminal-interacting protein 2 [Homo sapiens]
Q96EP5	case1-VS-control	-0.84031	0.0953444	-8.81342	8	2.16e-05	9.59e-05	None	Q96EP5	DAZ-associated protein 1 OS=Homo sapiens OX=9606 GN=DAZAP1 PE=1 SV=1	100	0	NP_061832.2	DAZ-associated protein 1 isoform b [Homo sapiens]
Q96RN5	case1-VS-control	-1.67951	0.190563	-8.81339	8	2.16e-05	9.59e-05	Down	Q96RN5	Mediator of RNA polymerase II transcription subunit 15 OS=Homo sapiens OX=9606 GN=MED15 PE=1 SV=2	100	0	NP_001003891.1	mediator of RNA polymerase II transcription subunit 15 isoform a [Homo sapiens]
Q70UQ0	case1-VS-control	-2.10771	0.23923	-8.81041	8	2.17e-05	9.6e-05	Down	Q70UQ0	Inhibitor of nuclear factor kappa-B kinase-interacting protein OS=Homo sapiens OX=9606 GN=IKBIP PE=1 SV=1	100	0	NP_963906.1	inhibitor of nuclear factor kappa-B kinase-interacting protein isoform 2 [Homo sapiens]
O14908	case1-VS-control	0.602987	0.0684579	8.80814	8	2.17e-05	9.61e-05	None	O14908	PDZ domain-containing protein GIPC1 OS=Homo sapiens OX=9606 GN=GIPC1 PE=1 SV=2	100	0	NP_005707.1	PDZ domain-containing protein GIPC1 isoform 1 [Homo sapiens]
P21281	case1-VS-control	-0.929656	0.105659	-8.79861	8	2.19e-05	9.68e-05	None	P21281	V-type proton ATPase subunit B, brain isoform OS=Homo sapiens OX=9606 GN=ATP6V1B2 PE=1 SV=3	100	0	NP_001684.2	V-type proton ATPase subunit B, brain isoform [Homo sapiens]
Q9P0M9	case1-VS-control	-1.59932	0.181887	-8.79296	8	2.2e-05	9.71e-05	Down	Q9P0M9	39S ribosomal protein L27, mitochondrial OS=Homo sapiens OX=9606 GN=MRPL27 PE=1 SV=1	100	2e-104	NP_057588.1	39S ribosomal protein L27, mitochondrial [Homo sapiens]
Q9UP83	case1-VS-control	1.41585	0.161166	8.78499	8	2.21e-05	9.77e-05	Up	Q9UP83	Conserved oligomeric Golgi complex subunit 5 OS=Homo sapiens OX=9606 GN=COG5 PE=1 SV=3	100	0	NP_859422.2	conserved oligomeric Golgi complex subunit 5 isoform 2 [Homo sapiens]
Q9H444	case1-VS-control	1.82407	0.207761	8.77963	8	2.22e-05	9.8e-05	Up	Q9H444	Charged multivesicular body protein 4b OS=Homo sapiens OX=9606 GN=CHMP4B PE=1 SV=1	100	5e-160	NP_789782.1	charged multivesicular body protein 4b [Homo sapiens]
Q9P031	case1-VS-control	0.893302	0.0757154	11.7981	6	2.24e-05	9.87e-05	None	Q9P031	Thyroid transcription factor 1-associated protein 26 OS=Homo sapiens OX=9606 GN=CCDC59 PE=1 SV=2	100	4e-177	NP_054886.2	thyroid transcription factor 1-associated protein 26 [Homo sapiens]
Q92530	case1-VS-control	2.68287	0.176661	15.1866	5	2.24e-05	9.88e-05	Up	Q92530	Proteasome inhibitor PI31 subunit OS=Homo sapiens OX=9606 GN=PSMF1 PE=1 SV=2	100	0	NP_006805.2	proteasome inhibitor PI31 subunit isoform 1 [Homo sapiens]
P54619	case1-VS-control	2.15126	0.217005	9.91343	7	2.27e-05	9.96e-05	Up	P54619	5'-AMP-activated protein kinase subunit gamma-1 OS=Homo sapiens OX=9606 GN=PRKAG1 PE=1 SV=1	100	0	NP_002724.1	5'-AMP-activated protein kinase subunit gamma-1 isoform 1 [Homo sapiens]
P11172	case1-VS-control	1.24518	0.142425	8.74271	8	2.29e-05	0.000100707	Up	P11172	Uridine 5'-monophosphate synthase OS=Homo sapiens OX=9606 GN=UMPS PE=1 SV=1	100	0	NP_000364.1	uridine 5'-monophosphate synthase [Homo sapiens]
O75683	case1-VS-control	-1.35306	0.154828	-8.73915	8	2.3e-05	0.00010091	Down	O75683	Surfeit locus protein 6 OS=Homo sapiens OX=9606 GN=SURF6 PE=1 SV=3	100	0	AAH03001.1	SURF6 protein, partial [Homo sapiens]
O43395	case1-VS-control	-0.849748	0.0973179	-8.73168	8	2.31e-05	0.000101446	None	O43395	U4/U6 small nuclear ribonucleoprotein Prp3 OS=Homo sapiens OX=9606 GN=PRPF3 PE=1 SV=2	100	0	NP_004689.1	U4/U6 small nuclear ribonucleoprotein Prp3 isoform 1 [Homo sapiens]
Q8N129	case1-VS-control	-1.26077	0.144443	-8.72847	8	2.32e-05	0.000101621	Down	Q8N129	Protein canopy homolog 4 OS=Homo sapiens OX=9606 GN=CNPY4 PE=2 SV=1	100	9e-179	NP_689968.1	protein canopy homolog 4 precursor [Homo sapiens]
Q06136	case1-VS-control	-2.80421	0.321373	-8.72572	8	2.33e-05	0.000101757	Down	Q06136	3-ketodihydrosphingosine reductase OS=Homo sapiens OX=9606 GN=KDSR PE=1 SV=1	100	0	NP_002026.1	3-ketodihydrosphingosine reductase precursor [Homo sapiens]
Q9NYL9	case1-VS-control	1.00688	0.115541	8.71449	8	2.35e-05	0.000102622	Up	Q9NYL9	Tropomodulin-3 OS=Homo sapiens OX=9606 GN=TMOD3 PE=1 SV=1	100	0	NP_055362.1	tropomodulin-3 [Homo sapiens]
Q96N66	case1-VS-control	-1.33889	0.153727	-8.70955	8	2.36e-05	0.00010295	Down	Q96N66	Lysophospholipid acyltransferase 7 OS=Homo sapiens OX=9606 GN=MBOAT7 PE=1 SV=2	100	0	NP_077274.3	lysophospholipid acyltransferase 7 isoform 1 [Homo sapiens]
Q8NBJ9	case1-VS-control	-3.17764	0.322808	-9.84376	7	2.37e-05	0.000103559	Down	Q8NBJ9	SID1 transmembrane family member 2 OS=Homo sapiens OX=9606 GN=SIDT2 PE=1 SV=2	100	0	NP_001035545.1	SID1 transmembrane family member 2 precursor [Homo sapiens]
P31949	case1-VS-control	4.98487	0.573001	8.6996	8	2.38e-05	0.000103616	Up	P31949	Protein S100-A11 OS=Homo sapiens OX=9606 GN=S100A11 PE=1 SV=2	100	3e-73	NP_005611.1	protein S100-A11 [Homo sapiens]
P04083	case1-VS-control	4.6625	0.536736	8.68677	8	2.4e-05	0.00010444	Up	P04083	Annexin A1 OS=Homo sapiens OX=9606 GN=ANXA1 PE=1 SV=2	100	0	NP_000691.1	annexin A1 [Homo sapiens]
P04156	case1-VS-control	-3.21522	0.275819	-11.657	6	2.4e-05	0.00010444	Down	P04156	Major prion protein OS=Homo sapiens OX=9606 GN=PRNP PE=1 SV=1	100	0	NP_000302.1	major prion protein isoform Prp preproprotein [Homo sapiens]
Q9H307	case1-VS-control	-1.14735	0.132053	-8.68856	8	2.4e-05	0.00010444	Down	Q9H307	Pinin OS=Homo sapiens OX=9606 GN=PNN PE=1 SV=5	99.861	0	NP_002678.2	pinin [Homo sapiens]
P82673	case1-VS-control	-1.29916	0.149689	-8.67904	8	2.42e-05	0.000105021	Down	P82673	28S ribosomal protein S35, mitochondrial OS=Homo sapiens OX=9606 GN=MRPS35 PE=1 SV=1	100	0	NP_068593.2	28S ribosomal protein S35, mitochondrial isoform 1 precursor [Homo sapiens]
O75153	case1-VS-control	2.4687	0.284624	8.67353	8	2.43e-05	0.000105409	Up	O75153	Clustered mitochondria protein homolog OS=Homo sapiens OX=9606 GN=CLUH PE=1 SV=2	100	0	NP_056044.3	clustered mitochondria protein homolog [Homo sapiens]
P50570	case1-VS-control	-1.29537	0.149556	-8.66147	8	2.45e-05	0.000106291	Down	P50570	Dynamin-2 OS=Homo sapiens OX=9606 GN=DNM2 PE=1 SV=2	100	0	NP_001005360.1	dynamin-2 isoform 1 [Homo sapiens]
Q9BU76	case1-VS-control	1.82846	0.211105	8.66139	8	2.45e-05	0.000106291	Up	Q9BU76	Multiple myeloma tumor-associated protein 2 OS=Homo sapiens OX=9606 GN=MMTAG2 PE=1 SV=1	100	0	NP_077295.1	multiple myeloma tumor-associated protein 2 [Homo sapiens]
Q9ULW3	case1-VS-control	-1.1016	0.127228	-8.65846	8	2.46e-05	0.000106453	Down	Q9ULW3	Activator of basal transcription 1 OS=Homo sapiens OX=9606 GN=ABT1 PE=1 SV=1	100	0	NP_037507.1	activator of basal transcription 1 [Homo sapiens]
Q76FK4	case1-VS-control	-2.25144	0.230039	-9.78721	7	2.46e-05	0.00010654	Down	Q76FK4	Nucleolar protein 8 OS=Homo sapiens OX=9606 GN=NOL8 PE=1 SV=1	100	0	NP_060418.4	nucleolar protein 8 isoform a [Homo sapiens]
Q9Y3A6	case1-VS-control	-0.965897	0.111633	-8.65242	8	2.47e-05	0.000106795	None	Q9Y3A6	Transmembrane emp24 domain-containing protein 5 OS=Homo sapiens OX=9606 GN=TMED5 PE=1 SV=1	100	2e-169	NP_057124.3	transmembrane emp24 domain-containing protein 5 isoform 1 precursor [Homo sapiens]
Q9NZJ6	case1-VS-control	-2.06034	0.238202	-8.64953	8	2.48e-05	0.000106954	Down	Q9NZJ6	Ubiquinone biosynthesis O-methyltransferase, mitochondrial OS=Homo sapiens OX=9606 GN=COQ3 PE=1 SV=3	100	0	NP_059117.3	ubiquinone biosynthesis O-methyltransferase, mitochondrial [Homo sapiens]
Q53EL6	case1-VS-control	2.62405	0.303582	8.64361	8	2.49e-05	0.000107389	Up	Q53EL6	Programmed cell death protein 4 OS=Homo sapiens OX=9606 GN=PDCD4 PE=1 SV=2	100	0	NP_055271.2	programmed cell death protein 4 isoform 1 [Homo sapiens]
Q9UBU9	case1-VS-control	0.529101	0.0612805	8.63408	8	2.51e-05	0.000108155	None	Q9UBU9	Nuclear RNA export factor 1 OS=Homo sapiens OX=9606 GN=NXF1 PE=1 SV=1	99.838	0	XP_007993342.1	PREDICTED: nuclear RNA export factor 1 [Chlorocebus sabaeus]
Q01780	case1-VS-control	-0.618344	0.0716562	-8.62931	8	2.52e-05	0.000108489	None	Q01780	Exosome component 10 OS=Homo sapiens OX=9606 GN=EXOSC10 PE=1 SV=2	100	0	NP_001001998.1	exosome component 10 isoform 1 [Homo sapiens]
Q9Y6R0	case1-VS-control	-2.10383	0.215744	-9.75149	7	2.52e-05	0.000108514	Down	Q9Y6R0	Numb-like protein OS=Homo sapiens OX=9606 GN=NUMBL PE=1 SV=1	100	0	NP_004747.1	numb-like protein isoform a [Homo sapiens]
P83436	case1-VS-control	1.48706	0.172426	8.6243	8	2.53e-05	0.000108715	Up	P83436	Conserved oligomeric Golgi complex subunit 7 OS=Homo sapiens OX=9606 GN=COG7 PE=1 SV=1	100	0	NP_705831.1	conserved oligomeric Golgi complex subunit 7 [Homo sapiens]
Q5VT66	case1-VS-control	2.47281	0.286752	8.62352	8	2.53e-05	0.000108715	Up	Q5VT66	Mitochondrial amidoxime-reducing component 1 OS=Homo sapiens OX=9606 GN=MARC1 PE=1 SV=1	100	0	NP_073583.3	mitochondrial amidoxime-reducing component 1 precursor [Homo sapiens]
P54577	case1-VS-control	4.54067	0.526917	8.61743	8	2.55e-05	0.000109174	Up	P54577	Tyrosine--tRNA ligase, cytoplasmic OS=Homo sapiens OX=9606 GN=YARS PE=1 SV=4	100	0	NP_003671.1	tyrosine--tRNA ligase, cytoplasmic [Homo sapiens]
P54802	case1-VS-control	-1.30751	0.151764	-8.6154	8	2.55e-05	0.000109259	Down	P54802	Alpha-N-acetylglucosaminidase OS=Homo sapiens OX=9606 GN=NAGLU PE=1 SV=2	100	0	NP_000254.2	alpha-N-acetylglucosaminidase precursor [Homo sapiens]
Q9Y2R9	case1-VS-control	-1.54079	0.179052	-8.60524	8	2.57e-05	0.000110101	Down	Q9Y2R9	28S ribosomal protein S7, mitochondrial OS=Homo sapiens OX=9606 GN=MRPS7 PE=1 SV=2	100	0	NP_057055.2	28S ribosomal protein S7, mitochondrial [Homo sapiens]
P30086	case1-VS-control	3.61883	0.420895	8.59794	8	2.59e-05	0.000110681	Up	P30086	Phosphatidylethanolamine-binding protein 1 OS=Homo sapiens OX=9606 GN=PEBP1 PE=1 SV=3	100	2e-136	NP_002558.1	phosphatidylethanolamine-binding protein 1 [Homo sapiens]
Q86W42	case1-VS-control	-1.04517	0.121716	-8.58692	8	2.61e-05	0.000111617	Down	Q86W42	THO complex subunit 6 homolog OS=Homo sapiens OX=9606 GN=THOC6 PE=1 SV=1	100	0	NP_077315.2	THO complex subunit 6 homolog isoform 1 [Homo sapiens]
O15047	case1-VS-control	-1.39105	0.162022	-8.58556	8	2.62e-05	0.000111641	Down	O15047	Histone-lysine N-methyltransferase SETD1A OS=Homo sapiens OX=9606 GN=SETD1A PE=1 SV=3	100	0	NP_055527.1	histone-lysine N-methyltransferase SETD1A [Homo sapiens]
Q9UQE7	case1-VS-control	0.732981	0.0853909	8.58383	8	2.62e-05	0.000111701	None	Q9UQE7	Structural maintenance of chromosomes protein 3 OS=Homo sapiens OX=9606 GN=SMC3 PE=1 SV=2	100	0	NP_005436.1	structural maintenance of chromosomes protein 3 [Homo sapiens]
O60306	case1-VS-control	-0.757147	0.0882446	-8.5801	8	2.63e-05	0.000111951	None	O60306	RNA helicase aquarius OS=Homo sapiens OX=9606 GN=AQR PE=1 SV=4	100	0	NP_055506.1	intron-binding protein aquarius [Homo sapiens]
P35613	case1-VS-control	-1.05431	0.122926	-8.57673	8	2.64e-05	0.000111985	Down	P35613	Basigin OS=Homo sapiens OX=9606 GN=BSG PE=1 SV=2	100	0	NP_001719.2	basigin isoform 1 precursor [Homo sapiens]
P39656	case1-VS-control	-0.825196	0.0962265	-8.57556	8	2.64e-05	0.000111985	None	P39656	Dolichyl-diphosphooligosaccharide--protein glycosyltransferase 48 kDa subunit OS=Homo sapiens OX=9606 GN=DDOST PE=1 SV=4	100	0	P39656.4	RecName: Full=Dolichyl-diphosphooligosaccharide--protein glycosyltransferase 48 kDa subunit; Short=DDOST 48 kDa subunit; Short=Oligosaccharyl transferase 48 kDa subunit; Flags: Precursor
Q00535	case1-VS-control	1.91925	0.223811	8.57535	8	2.64e-05	0.000111985	Up	Q00535	Cyclin-dependent-like kinase 5 OS=Homo sapiens OX=9606 GN=CDK5 PE=1 SV=3	100	0	NP_004926.1	cyclin-dependent-like kinase 5 isoform 1 [Homo sapiens]
Q15800	case1-VS-control	-3.07356	0.358412	-8.5755	8	2.64e-05	0.000111985	Down	Q15800	Methylsterol monooxygenase 1 OS=Homo sapiens OX=9606 GN=MSMO1 PE=1 SV=1	100	0	NP_006736.1	methylsterol monooxygenase 1 isoform 1 [Homo sapiens]
Q9NX62	case1-VS-control	-1.05051	0.122574	-8.57045	8	2.65e-05	0.000112349	Down	Q9NX62	Inositol monophosphatase 3 OS=Homo sapiens OX=9606 GN=IMPAD1 PE=1 SV=1	100	0	NP_060283.3	inositol monophosphatase 3 [Homo sapiens]
Q9NX46	case1-VS-control	1.24845	0.145771	8.56448	8	2.66e-05	0.000112817	Up	Q9NX46	Poly(ADP-ribose) glycohydrolase ARH3 OS=Homo sapiens OX=9606 GN=ADPRHL2 PE=1 SV=1	100	0	NP_060295.1	poly(ADP-ribose) glycohydrolase ARH3 [Homo sapiens]
O15164	case1-VS-control	-0.964055	0.112668	-8.55662	8	2.68e-05	0.000113402	None	O15164	Transcription intermediary factor 1-alpha OS=Homo sapiens OX=9606 GN=TRIM24 PE=1 SV=3	100	0	NP_056989.2	transcription intermediary factor 1-alpha isoform a [Homo sapiens]
Q6ZSJ8	case1-VS-control	1.60021	0.165627	9.66153	7	2.68e-05	0.000113402	Up	Q6ZSJ8	Uncharacterized protein C1orf122 OS=Homo sapiens OX=9606 GN=C1orf122 PE=4 SV=2	100	2e-69	NP_940848.2	uncharacterized protein C1orf122 isoform 1 [Homo sapiens]
Q9BYD6	case1-VS-control	-1.19269	0.139471	-8.55156	8	2.69e-05	0.000113643	Down	Q9BYD6	39S ribosomal protein L1, mitochondrial OS=Homo sapiens OX=9606 GN=MRPL1 PE=1 SV=2	100	0	NP_064621.3	39S ribosomal protein L1, mitochondrial precursor [Homo sapiens]
Q9H173	case1-VS-control	-1.34446	0.157205	-8.55227	8	2.69e-05	0.000113643	Down	Q9H173	Nucleotide exchange factor SIL1 OS=Homo sapiens OX=9606 GN=SIL1 PE=1 SV=1	100	0	XP_011541872.1	PREDICTED: nucleotide exchange factor SIL1 isoform X1 [Homo sapiens]
O75976	case1-VS-control	-1.0229	0.119706	-8.54508	8	2.71e-05	0.000114166	Down	O75976	Carboxypeptidase D OS=Homo sapiens OX=9606 GN=CPD PE=1 SV=2	100	0	NP_001295.2	carboxypeptidase D isoform 1 precursor [Homo sapiens]
P62854	case1-VS-control	2.66838	0.312458	8.53997	8	2.72e-05	0.00011456	Up	P62854	40S ribosomal protein S26 OS=Homo sapiens OX=9606 GN=RPS26 PE=1 SV=3	100	8e-79	XP_007995529.1	PREDICTED: 40S ribosomal protein S26-like [Chlorocebus sabaeus]
P48444	case1-VS-control	2.1856	0.256058	8.53557	8	2.73e-05	0.000114884	Up	P48444	Coatomer subunit delta OS=Homo sapiens OX=9606 GN=ARCN1 PE=1 SV=1	100	0	NP_001646.2	coatomer subunit delta isoform 1 [Homo sapiens]
P33240	case1-VS-control	-1.23584	0.144989	-8.52366	8	2.76e-05	0.000115953	Down	P33240	Cleavage stimulation factor subunit 2 OS=Homo sapiens OX=9606 GN=CSTF2 PE=1 SV=1	100	0	NP_001316.1	cleavage stimulation factor subunit 2 isoform 2 [Homo sapiens]
Q13445	case1-VS-control	-1.55379	0.182387	-8.51922	8	2.77e-05	0.000116286	Down	Q13445	Transmembrane emp24 domain-containing protein 1 OS=Homo sapiens OX=9606 GN=TMED1 PE=1 SV=1	100	2e-165	NP_006849.1	transmembrane emp24 domain-containing protein 1 precursor [Homo sapiens]
P27824	case1-VS-control	-1.06643	0.125196	-8.51813	8	2.77e-05	0.000116287	Down	P27824	Calnexin OS=Homo sapiens OX=9606 GN=CANX PE=1 SV=2	100	0	XP_011532966.1	PREDICTED: calnexin isoform X2 [Homo sapiens]
Q15637	case1-VS-control	-0.452721	0.0531934	-8.51085	8	2.79e-05	0.000116906	None	Q15637	Splicing factor 1 OS=Homo sapiens OX=9606 GN=SF1 PE=1 SV=4	100	0	NP_004621.2	splicing factor 1 isoform 1 [Homo sapiens]
P53621	case1-VS-control	1.99548	0.234867	8.49619	8	2.82e-05	0.000118274	Up	P53621	Coatomer subunit alpha OS=Homo sapiens OX=9606 GN=COPA PE=1 SV=2	100	0	NP_004362.2	coatomer subunit alpha isoform 2 [Homo sapiens]
O14497	case1-VS-control	-1.11955	0.117016	-9.56753	7	2.86e-05	0.000119585	Down	O14497	AT-rich interactive domain-containing protein 1A OS=Homo sapiens OX=9606 GN=ARID1A PE=1 SV=3	100	0	NP_006006.3	AT-rich interactive domain-containing protein 1A isoform a [Homo sapiens]
Q13200	case1-VS-control	1.50866	0.177867	8.48197	8	2.86e-05	0.000119585	Up	Q13200	26S proteasome non-ATPase regulatory subunit 2 OS=Homo sapiens OX=9606 GN=PSMD2 PE=1 SV=3	100	0	NP_002799.3	26S proteasome non-ATPase regulatory subunit 2 isoform 1 [Homo sapiens]
Q11206	case1-VS-control	0.884349	0.0782595	11.3002	6	2.87e-05	0.000119992	None	Q11206	CMP-N-acetylneuraminate-beta-galactosamide-alpha-2,3-sialyltransferase 4 OS=Homo sapiens OX=9606 GN=ST3GAL4 PE=2 SV=1	100	0	NP_001241686.1	CMP-N-acetylneuraminate-beta-galactosamide-alpha-2,3-sialyltransferase 4 isoform 2 [Homo sapiens]
P40937	case1-VS-control	0.56741	0.0669707	8.47252	8	2.88e-05	0.000120259	None	P40937	Replication factor C subunit 5 OS=Homo sapiens OX=9606 GN=RFC5 PE=1 SV=1	100	0	NP_031396.1	replication factor C subunit 5 isoform 1 [Homo sapiens]
Q9Y617	case1-VS-control	5.12683	0.605834	8.46243	8	2.91e-05	0.000121195	Up	Q9Y617	Phosphoserine aminotransferase OS=Homo sapiens OX=9606 GN=PSAT1 PE=1 SV=2	100	0	NP_478059.1	phosphoserine aminotransferase isoform 1 [Homo sapiens]
P05423	case1-VS-control	2.30525	0.242257	9.51571	7	2.96e-05	0.000123467	Up	P05423	DNA-directed RNA polymerase III subunit RPC4 OS=Homo sapiens OX=9606 GN=POLR3D PE=1 SV=2	100	0	NP_001713.2	DNA-directed RNA polymerase III subunit RPC4 [Homo sapiens]
Q2NL82	case1-VS-control	2.4328	0.288373	8.43629	8	2.97e-05	0.000123726	Up	Q2NL82	Pre-rRNA-processing protein TSR1 homolog OS=Homo sapiens OX=9606 GN=TSR1 PE=1 SV=1	100	0	NP_060598.3	pre-rRNA-processing protein TSR1 homolog [Homo sapiens]
P49721	case1-VS-control	2.00267	0.237421	8.43509	8	2.98e-05	0.000123742	Up	P49721	Proteasome subunit beta type-2 OS=Homo sapiens OX=9606 GN=PSMB2 PE=1 SV=1	100	1e-148	NP_002785.1	proteasome subunit beta type-2 isoform 1 [Homo sapiens]
Q9P2W9	case1-VS-control	-0.932792	0.110623	-8.4322	8	2.98e-05	0.000123938	None	Q9P2W9	Syntaxin-18 OS=Homo sapiens OX=9606 GN=STX18 PE=1 SV=1	100	0	NP_058626.1	syntaxin-18 isoform 1 [Homo sapiens]
P48507	case1-VS-control	3.99763	0.474193	8.4304	8	2.99e-05	0.000124017	Up	P48507	Glutamate--cysteine ligase regulatory subunit OS=Homo sapiens OX=9606 GN=GCLM PE=1 SV=1	100	0	NP_002052.1	glutamate--cysteine ligase regulatory subunit isoform 1 [Homo sapiens]
Q9BZF1	case1-VS-control	-1.03206	0.122444	-8.42887	8	2.99e-05	0.000124068	Down	Q9BZF1	Oxysterol-binding protein-related protein 8 OS=Homo sapiens OX=9606 GN=OSBPL8 PE=1 SV=3	100	0	NP_065892.1	oxysterol-binding protein-related protein 8 isoform a [Homo sapiens]
Q96MY1	case1-VS-control	-1.52714	0.181323	-8.42219	8	3.01e-05	0.000124672	Down	Q96MY1	Nucleolar protein 4-like OS=Homo sapiens OX=9606 GN=NOL4L PE=1 SV=2	100	0	XP_003814786.1	PREDICTED: nucleolar protein 4-like isoform X3 [Pan paniscus]
O15294	case1-VS-control	-0.5209	0.0618927	-8.41619	8	3.03e-05	0.000125154	None	O15294	UDP-N-acetylglucosamine--peptide N-acetylglucosaminyltransferase 110 kDa subunit OS=Homo sapiens OX=9606 GN=OGT PE=1 SV=3	100	0	NP_858058.1	UDP-N-acetylglucosamine--peptide N-acetylglucosaminyltransferase 110 kDa subunit isoform 1 [Homo sapiens]
Q12788	case1-VS-control	-0.961966	0.114307	-8.41562	8	3.03e-05	0.000125154	None	Q12788	Transducin beta-like protein 3 OS=Homo sapiens OX=9606 GN=TBL3 PE=1 SV=2	100	0	NP_006444.2	transducin beta-like protein 3 [Homo sapiens]
O00399	case1-VS-control	-1.06038	0.126097	-8.40926	8	3.04e-05	0.000125729	Down	O00399	Dynactin subunit 6 OS=Homo sapiens OX=9606 GN=DCTN6 PE=1 SV=1	100	8e-138	NP_006562.1	dynactin subunit 6 [Homo sapiens]
Q9NTG7	case1-VS-control	-2.44486	0.290914	-8.40408	8	3.06e-05	0.000126179	Down	Q9NTG7	NAD-dependent protein deacetylase sirtuin-3, mitochondrial OS=Homo sapiens OX=9606 GN=SIRT3 PE=1 SV=2	100	0	NP_036371.1	NAD-dependent protein deacetylase sirtuin-3, mitochondrial isoform a [Homo sapiens]
Q2TAY7	case1-VS-control	-0.792778	0.0946219	-8.37837	8	3.13e-05	0.000128902	None	Q2TAY7	WD40 repeat-containing protein SMU1 OS=Homo sapiens OX=9606 GN=SMU1 PE=1 SV=2	100	0	NP_001033662.1	WD40 repeat-containing protein SMU1 [Bos taurus]
Q9NVH0	case1-VS-control	-1.06833	0.12758	-8.37382	8	3.14e-05	0.000129295	Down	Q9NVH0	Exonuclease 3'-5' domain-containing protein 2 OS=Homo sapiens OX=9606 GN=EXD2 PE=1 SV=2	100	0	NP_001180289.1	exonuclease 3'-5' domain-containing protein 2 isoform 1 [Homo sapiens]
Q9BVS5	case1-VS-control	-1.76414	0.187087	-9.42951	7	3.15e-05	0.000129511	Down	Q9BVS5	tRNA (adenine(58)-N(1))-methyltransferase, mitochondrial OS=Homo sapiens OX=9606 GN=TRMT61B PE=1 SV=2	100	0	NP_060380.3	tRNA (adenine(58)-N(1))-methyltransferase, mitochondrial precursor [Homo sapiens]
P24941	case1-VS-control	1.31783	0.157499	8.36721	8	3.16e-05	0.000129804	Up	P24941	Cyclin-dependent kinase 2 OS=Homo sapiens OX=9606 GN=CDK2 PE=1 SV=2	100	0	NP_001789.2	cyclin-dependent kinase 2 isoform 1 [Homo sapiens]
Q92572	case1-VS-control	3.61572	0.326683	11.068	6	3.24e-05	0.000132984	Up	Q92572	AP-3 complex subunit sigma-1 OS=Homo sapiens OX=9606 GN=AP3S1 PE=1 SV=1	100	7e-141	XP_012514992.1	PREDICTED: AP-3 complex subunit sigma-1 [Propithecus coquereli]
Q9H3U5	case1-VS-control	-1.60963	0.193064	-8.33728	8	3.24e-05	0.000132984	Down	Q9H3U5	Major facilitator superfamily domain-containing protein 1 OS=Homo sapiens OX=9606 GN=MFSD1 PE=2 SV=2	100	0	NP_073573.2	major facilitator superfamily domain-containing protein 1 isoform 1 [Homo sapiens]
O75390	case1-VS-control	-0.929843	0.111579	-8.3335	8	3.25e-05	0.000133303	None	O75390	Citrate synthase, mitochondrial OS=Homo sapiens OX=9606 GN=CS PE=1 SV=2	100	0	NP_004068.2	citrate synthase, mitochondrial precursor [Homo sapiens]
Q96MU7	case1-VS-control	0.436957	0.0525297	8.31828	8	3.29e-05	0.000134877	None	Q96MU7	YTH domain-containing protein 1 OS=Homo sapiens OX=9606 GN=YTHDC1 PE=1 SV=3	100	0	NP_001026902.1	YTH domain-containing protein 1 isoform 1 [Homo sapiens]
Q99729	case1-VS-control	-0.925845	0.111307	-8.31796	8	3.3e-05	0.000134877	None	Q99729	Heterogeneous nuclear ribonucleoprotein A/B OS=Homo sapiens OX=9606 GN=HNRNPAB PE=1 SV=2	100	0	Q99729.2	RecName: Full=Heterogeneous nuclear ribonucleoprotein A/B; Short=hnRNP A/B; AltName: Full=APOBEC1-binding protein 1; Short=ABBP-1
Q01415	case1-VS-control	3.07726	0.328923	9.35556	7	3.31e-05	0.000135501	Up	Q01415	N-acetylgalactosamine kinase OS=Homo sapiens OX=9606 GN=GALK2 PE=1 SV=1	100	0	NP_002035.1	N-acetylgalactosamine kinase isoform 1 [Homo sapiens]
P49720	case1-VS-control	2.02707	0.243936	8.30985	8	3.32e-05	0.000135591	Up	P49720	Proteasome subunit beta type-3 OS=Homo sapiens OX=9606 GN=PSMB3 PE=1 SV=2	100	1e-152	NP_002786.2	proteasome subunit beta type-3 [Homo sapiens]
P50443	case1-VS-control	-1.76691	0.189208	-9.33845	7	3.35e-05	0.000136868	Down	P50443	Sulfate transporter OS=Homo sapiens OX=9606 GN=SLC26A2 PE=1 SV=2	100	0	NP_000103.2	sulfate transporter [Homo sapiens]
Q9BYT8	case1-VS-control	-0.916684	0.110483	-8.29706	8	3.36e-05	0.000136868	None	Q9BYT8	Neurolysin, mitochondrial OS=Homo sapiens OX=9606 GN=NLN PE=1 SV=1	100	0	NP_065777.1	neurolysin, mitochondrial [Homo sapiens]
Q9C0D9	case1-VS-control	-1.02669	0.123812	-8.29235	8	3.37e-05	0.00013731	Down	Q9C0D9	Ethanolaminephosphotransferase 1 OS=Homo sapiens OX=9606 GN=SELENOI PE=1 SV=3	100	0	NP_277040.1	ethanolaminephosphotransferase 1 [Homo sapiens]
O15160	case1-VS-control	0.957176	0.11545	8.29085	8	3.37e-05	0.000137368	None	O15160	DNA-directed RNA polymerases I and III subunit RPAC1 OS=Homo sapiens OX=9606 GN=POLR1C PE=1 SV=1	100	0	NP_976035.1	DNA-directed RNA polymerases I and III subunit RPAC1 isoform 1 [Homo sapiens]
P51398	case1-VS-control	-1.14288	0.137917	-8.28669	8	3.39e-05	0.000137627	Down	P51398	28S ribosomal protein S29, mitochondrial OS=Homo sapiens OX=9606 GN=DAP3 PE=1 SV=1	100	0	NP_004623.1	28S ribosomal protein S29, mitochondrial isoform 1 [Homo sapiens]
P82914	case1-VS-control	-1.79523	0.216641	-8.28665	8	3.39e-05	0.000137627	Down	P82914	28S ribosomal protein S15, mitochondrial OS=Homo sapiens OX=9606 GN=MRPS15 PE=1 SV=1	100	0	NP_112570.2	28S ribosomal protein S15, mitochondrial [Homo sapiens]
Q9H5X1	case1-VS-control	2.41338	0.21983	10.9784	6	3.39e-05	0.000137795	Up	Q9H5X1	Cytosolic iron-sulfur assembly component 2A OS=Homo sapiens OX=9606 GN=CIAO2A PE=1 SV=1	100	6e-113	NP_115607.1	MIP18 family protein FAM96A isoform a precursor [Homo sapiens]
Q92599	case1-VS-control	-3.21806	0.157732	-20.402	4	3.41e-05	0.000138148	Down	Q92599	Septin-8 OS=Homo sapiens OX=9606 GN=SEPT8 PE=1 SV=4	100	0	NP_001092281.1	septin-8 isoform a [Homo sapiens]
Q9NYY8	case1-VS-control	-0.766817	0.0926188	-8.27928	8	3.41e-05	0.000138148	None	Q9NYY8	FAST kinase domain-containing protein 2, mitochondrial OS=Homo sapiens OX=9606 GN=FASTKD2 PE=1 SV=1	100	0	NP_055744.2	FAST kinase domain-containing protein 2, mitochondrial [Homo sapiens]
Q99832	case1-VS-control	1.27684	0.154302	8.27495	8	3.42e-05	0.000138549	Up	Q99832	T-complex protein 1 subunit eta OS=Homo sapiens OX=9606 GN=CCT7 PE=1 SV=2	100	0	NP_006420.1	T-complex protein 1 subunit eta isoform a [Homo sapiens]
Q96JM3	case1-VS-control	-1.73695	0.209979	-8.27201	8	3.43e-05	0.00013878	Down	Q96JM3	Chromosome alignment-maintaining phosphoprotein 1 OS=Homo sapiens OX=9606 GN=CHAMP1 PE=1 SV=2	100	0	NP_115812.1	chromosome alignment-maintaining phosphoprotein 1 [Homo sapiens]
Q9Y2X3	case1-VS-control	-0.712983	0.0862025	-8.27103	8	3.43e-05	0.00013878	None	Q9Y2X3	Nucleolar protein 58 OS=Homo sapiens OX=9606 GN=NOP58 PE=1 SV=1	100	0	NP_057018.1	nucleolar protein 58 [Homo sapiens]
Q96D05	case1-VS-control	-0.779191	0.0942459	-8.26764	8	3.44e-05	0.000139069	None	Q96D05	Uncharacterized protein FAM241B OS=Homo sapiens OX=9606 GN=FAM241B PE=1 SV=1	100	1e-81	XP_001169572.1	PREDICTED: uncharacterized protein C10orf35 homolog isoform X1 [Pan troglodytes]
P82930	case1-VS-control	-1.25841	0.152258	-8.26501	8	3.45e-05	0.000139143	Down	P82930	28S ribosomal protein S34, mitochondrial OS=Homo sapiens OX=9606 GN=MRPS34 PE=1 SV=2	100	1e-158	NP_076425.1	28S ribosomal protein S34, mitochondrial isoform 2 [Homo sapiens]
Q8WTT2	case1-VS-control	-1.10385	0.133549	-8.26548	8	3.45e-05	0.000139143	Down	Q8WTT2	Nucleolar complex protein 3 homolog OS=Homo sapiens OX=9606 GN=NOC3L PE=1 SV=1	100	0	NP_071896.8	nucleolar complex protein 3 homolog [Homo sapiens]
Q9NPA0	case1-VS-control	-1.54778	0.187401	-8.25919	8	3.47e-05	0.000139731	Down	Q9NPA0	ER membrane protein complex subunit 7 OS=Homo sapiens OX=9606 GN=EMC7 PE=1 SV=1	100	5e-175	NP_064539.1	ER membrane protein complex subunit 7 precursor [Homo sapiens]
Q92667	case1-VS-control	-1.36541	0.165377	-8.25638	8	3.48e-05	0.000139953	Down	Q92667	A-kinase anchor protein 1, mitochondrial OS=Homo sapiens OX=9606 GN=AKAP1 PE=1 SV=1	100	0	NP_003479.1	A-kinase anchor protein 1, mitochondrial precursor [Homo sapiens]
P61163	case1-VS-control	-1.19615	0.144973	-8.2508	8	3.49e-05	0.000140515	Down	P61163	Alpha-centractin OS=Homo sapiens OX=9606 GN=ACTR1A PE=1 SV=1	100	0	XP_008567934.1	PREDICTED: alpha-centractin isoform X1 [Galeopterus variegatus]
P06744	case1-VS-control	2.98705	0.362105	8.24915	8	3.5e-05	0.000140595	Up	P06744	Glucose-6-phosphate isomerase OS=Homo sapiens OX=9606 GN=GPI PE=1 SV=4	100	0	NP_001276718.1	glucose-6-phosphate isomerase isoform 3 [Homo sapiens]
Q13427	case1-VS-control	-1.38258	0.167664	-8.24616	8	3.51e-05	0.000140841	Down	Q13427	Peptidyl-prolyl cis-trans isomerase G OS=Homo sapiens OX=9606 GN=PPIG PE=1 SV=2	100	0	NP_004783.2	peptidyl-prolyl cis-trans isomerase G [Homo sapiens]
P47756	case1-VS-control	1.05263	0.127773	8.23832	8	3.53e-05	0.000141689	Up	P47756	F-actin-capping protein subunit beta OS=Homo sapiens OX=9606 GN=CAPZB PE=1 SV=4	100	0	NP_001193469.1	F-actin-capping protein subunit beta isoform 2 [Homo sapiens]
Q96FV9	case1-VS-control	-1.05046	0.127674	-8.2277	8	3.57e-05	0.000142893	Down	Q96FV9	THO complex subunit 1 OS=Homo sapiens OX=9606 GN=THOC1 PE=1 SV=1	100	0	NP_005122.2	THO complex subunit 1 [Homo sapiens]
Q15019	case1-VS-control	-1.2707	0.154521	-8.22349	8	3.58e-05	0.000143172	Down	Q15019	Septin-2 OS=Homo sapiens OX=9606 GN=SEPT2 PE=1 SV=1	100	0	NP_004395.1	septin-2 isoform a [Homo sapiens]
Q86Y56	case1-VS-control	2.53286	0.307966	8.22446	8	3.58e-05	0.000143172	Up	Q86Y56	Dynein assembly factor 5, axonemal OS=Homo sapiens OX=9606 GN=DNAAF5 PE=1 SV=4	100	0	NP_060272.3	dynein assembly factor 5, axonemal [Homo sapiens]
Q9H6U8	case1-VS-control	-1.21311	0.147719	-8.21226	8	3.61e-05	0.000144468	Down	Q9H6U8	Alpha-1,2-mannosyltransferase ALG9 OS=Homo sapiens OX=9606 GN=ALG9 PE=1 SV=2	100	0	NP_001071158.1	alpha-1,2-mannosyltransferase ALG9 isoform b [Homo sapiens]
Q9Y2D0	case1-VS-control	3.72282	0.403366	9.22938	7	3.62e-05	0.000144568	Up	Q9Y2D0	Carbonic anhydrase 5B, mitochondrial OS=Homo sapiens OX=9606 GN=CA5B PE=1 SV=1	100	0	NP_009151.1	carbonic anhydrase 5B, mitochondrial precursor [Homo sapiens]
O75525	case1-VS-control	-0.914245	0.111386	-8.20793	8	3.63e-05	0.000144766	None	O75525;Q07666;Q5VWX1	KH domain-containing, RNA-binding, signal transduction-associated protein 3 OS=Homo sapiens OX=9606 GN=KHDRBS3 PE=1 SV=1	100	0	NP_006549.1	KH domain-containing, RNA-binding, signal transduction-associated protein 3 [Homo sapiens]
Q6PID6	case1-VS-control	1.95126	0.141766	13.7639	5	3.63e-05	0.000144836	Up	Q6PID6	Tetratricopeptide repeat protein 33 OS=Homo sapiens OX=9606 GN=TTC33 PE=1 SV=2	100	0	NP_036514.1	tetratricopeptide repeat protein 33 [Homo sapiens]
P62906	case1-VS-control	1.11108	0.135444	8.20319	8	3.64e-05	0.000145119	Up	P62906	60S ribosomal protein L10a OS=Homo sapiens OX=9606 GN=RPL10A PE=1 SV=2	100	4e-159	NP_112327.1	60S ribosomal protein L10a [Rattus norvegicus]
O00571	case1-VS-control	1.46161	0.178267	8.19899	8	3.66e-05	0.000145403	Up	O00571	ATP-dependent RNA helicase DDX3X OS=Homo sapiens OX=9606 GN=DDX3X PE=1 SV=3	100	0	BAD92220.1	DEAD/H (Asp-Glu-Ala-Asp/His) box polypeptide 3 variant, partial [Homo sapiens]
Q86XI2	case1-VS-control	-1.39509	0.170145	-8.19938	8	3.66e-05	0.000145403	Down	Q86XI2	Condensin-2 complex subunit G2 OS=Homo sapiens OX=9606 GN=NCAPG2 PE=1 SV=1	100	0	NP_060230.5	condensin-2 complex subunit G2 isoform a [Homo sapiens]
P62249	case1-VS-control	1.70343	0.207801	8.19743	8	3.66e-05	0.000145477	Up	P62249	40S ribosomal protein S16 OS=Homo sapiens OX=9606 GN=RPS16 PE=1 SV=2	100	3e-102	XP_003915560.1	40S ribosomal protein S16 [Papio anubis]
Q00653	case1-VS-control	3.64211	0.0220739	164.996	2	3.67e-05	0.000145772	Up	Q00653	Nuclear factor NF-kappa-B p100 subunit OS=Homo sapiens OX=9606 GN=NFKB2 PE=1 SV=4	100	0	NP_001070962.1	nuclear factor NF-kappa-B p100 subunit isoform a [Homo sapiens]
O00487	case1-VS-control	1.38576	0.169201	8.19002	8	3.69e-05	0.000146177	Up	O00487	26S proteasome non-ATPase regulatory subunit 14 OS=Homo sapiens OX=9606 GN=PSMD14 PE=1 SV=1	100	0	NP_005796.1	26S proteasome non-ATPase regulatory subunit 14 [Homo sapiens]
O00178	case1-VS-control	1.05235	0.128533	8.18738	8	3.7e-05	0.00014639	Up	O00178	GTP-binding protein 1 OS=Homo sapiens OX=9606 GN=GTPBP1 PE=1 SV=3	100	0	NP_004277.2	GTP-binding protein 1 [Homo sapiens]
Q92598	case1-VS-control	2.09809	0.256462	8.1809	8	3.72e-05	0.000147103	Up	Q92598	Heat shock protein 105 kDa OS=Homo sapiens OX=9606 GN=HSPH1 PE=1 SV=1	100	0	NP_006635.2	heat shock protein 105 kDa isoform 1 [Homo sapiens]
Q15020	case1-VS-control	1.39968	0.171206	8.17539	8	3.73e-05	0.000147692	Up	Q15020	Squamous cell carcinoma antigen recognized by T-cells 3 OS=Homo sapiens OX=9606 GN=SART3 PE=1 SV=1	100	0	NP_055521.1	squamous cell carcinoma antigen recognized by T-cells 3 [Homo sapiens]
P82933	case1-VS-control	-1.4146	0.173058	-8.17413	8	3.74e-05	0.00014773	Down	P82933	28S ribosomal protein S9, mitochondrial OS=Homo sapiens OX=9606 GN=MRPS9 PE=1 SV=2	100	0	NP_872578.1	28S ribosomal protein S9, mitochondrial [Homo sapiens]
Q9Y6I9	case1-VS-control	-2.39028	0.292491	-8.17215	8	3.75e-05	0.00014786	Down	Q9Y6I9	Testis-expressed protein 264 OS=Homo sapiens OX=9606 GN=TEX264 PE=1 SV=1	100	0	NP_057010.1	testis-expressed protein 264 isoform 1 precursor [Homo sapiens]
Q969J3	case1-VS-control	1.25531	0.136834	9.17395	7	3.77e-05	0.000148543	Up	Q969J3	BLOC-1-related complex subunit 5 OS=Homo sapiens OX=9606 GN=BORCS5 PE=1 SV=1	100	2e-142	NP_477517.1	BLOC-1-related complex subunit 5 isoform 1 [Homo sapiens]
Q9HAV4	case1-VS-control	1.55307	0.190317	8.16044	8	3.78e-05	0.000149142	Up	Q9HAV4	Exportin-5 OS=Homo sapiens OX=9606 GN=XPO5 PE=1 SV=1	100	0	NP_065801.1	exportin-5 [Homo sapiens]
P30046	case1-VS-control	4.60974	0.565058	8.15799	8	3.79e-05	0.000149337	Up	P30046	D-dopachrome decarboxylase OS=Homo sapiens OX=9606 GN=DDT PE=1 SV=3	100	9e-82	NP_001346.1	D-dopachrome decarboxylase [Homo sapiens]
Q86VX2	case1-VS-control	1.8426	0.225893	8.15694	8	3.8e-05	0.000149347	Up	Q86VX2	COMM domain-containing protein 7 OS=Homo sapiens OX=9606 GN=COMMD7 PE=1 SV=2	100	4e-146	NP_444269.2	COMM domain-containing protein 7 isoform 1 [Homo sapiens]
O95295	case1-VS-control	1.7451	0.214	8.15469	8	3.8e-05	0.000149515	Up	O95295	SNARE-associated protein Snapin OS=Homo sapiens OX=9606 GN=SNAPIN PE=1 SV=1	100	2e-94	NP_036569.1	SNARE-associated protein Snapin [Homo sapiens]
Q9C0E8	case1-VS-control	-2.05969	0.252762	-8.14872	8	3.82e-05	0.000150179	Down	Q9C0E8	Endoplasmic reticulum junction formation protein lunapark OS=Homo sapiens OX=9606 GN=LNPK PE=1 SV=2	100	0	NP_085153.1	protein lunapark isoform 4 [Homo sapiens]
P04075	case1-VS-control	1.31003	0.160847	8.14458	8	3.84e-05	0.000150603	Up	P04075	Fructose-bisphosphate aldolase A OS=Homo sapiens OX=9606 GN=ALDOA PE=1 SV=2	100	0	NP_001230106.1	fructose-bisphosphate aldolase A isoform 2 [Homo sapiens]
Q9HCU5	case1-VS-control	-1.21467	0.149216	-8.14037	8	3.85e-05	0.000151036	Down	Q9HCU5	Prolactin regulatory element-binding protein OS=Homo sapiens OX=9606 GN=PREB PE=1 SV=2	100	0	NP_037520.1	prolactin regulatory element-binding protein isoform 1 [Homo sapiens]
Q01130	case1-VS-control	1.76666	0.217238	8.13238	8	3.88e-05	0.000151849	Up	Q01130	Serine/arginine-rich splicing factor 2 OS=Homo sapiens OX=9606 GN=SRSF2 PE=1 SV=4	100	6e-142	NP_035488.1	serine/arginine-rich splicing factor 2 [Mus musculus]
Q96GQ5	case1-VS-control	-1.69366	0.208239	-8.13326	8	3.88e-05	0.000151849	Down	Q96GQ5	RUS1 family protein C16orf58 OS=Homo sapiens OX=9606 GN=C16orf58 PE=1 SV=2	100	0	NP_073581.2	RUS1 family protein C16orf58 [Homo sapiens]
Q8NE86	case1-VS-control	1.20749	0.148755	8.11734	8	3.93e-05	0.000153761	Up	Q8NE86	Calcium uniporter protein, mitochondrial OS=Homo sapiens OX=9606 GN=MCU PE=1 SV=1	100	0	NP_612366.1	calcium uniporter protein, mitochondrial isoform 1 precursor [Homo sapiens]
Q32MZ4	case1-VS-control	1.70957	0.210776	8.11086	8	3.95e-05	0.000154517	Up	Q32MZ4	Leucine-rich repeat flightless-interacting protein 1 OS=Homo sapiens OX=9606 GN=LRRFIP1 PE=1 SV=2	100	0	NP_001131024.1	leucine-rich repeat flightless-interacting protein 1 isoform 3 [Homo sapiens]
P40926	case1-VS-control	-0.814721	0.100499	-8.10674	8	3.97e-05	0.000154902	None	P40926	Malate dehydrogenase, mitochondrial OS=Homo sapiens OX=9606 GN=MDH2 PE=1 SV=3	100	0	NP_005909.2	malate dehydrogenase, mitochondrial isoform 1 precursor [Homo sapiens]
Q9Y5W9	case1-VS-control	-1.44137	0.177812	-8.10614	8	3.97e-05	0.000154902	Down	Q9Y5W9	Sorting nexin-11 OS=Homo sapiens OX=9606 GN=SNX11 PE=1 SV=2	100	0	NP_037455.2	sorting nexin-11 isoform 1 [Homo sapiens]
Q14914	case1-VS-control	4.3312	0.534387	8.105	8	3.98e-05	0.000154927	Up	Q14914	Prostaglandin reductase 1 OS=Homo sapiens OX=9606 GN=PTGR1 PE=1 SV=2	100	0	NP_036344.2	prostaglandin reductase 1 isoform 1 [Homo sapiens]
Q5VT52	case1-VS-control	-0.716737	0.0884856	-8.10005	8	3.99e-05	0.000155479	None	Q5VT52	Regulation of nuclear pre-mRNA domain-containing protein 2 OS=Homo sapiens OX=9606 GN=RPRD2 PE=1 SV=1	100	0	NP_056018.2	regulation of nuclear pre-mRNA domain-containing protein 2 isoform 1 [Homo sapiens]
Q9NQW7	case1-VS-control	3.99328	0.493749	8.08767	8	4.04e-05	0.000157071	Up	Q9NQW7	Xaa-Pro aminopeptidase 1 OS=Homo sapiens OX=9606 GN=XPNPEP1 PE=1 SV=3	100	0	NP_001311065.1	xaa-Pro aminopeptidase 1 isoform 9 [Homo sapiens]
P53041	case1-VS-control	3.2	0.39579	8.08509	8	4.05e-05	0.000157298	Up	P53041	Serine/threonine-protein phosphatase 5 OS=Homo sapiens OX=9606 GN=PPP5C PE=1 SV=1	100	0	NP_006238.1	serine/threonine-protein phosphatase 5 isoform 1 [Homo sapiens]
Q9BW27	case1-VS-control	-1.36327	0.168789	-8.07678	8	4.08e-05	0.000158333	Down	Q9BW27	Nuclear pore complex protein Nup85 OS=Homo sapiens OX=9606 GN=NUP85 PE=1 SV=1	100	0	CAD38749.1	hypothetical protein, partial [Homo sapiens]
Q15717	case1-VS-control	-0.913356	0.113143	-8.07258	8	4.09e-05	0.000158793	None	Q15717	ELAV-like protein 1 OS=Homo sapiens OX=9606 GN=ELAVL1 PE=1 SV=2	100	0	NP_001410.2	ELAV-like protein 1 [Homo sapiens]
O60613	case1-VS-control	-2.22748	0.276151	-8.06617	8	4.12e-05	0.00015957	Down	O60613	Selenoprotein F OS=Homo sapiens OX=9606 GN=SELENOF PE=1 SV=4	100	1e-114	NP_004252.2	selenoprotein F isoform 1 precursor [Homo sapiens]
P00533	case1-VS-control	0.60119	0.0746067	8.05812	8	4.14e-05	0.000160586	None	P00533	Epidermal growth factor receptor OS=Homo sapiens OX=9606 GN=EGFR PE=1 SV=2	100	0	NP_005219.2	epidermal growth factor receptor isoform a precursor [Homo sapiens]
Q8TAE8	case1-VS-control	-1.27105	0.157851	-8.05219	8	4.17e-05	0.000161167	Down	Q8TAE8	Growth arrest and DNA damage-inducible proteins-interacting protein 1 OS=Homo sapiens OX=9606 GN=GADD45GIP1 PE=1 SV=1	100	8e-154	NP_443082.2	growth arrest and DNA damage-inducible proteins-interacting protein 1 [Homo sapiens]
Q9H6T3	case1-VS-control	2.07337	0.257482	8.05249	8	4.17e-05	0.000161167	Up	Q9H6T3	RNA polymerase II-associated protein 3 OS=Homo sapiens OX=9606 GN=RPAP3 PE=1 SV=2	100	0	NP_078880.2	RNA polymerase II-associated protein 3 isoform 1 [Homo sapiens]
Q53FV1	case1-VS-control	-1.85631	0.230664	-8.0477	8	4.18e-05	0.000161679	Down	Q53FV1;Q9P0S3	ORM1-like protein 2 OS=Homo sapiens OX=9606 GN=ORMDL2 PE=1 SV=2	100	3e-108	NP_054901.1	ORM1-like protein 2 [Homo sapiens]
Q8N1S5	case1-VS-control	-2.3524	0.222293	-10.5824	6	4.19e-05	0.000161794	Down	Q8N1S5	Zinc transporter ZIP11 OS=Homo sapiens OX=9606 GN=SLC39A11 PE=2 SV=3	100	0	NP_001153242.1	zinc transporter ZIP11 isoform 1 [Homo sapiens]
O75879	case1-VS-control	-1.50528	0.187307	-8.03645	8	4.23e-05	0.00016304	Down	O75879	Glutamyl-tRNA(Gln) amidotransferase subunit B, mitochondrial OS=Homo sapiens OX=9606 GN=GATB PE=1 SV=1	100	0	NP_004555.1	glutamyl-tRNA(Gln) amidotransferase subunit B, mitochondrial precursor [Homo sapiens]
O14744	case1-VS-control	2.97982	0.370878	8.03449	8	4.23e-05	0.000163134	Up	O14744	Protein arginine N-methyltransferase 5 OS=Homo sapiens OX=9606 GN=PRMT5 PE=1 SV=4	100	0	XP_005560876.1	PREDICTED: protein arginine N-methyltransferase 5 isoform X1 [Macaca fascicularis]
P36404	case1-VS-control	1.07324	0.133589	8.03392	8	4.24e-05	0.000163134	Up	P36404	ADP-ribosylation factor-like protein 2 OS=Homo sapiens OX=9606 GN=ARL2 PE=1 SV=4	100	2e-132	NP_001658.2	ADP-ribosylation factor-like protein 2 isoform 1 [Homo sapiens]
O00567	case1-VS-control	-1.02054	0.127065	-8.03161	8	4.24e-05	0.000163335	Down	O00567	Nucleolar protein 56 OS=Homo sapiens OX=9606 GN=NOP56 PE=1 SV=4	100	0	NP_006383.2	nucleolar protein 56 [Homo sapiens]
Q5T1V6	case1-VS-control	1.92605	0.240071	8.02282	8	4.28e-05	0.000164489	Up	Q5T1V6	Probable ATP-dependent RNA helicase DDX59 OS=Homo sapiens OX=9606 GN=DDX59 PE=1 SV=1	100	0	NP_001026895.2	probable ATP-dependent RNA helicase DDX59 isoform 1 [Homo sapiens]
Q9NZM1	case1-VS-control	0.713237	0.0889317	8.02005	8	4.29e-05	0.00016476	None	Q9NZM1	Myoferlin OS=Homo sapiens OX=9606 GN=MYOF PE=1 SV=1	100	0	NP_038479.1	myoferlin isoform a [Homo sapiens]
P62316	case1-VS-control	-0.814223	0.101558	-8.01732	8	4.3e-05	0.000165026	None	P62316	Small nuclear ribonucleoprotein Sm D2 OS=Homo sapiens OX=9606 GN=SNRPD2 PE=1 SV=1	100	7e-81	XP_014926202.1	PREDICTED: small nuclear ribonucleoprotein Sm D2 [Acinonyx jubatus]
P52943	case1-VS-control	-0.637039	0.079485	-8.01458	8	4.31e-05	0.000165293	None	P52943	Cysteine-rich protein 2 OS=Homo sapiens OX=9606 GN=CRIP2 PE=1 SV=1	100	8e-151	NP_001303.1	cysteine-rich protein 2 isoform 1 [Homo sapiens]
P41223	case1-VS-control	-0.756047	0.0944165	-8.00757	8	4.34e-05	0.000166199	None	P41223	Protein BUD31 homolog OS=Homo sapiens OX=9606 GN=BUD31 PE=1 SV=2	100	8e-104	EPQ13692.1	Protein BUD31 like protein [Myotis brandtii]
P63261	case1-VS-control	0.588918	0.0735996	8.00165	8	4.36e-05	0.000166776	None	P63261	Actin, cytoplasmic 2 OS=Homo sapiens OX=9606 GN=ACTG1 PE=1 SV=1	100	0	XP_011815463.1	PREDICTED: actin, cytoplasmic 2 isoform X1 [Colobus angolensis palliatus]
Q14146	case1-VS-control	-1.28911	0.161121	-8.00091	8	4.36e-05	0.000166776	Down	Q14146	Unhealthy ribosome biogenesis protein 2 homolog OS=Homo sapiens OX=9606 GN=URB2 PE=2 SV=2	100	0	NP_055592.2	unhealthy ribosome biogenesis protein 2 homolog [Homo sapiens]
Q6DD88	case1-VS-control	-0.796401	0.099525	-8.00202	8	4.36e-05	0.000166776	None	Q6DD88	Atlastin-3 OS=Homo sapiens OX=9606 GN=ATL3 PE=1 SV=1	100	0	NP_056274.3	atlastin-3 isoform 1 [Homo sapiens]
O14579	case1-VS-control	1.73434	0.216797	7.99983	8	4.37e-05	0.000166799	Up	O14579	Coatomer subunit epsilon OS=Homo sapiens OX=9606 GN=COPE PE=1 SV=3	100	0	NP_009194.2	coatomer subunit epsilon isoform a [Homo sapiens]
Q9Y3B4	case1-VS-control	-0.812488	0.101598	-7.99712	8	4.38e-05	0.000167066	None	Q9Y3B4	Splicing factor 3B subunit 6 OS=Homo sapiens OX=9606 GN=SF3B6 PE=1 SV=1	100	3e-88	NP_057131.1	splicing factor 3B subunit 6 [Homo sapiens]
P67812	case1-VS-control	-0.911535	0.114015	-7.99485	8	4.39e-05	0.000167269	None	P67812	Signal peptidase complex catalytic subunit SEC11A OS=Homo sapiens OX=9606 GN=SEC11A PE=1 SV=1	100	7e-128	XP_014444976.1	PREDICTED: signal peptidase complex catalytic subunit SEC11A [Tupaia chinensis]
O95983	case1-VS-control	-1.12494	0.140789	-7.99027	8	4.41e-05	0.000167415	Down	O95983	Methyl-CpG-binding domain protein 3 OS=Homo sapiens OX=9606 GN=MBD3 PE=1 SV=1	100	0	NP_001268382.1	methyl-CpG-binding domain protein 3 isoform 1 [Homo sapiens]
P52788	case1-VS-control	4.38021	0.548122	7.9913	8	4.4e-05	0.000167415	Up	P52788	Spermine synthase OS=Homo sapiens OX=9606 GN=SMS PE=1 SV=2	100	0	NP_004586.2	spermine synthase isoform 1 [Homo sapiens]
Q13501	case1-VS-control	1.10841	0.138695	7.99174	8	4.4e-05	0.000167415	Up	Q13501	Sequestosome-1 OS=Homo sapiens OX=9606 GN=SQSTM1 PE=1 SV=1	100	0	NP_003891.1	sequestosome-1 isoform 1 [Homo sapiens]
Q9UI12	case1-VS-control	-0.935285	0.117055	-7.99017	8	4.41e-05	0.000167415	None	Q9UI12	V-type proton ATPase subunit H OS=Homo sapiens OX=9606 GN=ATP6V1H PE=1 SV=1	100	0	NP_998785.1	V-type proton ATPase subunit H isoform 1 [Homo sapiens]
A2RRP1	case1-VS-control	-0.726136	0.0909238	-7.9862	8	4.42e-05	0.000167595	None	A2RRP1	Neuroblastoma-amplified sequence OS=Homo sapiens OX=9606 GN=NBAS PE=1 SV=2	100	0	NP_056993.2	neuroblastoma-amplified sequence [Homo sapiens]
P17987	case1-VS-control	1.42974	0.179025	7.98627	8	4.42e-05	0.000167595	Up	P17987	T-complex protein 1 subunit alpha OS=Homo sapiens OX=9606 GN=TCP1 PE=1 SV=1	100	0	NP_110379.2	T-complex protein 1 subunit alpha isoform a [Homo sapiens]
Q49B96	case1-VS-control	-0.775786	0.0971246	-7.98753	8	4.42e-05	0.000167595	None	Q49B96	Cytochrome c oxidase assembly protein COX19 OS=Homo sapiens OX=9606 GN=COX19 PE=1 SV=1	100	2e-59	NP_001026788.1	cytochrome c oxidase assembly protein COX19 [Homo sapiens]
P28066	case1-VS-control	2.21526	0.277467	7.98388	8	4.43e-05	0.000167668	Up	P28066	Proteasome subunit alpha type-5 OS=Homo sapiens OX=9606 GN=PSMA5 PE=1 SV=3	100	4e-179	NP_036097.1	proteasome subunit alpha type-5 [Mus musculus]
Q9Y508	case1-VS-control	1.78033	0.198971	8.9477	7	4.43e-05	0.000167668	Up	Q9Y508	E3 ubiquitin-protein ligase RNF114 OS=Homo sapiens OX=9606 GN=RNF114 PE=1 SV=1	100	2e-171	NP_061153.1	E3 ubiquitin-protein ligase RNF114 [Homo sapiens]
P62244	case1-VS-control	1.81209	0.22703	7.98172	8	4.44e-05	0.000167854	Up	P62244	40S ribosomal protein S15a OS=Homo sapiens OX=9606 GN=RPS15A PE=1 SV=2	99.231	3e-92	XP_003642170.2	PREDICTED: 40S ribosomal protein S15a isoform X1 [Gallus gallus]
Q9UMS4	case1-VS-control	-0.476865	0.0597646	-7.97906	8	4.45e-05	0.000168118	None	Q9UMS4	Pre-mRNA-processing factor 19 OS=Homo sapiens OX=9606 GN=PRPF19 PE=1 SV=1	100	0	NP_055317.1	pre-mRNA-processing factor 19 [Homo sapiens]
Q96EY8	case1-VS-control	-1.02288	0.128216	-7.97774	8	4.46e-05	0.00016818	Down	Q96EY8	Cob(I)yrinic acid a,c-diamide adenosyltransferase, mitochondrial OS=Homo sapiens OX=9606 GN=MMAB PE=1 SV=1	100	0	NP_443077.1	cob(I)yrinic acid a,c-diamide adenosyltransferase, mitochondrial precursor [Homo sapiens]
P47755	case1-VS-control	0.73271	0.0918721	7.97533	8	4.46e-05	0.000168406	None	P47755	F-actin-capping protein subunit alpha-2 OS=Homo sapiens OX=9606 GN=CAPZA2 PE=1 SV=3	100	0	NP_006127.1	F-actin-capping protein subunit alpha-2 [Homo sapiens]
Q16850	case1-VS-control	-0.770927	0.096689	-7.97326	8	4.47e-05	0.00016858	None	Q16850	Lanosterol 14-alpha demethylase OS=Homo sapiens OX=9606 GN=CYP51A1 PE=1 SV=3	100	0	NP_000777.1	lanosterol 14-alpha demethylase isoform 1 precursor [Homo sapiens]
Q9H4L4	case1-VS-control	-1.16952	0.146747	-7.96963	8	4.49e-05	0.000168995	Down	Q9H4L4	Sentrin-specific protease 3 OS=Homo sapiens OX=9606 GN=SENP3 PE=1 SV=2	100	0	NP_056485.2	sentrin-specific protease 3 [Homo sapiens]
Q8IWA0	case1-VS-control	-1.06629	0.133822	-7.968	8	4.49e-05	0.000169104	Down	Q8IWA0	WD repeat-containing protein 75 OS=Homo sapiens OX=9606 GN=WDR75 PE=1 SV=1	100	0	NP_115544.1	WD repeat-containing protein 75 isoform 1 [Homo sapiens]
Q9NUU7	case1-VS-control	1.17518	0.147607	7.96158	8	4.52e-05	0.000169946	Up	Q9NUU7	ATP-dependent RNA helicase DDX19A OS=Homo sapiens OX=9606 GN=DDX19A PE=1 SV=1	100	0	NP_060802.1	ATP-dependent RNA helicase DDX19A isoform 1 [Homo sapiens]
O60716	case1-VS-control	-1.74926	0.219937	-7.95344	8	4.55e-05	0.000170639	Down	O60716	Catenin delta-1 OS=Homo sapiens OX=9606 GN=CTNND1 PE=1 SV=1	100	0	NP_001078927.1	catenin delta-1 isoform 1ABC [Homo sapiens]
Q15813	case1-VS-control	2.6806	0.337016	7.95393	8	4.55e-05	0.000170639	Up	Q15813	Tubulin-specific chaperone E OS=Homo sapiens OX=9606 GN=TBCE PE=1 SV=1	100	0	NP_003184.1	tubulin-specific chaperone E isoform a [Homo sapiens]
Q9NQG5	case1-VS-control	-0.715427	0.0899326	-7.95515	8	4.55e-05	0.000170639	None	Q9NQG5	Regulation of nuclear pre-mRNA domain-containing protein 1B OS=Homo sapiens OX=9606 GN=RPRD1B PE=1 SV=1	100	0	NP_067038.1	regulation of nuclear pre-mRNA domain-containing protein 1B [Homo sapiens]
Q9Y2G5	case1-VS-control	-2.67598	0.256499	-10.4327	6	4.55e-05	0.000170639	Down	Q9Y2G5	GDP-fucose protein O-fucosyltransferase 2 OS=Homo sapiens OX=9606 GN=POFUT2 PE=1 SV=3	100	0	NP_598368.2	GDP-fucose protein O-fucosyltransferase 2 isoform C precursor [Homo sapiens]
P29144	case1-VS-control	3.91707	0.492682	7.95052	8	4.57e-05	0.000170949	Up	P29144	Tripeptidyl-peptidase 2 OS=Homo sapiens OX=9606 GN=TPP2 PE=1 SV=4	100	0	NP_003282.2	tripeptidyl-peptidase 2 isoform 1 [Homo sapiens]
P12694	case1-VS-control	-1.45586	0.183243	-7.94498	8	4.59e-05	0.000171667	Down	P12694	2-oxoisovalerate dehydrogenase subunit alpha, mitochondrial OS=Homo sapiens OX=9606 GN=BCKDHA PE=1 SV=2	100	0	NP_000700.1	2-oxoisovalerate dehydrogenase subunit alpha, mitochondrial isoform 1 precursor [Homo sapiens]
Q5C9Z4	case1-VS-control	-1.67453	0.188352	-8.89044	7	4.62e-05	0.000172649	Down	Q5C9Z4	Nucleolar MIF4G domain-containing protein 1 OS=Homo sapiens OX=9606 GN=NOM1 PE=1 SV=1	100	0	NP_612409.1	nucleolar MIF4G domain-containing protein 1 isoform 1 [Homo sapiens]
Q5T4S7	case1-VS-control	4.33663	0.547089	7.92674	8	4.67e-05	0.00017424	Up	Q5T4S7	E3 ubiquitin-protein ligase UBR4 OS=Homo sapiens OX=9606 GN=UBR4 PE=1 SV=1	100	0	NP_065816.2	E3 ubiquitin-protein ligase UBR4 [Homo sapiens]
Q14558	case1-VS-control	4.15882	0.525079	7.92037	8	4.69e-05	0.000175107	Up	Q14558	Phosphoribosyl pyrophosphate synthase-associated protein 1 OS=Homo sapiens OX=9606 GN=PRPSAP1 PE=1 SV=2	100	0	Q14558.2	RecName: Full=Phosphoribosyl pyrophosphate synthase-associated protein 1; Short=PRPP synthase-associated protein 1; AltName: Full=39 kDa phosphoribosypyrophosphate synthase-associated protein; Short=PAP39
O15400	case1-VS-control	-1.86037	0.235128	-7.91216	8	4.73e-05	0.000176271	Down	O15400	Syntaxin-7 OS=Homo sapiens OX=9606 GN=STX7 PE=1 SV=4	100	0	NP_003560.2	syntaxin-7 isoform a [Homo sapiens]
P23588	case1-VS-control	2.58196	0.326518	7.90756	8	4.75e-05	0.000176865	Up	P23588	Eukaryotic translation initiation factor 4B OS=Homo sapiens OX=9606 GN=EIF4B PE=1 SV=2	100	0	NP_001408.2	eukaryotic translation initiation factor 4B isoform 2 [Homo sapiens]
O60427	case1-VS-control	0.849854	0.0821546	10.3446	6	4.77e-05	0.000177101	None	O60427	Fatty acid desaturase 1 OS=Homo sapiens OX=9606 GN=FADS1 PE=1 SV=3	100	0	XP_001150290.3	PREDICTED: fatty acid desaturase 1 isoform X1 [Pan troglodytes]
P34059	case1-VS-control	-1.01902	0.0782538	-13.022	5	4.76e-05	0.000177101	Down	P34059	N-acetylgalactosamine-6-sulfatase OS=Homo sapiens OX=9606 GN=GALNS PE=1 SV=1	100	0	NP_000503.1	N-acetylgalactosamine-6-sulfatase isoform 1 precursor [Homo sapiens]
Q08J23	case1-VS-control	2.18204	0.276151	7.9016	8	4.77e-05	0.000177101	Up	Q08J23	tRNA (cytosine(34)-C(5))-methyltransferase OS=Homo sapiens OX=9606 GN=NSUN2 PE=1 SV=2	100	0	NP_060225.4	tRNA (cytosine(34)-C(5))-methyltransferase isoform 1 [Homo sapiens]
Q53FA7	case1-VS-control	1.31788	0.16676	7.90283	8	4.77e-05	0.000177101	Up	Q53FA7	Quinone oxidoreductase PIG3 OS=Homo sapiens OX=9606 GN=TP53I3 PE=1 SV=2	100	0	NP_004872.2	quinone oxidoreductase PIG3 isoform 1 [Homo sapiens]
Q99567	case1-VS-control	-0.396736	0.0501985	-7.90335	8	4.77e-05	0.000177101	None	Q99567	Nuclear pore complex protein Nup88 OS=Homo sapiens OX=9606 GN=NUP88 PE=1 SV=2	100	0	NP_002523.2	nuclear pore complex protein Nup88 isoform 2 [Homo sapiens]
O43747	case1-VS-control	0.686447	0.0869115	7.89822	8	4.79e-05	0.000177436	None	O43747	AP-1 complex subunit gamma-1 OS=Homo sapiens OX=9606 GN=AP1G1 PE=1 SV=5	100	0	EHH31820.1	Adapter-related protein complex 1 subunit gamma-1 [Macaca mulatta]
P40939	case1-VS-control	-1.06986	0.135464	-7.89774	8	4.79e-05	0.000177436	Down	P40939	Trifunctional enzyme subunit alpha, mitochondrial OS=Homo sapiens OX=9606 GN=HADHA PE=1 SV=2	100	0	NP_000173.2	trifunctional enzyme subunit alpha, mitochondrial precursor [Homo sapiens]
P35606	case1-VS-control	1.9133	0.242308	7.89613	8	4.8e-05	0.000177551	Up	P35606	Coatomer subunit beta' OS=Homo sapiens OX=9606 GN=COPB2 PE=1 SV=2	100	0	NP_004757.1	coatomer subunit beta' [Homo sapiens]
P05166	case1-VS-control	-1.33336	0.168969	-7.89114	8	4.82e-05	0.000178012	Down	P05166	Propionyl-CoA carboxylase beta chain, mitochondrial OS=Homo sapiens OX=9606 GN=PCCB PE=1 SV=3	100	0	NP_000523.2	propionyl-CoA carboxylase beta chain, mitochondrial isoform 1 precursor [Homo sapiens]
P14618	case1-VS-control	2.64951	0.335894	7.88794	8	4.83e-05	0.000178012	Up	P14618	Pyruvate kinase PKM OS=Homo sapiens OX=9606 GN=PKM PE=1 SV=4	100	0	XP_018865979.1	PREDICTED: pyruvate kinase PKM isoform X1 [Gorilla gorilla gorilla]
Q12906	case1-VS-control	-0.6996	0.0886893	-7.88821	8	4.83e-05	0.000178012	None	Q12906	Interleukin enhancer-binding factor 3 OS=Homo sapiens OX=9606 GN=ILF3 PE=1 SV=3	100	0	NP_036350.2	interleukin enhancer-binding factor 3 isoform a [Homo sapiens]
Q93050	case1-VS-control	-0.73848	0.0935841	-7.89108	8	4.82e-05	0.000178012	None	Q93050	V-type proton ATPase 116 kDa subunit a isoform 1 OS=Homo sapiens OX=9606 GN=ATP6V0A1 PE=1 SV=3	100	0	NP_001123493.1	V-type proton ATPase 116 kDa subunit a isoform 1 isoform b [Homo sapiens]
Q99797	case1-VS-control	-1.22163	0.154839	-7.88969	8	4.83e-05	0.000178012	Down	Q99797	Mitochondrial intermediate peptidase OS=Homo sapiens OX=9606 GN=MIPEP PE=1 SV=2	100	0	Q99797.2	RecName: Full=Mitochondrial intermediate peptidase; Short=MIP; Flags: Precursor
Q9NUQ6	case1-VS-control	-1.19905	0.151965	-7.89028	8	4.82e-05	0.000178012	Down	Q9NUQ6	SPATS2-like protein OS=Homo sapiens OX=9606 GN=SPATS2L PE=1 SV=2	100	0	BAG61258.1	unnamed protein product [Homo sapiens]
Q6YN16	case1-VS-control	-0.840348	0.106683	-7.87704	8	4.88e-05	0.000179642	None	Q6YN16	Hydroxysteroid dehydrogenase-like protein 2 OS=Homo sapiens OX=9606 GN=HSDL2 PE=1 SV=1	100	0	NP_115679.2	hydroxysteroid dehydrogenase-like protein 2 isoform 1 [Homo sapiens]
Q9NWX6	case1-VS-control	1.52941	0.173598	8.8101	7	4.9e-05	0.00018017	Up	Q9NWX6	Probable tRNA(His) guanylyltransferase OS=Homo sapiens OX=9606 GN=THG1L PE=1 SV=2	100	0	NP_060342.2	probable tRNA(His) guanylyltransferase isoform 1 [Homo sapiens]
Q9H0R6	case1-VS-control	-1.75264	0.222642	-7.87201	8	4.9e-05	0.000180177	Down	Q9H0R6	Glutamyl-tRNA(Gln) amidotransferase subunit A, mitochondrial OS=Homo sapiens OX=9606 GN=QRSL1 PE=1 SV=2	100	0	NP_060762.3	glutamyl-tRNA(Gln) amidotransferase subunit A, mitochondrial [Homo sapiens]
P39019	case1-VS-control	1.81008	0.230214	7.86258	8	4.95e-05	0.000181586	Up	P39019	40S ribosomal protein S19 OS=Homo sapiens OX=9606 GN=RPS19 PE=1 SV=2	100	2e-103	XP_014406408.1	PREDICTED: 40S ribosomal protein S19 isoform X1 [Camelus ferus]
Q99757	case1-VS-control	-1.32906	0.169106	-7.85933	8	4.96e-05	0.000181979	Down	Q99757	Thioredoxin, mitochondrial OS=Homo sapiens OX=9606 GN=TXN2 PE=1 SV=2	100	1e-120	NP_036605.2	thioredoxin, mitochondrial precursor [Homo sapiens]
Q12996	case1-VS-control	-1.25287	0.159443	-7.85782	8	4.97e-05	0.000182083	Down	Q12996	Cleavage stimulation factor subunit 3 OS=Homo sapiens OX=9606 GN=CSTF3 PE=1 SV=1	100	0	NP_001317.1	cleavage stimulation factor subunit 3 isoform 1 [Homo sapiens]
Q8NBF2	case1-VS-control	1.84991	0.210541	8.78642	7	4.99e-05	0.000182604	Up	Q8NBF2	NHL repeat-containing protein 2 OS=Homo sapiens OX=9606 GN=NHLRC2 PE=1 SV=1	100	0	NP_940916.2	NHL repeat-containing protein 2 [Homo sapiens]
Q04837	case1-VS-control	-0.826186	0.105342	-7.84291	8	5.04e-05	0.000184285	None	Q04837	Single-stranded DNA-binding protein, mitochondrial OS=Homo sapiens OX=9606 GN=SSBP1 PE=1 SV=1	100	6e-106	NP_003134.1	single-stranded DNA-binding protein, mitochondrial precursor [Homo sapiens]
P40616	case1-VS-control	0.617112	0.0787294	7.83838	8	5.06e-05	0.000184792	None	P40616	ADP-ribosylation factor-like protein 1 OS=Homo sapiens OX=9606 GN=ARL1 PE=1 SV=1	100	2e-131	NP_001168.1	ADP-ribosylation factor-like protein 1 isoform 1 [Homo sapiens]
Q9Y6M7	case1-VS-control	-1.33245	0.169996	-7.83814	8	5.06e-05	0.000184792	Down	Q9Y6M7	Sodium bicarbonate cotransporter 3 OS=Homo sapiens OX=9606 GN=SLC4A7 PE=1 SV=2	100	0	NP_003606.3	sodium bicarbonate cotransporter 3 isoform a [Homo sapiens]
Q96G21	case1-VS-control	-1.09904	0.140269	-7.83524	8	5.07e-05	0.000185135	Down	Q96G21	U3 small nucleolar ribonucleoprotein protein IMP4 OS=Homo sapiens OX=9606 GN=IMP4 PE=1 SV=1	100	0	NP_219484.1	U3 small nucleolar ribonucleoprotein protein IMP4 isoform a [Homo sapiens]
O95373	case1-VS-control	2.54342	0.324874	7.82896	8	5.1e-05	0.000185884	Up	O95373	Importin-7 OS=Homo sapiens OX=9606 GN=IPO7 PE=1 SV=1	100	0	NP_006382.1	importin-7 [Homo sapiens]
Q6PGP7	case1-VS-control	1.45376	0.16604	8.75546	7	5.1e-05	0.000185884	Up	Q6PGP7	Tetratricopeptide repeat protein 37 OS=Homo sapiens OX=9606 GN=TTC37 PE=1 SV=1	100	0	NP_055454.1	tetratricopeptide repeat protein 37 [Homo sapiens]
Q9Y3U8	case1-VS-control	1.04627	0.133654	7.82821	8	5.1e-05	0.000185884	Up	Q9Y3U8	60S ribosomal protein L36 OS=Homo sapiens OX=9606 GN=RPL36 PE=1 SV=3	100	2e-69	EDL38178.1	mCG5564, partial [Mus musculus]
P35237	case1-VS-control	3.47785	0.444364	7.82656	8	5.11e-05	0.000186016	Up	P35237	Serpin B6 OS=Homo sapiens OX=9606 GN=SERPINB6 PE=1 SV=3	100	0	NP_001182220.2	serpin B6 isoform b [Homo sapiens]
P61960	case1-VS-control	1.5121	0.193367	7.81984	8	5.14e-05	0.000186718	Up	P61960	Ubiquitin-fold modifier 1 OS=Homo sapiens OX=9606 GN=UFM1 PE=1 SV=1	100	9e-56	NP_057701.1	ubiquitin-fold modifier 1 isoform 1 precursor [Homo sapiens]
Q15631	case1-VS-control	2.64089	0.337646	7.82148	8	5.14e-05	0.000186718	Up	Q15631	Translin OS=Homo sapiens OX=9606 GN=TSN PE=1 SV=1	100	2e-166	NP_004613.1	translin isoform 1 [Homo sapiens]
Q9H0U6	case1-VS-control	-1.55379	0.198683	-7.82045	8	5.14e-05	0.000186718	Down	Q9H0U6	39S ribosomal protein L18, mitochondrial OS=Homo sapiens OX=9606 GN=MRPL18 PE=1 SV=1	100	7e-131	NP_054880.2	39S ribosomal protein L18, mitochondrial isoform 1 [Homo sapiens]
Q96E39	case1-VS-control	-1.28607	0.164605	-7.81303	8	5.18e-05	0.000187737	Down	Q96E39	RNA binding motif protein, X-linked-like-1 OS=Homo sapiens OX=9606 GN=RBMXL1 PE=1 SV=1	100	0	NP_062556.2	RNA binding motif protein, X-linked-like-1 [Homo sapiens]
P51151	case1-VS-control	0.761273	0.0975006	7.80788	8	5.2e-05	0.000188477	None	P51151	Ras-related protein Rab-9A OS=Homo sapiens OX=9606 GN=RAB9A PE=1 SV=1	100	1e-150	NP_004242.1	ras-related protein Rab-9A [Homo sapiens]
Q8IYQ7	case1-VS-control	-2.17692	0.249608	-8.72136	7	5.23e-05	0.000188788	Down	Q8IYQ7	Threonine synthase-like 1 OS=Homo sapiens OX=9606 GN=THNSL1 PE=1 SV=2	100	0	NP_079114.3	threonine synthase-like 1 [Homo sapiens]
Q96MW5	case1-VS-control	1.28801	0.16511	7.8009	8	5.23e-05	0.000188788	Up	Q96MW5	Conserved oligomeric Golgi complex subunit 8 OS=Homo sapiens OX=9606 GN=COG8 PE=1 SV=2	100	0	NP_115758.3	conserved oligomeric Golgi complex subunit 8 [Homo sapiens]
Q9GZS1	case1-VS-control	-0.892242	0.114347	-7.80291	8	5.22e-05	0.000188788	None	Q9GZS1	DNA-directed RNA polymerase I subunit RPA49 OS=Homo sapiens OX=9606 GN=POLR1E PE=1 SV=2	100	0	XP_005251604.1	PREDICTED: DNA-directed RNA polymerase I subunit RPA49 isoform X1 [Homo sapiens]
Q9H9T3	case1-VS-control	3.29576	0.258016	12.7734	5	5.23e-05	0.000188788	Up	Q9H9T3	Elongator complex protein 3 OS=Homo sapiens OX=9606 GN=ELP3 PE=1 SV=2	100	0	NP_060561.3	elongator complex protein 3 isoform 1 [Homo sapiens]
Q9P0J7	case1-VS-control	3.56556	0.350165	10.1825	6	5.22e-05	0.000188788	Up	Q9P0J7	E3 ubiquitin-protein ligase KCMF1 OS=Homo sapiens OX=9606 GN=KCMF1 PE=1 SV=2	100	0	NP_064507.3	E3 ubiquitin-protein ligase KCMF1 [Homo sapiens]
Q9UBV8	case1-VS-control	2.24408	0.175659	12.7752	5	5.23e-05	0.000188788	Up	Q9UBV8	Peflin OS=Homo sapiens OX=9606 GN=PEF1 PE=1 SV=1	100	0	NP_036524.1	peflin [Homo sapiens]
P14324	case1-VS-control	2.20306	0.282568	7.79655	8	5.25e-05	0.000189244	Up	P14324	Farnesyl pyrophosphate synthase OS=Homo sapiens OX=9606 GN=FDPS PE=1 SV=4	100	0	NP_001995.1	farnesyl pyrophosphate synthase isoform a [Homo sapiens]
P61221	case1-VS-control	1.57068	0.201453	7.79673	8	5.25e-05	0.000189244	Up	P61221	ATP-binding cassette sub-family E member 1 OS=Homo sapiens OX=9606 GN=ABCE1 PE=1 SV=1	100	0	KFO20588.1	ATP-binding cassette sub-family E member 1 [Fukomys damarensis]
P19623	case1-VS-control	3.68731	0.473315	7.79039	8	5.28e-05	0.000190167	Up	P19623	Spermidine synthase OS=Homo sapiens OX=9606 GN=SRM PE=1 SV=1	100	0	NP_003123.2	spermidine synthase [Homo sapiens]
Q9BSH4	case1-VS-control	-1.42352	0.182851	-7.78514	8	5.31e-05	0.000190936	Down	Q9BSH4	Translational activator of cytochrome c oxidase 1 OS=Homo sapiens OX=9606 GN=TACO1 PE=1 SV=1	100	0	NP_057444.2	translational activator of cytochrome c oxidase 1 [Homo sapiens]
P43246	case1-VS-control	0.966253	0.124197	7.78001	8	5.33e-05	0.000191537	None	P43246	DNA mismatch repair protein Msh2 OS=Homo sapiens OX=9606 GN=MSH2 PE=1 SV=1	100	0	NP_000242.1	DNA mismatch repair protein Msh2 isoform 1 [Homo sapiens]
Q9BXW7	case1-VS-control	-1.56804	0.201546	-7.78004	8	5.33e-05	0.000191537	Down	Q9BXW7	Haloacid dehalogenase-like hydrolase domain-containing 5 OS=Homo sapiens OX=9606 GN=HDHD5 PE=1 SV=1	100	0	NP_149061.1	haloacid dehalogenase-like hydrolase domain-containing 5 isoform 2 precursor [Homo sapiens]
Q16795	case1-VS-control	-0.703917	0.0906581	-7.76453	8	5.41e-05	0.000194134	None	Q16795	NADH dehydrogenase [ubiquinone] 1 alpha subcomplex subunit 9, mitochondrial OS=Homo sapiens OX=9606 GN=NDUFA9 PE=1 SV=2	100	0	NP_004993.1	NADH dehydrogenase [ubiquinone] 1 alpha subcomplex subunit 9, mitochondrial precursor [Homo sapiens]
P14866	case1-VS-control	-1.19751	0.15427	-7.76244	8	5.42e-05	0.000194203	Down	P14866	Heterogeneous nuclear ribonucleoprotein L OS=Homo sapiens OX=9606 GN=HNRNPL PE=1 SV=2	100	0	NP_001524.2	heterogeneous nuclear ribonucleoprotein L isoform a [Homo sapiens]
Q6UWS5	case1-VS-control	0.92183	0.10628	8.67359	7	5.42e-05	0.000194203	None	Q6UWS5	Protein PET117 homolog, mitochondrial OS=Homo sapiens OX=9606 GN=PET117 PE=3 SV=1	100	3e-49	NP_001158283.1	protein PET117 homolog, mitochondrial precursor [Homo sapiens]
O75947	case1-VS-control	-0.666088	0.0858241	-7.76109	8	5.43e-05	0.000194292	None	O75947	ATP synthase subunit d, mitochondrial OS=Homo sapiens OX=9606 GN=ATP5PD PE=1 SV=3	100	1e-113	NP_006347.1	ATP synthase subunit d, mitochondrial isoform a [Homo sapiens]
Q9NX57	case1-VS-control	-1.21036	0.119718	-10.1101	6	5.44e-05	0.000194601	Down	Q9NX57	Ras-related protein Rab-20 OS=Homo sapiens OX=9606 GN=RAB20 PE=1 SV=1	100	9e-177	NP_060287.1	ras-related protein Rab-20 [Homo sapiens]
P46776	case1-VS-control	0.915493	0.118021	7.75705	8	5.45e-05	0.000194711	None	P46776	60S ribosomal protein L27a OS=Homo sapiens OX=9606 GN=RPL27A PE=1 SV=2	100	2e-104	NP_000981.1	60S ribosomal protein L27a [Homo sapiens]
P63208	case1-VS-control	0.981203	0.126578	7.75178	8	5.48e-05	0.000195507	None	P63208	S-phase kinase-associated protein 1 OS=Homo sapiens OX=9606 GN=SKP1 PE=1 SV=2	100	8e-116	XP_018110401.1	PREDICTED: S-phase kinase-associated protein 1 isoform X1 [Xenopus laevis]
Q9NRS6	case1-VS-control	0.327346	0.0324673	10.0823	6	5.53e-05	0.000197217	None	Q9NRS6	Sorting nexin-15 OS=Homo sapiens OX=9606 GN=SNX15 PE=1 SV=1	100	0	NP_037438.2	sorting nexin-15 isoform A [Homo sapiens]
P07195	case1-VS-control	3.2573	0.420862	7.73958	8	5.54e-05	0.000197258	Up	P07195	L-lactate dehydrogenase B chain OS=Homo sapiens OX=9606 GN=LDHB PE=1 SV=2	100	0	NP_001302466.1	L-lactate dehydrogenase B chain isoform LDHBx [Homo sapiens]
P61160	case1-VS-control	0.899056	0.116163	7.73959	8	5.54e-05	0.000197258	None	P61160	Actin-related protein 2 OS=Homo sapiens OX=9606 GN=ACTR2 PE=1 SV=1	100	0	NP_005713.1	actin-related protein 2 isoform b [Homo sapiens]
Q13362	case1-VS-control	2.09738	0.271325	7.73012	8	5.59e-05	0.000198836	Up	Q13362;Q14738	Serine/threonine-protein phosphatase 2A 56 kDa regulatory subunit gamma isoform OS=Homo sapiens OX=9606 GN=PPP2R5C PE=1 SV=3	100	0	NP_002710.2	serine/threonine-protein phosphatase 2A 56 kDa regulatory subunit gamma isoform isoform a [Homo sapiens]
O14880	case1-VS-control	2.36314	0.305742	7.72921	8	5.59e-05	0.000198848	Up	O14880	Microsomal glutathione S-transferase 3 OS=Homo sapiens OX=9606 GN=MGST3 PE=1 SV=1	100	2e-108	NP_004519.1	microsomal glutathione S-transferase 3 [Homo sapiens]
Q9UHX1	case1-VS-control	-0.504826	0.0653476	-7.72524	8	5.61e-05	0.000199423	None	Q9UHX1	Poly(U)-binding-splicing factor PUF60 OS=Homo sapiens OX=9606 GN=PUF60 PE=1 SV=1	100	0	NP_510965.1	poly(U)-binding-splicing factor PUF60 isoform a [Homo sapiens]
Q9NZR2	case1-VS-control	-3.33243	0.386372	-8.62491	7	5.62e-05	0.000199651	Down	Q9NZR2	Low-density lipoprotein receptor-related protein 1B OS=Homo sapiens OX=9606 GN=LRP1B PE=1 SV=2	100	0	NP_061027.2	low-density lipoprotein receptor-related protein 1B precursor [Homo sapiens]
Q99598	case1-VS-control	2.95694	0.38307	7.71907	8	5.64e-05	0.000200253	Up	Q99598	Translin-associated protein X OS=Homo sapiens OX=9606 GN=TSNAX PE=1 SV=1	100	0	NP_005990.1	translin-associated protein X [Homo sapiens]
P35241	case1-VS-control	2.60825	0.259885	10.0362	6	5.67e-05	0.000200589	Up	P35241	Radixin OS=Homo sapiens OX=9606 GN=RDX PE=1 SV=1	100	0	NP_002897.1	radixin isoform 2 [Homo sapiens]
P51688	case1-VS-control	-0.907822	0.0904568	-10.036	6	5.67e-05	0.000200589	None	P51688	N-sulphoglucosamine sulphohydrolase OS=Homo sapiens OX=9606 GN=SGSH PE=1 SV=1	100	0	NP_000190.1	N-sulphoglucosamine sulphohydrolase isoform 1 precursor [Homo sapiens]
Q8WUQ7	case1-VS-control	-0.502759	0.06517	-7.71458	8	5.67e-05	0.000200589	None	Q8WUQ7	Cactin OS=Homo sapiens OX=9606 GN=CACTIN PE=1 SV=3	100	0	NP_001074012.1	cactin [Homo sapiens]
Q9BQA1	case1-VS-control	3.27187	0.424193	7.71317	8	5.67e-05	0.000200589	Up	Q9BQA1	Methylosome protein 50 OS=Homo sapiens OX=9606 GN=WDR77 PE=1 SV=1	100	0	NP_077007.1	methylosome protein 50 isoform 2 [Homo sapiens]
Q9BSD7	case1-VS-control	2.01067	0.260662	7.71371	8	5.67e-05	0.000200589	Up	Q9BSD7	Cancer-related nucleoside-triphosphatase OS=Homo sapiens OX=9606 GN=NTPCR PE=1 SV=1	100	4e-135	NP_115700.1	cancer-related nucleoside-triphosphatase isoform 1 [Homo sapiens]
P28072	case1-VS-control	2.08537	0.270455	7.7106	8	5.69e-05	0.000200892	Up	P28072	Proteasome subunit beta type-6 OS=Homo sapiens OX=9606 GN=PSMB6 PE=1 SV=4	100	3e-176	NP_002789.1	proteasome subunit beta type-6 isoform 1 precursor [Homo sapiens]
Q9H583	case1-VS-control	-0.95436	0.123856	-7.70542	8	5.71e-05	0.000201702	None	Q9H583	HEAT repeat-containing protein 1 OS=Homo sapiens OX=9606 GN=HEATR1 PE=1 SV=3	100	0	NP_060542.4	HEAT repeat-containing protein 1 [Homo sapiens]
Q92973	case1-VS-control	1.69838	0.220454	7.70403	8	5.72e-05	0.000201807	Up	Q92973	Transportin-1 OS=Homo sapiens OX=9606 GN=TNPO1 PE=1 SV=2	100	0	NP_002261.3	transportin-1 isoform 1 [Homo sapiens]
P68036	case1-VS-control	3.79625	0.492948	7.70111	8	5.74e-05	0.000202197	Up	P68036	Ubiquitin-conjugating enzyme E2 L3 OS=Homo sapiens OX=9606 GN=UBE2L3 PE=1 SV=1	100	2e-111	NP_003338.1	ubiquitin-conjugating enzyme E2 L3 isoform 1 [Homo sapiens]
Q9P0U4	case1-VS-control	-1.31168	0.170687	-7.68472	8	5.83e-05	0.000205138	Down	Q9P0U4	CXXC-type zinc finger protein 1 OS=Homo sapiens OX=9606 GN=CXXC1 PE=1 SV=2	100	0	NP_055408.2	CXXC-type zinc finger protein 1 isoform 2 [Homo sapiens]
P49207	case1-VS-control	1.17691	0.153265	7.67896	8	5.86e-05	0.000205756	Up	P49207	60S ribosomal protein L34 OS=Homo sapiens OX=9606 GN=RPL34 PE=1 SV=3	100	2e-78	ELR56038.1	60S ribosomal protein L34, partial [Bos mutus]
P49761	case1-VS-control	-0.972003	0.126581	-7.67891	8	5.86e-05	0.000205756	None	P49761	Dual specificity protein kinase CLK3 OS=Homo sapiens OX=9606 GN=CLK3 PE=1 SV=3	100	0	NP_001123500.1	dual specificity protein kinase CLK3 isoform a [Homo sapiens]
Q96CX2	case1-VS-control	2.69771	0.216133	12.4817	5	5.85e-05	0.000205756	Up	Q96CX2	BTB/POZ domain-containing protein KCTD12 OS=Homo sapiens OX=9606 GN=KCTD12 PE=1 SV=1	100	0	NP_612453.1	BTB/POZ domain-containing protein KCTD12 [Homo sapiens]
Q9NX20	case1-VS-control	-1.09244	0.142279	-7.67816	8	5.86e-05	0.000205756	Down	Q9NX20	39S ribosomal protein L16, mitochondrial OS=Homo sapiens OX=9606 GN=MRPL16 PE=1 SV=1	100	0	NP_060310.1	39S ribosomal protein L16, mitochondrial [Homo sapiens]
P52597	case1-VS-control	-0.535661	0.069794	-7.67488	8	5.88e-05	0.000206227	None	P52597	Heterogeneous nuclear ribonucleoprotein F OS=Homo sapiens OX=9606 GN=HNRNPF PE=1 SV=3	100	0	NP_004957.1	heterogeneous nuclear ribonucleoprotein F [Homo sapiens]
A6NCS6	case1-VS-control	1.10435	0.144008	7.66863	8	5.91e-05	0.000206486	Up	A6NCS6	Uncharacterized protein C2orf72 OS=Homo sapiens OX=9606 GN=C2orf72 PE=1 SV=2	100	0	NP_001138466.1	uncharacterized protein C2orf72 [Homo sapiens]
P48163	case1-VS-control	4.34993	0.245013	17.7539	4	5.91e-05	0.000206486	Up	P48163	NADP-dependent malic enzyme OS=Homo sapiens OX=9606 GN=ME1 PE=1 SV=1	100	0	NP_002386.1	NADP-dependent malic enzyme [Homo sapiens]
P61457	case1-VS-control	5.4416	0.709597	7.66858	8	5.91e-05	0.000206486	Up	P61457	Pterin-4-alpha-carbinolamine dehydratase OS=Homo sapiens OX=9606 GN=PCBD1 PE=1 SV=2	100	8e-74	XP_006100009.2	PREDICTED: pterin-4-alpha-carbinolamine dehydratase [Myotis lucifugus]
Q5RKV6	case1-VS-control	-0.571488	0.0745165	-7.66929	8	5.91e-05	0.000206486	None	Q5RKV6	Exosome complex component MTR3 OS=Homo sapiens OX=9606 GN=EXOSC6 PE=1 SV=1	100	0	NP_478126.1	exosome complex component MTR3 [Homo sapiens]
Q7Z4Q2	case1-VS-control	1.96028	0.255622	7.66868	8	5.91e-05	0.000206486	Up	Q7Z4Q2	HEAT repeat-containing protein 3 OS=Homo sapiens OX=9606 GN=HEATR3 PE=1 SV=2	100	0	NP_891552.1	HEAT repeat-containing protein 3 isoform a [Homo sapiens]
Q9HCN4	case1-VS-control	3.86363	0.50357	7.67248	8	5.89e-05	0.000206486	Up	Q9HCN4	GPN-loop GTPase 1 OS=Homo sapiens OX=9606 GN=GPN1 PE=1 SV=1	100	0	Q9HCN4.1	RecName: Full=GPN-loop GTPase 1; AltName: Full=MBD2-interacting protein; Short=MBDin; AltName: Full=RNAPII-associated protein 4; AltName: Full=XPA-binding protein 1
P55769	case1-VS-control	-0.973785	0.127156	-7.65819	8	5.97e-05	0.000208333	None	P55769	NHP2-like protein 1 OS=Homo sapiens OX=9606 GN=SNU13 PE=1 SV=3	100	1e-89	NP_004999.1	NHP2-like protein 1 [Homo sapiens]
P51812	case1-VS-control	4.1868	0.337044	12.4221	5	5.99e-05	0.000208614	Up	P51812	Ribosomal protein S6 kinase alpha-3 OS=Homo sapiens OX=9606 GN=RPS6KA3 PE=1 SV=1	100	0	NP_004577.1	ribosomal protein S6 kinase alpha-3 [Homo sapiens]
Q07960	case1-VS-control	2.99589	0.391483	7.65267	8	6e-05	0.000208614	Up	Q07960	Rho GTPase-activating protein 1 OS=Homo sapiens OX=9606 GN=ARHGAP1 PE=1 SV=1	100	0	AAA16142.1	CDC42 GTPase-activating protein, partial [Homo sapiens]
Q15029	case1-VS-control	-0.539265	0.0704608	-7.65341	8	6e-05	0.000208614	None	Q15029	116 kDa U5 small nuclear ribonucleoprotein component OS=Homo sapiens OX=9606 GN=EFTUD2 PE=1 SV=1	100	0	NP_004238.3	116 kDa U5 small nuclear ribonucleoprotein component isoform a [Homo sapiens]
Q63ZY3	case1-VS-control	-1.95513	0.255452	-7.65362	8	6e-05	0.000208614	Down	Q63ZY3	KN motif and ankyrin repeat domain-containing protein 2 OS=Homo sapiens OX=9606 GN=KANK2 PE=1 SV=1	100	0	NP_001129663.1	KN motif and ankyrin repeat domain-containing protein 2 isoform 2 [Homo sapiens]
Q6YHK3	case1-VS-control	-1.43205	0.144103	-9.93765	6	6e-05	0.000208614	Down	Q6YHK3	CD109 antigen OS=Homo sapiens OX=9606 GN=CD109 PE=1 SV=2	100	0	NP_598000.2	CD109 antigen isoform 1 preproprotein [Homo sapiens]
P04844	case1-VS-control	-0.632208	0.0826477	-7.64943	8	6.02e-05	0.000209081	None	P04844	Dolichyl-diphosphooligosaccharide--protein glycosyltransferase subunit 2 OS=Homo sapiens OX=9606 GN=RPN2 PE=1 SV=3	100	0	NP_002942.2	dolichyl-diphosphooligosaccharide--protein glycosyltransferase subunit 2 isoform 1 precursor [Homo sapiens]
P36639	case1-VS-control	2.00958	0.262743	7.64846	8	6.03e-05	0.000209112	Up	P36639	7,8-dihydro-8-oxoguanine triphosphatase OS=Homo sapiens OX=9606 GN=NUDT1 PE=1 SV=3	100	5e-144	P36639.3	RecName: Full=7,8-dihydro-8-oxoguanine triphosphatase; AltName: Full=2-hydroxy-dATP diphosphatase; AltName: Full=8-oxo-dGTPase; AltName: Full=Nucleoside diphosphate-linked moiety X motif 1; Short=Nudix motif 1; Flags: Precursor
Q9UBI6	case1-VS-control	-1.07099	0.140123	-7.6432	8	6.06e-05	0.000209981	Down	Q9UBI6	Guanine nucleotide-binding protein G(I)/G(S)/G(O) subunit gamma-12 OS=Homo sapiens OX=9606 GN=GNG12 PE=1 SV=3	100	4e-46	NP_061329.3	guanine nucleotide-binding protein G(I)/G(S)/G(O) subunit gamma-12 precursor [Homo sapiens]
Q7L5N7	case1-VS-control	-1.66801	0.13473	-12.3803	5	6.09e-05	0.000211086	Down	Q7L5N7	Lysophosphatidylcholine acyltransferase 2 OS=Homo sapiens OX=9606 GN=LPCAT2 PE=1 SV=1	100	0	NP_060309.2	lysophosphatidylcholine acyltransferase 2 [Homo sapiens]
P40222	case1-VS-control	1.92508	0.252149	7.63467	8	6.1e-05	0.000211337	Up	P40222	Alpha-taxilin OS=Homo sapiens OX=9606 GN=TXLNA PE=1 SV=3	100	0	NP_787048.1	alpha-taxilin [Homo sapiens]
P26640	case1-VS-control	1.57358	0.206352	7.6257	8	6.16e-05	0.000212953	Up	P26640	Valine--tRNA ligase OS=Homo sapiens OX=9606 GN=VARS PE=1 SV=4	100	0	NP_006286.1	valine--tRNA ligase [Homo sapiens]
P30043	case1-VS-control	3.43905	0.451289	7.6205	8	6.19e-05	0.00021383	Up	P30043	Flavin reductase (NADPH) OS=Homo sapiens OX=9606 GN=BLVRB PE=1 SV=3	100	2e-149	NP_000704.1	flavin reductase (NADPH) [Homo sapiens]
P49755	case1-VS-control	-0.750238	0.0984782	-7.61832	8	6.2e-05	0.000214104	None	P49755	Transmembrane emp24 domain-containing protein 10 OS=Homo sapiens OX=9606 GN=TMED10 PE=1 SV=2	100	9e-161	CAD66561.1	unnamed protein product, partial [Homo sapiens]
P53618	case1-VS-control	2.07106	0.271922	7.61638	8	6.21e-05	0.000214168	Up	P53618	Coatomer subunit beta OS=Homo sapiens OX=9606 GN=COPB1 PE=1 SV=3	100	0	NP_057535.1	coatomer subunit beta [Homo sapiens]
Q96T58	case1-VS-control	-1.38034	0.181231	-7.61646	8	6.21e-05	0.000214168	Down	Q96T58	Msx2-interacting protein OS=Homo sapiens OX=9606 GN=SPEN PE=1 SV=1	100	0	NP_055816.2	msx2-interacting protein [Homo sapiens]
P28070	case1-VS-control	1.97652	0.259619	7.61318	8	6.23e-05	0.000214647	Up	P28070	Proteasome subunit beta type-4 OS=Homo sapiens OX=9606 GN=PSMB4 PE=1 SV=4	100	0	NP_002787.2	proteasome subunit beta type-4 [Homo sapiens]
P35659	case1-VS-control	-2.82993	0.372	-7.60734	8	6.26e-05	0.000215484	Down	P35659	Protein DEK OS=Homo sapiens OX=9606 GN=DEK PE=1 SV=1	100	0	NP_003463.1	protein DEK isoform 1 [Homo sapiens]
Q13217	case1-VS-control	-0.726149	0.0954629	-7.60661	8	6.27e-05	0.000215484	None	Q13217	DnaJ homolog subfamily C member 3 OS=Homo sapiens OX=9606 GN=DNAJC3 PE=1 SV=1	100	0	NP_006251.1	dnaJ homolog subfamily C member 3 precursor [Homo sapiens]
Q9NV06	case1-VS-control	-1.05918	0.139232	-7.60729	8	6.26e-05	0.000215484	Down	Q9NV06	DDB1- and CUL4-associated factor 13 OS=Homo sapiens OX=9606 GN=DCAF13 PE=1 SV=2	99.775	0	BAB55377.1	unnamed protein product [Homo sapiens]
P05413	case1-VS-control	-0.610938	0.0803929	-7.5994	8	6.31e-05	0.00021678	None	P05413	Fatty acid-binding protein, heart OS=Homo sapiens OX=9606 GN=FABP3 PE=1 SV=4	100	6e-92	NP_004093.1	fatty acid-binding protein, heart isoform 2 [Homo sapiens]
O43251	case1-VS-control	-1.74036	0.229495	-7.58344	8	6.4e-05	0.000219718	Down	O43251	RNA binding protein fox-1 homolog 2 OS=Homo sapiens OX=9606 GN=RBFOX2 PE=1 SV=3	100	0	O43251.3	RecName: Full=RNA binding protein fox-1 homolog 2; AltName: Full=Fox-1 homolog B; AltName: Full=Hexaribonucleotide-binding protein 2; AltName: Full=RNA-binding motif protein 9; AltName: Full=RNA-binding protein 9; AltName: Full=Repressor of tamoxifen transcriptional activity
Q09028	case1-VS-control	-0.684497	0.09026	-7.58362	8	6.4e-05	0.000219718	None	Q09028	Histone-binding protein RBBP4 OS=Homo sapiens OX=9606 GN=RBBP4 PE=1 SV=3	100	0	XP_008271973.1	PREDICTED: histone-binding protein RBBP4 [Oryctolagus cuniculus]
Q9Y383	case1-VS-control	0.849895	0.112136	7.57914	8	6.43e-05	0.000220443	None	Q9Y383	Putative RNA-binding protein Luc7-like 2 OS=Homo sapiens OX=9606 GN=LUC7L2 PE=1 SV=2	100	0	NP_057103.2	putative RNA-binding protein Luc7-like 2 isoform 1 [Homo sapiens]
Q16775	case1-VS-control	-0.831201	0.109741	-7.57421	8	6.46e-05	0.000221299	None	Q16775	Hydroxyacylglutathione hydrolase, mitochondrial OS=Homo sapiens OX=9606 GN=HAGH PE=1 SV=2	100	0	NP_005317.2	hydroxyacylglutathione hydrolase, mitochondrial isoform 1 precursor [Homo sapiens]
Q9BWF3	case1-VS-control	-0.781972	0.103288	-7.57079	8	6.48e-05	0.000221846	None	Q9BWF3	RNA-binding protein 4 OS=Homo sapiens OX=9606 GN=RBM4 PE=1 SV=1	100	0	XP_011842338.1	PREDICTED: RNA-binding protein 4 isoform X1 [Mandrillus leucophaeus]
P16219	case1-VS-control	-1.18651	0.156831	-7.5655	8	6.51e-05	0.000222424	Down	P16219	Short-chain specific acyl-CoA dehydrogenase, mitochondrial OS=Homo sapiens OX=9606 GN=ACADS PE=1 SV=1	100	0	NP_000008.1	short-chain specific acyl-CoA dehydrogenase, mitochondrial isoform 1 precursor [Homo sapiens]
P20810	case1-VS-control	1.63626	0.216295	7.56495	8	6.52e-05	0.000222424	Up	P20810	Calpastatin OS=Homo sapiens OX=9606 GN=CAST PE=1 SV=4	100	0	XP_006714762.1	PREDICTED: calpastatin isoform X5 [Homo sapiens]
P23381	case1-VS-control	2.09433	0.276836	7.56525	8	6.51e-05	0.000222424	Up	P23381	Tryptophan--tRNA ligase, cytoplasmic OS=Homo sapiens OX=9606 GN=WARS PE=1 SV=2	100	0	NP_004175.2	tryptophan--tRNA ligase, cytoplasmic isoform a [Homo sapiens]
Q9Y3B3	case1-VS-control	-1.10234	0.14572	-7.56482	8	6.52e-05	0.000222424	Down	Q9Y3B3	Transmembrane emp24 domain-containing protein 7 OS=Homo sapiens OX=9606 GN=TMED7 PE=1 SV=2	100	4e-168	NP_861974.1	transmembrane emp24 domain-containing protein 7 precursor [Homo sapiens]
O94905	case1-VS-control	-0.399521	0.05285	-7.55954	8	6.55e-05	0.000223366	None	O94905	Erlin-2 OS=Homo sapiens OX=9606 GN=ERLIN2 PE=1 SV=1	100	0	NP_009106.1	erlin-2 isoform 1 [Homo sapiens]
P83881	case1-VS-control	1.7635	0.233427	7.55484	8	6.58e-05	0.000224189	Up	P83881;Q969Q0	60S ribosomal protein L36a OS=Homo sapiens OX=9606 GN=RPL36A PE=1 SV=2	100	9e-72	XP_006210332.1	PREDICTED: 60S ribosomal protein L36a [Vicugna pacos]
P25788	case1-VS-control	1.93128	0.255721	7.55232	8	6.59e-05	0.000224554	Up	P25788	Proteasome subunit alpha type-3 OS=Homo sapiens OX=9606 GN=PSMA3 PE=1 SV=2	100	0	NP_002779.1	proteasome subunit alpha type-3 isoform 1 [Homo sapiens]
Q16611	case1-VS-control	-1.1687	0.154815	-7.54899	8	6.61e-05	0.000225091	Down	Q16611	Bcl-2 homologous antagonist/killer OS=Homo sapiens OX=9606 GN=BAK1 PE=1 SV=1	100	6e-155	NP_001179.1	bcl-2 homologous antagonist/killer [Homo sapiens]
Q9BUP3	case1-VS-control	0.813053	0.107718	7.54795	8	6.62e-05	0.000225143	None	Q9BUP3	Oxidoreductase HTATIP2 OS=Homo sapiens OX=9606 GN=HTATIP2 PE=1 SV=2	100	2e-178	NP_001091990.1	oxidoreductase HTATIP2 isoform a precursor [Homo sapiens]
P53582	case1-VS-control	0.924231	0.122503	7.54457	8	6.64e-05	0.000225694	None	P53582	Methionine aminopeptidase 1 OS=Homo sapiens OX=9606 GN=METAP1 PE=1 SV=2	100	0	NP_055958.2	methionine aminopeptidase 1 [Homo sapiens]
Q16822	case1-VS-control	-0.70797	0.0938761	-7.54154	8	6.66e-05	0.000226171	None	Q16822	Phosphoenolpyruvate carboxykinase [GTP], mitochondrial OS=Homo sapiens OX=9606 GN=PCK2 PE=1 SV=4	100	0	NP_004554.3	phosphoenolpyruvate carboxykinase [GTP], mitochondrial isoform 1 precursor [Homo sapiens]
Q8WWI5	case1-VS-control	-2.85247	0.37828	-7.54065	8	6.67e-05	0.000226193	Down	Q8WWI5	Choline transporter-like protein 1 OS=Homo sapiens OX=9606 GN=SLC44A1 PE=1 SV=1	100	0	NP_536856.2	choline transporter-like protein 1 isoform a [Homo sapiens]
P27797	case1-VS-control	-1.23402	0.163893	-7.52941	8	6.74e-05	0.000228433	Down	P27797	Calreticulin OS=Homo sapiens OX=9606 GN=CALR PE=1 SV=1	100	0	NP_004334.1	calreticulin precursor [Homo sapiens]
Q9Y266	case1-VS-control	2.32227	0.191741	12.1115	5	6.78e-05	0.000229627	Up	Q9Y266	Nuclear migration protein nudC OS=Homo sapiens OX=9606 GN=NUDC PE=1 SV=1	100	0	NP_006591.1	nuclear migration protein nudC [Homo sapiens]
Q06587	case1-VS-control	-1.26825	0.168651	-7.51997	8	6.8e-05	0.000230137	Down	Q06587	E3 ubiquitin-protein ligase RING1 OS=Homo sapiens OX=9606 GN=RING1 PE=1 SV=2	100	0	NP_002922.2	E3 ubiquitin-protein ligase RING1 [Homo sapiens]
P19338	case1-VS-control	0.930408	0.123778	7.51678	8	6.82e-05	0.000230661	None	P19338	Nucleolin OS=Homo sapiens OX=9606 GN=NCL PE=1 SV=3	100	0	NP_005372.2	nucleolin [Homo sapiens]
P36915	case1-VS-control	3.13045	0.322202	9.7158	6	6.83e-05	0.000230716	Up	P36915	Guanine nucleotide-binding protein-like 1 OS=Homo sapiens OX=9606 GN=GNL1 PE=1 SV=2	100	0	NP_005266.2	guanine nucleotide-binding protein-like 1 [Homo sapiens]
O43865	case1-VS-control	1.91093	0.254439	7.51037	8	6.86e-05	0.000231718	Up	O43865	S-adenosylhomocysteine hydrolase-like protein 1 OS=Homo sapiens OX=9606 GN=AHCYL1 PE=1 SV=2	100	0	NP_006612.2	S-adenosylhomocysteine hydrolase-like protein 1 isoform a [Homo sapiens]
Q9NWA0	case1-VS-control	-2.01351	0.268379	-7.5025	8	6.91e-05	0.000233277	Down	Q9NWA0	Mediator of RNA polymerase II transcription subunit 9 OS=Homo sapiens OX=9606 GN=MED9 PE=1 SV=1	100	2e-100	NP_060489.1	mediator of RNA polymerase II transcription subunit 9 [Homo sapiens]
Q8IYB5	case1-VS-control	1.73276	0.231	7.50113	8	6.92e-05	0.000233408	Up	Q8IYB5	Stromal membrane-associated protein 1 OS=Homo sapiens OX=9606 GN=SMAP1 PE=1 SV=2	100	0	NP_001037770.1	stromal membrane-associated protein 1 isoform A [Homo sapiens]
P00338	case1-VS-control	3.0771	0.410454	7.49681	8	6.95e-05	0.000234191	Up	P00338	L-lactate dehydrogenase A chain OS=Homo sapiens OX=9606 GN=LDHA PE=1 SV=2	100	0	NP_005557.1	L-lactate dehydrogenase A chain isoform 1 [Homo sapiens]
Q8NC56	case1-VS-control	-1.71877	0.22934	-7.49443	8	6.96e-05	0.000234548	Down	Q8NC56	LEM domain-containing protein 2 OS=Homo sapiens OX=9606 GN=LEMD2 PE=1 SV=1	100	0	NP_851853.1	LEM domain-containing protein 2 isoform 1 [Homo sapiens]
Q15424	case1-VS-control	-1.07665	0.14374	-7.49027	8	6.99e-05	0.0002353	Down	Q15424	Scaffold attachment factor B1 OS=Homo sapiens OX=9606 GN=SAFB PE=1 SV=4	100	0	NP_002958.2	scaffold attachment factor B1 isoform 3 [Homo sapiens]
Q5JRA6	case1-VS-control	-1.03373	0.138047	-7.48823	8	7.01e-05	0.000235581	Down	Q5JRA6	Transport and Golgi organization protein 1 homolog OS=Homo sapiens OX=9606 GN=MIA3 PE=1 SV=1	100	0	NP_940953.2	transport and Golgi organization protein 1 homolog isoform 1 precursor [Homo sapiens]
P78310	case1-VS-control	-0.95995	0.128282	-7.48312	8	7.04e-05	0.00023655	None	P78310	Coxsackievirus and adenovirus receptor OS=Homo sapiens OX=9606 GN=CXADR PE=1 SV=1	100	0	NP_001329.1	coxsackievirus and adenovirus receptor isoform 1 precursor [Homo sapiens]
Q9NXW2	case1-VS-control	-1.17781	0.157554	-7.4756	8	7.09e-05	0.000238069	Down	Q9NXW2	DnaJ homolog subfamily B member 12 OS=Homo sapiens OX=9606 GN=DNAJB12 PE=1 SV=5	100	0	NP_001002762.2	dnaJ homolog subfamily B member 12 [Homo sapiens]
Q13596	case1-VS-control	0.642756	0.0861009	7.46515	8	7.16e-05	0.000240089	None	Q13596	Sorting nexin-1 OS=Homo sapiens OX=9606 GN=SNX1 PE=1 SV=3	100	0	NP_003090.2	sorting nexin-1 isoform a [Homo sapiens]
Q9H3U1	case1-VS-control	2.69224	0.360623	7.46553	8	7.16e-05	0.000240089	Up	Q9H3U1	Protein unc-45 homolog A OS=Homo sapiens OX=9606 GN=UNC45A PE=1 SV=1	100	0	NP_061141.2	protein unc-45 homolog A isoform 2 [Homo sapiens]
P28288	case1-VS-control	0.704245	0.0943822	7.46163	8	7.18e-05	0.000240542	None	P28288	ATP-binding cassette sub-family D member 3 OS=Homo sapiens OX=9606 GN=ABCD3 PE=1 SV=1	100	0	NP_002849.1	ATP-binding cassette sub-family D member 3 isoform a [Homo sapiens]
P62847	case1-VS-control	1.80346	0.241698	7.46164	8	7.18e-05	0.000240542	Up	P62847	40S ribosomal protein S24 OS=Homo sapiens OX=9606 GN=RPS24 PE=1 SV=1	100	3e-92	NP_001017.1	40S ribosomal protein S24 isoform c [Homo sapiens]
P22570	case1-VS-control	-1.49141	0.199976	-7.45794	8	7.21e-05	0.000241033	Down	P22570	NADPH:adrenodoxin oxidoreductase, mitochondrial OS=Homo sapiens OX=9606 GN=FDXR PE=1 SV=3	100	0	P22570.3	RecName: Full=NADPH:adrenodoxin oxidoreductase, mitochondrial; Short=AR; Short=Adrenodoxin reductase; AltName: Full=Ferredoxin--NADP(+) reductase; Short=Ferredoxin reductase; Flags: Precursor
Q8TEW0	case1-VS-control	-1.74661	0.181502	-9.62308	6	7.21e-05	0.000241033	Down	Q8TEW0	Partitioning defective 3 homolog OS=Homo sapiens OX=9606 GN=PARD3 PE=1 SV=2	100	0	NP_062565.2	partitioning defective 3 homolog isoform 1 [Homo sapiens]
Q9HCE1	case1-VS-control	1.09365	0.14668	7.45602	8	7.22e-05	0.000241297	Up	Q9HCE1	Putative helicase MOV-10 OS=Homo sapiens OX=9606 GN=MOV10 PE=1 SV=2	100	0	NP_066014.1	putative helicase MOV-10 isoform 1 [Homo sapiens]
P31153	case1-VS-control	4.04364	0.543775	7.43623	8	7.36e-05	0.000245706	Up	P31153	S-adenosylmethionine synthase isoform type-2 OS=Homo sapiens OX=9606 GN=MAT2A PE=1 SV=1	100	0	NP_005902.1	S-adenosylmethionine synthase isoform type-2 [Homo sapiens]
P32322	case1-VS-control	-0.944684	0.127074	-7.43414	8	7.38e-05	0.000245836	None	P32322	Pyrroline-5-carboxylate reductase 1, mitochondrial OS=Homo sapiens OX=9606 GN=PYCR1 PE=1 SV=2	100	0	NP_008838.2	pyrroline-5-carboxylate reductase 1, mitochondrial isoform 1 [Homo sapiens]
P62826	case1-VS-control	2.43135	0.32703	7.43466	8	7.37e-05	0.000245836	Up	P62826	GTP-binding nuclear protein Ran OS=Homo sapiens OX=9606 GN=RAN PE=1 SV=3	100	9e-162	ELW66979.1	GTP-binding nuclear protein Ran [Tupaia chinensis]
P48651	case1-VS-control	-0.965876	0.130008	-7.42934	8	7.41e-05	0.000246785	None	P48651	Phosphatidylserine synthase 1 OS=Homo sapiens OX=9606 GN=PTDSS1 PE=1 SV=1	100	0	NP_055569.1	phosphatidylserine synthase 1 isoform 1 [Homo sapiens]
P62280	case1-VS-control	1.53687	0.207014	7.42399	8	7.45e-05	0.000247686	Up	P62280	40S ribosomal protein S11 OS=Homo sapiens OX=9606 GN=RPS11 PE=1 SV=3	100	1e-113	XP_010991488.1	PREDICTED: 40S ribosomal protein S11 [Camelus dromedarius]
Q96ST2	case1-VS-control	0.689123	0.0928223	7.42411	8	7.45e-05	0.000247686	None	Q96ST2	Protein IWS1 homolog OS=Homo sapiens OX=9606 GN=IWS1 PE=1 SV=2	100	0	NP_060439.2	protein IWS1 homolog [Homo sapiens]
P16298	case1-VS-control	1.54775	0.208619	7.41902	8	7.48e-05	0.000248614	Up	P16298	Serine/threonine-protein phosphatase 2B catalytic subunit beta isoform OS=Homo sapiens OX=9606 GN=PPP3CB PE=1 SV=2	100	0	NP_066955.1	serine/threonine-protein phosphatase 2B catalytic subunit beta isoform isoform b [Homo sapiens]
Q53GQ0	case1-VS-control	-0.908821	0.0950735	-9.55914	6	7.49e-05	0.000248614	None	Q53GQ0	Very-long-chain 3-oxoacyl-CoA reductase OS=Homo sapiens OX=9606 GN=HSD17B12 PE=1 SV=2	100	0	NP_057226.1	very-long-chain 3-oxoacyl-CoA reductase [Homo sapiens]
P05165	case1-VS-control	-1.25857	0.169716	-7.41572	8	7.51e-05	0.000249102	Down	P05165	Propionyl-CoA carboxylase alpha chain, mitochondrial OS=Homo sapiens OX=9606 GN=PCCA PE=1 SV=4	100	0	NP_000273.2	propionyl-CoA carboxylase alpha chain, mitochondrial isoform a precursor [Homo sapiens]
O00299	case1-VS-control	3.82109	0.515464	7.4129	8	7.53e-05	0.000249593	Up	O00299	Chloride intracellular channel protein 1 OS=Homo sapiens OX=9606 GN=CLIC1 PE=1 SV=4	100	1e-178	NP_001279.2	chloride intracellular channel protein 1 [Homo sapiens]
P07108	case1-VS-control	3.90289	0.526773	7.40906	8	7.55e-05	0.000250125	Up	P07108	Acyl-CoA-binding protein OS=Homo sapiens OX=9606 GN=DBI PE=1 SV=2	100	2e-58	NP_001073331.1	acyl-CoA-binding protein isoform 3 [Homo sapiens]
P09525	case1-VS-control	4.48477	0.605399	7.40797	8	7.56e-05	0.000250125	Up	P09525	Annexin A4 OS=Homo sapiens OX=9606 GN=ANXA4 PE=1 SV=4	100	0	NP_001144.1	annexin A4 isoform a [Homo sapiens]
Q13813	case1-VS-control	-1.20328	0.162437	-7.40764	8	7.56e-05	0.000250125	Down	Q13813	Spectrin alpha chain, non-erythrocytic 1 OS=Homo sapiens OX=9606 GN=SPTAN1 PE=1 SV=3	100	0	XP_006717312.1	PREDICTED: spectrin alpha chain, non-erythrocytic 1 isoform X6 [Homo sapiens]
Q8IY81	case1-VS-control	-0.836141	0.112859	-7.40874	8	7.56e-05	0.000250125	None	Q8IY81	pre-rRNA processing protein FTSJ3 OS=Homo sapiens OX=9606 GN=FTSJ3 PE=1 SV=2	100	0	NP_060117.3	pre-rRNA processing protein FTSJ3 [Homo sapiens]
P05387	case1-VS-control	1.17585	0.158812	7.40404	8	7.59e-05	0.000250505	Up	P05387	60S acidic ribosomal protein P2 OS=Homo sapiens OX=9606 GN=RPLP2 PE=1 SV=1	100	3e-73	NP_000995.1	60S acidic ribosomal protein P2 [Homo sapiens]
P48681	case1-VS-control	-2.42371	0.294376	-8.23339	7	7.58e-05	0.000250505	Down	P48681	Nestin OS=Homo sapiens OX=9606 GN=NES PE=1 SV=2	100	0	NP_006608.1	nestin [Homo sapiens]
Q8WW12	case1-VS-control	1.16223	0.156978	7.40378	8	7.59e-05	0.000250505	Up	Q8WW12	PEST proteolytic signal-containing nuclear protein OS=Homo sapiens OX=9606 GN=PCNP PE=1 SV=2	100	5e-125	NP_065090.1	PEST proteolytic signal-containing nuclear protein isoform a [Homo sapiens]
Q27J81	case1-VS-control	1.7711	0.215214	8.22949	7	7.61e-05	0.00025077	Up	Q27J81	Inverted formin-2 OS=Homo sapiens OX=9606 GN=INF2 PE=1 SV=2	100	0	NP_071934.3	inverted formin-2 isoform 1 [Homo sapiens]
O75822	case1-VS-control	2.18052	0.294745	7.39801	8	7.63e-05	0.000251527	Up	O75822	Eukaryotic translation initiation factor 3 subunit J OS=Homo sapiens OX=9606 GN=EIF3J PE=1 SV=2	100	0	NP_003749.2	eukaryotic translation initiation factor 3 subunit J isoform 1 [Homo sapiens]
Q8NEW0	case1-VS-control	-1.56206	0.211657	-7.38014	8	7.77e-05	0.000255685	Down	Q8NEW0	Zinc transporter 7 OS=Homo sapiens OX=9606 GN=SLC30A7 PE=2 SV=1	100	0	NP_598003.2	zinc transporter 7 [Homo sapiens]
P51511	case1-VS-control	1.09526	0.148426	7.37913	8	7.77e-05	0.000255746	Up	P51511	Matrix metalloproteinase-15 OS=Homo sapiens OX=9606 GN=MMP15 PE=1 SV=1	100	0	NP_002419.1	matrix metalloproteinase-15 preproprotein [Homo sapiens]
P22314	case1-VS-control	4.28297	0.580965	7.37217	8	7.83e-05	0.000257275	Up	P22314	Ubiquitin-like modifier-activating enzyme 1 OS=Homo sapiens OX=9606 GN=UBA1 PE=1 SV=3	100	0	NP_003325.2	ubiquitin-like modifier-activating enzyme 1 [Homo sapiens]
P30050	case1-VS-control	1.10982	0.150568	7.37093	8	7.83e-05	0.000257396	Up	P30050	60S ribosomal protein L12 OS=Homo sapiens OX=9606 GN=RPL12 PE=1 SV=1	100	8e-118	XP_006074559.1	PREDICTED: 60S ribosomal protein L12 [Bubalus bubalis]
P32321	case1-VS-control	2.85617	0.348849	8.18743	7	7.86e-05	0.000257843	Up	P32321	Deoxycytidylate deaminase OS=Homo sapiens OX=9606 GN=DCTD PE=1 SV=2	100	5e-132	NP_001912.2	deoxycytidylate deaminase isoform b [Homo sapiens]
P62995	case1-VS-control	-0.800992	0.108707	-7.36836	8	7.85e-05	0.000257843	None	P62995	Transformer-2 protein homolog beta OS=Homo sapiens OX=9606 GN=TRA2B PE=1 SV=1	100	0	NP_004584.1	transformer-2 protein homolog beta isoform 1 [Homo sapiens]
O95168	case1-VS-control	-0.544835	0.0739635	-7.36627	8	7.87e-05	0.000257992	None	O95168	NADH dehydrogenase [ubiquinone] 1 beta subcomplex subunit 4 OS=Homo sapiens OX=9606 GN=NDUFB4 PE=1 SV=3	100	4e-90	NP_004538.2	NADH dehydrogenase [ubiquinone] 1 beta subcomplex subunit 4 isoform 1 [Homo sapiens]
Q8IUD2	case1-VS-control	-0.810324	0.110088	-7.3607	8	7.91e-05	0.000259189	None	Q8IUD2	ELKS/Rab6-interacting/CAST family member 1 OS=Homo sapiens OX=9606 GN=ERC1 PE=1 SV=1	100	0	NP_829884.1	ELKS/Rab6-interacting/CAST family member 1 isoform epsilon [Homo sapiens]
Q99733	case1-VS-control	3.07819	0.419033	7.34593	8	8.03e-05	0.000262707	Up	Q99733	Nucleosome assembly protein 1-like 4 OS=Homo sapiens OX=9606 GN=NAP1L4 PE=1 SV=1	100	0	NP_005960.1	nucleosome assembly protein 1-like 4 [Homo sapiens]
Q9P289	case1-VS-control	0.897939	0.122308	7.34161	8	8.06e-05	0.000263613	None	Q9P289;Q9Y6E0	Serine/threonine-protein kinase 26 OS=Homo sapiens OX=9606 GN=STK26 PE=1 SV=2	100	0	NP_057626.2	serine/threonine-protein kinase 26 isoform 1 [Homo sapiens]
Q9UNW1	case1-VS-control	-1.83955	0.25061	-7.34028	8	8.07e-05	0.000263761	Down	Q9UNW1	Multiple inositol polyphosphate phosphatase 1 OS=Homo sapiens OX=9606 GN=MINPP1 PE=1 SV=1	100	0	NP_004888.2	multiple inositol polyphosphate phosphatase 1 isoform 1 precursor [Homo sapiens]
Q15758	case1-VS-control	-0.585044	0.0797921	-7.33211	8	8.13e-05	0.000265655	None	Q15758	Neutral amino acid transporter B(0) OS=Homo sapiens OX=9606 GN=SLC1A5 PE=1 SV=2	100	0	NP_005619.1	neutral amino acid transporter B(0) isoform 1 [Homo sapiens]
O14979	case1-VS-control	-0.584114	0.0797862	-7.32099	8	8.22e-05	0.000267568	None	O14979	Heterogeneous nuclear ribonucleoprotein D-like OS=Homo sapiens OX=9606 GN=HNRNPDL PE=1 SV=3	100	0	NP_112740.1	heterogeneous nuclear ribonucleoprotein D-like isoform a [Homo sapiens]
Q12913	case1-VS-control	-1.34939	0.184337	-7.32022	8	8.23e-05	0.000267568	Down	Q12913	Receptor-type tyrosine-protein phosphatase eta OS=Homo sapiens OX=9606 GN=PTPRJ PE=1 SV=3	100	0	NP_002834.3	receptor-type tyrosine-protein phosphatase eta isoform 1 precursor [Homo sapiens]
Q6PCB5	case1-VS-control	-1.09214	0.149135	-7.32313	8	8.2e-05	0.000267568	Down	Q6PCB5	Round spermatid basic protein 1-like protein OS=Homo sapiens OX=9606 GN=RSBN1L PE=1 SV=2	100	0	NP_940869.2	round spermatid basic protein 1-like protein [Homo sapiens]
Q8NBM4	case1-VS-control	0.939321	0.128316	7.32035	8	8.23e-05	0.000267568	None	Q8NBM4	Ubiquitin-associated domain-containing protein 2 OS=Homo sapiens OX=9606 GN=UBAC2 PE=1 SV=1	100	0	NP_001137544.1	ubiquitin-associated domain-containing protein 2 isoform 1 precursor [Homo sapiens]
Q9H1E5	case1-VS-control	-1.37437	0.187664	-7.32355	8	8.2e-05	0.000267568	Down	Q9H1E5	Thioredoxin-related transmembrane protein 4 OS=Homo sapiens OX=9606 GN=TMX4 PE=1 SV=1	100	0	NP_066979.2	thioredoxin-related transmembrane protein 4 precursor [Homo sapiens]
Q9UBL3	case1-VS-control	-0.746963	0.102028	-7.32117	8	8.22e-05	0.000267568	None	Q9UBL3	Set1/Ash2 histone methyltransferase complex subunit ASH2 OS=Homo sapiens OX=9606 GN=ASH2L PE=1 SV=1	100	0	NP_004665.2	set1/Ash2 histone methyltransferase complex subunit ASH2 isoform a [Homo sapiens]
Q9UNM6	case1-VS-control	1.56463	0.213983	7.31193	8	8.29e-05	0.000269525	Up	Q9UNM6	26S proteasome non-ATPase regulatory subunit 13 OS=Homo sapiens OX=9606 GN=PSMD13 PE=1 SV=2	100	0	NP_002808.3	26S proteasome non-ATPase regulatory subunit 13 isoform 1 [Homo sapiens]
Q14966	case1-VS-control	-0.898821	0.122938	-7.31118	8	8.3e-05	0.000269527	None	Q14966	Zinc finger protein 638 OS=Homo sapiens OX=9606 GN=ZNF638 PE=1 SV=2	100	0	NP_055312.2	zinc finger protein 638 isoform 1 [Homo sapiens]
P46087	case1-VS-control	-0.864188	0.118356	-7.30159	8	8.38e-05	0.000271844	None	P46087	Probable 28S rRNA (cytosine(4447)-C(5))-methyltransferase OS=Homo sapiens OX=9606 GN=NOP2 PE=1 SV=2	100	0	NP_001245237.1	probable 28S rRNA (cytosine(4447)-C(5))-methyltransferase isoform 2 [Homo sapiens]
Q9H694	case1-VS-control	4.7096	0.0431225	109.215	2	8.38e-05	0.000271872	Up	Q9H694	Protein bicaudal C homolog 1 OS=Homo sapiens OX=9606 GN=BICC1 PE=1 SV=2	100	0	NP_001073981.1	protein bicaudal C homolog 1 [Homo sapiens]
Q13423	case1-VS-control	0.741024	0.101517	7.29953	8	8.39e-05	0.000271997	None	Q13423	NAD(P) transhydrogenase, mitochondrial OS=Homo sapiens OX=9606 GN=NNT PE=1 SV=3	100	0	NP_892022.2	NAD(P) transhydrogenase, mitochondrial isoform 1 [Homo sapiens]
Q9Y6A9	case1-VS-control	-0.768228	0.105302	-7.29551	8	8.43e-05	0.000272865	None	Q9Y6A9	Signal peptidase complex subunit 1 OS=Homo sapiens OX=9606 GN=SPCS1 PE=1 SV=4	100	2e-72	XP_003954564.3	PREDICTED: signal peptidase complex subunit 1 [Pan troglodytes]
P04818	case1-VS-control	1.12924	0.155052	7.28297	8	8.53e-05	0.000275966	Up	P04818	Thymidylate synthase OS=Homo sapiens OX=9606 GN=TYMS PE=1 SV=3	100	0	NP_001062.1	thymidylate synthase [Homo sapiens]
P40121	case1-VS-control	4.16861	0.572425	7.28236	8	8.53e-05	0.000275966	Up	P40121	Macrophage-capping protein OS=Homo sapiens OX=9606 GN=CAPG PE=1 SV=2	100	0	NP_001738.2	macrophage-capping protein isoform 1 [Homo sapiens]
P40855	case1-VS-control	1.46057	0.126532	11.5431	5	8.56e-05	0.000276588	Up	P40855	Peroxisomal biogenesis factor 19 OS=Homo sapiens OX=9606 GN=PEX19 PE=1 SV=1	100	0	NP_002848.1	peroxisomal biogenesis factor 19 isoform a [Homo sapiens]
P40925	case1-VS-control	2.91177	0.400113	7.27736	8	8.57e-05	0.000276914	Up	P40925	Malate dehydrogenase, cytoplasmic OS=Homo sapiens OX=9606 GN=MDH1 PE=1 SV=4	100	0	NP_005908.1	malate dehydrogenase, cytoplasmic isoform MDH1 [Homo sapiens]
P30511	case1-VS-control	-2.23562	0.193902	-11.5297	5	8.61e-05	0.000277756	Down	P30511	HLA class I histocompatibility antigen, alpha chain F OS=Homo sapiens OX=9606 GN=HLA-F PE=1 SV=3	100	0	CAB46623.1	major histocompatibility complex, class I, F [Homo sapiens]
P16152	case1-VS-control	1.82998	0.251726	7.26971	8	8.64e-05	0.000278537	Up	P16152	Carbonyl reductase [NADPH] 1 OS=Homo sapiens OX=9606 GN=CBR1 PE=1 SV=3	100	0	NP_001748.1	carbonyl reductase [NADPH] 1 isoform 1 [Homo sapiens]
Q9H3K6	case1-VS-control	3.52802	0.485342	7.26915	8	8.64e-05	0.000278537	Up	Q9H3K6	BolA-like protein 2 OS=Homo sapiens OX=9606 GN=BOLA2 PE=1 SV=1	100	3e-57	NP_001026997.1	bolA-like protein 2 isoform 1 [Homo sapiens]
P34896	case1-VS-control	1.95819	0.269576	7.26398	8	8.69e-05	0.000279739	Up	P34896	Serine hydroxymethyltransferase, cytosolic OS=Homo sapiens OX=9606 GN=SHMT1 PE=1 SV=1	100	0	NP_004160.3	serine hydroxymethyltransferase, cytosolic isoform 1 [Homo sapiens]
Q16718	case1-VS-control	-0.826819	0.11391	-7.25853	8	8.73e-05	0.000281026	None	Q16718	NADH dehydrogenase [ubiquinone] 1 alpha subcomplex subunit 5 OS=Homo sapiens OX=9606 GN=NDUFA5 PE=1 SV=3	100	1e-78	NP_004991.1	NADH dehydrogenase [ubiquinone] 1 alpha subcomplex subunit 5 isoform 1 [Homo sapiens]
O43598	case1-VS-control	4.25026	0.585654	7.25729	8	8.74e-05	0.000281165	Up	O43598	2'-deoxynucleoside 5'-phosphate N-hydrolase 1 OS=Homo sapiens OX=9606 GN=DNPH1 PE=1 SV=1	100	2e-122	NP_006434.1	2'-deoxynucleoside 5'-phosphate N-hydrolase 1 isoform 1 [Homo sapiens]
Q9BYC9	case1-VS-control	-2.07291	0.28585	-7.25175	8	8.79e-05	0.000282482	Down	Q9BYC9	39S ribosomal protein L20, mitochondrial OS=Homo sapiens OX=9606 GN=MRPL20 PE=1 SV=1	100	1e-106	NP_060441.2	39S ribosomal protein L20, mitochondrial isoform 1 [Homo sapiens]
Q5H9R7	case1-VS-control	2.81996	0.389002	7.24922	8	8.81e-05	0.000282978	Up	Q5H9R7	Serine/threonine-protein phosphatase 6 regulatory subunit 3 OS=Homo sapiens OX=9606 GN=PPP6R3 PE=1 SV=2	100	0	NP_001157633.1	serine/threonine-protein phosphatase 6 regulatory subunit 3 isoform 6 [Homo sapiens]
P20073	case1-VS-control	3.53514	0.487899	7.24564	8	8.84e-05	0.000283367	Up	P20073	Annexin A7 OS=Homo sapiens OX=9606 GN=ANXA7 PE=1 SV=3	100	0	NP_004025.1	annexin A7 isoform 2 [Homo sapiens]
Q3YEC7	case1-VS-control	1.71407	0.236543	7.24634	8	8.84e-05	0.000283367	Up	Q3YEC7	Rab-like protein 6 OS=Homo sapiens OX=9606 GN=RABL6 PE=1 SV=2	100	0	NP_078994.3	rab-like protein 6 isoform 1 [Homo sapiens]
Q7Z5L9	case1-VS-control	0.765597	0.10565	7.24654	8	8.84e-05	0.000283367	None	Q7Z5L9	Interferon regulatory factor 2-binding protein 2 OS=Homo sapiens OX=9606 GN=IRF2BP2 PE=1 SV=2	100	0	NP_892017.2	interferon regulatory factor 2-binding protein 2 isoform A [Homo sapiens]
P25705	case1-VS-control	-0.729485	0.100698	-7.24431	8	8.85e-05	0.000283534	None	P25705	ATP synthase subunit alpha, mitochondrial OS=Homo sapiens OX=9606 GN=ATP5F1A PE=1 SV=1	100	0	NP_004037.1	ATP synthase subunit alpha, mitochondrial isoform a precursor [Homo sapiens]
Q9BQ52	case1-VS-control	0.732831	0.101209	7.24079	8	8.88e-05	0.000284306	None	Q9BQ52	Zinc phosphodiesterase ELAC protein 2 OS=Homo sapiens OX=9606 GN=ELAC2 PE=1 SV=2	100	0	NP_060597.4	zinc phosphodiesterase ELAC protein 2 isoform 1 [Homo sapiens]
Q7Z5Y7	case1-VS-control	-5.1248	0.552997	-9.26732	6	8.92e-05	0.000285346	Down	Q7Z5Y7	BTB/POZ domain-containing protein KCTD20 OS=Homo sapiens OX=9606 GN=KCTD20 PE=1 SV=1	100	0	NP_775833.2	BTB/POZ domain-containing protein KCTD20 isoform a [Homo sapiens]
O75367	case1-VS-control	-2.47413	0.342281	-7.22837	8	8.99e-05	0.000287364	Down	O75367	Core histone macro-H2A.1 OS=Homo sapiens OX=9606 GN=H2AFY PE=1 SV=4	100	0	NP_613258.2	core histone macro-H2A.1 isoform 3 [Homo sapiens]
O15173	case1-VS-control	-1.5239	0.210994	-7.22248	8	9.04e-05	0.000288814	Down	O15173	Membrane-associated progesterone receptor component 2 OS=Homo sapiens OX=9606 GN=PGRMC2 PE=1 SV=1	100	5e-159	O15173.1	RecName: Full=Membrane-associated progesterone receptor component 2; AltName: Full=Progesterone membrane-binding protein; AltName: Full=Steroid receptor protein DG6
Q9Y605	case1-VS-control	-1.19376	0.165383	-7.21814	8	9.08e-05	0.000289835	Down	Q9Y605	MORF4 family-associated protein 1 OS=Homo sapiens OX=9606 GN=MRFAP1 PE=1 SV=1	100	1e-85	NP_150638.1	MORF4 family-associated protein 1 isoform a [Homo sapiens]
Q86WX3	case1-VS-control	0.573505	0.0794794	7.21577	8	9.1e-05	0.000290303	None	Q86WX3	Active regulator of SIRT1 OS=Homo sapiens OX=9606 GN=RPS19BP1 PE=1 SV=1	100	4e-94	NP_919307.1	active regulator of SIRT1 [Homo sapiens]
P03905	case1-VS-control	-1.09356	0.151587	-7.21412	8	9.12e-05	0.000290567	Down	P03905	NADH-ubiquinone oxidoreductase chain 4 OS=Homo sapiens OX=9606 GN=MT-ND4 PE=1 SV=1	100	0	BAM25209.1	NADH dehydrogenase subunit 4 (mitochondrion) [Homo sapiens]
Q9HD42	case1-VS-control	-1.83737	0.254759	-7.21217	8	9.14e-05	0.000290917	Down	Q9HD42	Charged multivesicular body protein 1a OS=Homo sapiens OX=9606 GN=CHMP1A PE=1 SV=1	100	4e-139	NP_002759.2	charged multivesicular body protein 1a isoform 2 [Homo sapiens]
Q8NBJ5	case1-VS-control	-0.791286	0.109853	-7.20311	8	9.22e-05	0.000293299	None	Q8NBJ5	Procollagen galactosyltransferase 1 OS=Homo sapiens OX=9606 GN=COLGALT1 PE=1 SV=1	100	0	NP_078932.2	procollagen galactosyltransferase 1 precursor [Homo sapiens]
Q9H4G0	case1-VS-control	1.61443	0.224259	7.19898	8	9.25e-05	0.000294279	Up	Q9H4G0	Band 4.1-like protein 1 OS=Homo sapiens OX=9606 GN=EPB41L1 PE=1 SV=2	100	0	NP_036288.2	band 4.1-like protein 1 isoform a [Homo sapiens]
Q15291	case1-VS-control	-0.68999	0.0958933	-7.19539	8	9.29e-05	0.000295106	None	Q15291	Retinoblastoma-binding protein 5 OS=Homo sapiens OX=9606 GN=RBBP5 PE=1 SV=2	100	0	NP_005048.2	retinoblastoma-binding protein 5 isoform 1 [Homo sapiens]
Q9H7Z3	case1-VS-control	-1.60846	0.201697	-7.97464	7	9.3e-05	0.000295369	Down	Q9H7Z3	Protein NRDE2 homolog OS=Homo sapiens OX=9606 GN=NRDE2 PE=1 SV=3	100	0	NP_060440.2	protein NRDE2 homolog [Homo sapiens]
Q8NCW5	case1-VS-control	0.37268	0.0518204	7.19177	8	9.32e-05	0.000295742	None	Q8NCW5	NAD(P)H-hydrate epimerase OS=Homo sapiens OX=9606 GN=NAXE PE=1 SV=2	100	0	NP_658985.2	NAD(P)H-hydrate epimerase precursor [Homo sapiens]
P46783	case1-VS-control	2.38721	0.332048	7.18935	8	9.34e-05	0.000296189	Up	P46783	40S ribosomal protein S10 OS=Homo sapiens OX=9606 GN=RPS10 PE=1 SV=1	100	2e-119	XP_017518592.1	PREDICTED: 40S ribosomal protein S10 [Manis javanica]
Q9NPQ8	case1-VS-control	1.92114	0.209009	9.19163	6	9.35e-05	0.000296189	Up	Q9NPQ8	Synembryn-A OS=Homo sapiens OX=9606 GN=RIC8A PE=1 SV=3	100	0	NP_001273063.1	synembryn-A isoform 2 [Homo sapiens]
P61081	case1-VS-control	1.6731	0.232898	7.18381	8	9.39e-05	0.000297225	Up	P61081	NEDD8-conjugating enzyme Ubc12 OS=Homo sapiens OX=9606 GN=UBE2M PE=1 SV=1	100	4e-135	XP_011931728.1	PREDICTED: NEDD8-conjugating enzyme Ubc12 [Cercocebus atys]
Q9HC38	case1-VS-control	2.8724	0.399831	7.18404	8	9.39e-05	0.000297225	Up	Q9HC38	Glyoxalase domain-containing protein 4 OS=Homo sapiens OX=9606 GN=GLOD4 PE=1 SV=1	100	0	Q9HC38.1	RecName: Full=Glyoxalase domain-containing protein 4
P41091	case1-VS-control	2.45679	0.342073	7.18204	8	9.41e-05	0.000297534	Up	P41091	Eukaryotic translation initiation factor 2 subunit 3 OS=Homo sapiens OX=9606 GN=EIF2S3 PE=1 SV=3	100	0	NP_001406.1	eukaryotic translation initiation factor 2 subunit 3 [Homo sapiens]
Q969Q5	case1-VS-control	-2.68709	0.374273	-7.17951	8	9.43e-05	0.000298067	Down	Q969Q5	Ras-related protein Rab-24 OS=Homo sapiens OX=9606 GN=RAB24 PE=1 SV=1	100	3e-150	NP_001026847.1	ras-related protein Rab-24 [Homo sapiens]
P27635	case1-VS-control	1.25573	0.174939	7.17809	8	9.45e-05	0.000298275	Up	P27635	60S ribosomal protein L10 OS=Homo sapiens OX=9606 GN=RPL10 PE=1 SV=4	100	4e-159	XP_006167047.1	PREDICTED: 60S ribosomal protein L10 isoform X1 [Tupaia chinensis]
O60763	case1-VS-control	2.04598	0.285148	7.17516	8	9.47e-05	0.000298926	Up	O60763	General vesicular transport factor p115 OS=Homo sapiens OX=9606 GN=USO1 PE=1 SV=2	100	0	NP_003706.2	general vesicular transport factor p115 isoform 2 [Homo sapiens]
Q9Y4B6	case1-VS-control	-0.950953	0.132602	-7.17146	8	9.51e-05	0.000299802	None	Q9Y4B6	DDB1- and CUL4-associated factor 1 OS=Homo sapiens OX=9606 GN=DCAF1 PE=1 SV=3	100	0	NP_055518.1	DDB1- and CUL4-associated factor 1 isoform 1 [Homo sapiens]
Q6PJT7	case1-VS-control	-1.35108	0.188589	-7.16417	8	9.58e-05	0.000301743	Down	Q6PJT7	Zinc finger CCCH domain-containing protein 14 OS=Homo sapiens OX=9606 GN=ZC3H14 PE=1 SV=1	100	0	NP_079100.2	zinc finger CCCH domain-containing protein 14 isoform 1 [Homo sapiens]
P49914	case1-VS-control	-1.87971	0.262547	-7.15954	8	9.62e-05	0.00030291	Down	P49914	5-formyltetrahydrofolate cyclo-ligase OS=Homo sapiens OX=9606 GN=MTHFS PE=1 SV=2	100	4e-150	NP_006432.1	5-formyltetrahydrofolate cyclo-ligase isoform a [Homo sapiens]
P04406	case1-VS-control	0.714907	0.0998825	7.15748	8	9.64e-05	0.000303103	None	P04406	Glyceraldehyde-3-phosphate dehydrogenase OS=Homo sapiens OX=9606 GN=GAPDH PE=1 SV=3	99.403	0	XP_003273771.1	PREDICTED: glyceraldehyde-3-phosphate dehydrogenase isoform X1 [Nomascus leucogenys]
Q9Y512	case1-VS-control	1.30305	0.182042	7.15795	8	9.63e-05	0.000303103	Up	Q9Y512	Sorting and assembly machinery component 50 homolog OS=Homo sapiens OX=9606 GN=SAMM50 PE=1 SV=3	100	0	NP_056195.3	sorting and assembly machinery component 50 homolog [Homo sapiens]
P82663	case1-VS-control	-1.38497	0.193585	-7.15433	8	9.67e-05	0.000303831	Down	P82663	28S ribosomal protein S25, mitochondrial OS=Homo sapiens OX=9606 GN=MRPS25 PE=1 SV=1	100	3e-127	NP_071942.1	28S ribosomal protein S25, mitochondrial [Homo sapiens]
Q9BXW9	case1-VS-control	-1.37281	0.191977	-7.15088	8	9.7e-05	0.000304653	Down	Q9BXW9	Fanconi anemia group D2 protein OS=Homo sapiens OX=9606 GN=FANCD2 PE=1 SV=2	100	0	NP_001018125.1	Fanconi anemia group D2 protein isoform b [Homo sapiens]
O00459	case1-VS-control	2.03641	0.181086	11.2456	5	9.71e-05	0.000304783	Up	O00459	Phosphatidylinositol 3-kinase regulatory subunit beta OS=Homo sapiens OX=9606 GN=PIK3R2 PE=1 SV=2	100	0	O00459.2	RecName: Full=Phosphatidylinositol 3-kinase regulatory subunit beta; Short=PI3-kinase regulatory subunit beta; Short=PI3K regulatory subunit beta; Short=PtdIns-3-kinase regulatory subunit beta; AltName: Full=Phosphatidylinositol 3-kinase 85 kDa regulatory subunit beta; Short=PI3-kinase subunit p85-beta; Short=PtdIns-3-kinase regulatory subunit p85-beta
Q8WUH6	case1-VS-control	-0.799057	0.111863	-7.1432	8	9.77e-05	0.000306538	None	Q8WUH6	Transmembrane protein 263 OS=Homo sapiens OX=9606 GN=TMEM263 PE=1 SV=1	100	2e-76	NP_689474.1	transmembrane protein 263 isoform a [Homo sapiens]
Q92797	case1-VS-control	-1.1517	0.161248	-7.14239	8	9.78e-05	0.000306572	Down	Q92797	Symplekin OS=Homo sapiens OX=9606 GN=SYMPK PE=1 SV=2	100	0	NP_004810.2	symplekin [Homo sapiens]
Q9Y678	case1-VS-control	2.31994	0.324881	7.14089	8	9.8e-05	0.000306815	Up	Q9Y678	Coatomer subunit gamma-1 OS=Homo sapiens OX=9606 GN=COPG1 PE=1 SV=1	100	0	NP_057212.1	coatomer subunit gamma-1 [Homo sapiens]
O15212	case1-VS-control	2.45059	0.343474	7.13473	8	9.86e-05	0.000308043	Up	O15212	Prefoldin subunit 6 OS=Homo sapiens OX=9606 GN=PFDN6 PE=1 SV=1	100	5e-85	NP_055075.1	prefoldin subunit 6 [Homo sapiens]
Q9UKV8	case1-VS-control	1.32455	0.185635	7.13521	8	9.85e-05	0.000308043	Up	Q9UKV8	Protein argonaute-2 OS=Homo sapiens OX=9606 GN=AGO2 PE=1 SV=3	100	0	NP_036286.2	protein argonaute-2 isoform 1 [Homo sapiens]
Q9Y3E5	case1-VS-control	-0.909179	0.127409	-7.13591	8	9.84e-05	0.000308043	None	Q9Y3E5	Peptidyl-tRNA hydrolase 2, mitochondrial OS=Homo sapiens OX=9606 GN=PTRH2 PE=1 SV=1	100	2e-129	NP_001015509.1	peptidyl-tRNA hydrolase 2, mitochondrial isoform a [Homo sapiens]
O75410	case1-VS-control	-1.66182	0.232947	-7.13388	8	9.86e-05	0.000308068	Down	O75410	Transforming acidic coiled-coil-containing protein 1 OS=Homo sapiens OX=9606 GN=TACC1 PE=1 SV=2	100	0	NP_001339707.1	transforming acidic coiled-coil-containing protein 1 isoform 5 [Homo sapiens]
P16930	case1-VS-control	2.69219	0.240204	11.2079	5	9.87e-05	0.000308068	Up	P16930	Fumarylacetoacetase OS=Homo sapiens OX=9606 GN=FAH PE=1 SV=2	100	0	NP_000128.1	fumarylacetoacetase [Homo sapiens]
P48739	case1-VS-control	1.94811	0.273463	7.12385	8	9.96e-05	0.000310236	Up	P48739	Phosphatidylinositol transfer protein beta isoform OS=Homo sapiens OX=9606 GN=PITPNB PE=1 SV=2	100	0	NP_036531.1	phosphatidylinositol transfer protein beta isoform isoform 1 [Homo sapiens]
Q8IYB8	case1-VS-control	0.803366	0.112779	7.12336	8	9.97e-05	0.000310236	None	Q8IYB8	ATP-dependent RNA helicase SUPV3L1, mitochondrial OS=Homo sapiens OX=9606 GN=SUPV3L1 PE=1 SV=1	100	0	NP_003162.2	ATP-dependent RNA helicase SUPV3L1, mitochondrial isoform 1 [Homo sapiens]
Q8TB40	case1-VS-control	-1.9147	0.242695	-7.88933	7	9.96e-05	0.000310236	Down	Q8TB40	Protein ABHD4 OS=Homo sapiens OX=9606 GN=ABHD4 PE=2 SV=1	100	0	NP_071343.2	protein ABHD4 [Homo sapiens]
Q9BZH6	case1-VS-control	2.33819	0.328226	7.12371	8	9.96e-05	0.000310236	Up	Q9BZH6	WD repeat-containing protein 11 OS=Homo sapiens OX=9606 GN=WDR11 PE=1 SV=1	100	0	NP_060587.8	WD repeat-containing protein 11 [Homo sapiens]
Q16881	case1-VS-control	2.28964	0.321474	7.12232	8	9.98e-05	0.000310341	Up	Q16881	Thioredoxin reductase 1, cytoplasmic OS=Homo sapiens OX=9606 GN=TXNRD1 PE=1 SV=3	100	0	NP_001087240.1	thioredoxin reductase 1, cytoplasmic isoform 5 [Homo sapiens]
Q96QC0	case1-VS-control	-0.986893	0.125253	-7.87918	7	0.000100438	0.0003122	None	Q96QC0	Serine/threonine-protein phosphatase 1 regulatory subunit 10 OS=Homo sapiens OX=9606 GN=PPP1R10 PE=1 SV=1	100	0	NP_002705.2	serine/threonine-protein phosphatase 1 regulatory subunit 10 [Homo sapiens]
P57772	case1-VS-control	1.30324	0.183267	7.11115	8	0.000100876	0.000312922	Up	P57772	Selenocysteine-specific elongation factor OS=Homo sapiens OX=9606 GN=EEFSEC PE=1 SV=4	100	0	NP_068756.2	selenocysteine-specific elongation factor [Homo sapiens]
Q13686	case1-VS-control	-0.764927	0.107566	-7.11126	8	0.000100865	0.000312922	None	Q13686	Nucleic acid dioxygenase ALKBH1 OS=Homo sapiens OX=9606 GN=ALKBH1 PE=1 SV=2	100	0	NP_006011.2	nucleic acid dioxygenase ALKBH1 [Homo sapiens]
Q6NUM9	case1-VS-control	0.81797	0.115019	7.11158	8	0.000100834	0.000312922	None	Q6NUM9	All-trans-retinol 13,14-reductase OS=Homo sapiens OX=9606 GN=RETSAT PE=1 SV=2	100	0	NP_060220.3	all-trans-retinol 13,14-reductase precursor [Homo sapiens]
P26373	case1-VS-control	0.822405	0.115756	7.10466	8	0.000101524	0.000314718	None	P26373	60S ribosomal protein L13 OS=Homo sapiens OX=9606 GN=RPL13 PE=1 SV=4	100	7e-151	NP_150254.1	60S ribosomal protein L13 isoform 1 [Homo sapiens]
O95169	case1-VS-control	-0.431742	0.0607906	-7.10211	8	0.00010178	0.000315298	None	O95169	NADH dehydrogenase [ubiquinone] 1 beta subcomplex subunit 8, mitochondrial OS=Homo sapiens OX=9606 GN=NDUFB8 PE=1 SV=1	100	2e-137	NP_004995.1	NADH dehydrogenase [ubiquinone] 1 beta subcomplex subunit 8, mitochondrial isoform 1 precursor [Homo sapiens]
P78357	case1-VS-control	-1.95876	0.275864	-7.10045	8	0.000101948	0.000315602	Down	P78357	Contactin-associated protein 1 OS=Homo sapiens OX=9606 GN=CNTNAP1 PE=1 SV=1	100	0	NP_003623.1	contactin-associated protein 1 precursor [Homo sapiens]
P36871	case1-VS-control	4.46608	0.629269	7.09725	8	0.00010227	0.000316172	Up	P36871	Phosphoglucomutase-1 OS=Homo sapiens OX=9606 GN=PGM1 PE=1 SV=3	100	0	NP_002624.2	phosphoglucomutase-1 isoform 1 [Homo sapiens]
Q9NRF8	case1-VS-control	3.22815	0.454805	7.09789	8	0.000102206	0.000316172	Up	Q9NRF8	CTP synthase 2 OS=Homo sapiens OX=9606 GN=CTPS2 PE=1 SV=1	100	0	NP_062831.3	CTP synthase 2 [Homo sapiens]
P21127	case1-VS-control	1.8423	0.25965	7.09531	8	0.000102466	0.000316562	Up	P21127	Cyclin-dependent kinase 11B OS=Homo sapiens OX=9606 GN=CDK11B PE=1 SV=4	100	0	NP_001778.2	cyclin-dependent kinase 11B isoform 1 [Homo sapiens]
O43707	case1-VS-control	1.44614	0.204072	7.08642	8	0.000103371	0.000318934	Up	O43707	Alpha-actinin-4 OS=Homo sapiens OX=9606 GN=ACTN4 PE=1 SV=2	100	0	NP_004915.2	alpha-actinin-4 isoform 1 [Homo sapiens]
P61803	case1-VS-control	-0.668892	0.0943911	-7.08639	8	0.000103374	0.000318934	None	P61803	Dolichyl-diphosphooligosaccharide--protein glycosyltransferase subunit DAD1 OS=Homo sapiens OX=9606 GN=DAD1 PE=1 SV=3	100	1e-75	NP_001335.1	dolichyl-diphosphooligosaccharide--protein glycosyltransferase subunit DAD1 [Homo sapiens]
P17858	case1-VS-control	1.43334	0.20237	7.08278	8	0.000103744	0.000319642	Up	P17858	ATP-dependent 6-phosphofructokinase, liver type OS=Homo sapiens OX=9606 GN=PFKL PE=1 SV=6	99.872	0	XP_004062942.1	PREDICTED: ATP-dependent 6-phosphofructokinase, liver type [Gorilla gorilla gorilla]
Q12874	case1-VS-control	-0.735674	0.103859	-7.08339	8	0.000103681	0.000319642	None	Q12874	Splicing factor 3A subunit 3 OS=Homo sapiens OX=9606 GN=SF3A3 PE=1 SV=1	99.8	0	ELK01944.1	Type II inositol-1,4,5-trisphosphate 5-phosphatase [Pteropus alecto]
P55209	case1-VS-control	3.15152	0.445297	7.07734	8	0.000104304	0.000321151	Up	P55209	Nucleosome assembly protein 1-like 1 OS=Homo sapiens OX=9606 GN=NAP1L1 PE=1 SV=1	100	0	NP_004528.1	nucleosome assembly protein 1-like 1 isoform 1 [Homo sapiens]
P62269	case1-VS-control	1.64903	0.233075	7.07511	8	0.000104534	0.000321644	Up	P62269	40S ribosomal protein S18 OS=Homo sapiens OX=9606 GN=RPS18 PE=1 SV=3	100	6e-107	XP_003271942.1	PREDICTED: 40S ribosomal protein S18 [Nomascus leucogenys]
O75150	case1-VS-control	1.63854	0.209634	7.81617	7	0.000105703	0.000325005	Up	O75150	E3 ubiquitin-protein ligase BRE1B OS=Homo sapiens OX=9606 GN=RNF40 PE=1 SV=5	100	0	NP_055586.1	E3 ubiquitin-protein ligase BRE1B isoform 1 [Homo sapiens]
Q14160	case1-VS-control	-0.991841	0.140423	-7.06326	8	0.000105769	0.000325005	None	Q14160	Protein scribble homolog OS=Homo sapiens OX=9606 GN=SCRIB PE=1 SV=4	100	0	Q14160.4	RecName: Full=Protein scribble homolog; Short=Scribble; Short=hScrib; AltName: Full=Protein LAP4
Q99436	case1-VS-control	2.02396	0.286993	7.05231	8	0.000106924	0.000328331	Up	Q99436	Proteasome subunit beta type-7 OS=Homo sapiens OX=9606 GN=PSMB7 PE=1 SV=1	100	0	NP_002790.1	proteasome subunit beta type-7 precursor [Homo sapiens]
Q9UHG3	case1-VS-control	-1.13061	0.160407	-7.04836	8	0.000107344	0.000329401	Down	Q9UHG3	Prenylcysteine oxidase 1 OS=Homo sapiens OX=9606 GN=PCYOX1 PE=1 SV=3	100	0	NP_057381.3	prenylcysteine oxidase 1 precursor [Homo sapiens]
P54578	case1-VS-control	1.61798	0.229708	7.04363	8	0.00010785	0.00033073	Up	P54578	Ubiquitin carboxyl-terminal hydrolase 14 OS=Homo sapiens OX=9606 GN=USP14 PE=1 SV=3	100	0	NP_005142.1	ubiquitin carboxyl-terminal hydrolase 14 isoform a [Homo sapiens]
Q9UHR5	case1-VS-control	2.00763	0.285107	7.04166	8	0.000108061	0.000331156	Up	Q9UHR5	SAP30-binding protein OS=Homo sapiens OX=9606 GN=SAP30BP PE=1 SV=1	100	0	NP_037392.1	SAP30-binding protein isoform 2 [Homo sapiens]
P10155	case1-VS-control	1.76962	0.251678	7.03127	8	0.000109183	0.00033417	Up	P10155	60 kDa SS-A/Ro ribonucleoprotein OS=Homo sapiens OX=9606 GN=TROVE2 PE=1 SV=2	100	0	NP_004591.2	60 kDa SS-A/Ro ribonucleoprotein isoform 2 [Homo sapiens]
Q9Y5Y2	case1-VS-control	3.40598	0.48441	7.03119	8	0.000109191	0.00033417	Up	Q9Y5Y2	Cytosolic Fe-S cluster assembly factor NUBP2 OS=Homo sapiens OX=9606 GN=NUBP2 PE=1 SV=1	100	0	NP_036357.1	cytosolic Fe-S cluster assembly factor NUBP2 isoform 1 [Homo sapiens]
Q7Z6Z7	case1-VS-control	3.19631	0.357583	8.93865	6	0.000109409	0.00033461	Up	Q7Z6Z7	E3 ubiquitin-protein ligase HUWE1 OS=Homo sapiens OX=9606 GN=HUWE1 PE=1 SV=3	100	0	NP_113584.3	E3 ubiquitin-protein ligase HUWE1 [Homo sapiens]
P12429	case1-VS-control	3.96827	0.564711	7.02708	8	0.000109639	0.000335088	Up	P12429	Annexin A3 OS=Homo sapiens OX=9606 GN=ANXA3 PE=1 SV=3	100	0	NP_005130.1	annexin A3 [Homo sapiens]
Q9BUH6	case1-VS-control	1.43436	0.204183	7.02488	8	0.000109879	0.000335598	Up	Q9BUH6	Protein PAXX OS=Homo sapiens OX=9606 GN=PAXX PE=1 SV=2	100	1e-141	NP_899064.1	protein PAXX isoform 2 [Homo sapiens]
Q9BUM1	case1-VS-control	-1.75223	0.249694	-7.01751	8	0.000110689	0.000337846	Down	Q9BUM1	Glucose-6-phosphatase 3 OS=Homo sapiens OX=9606 GN=G6PC3 PE=1 SV=2	100	0	NP_612396.1	glucose-6-phosphatase 3 isoform 1 [Homo sapiens]
Q9H330	case1-VS-control	-1.88401	0.268522	-7.01621	8	0.000110832	0.000338057	Down	Q9H330	Transmembrane protein 245 OS=Homo sapiens OX=9606 GN=TMEM245 PE=1 SV=3	100	0	NP_114401.2	transmembrane protein 245 [Homo sapiens]
Q9P0V9	case1-VS-control	-0.924815	0.131834	-7.01501	8	0.000110965	0.000338234	None	Q9P0V9	Septin-10 OS=Homo sapiens OX=9606 GN=SEPT10 PE=1 SV=2	100	0	NP_653311.1	septin-10 isoform 1 [Homo sapiens]
Q8IY37	case1-VS-control	-1.09784	0.156653	-7.0081	8	0.000111732	0.000340119	Down	Q8IY37	Probable ATP-dependent RNA helicase DHX37 OS=Homo sapiens OX=9606 GN=DHX37 PE=1 SV=1	100	0	NP_116045.2	probable ATP-dependent RNA helicase DHX37 [Homo sapiens]
Q9Y2K7	case1-VS-control	-1.79339	0.231453	-7.74839	7	0.000111717	0.000340119	Down	Q9Y2K7	Lysine-specific demethylase 2A OS=Homo sapiens OX=9606 GN=KDM2A PE=1 SV=3	100	0	NP_036440.1	lysine-specific demethylase 2A isoform a [Homo sapiens]
O95674	case1-VS-control	-2.08452	0.19093	-10.9177	5	0.000112041	0.000340831	Down	O95674	Phosphatidate cytidylyltransferase 2 OS=Homo sapiens OX=9606 GN=CDS2 PE=1 SV=1	100	0	NP_003809.1	phosphatidate cytidylyltransferase 2 [Homo sapiens]
Q9BU23	case1-VS-control	-2.87674	0.32325	-8.89942	6	0.000112152	0.000340942	Down	Q9BU23	Lipase maturation factor 2 OS=Homo sapiens OX=9606 GN=LMF2 PE=1 SV=2	100	0	NP_149977.2	lipase maturation factor 2 [Homo sapiens]
P82909	case1-VS-control	-1.11553	0.1593	-7.00269	8	0.000112336	0.000341275	Down	P82909	28S ribosomal protein S36, mitochondrial OS=Homo sapiens OX=9606 GN=MRPS36 PE=1 SV=2	100	1e-69	NP_150597.1	28S ribosomal protein S36, mitochondrial [Homo sapiens]
P49137	case1-VS-control	2.34773	0.155679	15.0805	4	0.000112683	0.000342101	Up	P49137	MAP kinase-activated protein kinase 2 OS=Homo sapiens OX=9606 GN=MAPKAPK2 PE=1 SV=1	100	0	NP_116584.2	MAP kinase-activated protein kinase 2 isoform 2 [Homo sapiens]
Q9NVZ3	case1-VS-control	-1.1134	0.159122	-6.9971	8	0.000112965	0.000342728	Down	Q9NVZ3	Adaptin ear-binding coat-associated protein 2 OS=Homo sapiens OX=9606 GN=NECAP2 PE=1 SV=1	100	0	NP_060560.1	adaptin ear-binding coat-associated protein 2 isoform 1 [Homo sapiens]
Q96HV5	case1-VS-control	-0.75061	0.107292	-6.99596	8	0.000113094	0.000342892	None	Q96HV5	Transmembrane protein 41A OS=Homo sapiens OX=9606 GN=TMEM41A PE=1 SV=1	100	0	NP_542383.1	transmembrane protein 41A precursor [Homo sapiens]
P15311	case1-VS-control	2.45779	0.351389	6.99449	8	0.00011326	0.000343168	Up	P15311	Ezrin OS=Homo sapiens OX=9606 GN=EZR PE=1 SV=4	100	0	NP_003370.2	ezrin [Homo sapiens]
Q9Y5K5	case1-VS-control	1.53633	0.219778	6.99037	8	0.000113727	0.000344354	Up	Q9Y5K5	Ubiquitin carboxyl-terminal hydrolase isozyme L5 OS=Homo sapiens OX=9606 GN=UCHL5 PE=1 SV=3	100	0	NP_057068.1	ubiquitin carboxyl-terminal hydrolase isozyme L5 isoform 1 [Homo sapiens]
P62851	case1-VS-control	2.17097	0.310908	6.98267	8	0.000114606	0.000346554	Up	P62851	40S ribosomal protein S25 OS=Homo sapiens OX=9606 GN=RPS25 PE=1 SV=1	100	6e-83	NP_001019.1	40S ribosomal protein S25 [Homo sapiens]
Q7Z2Z2	case1-VS-control	1.77437	0.254105	6.98285	8	0.000114586	0.000346554	Up	Q7Z2Z2	Elongation factor-like GTPase 1 OS=Homo sapiens OX=9606 GN=EFL1 PE=1 SV=2	100	0	NP_078856.4	elongation factor-like GTPase 1 isoform 1 [Homo sapiens]
P40429	case1-VS-control	0.906226	0.129807	6.98135	8	0.000114758	0.000346782	None	P40429	60S ribosomal protein L13a OS=Homo sapiens OX=9606 GN=RPL13A PE=1 SV=2	100	3e-145	NP_036555.1	60S ribosomal protein L13a isoform 1 [Homo sapiens]
O00411	case1-VS-control	-2.21953	0.28771	-7.71447	7	0.000114871	0.000346857	Down	O00411	DNA-directed RNA polymerase, mitochondrial OS=Homo sapiens OX=9606 GN=POLRMT PE=1 SV=2	100	0	NP_005026.3	DNA-directed RNA polymerase, mitochondrial precursor [Homo sapiens]
P60900	case1-VS-control	1.92708	0.276093	6.97981	8	0.000114934	0.000346857	Up	P60900	Proteasome subunit alpha type-6 OS=Homo sapiens OX=9606 GN=PSMA6 PE=1 SV=1	100	0	NP_058979.1	proteasome subunit alpha type-6 [Rattus norvegicus]
Q9BTC8	case1-VS-control	-0.81613	0.117057	-6.97207	8	0.000115827	0.000349321	None	Q9BTC8	Metastasis-associated protein MTA3 OS=Homo sapiens OX=9606 GN=MTA3 PE=1 SV=2	100	0	NP_001317371.1	metastasis-associated protein MTA3 isoform c [Homo sapiens]
P06733	case1-VS-control	3.83874	0.551022	6.96658	8	0.000116466	0.000350783	Up	P06733	Alpha-enolase OS=Homo sapiens OX=9606 GN=ENO1 PE=1 SV=2	100	0	NP_001419.1	alpha-enolase isoform 1 [Homo sapiens]
P36405	case1-VS-control	2.81617	0.188303	14.9555	4	0.000116443	0.000350783	Up	P36405	ADP-ribosylation factor-like protein 3 OS=Homo sapiens OX=9606 GN=ARL3 PE=1 SV=2	100	3e-132	NP_004302.1	ADP-ribosylation factor-like protein 3 [Homo sapiens]
O95394	case1-VS-control	2.13299	0.241489	8.83266	6	0.000117006	0.000352039	Up	O95394	Phosphoacetylglucosamine mutase OS=Homo sapiens OX=9606 GN=PGM3 PE=1 SV=1	100	0	NP_056414.1	phosphoacetylglucosamine mutase isoform 2 [Homo sapiens]
P30419	case1-VS-control	3.01882	0.433632	6.96169	8	0.000117038	0.000352039	Up	P30419	Glycylpeptide N-tetradecanoyltransferase 1 OS=Homo sapiens OX=9606 GN=NMT1 PE=1 SV=2	100	0	NP_066565.1	glycylpeptide N-tetradecanoyltransferase 1 [Homo sapiens]
Q7L592	case1-VS-control	-1.38863	0.199562	-6.95838	8	0.000117428	0.000352979	Down	Q7L592	Protein arginine methyltransferase NDUFAF7, mitochondrial OS=Homo sapiens OX=9606 GN=NDUFAF7 PE=1 SV=1	100	0	NP_653337.1	protein arginine methyltransferase NDUFAF7, mitochondrial isoform 1 [Homo sapiens]
P25789	case1-VS-control	1.72852	0.248516	6.95538	8	0.000117781	0.00035381	Up	P25789	Proteasome subunit alpha type-4 OS=Homo sapiens OX=9606 GN=PSMA4 PE=1 SV=1	100	0	NP_002780.1	proteasome subunit alpha type-4 isoform 1 [Homo sapiens]
P17980	case1-VS-control	1.56286	0.224817	6.9517	8	0.000118216	0.000354782	Up	P17980	26S proteasome regulatory subunit 6A OS=Homo sapiens OX=9606 GN=PSMC3 PE=1 SV=3	100	0	NP_002795.2	26S proteasome regulatory subunit 6A [Homo sapiens]
P61158	case1-VS-control	0.863347	0.124212	6.95059	8	0.000118348	0.000354782	None	P61158	Actin-related protein 3 OS=Homo sapiens OX=9606 GN=ACTR3 PE=1 SV=3	100	0	XP_011793093.1	PREDICTED: actin-related protein 3 isoform X1 [Colobus angolensis palliatus]
P63104	case1-VS-control	2.96296	0.426304	6.95034	8	0.000118378	0.000354782	Up	P63104	14-3-3 protein zeta/delta OS=Homo sapiens OX=9606 GN=YWHAZ PE=1 SV=1	100	0	XP_019780606.1	PREDICTED: 14-3-3 protein zeta/delta isoform X1 [Tursiops truncatus]
Q9Y3T9	case1-VS-control	-1.10309	0.158718	-6.95002	8	0.000118416	0.000354782	Down	Q9Y3T9	Nucleolar complex protein 2 homolog OS=Homo sapiens OX=9606 GN=NOC2L PE=1 SV=4	100	0	Q9Y3T9.4	RecName: Full=Nucleolar complex protein 2 homolog; Short=Protein NOC2 homolog; AltName: Full=NOC2-like protein; AltName: Full=Novel INHAT repressor
P50613	case1-VS-control	-0.675128	0.0971609	-6.94856	8	0.00011859	0.000355069	None	P50613	Cyclin-dependent kinase 7 OS=Homo sapiens OX=9606 GN=CDK7 PE=1 SV=1	100	0	NP_001790.1	cyclin-dependent kinase 7 isoform 1 [Homo sapiens]
P09874	case1-VS-control	-1.14359	0.16461	-6.9473	8	0.000118739	0.000355273	Down	P09874	Poly [ADP-ribose] polymerase 1 OS=Homo sapiens OX=9606 GN=PARP1 PE=1 SV=4	100	0	NP_001609.2	poly [ADP-ribose] polymerase 1 [Homo sapiens]
P49959	case1-VS-control	-1.83536	0.264207	-6.94668	8	0.000118814	0.000355273	Down	P49959	Double-strand break repair protein MRE11 OS=Homo sapiens OX=9606 GN=MRE11 PE=1 SV=3	100	0	NP_005582.1	double-strand break repair protein MRE11 isoform 1 [Homo sapiens]
O75844	case1-VS-control	-0.678655	0.0977414	-6.94337	8	0.000119209	0.000356214	None	O75844	CAAX prenyl protease 1 homolog OS=Homo sapiens OX=9606 GN=ZMPSTE24 PE=1 SV=2	100	0	NP_005848.2	CAAX prenyl protease 1 homolog [Homo sapiens]
Q13510	case1-VS-control	-0.621084	0.0894581	-6.94274	8	0.000119285	0.000356214	None	Q13510	Acid ceramidase OS=Homo sapiens OX=9606 GN=ASAH1 PE=1 SV=5	100	0	NP_808592.2	acid ceramidase isoform a preproprotein [Homo sapiens]
Q13232	case1-VS-control	1.27517	0.183707	6.94134	8	0.000119452	0.000356248	Up	Q13232	Nucleoside diphosphate kinase 3 OS=Homo sapiens OX=9606 GN=NME3 PE=1 SV=2	100	1e-121	NP_002504.2	nucleoside diphosphate kinase 3 precursor [Homo sapiens]
Q9NVT9	case1-VS-control	-1.01451	0.146146	-6.94179	8	0.000119399	0.000356248	Down	Q9NVT9	Armadillo repeat-containing protein 1 OS=Homo sapiens OX=9606 GN=ARMC1 PE=1 SV=1	100	0	NP_060590.1	armadillo repeat-containing protein 1 isoform 1 [Homo sapiens]
P38159	case1-VS-control	-1.01122	0.145774	-6.93693	8	0.000119982	0.000357128	Down	P38159	RNA-binding motif protein, X chromosome OS=Homo sapiens OX=9606 GN=RBMX PE=1 SV=3	100	0	NP_002130.2	RNA-binding motif protein, X chromosome isoform 1 [Homo sapiens]
Q92922	case1-VS-control	-1.28663	0.185474	-6.93699	8	0.000119976	0.000357128	Down	Q92922	SWI/SNF complex subunit SMARCC1 OS=Homo sapiens OX=9606 GN=SMARCC1 PE=1 SV=3	100	0	NP_003065.3	SWI/SNF complex subunit SMARCC1 [Homo sapiens]
Q9GZL7	case1-VS-control	-0.559778	0.080689	-6.93748	8	0.000119917	0.000357128	None	Q9GZL7	Ribosome biogenesis protein WDR12 OS=Homo sapiens OX=9606 GN=WDR12 PE=1 SV=2	100	0	NP_060726.3	ribosome biogenesis protein WDR12 [Homo sapiens]
Q14011	case1-VS-control	-0.861056	0.124162	-6.93496	8	0.00012022	0.000357602	None	Q14011	Cold-inducible RNA-binding protein OS=Homo sapiens OX=9606 GN=CIRBP PE=1 SV=1	100	3e-114	XP_011747270.1	PREDICTED: cold-inducible RNA-binding protein isoform X1 [Macaca nemestrina]
P48059	case1-VS-control	1.53749	0.221734	6.93394	8	0.000120344	0.000357738	Up	P48059	LIM and senescent cell antigen-like-containing domain protein 1 OS=Homo sapiens OX=9606 GN=LIMS1 PE=1 SV=4	100	0	XP_003922814.1	PREDICTED: LIM and senescent cell antigen-like-containing domain protein 1 isoform X4 [Saimiri boliviensis boliviensis]
O95671	case1-VS-control	1.66063	0.216901	7.65618	7	0.000120529	0.000357947	Up	O95671	N-acetylserotonin O-methyltransferase-like protein OS=Homo sapiens OX=9606 GN=ASMTL PE=1 SV=3	100	0	NP_004183.2	N-acetylserotonin O-methyltransferase-like protein isoform 1 [Homo sapiens]
Q13601	case1-VS-control	-0.752864	0.108606	-6.93206	8	0.000120572	0.000357947	None	Q13601	KRR1 small subunit processome component homolog OS=Homo sapiens OX=9606 GN=KRR1 PE=1 SV=4	100	0	NP_008974.5	KRR1 small subunit processome component homolog [Homo sapiens]
Q96SB4	case1-VS-control	1.59221	0.229887	6.92606	8	0.000121301	0.000359879	Up	Q96SB4	SRSF protein kinase 1 OS=Homo sapiens OX=9606 GN=SRPK1 PE=1 SV=2	100	0	NP_003128.3	SRSF protein kinase 1 [Homo sapiens]
Q9Y3A2	case1-VS-control	-1.27404	0.184007	-6.9239	8	0.000121565	0.000360427	Down	Q9Y3A2	Probable U3 small nucleolar RNA-associated protein 11 OS=Homo sapiens OX=9606 GN=UTP11 PE=1 SV=2	100	0	NP_057121.2	probable U3 small nucleolar RNA-associated protein 11 [Homo sapiens]
Q53FP2	case1-VS-control	1.58677	0.107302	14.7879	4	0.000121729	0.00036068	Up	Q53FP2	Transmembrane protein 35A OS=Homo sapiens OX=9606 GN=TMEM35A PE=2 SV=2	100	1e-116	NP_067650.1	transmembrane protein 35A [Homo sapiens]
P57740	case1-VS-control	-1.08376	0.156716	-6.91544	8	0.000122605	0.000363039	Down	P57740	Nuclear pore complex protein Nup107 OS=Homo sapiens OX=9606 GN=NUP107 PE=1 SV=1	100	0	NP_065134.1	nuclear pore complex protein Nup107 isoform 1 [Homo sapiens]
O00232	case1-VS-control	1.47545	0.213552	6.9091	8	0.000123391	0.000365127	Up	O00232	26S proteasome non-ATPase regulatory subunit 12 OS=Homo sapiens OX=9606 GN=PSMD12 PE=1 SV=3	100	0	NP_002807.1	26S proteasome non-ATPase regulatory subunit 12 isoform 1 [Homo sapiens]
Q8NB90	case1-VS-control	1.82069	0.263653	6.90564	8	0.000123822	0.000366167	Up	Q8NB90	ATPase family protein 2 homolog OS=Homo sapiens OX=9606 GN=SPATA5 PE=1 SV=3	100	0	NP_660208.2	spermatogenesis-associated protein 5 isoform 1 [Homo sapiens]
P46777	case1-VS-control	0.980808	0.142125	6.90105	8	0.000124397	0.000367628	None	P46777	60S ribosomal protein L5 OS=Homo sapiens OX=9606 GN=RPL5 PE=1 SV=3	100	0	NP_000960.2	60S ribosomal protein L5 [Homo sapiens]
P10398	case1-VS-control	2.39728	0.347435	6.89992	8	0.000124538	0.000367807	Up	P10398	Serine/threonine-protein kinase A-Raf OS=Homo sapiens OX=9606 GN=ARAF PE=1 SV=2	100	0	NP_001645.1	serine/threonine-protein kinase A-Raf isoform 1 [Homo sapiens]
P30040	case1-VS-control	-1.31209	0.190647	-6.8823	8	0.000126775	0.000374169	Down	P30040	Endoplasmic reticulum resident protein 29 OS=Homo sapiens OX=9606 GN=ERP29 PE=1 SV=4	100	0	NP_006808.1	endoplasmic reticulum resident protein 29 isoform 1 precursor [Homo sapiens]
P13639	case1-VS-control	1.81018	0.263045	6.88164	8	0.000126859	0.000374178	Up	P13639	Elongation factor 2 OS=Homo sapiens OX=9606 GN=EEF2 PE=1 SV=4	100	0	NP_001952.1	elongation factor 2 [Homo sapiens]
Q9Y6X9	case1-VS-control	-1.22439	0.178157	-6.87251	8	0.000128035	0.000377402	Down	Q9Y6X9	MORC family CW-type zinc finger protein 2 OS=Homo sapiens OX=9606 GN=MORC2 PE=1 SV=2	100	0	NP_001290185.1	MORC family CW-type zinc finger protein 2 isoform 1 [Homo sapiens]
Q4ZIN3	case1-VS-control	-1.52398	0.221802	-6.87091	8	0.000128243	0.00037777	Down	Q4ZIN3	Membralin OS=Homo sapiens OX=9606 GN=TMEM259 PE=1 SV=1	100	0	NP_001028198.1	membralin isoform 1 [Homo sapiens]
O94906	case1-VS-control	-0.669767	0.0976131	-6.86145	8	0.000129478	0.00038116	None	O94906	Pre-mRNA-processing factor 6 OS=Homo sapiens OX=9606 GN=PRPF6 PE=1 SV=1	99.894	0	XP_011929527.1	PREDICTED: pre-mRNA-processing factor 6 [Cercocebus atys]
P40227	case1-VS-control	1.30905	0.190835	6.8596	8	0.00012972	0.000381629	Up	P40227	T-complex protein 1 subunit zeta OS=Homo sapiens OX=9606 GN=CCT6A PE=1 SV=3	100	0	NP_001753.1	T-complex protein 1 subunit zeta isoform a [Homo sapiens]
O75691	case1-VS-control	-0.942478	0.137442	-6.85728	8	0.000130027	0.000382283	None	O75691	Small subunit processome component 20 homolog OS=Homo sapiens OX=9606 GN=UTP20 PE=1 SV=3	100	0	NP_055318.2	small subunit processome component 20 homolog [Homo sapiens]
P42766	case1-VS-control	0.98964	0.144341	6.85625	8	0.000130161	0.000382433	None	P42766	60S ribosomal protein L35 OS=Homo sapiens OX=9606 GN=RPL35 PE=1 SV=2	100	7e-80	NP_009140.1	60S ribosomal protein L35 [Homo sapiens]
Q15185	case1-VS-control	3.5748	0.521669	6.85262	8	0.000130641	0.000383596	Up	Q15185	Prostaglandin E synthase 3 OS=Homo sapiens OX=9606 GN=PTGES3 PE=1 SV=1	100	7e-115	XP_004773209.1	PREDICTED: prostaglandin E synthase 3 isoform X1 [Mustela putorius furo]
Q53GS9	case1-VS-control	-0.63969	0.0933972	-6.84913	8	0.000131105	0.000384461	None	Q53GS9	U4/U6.U5 tri-snRNP-associated protein 2 OS=Homo sapiens OX=9606 GN=USP39 PE=1 SV=2	100	0	NP_006581.2	U4/U6.U5 tri-snRNP-associated protein 2 isoform 1 [Homo sapiens]
Q9BVC6	case1-VS-control	-0.698789	0.102019	-6.84962	8	0.000131039	0.000384461	None	Q9BVC6	Transmembrane protein 109 OS=Homo sapiens OX=9606 GN=TMEM109 PE=1 SV=1	100	3e-166	NP_076997.1	transmembrane protein 109 precursor [Homo sapiens]
P40123	case1-VS-control	2.25594	0.155795	14.4802	4	0.000132241	0.000387544	Up	P40123	Adenylyl cyclase-associated protein 2 OS=Homo sapiens OX=9606 GN=CAP2 PE=1 SV=1	100	0	NP_006357.1	adenylyl cyclase-associated protein 2 [Homo sapiens]
P14174	case1-VS-control	3.11989	0.456146	6.83967	8	0.00013237	0.000387672	Up	P14174	Macrophage migration inhibitory factor OS=Homo sapiens OX=9606 GN=MIF PE=1 SV=4	100	1e-81	NP_002406.1	macrophage migration inhibitory factor [Homo sapiens]
Q9P0W2	case1-VS-control	2.4465	0.28324	8.63758	6	0.000132643	0.000388224	Up	Q9P0W2	SWI/SNF-related matrix-associated actin-dependent regulator of chromatin subfamily E member 1-related OS=Homo sapiens OX=9606 GN=HMG20B PE=1 SV=1	100	0	NP_006330.2	SWI/SNF-related matrix-associated actin-dependent regulator of chromatin subfamily E member 1-related [Homo sapiens]
P15559	case1-VS-control	2.70578	0.395973	6.83325	8	0.000133236	0.00038971	Up	P15559	NAD(P)H dehydrogenase [quinone] 1 OS=Homo sapiens OX=9606 GN=NQO1 PE=1 SV=1	100	0	NP_000894.1	NAD(P)H dehydrogenase [quinone] 1 isoform a [Homo sapiens]
O00231	case1-VS-control	1.28268	0.187778	6.8308	8	0.000133568	0.000390429	Up	O00231	26S proteasome non-ATPase regulatory subunit 11 OS=Homo sapiens OX=9606 GN=PSMD11 PE=1 SV=3	100	0	NP_002806.2	26S proteasome non-ATPase regulatory subunit 11 [Homo sapiens]
P50991	case1-VS-control	1.48663	0.21769	6.8291	8	0.0001338	0.000390856	Up	P50991	T-complex protein 1 subunit delta OS=Homo sapiens OX=9606 GN=CCT4 PE=1 SV=4	100	0	NP_006421.2	T-complex protein 1 subunit delta isoform a [Homo sapiens]
P50990	case1-VS-control	1.18241	0.173217	6.8262	8	0.000134194	0.000391758	Up	P50990	T-complex protein 1 subunit theta OS=Homo sapiens OX=9606 GN=CCT8 PE=1 SV=4	100	0	NP_006576.2	T-complex protein 1 subunit theta isoform 1 [Homo sapiens]
P20618	case1-VS-control	1.91998	0.281326	6.82475	8	0.000134392	0.000392085	Up	P20618	Proteasome subunit beta type-1 OS=Homo sapiens OX=9606 GN=PSMB1 PE=1 SV=2	100	8e-180	NP_002784.1	proteasome subunit beta type-1 [Homo sapiens]
Q9H840	case1-VS-control	0.952322	0.139593	6.82213	8	0.000134752	0.000392882	None	Q9H840	Gem-associated protein 7 OS=Homo sapiens OX=9606 GN=GEMIN7 PE=1 SV=1	100	4e-91	NP_078983.1	gem-associated protein 7 [Homo sapiens]
Q9Y666	case1-VS-control	-0.671719	0.0985097	-6.81881	8	0.000135207	0.000393959	None	Q9Y666	Solute carrier family 12 member 7 OS=Homo sapiens OX=9606 GN=SLC12A7 PE=1 SV=3	100	0	NP_006589.2	solute carrier family 12 member 7 [Homo sapiens]
P84103	case1-VS-control	-1.25501	0.184093	-6.81729	8	0.000135417	0.000394318	Down	P84103	Serine/arginine-rich splicing factor 3 OS=Homo sapiens OX=9606 GN=SRSF3 PE=1 SV=1	100	8e-110	OPJ89016.1	serine/arginine-rich splicing factor 3 [Patagioenas fasciata monilis]
P22695	case1-VS-control	-0.902673	0.132532	-6.81099	8	0.000136288	0.000396602	None	P22695	Cytochrome b-c1 complex subunit 2, mitochondrial OS=Homo sapiens OX=9606 GN=UQCRC2 PE=1 SV=3	100	0	NP_003357.2	cytochrome b-c1 complex subunit 2, mitochondrial precursor [Homo sapiens]
Q9H0W8	case1-VS-control	1.36377	0.0949518	14.3627	4	0.000136551	0.000397113	Up	Q9H0W8	Protein SMG9 OS=Homo sapiens OX=9606 GN=SMG9 PE=1 SV=1	100	0	NP_061981.2	protein SMG9 [Homo sapiens]
O14980	case1-VS-control	1.42834	0.209835	6.80698	8	0.000136846	0.000397716	Up	O14980	Exportin-1 OS=Homo sapiens OX=9606 GN=XPO1 PE=1 SV=1	100	0	NP_003391.1	exportin-1 [Homo sapiens]
P48556	case1-VS-control	1.49865	0.22053	6.79569	8	0.000138431	0.000402066	Up	P48556	26S proteasome non-ATPase regulatory subunit 8 OS=Homo sapiens OX=9606 GN=PSMD8 PE=1 SV=2	100	0	NP_002803.2	26S proteasome non-ATPase regulatory subunit 8 [Homo sapiens]
P00558	case1-VS-control	2.21706	0.326351	6.79349	8	0.000138742	0.000402715	Up	P00558	Phosphoglycerate kinase 1 OS=Homo sapiens OX=9606 GN=PGK1 PE=1 SV=3	100	0	NP_000282.1	phosphoglycerate kinase 1 [Homo sapiens]
Q13045	case1-VS-control	1.7323	0.255027	6.7926	8	0.000138868	0.000402824	Up	Q13045	Protein flightless-1 homolog OS=Homo sapiens OX=9606 GN=FLII PE=1 SV=2	100	0	NP_002009.1	protein flightless-1 homolog isoform 1 [Homo sapiens]
P18206	case1-VS-control	2.94882	0.434394	6.78836	8	0.00013947	0.000404313	Up	P18206	Vinculin OS=Homo sapiens OX=9606 GN=VCL PE=1 SV=4	100	0	NP_054706.1	vinculin isoform meta-VCL [Homo sapiens]
P62701	case1-VS-control	1.25698	0.185292	6.78378	8	0.000140125	0.000405695	Up	P62701	40S ribosomal protein S4, X isoform OS=Homo sapiens OX=9606 GN=RPS4X PE=1 SV=2	100	0	NP_000998.1	40S ribosomal protein S4, X isoform X isoform [Homo sapiens]
Q9BRP4	case1-VS-control	4.19473	0.0496534	84.4801	2	0.000140088	0.000405695	Up	Q9BRP4	Proteasomal ATPase-associated factor 1 OS=Homo sapiens OX=9606 GN=PAAF1 PE=1 SV=2	100	0	NP_079431.1	proteasomal ATPase-associated factor 1 isoform 2 [Homo sapiens]
P08670	case1-VS-control	-1.21542	0.142137	-8.55103	6	0.000140345	0.000405817	Down	P08670	Vimentin OS=Homo sapiens OX=9606 GN=VIM PE=1 SV=4	100	0	NP_003371.2	vimentin [Homo sapiens]
Q8WVM8	case1-VS-control	-1.65321	0.243751	-6.78237	8	0.000140326	0.000405817	Down	Q8WVM8	Sec1 family domain-containing protein 1 OS=Homo sapiens OX=9606 GN=SCFD1 PE=1 SV=4	100	0	NP_057190.2	sec1 family domain-containing protein 1 isoform a [Homo sapiens]
P62861	case1-VS-control	1.92462	0.283875	6.77983	8	0.000140691	0.000406559	Up	P62861	40S ribosomal protein S30 OS=Homo sapiens OX=9606 GN=FAU PE=1 SV=1	100	2e-34	ABD75367.1	arsenite-resistance protein, partial [Bufo gargarizans]
O14683	case1-VS-control	-2.77666	0.194841	-14.2509	4	0.000140817	0.000406651	Down	O14683	Tumor protein p53-inducible protein 11 OS=Homo sapiens OX=9606 GN=TP53I11 PE=1 SV=2	100	1e-135	NP_006025.2	tumor protein p53-inducible protein 11 isoform a [Homo sapiens]
Q8N1G4	case1-VS-control	4.22725	0.623638	6.77837	8	0.000140901	0.000406651	Up	Q8N1G4	Leucine-rich repeat-containing protein 47 OS=Homo sapiens OX=9606 GN=LRRC47 PE=1 SV=1	100	0	NP_065761.1	leucine-rich repeat-containing protein 47 [Homo sapiens]
Q14554	case1-VS-control	-0.580693	0.0856927	-6.77645	8	0.000141178	0.000407191	None	Q14554	Protein disulfide-isomerase A5 OS=Homo sapiens OX=9606 GN=PDIA5 PE=1 SV=1	100	0	NP_006801.1	protein disulfide-isomerase A5 precursor [Homo sapiens]
Q04206	case1-VS-control	2.51328	0.37096	6.77508	8	0.000141376	0.00040725	Up	Q04206	Transcription factor p65 OS=Homo sapiens OX=9606 GN=RELA PE=1 SV=2	100	0	NP_068810.3	transcription factor p65 isoform 1 [Homo sapiens]
Q14919	case1-VS-control	1.42559	0.210415	6.77515	8	0.000141365	0.00040725	Up	Q14919	Dr1-associated corepressor OS=Homo sapiens OX=9606 GN=DRAP1 PE=1 SV=3	100	2e-148	NP_006433.2	dr1-associated corepressor [Homo sapiens]
Q96A72	case1-VS-control	0.420502	0.0620814	6.7734	8	0.000141619	0.000407434	None	Q96A72	Protein mago nashi homolog 2 OS=Homo sapiens OX=9606 GN=MAGOHB PE=1 SV=1	100	7e-106	NP_060518.1	protein mago nashi homolog 2 isoform 1 [Homo sapiens]
Q9Y4D1	case1-VS-control	-2.57936	0.248014	-10.4	5	0.000141593	0.000407434	Down	Q9Y4D1	Disheveled-associated activator of morphogenesis 1 OS=Homo sapiens OX=9606 GN=DAAM1 PE=1 SV=2	100	0	NP_055807.1	disheveled-associated activator of morphogenesis 1 isoform 1 [Homo sapiens]
P46782	case1-VS-control	1.50681	0.222518	6.77163	8	0.000141875	0.000407649	Up	P46782	40S ribosomal protein S5 OS=Homo sapiens OX=9606 GN=RPS5 PE=1 SV=4	100	1e-151	XP_017706029.1	PREDICTED: 40S ribosomal protein S5 isoform X2 [Rhinopithecus bieti]
Q00839	case1-VS-control	0.427996	0.0632099	6.77104	8	0.000141962	0.000407649	None	Q00839	Heterogeneous nuclear ribonucleoprotein U OS=Homo sapiens OX=9606 GN=HNRNPU PE=1 SV=6	100	0	NP_114032.2	heterogeneous nuclear ribonucleoprotein U isoform a [Homo sapiens]
Q9BVG9	case1-VS-control	-0.866999	0.128042	-6.77118	8	0.00014194	0.000407649	None	Q9BVG9	Phosphatidylserine synthase 2 OS=Homo sapiens OX=9606 GN=PTDSS2 PE=1 SV=1	100	0	NP_110410.1	phosphatidylserine synthase 2 isoform 2 [Homo sapiens]
P30153	case1-VS-control	1.25759	0.185897	6.76501	8	0.00014284	0.000409268	Up	P30153	Serine/threonine-protein phosphatase 2A 65 kDa regulatory subunit A alpha isoform OS=Homo sapiens OX=9606 GN=PPP2R1A PE=1 SV=4	100	0	NP_055040.2	serine/threonine-protein phosphatase 2A 65 kDa regulatory subunit A alpha isoform [Homo sapiens]
P62241	case1-VS-control	1.28041	0.189278	6.7647	8	0.000142885	0.000409268	Up	P62241	40S ribosomal protein S8 OS=Homo sapiens OX=9606 GN=RPS8 PE=1 SV=2	100	9e-151	NP_001003.1	40S ribosomal protein S8 [Homo sapiens]
Q9BTE3	case1-VS-control	1.75568	0.259524	6.76501	8	0.00014284	0.000409268	Up	Q9BTE3	Mini-chromosome maintenance complex-binding protein OS=Homo sapiens OX=9606 GN=MCMBP PE=1 SV=2	100	0	NP_079110.1	mini-chromosome maintenance complex-binding protein isoform 1 [Homo sapiens]
Q9Y2I7	case1-VS-control	-1.0742	0.158772	-6.76563	8	0.000142749	0.000409268	Down	Q9Y2I7	1-phosphatidylinositol 3-phosphate 5-kinase OS=Homo sapiens OX=9606 GN=PIKFYVE PE=1 SV=3	100	0	NP_055855.2	1-phosphatidylinositol 3-phosphate 5-kinase isoform 2 [Homo sapiens]
O43719	case1-VS-control	-0.526212	0.0778148	-6.76237	8	0.000143227	0.000409915	None	O43719	HIV Tat-specific factor 1 OS=Homo sapiens OX=9606 GN=HTATSF1 PE=1 SV=1	100	0	NP_055315.2	HIV Tat-specific factor 1 [Homo sapiens]
Q9BVV7	case1-VS-control	-0.850389	0.114155	-7.44941	7	0.000143291	0.000409915	None	Q9BVV7	Mitochondrial import inner membrane translocase subunit Tim21 OS=Homo sapiens OX=9606 GN=TIMM21 PE=1 SV=1	100	0	NP_054896.2	mitochondrial import inner membrane translocase subunit Tim21 precursor [Homo sapiens]
P23396	case1-VS-control	1.96353	0.290572	6.75747	8	0.000143948	0.000411537	Up	P23396	40S ribosomal protein S3 OS=Homo sapiens OX=9606 GN=RPS3 PE=1 SV=2	100	2e-176	NP_000996.2	40S ribosomal protein S3 isoform 1 [Homo sapiens]
Q8WUY1	case1-VS-control	-0.96975	0.14353	-6.75642	8	0.000144103	0.000411722	None	Q8WUY1	Protein THEM6 OS=Homo sapiens OX=9606 GN=THEM6 PE=1 SV=2	100	1e-144	NP_057731.1	protein THEM6 precursor [Homo sapiens]
P78371	case1-VS-control	1.29101	0.191186	6.75264	8	0.000144661	0.000413058	Up	P78371	T-complex protein 1 subunit beta OS=Homo sapiens OX=9606 GN=CCT2 PE=1 SV=4	100	0	NP_006422.1	T-complex protein 1 subunit beta isoform 1 [Homo sapiens]
Q9UBV2	case1-VS-control	-1.48503	0.219966	-6.7512	8	0.000144876	0.000413412	Down	Q9UBV2	Protein sel-1 homolog 1 OS=Homo sapiens OX=9606 GN=SEL1L PE=1 SV=3	100	0	NP_005056.3	protein sel-1 homolog 1 isoform 1 precursor [Homo sapiens]
O43708	case1-VS-control	-2.45343	0.331011	-7.41192	7	0.000147917	0.000421828	Down	O43708	Maleylacetoacetate isomerase OS=Homo sapiens OX=9606 GN=GSTZ1 PE=1 SV=3	100	7e-160	O43708.3	RecName: Full=Maleylacetoacetate isomerase; Short=MAAI; AltName: Full=GSTZ1-1; AltName: Full=Glutathione S-transferase zeta 1
P30041	case1-VS-control	3.84095	0.570738	6.7298	8	0.000148094	0.000422067	Up	P30041	Peroxiredoxin-6 OS=Homo sapiens OX=9606 GN=PRDX6 PE=1 SV=3	100	4e-163	NP_004896.1	peroxiredoxin-6 [Homo sapiens]
P36543	case1-VS-control	-0.638342	0.0948839	-6.72761	8	0.000148427	0.000422751	None	P36543	V-type proton ATPase subunit E 1 OS=Homo sapiens OX=9606 GN=ATP6V1E1 PE=1 SV=1	100	2e-162	NP_001687.1	V-type proton ATPase subunit E 1 isoform a [Homo sapiens]
P51659	case1-VS-control	-0.631023	0.0938124	-6.72643	8	0.000148606	0.000422974	None	P51659	Peroxisomal multifunctional enzyme type 2 OS=Homo sapiens OX=9606 GN=HSD17B4 PE=1 SV=3	100	0	NP_000405.1	peroxisomal multifunctional enzyme type 2 isoform 2 [Homo sapiens]
Q9UHD1	case1-VS-control	2.91163	0.432899	6.72589	8	0.00014869	0.000422974	Up	Q9UHD1	Cysteine and histidine-rich domain-containing protein 1 OS=Homo sapiens OX=9606 GN=CHORDC1 PE=1 SV=2	100	0	NP_036256.2	cysteine and histidine-rich domain-containing protein 1 isoform a [Homo sapiens]
P30626	case1-VS-control	3.6703	0.546215	6.71952	8	0.000149667	0.000425487	Up	P30626	Sorcin OS=Homo sapiens OX=9606 GN=SRI PE=1 SV=1	100	1e-146	NP_003121.1	sorcin isoform A [Homo sapiens]
Q9C0J8	case1-VS-control	-1.62558	0.24199	-6.71756	8	0.000149968	0.000426078	Down	Q9C0J8	pre-mRNA 3' end processing protein WDR33 OS=Homo sapiens OX=9606 GN=WDR33 PE=1 SV=2	100	0	NP_060853.3	pre-mRNA 3' end processing protein WDR33 isoform 1 [Homo sapiens]
P19404	case1-VS-control	-0.661562	0.0985372	-6.71384	8	0.000150545	0.000427232	None	P19404	NADH dehydrogenase [ubiquinone] flavoprotein 2, mitochondrial OS=Homo sapiens OX=9606 GN=NDUFV2 PE=1 SV=2	100	0	NP_066552.2	NADH dehydrogenase [ubiquinone] flavoprotein 2, mitochondrial precursor [Homo sapiens]
Q9HCG7	case1-VS-control	-1.30946	0.127528	-10.268	5	0.000150562	0.000427232	Down	Q9HCG7	Non-lysosomal glucosylceramidase OS=Homo sapiens OX=9606 GN=GBA2 PE=1 SV=2	100	0	NP_065995.1	non-lysosomal glucosylceramidase isoform 1 [Homo sapiens]
Q99549	case1-VS-control	-1.30022	0.175961	-7.38929	7	0.000150791	0.000427617	Down	Q99549	M-phase phosphoprotein 8 OS=Homo sapiens OX=9606 GN=MPHOSPH8 PE=1 SV=2	100	0	NP_059990.2	M-phase phosphoprotein 8 [Homo sapiens]
Q9C0C2	case1-VS-control	1.30306	0.194174	6.7108	8	0.000151017	0.00042799	Up	Q9C0C2	182 kDa tankyrase-1-binding protein OS=Homo sapiens OX=9606 GN=TNKS1BP1 PE=1 SV=4	100	0	NP_203754.2	182 kDa tankyrase-1-binding protein [Homo sapiens]
P08195	case1-VS-control	0.507191	0.0756286	6.70634	8	0.000151712	0.000429426	None	P08195	4F2 cell-surface antigen heavy chain OS=Homo sapiens OX=9606 GN=SLC3A2 PE=1 SV=3	100	0	NP_002385.3	4F2 cell-surface antigen heavy chain isoform c [Homo sapiens]
P80723	case1-VS-control	1.3653	0.161889	8.43357	6	0.000151639	0.000429426	Up	P80723	Brain acid soluble protein 1 OS=Homo sapiens OX=9606 GN=BASP1 PE=1 SV=2	100	3e-134	NP_006308.3	brain acid soluble protein 1 [Homo sapiens]
P09960	case1-VS-control	4.35661	0.649943	6.70305	8	0.000152226	0.000430293	Up	P09960	Leukotriene A-4 hydrolase OS=Homo sapiens OX=9606 GN=LTA4H PE=1 SV=2	100	0	NP_000886.1	leukotriene A-4 hydrolase isoform 1 [Homo sapiens]
P25786	case1-VS-control	1.8273	0.272627	6.70258	8	0.000152301	0.000430293	Up	P25786	Proteasome subunit alpha type-1 OS=Homo sapiens OX=9606 GN=PSMA1 PE=1 SV=1	100	0	EAW68477.1	proteasome (prosome, macropain) subunit, alpha type, 1, isoform CRA_b [Homo sapiens]
Q8N3X1	case1-VS-control	-0.872059	0.130099	-6.70306	8	0.000152226	0.000430293	None	Q8N3X1	Formin-binding protein 4 OS=Homo sapiens OX=9606 GN=FNBP4 PE=1 SV=3	100	0	NP_056123.2	formin-binding protein 4 isoform 2 [Homo sapiens]
Q92990	case1-VS-control	4.34068	0.588512	7.37568	7	0.000152549	0.00043046	Up	Q92990	Glomulin OS=Homo sapiens OX=9606 GN=GLMN PE=1 SV=2	100	0	NP_444504.1	glomulin isoform 1 [Homo sapiens]
Q9H3S5	case1-VS-control	-1.29718	0.153962	-8.42533	6	0.000152471	0.00043046	Down	Q9H3S5	GPI mannosyltransferase 1 OS=Homo sapiens OX=9606 GN=PIGM PE=1 SV=1	100	0	NP_660150.1	GPI mannosyltransferase 1 [Homo sapiens]
Q8NFH3	case1-VS-control	-1.19658	0.178627	-6.69878	8	0.000152899	0.00043118	Down	Q8NFH3	Nucleoporin Nup43 OS=Homo sapiens OX=9606 GN=NUP43 PE=1 SV=1	100	0	NP_942590.1	nucleoporin Nup43 [Homo sapiens]
Q14684	case1-VS-control	-1.06361	0.158917	-6.69288	8	0.000153832	0.000433544	Down	Q14684	Ribosomal RNA processing protein 1 homolog B OS=Homo sapiens OX=9606 GN=RRP1B PE=1 SV=3	100	0	NP_055871.1	ribosomal RNA processing protein 1 homolog B [Homo sapiens]
Q9Y282	case1-VS-control	-0.905177	0.135359	-6.68722	8	0.000154733	0.000435813	None	Q9Y282	Endoplasmic reticulum-Golgi intermediate compartment protein 3 OS=Homo sapiens OX=9606 GN=ERGIC3 PE=1 SV=1	100	0	NP_057050.1	endoplasmic reticulum-Golgi intermediate compartment protein 3 isoform b [Homo sapiens]
P62263	case1-VS-control	1.30372	0.19511	6.68196	8	0.000155576	0.000437918	Up	P62263	40S ribosomal protein S14 OS=Homo sapiens OX=9606 GN=RPS14 PE=1 SV=3	100	3e-107	XP_018107476.1	PREDICTED: 40S ribosomal protein S14 isoform X1 [Xenopus laevis]
P47914	case1-VS-control	1.04511	0.156493	6.67831	8	0.000156163	0.000439299	Up	P47914	60S ribosomal protein L29 OS=Homo sapiens OX=9606 GN=RPL29 PE=1 SV=2	100	2e-108	NP_000983.1	60S ribosomal protein L29 [Homo sapiens]
P62195	case1-VS-control	1.36627	0.204697	6.67459	8	0.000156766	0.000440723	Up	P62195	26S proteasome regulatory subunit 8 OS=Homo sapiens OX=9606 GN=PSMC5 PE=1 SV=1	100	0	XP_012516712.1	PREDICTED: 26S protease regulatory subunit 8 [Propithecus coquereli]
Q14203	case1-VS-control	-0.921602	0.138303	-6.66364	8	0.000158552	0.000445469	None	Q14203	Dynactin subunit 1 OS=Homo sapiens OX=9606 GN=DCTN1 PE=1 SV=3	100	0	NP_004073.2	dynactin subunit 1 isoform 1 [Homo sapiens]
Q9H7B4	case1-VS-control	2.25348	0.338297	6.66127	8	0.000158941	0.000446191	Up	Q9H7B4	Histone-lysine N-methyltransferase SMYD3 OS=Homo sapiens OX=9606 GN=SMYD3 PE=1 SV=4	100	0	NP_001161212.1	histone-lysine N-methyltransferase SMYD3 isoform 1 [Homo sapiens]
Q9P2I0	case1-VS-control	-1.44435	0.21684	-6.66088	8	0.000159005	0.000446191	Down	Q9P2I0	Cleavage and polyadenylation specificity factor subunit 2 OS=Homo sapiens OX=9606 GN=CPSF2 PE=1 SV=2	100	0	NP_059133.1	cleavage and polyadenylation specificity factor subunit 2 isoform 1 [Homo sapiens]
P49773	case1-VS-control	4.75972	0.715057	6.65641	8	0.000159743	0.000447987	Up	P49773	Histidine triad nucleotide-binding protein 1 OS=Homo sapiens OX=9606 GN=HINT1 PE=1 SV=2	100	2e-88	NP_005331.1	histidine triad nucleotide-binding protein 1 [Homo sapiens]
Q9NPA8	case1-VS-control	-0.565584	0.0849923	-6.65453	8	0.000160054	0.000448585	None	Q9NPA8	Transcription and mRNA export factor ENY2 OS=Homo sapiens OX=9606 GN=ENY2 PE=1 SV=1	100	5e-67	NP_064574.1	transcription and mRNA export factor ENY2 isoform 1 [Homo sapiens]
Q95604	case1-VS-control	-0.962722	0.144705	-6.65299	8	0.000160311	0.000449027	None	Q95604	HLA class I histocompatibility antigen, Cw-17 alpha chain OS=Homo sapiens OX=9606 GN=HLA-C PE=1 SV=1	100	0	Q95604.1	RecName: Full=HLA class I histocompatibility antigen, Cw-17 alpha chain; AltName: Full=MHC class I antigen Cw*17; Flags: Precursor
Q9H479	case1-VS-control	1.19304	0.0866132	13.7743	4	0.000160976	0.000450615	Up	Q9H479	Fructosamine-3-kinase OS=Homo sapiens OX=9606 GN=FN3K PE=1 SV=1	100	0	NP_071441.1	fructosamine-3-kinase [Homo sapiens]
P00491	case1-VS-control	3.64236	0.548022	6.64637	8	0.000161414	0.000451285	Up	P00491	Purine nucleoside phosphorylase OS=Homo sapiens OX=9606 GN=PNP PE=1 SV=2	100	0	NP_000261.2	purine nucleoside phosphorylase [Homo sapiens]
Q9NVA1	case1-VS-control	-1.28621	0.193513	-6.64664	8	0.000161369	0.000451285	Down	Q9NVA1	Ubiquinol-cytochrome-c reductase complex assembly factor 1 OS=Homo sapiens OX=9606 GN=UQCC1 PE=1 SV=3	100	0	NP_060714.3	ubiquinol-cytochrome-c reductase complex assembly factor 1 isoform a [Homo sapiens]
Q15386	case1-VS-control	2.97783	0.448248	6.64328	8	0.000161932	0.000451691	Up	Q15386	Ubiquitin-protein ligase E3C OS=Homo sapiens OX=9606 GN=UBE3C PE=1 SV=3	100	0	NP_055486.2	ubiquitin-protein ligase E3C [Homo sapiens]
Q6P2Q9	case1-VS-control	-0.621448	0.0935454	-6.64328	8	0.000161932	0.000451691	None	Q6P2Q9	Pre-mRNA-processing-splicing factor 8 OS=Homo sapiens OX=9606 GN=PRPF8 PE=1 SV=2	100	0	NP_006436.3	pre-mRNA-processing-splicing factor 8 [Homo sapiens]
Q9BPW8	case1-VS-control	-1.08753	0.163708	-6.64314	8	0.000161955	0.000451691	Down	Q9BPW8	Protein NipSnap homolog 1 OS=Homo sapiens OX=9606 GN=NIPSNAP1 PE=1 SV=1	100	0	NP_003625.2	protein NipSnap homolog 1 isoform 1 [Homo sapiens]
[truncated: 2,932 more rows]
