# Supplementary material for: WITHDRAWN: Integrative Analysis of the Proteome and Transcriptome in Gastric Cancer Identified Membrane Protein LRP1B as a Potential Biomarker
Source: Research Square preprint supplement (doi:10.21203/rs.3.rs-1280408/v1), 2022-01-26
Supplement: Supplementary file 3 [file bc157ff4f59ac00be38acff6.docx]

**Supplementary Methods:**

Protein extraction, quality control, enzymolysis and mass spectrometry analysis were performed according to our previously reported protocol[1].

**Protein extraction**

(1) weigh the appropriate amount of sample, transfer it into a 1.5mL centrifuge tube; (2) add a 5mm magnetic bead, an appropriate amount of Lysis Buffer 3, 1mM PMSF, 2mM EDTA, and put on ice for 5 minutes, then add DTT with the final concentration of 10mM; (3) use a grinder (frequency, 50HZ; time 2 minutes) to crush the tissue, centrifuge at 25,000g*4°C for 15 minutes, and take the supernatant; (4) add DTT with the final concentration of 10mM, water bath at 56°C for 1 hour; (5) (4) add 55mM IAM and place in a dark room for 45 minutes; (5) add cold acetone to the protein solution at a ratio of 1:4, place in a refrigerator at -20°C for 2 hours, centrifuge at 25,000g*4°C for 15 minutes, and discard the supernatant; (6) add a 5mm magnetic bead and an appropriate amount of Lysis Buffer 3 for precipitation; (7) use a grinder (frequency, 50HZ; time, 2 minutes) to promote protein solubilization; (8) Centrifuge for 15 minutes at 25,000g*4°C to take the supernatant, obtain the final protein solution.

**Quality control**

(1) Standard proteins (0.2μg/μL BSA) 0, 2, 4, 6, 8, 10, 12, 14, 16, 18μL were sequentially added to the 96-well microtiter plates A1 to A10, followed by the addition of pure water 20, 18, 16, 14, 12, 10, 8, 6, 4, 2μL, and then 180μL of Coomassie Brilliant Blue G-250 Quantitative Working Solution was added to each well. The OD595 was measured with a microplate reader, and a linear standard curve was drawn based on the OD595 and protein concentration. Diluted the protein solution to be tested several times, added 180μL of the quantitative working solution to 20μL of the protein solution, and read at OD595. The sample protein concentration was calculated from the standard curve and sample OD595. (2) Each 10μg of protein solution was mixed with an appropriate amount of loading buffer, heated at 95°C for 5 minutes, centrifuged at 25,000g for 5 minutes, and the supernatant was loaded into a well of a 12% SDS polyacrylamide gel, 80V constant pressure electrophoresis for 30 minutes followed by 120V constant pressure electrophoresis for 120 minutes; After electrophoresis, the gel was stained and de-stained by a protein staining instrument for 10 minutes and the images were scanned.

**Enzymolysis**

(1) Sampling: Took 100μg (total amount of protein for digestion is adjusted according to theproject requirements) and added it to a 1.5mL centrifuge tube; (2) Dilution of protein solution: If there is high concentration of urea or SDS in the protein solution, it should be diluted with 0.5M TEAB to make the final concentration of urea less than 2M, and the final concentration of SDS is less than 0.1%; (3) According to Trypsin enzyme (μg): substrate protein (μg) = 1:20, enzyme solution was added, vortexed, centrifuged at low speed for 1 minute, and incubated at 37°C for 4 hours; (4) Took out the digested peptide liquid for desalting; (5) Freeze-dried the peptide liquid obtained after salt removal.

**High pH reverse-phase separation**

All samples were mixed equally (10μg/sample), and 200μg sample was diluted with 2 mL buffer A (5% ACN, pH 9.8) and injected onto a Shimadzu LC-20AB liquid phase system. A 5 μm, 4.6 x 250 mm Gemini C18 column was used for liquid phase separation of samples. Gradient elution was applied at a flow rate of 1 mL/min: 5% buffer B (95% ACN, pH 9.8) for 10 min, 5% to 35% buffer B for 40 min, and 35% to 95% buffer B for 1 min. Phase B lasted 3 min and 5% buffer B was equilibrated for 10 min. The elution peak was monitored at a wavelength of 214 nm and one component was collected every minute. The sample was combined with the elution peak of the chromatogram to obtain 10 components, and then freeze-dried.

**High performance liquid chromatography (HPLC)**

The dried peptide samples were reconstituted with mobile phase A (2% ACN, 0.1% FA), centrifuged at 20,000g for 10 minutes, and the supernatant was taken for injection. Separation was performed by Thermo UltiMate 3000 UHPLC. The sample was first enriched in trap column and desalted, and then entered a self-packed C18 column (150 μm inner diameter, 1.8 μm column diameter, 25 cm column length) and separated at a flow rate of 500nL/min by the following effective gradient: 0-5 min, 5% buffer B (98% ACN, 0.1% FA); 5-160 min, 5% to 35% buffer B; 160-170 min, 35% to 80% buffer B; 170-175 min, 80% buffer B; 176-180 min, 5% buffer B. The nanoliter liquid separation end is directly connected to the mass spectrometer.

**DDA proteomics analysis**

The peptides separated by liquid phase chromatography were ionized by a nanoESI source and then passed to a tandem mass spectrometer Q-Exactive HF (Thermo Fisher Scientific, San Jose, CA) for DDA mode detection. The main parameters were set: ion source voltage was set to 1.6kV, MS1 scanning range was 350~1,500m/z; resolution was set to 60,000; MS2 starting m/z was fixed at 100; resolution was 15,000. The ion screening conditions for MS2 fragmentation: charge 2+ to 7+, and the top 20 parent ions with the peak intensity exceeding 10,000. The ion fragmentation mode was HCD, and the fragment ions were detected in Orbitrap. The dynamic exclusion time was set to 30 seconds. The AGC was set to: MS1 3E6, MS2 1E5.

**DIA proteomics analysis**

The same nano-LC system and gradient are used for DIA analysis. DIA MS parameters were set to: ion source voltage was set to 1.6kV, MS1 scanning range was 350~1,500m/z; resolution was set to 1200,000; divided 350-1500Da into 40 windows for fragmentation and signal acquisition. The ion fragmentation mode was HCD, and the fragment ions were detected in Orbitrap. The dynamic exclusion time was set to 30 seconds. The AGC was set to: MS1 3E6, MS2 1E5.

**Data processing**

Protein identification was achieved using MaxQuant (v 1.5.3.30) and searched against the human canonical UniProt database. The DIA data were analyzed by Spectronaut (Biognosys AG, Switzerland). The false discovery rates (FDRs) for the peptide-to-spectrum match, protein, and site were each set at lower than 1%. The fold changes and p values for differentially expressed proteins were estimated by MSstats.

**Reference:**

1. Wang C, Yang Z, Xu E, Shen X, Wang X, Li Z *et al*: **Apolipoprotein C-II induces EMT to promote gastric cancer peritoneal metastasis via PI3K/AKT/mTOR pathway**. *Clin Transl Med* 2021, **11**(8):e522.
