# Supplementary material for: WITHDRAWN: Integrative Analysis of the Proteome and Transcriptome in Gastric Cancer Identified Membrane Protein LRP1B as a Potential Biomarker
Source: Research Square preprint supplement (doi:10.21203/rs.3.rs-1280408/v1), 2022-01-26
Supplement: Supplementary file 4 [file c3d52293e8750486a3d4ce76.docx]

**Supplementary Table 3**: The significantly changed genes in the transcriptional and proteomic profiles

| **Gene** | **UNIPROT** | **MKN-45 *vs*. GES-1** | |  | **AGS *vs*. GES-1** | |  | **TCGA (edgeR)** | |
| --- | --- | --- | --- | --- | --- | --- | --- | --- | --- |
| log2FC | adj_pvalue |  | log2FC | adj_pvalue |  | log2FC | adj_pvalue |
| **GPRC5A** | Q8NFJ5 | 1.157739 | 3.77E-05 |  | 1.585697 | 1.73E-05 |  | 1.824091 | 3.38E-10 |
| **PSAT1** | Q9Y617 | 5.126826 | 0.000121 |  | 3.389695 | 0.002648 |  | 1.211554 | 7.14E-06 |
| **NUDCD1** | Q96RS6 | 2.769391 | 3.50E-06 |  | 1.208181 | 0.000684 |  | 1.2834 | 5.18E-18 |
| **RCC2** | Q9P258 | 1.103211 | 0.001318 |  | 1.815064 | 0.000225 |  | 1.248866 | 1.34E-19 |
| **IPO4** | Q8TEX9 | 3.256737 | 0.001836 |  | 1.954773 | 0.035549 |  | 1.035132 | 1.73E-12 |
| **FAM91A1** | Q658Y4 | 1.244138 | 0.002711 |  | 1.256326 | 0.005426 |  | 1.183527 | 3.44E-18 |
| **KANK2** | Q63ZY3 | -1.95513 | 0.000209 |  | -2.01243 | 0.000442 |  | -1.63814 | 1.18E-17 |
| **PRADC1** | Q9BSG0 | -1.18146 | 0.001631 |  | -1.08061 | 0.003312 |  | -1.12765 | 3.58E-18 |
| **NME4** | O00746 | -2.806 | 9.69E-06 |  | -1.09036 | 0.002239 |  | -1.13024 | 7.92E-11 |
| **METTL7A** | Q9H8H3 | -2.69368 | 8.96E-05 |  | -1.58955 | 0.000489 |  | -1.61483 | 3.97E-22 |
| **LRP1B** | Q9NZR2 | -3.33243 | 0.0002 |  | -3.796 | 0.000449 |  | -1.96833 | 7.29E-11 |

FC: fold change
